# Supplementary material for: Nanchangmycin regulates FYN, PTK2, and MAPK1/3 to control the fibrotic activity of human hepatic stellate cells
Source: eLife. 2022 May 26;11:e74513. doi: 10.7554/eLife.74513 (PMC9135407; doi:10.7554/eLife.74513)
Supplement: Supplementary file 9. — This table contains the 1904 mRNAs up-regulated (increase fold change >2, FDR <0.05) and the 2620 mRNAs down-regulated (decrease fold change >2, FDR <0.05) by NCMC treatment. [file elife-74513-supp9.xlsx]

## Sheet: Up>2 FDR<0.05
ENSEMBL_ID	GENE	baseMean	baseMean_control	baseMean_Nanch	log2FoldChange	pvalue	padj	control1	control2	Nanch1	Nanch2	Nanch3
ENSG00000094914.14	AAAS	604.005	323.578	790.956	1.28172	3.56772e-35	3.11096e-34	355.176	291.98	815.361	819.114	738.394
ENSG00000167972.14	ABCA3	234.316	9.62937	384.108	5.31023	8.43084e-45	9.0972e-44	10.0522	9.20658	414.969	385.14	352.214
ENSG00000064687.13	ABCA7	259.207	137.541	340.318	1.30607	4.16623e-22	2.47815e-21	139.613	135.468	341.11	337.228	342.615
ENSG00000197150.13	ABCB8	582.857	211.684	830.306	1.9689	1.88762e-75	3.47785e-74	215.563	207.806	886.304	799.765	804.849
ENSG00000125257.16	ABCC4	377.322	211.037	488.178	1.21659	4.00266e-26	2.69189e-25	193.225	228.849	492.715	476.357	495.462
ENSG00000158201.10	ABHD3	66.4379	28.3297	91.8434	1.69255	5.69687e-09	1.87456e-08	29.0396	27.6197	97.1824	91.2174	87.1305
ENSG00000154175.18	ABI3BP	937.728	490.675	1235.76	1.32937	2.8278e-62	4.2748e-61	502.608	478.742	1267.26	1265.99	1174.05
ENSG00000119328.12	ABITRAM	164.012	99.3208	207.14	1.05981	4.99819e-10	1.76216e-09	96.054	102.588	210.886	219.29	191.244
ENSG00000173210.20	ABLIM3	1476.4	726.305	1976.46	1.44643	1.5496e-111	4.31079e-110	700.301	752.309	1977.66	1995.73	1956
ENSG00000280347.1	AC000123.3	21.7024	10.3861	29.2466	1.50578	0.00429636	0.00796508	8.93525	11.837	24.2956	33.17	30.2741
ENSG00000262227.1	AC004771.2	9.68031	3.74736	13.6356	1.89798	0.0272382	0.044199	2.23381	5.2609	13.6055	11.0567	16.2447
ENSG00000244701.1	AC004918.1	16.5126	4.10749	24.7827	2.56726	0.000425307	0.000909989	5.58453	2.63045	18.4647	28.563	27.3206
ENSG00000270157.1	AC004918.3	13.3993	5.32356	18.7831	1.79585	0.0143518	0.0244832	6.70144	3.94568	16.521	25.7989	14.0295
ENSG00000205485.13	AC004980.1	54.7971	33.6532	68.8931	1.02555	0.000614838	0.00128586	35.741	31.5654	70.9432	73.711	62.0251
ENSG00000281039.1	AC005154.5	6.99607	0	11.6601	5.70113	0.000786147	0.00162158	0	0	20.4083	6.44971	8.12233
ENSG00000268030.1	AC005253.1	23.366	11.9988	30.9441	1.39911	0.00954227	0.0167487	5.58453	18.4132	30.1266	33.17	29.5357
ENSG00000268205.1	AC005261.1	138.31	73.5851	181.461	1.29594	3.67076e-10	1.30216e-09	74.8328	72.3374	211.858	175.985	156.539
ENSG00000284930.1	AC005280.2	5.07382	0.558453	8.08406	3.7396	0.0283116	0.0457729	1.11691	0	12.6337	6.44971	5.16876
ENSG00000277476.1	AC005332.5	20.2156	9.82769	27.1408	1.48356	0.00652714	0.0117657	7.81835	11.837	23.3238	28.563	29.5357
ENSG00000278917.1	AC006213.6	16.5939	8.61162	21.9154	1.36271	0.0218048	0.03597	6.70144	10.5218	23.3238	20.2705	22.1518
ENSG00000267575.7	AC006504.5	119.05	51.9569	163.778	1.6452	3.67193e-14	1.60679e-13	59.1961	44.7177	172.985	152.95	165.4
ENSG00000281468.1	AC006504.7	14.0377	6.63878	18.9704	1.51537	0.0211868	0.03504	6.70144	6.57613	16.521	21.1919	19.1982
ENSG00000278817.1	AC007325.4	21.9097	0	36.5162	7.34858	1.21232e-06	3.36225e-06	0	0	50.5349	33.17	25.8438
ENSG00000239467.6	AC007405.3	5.57048	0.657613	8.84572	3.86206	0.0192495	0.0320894	0	1.31523	6.80277	10.1353	9.59912
ENSG00000261799.1	AC007406.4	30.7445	17.9435	39.2786	1.12445	0.00757675	0.0134852	20.1043	15.7827	42.7603	32.2486	42.8268
ENSG00000261644.2	AC007728.2	16.357	5.42272	23.6465	2.11792	0.00187347	0.00366578	5.58453	5.2609	31.0984	18.4278	21.4134
ENSG00000273015.2	AC008124.1	64.1643	38.0217	81.5927	1.08601	0.000228074	0.000504426	45.7932	30.2502	76.7741	94.9029	73.101
ENSG00000269399.2	AC008764.6	11.4158	3.54904	16.6604	2.20299	0.0104499	0.0182077	4.46763	2.63045	25.2674	12.8994	11.8143
ENSG00000249042.6	AC008771.1	107.193	51.795	144.126	1.47908	5.82892e-07	1.65784e-06	53.6115	49.9786	91.3515	170.457	170.569
ENSG00000287263.1	AC008875.3	56.8889	29.4101	75.2081	1.33029	4.1182e-05	9.8915e-05	39.0917	19.7284	80.6614	75.5538	69.409
ENSG00000273297.2	AC009275.1	14.3438	6.73794	19.4144	1.54661	0.0224998	0.0370297	5.58453	7.89135	13.6055	20.2705	24.367
ENSG00000270607.1	AC009549.1	56.4045	24.5196	77.661	1.67528	2.02657e-07	5.96084e-07	20.1043	28.935	76.7741	83.8463	72.3626
ENSG00000260729.1	AC009690.1	30.3735	5.02608	47.2718	3.20695	0.0152843	0.0259455	10.0522	0	65.1122	51.5977	25.1054
ENSG00000269867.1	AC010326.3	35.0183	6.34131	54.1362	3.04262	3.6414e-08	1.13141e-07	10.0522	2.63045	63.1686	42.3838	56.8563
ENSG00000270804.1	AC010326.4	47.9934	11.503	72.3203	2.66166	5.20866e-10	1.83219e-09	11.1691	11.837	62.1967	65.4185	89.3456
ENSG00000285589.1	AC010422.8	80.5829	36.6438	109.876	1.57998	3.13754e-09	1.05048e-08	39.0917	34.1959	119.534	94.9029	115.189
ENSG00000251257.2	AC010457.1	15.9623	5.2244	23.1208	2.10894	0.00262018	0.0050154	7.81835	2.63045	18.4647	29.4844	21.4134
ENSG00000268750.7	AC010522.1	20.8308	11.4039	27.1154	1.23982	0.0164632	0.0277823	12.286	10.5218	29.1547	28.563	23.6286
ENSG00000131152.4	AC010531.1	8.98394	0	14.9732	6.06229	0.000272233	0.000595881	0	0	27.2111	7.3711	10.3375
ENSG00000261114.1	AC012181.1	25.2997	9.07092	36.119	1.98945	0.000351571	0.000760942	8.93525	9.20658	31.0984	50.6763	26.5822
ENSG00000261270.1	AC012181.2	10.8644	3.54904	15.7413	2.13127	0.00940912	0.0165318	4.46763	2.63045	14.5774	15.6636	16.9831
ENSG00000268049.1	AC012313.2	35.5573	11.1064	51.8579	2.18842	2.94373e-06	7.9011e-06	15.6367	6.57613	63.1686	45.148	47.2572
ENSG00000262712.1	AC012676.1	16.912	7.49471	23.1902	1.66088	0.00763685	0.0135828	4.46763	10.5218	22.352	22.1133	25.1054
ENSG00000280063.1	AC012676.5	17.1739	6.27865	24.4373	1.9825	0.00579031	0.0105393	3.35072	9.20658	37.9011	18.4278	16.9831
ENSG00000264112.1	AC015813.1	130.958	53.7679	182.418	1.75825	3.39359e-16	1.62647e-15	53.6115	53.9242	203.111	182.435	161.708
ENSG00000266086.3	AC015813.2	87.7326	12.2233	138.072	3.452	1.70244e-18	8.94518e-18	17.8705	6.57613	144.802	163.086	106.329
ENSG00000278600.1	AC015871.3	16.3965	7.95401	22.0249	1.47812	0.0221549	0.0365086	6.70144	9.20658	15.5492	31.3272	19.1982
ENSG00000267605.7	AC016590.1	6.50139	1.11691	10.091	3.08992	0.0181482	0.030404	2.23381	0	7.77459	12.8994	9.59912
ENSG00000286104.1	AC016629.3	35.4851	5.2609	55.6345	3.42974	0.00809225	0.0143417	0	10.5218	42.7603	52.5191	71.6242
ENSG00000270820.6	AC016727.1	47.5546	24.123	63.1757	1.38943	3.52225e-05	8.51572e-05	24.5719	23.6741	56.3658	68.1827	64.9786
ENSG00000226380.9	AC016831.1	17.31	4.86426	25.6072	2.39989	0.000357191	0.000772568	4.46763	5.2609	27.2111	26.7202	22.8902
ENSG00000273275.1	AC017083.2	11.4339	0	19.0564	6.40947	4.58026e-05	0.000109254	0	0	25.2674	19.3491	12.5527
ENSG00000224376.1	AC017104.1	14.7201	6.53962	20.1737	1.61661	0.0136186	0.0233197	7.81835	5.2609	18.4647	18.4278	23.6286
ENSG00000260465.1	AC018557.1	10.043	0	16.7384	6.23308	0.000136857	0.000310801	0	0	22.352	6.44971	21.4134
ENSG00000273361.1	AC021016.2	19.0602	3.28806	29.575	3.25536	0.000206136	0.00045813	0	6.57613	14.5774	35.0127	39.1349
ENSG00000186019.11	AC021092.1	86.0604	50.4798	109.781	1.11203	4.38542e-06	1.15702e-05	53.6115	47.3481	114.675	117.938	96.7296
ENSG00000267169.2	AC022098.1	24.3702	9.72853	34.1313	1.82099	0.000860305	0.00176398	8.93525	10.5218	22.352	42.3838	37.6581
ENSG00000260276.2	AC022167.2	100.139	17.8444	155.002	3.09779	3.76501e-23	2.32056e-22	21.2212	14.4675	156.464	166.771	141.772
ENSG00000287625.1	AC022210.1	6.75431	1.21607	10.4465	3.10081	0.0167818	0.0282891	1.11691	1.31523	10.6901	14.7422	5.90715
ENSG00000287200.1	AC022506.2	61.6466	8.31414	97.2016	3.5284	1.15405e-15	5.38454e-15	10.0522	6.57613	90.3797	98.5885	102.637
ENSG00000269044.2	AC024075.2	38.5867	21.5291	49.9585	1.22647	0.0012198	0.0024502	16.7536	26.3045	56.3658	46.9908	46.5188
ENSG00000267248.3	AC025048.2	49.0312	21.0333	67.6964	1.68385	1.2876e-06	3.56402e-06	22.3381	19.7284	58.3095	74.6324	70.1474
ENSG00000254485.5	AC026191.1	5.88545	1.11691	9.06448	2.94168	0.0272232	0.0441793	2.23381	0	8.74642	7.3711	11.0759
ENSG00000263171.1	AC026954.3	13.0824	1.67536	20.6871	3.54154	0.000601866	0.00126	3.35072	0	12.6337	25.7989	23.6286
ENSG00000276075.1	AC027682.6	12.2054	4.7651	17.1655	1.83955	0.0161462	0.0272964	5.58453	3.94568	11.6619	22.1133	17.7214
ENSG00000267390.1	AC036176.1	33.3897	15.2504	45.4825	1.59019	0.000702996	0.00146116	13.4029	17.0979	28.1829	54.3619	53.9027
ENSG00000253200.1	AC037459.2	78.7154	42.8233	102.644	1.25871	7.71389e-07	2.17282e-06	43.5594	42.0872	96.2106	114.252	97.468
ENSG00000253210.2	AC040970.1	24.5466	13.0792	32.1916	1.28717	0.00672454	0.0120836	15.6367	10.5218	31.0984	32.2486	33.2277
ENSG00000248932.6	AC046134.2	32.6183	15.6105	43.9569	1.4842	0.000410984	0.00088129	16.7536	14.4675	50.5349	41.4624	39.8733
ENSG00000267022.1	AC067968.1	36.0814	14.9529	50.167	1.74364	3.50333e-05	8.47453e-05	16.7536	13.1523	46.6476	43.3052	60.5483
ENSG00000287763.1	AC068279.2	5.29347	0	8.82246	5.30144	0.00205203	0.00399299	0	0	12.6337	6.44971	7.38394
ENSG00000237161.4	AC068446.1	5.97381	0	9.95635	5.47688	0.00103706	0.0021044	0	0	10.6901	11.0567	8.12233
ENSG00000284946.1	AC068831.6	10.7078	2.63045	16.0927	2.6967	0.00537759	0.00983775	0	5.2609	13.6055	18.4278	16.2447
ENSG00000279861.1	AC073548.1	8.53229	1.11691	13.4759	3.51649	0.00604519	0.0109646	2.23381	0	7.77459	11.978	20.675
ENSG00000227158.1	AC073621.1	29.0985	0.657613	48.0592	6.31415	1.40471e-05	3.53287e-05	0	1.31523	45.6757	42.3838	56.1179
ENSG00000144785.8	AC073896.1	117.863	43.2096	167.632	1.95216	0.00530348	0.0097125	61.4299	24.9893	84.5487	184.278	234.071
ENSG00000273151.1	AC073957.3	86.6782	26.8161	126.586	2.22239	6.58999e-14	2.84911e-13	31.2734	22.3588	151.605	111.488	116.666
ENSG00000234072.1	AC074117.1	35.6639	17.8444	47.5436	1.40313	0.00055894	0.00117546	21.2212	14.4675	51.5067	38.6983	52.426
ENSG00000253214.2	AC079209.1	10.922	1.77452	17.0203	3.23724	0.00133233	0.00266373	2.23381	1.31523	17.4928	16.585	16.9831
ENSG00000280241.4	AC079298.3	19.414	6.53962	27.9969	2.08575	0.000642114	0.00134064	7.81835	5.2609	30.1266	22.1133	31.7509
ENSG00000272941.1	AC083862.1	24.7151	6.89976	36.592	2.35699	9.03342e-05	0.000208915	11.1691	2.63045	47.6194	30.4058	31.7509
ENSG00000261879.7	AC087500.1	24.546	14.7911	31.0493	1.08309	0.0234014	0.0383872	11.1691	18.4132	29.1547	35.9341	28.059
ENSG00000283375.1	AC087521.4	15.3484	5.2609	22.0733	2.13088	0.0119135	0.0205889	0	10.5218	14.5774	25.7989	25.8438
ENSG00000262580.5	AC087741.1	56.1542	20.8714	79.676	1.94362	1.56854e-08	5.01228e-08	16.7536	24.9893	90.3797	79.2393	69.409
ENSG00000257732.1	AC089983.1	109.726	50.5163	149.199	1.57308	8.32562e-12	3.23241e-11	45.7932	55.2395	129.253	156.636	161.708
ENSG00000253227.2	AC090192.2	6.59107	0.558453	10.6128	4.14853	0.0114037	0.0197541	1.11691	0	5.83095	11.978	14.0295
ENSG00000262533.1	AC090617.3	30.8654	17.0876	40.0506	1.2069	0.00549128	0.0100327	22.3381	11.837	37.9011	46.0694	36.1813
ENSG00000239969.5	AC091390.3	6.84077	0	11.4013	5.66545	0.00133247	0.00266373	0	0	23.3238	6.44971	4.43036
ENSG00000236393.2	AC091806.1	41.5669	23.0061	53.9407	1.2335	0.000479359	0.00101721	22.3381	23.6741	55.394	48.8336	57.5947
ENSG00000275740.1	AC091959.1	82.3906	48.319	105.105	1.13213	0.000775454	0.00160209	33.5072	63.1308	82.6051	145.579	87.1305
ENSG00000275367.1	AC092111.1	45.862	21.8892	61.8438	1.49804	3.69192e-05	8.91204e-05	20.1043	23.6741	65.1122	70.9469	49.4724
ENSG00000230733.2	AC092171.2	29.9156	14.17	40.4127	1.54922	0.00904195	0.015921	3.35072	24.9893	30.1266	46.0694	45.042
ENSG00000234432.4	AC092171.3	25.0696	10.5845	34.7264	1.73977	0.00072187	0.00149858	6.70144	14.4675	32.0702	39.6197	32.4893
ENSG00000267309.1	AC092295.2	15.3967	4.66595	22.5506	2.23414	0.00184013	0.00360465	6.70144	2.63045	28.1829	20.2705	19.1982
ENSG00000260643.2	AC092718.2	18.6388	5.06258	27.6896	2.49055	0.000324768	0.000705295	2.23381	7.89135	34.0138	27.6416	21.4134
ENSG00000243176.6	AC092944.1	33.0155	19.9163	41.7483	1.07074	0.00637678	0.0115148	20.1043	19.7284	39.8448	39.6197	45.7804
ENSG00000259976.3	AC093010.2	136.879	81.5391	173.772	1.08935	3.73689e-07	1.07647e-06	81.5342	81.544	210.886	142.815	167.615
ENSG00000272335.1	AC093297.2	33.0893	20.3756	41.5651	1.01849	0.00935566	0.0164427	22.3381	18.4132	43.7321	43.3052	37.6581
ENSG00000170846.17	AC093323.1	244.4	132.207	319.196	1.26132	1.1845e-16	5.78622e-16	155.25	109.164	310.012	316.036	331.539
ENSG00000260272.1	AC093525.2	37.225	0	62.0417	8.11717	3.55635e-08	1.1061e-07	0	0	62.1967	70.0255	53.9027
ENSG00000261613.2	AC093525.6	63.1692	27.0771	87.2306	1.66918	1.95552e-07	5.76061e-07	35.741	18.4132	78.7178	84.7677	98.2064
ENSG00000269937.1	AC093525.7	50.871	16.6283	73.6994	2.12583	7.84121e-08	2.37908e-07	20.1043	13.1523	93.2951	70.9469	56.8563
ENSG00000272760.1	AC093726.1	11.3455	1.11691	18.1645	3.92255	0.00094759	0.00193349	2.23381	0	23.3238	15.6636	15.5063
ENSG00000224536.2	AC096677.1	45.8528	7.39556	71.491	3.29711	1.70258e-11	6.51554e-11	5.58453	9.20658	78.7178	62.6544	73.101
ENSG00000272851.1	AC096772.1	11.7983	2.63045	17.9102	2.85709	0.00247528	0.00475331	0	5.2609	15.5492	17.5064	20.675
ENSG00000273486.1	AC096992.2	8.89365	1.77452	13.6397	2.91741	0.00615026	0.0111291	2.23381	1.31523	17.4928	10.1353	13.2911
ENSG00000270194.1	AC097359.2	67.9376	23.3036	97.6937	2.08474	2.1032e-11	8.00517e-11	18.9874	27.6197	101.07	89.3746	102.637
ENSG00000285569.2	AC099344.3	47.64	28.9873	60.0751	1.05461	0.00173405	0.00340979	29.0396	28.935	47.6194	69.1041	63.5019
ENSG00000282021.1	AC100810.3	9.77143	3.54904	13.9197	1.958	0.025308	0.0412699	4.46763	2.63045	8.74642	17.5064	15.5063
ENSG00000273230.1	AC102953.2	58.5419	31.6177	76.4913	1.2767	2.19067e-05	5.40087e-05	29.0396	34.1959	76.7741	84.7677	67.9322
ENSG00000254064.1	AC105206.2	12.7622	2.33297	19.715	3.04252	0.000724553	0.00150374	3.35072	1.31523	20.4083	16.585	22.1518
ENSG00000170089.15	AC106795.1	311.878	109.138	447.037	2.01977	2.12396e-42	2.1709e-41	126.21	92.0658	460.645	462.537	417.931
ENSG00000284948.1	AC107959.4	27.0399	1.77452	43.8835	4.60449	3.47262e-07	1.0022e-06	2.23381	1.31523	38.873	43.3052	49.4724
ENSG00000259366.1	AC108449.2	18.4512	9.62937	24.3325	1.34113	0.0195401	0.0325424	10.0522	9.20658	24.2956	18.4278	30.2741
ENSG00000244675.2	AC108676.1	16.3326	8.61162	21.48	1.33637	0.0254571	0.0415	6.70144	10.5218	19.4365	22.1133	22.8902
ENSG00000260526.1	AC109347.1	6.72351	0.558453	10.8336	4.16455	0.00960896	0.0168505	1.11691	0	11.6619	11.978	8.86072
ENSG00000260404.3	AC110079.1	71.4079	31.3202	98.133	1.64365	6.95548e-08	2.11864e-07	32.3903	30.2502	119.534	77.3966	97.468
ENSG00000287257.1	AC111182.2	5.21406	0	8.6901	5.29141	0.00225615	0.00436225	0	0	4.85912	10.1353	11.0759
ENSG00000285943.1	AC112128.1	75.8953	33.1313	104.405	1.6753	4.49198e-08	1.38541e-07	26.8058	39.4568	90.3797	92.1388	130.696
ENSG00000274425.1	AC114271.1	32.9072	12.8809	46.2581	1.81237	0.000237951	0.000525071	17.8705	7.89135	52.4785	55.2833	31.0125
ENSG00000271741.1	AC114490.1	162.838	65.7302	227.577	1.78983	1.816e-22	1.09533e-21	67.0144	64.446	226.435	230.347	225.948
ENSG00000278934.1	AC117489.1	10.7427	2.33297	16.3491	2.76805	0.00338229	0.00637264	3.35072	1.31523	21.3801	12.8994	14.7679
ENSG00000279759.1	AC118344.2	32.4521	10.1878	47.295	2.20058	1.59022e-05	3.97427e-05	11.1691	9.20658	66.084	39.6197	36.1813
ENSG00000262526.2	AC120057.2	405.872	199.853	543.218	1.44114	0.0178133	0.0298817	274.759	124.946	802.727	360.263	466.665
ENSG00000247735.2	AC120114.1	10.5165	3.6482	15.0954	2.04672	0.0154904	0.0262608	3.35072	3.94568	16.521	18.4278	10.3375
ENSG00000260196.1	AC124798.1	47.6747	11.764	71.6152	2.57465	3.7043e-10	1.31376e-09	15.6367	7.89135	71.915	76.4752	66.4554
ENSG00000279148.1	AC126474.1	5.17618	0	8.62696	5.27508	0.00247388	0.00475122	0	0	4.85912	12.8994	8.12233
ENSG00000280088.1	AC126474.2	29.8017	16.8266	38.4518	1.18398	0.00560078	0.0102159	17.8705	15.7827	37.9011	44.2266	33.2277
ENSG00000278212.2	AC134878.2	79.8815	46.7325	101.981	1.11751	4.98012e-06	1.30747e-05	51.3777	42.0872	103.985	102.274	99.6831
ENSG00000267681.1	AC135721.1	13.3152	5.98117	18.2046	1.59625	0.0188403	0.0314546	6.70144	5.2609	18.4647	18.4278	17.7214
ENSG00000215154.6	AC141586.1	61.0454	15.3496	91.5093	2.59725	6.42662e-13	2.65974e-12	12.286	18.4132	84.5487	90.296	99.6831
ENSG00000256546.2	AC156455.1	30.6304	14.3318	41.4961	1.5592	0.00241391	0.00464351	8.93525	19.7284	25.2674	53.4405	45.7804
ENSG00000277701.5	AC159540.2	30.805	19.0604	38.6348	1.00835	0.0167948	0.0283072	22.3381	15.7827	44.7039	31.3272	39.8733
ENSG00000236263.1	AC234582.1	7.28523	1.67536	11.0251	2.65045	0.0284672	0.0460102	3.35072	0	4.85912	15.6636	12.5527
ENSG00000261101.2	AC234775.2	10.9533	3.6482	15.8234	2.13252	0.0154957	0.026264	3.35072	3.94568	15.5492	8.29249	23.6286
ENSG00000287222.1	AC234917.3	18.9945	10.287	24.7996	1.27553	0.0209625	0.0347061	10.0522	10.5218	19.4365	27.6416	27.3206
ENSG00000260836.2	AC245033.1	9.6001	0	16.0002	6.17229	0.000102643	0.000235973	0	0	11.6619	15.6636	20.675
ENSG00000278540.5	ACACA	810.543	502.799	1015.71	1.01258	4.7166e-35	4.09892e-34	521.595	484.003	1042.77	964.693	1039.66
ENSG00000177646.20	ACAD9	451.911	254.742	583.357	1.19443	9.54343e-29	6.92301e-28	249.07	260.415	606.418	597.981	545.673
ENSG00000075239.14	ACAT1	705.714	437.178	884.737	1.01641	2.68046e-33	2.21042e-32	431.126	443.231	896.022	911.252	846.938
ENSG00000182827.9	ACBD3	1704.82	818.11	2295.96	1.48706	6.7642e-133	2.29346e-131	836.563	799.657	2322.66	2273.98	2291.24
ENSG00000159640.17	ACE	36.4853	20.8349	46.9189	1.15689	0.00226602	0.00438024	24.5719	17.0979	47.6194	48.8336	44.3036
ENSG00000162390.18	ACOT11	12.9176	1.21607	20.7185	4.09972	0.000431413	0.000922289	1.11691	1.31523	14.5774	27.6416	19.9366
ENSG00000161533.12	ACOX1	548.178	339.721	687.149	1.01395	1.59388e-26	1.08226e-25	358.527	320.915	663.756	687.355	710.335
ENSG00000102575.13	ACP5	200.938	3.90917	332.29	6.29946	1.1363e-29	8.48934e-29	7.81835	0	324.589	332.621	339.661
ENSG00000151726.15	ACSL1	589.505	252.211	814.368	1.693	1.49444e-68	2.47926e-67	247.953	256.469	798.84	820.956	823.309
ENSG00000288649.1	ACTL10	39.3936	15.6732	55.2072	1.7833	2.63709e-05	6.46445e-05	23.455	7.89135	50.5349	58.9688	56.1179
ENSG00000114739.14	ACVR2B	66.7703	34.5091	88.2777	1.3539	1.28966e-06	3.56908e-06	33.5072	35.5111	97.1824	85.6891	81.9617
ENSG00000229589.1	ACVR2B-AS1	11.8918	4.66595	16.709	1.81557	0.0179781	0.030145	6.70144	2.63045	13.6055	16.585	19.9366
ENSG00000151694.14	ADAM17	921.552	431.756	1248.08	1.53219	4.37828e-86	9.35745e-85	425.541	437.97	1274.06	1228.21	1241.98
ENSG00000161912.18	ADCY10P1	17.3997	3.74736	26.5012	2.85552	0.000110552	0.000253478	2.23381	5.2609	29.1547	26.7202	23.6286
ENSG00000121281.13	ADCY7	407.781	222.196	531.504	1.25306	9.92821e-30	7.42459e-29	237.901	206.49	542.278	516.899	535.335
ENSG00000156110.15	ADK	561.748	339.669	709.8	1.06645	5.40882e-29	3.96076e-28	329.487	349.85	669.587	736.189	723.626
ENSG00000170425.3	ADORA2B	59.1797	22.051	83.9322	1.91922	5.67523e-09	1.86823e-08	25.6889	18.4132	72.8868	86.6104	92.2992
ENSG00000184160.8	ADRA2C	27.4416	6.47697	41.4181	2.74739	7.66641e-06	1.97787e-05	1.11691	11.837	34.9857	44.2266	45.042
ENSG00000255310.2	AF131215.5	30.341	13.2776	41.7166	1.64894	0.000176105	0.000394841	13.4029	13.1523	41.7884	44.2266	39.1349
ENSG00000130396.20	AFDN	463.522	268.641	593.442	1.1421	7.25091e-30	5.44609e-29	270.291	266.991	609.334	586.924	584.069
ENSG00000119844.15	AFTPH	626.736	355.566	807.515	1.18195	8.97466e-40	8.67513e-39	365.229	345.904	779.403	830.17	812.971
ENSG00000116771.6	AGMAT	25.8855	10.548	36.1105	1.74579	0.000671757	0.00139961	14.5198	6.57613	34.0138	43.3052	31.0125
ENSG00000126070.20	AGO3	275.327	168.203	346.743	1.03811	1.29047e-12	5.25378e-12	172.004	164.403	390.673	344.599	304.957
ENSG00000155189.12	AGPAT5	334.811	177.77	439.505	1.30693	1.34353e-25	8.89658e-25	175.354	180.186	464.532	407.253	446.728
ENSG00000153207.16	AHCTF1	997.488	612.083	1254.42	1.03443	3.47179e-48	4.02961e-47	616.533	607.634	1242.96	1279.81	1240.5
ENSG00000158467.16	AHCYL2	293.135	126.57	404.179	1.68377	3.88814e-33	3.18765e-32	115.041	138.099	408.166	380.533	423.838
ENSG00000135541.22	AHI1	584.067	195.353	843.21	2.1105	3.01376e-88	6.5865e-87	192.108	198.599	878.529	818.192	832.908
ENSG00000185567.7	AHNAK2	224.51	125.02	290.837	1.21908	4.26601e-17	2.12341e-16	125.094	124.946	294.463	278.259	299.788
ENSG00000155085.15	AK9	134.422	77.99	172.043	1.13751	1.92634e-08	6.11526e-08	77.0666	78.9135	200.196	163.086	152.847
ENSG00000023516.9	AKAP11	1348.38	802.849	1712.07	1.08871	5.25978e-54	6.90096e-53	845.498	760.2	1780.38	1694.43	1661.39
ENSG00000127914.19	AKAP9	1210.85	726.723	1533.61	1.07274	5.4062e-36	4.79228e-35	791.887	661.558	1636.55	1492.65	1471.62
ENSG00000106948.17	AKNA	348.29	203.568	444.771	1.13137	6.12227e-18	3.14433e-17	203.277	203.86	422.744	410.939	500.631
ENSG00000117448.14	AKR1A1	877.212	441.761	1167.51	1.39743	1.50811e-59	2.15972e-58	475.802	407.72	1121.49	1214.39	1166.66
ENSG00000187134.14	AKR1C1	396.093	185.74	536.328	1.52071	3.26099e-28	2.33391e-27	218.914	152.566	539.362	496.628	572.993
ENSG00000204673.11	AKT1S1	1099.15	684.436	1375.63	1.01079	2.72317e-37	2.4953e-36	653.39	715.483	1371.24	1297.31	1458.33
ENSG00000166971.17	AKTIP	640.977	396.86	803.721	1.02047	1.77069e-28	1.27673e-27	374.164	419.557	795.924	845.834	769.406
ENSG00000272316.1	AL021368.2	55.9045	31.0228	72.4924	1.21487	9.67375e-05	0.00022319	35.741	26.3045	79.6896	61.733	76.0545
ENSG00000272720.1	AL022322.1	15.3745	7.55737	20.586	1.41825	0.0287298	0.0464056	11.1691	3.94568	17.4928	22.1133	22.1518
ENSG00000272582.1	AL031587.3	10.0403	2.43213	15.1124	2.64026	0.0108938	0.0189386	2.23381	2.63045	6.80277	26.7202	11.8143
ENSG00000278948.1	AL031587.5	280.131	117.165	388.776	1.72812	1.67092e-33	1.38677e-32	117.275	117.055	417.884	377.769	370.674
ENSG00000272345.1	AL031775.1	14.1501	4.40497	20.6468	2.25468	0.00562924	0.010263	2.23381	6.57613	21.3801	29.4844	11.0759
ENSG00000260920.2	AL031985.3	80.9901	23.8255	119.1	2.30424	4.19524e-15	1.91304e-14	27.9227	19.7284	127.309	117.016	112.974
ENSG00000277938.1	AL035252.3	5.32249	0.558453	8.49851	3.81585	0.0224818	0.037004	1.11691	0	11.6619	6.44971	7.38394
ENSG00000287825.1	AL035587.2	5.62168	0	9.36947	5.38953	0.00143872	0.00286027	0	0	8.74642	11.978	7.38394
ENSG00000281091.3	AL117327.1	17.1109	1.31523	27.6413	4.50071	5.43462e-05	0.000128662	0	2.63045	31.0984	26.7202	25.1054
ENSG00000260708.1	AL118516.1	17.2006	7.39556	23.7372	1.703	0.00608829	0.011035	5.58453	9.20658	18.4647	27.6416	25.1054
ENSG00000258790.1	AL121594.1	97.8085	34.8693	139.768	1.99646	1.27239e-15	5.92242e-15	36.8579	32.8806	138.971	147.422	132.911
ENSG00000258744.2	AL132800.1	49.1794	24.7806	65.4452	1.4015	3.1814e-05	7.73753e-05	24.5719	24.9893	73.8586	55.2833	67.1938
ENSG00000276805.2	AL133216.2	41.5971	25.7984	52.1297	1.01227	0.00346688	0.00651854	27.9227	23.6741	46.6476	54.3619	55.3795
ENSG00000260285.1	AL133367.1	66.7879	17.7817	99.4586	2.50174	8.61511e-14	3.71015e-13	14.5198	21.0436	100.098	94.9029	103.375
ENSG00000273893.1	AL133520.1	11.2486	4.20665	15.9433	1.92185	0.0139731	0.0238872	4.46763	3.94568	15.5492	13.8208	18.4598
ENSG00000286964.1	AL136169.1	29.9027	17.3224	38.2896	1.15368	0.0163886	0.0276746	12.286	22.3588	53.4503	30.4058	31.0125
ENSG00000237596.7	AL138828.1	15.8843	0.558453	26.1016	5.4353	0.000265916	0.00058296	1.11691	0	27.2111	23.0347	28.059
ENSG00000272449.2	AL139246.5	20.024	1.31523	32.4965	4.73707	1.66135e-05	4.14134e-05	0	2.63045	31.0984	36.8555	29.5357
ENSG00000240731.1	AL139287.1	15.8954	7.95401	21.1897	1.42727	0.0190655	0.0318168	6.70144	9.20658	20.4083	20.2705	22.8902
ENSG00000259049.1	AL139317.3	15.8833	6.37781	22.2203	1.8378	0.0214489	0.0354243	2.23381	10.5218	30.1266	9.21388	27.3206
ENSG00000231811.3	AL159166.1	5.11102	0.657613	8.07995	3.72736	0.0251814	0.0410809	0	1.31523	8.74642	7.3711	8.12233
ENSG00000269934.3	AL353593.1	36.7683	15.1147	51.204	1.72723	8.4705e-05	0.000196365	22.3381	7.89135	46.6476	58.9688	47.9956
ENSG00000165121.11	AL353743.1	26.2725	11.7014	35.9866	1.64168	0.000780295	0.00161059	8.93525	14.4675	30.1266	38.6983	39.1349
ENSG00000280077.1	AL353763.2	74.9965	32.9329	103.039	1.65206	1.95932e-09	6.64909e-09	29.0396	36.8263	104.957	109.645	94.5144
ENSG00000259994.1	AL353796.1	19.9974	3.54904	30.963	3.10273	1.49086e-05	3.73618e-05	4.46763	2.63045	31.0984	28.563	33.2277
ENSG00000225339.4	AL354740.1	59.9547	20.501	86.2572	2.06406	0.0285186	0.0460788	35.741	5.2609	50.5349	100.431	107.805
ENSG00000277496.1	AL357033.4	5.41336	0	9.02226	5.32917	0.00208495	0.00405145	0	0	13.6055	8.29249	5.16876
ENSG00000272068.1	AL365181.2	6.13408	0.558453	9.85117	4.03077	0.013262	0.0227544	1.11691	0	11.6619	8.29249	9.59912
ENSG00000272405.1	AL365181.3	260.605	3.1889	432.215	7.1587	5.2214e-28	3.71127e-27	1.11691	5.2609	448.983	431.209	416.454
ENSG00000283162.1	AL390726.5	29.293	16.2682	37.9762	1.21349	0.00747423	0.0133195	16.7536	15.7827	49.563	34.0913	30.2741
ENSG00000286078.1	AL391056.2	56.7145	27.7347	76.0344	1.43428	7.60496e-05	0.000177335	35.741	19.7284	100.098	60.8116	67.1938
ENSG00000224934.5	AL391684.1	20.1752	4.66595	30.5148	2.67169	0.000115098	0.000263277	6.70144	2.63045	40.8166	21.1919	29.5357
ENSG00000269896.2	AL513477.1	22.084	5.52188	33.1254	2.60124	3.33094e-05	8.07966e-05	4.46763	6.57613	38.873	25.7989	34.7045
ENSG00000256029.6	AL590560.2	9.55269	1.21607	15.1104	3.65661	0.00418997	0.00777435	1.11691	1.31523	9.71824	8.29249	27.3206
ENSG00000272668.2	AL590560.3	25.5403	6.53962	38.2075	2.52254	3.84838e-05	9.2706e-05	7.81835	5.2609	52.4785	37.7769	24.367
ENSG00000229953.1	AL590666.2	51.7437	0	86.2394	8.5963	4.42044e-09	1.46481e-08	0	0	96.2106	70.9469	91.5608
ENSG00000273748.1	AL592183.1	35.6765	15.6732	49.012	1.61404	0.000231123	0.000510804	23.455	7.89135	47.6194	46.9908	52.426
ENSG00000229261.1	AL596223.1	8.51258	0.657613	13.7492	4.49459	0.00480011	0.00885028	0	1.31523	9.71824	21.1919	10.3375
ENSG00000261534.1	AL596244.1	80.8329	45.8139	104.179	1.18289	1.95032e-06	5.31578e-06	46.9101	44.7177	113.703	93.9816	104.852
ENSG00000228327.3	AL669831.1	134.645	67.5516	179.374	1.41596	0.0016474	0.00325177	39.0917	96.0114	197.28	169.535	171.307
ENSG00000273192.1	AL671710.1	12.9408	0	21.568	6.59201	5.51405e-05	0.000130443	0	0	38.873	7.3711	18.4598
ENSG00000023330.15	ALAS1	553.022	306.548	717.338	1.23385	1.68134e-29	1.24951e-28	280.344	332.752	659.869	720.525	771.621
ENSG00000144908.14	ALDH1L1	13.597	1.87368	21.4125	3.55276	0.000309427	0.000673964	1.11691	2.63045	26.2393	16.585	21.4134
ENSG00000253710.5	ALG11	1040.57	588.325	1342.06	1.19178	2.57849e-12	1.0308e-11	513.777	662.874	1402.34	1191.35	1432.48
ENSG00000238278.3	ALG1L6P	5.33189	0.657613	8.44808	3.78951	0.0220654	0.0363688	0	1.31523	8.74642	9.21388	7.38394
ENSG00000119523.10	ALG2	806.87	369.502	1098.45	1.5699	3.90453e-76	7.28047e-75	378.631	360.372	1066.09	1141.6	1087.65
ENSG00000214160.10	ALG3	416.744	238.213	535.764	1.1737	2.67553e-27	1.85658e-26	227.849	248.578	539.362	514.134	553.795
ENSG00000091542.9	ALKBH5	2580.38	1063.84	3591.4	1.75781	2.61403e-217	1.66001e-215	1024.2	1103.47	3589.92	3552.87	3631.42
ENSG00000116127.19	ALMS1	407.372	123.767	596.442	2.26147	1.40134e-65	2.21795e-64	131.795	115.74	637.517	579.553	572.255
ENSG00000162066.16	AMDHD2	199.684	82.7916	277.613	1.75339	3.55086e-25	2.31861e-24	74.8328	90.7505	290.575	261.674	280.59
ENSG00000164162.14	ANAPC10	91.5278	54.0289	116.527	1.09976	1.972e-06	5.37299e-06	58.0792	49.9786	124.393	118.859	106.329
ENSG00000231259.5	ANAPC1P2	24.6992	5.02608	37.8146	2.88361	0.0185841	0.0310503	10.0522	0	35.9575	25.7989	51.6876
ENSG00000214274.10	ANG	38.7889	18.9613	52.0073	1.43432	0.000270578	0.00059251	23.455	14.4675	61.2249	49.7549	45.042
ENSG00000145362.20	ANK2	558.822	324.924	714.753	1.14485	3.96866e-20	2.21921e-19	288.162	361.687	672.502	662.478	809.279
ENSG00000131503.21	ANKHD1	700.969	255.974	997.632	1.95638	1.62222e-70	2.78056e-69	287.045	224.904	937.81	982.199	1072.89
ENSG00000152766.6	ANKRD22	31.5301	0	52.5502	7.88185	1.06598e-07	3.20416e-07	0	0	60.2531	40.5411	56.8563
ENSG00000180777.14	ANKRD30B	34.653	6.93626	53.1308	2.98329	2.70778e-08	8.50709e-08	3.35072	10.5218	51.5067	59.8902	47.9956
ENSG00000137494.14	ANKRD42	263.271	153.522	336.436	1.13921	5.08718e-17	2.52566e-16	137.38	169.664	337.223	339.071	333.016
ENSG00000168096.15	ANKS3	303.356	144.117	409.516	1.50773	2.74913e-30	2.08915e-29	139.613	148.62	405.251	431.209	392.087
ENSG00000074855.11	ANO8	215.921	78.3867	307.611	1.98069	1.26249e-31	9.90998e-31	72.5989	84.1744	308.068	288.394	326.37
ENSG00000138772.13	ANXA3	26.8348	14.8903	34.7978	1.24034	0.00883367	0.0155755	10.0522	19.7284	39.8448	35.0127	29.5357
ENSG00000285864.1	AP000593.4	8.26743	1.97284	12.4638	2.73425	0.015049	0.0255909	0	3.94568	13.6055	15.6636	8.12233
ENSG00000280385.1	AP000648.4	40.812	21.7535	53.5177	1.27458	0.00104704	0.00212383	29.0396	14.4675	63.1686	47.9122	49.4724
ENSG00000285813.1	AP000813.1	7.90658	1.77452	11.9946	2.72507	0.0153167	0.0259948	2.23381	1.31523	18.4647	10.1353	7.38394
ENSG00000245498.7	AP000866.1	42.7123	24.5823	54.799	1.14988	0.000782784	0.00161529	26.8058	22.3588	55.394	54.3619	54.6411
ENSG00000278144.1	AP000944.4	34.8438	2.63045	56.3194	4.51987	3.14714e-08	9.82967e-08	0	5.2609	79.6896	44.2266	45.042
ENSG00000285816.1	AP000944.5	151.606	94.3574	189.771	1.01221	7.39597e-09	2.41569e-08	92.7033	96.0114	175.9	192.57	200.843
ENSG00000245008.4	AP001122.1	6.05011	0.657613	9.64511	3.98909	0.0147526	0.0251255	0	1.31523	6.80277	11.0567	11.0759
ENSG00000254837.2	AP001372.2	57.6303	34.2482	73.2185	1.10971	0.000288101	0.000629282	29.0396	39.4568	61.2249	80.1607	78.2697
ENSG00000254607.2	AP001783.1	10.4102	2.23381	15.8612	2.74515	0.00571995	0.0104185	4.46763	0	14.5774	21.1919	11.8143
ENSG00000254682.1	AP002387.1	21.7033	5.12524	32.7554	2.61728	5.86024e-05	0.00013819	8.93525	1.31523	28.1829	36.8555	33.2277
ENSG00000288675.1	AP006621.6	20.4643	9.62937	27.6877	1.52028	0.0046186	0.00852981	10.0522	9.20658	30.1266	24.8775	28.059
ENSG00000138660.12	AP1AR	449.176	190.463	621.652	1.71327	1.08635e-51	1.3564e-50	173.121	207.806	620.024	635.758	609.175
ENSG00000065000.19	AP3D1	2740.8	1554.68	3531.55	1.18468	3.90167e-125	1.25168e-123	1532.4	1576.96	3498.57	3543.66	3552.41
ENSG00000134262.13	AP4B1	213.101	125.714	271.359	1.11228	1.80601e-13	7.6732e-13	117.275	134.153	277.942	282.866	253.269
ENSG00000242802.9	AP5Z1	664.598	321.95	893.03	1.47095	6.50269e-61	9.54159e-60	321.669	322.23	916.43	889.139	873.52
ENSG00000011132.12	APBA3	260.148	117.264	355.404	1.59896	5.45756e-29	3.99456e-28	116.158	118.37	375.124	345.52	345.568
ENSG00000113108.20	APBB3	400.584	164.393	558.044	1.76076	2.26263e-42	2.30807e-41	163.068	165.718	607.39	560.204	506.538
ENSG00000110244.7	APOA4	6.83337	0	11.389	5.678	0.000538091	0.001135	0	0	11.6619	9.21388	13.2911
ENSG00000169083.18	AR	50.4631	20.574	70.3892	1.78225	5.66015e-07	1.61073e-06	20.1043	21.0436	57.3376	71.8682	81.9617
ENSG00000168374.11	ARF4	21740.6	4484.09	33244.9	2.88975	0	0	4564.8	4403.37	32511.4	34037	33186.4
ENSG00000271525.1	ARF4P1	6.25396	0.558453	10.051	4.05447	0.012901	0.0221645	1.11691	0	12.6337	10.1353	7.38394
ENSG00000124198.10	ARFGEF2	1599.61	781.393	2145.09	1.45429	5.4082e-110	1.47535e-108	813.108	749.678	2199.24	2085.1	2150.94
ENSG00000112379.9	ARFGEF3	184.421	1.87368	306.119	7.39957	1.3449e-18	7.093e-18	1.11691	2.63045	314.871	298.53	304.957
ENSG00000081181.8	ARG2	93.5554	43.5539	126.89	1.56777	7.11124e-09	2.32416e-08	27.9227	59.1851	122.45	125.309	132.911
ENSG00000147799.11	ARHGAP39	63.7245	28.6271	87.1227	1.61018	2.74981e-07	7.99706e-07	25.6889	31.5654	104.957	73.711	82.7001
ENSG00000076928.18	ARHGEF1	908.094	525.294	1163.29	1.14917	1.93295e-53	2.50009e-52	512.66	537.927	1161.33	1150.81	1177.74
ENSG00000214944.9	ARHGEF28	174.247	60.9025	249.81	2.04436	9.59283e-28	6.76563e-27	54.7284	67.0765	257.533	246.011	245.885
ENSG00000120805.14	ARL1	1924.18	868.475	2627.99	1.59818	7.41013e-163	3.19833e-161	854.434	882.516	2668.63	2610.29	2605.05
ENSG00000169379.17	ARL13B	144.529	67.6039	195.812	1.53211	5.46211e-16	2.593e-15	68.1313	67.0765	195.337	204.548	187.552
ENSG00000122644.13	ARL4A	167.933	81.9357	225.265	1.46735	7.70753e-15	3.47579e-14	77.0666	86.8049	219.632	199.941	256.223
ENSG00000165997.5	ARL5B	568.787	297.122	749.897	1.32885	6.40604e-41	6.35071e-40	327.254	266.991	749.276	743.56	756.854
ENSG00000177917.11	ARL6IP6	130.969	70.7301	171.128	1.28214	5.31451e-11	1.97573e-10	62.5468	78.9135	178.816	167.693	166.877
ENSG00000135931.18	ARMC9	1092.33	634.844	1397.32	1.13454	5.36383e-56	7.24607e-55	671.261	598.427	1387.76	1407.88	1396.3
ENSG00000126947.13	ARMCX1	734.42	241.465	1063.06	2.14096	1.66839e-112	4.7003e-111	235.667	247.262	1034.02	1080.79	1074.36
ENSG00000196440.11	ARMCX4	244.376	146.747	309.461	1.07788	2.544e-14	1.11986e-13	139.613	153.881	334.308	295.765	298.311
ENSG00000173409.14	ARV1	382.824	206.126	500.623	1.27648	2.08008e-29	1.53993e-28	218.914	193.338	490.771	499.392	511.707
ENSG00000188611.16	ASAH2	21.394	7.85485	30.4201	1.95182	0.000797685	0.00164211	7.81835	7.89135	38.873	22.1133	30.2741
ENSG00000204147.11	ASAH2B	183.063	91.8261	243.888	1.4095	5.6688e-18	2.9153e-17	91.5864	92.0658	241.984	246.011	243.67
ENSG00000065802.12	ASB1	1650.57	868.449	2171.98	1.32468	3.05396e-103	7.7703e-102	839.914	896.984	2140.93	2204.88	2170.14
ENSG00000161664.7	ASB16	19.0807	8.21498	26.3244	1.65478	0.00609451	0.0110424	11.1691	5.2609	33.042	19.3491	26.5822
ENSG00000267080.6	ASB16-AS1	139.387	57.4787	193.993	1.74385	1.59638e-17	8.07307e-17	63.6637	51.2938	193.393	209.155	179.43
ENSG00000100325.15	ASCC2	574.734	334.011	735.215	1.13802	2.61197e-35	2.28529e-34	333.955	334.067	757.051	713.154	735.44
ENSG00000213199.8	ASIC3	42.8226	12.1607	63.2639	2.38237	3.55067e-08	1.10455e-07	11.1691	13.1523	58.3095	78.318	53.1643
ENSG00000174939.11	ASPHD1	97.8031	12.0615	154.964	3.67887	3.21396e-24	2.04519e-23	12.286	11.837	161.323	160.321	143.248
ENSG00000130707.18	ASS1	406.811	186.841	553.458	1.57043	2.11605e-36	1.89527e-35	184.29	189.392	541.306	511.37	607.698
ENSG00000143970.17	ASXL2	675.398	325.029	908.976	1.47853	9.80375e-51	1.20276e-49	346.241	303.817	974.74	858.733	893.456
ENSG00000197785.14	ATAD3A	454.833	235.494	601.059	1.36127	7.06663e-31	5.44763e-30	206.628	264.36	561.714	614.566	626.896
ENSG00000162772.17	ATF3	957.143	508.081	1256.52	1.31003	2.57467e-49	3.05004e-48	476.919	539.242	1168.13	1342.46	1258.96
ENSG00000118217.7	ATF6	1611.09	795.333	2154.92	1.44125	5.44283e-79	1.05818e-77	744.977	845.69	2236.17	2014.15	2214.44
ENSG00000123395.14	ATG101	533.45	323.813	673.209	1.05335	2.89407e-21	1.68205e-20	345.124	302.502	604.475	730.66	684.491
ENSG00000168010.11	ATG16L2	192.8	70.2709	274.487	1.97293	3.46088e-25	2.26176e-24	60.313	80.2287	299.322	281.945	242.193
ENSG00000119787.14	ATL2	778.508	178.626	1178.43	2.7242	1.9501e-154	7.97279e-153	173.121	184.132	1184.65	1191.35	1159.28
ENSG00000149311.19	ATM	979.958	569.918	1253.32	1.13554	3.48727e-33	2.86052e-32	572.973	566.862	1400.4	1154.5	1205.06
ENSG00000068650.18	ATP11A	681.753	307.143	931.493	1.60912	4.29223e-61	6.31007e-60	273.642	340.643	921.289	914.017	959.173
ENSG00000105726.17	ATP13A1	875.845	533.284	1104.22	1.05195	8.68528e-40	8.40589e-39	511.543	555.025	1154.53	1066.05	1092.08
ENSG00000271614.1	ATP2B1-AS1	33.2271	13.1784	46.5929	1.81741	2.53018e-05	6.21121e-05	14.5198	11.837	42.7603	46.0694	50.9492
ENSG00000159199.14	ATP5MC1	406.981	203.73	542.482	1.40871	9.57467e-35	8.23762e-34	208.862	198.599	570.461	544.54	512.445
ENSG00000117410.14	ATP6V0B	806.149	436.286	1052.72	1.26931	3.73799e-48	4.32886e-47	441.178	431.394	1017.5	1126.86	1013.81
ENSG00000171130.18	ATP6V0E2	95.2476	47.3901	127.153	1.41621	8.92e-10	3.08585e-09	51.3777	43.4024	127.309	130.837	123.312
ENSG00000204934.10	ATP6V0E2-AS1	29.8324	3.54904	47.3546	3.71785	5.65325e-08	1.73425e-07	4.46763	2.63045	36.9293	49.7549	55.3795
ENSG00000155097.12	ATP6V1C1	930.857	449.094	1252.03	1.47468	1.02361e-75	1.89949e-74	474.685	423.503	1240.05	1288.1	1227.95
ENSG00000272899.4	ATP6V1FNB	13.8714	3.08974	21.0591	2.78848	0.000783123	0.00161578	2.23381	3.94568	27.2111	17.5064	18.4598
ENSG00000165240.20	ATP7A	357.935	196.669	465.446	1.24321	2.89101e-24	1.84406e-23	192.108	201.229	504.377	434.895	457.066
ENSG00000124406.16	ATP8A1	43.0618	13.1784	62.9841	2.24709	1.9372e-08	6.14722e-08	14.5198	11.837	63.1686	64.4971	61.2867
ENSG00000175054.16	ATR	471.108	280.494	598.184	1.08575	2.37949e-24	1.5223e-23	307.149	253.838	623.911	577.71	592.93
ENSG00000175756.13	AURKAIP1	724.874	408.499	935.791	1.20231	5.61331e-39	5.32955e-38	376.398	440.6	909.627	911.252	986.494
ENSG00000105778.19	AVL9	665.721	369.053	863.5	1.22824	2.90833e-44	3.10166e-43	354.059	384.046	868.811	883.611	838.077
ENSG00000119986.7	AVPI1	208.893	90.1507	288.055	1.67528	5.00322e-25	3.25052e-24	88.2356	92.0658	294.463	299.451	270.252
ENSG00000176597.12	B3GNT5	39.9	3.44988	64.2001	4.15614	1.81175e-10	6.53472e-10	5.58453	1.31523	62.1967	61.733	68.6706
ENSG00000027847.14	B4GALT7	410.628	237.269	526.201	1.15825	2.89811e-23	1.79338e-22	208.862	265.675	505.349	529.798	543.458
ENSG00000278768.2	BACE1-AS	76.1836	46.5341	95.9499	1.03283	6.45131e-05	0.000151689	53.6115	39.4568	89.4078	106.881	91.5608
ENSG00000166170.11	BAG5	825.43	465.445	1065.42	1.19747	4.09665e-47	4.64017e-46	453.464	477.427	1006.81	1101.06	1088.39
ENSG00000204463.13	BAG6	2318.45	1188.43	3071.8	1.36897	2.28226e-133	7.82381e-132	1220.78	1156.08	3052.5	3023.99	3138.91
ENSG00000007516.14	BAIAP3	25.1797	3.74736	39.468	3.43974	6.07136e-07	1.72332e-06	2.23381	5.2609	35.9575	39.6197	42.8268
ENSG00000119636.16	BBOF1	225.365	79.0808	322.887	2.04386	2.74343e-32	2.20256e-31	64.7806	93.381	310.984	344.599	313.079
ENSG00000132692.19	BCAN	6.16821	0.558453	9.90805	4.04596	0.0130067	0.0223435	1.11691	0	7.77459	10.1353	11.8143
ENSG00000171791.14	BCL2	48.3375	2.89143	78.6349	4.70889	1.55038e-11	5.95368e-11	4.46763	1.31523	86.4924	64.4971	84.9153
ENSG00000153094.24	BCL2L11	45.1427	28.0322	56.5497	1.01206	0.00744973	0.0132774	32.3903	23.6741	38.873	59.8902	70.8858
ENSG00000169668.11	BCRP2	19.5726	8.61162	26.8799	1.6535	0.00408352	0.00759138	6.70144	10.5218	26.2393	32.2486	22.1518
ENSG00000165626.17	BEND7	83.7361	51.6959	105.096	1.01993	1.68914e-05	4.20588e-05	54.7284	48.6633	109.816	97.6671	107.805
ENSG00000167995.17	BEST1	245.862	102.077	341.719	1.73693	1.67403e-31	1.3094e-30	109.457	94.6962	344.026	339.992	341.138
ENSG00000133134.12	BEX2	38.399	0	63.9984	8.16812	3.04204e-08	9.50907e-08	0	0	50.5349	72.7896	68.6706
ENSG00000102409.10	BEX4	215.078	51.9934	323.801	2.64206	1.25178e-40	1.22917e-39	51.3777	52.609	284.744	345.52	341.138
ENSG00000184515.11	BEX5	24.7423	0	41.2372	7.53711	4.55649e-07	1.30601e-06	0	0	34.9857	37.7769	50.9492
ENSG00000023445.16	BIRC3	61.2464	15.3131	91.8686	2.5566	2.13378e-12	8.56554e-12	20.1043	10.5218	102.042	82.0035	91.5608
ENSG00000115760.14	BIRC6	1419.97	852.802	1798.09	1.07637	8.86125e-40	8.57085e-39	830.979	874.625	1970.86	1677.85	1745.56
ENSG00000101197.13	BIRC7	69.0244	0.657613	114.602	7.56079	1.2146e-07	3.63395e-07	0	1.31523	123.422	120.702	99.6831
ENSG00000117475.14	BLZF1	1113.09	305.285	1651.63	2.4335	8.91326e-182	4.3706e-180	309.383	301.187	1680.28	1679.69	1594.93
ENSG00000125845.7	BMP2	16.0499	6.93626	22.1257	1.70625	0.0100268	0.0175217	3.35072	10.5218	21.3801	25.7989	19.1982
ENSG00000138696.11	BMPR1B	22.8422	6.34131	33.8427	2.36605	8.16598e-05	0.000189703	10.0522	2.63045	37.9011	34.0913	29.5357
ENSG00000242288.9	BMS1P4-AGAP5	10.654	0	17.7567	6.32479	6.67984e-05	0.000156753	0	0	13.6055	13.8208	25.8438
ENSG00000113734.18	BNIP1	135.152	80.2604	171.747	1.10216	3.45419e-09	1.15102e-08	73.7158	86.8049	172.013	177.828	165.4
ENSG00000038219.13	BOD1L1	1555	819.478	2045.34	1.31586	4.78289e-79	9.3104e-78	865.603	773.352	2137.04	1999.41	1999.57
ENSG00000136122.18	BORA	102.368	29.1856	151.157	2.38265	5.71671e-19	3.06932e-18	26.8058	31.5654	153.548	134.523	165.4
ENSG00000196544.8	BORCS6	104.889	60.939	134.189	1.15693	1.69393e-06	4.64145e-06	46.9101	74.9678	128.281	120.702	153.586
ENSG00000104331.9	BPNT2	2938.2	1453.23	3928.18	1.43278	4.00383e-166	1.79824e-164	1489.95	1416.5	3971.85	3965.65	3847.03
ENSG00000139618.17	BRCA2	107.5	22.051	164.466	2.88303	2.7271e-23	1.69026e-22	25.6889	18.4132	180.759	146.501	166.139
ENSG00000104221.13	BRF2	196.792	60.5788	287.601	2.26726	3.11038e-27	2.15446e-26	43.5594	77.5983	268.223	324.328	270.252
ENSG00000182685.7	BRICD5	25.0676	14.9529	31.8107	1.07967	0.0182128	0.0305056	16.7536	13.1523	34.0138	30.4058	31.0125
ENSG00000113460.13	BRIX1	339.999	167.88	454.746	1.44118	1.31281e-31	1.02998e-30	160.835	174.925	436.349	474.515	453.374
ENSG00000160469.17	BRSK1	205.16	117.337	263.709	1.17932	2.13244e-11	8.1125e-11	100.522	134.153	271.139	227.583	292.404
ENSG00000174672.16	BRSK2	10.6862	3.1889	15.6844	2.34799	0.0080536	0.0142783	1.11691	5.2609	18.4647	13.8208	14.7679
ENSG00000160058.19	BSDC1	1379.54	794.592	1769.51	1.15486	2.6055e-69	4.37402e-68	782.952	806.233	1811.48	1788.41	1708.64
ENSG00000237357.2	BX088651.4	5.29985	0.558453	8.46078	3.82028	0.022236	0.0366344	1.11691	0	5.83095	9.21388	10.3375
ENSG00000288258.1	BX470111.1	20.229	10.8454	26.4847	1.29615	0.0310352	0.0498125	11.1691	10.5218	13.6055	30.4058	35.4429
ENSG00000119965.13	C10orf88	246.997	147.504	313.326	1.09161	1.55454e-15	7.21184e-15	138.496	156.512	305.153	322.486	312.341
ENSG00000182919.15	C11orf54	205.367	121.669	261.165	1.1052	1.50863e-13	6.43086e-13	118.392	124.946	263.364	250.617	269.514
ENSG00000261652.3	C15orf65	41.5952	13.7369	60.1674	2.11789	1.16217e-07	3.47911e-07	15.6367	11.837	60.2531	62.6544	57.5947
ENSG00000166246.14	C16orf71	139.332	18.1418	220.126	3.60389	6.46548e-34	5.4536e-33	17.8705	18.4132	204.083	230.347	225.948
ENSG00000153446.16	C16orf89	11.4881	1.87368	17.8977	3.30284	0.00175975	0.00345682	1.11691	2.63045	14.5774	11.0567	28.059
ENSG00000205710.4	C17orf107	167.356	39.0133	252.917	2.70997	9.80537e-35	8.42674e-34	34.6241	43.4024	241.012	246.011	271.729
ENSG00000187624.9	C17orf97	45.5176	25.6	58.796	1.18944	0.000437734	0.000934778	30.1565	21.0436	55.394	58.9688	62.0251
ENSG00000177576.12	C18orf32	63.1951	37.0404	80.6315	1.13203	7.04582e-05	0.000165017	34.6241	39.4568	73.8586	76.4752	91.5608
ENSG00000160392.13	C19orf47	129.767	80.4222	162.664	1.02041	1.44834e-07	4.30253e-07	79.3004	81.544	143.83	171.378	172.784
ENSG00000167747.15	C19orf48	173.801	101.429	222.049	1.14221	4.66834e-11	1.73968e-10	87.1187	115.74	222.548	207.312	236.286
ENSG00000235034.7	C19orf81	10.1415	0.558453	16.5302	4.77971	0.00195866	0.0038209	1.11691	0	17.4928	12.8994	19.1982
ENSG00000106392.11	C1GALT1	349.935	203.036	447.868	1.13389	1.17055e-17	5.94483e-17	216.68	189.392	470.363	478.2	395.041
ENSG00000116922.14	C1orf109	221.574	109.509	296.284	1.43417	5.41208e-20	3.01438e-19	107.223	111.794	322.646	293.001	273.206
ENSG00000162817.7	C1orf115	17.5292	8.97176	23.2342	1.35573	0.0299008	0.0481614	10.0522	7.89135	25.2674	30.4058	14.0295
ENSG00000198912.12	C1orf174	377.502	147.567	530.793	1.84732	2.03084e-51	2.52146e-50	145.198	149.936	544.222	526.112	522.044
ENSG00000143443.10	C1orf56	59.284	34.8328	75.5848	1.09942	0.000889884	0.00182174	44.6763	24.9893	67.0559	93.9816	65.717
ENSG00000205930.10	C21orf62-AS1	7.81381	1.87368	11.7739	2.68794	0.0127345	0.0219026	1.11691	2.63045	12.6337	10.1353	12.5527
ENSG00000128346.11	C22orf23	111.993	32.8599	164.748	2.29827	6.88903e-16	3.25543e-15	44.6763	21.0436	151.605	197.177	145.464
ENSG00000184208.12	C22orf46	337.735	155.495	459.229	1.5716	1.49482e-32	1.20888e-31	137.38	173.61	432.462	483.729	461.496
ENSG00000172375.14	C2CD2L	421.058	147.729	603.277	2.02836	3.20805e-62	4.84019e-61	150.782	144.675	622.939	574.025	612.867
ENSG00000284308.1	C2orf81	43.5508	23.7629	56.7428	1.26749	0.000379118	0.000815893	21.2212	26.3045	57.3376	47.9122	64.9786
ENSG00000205129.8	C4orf47	34.8453	7.65653	52.9711	2.76329	4.92453e-08	1.5152e-07	10.0522	5.2609	45.6757	60.8116	52.426
ENSG00000197405.8	C5AR1	78.2975	37.4997	105.496	1.49601	1.23561e-08	3.97795e-08	36.8579	38.1415	107.872	94.9029	113.713
ENSG00000205765.9	C5orf51	641.203	360.133	828.582	1.20012	2.02393e-42	2.07002e-41	373.047	347.219	827.994	814.507	843.246
ENSG00000112308.13	C6orf62	2751.12	1705.36	3448.3	1.01565	1.18655e-69	2.00717e-68	1694.35	1716.37	3377.09	3630.27	3337.54
ENSG00000179058.7	C9orf50	13.7782	6.73794	18.4717	1.46039	0.0304977	0.0490616	5.58453	7.89135	23.3238	16.585	15.5063
ENSG00000147894.17	C9orf72	194.603	39.2116	298.197	2.9417	2.01919e-42	2.06654e-41	32.3903	46.0329	305.153	309.586	279.851
ENSG00000185015.8	CA13	46.8889	23.4654	62.5046	1.4103	2.59097e-05	6.35842e-05	24.5719	22.3588	60.2531	64.4971	62.7635
ENSG00000007402.12	CACNA2D2	66.1314	4.50413	107.216	4.65219	9.04231e-15	4.06353e-14	1.11691	7.89135	133.14	86.6104	101.898
ENSG00000151893.15	CACUL1	897.695	529.965	1142.85	1.10331	2.77304e-40	2.70581e-39	578.558	481.372	1131.2	1157.26	1140.08
ENSG00000081803.16	CADPS2	211.622	78.7468	300.206	1.93503	1.35738e-31	1.06387e-30	75.9497	81.544	292.519	299.451	308.649
ENSG00000004660.15	CAMKK1	69.8633	18.9613	103.798	2.42848	5.02473e-13	2.08791e-12	23.455	14.4675	120.506	98.5885	92.2992
ENSG00000164615.6	CAMLG	751.043	459.913	945.129	1.03785	6.50973e-34	5.48793e-33	471.335	448.492	896.994	996.942	941.452
ENSG00000105519.18	CAPS	116.398	47.5884	162.272	1.76199	6.01718e-14	2.60655e-13	49.1439	46.0329	182.703	166.771	137.341
ENSG00000141527.18	CARD14	7.91849	2.43213	11.5761	2.24805	0.025868	0.04213	2.23381	2.63045	15.5492	11.0567	8.12233
ENSG00000159753.14	CARMIL2	6.63822	1.77452	9.88068	2.46267	0.0297663	0.04797	2.23381	1.31523	9.71824	7.3711	12.5527
ENSG00000239282.8	CASTOR1	72.0353	44.9318	90.1044	1.02315	0.00084301	0.00173012	34.6241	55.2395	73.8586	82.0035	114.451
ENSG00000175294.6	CATSPER1	14.9081	4.30581	21.9764	2.36923	0.00105507	0.00213927	3.35072	5.2609	23.3238	21.1919	21.4134
ENSG00000078699.22	CBFA2T2	367.332	191.804	484.35	1.33957	6.04651e-31	4.67285e-30	187.64	195.969	477.166	474.515	501.369
ENSG00000129993.15	CBFA2T3	16.0169	0	26.6949	6.9082	5.60485e-06	1.46528e-05	0	0	22.352	26.7202	31.0125
ENSG00000114423.23	CBLB	869.543	490.236	1122.41	1.20024	1.77729e-41	1.78017e-40	455.698	524.775	1127.32	1054.07	1185.86
ENSG00000100307.13	CBX7	278.32	141.982	369.212	1.38244	1.08233e-20	6.17935e-20	134.029	149.936	405.251	324.328	378.058
ENSG00000103021.9	CCDC113	41.2698	15.1512	58.6822	1.95573	5.57047e-07	1.5855e-06	14.5198	15.7827	63.1686	55.2833	57.5947
ENSG00000183323.13	CCDC125	94.7885	47.6875	126.189	1.40542	7.07313e-09	2.3122e-08	48.027	47.3481	135.084	106.881	136.603
ENSG00000135637.14	CCDC142	111.194	67.2073	140.518	1.05316	2.76251e-06	7.43014e-06	72.5989	61.8156	154.52	151.108	115.928
ENSG00000153237.18	CCDC148	15.3992	4.86426	22.4225	2.21955	0.0020628	0.00401186	4.46763	5.2609	20.4083	16.585	30.2741
ENSG00000181982.19	CCDC149	370.809	216.476	473.698	1.12272	7.71039e-21	4.4249e-20	235.667	197.284	505.349	450.559	465.188
ENSG00000149548.15	CCDC15	21.7169	11.9623	28.22	1.2347	0.0146731	0.0250038	13.4029	10.5218	25.2674	27.6416	31.7509
ENSG00000198003.12	CCDC151	5.93603	0	9.89338	5.48262	0.00132375	0.00264767	0	0	6.80277	7.3711	15.5063
ENSG00000280670.3	CCDC163	34.1274	20.4748	43.2292	1.07867	0.00538116	0.00984313	21.2212	19.7284	43.7321	38.6983	47.2572
ENSG00000164989.17	CCDC171	39.6764	23.862	50.2193	1.07864	0.00334371	0.00630531	20.1043	27.6197	57.3376	49.7549	43.5652
ENSG00000196118.12	CCDC189	28.799	13.0166	39.3206	1.61688	0.000478621	0.00101606	8.93525	17.0979	41.7884	37.7769	38.3965
ENSG00000163617.11	CCDC191	27.0918	16.2682	34.3076	1.07083	0.0155035	0.0262743	16.7536	15.7827	39.8448	31.3272	31.7509
ENSG00000141519.15	CCDC40	58.9259	24.7806	81.6894	1.72254	3.45766e-08	1.0767e-07	24.5719	24.9893	85.5205	74.6324	84.9153
ENSG00000108588.14	CCDC47	1987.87	1239.85	2486.55	1.00409	6.35164e-78	1.21805e-76	1234.18	1245.52	2500.5	2484.06	2475.1
ENSG00000139537.11	CCDC65	9.60217	3.54904	13.6376	1.91445	0.0280525	0.0453822	4.46763	2.63045	17.4928	13.8208	9.59912
ENSG00000166510.14	CCDC68	52.285	28.3923	68.2135	1.24472	0.000168055	0.000377557	35.741	21.0436	77.7459	62.6544	64.2402
ENSG00000216937.13	CCDC7	24.2988	7.45821	35.5258	2.20363	0.000139071	0.000315321	12.286	2.63045	32.0702	40.5411	33.9661
ENSG00000169515.8	CCDC8	192.703	106.455	250.202	1.24302	2.60999e-13	1.09986e-12	97.1709	115.74	229.351	241.404	279.851
ENSG00000179071.5	CCDC89	25.353	12.7191	33.7757	1.41752	0.00306507	0.00580744	12.286	13.1523	30.1266	31.3272	39.8733
ENSG00000105321.14	CCDC9	403.856	199.534	540.071	1.44336	2.44298e-29	1.80515e-28	182.056	217.012	482.997	584.16	553.057
ENSG00000006606.9	CCL26	27.768	8.05317	40.9112	2.37562	8.7327e-06	2.23917e-05	5.58453	10.5218	34.0138	41.4624	47.2572
ENSG00000151882.11	CCL28	6.24061	0.657613	9.9626	4.02617	0.0143802	0.0245256	0	1.31523	14.5774	6.44971	8.86072
ENSG00000129315.11	CCNT1	888.011	360.17	1239.91	1.78248	2.67454e-106	7.04795e-105	365.229	355.111	1227.41	1250.32	1241.98
ENSG00000103540.16	CCP110	363.577	211.053	465.26	1.13652	1.83939e-19	1.00428e-18	230.083	192.023	421.772	491.1	482.909
ENSG00000260916.8	CCPG1	4080.94	2455.12	5164.81	1.07444	8.88592e-103	2.24979e-101	2360.02	2550.22	5085.56	5237.17	5171.71
ENSG00000184451.5	CCR10	79.2882	45.2554	101.977	1.1716	1.71431e-06	4.69563e-06	45.7932	44.7177	100.098	103.195	102.637
ENSG00000154429.11	CCSAP	284.036	103.95	404.093	1.95406	3.6477e-42	3.70387e-41	110.574	97.3267	396.504	404.489	411.285
ENSG00000228409.6	CCT6P1	29.3468	10.8454	41.681	1.94382	3.86158e-05	9.2984e-05	11.1691	10.5218	35.9575	43.3052	45.7804
ENSG00000177675.9	CD163L1	189.246	111.581	241.023	1.11417	2.71957e-12	1.08468e-11	106.106	117.055	229.351	258.91	234.809
ENSG00000120217.14	CD274	57.1755	35.4277	71.674	1.01035	0.000550412	0.00115957	37.9748	32.8806	78.7178	65.4185	70.8858
ENSG00000196352.16	CD55	407.539	183.553	556.863	1.60065	1.06665e-45	1.17302e-44	184.29	182.816	558.799	556.518	555.272
ENSG00000129226.14	CD68	524.055	277.169	688.646	1.30539	1.5319e-32	1.23758e-31	314.968	239.371	679.305	676.299	710.335
ENSG00000164649.20	CDCA7L	234.746	85.944	333.947	1.96225	2.79727e-32	2.24346e-31	83.768	88.1201	299.322	354.734	347.783
ENSG00000129910.8	CDH15	29.7985	0	49.6642	7.80387	1.48986e-07	4.42248e-07	0	0	49.563	39.6197	59.8099
ENSG00000148600.15	CDHR1	35.2174	1.77452	57.5127	4.99262	1.77125e-08	5.63563e-08	2.23381	1.31523	59.2813	49.7549	63.5019
ENSG00000156345.18	CDK20	63.3555	28.528	86.5739	1.60703	1.01675e-07	3.05854e-07	26.8058	30.2502	94.2669	74.6324	90.8224
ENSG00000167797.8	CDK2AP2	350.775	179.247	465.126	1.37329	8.78087e-31	6.73896e-30	180.939	177.555	479.109	468.065	448.205
ENSG00000108465.15	CDK5RAP3	1157.6	642.782	1500.81	1.22154	8.68014e-39	8.21617e-38	641.104	644.46	1617.12	1559.91	1325.42
ENSG00000145996.11	CDKAL1	111.898	66.5496	142.13	1.08525	1.67304e-07	4.95105e-07	72.5989	60.5004	147.717	146.501	132.172
ENSG00000147883.12	CDKN2B	506.265	286.783	652.586	1.18654	1.17819e-33	9.85216e-33	288.162	285.404	662.784	627.465	667.508
ENSG00000064309.15	CDON	31.9198	19.5562	40.1622	1.05275	0.00965427	0.0169204	16.7536	22.3588	36.9293	37.7769	45.7804
ENSG00000241322.11	CDRT1	10.4029	3.08974	15.2784	2.31665	0.0123375	0.0212837	2.23381	3.94568	16.521	21.1919	8.12233
ENSG00000241104.5	CEACAMP10	20.6693	0	34.4488	7.27308	1.23768e-06	3.43075e-06	0	0	30.1266	37.7769	35.4429
ENSG00000245848.3	CEBPA	9.65729	0.657613	15.6571	4.6852	0.00261302	0.00500232	0	1.31523	20.4083	11.0567	15.5063
ENSG00000140488.16	CELF6	14.517	4.30581	21.3244	2.33121	0.00153794	0.00304853	3.35072	5.2609	17.4928	22.1133	24.367
ENSG00000008300.17	CELSR3	132.153	24.6815	203.801	3.04032	3.56199e-28	2.54698e-27	25.6889	23.6741	234.21	177.828	199.366
ENSG00000205923.3	CEMP1	17.3056	2.79227	26.9812	3.20297	0.000756064	0.00156579	5.58453	0	10.6901	45.148	25.1054
ENSG00000151849.16	CENPJ	268.269	72.8283	398.562	2.44713	4.83141e-49	5.69731e-48	75.9497	69.7069	386.786	429.367	379.534
ENSG00000166451.14	CENPN	270.866	112.995	376.113	1.74058	3.09494e-33	2.54679e-32	104.989	121.001	360.547	397.118	370.674
ENSG00000101639.18	CEP192	369.236	188.083	490.005	1.37612	6.85443e-27	4.70578e-26	199.926	176.24	538.391	448.716	482.909
ENSG00000135837.16	CEP350	830.68	441.907	1089.86	1.30051	9.21783e-53	1.17653e-51	444.529	439.285	1160.36	1057.75	1051.47
ENSG00000213066.13	CEP43	232.615	140.928	293.74	1.06146	1.98967e-14	8.79852e-14	138.496	143.36	295.435	287.473	298.311
ENSG00000166037.11	CEP57	401.347	231.7	514.446	1.14812	9.747e-26	6.49032e-25	234.55	228.849	519.926	531.641	491.77
ENSG00000183137.15	CEP57L1	186.028	115.03	233.36	1.02309	9.07007e-11	3.31934e-10	111.691	118.37	219.632	247.853	232.594
ENSG00000114107.9	CEP70	279.551	60.344	425.689	2.83014	4.10082e-60	5.9164e-59	53.6115	67.0765	412.053	433.052	431.96
ENSG00000101624.11	CEP76	112.387	58.8305	148.092	1.33512	1.88544e-10	6.78784e-10	55.8453	61.8156	154.52	142.815	146.94
ENSG00000173588.15	CEP83	91.8343	56.5966	115.326	1.03111	8.25635e-06	2.12265e-05	51.3777	61.8156	111.76	127.152	107.067
ENSG00000130695.16	CEP85	114.023	56.2992	152.505	1.43997	8.12549e-12	3.15629e-11	54.7284	57.8699	146.745	159.4	151.371
ENSG00000258890.7	CEP95	430.74	147.034	619.876	2.06789	3.34853e-59	4.77767e-58	158.601	135.468	614.193	664.321	581.116
ENSG00000134255.14	CEPT1	285.915	154.988	373.199	1.26294	3.62731e-22	2.16174e-21	165.302	144.675	362.49	384.219	372.889
ENSG00000260807.7	CEROX1	45.4229	18.0427	63.6764	1.81577	1.39122e-06	3.84121e-06	18.9874	17.0979	53.4503	75.5538	62.0251
ENSG00000113163.18	CERT1	610.679	244.878	854.546	1.80103	1.32026e-76	2.47668e-75	249.07	240.686	876.585	843.07	843.984
ENSG00000188931.4	CFAP126	20.3111	9.53021	27.4984	1.51895	0.00490179	0.00902272	11.1691	7.89135	26.2393	26.7202	29.5357
ENSG00000206530.11	CFAP44	132.113	51.8315	185.634	1.84433	1.48125e-15	6.87597e-15	45.7932	57.8699	218.66	178.749	159.493
ENSG00000188596.11	CFAP54	12.034	1.21607	19.246	3.99818	0.000592472	0.0012416	1.11691	1.31523	14.5774	20.2705	22.8902
ENSG00000183833.16	CFAP91	24.0952	2.33297	38.6033	4.00226	9.2024e-07	2.57804e-06	3.35072	1.31523	35.9575	45.148	34.7045
ENSG00000114656.12	CFAP92	12.5359	4.7651	17.7165	1.874	0.0125891	0.0216647	5.58453	3.94568	22.352	17.5064	13.2911
ENSG00000138028.16	CGREF1	354.184	221.919	442.36	1.00467	1.21519e-15	5.66469e-15	196.576	247.262	422.744	430.288	474.049
ENSG00000138135.7	CH25H	8.47416	1.67536	13.0067	2.88937	0.013199	0.0226513	3.35072	0	12.6337	6.44971	19.9366
ENSG00000136457.10	CHAD	10.4692	3.1889	15.3228	2.32053	0.00976227	0.017098	1.11691	5.2609	11.6619	16.585	17.7214
ENSG00000106554.13	CHCHD3	588.235	322.445	765.429	1.25022	7.40202e-39	7.01065e-38	316.085	328.806	719.15	784.101	793.035
ENSG00000214973.3	CHCHD3P3	49.4918	23.2044	67.0167	1.53769	4.67148e-06	1.22873e-05	20.1043	26.3045	68.9995	70.0255	62.0251
ENSG00000159685.11	CHCHD6	94.2471	51.1739	122.963	1.27737	1.22121e-07	3.65303e-07	45.7932	56.5547	111.76	116.095	141.033
ENSG00000153922.11	CHD1	551.314	269.127	739.439	1.45145	4.19236e-45	4.55544e-44	287.045	251.208	771.628	748.167	698.52
ENSG00000171316.12	CHD7	12.3927	4.86426	17.4117	1.84915	0.0148051	0.0252093	4.46763	5.2609	11.6619	22.1133	18.4598
ENSG00000110721.12	CHKA	231.267	67.0716	340.73	2.32775	7.71852e-36	6.81861e-35	81.5342	52.609	311.956	375.005	335.231
ENSG00000188419.14	CHM	479.228	259.335	625.824	1.26743	3.31748e-36	2.95597e-35	271.408	247.262	629.742	620.094	627.635
ENSG00000164695.5	CHMP4C	27.6559	11.503	38.4245	1.73847	0.000227536	0.00050338	11.1691	11.837	39.8448	41.4624	33.9661
ENSG00000108556.10	CHRNE	57.9907	0.657613	96.2128	7.31375	3.15882e-07	9.14365e-07	0	1.31523	97.1824	90.296	101.16
ENSG00000185043.12	CIB1	788.231	397.805	1048.52	1.39761	1.5813e-61	2.35664e-60	393.151	402.459	1062.2	1079.87	1003.48
ENSG00000267493.4	CIRBP-AS1	30.8984	16.4665	40.5196	1.30285	0.0020666	0.0040178	14.5198	18.4132	43.7321	42.3838	35.4429
ENSG00000247572.8	CKMT2-AS1	65.2735	27.8704	90.2089	1.69356	1.25852e-08	4.04917e-08	26.8058	28.935	95.2388	94.9029	80.4849
ENSG00000123975.5	CKS2	237.719	89.4669	336.554	1.92463	5.19249e-32	4.13239e-31	73.7158	105.218	337.223	348.285	324.155
ENSG00000109572.14	CLCN3	1453.27	691.926	1960.83	1.49843	7.15603e-105	1.86357e-103	739.392	644.46	1965.03	1957.03	1960.44
ENSG00000073464.13	CLCN4	86.5325	18.3036	132.018	2.82497	2.65017e-19	1.44187e-18	23.455	13.1523	131.196	128.994	135.864
ENSG00000171365.17	CLCN5	167.746	86.0694	222.197	1.35831	1.85911e-13	7.88583e-13	97.1709	74.9678	245.872	199.941	220.78
ENSG00000011021.23	CLCN6	465.47	178.751	656.616	1.87307	5.83502e-63	8.93415e-62	186.523	170.979	672.502	643.129	654.217
ENSG00000103249.18	CLCN7	1261.93	640.178	1676.43	1.38675	8.60736e-87	1.84214e-85	655.624	624.732	1740.54	1628.09	1660.65
ENSG00000163347.6	CLDN1	463.909	14.7546	763.345	5.66097	1.38802e-80	2.73631e-79	18.9874	10.5218	762.882	759.224	767.929
ENSG00000157224.16	CLDN12	578.171	305.321	760.071	1.31442	4.38389e-41	4.35998e-40	301.565	309.078	792.037	774.887	713.288
ENSG00000106404.14	CLDN15	109.819	50.318	149.487	1.5789	3.69192e-12	1.46196e-11	48.027	52.609	135.084	146.501	166.877
ENSG00000165215.6	CLDN3	9.24661	0.558453	15.0387	4.64494	0.00300426	0.00570269	1.11691	0	16.521	10.1353	18.4598
ENSG00000110852.5	CLEC2B	103.402	59.0549	132.967	1.15968	3.90029e-07	1.12249e-06	68.1313	49.9786	122.45	150.186	126.265
ENSG00000113282.14	CLINT1	1520.28	822.912	1985.19	1.26949	4.15655e-92	9.48538e-91	834.329	811.494	1952.39	2031.66	1971.51
ENSG00000182372.10	CLN8	389.414	197.165	517.58	1.39574	2.20681e-34	1.87882e-33	186.523	207.806	516.039	531.641	505.061
ENSG00000162129.14	CLPB	305.413	129.749	422.523	1.70066	2.31251e-31	1.80153e-30	138.496	121.001	430.518	377.769	459.281
ENSG00000132361.18	CLUH	731.771	342.659	991.178	1.535	2.78371e-71	4.80864e-70	332.838	352.48	993.204	977.592	1002.74
ENSG00000103121.9	CMC2	282.566	162.718	362.465	1.15752	4.34338e-18	2.2441e-17	159.718	165.718	335.279	388.826	363.29
ENSG00000184220.12	CMSS1	153.519	54.2637	219.69	2.02271	6.34992e-22	3.75685e-21	48.027	60.5004	233.238	233.111	192.721
ENSG00000133313.15	CNDP2	804.957	347.936	1109.64	1.66841	1.67606e-82	3.4082e-81	369.696	326.176	1087.47	1139.76	1101.68
ENSG00000168763.16	CNNM3	348.116	150.062	480.153	1.67611	6.06967e-42	6.11904e-41	154.133	145.99	480.081	474.515	485.863
ENSG00000182973.19	CNOT10	711.543	259.121	1013.16	1.97386	8.53133e-93	1.96716e-91	236.784	281.458	996.12	1042.09	1001.26
ENSG00000138767.13	CNOT6L	325.617	163.339	433.802	1.4069	4.68902e-29	3.43854e-28	167.536	159.142	454.814	410.939	435.652
ENSG00000230183.4	CNOT6LP1	11.0884	3.6482	16.0485	2.14588	0.00816972	0.0144691	3.35072	3.94568	14.5774	16.585	16.9831
ENSG00000144580.14	CNOT9	953.07	405.243	1318.29	1.69481	6.10934e-84	1.26726e-82	450.113	360.372	1316.82	1303.76	1334.28
ENSG00000257727.6	CNPY2	800.581	489.929	1007.68	1.04079	1.50405e-40	1.47595e-39	481.387	498.47	1017.5	1019.05	986.494
ENSG00000166685.12	COG1	804.68	303.385	1138.88	1.91088	1.44074e-104	3.72692e-103	293.746	313.024	1118.57	1168.32	1129.74
ENSG00000136152.15	COG3	772.575	353.855	1051.72	1.56703	4.26047e-73	7.60553e-72	369.696	338.013	1083.58	1050.38	1021.2
ENSG00000164597.15	COG5	1014.33	565.424	1313.61	1.21799	1.14901e-63	1.77683e-62	549.518	581.33	1299.33	1336.01	1305.48
ENSG00000133103.17	COG6	1230.49	330.984	1830.16	2.46477	1.02818e-209	6.12756e-208	338.423	323.545	1837.72	1847.38	1805.37
ENSG00000123500.10	COL10A1	7.76356	0	12.9393	5.85406	0.000309385	0.000673964	0	0	12.6337	16.585	9.59912
ENSG00000169031.20	COL4A3	26.9379	5.2244	41.4136	2.93833	1.03793e-06	2.89936e-06	7.81835	2.63045	45.6757	42.3838	36.1813
ENSG00000081052.13	COL4A4	148.527	76.5757	196.494	1.36035	1.0221e-13	4.38954e-13	78.1835	74.9678	191.449	189.806	208.227
ENSG00000269897.5	COMMD3-BMI1	46.4844	12.2598	69.3009	2.51047	8.473e-08	2.56424e-07	10.0522	14.4675	94.2669	44.2266	69.409
ENSG00000115520.8	COQ10B	776.251	444.24	997.592	1.16621	8.64728e-49	1.01584e-47	447.88	440.6	995.148	1008.92	988.709
ENSG00000167113.11	COQ4	247.512	140.406	318.915	1.18874	2.55559e-17	1.28152e-16	129.561	151.251	333.336	305.901	317.509
ENSG00000088682.14	COQ9	493.026	264.309	645.504	1.28911	1.25647e-34	1.07623e-33	252.421	276.197	674.446	655.107	606.96
ENSG00000160111.14	CPAMD8	39.676	19.3579	53.2213	1.45925	9.72428e-05	0.000224223	18.9874	19.7284	49.563	59.8902	50.2108
ENSG00000214575.9	CPEB1	60.9045	22.0875	86.7826	1.99024	5.12728e-09	1.69181e-08	17.8705	26.3045	70.9432	102.274	87.1305
ENSG00000113742.14	CPEB4	704.655	364.736	931.267	1.34929	1.20934e-53	1.57468e-52	373.047	356.426	966.965	925.995	900.84
ENSG00000139117.14	CPNE8	244.28	140.505	313.463	1.16307	9.47883e-17	4.65382e-16	128.444	152.566	316.815	317.879	305.695
ENSG00000106066.15	CPVL	8.45754	1.87368	12.8468	2.81656	0.0080409	0.0142621	1.11691	2.63045	10.6901	13.8208	14.0295
ENSG00000143320.9	CRABP2	309.981	102.447	448.337	2.14133	5.13325e-47	5.79735e-46	90.4694	114.425	416.913	460.694	467.403
ENSG00000107175.12	CREB3	1477.31	546.656	2097.75	1.93397	2.88469e-121	8.97557e-120	605.363	487.949	2050.55	2181.85	2060.86
ENSG00000143162.9	CREG1	904.881	486.244	1183.97	1.28352	1.42922e-59	2.04864e-58	485.854	486.633	1153.56	1238.35	1160.02
ENSG00000175874.10	CREG2	6.2212	0	10.3687	5.53329	0.00101778	0.0020679	0	0	9.71824	14.7422	6.64554
ENSG00000119878.6	CRIPT	369.982	230.557	462.932	1.00602	1.37328e-16	6.69152e-16	217.797	243.317	481.053	488.336	419.408
ENSG00000100368.14	CSF2RB	14.6644	0.657613	24.0023	5.31196	0.000406728	0.000873129	0	1.31523	19.4365	23.0347	29.5357
ENSG00000101266.19	CSNK2A1	2184.89	1328.7	2755.69	1.05421	4.04221e-73	7.22422e-72	1300.08	1357.31	2643.36	2796.41	2827.31
ENSG00000254598.3	CSNK2A3	12.2039	3.6482	17.9077	2.2876	0.016423	0.027726	3.35072	3.94568	30.1266	18.4278	5.16876
ENSG00000280330.1	CTBP2P10	14.7865	5.32356	21.0951	1.97073	0.00404864	0.00753014	6.70144	3.94568	18.4647	21.1919	23.6286
ENSG00000279177.1	CTBP2P9	14.7865	5.32356	21.0951	1.97073	0.00404864	0.00753014	6.70144	3.94568	18.4647	21.1919	23.6286
ENSG00000233937.7	CTC-338M12.4	34.2828	18.7994	44.6051	1.25598	0.00174491	0.00342983	17.8705	19.7284	37.9011	44.2266	51.6876
ENSG00000116761.12	CTH	128.747	62.5152	172.902	1.48358	2.69099e-12	1.07383e-11	51.3777	73.6526	156.464	176.906	185.337
ENSG00000040531.16	CTNS	345.787	166.951	465.011	1.47169	2.93504e-33	2.41778e-32	178.705	155.197	479.109	455.166	460.758
ENSG00000276077.4	CU633904.1	35.4605	16.2316	48.2797	1.53719	0.000704281	0.00146344	24.5719	7.89135	55.394	48.8336	40.6117
ENSG00000288187.1	CU633906.5	51.9689	14.2953	77.0846	2.41651	1.23609e-10	4.48935e-10	16.7536	11.837	78.7178	72.7896	79.7465
ENSG00000163510.14	CWC22	340.899	190.093	441.436	1.21449	4.70371e-23	2.89108e-22	192.108	188.077	416.913	475.436	431.96
ENSG00000081041.9	CXCL2	21.5568	10.026	29.2441	1.55809	0.0149567	0.0254563	5.58453	14.4675	38.873	34.0913	14.7679
ENSG00000169429.11	CXCL8	229.2	121.236	301.176	1.30487	6.33669e-17	3.12996e-16	130.678	111.794	296.406	331.7	275.421
ENSG00000154832.16	CXXC1	497.417	280.306	642.158	1.19447	7.6381e-32	6.05073e-31	287.045	273.567	667.643	605.352	653.478
ENSG00000008283.16	CYB561	358.77	121.048	517.251	2.10431	1.63894e-54	2.165e-53	110.574	131.523	488.828	526.112	536.812
ENSG00000114395.11	CYB561D2	478.844	83.9086	742.134	3.15126	1.2868e-104	3.33428e-103	77.0666	90.7505	753.164	766.595	706.643
ENSG00000271858.5	CYB561D2	53.4476	8.11582	83.6688	3.31462	2.8446e-13	1.19612e-12	12.286	3.94568	86.4924	84.7677	79.7465
ENSG00000182224.12	CYB5D1	271.307	89.8897	392.252	2.13333	1.84889e-42	1.89349e-41	83.768	96.0114	393.589	366.712	416.454
ENSG00000172115.9	CYCS	2754	994.304	3927.14	1.98093	4.03921e-204	2.33536e-202	1007.45	981.158	3769.71	4164.67	3847.03
ENSG00000083799.18	CYLD	1389.15	696.576	1850.86	1.40808	4.47555e-86	9.55216e-85	709.236	683.917	1954.34	1777.36	1820.88
ENSG00000138061.12	CYP1B1	4366.65	2258.38	5772.16	1.3521	1.07942e-81	2.16935e-80	2465.01	2051.75	5665.74	5723.66	5927.09
ENSG00000111012.10	CYP27B1	37.884	4.20665	60.3355	3.83093	7.79896e-10	2.71135e-09	4.46763	3.94568	63.1686	69.1041	48.734
ENSG00000186104.11	CYP2R1	77.5454	32.8964	107.311	1.69825	4.6182e-10	1.63116e-09	36.8579	28.935	109.816	97.6671	114.451
ENSG00000145476.16	CYP4V2	190.601	91.3668	256.757	1.49659	6.35514e-18	3.26069e-17	89.3525	93.381	235.181	247.853	287.235
ENSG00000145041.15	DCAF1	438.868	179.967	611.469	1.76214	2.04678e-54	2.69914e-53	187.64	172.295	591.841	616.408	626.158
ENSG00000122741.16	DCAF10	863.292	531.912	1084.21	1.02392	9.33327e-34	7.82147e-33	564.038	499.786	1134.12	1022.74	1095.78
ENSG00000164934.14	DCAF13	1066.89	380.446	1524.52	1.99989	1.77818e-133	6.13649e-132	388.684	372.209	1530.62	1576.49	1466.45
ENSG00000163257.11	DCAF16	346.126	181.544	455.848	1.32498	2.57694e-28	1.84774e-27	192.108	170.979	439.265	461.615	466.665
ENSG00000197312.12	DDI2	441.297	270.343	555.267	1.03577	1.90614e-21	1.11624e-20	288.162	252.523	557.827	522.427	585.546
ENSG00000175197.12	DDIT3	1183.9	370.926	1725.88	2.22155	2.75377e-140	9.9463e-139	355.176	386.676	1610.31	1826.19	1741.13
ENSG00000145358.6	DDIT4L	28.9494	12.8183	39.7034	1.63581	0.000358187	0.000774469	11.1691	14.4675	42.7603	42.3838	33.9661
ENSG00000013573.17	DDX11	85.9221	34.7075	120.065	1.79306	3.62143e-11	1.35869e-10	31.2734	38.1415	130.224	128.073	101.898
ENSG00000088205.13	DDX18	1440.68	729.932	1914.5	1.38897	2.69883e-104	6.96974e-103	748.328	711.537	1924.21	1931.23	1888.07
ENSG00000165732.13	DDX21	2530.18	1454	3247.64	1.15946	6.83335e-114	1.96443e-112	1444.16	1463.85	3300.32	3220.25	3222.35
ENSG00000125485.17	DDX31	171.331	88.4753	226.567	1.35924	8.30867e-15	3.74035e-14	84.8849	92.0658	210.886	248.775	220.041
ENSG00000123136.15	DDX39A	446.787	186.93	620.025	1.72059	1.68105e-43	1.76357e-42	205.511	168.349	637.517	656.949	565.61
ENSG00000145833.16	DDX46	1028	582.825	1324.79	1.18204	1.42109e-60	2.06758e-59	605.363	560.286	1334.31	1310.21	1329.85
ENSG00000111364.16	DDX55	255.498	131.398	338.231	1.36447	2.42224e-21	1.41259e-20	127.327	135.468	331.392	365.791	317.509
ENSG00000160570.14	DEDD2	617.891	125.417	946.207	2.92075	3.09139e-120	9.48536e-119	120.626	130.207	886.304	951.794	1000.52
ENSG00000257093.7	DENND11	386.074	181.121	522.71	1.52642	6.02059e-35	5.21459e-34	182.056	180.186	571.433	501.235	495.462
ENSG00000174485.16	DENND4A	649.846	337.56	858.037	1.34608	1.54704e-50	1.88603e-49	338.423	336.698	878.529	822.799	872.781
ENSG00000136986.10	DERL1	1747.9	777.536	2394.82	1.61893	1.00681e-126	3.26372e-125	834.329	720.743	2386.8	2369.81	2427.84
ENSG00000099958.15	DERL3	31.4438	11.3047	44.8699	1.96888	3.08874e-05	7.52367e-05	13.4029	9.20658	46.6476	52.5191	35.4429
ENSG00000100418.8	DESI1	876.619	526.672	1109.92	1.07584	1.99996e-45	2.18698e-44	519.362	533.981	1142.87	1088.16	1098.73
ENSG00000062282.15	DGAT2	8.02858	0.558453	13.0087	4.43123	0.0051836	0.00950532	1.11691	0	16.521	9.21388	13.2911
ENSG00000183628.14	DGCR6	41.0848	22.0875	53.7497	1.30196	0.00136088	0.00271578	17.8705	26.3045	36.9293	57.126	67.1938
ENSG00000157680.16	DGKI	443.12	193.793	609.338	1.64191	2.86159e-42	2.9133e-41	224.498	163.088	607.39	602.588	618.036
ENSG00000172893.16	DHCR7	801.053	307.493	1130.09	1.88171	8.94065e-80	1.74478e-78	299.331	315.654	1079.7	1078.95	1231.64
ENSG00000117682.17	DHDDS	1160.97	409.136	1662.2	2.01909	2.37868e-145	9.03374e-144	421.074	397.198	1715.27	1666.79	1604.53
ENSG00000181192.12	DHTKD1	231.705	127.353	301.273	1.24107	2.03536e-18	1.06691e-17	128.444	126.262	301.266	304.979	297.573
ENSG00000083520.15	DIS3	1331.48	661.582	1778.08	1.42634	2.91334e-103	7.42471e-102	658.975	664.189	1761.92	1814.21	1758.12
ENSG00000107984.10	DKK1	756.567	154.268	1158.1	2.90513	6.48179e-159	2.75921e-157	158.601	149.936	1171.05	1157.26	1145.99
ENSG00000176124.15	DLEU1	60.2885	34.6083	77.4086	1.16355	7.28215e-05	0.000170243	32.3903	36.8263	72.8868	88.4532	70.8858
ENSG00000177337.8	DLGAP1-AS1	90.9316	49.8587	118.314	1.25321	2.79214e-07	8.1095e-07	45.7932	53.9242	103.013	134.523	117.405
ENSG00000262001.1	DLGAP1-AS2	56.7305	6.44046	90.2572	3.76548	3.57093e-14	1.56304e-13	8.93525	3.94568	98.1542	95.8243	76.7929
ENSG00000132837.15	DMGDH	8.66985	0.558453	14.0774	4.5524	0.0037376	0.0069953	1.11691	0	10.6901	13.8208	17.7214
ENSG00000172869.14	DMXL1	575.56	352.477	724.282	1.03472	3.09061e-25	2.0249e-24	362.995	341.959	780.375	716.84	675.63
ENSG00000104093.14	DMXL2	334.681	205.306	420.93	1.0325	5.9472e-19	3.19085e-18	213.329	197.284	428.574	415.546	418.669
ENSG00000174844.14	DNAH12	9.36821	1.21607	14.803	3.60238	0.00406567	0.0075591	1.11691	1.31523	17.4928	20.2705	6.64554
ENSG00000183914.14	DNAH2	6.53343	1.21607	10.0783	3.05037	0.0177601	0.0298021	1.11691	1.31523	10.6901	12.8994	6.64554
ENSG00000103423.14	DNAJA3	695.759	346.245	928.768	1.42656	7.37612e-59	1.04092e-57	329.487	363.002	925.177	949.951	911.178
ENSG00000135924.16	DNAJB2	1165.42	607.6	1537.31	1.34262	2.62442e-76	4.89945e-75	570.739	644.46	1551.03	1551.62	1509.28
ENSG00000128590.5	DNAJB9	733.984	353.479	987.654	1.48766	6.10893e-59	8.63667e-58	329.487	377.47	938.782	1027.35	996.831
ENSG00000136770.11	DNAJC1	801.435	423.786	1053.2	1.32028	2.17587e-49	2.5875e-48	381.982	465.59	1025.27	1057.75	1076.58
ENSG00000077232.19	DNAJC10	4604.11	2172.29	6225.32	1.51792	4.78344e-226	3.11426e-224	2212.59	2131.98	6368.36	6123.54	6184.05
ENSG00000108176.15	DNAJC12	102.75	36.9048	146.647	1.97842	3.79502e-15	1.7336e-14	43.5594	30.2502	148.689	131.758	159.493
ENSG00000059769.20	DNAJC25	261.068	147.431	336.825	1.18833	1.21994e-18	6.4449e-18	154.133	140.729	348.885	323.407	338.184
ENSG00000115137.12	DNAJC27	89.2511	49.5612	115.711	1.2234	1.3274e-07	3.95844e-07	49.1439	49.9786	119.534	112.409	115.189
ENSG00000102580.15	DNAJC3	2312.06	1081.23	3132.61	1.5317	1.98466e-111	5.5013e-110	1161.58	1000.89	3177.87	3013.86	3206.11
ENSG00000247400.4	DNAJC3-DT	24.9908	8.31414	36.1086	2.10439	7.98007e-05	0.000185523	10.0522	6.57613	30.1266	40.5411	37.6581
ENSG00000116675.16	DNAJC6	39.0925	4.86426	61.9114	3.68181	2.78444e-10	9.93207e-10	4.46763	5.2609	61.2249	54.3619	70.1474
ENSG00000227540.1	DNAJC9-AS1	19.5604	6.53962	28.2409	2.0949	0.000466974	0.000993104	7.81835	5.2609	30.1266	25.7989	28.7974
ENSG00000236756.4	DNAJC9-AS1	14.6063	5.62104	20.5965	1.9051	0.00767491	0.0136457	3.35072	7.89135	14.5774	25.7989	21.4134
ENSG00000179532.13	DNHD1	135.948	53.7314	190.759	1.81355	1.19044e-17	6.04186e-17	61.4299	46.0329	208.942	186.12	177.214
ENSG00000213221.5	DNLZ	35.0777	11.9988	50.4637	2.10471	7.63009e-05	0.000177867	5.58453	18.4132	35.9575	71.8682	43.5652
ENSG00000101457.13	DNTTIP1	358.278	219.351	450.896	1.04458	6.40325e-20	3.55112e-19	203.277	235.425	451.898	453.323	447.467
ENSG00000149927.18	DOC2A	5.4008	0	9.00134	5.33364	0.00162637	0.00321339	0	0	8.74642	10.1353	8.12233
ENSG00000129932.10	DOHH	161.863	97.9167	204.494	1.07482	2.87496e-08	9.00859e-08	74.8328	121.001	206.999	213.762	192.721
ENSG00000146094.16	DOK3	59.9258	32.077	78.4917	1.28757	1.71754e-05	4.27351e-05	31.2734	32.8806	89.4078	77.3966	68.6706
ENSG00000172269.19	DPAGT1	779.453	245.771	1135.24	2.21147	9.02822e-113	2.55745e-111	239.018	252.523	1076.78	1137.91	1191.03
ENSG00000205683.11	DPF3	23.6937	6.73794	34.9976	2.38443	4.29727e-05	0.000103043	5.58453	7.89135	40.8166	36.8555	27.3206
ENSG00000132768.14	DPH2	327.063	151.403	444.17	1.54204	2.07482e-29	1.53677e-28	168.653	134.153	476.194	445.03	411.285
ENSG00000134146.12	DPH6	44.6181	26.2577	56.8584	1.10174	0.00113714	0.00229606	30.1565	22.3588	57.3376	60.8116	52.426
ENSG00000148399.13	DPH7	388.148	154.665	543.804	1.81275	2.35749e-46	2.62801e-45	154.133	155.197	529.644	587.845	513.922
ENSG00000142002.18	DPP9	905.72	534.354	1153.3	1.10869	9.15003e-51	1.12434e-49	543.934	524.775	1159.39	1143.44	1157.06
ENSG00000149636.16	DSN1	189.562	90.5735	255.555	1.48866	5.82771e-19	3.12783e-18	98.2878	82.8592	248.787	272.731	245.147
ENSG00000134769.22	DTNA	77.209	45.5164	98.3375	1.10649	1.22951e-05	3.10889e-05	50.2608	40.772	99.1261	90.296	105.59
ENSG00000169570.10	DTWD2	114.028	60.8033	149.512	1.30593	2.5986e-08	8.17237e-08	55.8453	65.7613	161.323	118.859	168.354
ENSG00000105865.11	DUS4L	47.4334	25.0416	62.3613	1.30009	0.000426817	0.000912966	29.0396	21.0436	63.1686	77.3966	46.5188
ENSG00000288558.2	DUS4L-BCAP29	138.601	76.9723	179.686	1.22826	7.40826e-11	2.72469e-10	73.7158	80.2287	182.703	165.85	190.506
ENSG00000162999.13	DUSP19	56.6714	28.1313	75.6982	1.4156	5.09778e-06	1.33723e-05	31.2734	24.9893	80.6614	79.2393	67.1938
ENSG00000120875.9	DUSP4	87.3041	43.0843	116.784	1.42958	3.87644e-09	1.28868e-08	48.027	38.1415	117.591	116.095	116.666
ENSG00000130829.18	DUSP9	12.2921	0	20.4869	6.51439	2.96735e-05	7.24307e-05	0	0	26.2393	21.1919	14.0295
ENSG00000187240.16	DYNC2H1	428.729	206.669	576.769	1.48735	1.43185e-34	1.2251e-33	183.173	230.164	619.052	546.383	564.871
ENSG00000143479.17	DYRK3	1004.71	427.09	1389.79	1.70266	1.47387e-101	3.69542e-100	418.84	435.34	1391.65	1438.29	1339.45
ENSG00000010219.13	DYRK4	262.759	154.268	335.086	1.11941	9.93534e-17	4.87024e-16	158.601	149.936	329.448	320.643	355.167
ENSG00000133740.11	E2F5	47.3222	19.3579	65.9651	1.7692	2.57652e-06	6.94919e-06	18.9874	19.7284	54.4222	82.9249	60.5483
ENSG00000165891.16	E2F7	792.283	163.762	1211.3	2.87861	1.83333e-156	7.67769e-155	177.588	149.936	1254.63	1179.38	1199.89
ENSG00000167967.16	E4F1	265.883	162.692	334.676	1.04921	1.32577e-13	5.66856e-13	145.198	180.186	306.125	353.813	344.091
ENSG00000145088.9	EAF2	44.5453	3.54904	71.8762	4.31353	1.7372e-11	6.6464e-11	4.46763	2.63045	68.9995	72.7896	73.8394
ENSG00000221818.9	EBF2	63.4778	12.1607	97.6892	3.00947	9.57075e-15	4.29478e-14	11.1691	13.1523	104.957	103.195	84.9153
ENSG00000108001.15	EBF3	23.6912	9.53021	33.1319	1.7881	0.000551689	0.00116162	11.1691	7.89135	32.0702	30.4058	36.9197
ENSG00000281649.2	EBLN3P	1723.79	720.819	2392.44	1.73345	2.9173e-160	1.25218e-158	688.015	753.624	2408.18	2415.88	2353.26
ENSG00000131080.15	EDA2R	568.036	285.442	756.432	1.40817	8.32455e-47	9.36739e-46	273.642	297.241	744.417	792.393	732.487
ENSG00000179151.13	EDC3	557.687	321.021	715.465	1.15188	4.34008e-31	3.36079e-30	339.54	302.502	689.023	761.066	696.305
ENSG00000134109.11	EDEM1	1204.43	514.167	1664.61	1.6903	2.56751e-115	7.52052e-114	541.7	486.633	1690.97	1680.61	1622.25
ENSG00000284753.2	EEF1AKMT4	84.118	36.8421	115.635	1.64766	1.08019e-10	3.93638e-10	36.8579	36.8263	122.45	115.173	109.282
ENSG00000178852.16	EFCAB13	35.8664	17.3851	48.1872	1.46103	0.000216637	0.000480641	18.9874	15.7827	53.4503	46.0694	45.042
ENSG00000096093.16	EFHC1	298.026	185.202	373.241	1.01517	2.68797e-16	1.29388e-15	173.121	197.284	372.209	380.533	366.982
ENSG00000140598.15	EFL1	462.953	284.152	582.153	1.03253	3.24306e-24	2.06286e-23	288.162	280.143	575.32	609.959	561.179
ENSG00000143590.14	EFNA3	12.6149	4.86426	17.7819	1.88306	0.0127403	0.0219078	4.46763	5.2609	11.6619	20.2705	21.4134
ENSG00000100842.13	EFS	86.0473	52.6145	108.336	1.03619	3.18781e-05	7.74948e-05	59.1961	46.0329	115.647	91.2174	118.143
ENSG00000172071.14	EIF2AK3	783.878	336.172	1082.35	1.68327	7.34951e-85	1.54101e-83	354.059	318.285	1069.01	1080.79	1097.25
ENSG00000179523.5	EIF3J-DT	119.303	61.4244	157.888	1.35681	3.12645e-11	1.18013e-10	63.6637	59.1851	163.266	161.243	149.156
ENSG00000116299.17	ELAPOR1	33.313	12.0615	47.4807	1.97864	8.35039e-06	2.14612e-05	12.286	11.837	40.8166	50.6763	50.9492
ENSG00000236810.6	ELOA-AS1	32.0547	19.4206	40.4774	1.03391	0.0209276	0.034652	25.6889	13.1523	48.5912	43.3052	29.5357
ENSG00000012660.14	ELOVL5	3794.91	1479.58	5338.46	1.85009	3.41962e-292	2.99362e-290	1518.99	1440.17	5278.95	5298.9	5437.53
ENSG00000170522.10	ELOVL6	459.534	205.072	629.176	1.60919	3.30753e-47	3.7601e-46	223.381	186.762	650.15	627.465	609.913
ENSG00000070061.16	ELP1	951.133	555.685	1214.77	1.12628	3.34695e-49	3.95584e-48	562.921	548.449	1271.15	1193.2	1179.95
ENSG00000134759.14	ELP2	1266.68	782.035	1589.77	1.02358	6.65536e-57	9.10996e-56	776.25	787.82	1620.03	1572.81	1576.47
ENSG00000170291.15	ELP5	373.771	191.606	495.215	1.36967	3.49879e-31	2.71748e-30	189.874	193.338	481.053	526.112	478.479
ENSG00000126749.16	EMG1	441.863	237.905	577.835	1.27657	1.6899e-24	1.08516e-23	253.538	222.273	520.898	647.736	564.871
ENSG00000214595.12	EML6	141.09	8.4133	229.541	4.76105	2.9012e-31	2.25673e-30	8.93525	7.89135	230.322	244.168	214.134
ENSG00000158636.16	EMSY	313.868	181.517	402.102	1.14806	4.39759e-21	2.54256e-20	177.588	185.447	416.913	394.354	395.041
ENSG00000132199.20	ENOSF1	152.77	94.159	191.844	1.02145	3.9743e-08	1.23114e-07	94.9371	93.381	218.66	187.042	169.831
ENSG00000197217.13	ENTPD4	1552.56	926.648	1969.84	1.089	5.33136e-59	7.55804e-58	910.279	943.016	2047.63	1863.05	1998.83
ENSG00000183495.14	EP400	808.614	390.336	1087.47	1.47494	8.7606e-60	1.25923e-58	403.203	377.47	1167.16	1035.64	1059.59
ENSG00000159023.22	EPB41	333.732	115.652	479.118	2.04882	4.18985e-52	5.25256e-51	119.509	111.794	473.278	470.829	493.247
ENSG00000082397.18	EPB41L3	23.3406	9.33189	32.6797	1.78246	0.00108676	0.00219921	13.4029	5.2609	27.2111	33.17	37.6581
ENSG00000152223.15	EPG5	1019.49	565.8	1321.96	1.22041	4.5449e-51	5.60694e-50	589.727	541.873	1407.2	1298.24	1260.44
ENSG00000187266.14	EPOR	310.076	41.3827	489.205	3.59209	7.73312e-73	1.37256e-71	30.1565	52.609	481.053	491.1	495.462
ENSG00000134899.23	ERCC5	1138.58	530.534	1543.94	1.53731	6.81261e-88	1.4826e-86	557.336	503.731	1512.16	1617.04	1502.63
ENSG00000068912.14	ERLEC1	2042	1213	2594.67	1.09466	1.24409e-73	2.23894e-72	1269.92	1156.08	2536.46	2664.65	2582.9
ENSG00000178607.17	ERN1	433.397	136.847	631.097	2.19904	7.61771e-72	1.32476e-70	147.432	126.262	628.77	622.858	641.664
ENSG00000141446.11	ESCO1	422.743	161.366	596.994	1.88594	1.63107e-56	2.22087e-55	167.536	155.197	586.01	579.553	625.419
ENSG00000135476.12	ESPL1	47.7648	22.9069	64.3368	1.48772	8.90552e-06	2.2816e-05	23.455	22.3588	63.1686	66.3399	63.5019
ENSG00000091831.24	ESR1	27.8373	4.20665	43.5911	3.36916	1.38048e-07	4.10883e-07	4.46763	3.94568	39.8448	45.148	45.7804
ENSG00000158220.14	ESYT3	11.7113	1.87368	18.2697	3.31728	0.00100548	0.00204407	1.11691	2.63045	22.352	18.4278	14.0295
ENSG00000006468.14	ETV1	41.018	15.2504	58.1964	1.94246	6.60029e-07	1.86627e-06	13.4029	17.0979	56.3658	59.8902	58.3331
ENSG00000175832.13	ETV4	30.9653	16.4665	40.6312	1.31416	0.0020576	0.00400334	14.5198	18.4132	42.7603	34.0913	45.042
ENSG00000185862.7	EVI2B	6.0748	0	10.1247	5.50424	0.000924261	0.00188912	0	0	9.71824	11.0567	9.59912
ENSG00000081177.18	EXD2	678.245	300.483	930.086	1.62805	5.94e-69	9.92884e-68	311.617	289.35	890.191	956.4	943.667
ENSG00000138190.17	EXOC6	131.236	65.9912	174.732	1.39851	2.30648e-12	9.24683e-12	71.482	60.5004	163.266	188.884	172.046
ENSG00000131187.10	F12	10.6219	4.30581	14.8326	1.80993	0.0263736	0.0428948	3.35072	5.2609	11.6619	12.8994	19.9366
ENSG00000127533.4	F2RL3	25.6639	3.08974	40.7133	3.75167	9.74832e-07	2.72654e-06	2.23381	3.94568	43.7321	26.7202	51.6876
ENSG00000121769.8	FABP3	168.968	27.3484	263.38	3.30188	2.82338e-38	2.63227e-37	17.8705	36.8263	249.759	281.945	258.438
ENSG00000149485.19	FADS1	3648.39	699.118	5614.57	3.00688	0	0	688.015	710.222	5571.47	5654.56	5617.7
ENSG00000134824.14	FADS2	6163.38	2401.28	8671.45	1.85243	0	0	2403.58	2398.97	8637.57	8711.72	8665.05
ENSG00000113194.13	FAF2	1333.31	692.975	1760.2	1.34656	6.49137e-93	1.49901e-91	675.729	710.222	1736.65	1790.26	1753.68
ENSG00000180185.11	FAHD1	469.562	238.996	623.272	1.38123	2.20969e-38	2.0626e-37	241.252	236.741	607.39	660.635	601.791
ENSG00000144199.12	FAHD2B	22.0804	8.05317	31.4319	1.97819	0.000836413	0.00171704	5.58453	10.5218	40.8166	31.3272	22.1518
ENSG00000135472.9	FAIM2	127.099	17.9435	199.869	3.46914	3.91861e-30	2.96913e-29	20.1043	15.7827	183.675	194.413	221.518
ENSG00000166801.16	FAM111A	500.951	271.793	653.723	1.26163	2.37208e-32	1.9105e-31	279.227	264.36	688.052	669.849	603.268
ENSG00000184083.12	FAM120C	240.462	133.073	312.055	1.2307	4.14394e-18	2.14249e-17	130.678	135.468	327.505	294.844	313.817
ENSG00000150510.17	FAM124A	19.8588	11.0438	25.7354	1.22751	0.0234943	0.038511	8.93525	13.1523	31.0984	23.9561	22.1518
ENSG00000152380.10	FAM151B	37.1605	23.2044	46.4645	1.01256	0.00688475	0.0123527	20.1043	26.3045	49.563	39.6197	50.2108
ENSG00000268350.7	FAM156A	134.804	21.4664	210.362	3.29851	0.0010573	0.00214295	10.0522	32.8806	82.6051	400.804	147.679
ENSG00000170264.13	FAM161A	38.5497	17.9435	52.2872	1.53557	0.000111322	0.000255056	20.1043	15.7827	59.2813	41.4624	56.1179
ENSG00000156050.10	FAM161B	158.465	94.8531	200.874	1.08882	2.01253e-10	7.23531e-10	87.1187	102.588	196.308	205.469	200.843
ENSG00000154319.16	FAM167A	162.828	19.0969	258.649	3.78631	6.4269e-39	6.09827e-38	14.5198	23.6741	263.364	238.639	273.944
ENSG00000228300.14	FAM174C	313.802	144.9	426.403	1.55123	5.9509e-31	4.60126e-30	153.016	136.783	418.856	457.93	402.425
ENSG00000151327.13	FAM177A1	1145.81	606.436	1505.39	1.31138	1.36753e-74	2.50472e-73	598.662	614.21	1525.76	1542.4	1447.99
ENSG00000189320.9	FAM180A	63.7291	31.3202	85.335	1.44637	6.63853e-07	1.8764e-06	32.3903	30.2502	86.4924	76.4752	93.0376
ENSG00000214439.4	FAM185BP	12.1389	5.42272	16.6164	1.60963	0.0264902	0.0430709	5.58453	5.2609	15.5492	20.2705	14.0295
ENSG00000255650.6	FAM222A-AS1	23.4397	0	39.0662	7.45661	5.86172e-07	1.66656e-06	0	0	34.0138	39.6197	43.5652
ENSG00000184949.17	FAM227A	93.754	10.5845	149.2	3.85423	3.86536e-23	2.38052e-22	6.70144	14.4675	158.407	147.422	141.772
ENSG00000225828.1	FAM229A	65.564	38.2303	83.7865	1.15153	0.00182503	0.00357598	21.2212	55.2395	100.098	62.6544	88.6072
ENSG00000174137.13	FAM53A	39.4826	13.6742	56.6883	2.08411	1.53794e-06	4.23274e-06	8.93525	18.4132	50.5349	51.5977	67.9322
ENSG00000244026.6	FAM86DP	177.777	72.3063	248.091	1.78439	2.84418e-22	1.70354e-21	67.0144	77.5983	229.351	272.731	242.193
ENSG00000177757.2	FAM87B	30.8114	4.30581	48.4819	3.51298	3.10771e-08	9.71043e-08	3.35072	5.2609	45.6757	56.2047	43.5652
ENSG00000137414.6	FAM8A1	1524.47	653.852	2104.88	1.68554	2.16365e-152	8.59634e-151	664.56	643.145	2105.94	2099.84	2108.85
ENSG00000198690.10	FAN1	727.054	327.957	993.118	1.59439	1.25682e-70	2.15664e-69	342.89	313.024	978.627	1031.95	968.772
ENSG00000179115.11	FARSA	750.122	429.746	963.706	1.1655	3.44995e-46	3.82655e-45	433.36	426.133	957.247	944.422	989.448
ENSG00000169710.9	FASN	1998.09	837.285	2771.95	1.72389	8.54825e-134	2.96985e-132	894.642	779.929	2819.26	2650.83	2845.77
ENSG00000215251.4	FASTKD5	247.129	143.882	315.96	1.13232	9.82781e-17	4.81905e-16	149.666	138.099	308.068	321.564	318.248
ENSG00000127585.12	FBXL16	28.9178	2.33297	46.6411	4.27124	1.09001e-07	3.27326e-07	3.35072	1.31523	49.563	53.4405	36.9197
ENSG00000145743.17	FBXL17	528.434	285.917	690.112	1.26372	2.00555e-35	1.75969e-34	312.734	259.099	708.46	689.198	672.677
ENSG00000260852.1	FBXL19-AS1	73.2487	23.1679	106.636	2.1813	1.80132e-12	7.26859e-12	27.9227	18.4132	117.591	107.802	94.5144
ENSG00000235652.9	FBXO30-DT	47.5893	27.933	60.6934	1.11124	0.000998803	0.00203156	33.5072	22.3588	58.3095	54.3619	69.409
ENSG00000153832.12	FBXO36	38.9693	23.0061	49.6114	1.11223	0.00376399	0.00703959	22.3381	23.6741	57.3376	36.8555	54.6411
ENSG00000204923.4	FBXO48	20.7092	10.7463	27.3512	1.33915	0.0133229	0.0228513	12.286	9.20658	21.3801	34.0913	26.5822
ENSG00000116663.11	FBXO6	39.7177	22.0875	51.4712	1.23735	0.00079283	0.00163276	17.8705	26.3045	47.6194	50.6763	56.1179
ENSG00000174989.13	FBXW8	471.107	270.478	604.859	1.16067	1.47688e-28	1.06736e-27	279.227	261.73	603.503	573.103	637.972
ENSG00000160752.15	FDPS	1148.77	674.165	1465.18	1.11798	3.07997e-46	3.42353e-45	680.196	668.134	1469.4	1557.15	1368.98
ENSG00000145780.8	FEM1C	538.697	306.23	693.675	1.17327	3.02104e-32	2.41668e-31	328.371	284.089	701.657	714.076	665.293
ENSG00000168496.4	FEN1	226.574	109.336	304.733	1.46805	1.12726e-21	6.63385e-21	123.977	94.6962	312.927	298.53	302.741
ENSG00000268388.6	FENDRR	37.2874	7.85485	56.909	2.8569	9.21378e-09	2.9899e-08	7.81835	7.89135	49.563	67.2613	53.9027
ENSG00000149781.13	FERMT3	157.622	90.5108	202.363	1.15986	3.2481e-11	1.22366e-10	91.5864	89.4353	214.773	187.042	205.273
ENSG00000138685.17	FGF2	3232.03	993.187	4724.6	2.24961	0	0	1005.22	981.158	4771.66	4566.4	4835.74
ENSG00000105550.10	FGF21	5.66084	0	9.43474	5.41182	0.0016265	0.00321339	0	0	8.74642	5.52833	14.0295
ENSG00000174721.10	FGFBP3	12.4766	4.40497	17.8576	2.05583	0.0101309	0.0176916	2.23381	6.57613	12.6337	23.9561	16.9831
ENSG00000204315.4	FKBPL	94.4284	54.0289	121.361	1.16537	5.02056e-07	1.43475e-06	58.0792	49.9786	122.45	108.724	132.911
ENSG00000185070.11	FLRT2	19.7084	8.51246	27.1723	1.67969	0.00272952	0.00521053	7.81835	9.20658	25.2674	30.4058	25.8438
ENSG00000217128.12	FNIP1	627.543	253.714	876.762	1.78626	2.14258e-69	3.60863e-68	268.058	239.371	872.698	833.856	923.73
ENSG00000272004.1	FO704657.1	13.0771	4.10749	19.0568	2.19628	0.00644294	0.0116234	5.58453	2.63045	10.6901	22.1133	24.367
ENSG00000188352.12	FOCAD	726.844	347.153	979.971	1.49397	1.31661e-63	2.03398e-62	356.293	338.013	1025.27	962.85	951.789
ENSG00000110203.9	FOLR3	41.0621	0	68.4368	8.26155	1.86417e-08	5.92641e-08	0	0	62.1967	77.3966	65.717
ENSG00000125740.14	FOSB	51.3332	20.4748	71.9055	1.80695	1.18576e-07	3.54834e-07	21.2212	19.7284	70.9432	78.318	66.4554
ENSG00000198815.9	FOXJ3	626.572	386.25	786.787	1.0318	5.88153e-28	4.169e-27	352.943	419.557	810.501	758.302	791.558
ENSG00000184481.17	FOXO4	209.713	129.2	263.389	1.03667	6.52042e-12	2.55136e-11	115.041	143.36	260.449	257.989	271.729
ENSG00000110074.11	FOXRED1	235.198	87.9795	333.344	1.91727	9.60277e-34	8.04297e-33	90.4694	85.4896	340.138	344.599	315.294
ENSG00000276291.5	FRG1HP	141.174	80.7458	181.46	1.15935	7.39153e-10	2.57317e-09	90.4694	71.0222	172.013	194.413	177.953
ENSG00000171877.21	FRMD5	93.6727	9.43105	149.834	3.95744	2.32689e-23	1.44394e-22	12.286	6.57613	148.689	153.872	146.94
ENSG00000265817.4	FSBP	63.5955	38.6793	80.2064	1.03918	0.000199239	0.000443629	45.7932	31.5654	81.6332	79.2393	79.7465
ENSG00000150667.8	FSIP1	33.7152	20.0155	42.8484	1.10254	0.00512281	0.00940831	18.9874	21.0436	46.6476	36.8555	45.042
ENSG00000053108.17	FSTL4	19.1101	4.10749	29.1119	2.79347	5.121e-05	0.000121572	5.58453	2.63045	27.2111	31.3272	28.7974
ENSG00000167996.16	FTH1	27616.8	15279.3	35841.7	1.23003	1.21361e-135	4.27383e-134	15551.8	15006.7	33940	36746.8	36838.5
ENSG00000234975.6	FTH1P2	21.0087	4.46763	32.0361	2.8102	0.0203007	0.0336895	8.93525	0	18.4647	41.4624	36.1813
ENSG00000219507.4	FTH1P8	16.4368	8.51246	21.7197	1.35494	0.0246816	0.0403249	7.81835	9.20658	26.2393	17.5064	21.4134
ENSG00000087086.15	FTL	39116.4	15739.5	54701	1.79719	8.58151e-299	7.82179e-297	15819.9	15659.1	51787.5	56424.9	55890.5
ENSG00000232368.1	FTLP2	15.087	3.6482	22.7128	2.64572	0.00123516	0.00247944	3.35072	3.94568	12.6337	34.0913	21.4134
ENSG00000226608.3	FTLP3	170.15	40.9861	256.259	2.65775	3.87492e-35	3.37314e-34	34.6241	47.3481	257.533	265.36	245.885
ENSG00000068438.15	FTSJ1	594.991	370.269	744.806	1.00945	1.42013e-24	9.12691e-24	355.176	385.361	723.037	806.214	705.166
ENSG00000179163.12	FUCA1	159.984	72.2333	218.485	1.5867	8.4019e-18	4.29378e-17	82.6511	61.8156	215.745	213.762	225.948
ENSG00000163251.4	FZD5	19.8243	6.53962	28.6808	2.12603	0.000576731	0.00120959	7.81835	5.2609	23.3238	25.7989	36.9197
ENSG00000123689.6	G0S2	91.0834	47.985	119.816	1.32813	1.56524e-07	4.63735e-07	44.6763	51.2938	97.1824	134.523	127.742
ENSG00000033327.13	GAB2	404.255	211.569	532.713	1.34287	1.22627e-22	7.42807e-22	179.822	243.317	507.292	499.392	591.453
ENSG00000117308.15	GALE	98.1562	46.3723	132.679	1.51246	4.30403e-11	1.6074e-10	48.027	44.7177	134.112	135.444	128.48
ENSG00000156958.15	GALK2	178.835	105.166	227.947	1.11056	1.18146e-11	4.54827e-11	111.691	98.6419	219.632	244.168	220.041
ENSG00000119514.7	GALNT12	18.7123	9.13357	25.0981	1.41614	0.026972	0.0438037	15.6367	2.63045	26.2393	27.6416	21.4134
ENSG00000115339.14	GALNT3	27.5449	10.9446	38.6117	1.82546	0.000120709	0.000275503	10.0522	11.837	39.8448	36.8555	39.1349
ENSG00000109534.17	GAR1	250.268	81.6121	362.705	2.16815	2.6672e-31	2.07576e-30	65.8975	97.3267	309.04	383.297	395.779
ENSG00000139354.11	GAS2L3	98.019	36.1845	139.242	1.94252	2.61813e-15	1.20487e-14	36.8579	35.5111	143.83	133.601	140.295
ENSG00000157259.8	GATAD1	803.204	429.673	1052.22	1.28832	8.56935e-57	1.17195e-55	448.997	410.35	1055.4	1066.05	1035.23
ENSG00000160221.18	GATD3A	54.4468	30.8871	70.1532	1.16267	0.00168856	0.00332625	44.6763	17.0979	75.8023	57.126	77.5313
ENSG00000280071.4	GATD3B	892.307	537.094	1129.11	1.07401	6.42454e-42	6.47258e-41	520.479	553.71	1083.58	1182.14	1121.62
ENSG00000107862.6	GBF1	1886.36	1086.96	2419.3	1.15499	4.36343e-93	1.01215e-91	1082.28	1091.64	2419.84	2379.94	2458.11
ENSG00000100116.17	GCAT	161.773	84.4305	213.335	1.33781	1.83948e-14	8.15061e-14	86.0018	82.8592	212.83	202.705	224.472
ENSG00000084734.9	GCKR	17.6983	2.53129	27.8097	3.51181	3.19105e-05	7.75492e-05	1.11691	3.94568	30.1266	26.7202	26.5822
ENSG00000089154.11	GCN1	2244.29	1346.18	2843.03	1.07634	6.86249e-77	1.29676e-75	1399.48	1292.87	2927.13	2779.83	2822.14
ENSG00000140297.13	GCNT3	6.62312	0.657613	10.6001	4.12387	0.0103762	0.0180875	0	1.31523	8.74642	11.978	11.0759
ENSG00000196505.11	GDAP2	263.02	127.911	353.092	1.46162	2.1462e-25	1.41272e-24	129.561	126.262	373.18	350.127	335.969
ENSG00000130513.6	GDF15	1294.7	452.763	1855.98	2.03959	1.28614e-156	5.40076e-155	433.36	472.166	1799.82	1844.62	1923.52
ENSG00000183208.12	GDPGP1	40.9015	20.4748	54.5192	1.40995	9.26571e-05	0.000214063	21.2212	19.7284	53.4503	56.2047	53.9027
ENSG00000267348.3	GEMIN7-AS1	6.19222	0	10.3204	5.53436	0.000972842	0.00198084	0	0	6.80277	13.8208	10.3375
ENSG00000239857.7	GET4	431.502	213.594	576.774	1.43429	4.85137e-37	4.41669e-36	208.862	218.327	551.996	616.408	561.918
ENSG00000145990.11	GFOD1	23.0713	9.17007	32.3388	1.83164	0.000706247	0.00146732	7.81835	10.5218	35.9575	24.8775	36.1813
ENSG00000198380.13	GFPT1	4215.51	1981.45	5704.88	1.52477	1.39239e-200	7.733e-199	1999.26	1963.63	5753.2	5850.81	5510.63
ENSG00000115486.12	GGCX	1191.32	648.743	1553.04	1.25558	3.76567e-62	5.67598e-61	692.482	605.004	1595.74	1493.57	1569.82
ENSG00000100031.19	GGT1	32.486	10.6471	47.0453	2.12734	7.84163e-06	2.02039e-05	13.4029	7.89135	36.9293	52.5191	51.6876
ENSG00000204120.16	GIGYF2	1158.44	677.292	1479.2	1.12806	7.51312e-62	1.12697e-60	674.612	679.971	1469.4	1453.03	1515.18
ENSG00000145723.17	GIN1	77.8667	37.2022	104.976	1.49262	2.15556e-08	6.82199e-08	40.2086	34.1959	109.816	92.1388	112.974
ENSG00000010310.9	GIPR	22.7724	12.8183	29.4084	1.20683	0.0132951	0.0228061	11.1691	14.4675	30.1266	28.563	29.5357
ENSG00000198814.13	GK	162.058	62.1447	228.667	1.86779	8.44695e-22	4.98611e-21	70.3651	53.9242	218.66	248.775	218.565
ENSG00000165113.13	GKAP1	16.9366	7.39556	23.2974	1.66507	0.00845827	0.0149562	5.58453	9.20658	25.2674	27.6416	16.9831
ENSG00000109738.11	GLRB	161.689	97.3741	204.566	1.06452	2.61113e-09	8.79555e-09	110.574	84.1744	203.111	189.806	220.78
ENSG00000173221.14	GLRX	1357.15	587.924	1869.97	1.66768	4.00483e-101	9.99273e-100	599.779	576.069	1798.85	2004.94	1806.11
ENSG00000023572.10	GLRX2	363.617	203.929	470.077	1.20395	1.72306e-26	1.16844e-25	206.628	201.229	473.278	464.379	472.572
ENSG00000168237.18	GLYCTK	26.1121	14.9894	33.5272	1.1784	0.0204949	0.0339682	8.93525	21.0436	34.0138	41.4624	25.1054
ENSG00000141404.17	GNAL	15.079	7.75569	19.9612	1.35765	0.0305637	0.0491576	8.93525	6.57613	20.4083	16.585	22.8902
ENSG00000235590.7	GNAS-AS1	5.96619	0	9.94365	5.46918	0.00135376	0.00270246	0	0	13.6055	11.0567	5.16876
ENSG00000185838.14	GNB1L	55.1138	24.9789	75.2038	1.59501	1.11251e-06	3.10321e-06	22.3381	27.6197	87.4642	67.2613	70.8858
ENSG00000159921.20	GNE	480.024	275.927	616.089	1.15446	2.60077e-28	1.86396e-27	299.331	252.523	595.728	614.566	637.972
ENSG00000134697.13	GNL2	965.781	511.546	1268.6	1.30891	6.67458e-69	1.11327e-67	519.362	503.731	1252.68	1300.08	1253.05
ENSG00000163938.17	GNL3	1276.72	782.171	1606.42	1.03944	4.47214e-51	5.52158e-50	767.315	797.026	1545.2	1680.61	1593.45
ENSG00000113552.16	GNPDA1	484.014	239.257	647.185	1.43161	4.89496e-42	4.95087e-41	245.719	232.795	675.418	649.578	616.559
ENSG00000211451.12	GNRHR2	20.2796	2.89143	31.8718	3.40967	3.08413e-05	7.51512e-05	4.46763	1.31523	27.2111	46.9908	21.4134
ENSG00000136935.14	GOLGA1	908.843	347.064	1283.36	1.88997	1.18241e-114	3.44387e-113	335.072	359.056	1255.6	1296.39	1298.1
ENSG00000167110.18	GOLGA2	2238.88	1184.2	2942.01	1.31565	5.50055e-110	1.49791e-108	1120.26	1248.15	2973.78	2913.43	2938.81
ENSG00000225151.10	GOLGA2P7	141.325	85.944	178.245	1.05492	3.41306e-09	1.13855e-08	83.768	88.1201	177.844	175.985	180.906
ENSG00000090615.15	GOLGA3	3166.11	1314.94	4400.22	1.74168	1.40585e-191	7.33456e-190	1329.12	1300.76	4625.88	4248.52	4326.25
ENSG00000144674.16	GOLGA4	3773.61	1469.32	5309.81	1.85149	3.8896e-284	3.22296e-282	1523.46	1415.18	5366.41	5243.62	5319.39
ENSG00000066455.13	GOLGA5	1627.72	951.282	2078.69	1.1277	5.47208e-66	8.71428e-65	966.124	936.44	1968.92	2141.31	2125.84
ENSG00000173230.15	GOLGB1	2951.51	1794.37	3722.94	1.05269	3.77602e-74	6.85121e-73	1765.83	1822.9	3874.66	3756.5	3537.64
ENSG00000166734.20	GOLM2	3205.26	1901.95	4074.14	1.0975	2.80936e-96	6.80173e-95	1983.63	1820.27	4034.04	4050.42	4137.96
ENSG00000143457.11	GOLPH3L	514.431	234.889	700.793	1.57776	1.70713e-52	2.16642e-51	235.667	234.11	667.643	721.447	713.288
ENSG00000111711.10	GOLT1B	1341.65	749.624	1736.33	1.21037	1.47585e-75	2.72566e-74	756.146	743.102	1790.1	1722.07	1696.83
ENSG00000170270.5	GON7	157.945	47.7867	231.385	2.27703	1.14717e-27	8.06875e-27	46.9101	48.6633	215.745	252.46	225.948
ENSG00000108587.16	GOSR1	903.364	441.97	1210.96	1.4539	7.17524e-73	1.275e-71	451.23	432.709	1201.17	1172.01	1259.7
ENSG00000108433.17	GOSR2	1290.44	648.033	1718.71	1.40499	1.32015e-89	2.93062e-88	663.443	632.623	1698.75	1785.65	1671.72
ENSG00000120053.12	GOT1	630.862	337.075	826.721	1.29696	8.06691e-41	7.98701e-40	321.669	352.48	789.121	885.454	805.587
ENSG00000204438.11	GPANK1	271.595	120.552	372.29	1.63009	5.71308e-32	4.53737e-31	116.158	124.946	370.265	372.241	374.366
ENSG00000138678.11	GPAT3	8.89197	0	14.8199	6.05785	0.000138141	0.000313441	0	0	14.5774	12.8994	16.9831
ENSG00000076650.7	GPATCH1	150.18	81.2781	196.115	1.27624	7.26908e-12	2.83072e-11	77.0666	85.4896	205.055	175.064	208.227
ENSG00000136235.17	GPNMB	279.672	62.2177	424.641	2.7841	1.89828e-58	2.65949e-57	54.7284	69.7069	414.969	413.703	445.251
ENSG00000148358.20	GPR107	3354.46	1516.36	4579.86	1.59593	3.7875e-230	2.51877e-228	1489.95	1542.76	4525.79	4592.2	4621.61
ENSG00000184194.6	GPR173	120.831	32.3745	179.801	2.48488	1.31394e-23	8.21942e-23	27.9227	36.8263	193.393	169.535	176.476
ENSG00000152749.8	GPR180	434.212	200.588	589.961	1.56461	3.79482e-39	3.61406e-38	177.588	223.588	617.108	554.675	598.099
ENSG00000181773.7	GPR3	6.02095	1.21607	9.22421	2.92124	0.0278428	0.0450574	1.11691	1.31523	14.5774	6.44971	6.64554
ENSG00000166123.14	GPT2	816.357	327.733	1142.11	1.80001	5.23727e-96	1.26404e-94	330.604	324.861	1180.77	1108.43	1137.13
ENSG00000023171.18	GRAMD1B	84.8342	45.6156	110.98	1.27695	2.00777e-07	5.9078e-07	49.1439	42.0872	119.534	100.431	112.974
ENSG00000075240.17	GRAMD4	170.611	74.1435	234.923	1.66309	5.45259e-21	3.14081e-20	75.9497	72.3374	224.491	239.561	240.716
ENSG00000164284.15	GRPEL2	436.845	195.39	597.814	1.61891	9.61766e-48	1.10553e-46	184.29	206.49	594.756	585.081	613.605
ENSG00000186088.16	GSAP	33.1966	15.0521	45.2929	1.59102	0.000189357	0.000422535	15.6367	14.4675	45.6757	37.7769	52.426
ENSG00000125651.14	GTF2F1	1208.04	667.412	1568.47	1.23521	4.2354e-69	7.0872e-68	637.754	697.069	1547.14	1614.27	1543.98
ENSG00000283050.2	GTF2IP12	108.924	64.2897	138.679	1.11164	2.93267e-05	7.16183e-05	53.6115	74.9678	179.787	126.23	110.021
ENSG00000272645.3	GTF2IP20	74.781	22.7451	109.472	2.28044	6.2134e-13	2.57355e-12	17.8705	27.6197	114.675	120.702	93.0376
ENSG00000172432.19	GTPBP2	1690.23	932.55	2195.35	1.23717	3.26241e-67	5.29886e-66	873.421	991.68	2279.9	2215.02	2091.13
ENSG00000151233.11	GXYLT1	158.048	97.4209	198.467	1.03456	3.1018e-08	9.6939e-08	80.4173	114.425	206.999	208.234	180.168
ENSG00000136732.16	GYPC	316.361	176.789	409.409	1.21821	1.34346e-22	8.13163e-22	164.185	189.392	394.561	412.782	420.884
ENSG00000125812.16	GZF1	531.281	213.37	743.222	1.80658	4.4416e-66	7.0878e-65	196.576	230.164	740.53	753.695	735.44
ENSG00000181218.5	H2AW	38.0162	9.43105	57.073	2.57052	2.03233e-08	6.44514e-08	12.286	6.57613	55.394	58.9688	56.8563
ENSG00000233822.5	H2BC15	57.4588	7.75569	90.5941	3.53406	1.4892e-14	6.63081e-14	8.93525	6.57613	88.436	82.9249	100.422
ENSG00000063854.13	HAGH	485.348	239.033	649.558	1.4467	7.928e-36	6.99968e-35	233.434	244.632	620.996	609.959	717.719
ENSG00000180423.4	HARBI1	54.348	32.8964	68.6491	1.0507	0.000464135	0.00098788	36.8579	28.935	70.9432	70.0255	64.9786
ENSG00000231074.9	HCG18	702.462	260.129	997.35	1.93817	1.89308e-96	4.5977e-95	262.473	257.784	1012.64	976.671	1002.74
ENSG00000180353.11	HCLS1	65.5867	36.1218	85.2299	1.25114	8.45341e-06	2.17187e-05	30.1565	42.0872	80.6614	89.3746	85.6537
ENSG00000143630.10	HCN3	49.314	23.0061	66.8526	1.54138	3.68155e-06	9.77477e-06	22.3381	23.6741	69.9713	62.6544	67.9322
ENSG00000068024.17	HDAC4	167.956	104.78	210.073	1.01301	2.20663e-09	7.45893e-09	93.8202	115.74	208.942	199.02	222.256
ENSG00000094631.21	HDAC6	441.472	240.609	575.381	1.25642	1.94031e-31	1.51385e-30	237.901	243.317	592.813	590.61	542.719
ENSG00000184508.12	HDDC3	161.632	49.3003	236.52	2.27313	1.69637e-28	1.22542e-27	44.6763	53.9242	220.604	238.639	250.315
ENSG00000229056.2	HECW2-AS1	10.4323	1.77452	16.2041	3.16563	0.00185571	0.00363334	2.23381	1.31523	16.521	16.585	15.5063
ENSG00000103657.14	HERC1	694.697	376.709	906.688	1.26877	6.12443e-46	6.76876e-45	364.112	389.307	952.388	869.79	897.887
ENSG00000051108.15	HERPUD1	4915.01	1821.37	6977.44	1.93766	0	0	1817.21	1825.53	6893.15	7153.65	6885.52
ENSG00000069812.11	HES2	21.1125	1.97284	33.8723	4.20853	5.27538e-06	1.38265e-05	0	3.94568	35.9575	33.17	32.4893
ENSG00000164683.18	HEY1	20.0722	7.75569	28.2831	1.86202	0.00134705	0.00269045	8.93525	6.57613	25.2674	24.8775	34.7045
ENSG00000167861.16	HID1	44.9846	1.87368	73.7252	5.34474	7.79435e-10	2.71083e-09	1.11691	2.63045	72.8868	73.711	74.5778
ENSG00000130787.14	HIP1R	209.344	100.636	281.816	1.48852	8.20152e-22	4.84493e-21	96.054	105.218	288.632	279.18	277.636
ENSG00000010818.10	HIVEP2	671.453	416.521	841.407	1.00952	1.67227e-27	1.16615e-26	448.997	384.046	880.473	799.765	843.984
ENSG00000156510.13	HKDC1	31.6657	6.73794	48.2842	2.85845	8.40078e-08	2.54338e-07	5.58453	7.89135	44.7039	50.6763	49.4724
ENSG00000223865.11	HLA-DPB1	213.497	31.6177	334.749	3.41191	3.48273e-50	4.22591e-49	29.0396	34.1959	321.674	358.42	324.155
ENSG00000214922.9	HLA-F-AS1	28.467	8.05317	42.0762	2.40412	8.11734e-06	2.0883e-05	5.58453	10.5218	48.5912	45.148	32.4893
ENSG00000101294.18	HM13	2492.16	1475.26	3170.09	1.1043	3.58651e-90	7.98463e-89	1478.78	1471.74	3083.6	3143.78	3282.9
ENSG00000113161.17	HMGCR	1073.03	593.743	1392.56	1.22877	4.22222e-56	5.71383e-55	600.896	586.59	1471.34	1312.98	1393.35
ENSG00000112972.15	HMGCS1	710.535	344.982	954.236	1.4637	1.29401e-50	1.57879e-49	358.527	331.437	949.472	1026.43	886.811
ENSG00000100292.18	HMOX1	123.727	61.6592	165.106	1.43288	3.75526e-12	1.4859e-11	53.6115	69.7069	164.238	157.557	173.523
ENSG00000233429.9	HOTAIRM1	73.8327	31.3829	102.133	1.68507	5.66469e-09	1.86516e-08	39.0917	23.6741	91.3515	112.409	102.637
ENSG00000100099.21	HPS4	345.424	201.857	441.135	1.12692	2.91185e-21	1.69175e-20	207.745	195.969	451.898	413.703	457.804
ENSG00000135116.9	HRK	47.1472	1.21607	77.7679	6.00265	1.31751e-08	4.23282e-08	1.11691	1.31523	90.3797	80.1607	62.7635
ENSG00000125319.15	HROB	23.2947	11.4039	31.2219	1.45362	0.00387392	0.00723036	12.286	10.5218	28.1829	28.563	36.9197
ENSG00000118960.13	HS1BP3	377.134	189.471	502.243	1.4074	2.05832e-34	1.75433e-33	184.29	194.653	514.095	503.078	489.555
ENSG00000132196.15	HSD17B7	52.733	27.9695	69.2421	1.3065	7.87644e-05	0.000183306	25.6889	30.2502	80.6614	70.9469	56.1179
ENSG00000103160.12	HSDL1	255.17	154.143	322.521	1.0701	1.19921e-15	5.59354e-15	145.198	163.088	317.787	323.407	326.37
ENSG00000155304.6	HSPA13	2029.46	813.345	2840.2	1.80216	5.88048e-203	3.36229e-201	830.979	795.711	2856.19	2863.67	2800.73
ENSG00000204388.7	HSPA1B	858.416	497.387	1099.1	1.14511	5.26585e-51	6.48603e-50	493.673	501.101	1081.64	1099.22	1116.45
ENSG00000044574.9	HSPA5	47651	9281.19	73230.9	2.97981	0	0	9492.59	9069.79	70761.4	76224.6	72706.7
ENSG00000215895.4	HSPA5P1	23.7854	3.35072	37.4084	3.38754	2.26018e-06	6.1205e-06	6.70144	0	37.9011	39.6197	34.7045
ENSG00000113013.16	HSPA9	8035.28	2635.29	11635.3	2.14294	0	0	2604.63	2665.96	11475.3	11877.6	11552.9
ENSG00000169087.11	HSPBAP1	99.1725	34.5718	142.24	2.02547	6.0151e-16	2.84766e-15	40.2086	28.935	146.745	141.894	138.08
ENSG00000255154.9	HTD2	130.669	65.1456	174.351	1.42483	0.00549194	0.0100327	51.3777	78.9135	100.098	188.884	234.071
ENSG00000135914.6	HTR2B	10.9986	1.67536	17.214	3.28538	0.00221314	0.00428444	3.35072	0	10.6901	16.585	24.367
ENSG00000086758.16	HUWE1	3144.64	1785.31	4050.87	1.18257	1.92936e-52	2.44444e-51	1734.56	1836.05	4409.17	3661.59	4081.84
ENSG00000114378.17	HYAL1	45.7249	14.8538	66.3057	2.13819	3.69434e-08	1.14694e-07	17.8705	11.837	67.0559	72.7896	59.0715
ENSG00000186792.17	HYAL3	109.272	16.9258	170.836	3.33337	6.10806e-26	4.09361e-25	16.7536	17.0979	172.985	185.199	154.324
ENSG00000188266.14	HYKK	70.5137	30.5008	97.189	1.67995	1.38723e-08	4.44758e-08	26.8058	34.1959	86.4924	114.252	90.8224
ENSG00000149428.19	HYOU1	3351.81	1884.15	4330.25	1.201	2.06227e-143	7.69996e-142	1873.05	1895.24	4350.86	4271.55	4368.34
ENSG00000242028.8	HYPK	619.197	356.406	794.39	1.16112	3.36597e-22	2.00831e-21	326.137	386.676	688.052	876.24	818.879
ENSG00000108622.11	ICAM2	56.4169	16.8893	82.7686	2.25546	9.07212e-10	3.13708e-09	24.5719	9.20658	80.6614	89.3746	78.2697
ENSG00000076662.10	ICAM3	110.667	48.9401	151.818	1.64811	1.99924e-12	8.04213e-12	41.3255	56.5547	152.576	134.523	168.354
ENSG00000138413.14	IDH1	1615.48	838.955	2133.16	1.34737	1.61632e-100	4.01359e-99	838.797	839.114	2075.82	2117.35	2206.32
ENSG00000067064.12	IDI1	1037.02	360.321	1488.15	2.03867	2.70036e-115	7.89474e-114	393.151	327.491	1542.29	1507.39	1414.76
ENSG00000134049.6	IER3IP1	574.039	329.418	737.119	1.16629	4.55547e-36	4.04742e-35	311.617	347.219	742.474	722.368	746.516
ENSG00000006652.15	IFRD1	1748.94	841.497	2353.91	1.48529	1.88296e-128	6.22101e-127	817.576	865.418	2366.39	2393.77	2301.57
ENSG00000138002.16	IFT172	341.639	174.059	453.359	1.38294	6.84366e-29	4.99494e-28	165.302	182.816	481.053	444.109	434.914
ENSG00000103742.12	IGDCC4	224.662	20.3756	360.853	4.13658	9.29199e-54	1.21384e-52	22.3381	18.4132	355.688	362.105	364.766
ENSG00000095574.12	IKZF5	273.696	147.828	357.609	1.27169	9.05447e-22	5.33862e-21	149.666	145.99	371.237	357.498	344.091
ENSG00000174564.13	IL20RB	29.0009	15.8089	37.7955	1.26294	0.00320263	0.00605548	14.5198	17.0979	38.873	36.8555	37.6581
ENSG00000008517.18	IL32	163.7	75.3596	222.593	1.55876	2.32821e-18	1.21753e-17	77.0666	73.6526	226.435	229.426	211.919
ENSG00000267100.1	ILF3-DT	154.143	73.8095	207.698	1.48022	7.43953e-15	3.35884e-14	87.1187	60.5004	196.308	215.605	211.181
ENSG00000105135.16	ILVBL	832.139	445.926	1089.61	1.29106	5.19567e-59	7.37243e-58	428.892	462.959	1109.82	1085.39	1073.62
ENSG00000136718.10	IMP4	687.926	314.977	936.559	1.56996	1.45014e-69	2.44503e-68	326.137	303.817	923.233	936.13	950.313
ENSG00000148798.11	INA	138.285	85.1873	173.684	1.0251	2.11972e-08	6.71266e-08	84.8849	85.4896	184.647	173.221	163.185
ENSG00000139269.3	INHBE	1787.57	38.0582	2953.91	6.27918	1.87761e-238	1.30464e-236	37.9748	38.1415	2792.05	3026.76	3042.92
ENSG00000114933.16	INO80D	205.702	128.11	257.431	1.00405	6.93527e-11	2.55862e-10	127.327	128.892	282.801	248.775	240.716
ENSG00000185133.14	INPP5J	31.3615	15.9707	41.622	1.36303	0.00139434	0.00277668	20.1043	11.837	39.8448	45.148	39.8733
ENSG00000186480.13	INSIG1	1035.85	253.876	1557.17	2.6095	1.63807e-184	8.16136e-183	273.642	234.11	1554.92	1582.94	1533.64
ENSG00000125629.15	INSIG2	785.877	400.336	1042.9	1.38345	1.94179e-62	2.94692e-61	394.268	406.405	1040.82	1013.53	1074.36
ENSG00000161896.12	IP6K3	15.3605	6.08033	21.5472	1.8326	0.00516807	0.00948468	5.58453	6.57613	23.3238	18.4278	22.8902
ENSG00000086200.17	IPO11	423.761	215.828	562.383	1.3829	1.3197e-37	1.22009e-36	213.329	218.327	568.517	550.068	568.563
ENSG00000196497.17	IPO4	422.638	239.779	544.545	1.17936	5.65051e-28	4.00707e-27	254.655	224.904	528.672	555.597	549.365
ENSG00000127080.10	IPPK	247.188	147.765	313.469	1.08913	1.9432e-15	8.97732e-15	142.964	152.566	312.927	300.372	327.108
ENSG00000160051.12	IQCC	24.9487	11.3047	34.0447	1.5734	0.00139375	0.00277586	13.4029	9.20658	38.873	32.2486	31.0125
ENSG00000174628.16	IQCK	62.5363	26.7796	86.3742	1.65893	8.87194e-07	2.48951e-06	39.0917	14.4675	86.4924	88.4532	84.1769
ENSG00000124313.18	IQSEC2	241.848	140.531	309.392	1.13808	1.48445e-16	7.22865e-16	142.964	138.099	311.956	299.451	316.771
ENSG00000134070.5	IRAK2	42.5843	16.3673	60.0624	1.88413	1.14999e-06	3.20256e-06	15.6367	17.0979	57.3376	53.4405	69.409
ENSG00000090376.11	IRAK3	365.538	154.096	506.499	1.70642	1.23605e-37	1.14344e-36	175.354	132.838	482.997	541.776	494.724
ENSG00000167378.8	IRGQ	275.479	138.919	366.519	1.39665	4.10375e-24	2.60072e-23	146.315	131.523	342.082	386.061	371.412
ENSG00000185950.9	IRS2	467.988	213.871	637.4	1.56595	1.11209e-35	9.79639e-35	250.187	177.555	644.319	602.588	665.293
ENSG00000176842.15	IRX5	19.3197	2.99059	30.2059	3.33156	1.87022e-05	4.63739e-05	3.35072	2.63045	26.2393	26.7202	37.6581
ENSG00000184916.9	JAG2	13.6737	4.86426	19.5467	2.01391	0.00490603	0.00902945	4.46763	5.2609	21.3801	16.585	20.675
ENSG00000070495.15	JMJD6	529.469	278.991	696.455	1.31866	5.21757e-42	5.27029e-41	287.045	270.936	683.192	692.884	713.288
ENSG00000152409.9	JMY	910.092	364.971	1273.51	1.8026	1.24489e-108	3.35471e-107	362.995	366.948	1287.67	1287.18	1245.67
ENSG00000232593.7	KANTR	28.3092	12.3225	38.9669	1.63384	0.00150892	0.00299407	16.7536	7.89135	53.4503	29.4844	33.9661
ENSG00000107821.15	KAZALD1	172.674	80.3127	234.248	1.52846	3.06559e-14	1.34527e-13	102.755	57.8699	231.294	221.133	250.315
ENSG00000176595.4	KBTBD11	8.89251	0.657613	14.3824	4.565	0.00354523	0.0066602	0	1.31523	10.6901	18.4278	14.0295
ENSG00000116396.15	KCNC4	52.3841	12.62	78.8936	2.64029	5.6565e-10	1.98432e-09	13.4029	11.837	94.2669	55.2833	87.1305
ENSG00000182324.7	KCNJ14	19.5538	10.0887	25.8639	1.34079	0.0147197	0.0250777	12.286	7.89135	24.2956	30.4058	22.8902
ENSG00000123700.5	KCNJ2	11.8621	1.97284	18.4549	3.31581	0.00114167	0.00230441	0	3.94568	22.352	17.5064	15.5063
ENSG00000135253.15	KCP	62.935	3.54904	102.526	4.82443	1.1997e-14	5.36334e-14	4.46763	2.63045	106.901	95.8243	104.852
ENSG00000213859.8	KCTD11	689.276	414.642	872.365	1.07829	3.2528e-35	2.84115e-34	388.684	440.6	850.346	872.554	894.195
ENSG00000243335.10	KCTD7	410.022	163.537	574.346	1.8091	2.74242e-48	3.19263e-47	165.302	161.773	583.095	609.037	530.905
ENSG00000100196.11	KDELR3	1600.31	967.796	2021.99	1.06485	1.00454e-69	1.70113e-68	950.488	985.104	1988.35	2008.63	2068.98
ENSG00000107077.19	KDM4C	462.825	266.668	593.597	1.15372	5.84245e-30	4.40101e-29	270.291	263.045	575.32	611.801	593.669
ENSG00000132510.11	KDM6B	502.775	265.859	660.72	1.31834	5.12438e-36	4.54767e-35	242.369	289.35	689.995	650.5	641.664
ENSG00000119537.18	KDSR	1156.53	690.846	1466.99	1.08412	3.45645e-48	4.01482e-47	729.34	652.352	1473.29	1408.8	1518.88
ENSG00000132680.11	KHDC4	597.634	339.94	769.43	1.18292	5.16552e-35	4.48151e-34	311.617	368.263	785.234	779.494	743.562
ENSG00000164542.13	KIAA0895	35.3337	17.9435	46.9271	1.37206	0.00075901	0.00157147	20.1043	15.7827	55.394	46.9908	38.3965
ENSG00000197077.13	KIAA1671	110.095	56.4975	145.826	1.37462	1.22396e-10	4.44671e-10	52.4946	60.5004	147.717	139.13	150.632
ENSG00000089177.19	KIF16B	95.86	41.7429	131.938	1.67211	2.56861e-11	9.73357e-11	33.5072	49.9786	144.802	129.916	121.097
ENSG00000186638.16	KIF24	26.5266	14.3945	34.6148	1.25619	0.00591775	0.0107498	15.6367	13.1523	39.8448	32.2486	31.7509
ENSG00000165115.15	KIF27	83.7448	45.3181	109.363	1.26083	7.42004e-07	2.09119e-06	52.4946	38.1415	97.1824	121.623	109.282
ENSG00000227398.4	KIF9-AS1	55.4014	29.5092	72.6629	1.28041	5.40736e-05	0.000128049	37.9748	21.0436	71.915	73.711	72.3626
ENSG00000137171.15	KLC4	454.468	196.209	626.641	1.67492	8.92237e-46	9.84001e-45	189.874	202.545	671.531	630.229	578.162
ENSG00000169926.11	KLF13	1259.36	724.702	1615.8	1.16118	3.7859e-51	4.67803e-50	681.313	768.092	1568.52	1567.28	1711.6
ENSG00000163884.4	KLF15	82.7784	27.0771	119.913	2.12893	1.79985e-11	6.87591e-11	35.741	18.4132	95.2388	123.466	141.033
ENSG00000136826.15	KLF4	543.347	184.247	782.747	2.09166	4.32198e-82	8.74407e-81	176.471	192.023	754.136	791.472	802.634
ENSG00000128607.14	KLHDC10	1035.51	492.45	1397.54	1.50406	2.68448e-87	5.8014e-86	504.842	480.057	1349.86	1408.8	1433.96
ENSG00000130487.9	KLHDC7B	43.6202	7.95401	67.3977	3.10178	8.37774e-11	3.07396e-10	6.70144	9.20658	62.1967	65.4185	74.5778
ENSG00000174010.9	KLHL15	184.762	76.9358	256.646	1.7311	1.31491e-22	7.96192e-22	81.5342	72.3374	279.885	244.168	245.885
ENSG00000179454.14	KLHL28	380.881	169.592	521.741	1.62574	1.60718e-40	1.57417e-39	156.367	182.816	547.137	515.977	502.108
ENSG00000118058.23	KMT2A	877.198	513.107	1119.93	1.12803	9.04734e-32	7.15247e-31	486.971	539.242	1223.53	1015.37	1120.88
ENSG00000055609.20	KMT2C	663.612	381.015	852.011	1.1619	8.24406e-34	6.91617e-33	367.462	394.568	922.261	805.293	828.478
ENSG00000133247.14	KMT5C	66.7703	41.3462	83.7197	1.02762	0.000158032	0.000356227	37.9748	44.7177	74.8305	84.7677	91.5608
ENSG00000001631.16	KRIT1	486.481	295.295	613.938	1.05542	1.65089e-27	1.15228e-26	295.98	294.61	607.39	627.465	606.96
ENSG00000171346.16	KRT15	7.54022	0	12.567	5.81946	0.000355908	0.000770008	0	0	8.74642	15.6636	13.2911
ENSG00000233930.4	KRTAP5-AS1	25.3376	4.10749	39.4911	3.23369	8.50228e-07	2.38881e-06	5.58453	2.63045	40.8166	34.0913	43.5652
ENSG00000100395.15	L3MBTL2	447.786	241.355	585.407	1.27193	2.16035e-30	1.64414e-29	259.122	223.588	575.32	621.937	558.964
ENSG00000196976.7	LAGE3	162.109	68.4233	224.567	1.7107	2.93407e-20	1.64663e-19	73.7158	63.1308	211.858	224.819	237.024
ENSG00000101680.15	LAMA1	134.882	27.4737	206.488	2.89639	2.10083e-30	1.59963e-29	31.2734	23.6741	201.168	213.762	204.535
ENSG00000078081.8	LAMP3	24.1141	1.77452	39.0072	4.4301	1.11128e-06	3.10033e-06	2.23381	1.31523	37.9011	41.4624	37.6581
ENSG00000109270.13	LAMTOR3	512.294	260.04	680.463	1.39391	3.07776e-42	3.13131e-41	241.252	278.828	657.925	693.805	689.66
ENSG00000224699.9	LAMTOR5-AS1	6.76819	1.77452	10.0973	2.48678	0.0261956	0.0426321	2.23381	1.31523	11.6619	8.29249	10.3375
ENSG00000155506.18	LARP1	3441.92	2055.85	4365.97	1.0862	1.71268e-110	4.69699e-109	2079.68	2032.02	4425.69	4252.2	4420.02
ENSG00000138709.19	LARP1B	366.973	132.838	523.063	1.97277	2.58937e-52	3.26462e-51	140.73	124.946	498.546	546.383	524.26
ENSG00000213658.12	LAT	65.6969	38.1208	84.081	1.12587	8.24899e-05	0.000191459	44.6763	31.5654	96.2106	79.2393	76.7929
ENSG00000162194.12	LBHD1	99.1648	24.4831	148.953	2.59478	1.64653e-20	9.33175e-20	27.9227	21.0436	139.943	147.422	159.493
ENSG00000257702.3	LBX2-AS1	15.6488	7.2964	21.2171	1.54803	0.0130402	0.0223962	6.70144	7.89135	18.4647	23.0347	22.1518
ENSG00000157578.14	LCA5L	34.2694	7.2964	52.2515	2.8472	2.68363e-08	8.43293e-08	6.70144	7.89135	57.3376	46.9908	52.426
ENSG00000178177.16	LCORL	98.1629	48.1468	131.507	1.44493	3.15956e-10	1.12391e-09	50.2608	46.0329	140.915	124.387	129.219
ENSG00000166816.15	LDHD	79.8444	7.19724	128.276	4.14556	6.34899e-20	3.52229e-19	7.81835	6.57613	128.281	131.758	124.789
ENSG00000104660.19	LEPROTL1	868.503	504.151	1111.4	1.14027	1.8016e-49	2.15068e-48	513.777	494.525	1092.33	1097.37	1144.51
ENSG00000145685.14	LHFPL2	1267.03	669.212	1665.57	1.31637	1.27827e-85	2.70584e-84	654.507	683.917	1671.54	1692.59	1632.59
ENSG00000128342.5	LIF	294.419	141.424	396.416	1.48997	1.25736e-28	9.1126e-28	132.912	149.936	418.856	387.904	382.488
ENSG00000105486.14	LIG1	102.246	53.9297	134.457	1.31331	3.60223e-09	1.19881e-08	59.1961	48.6633	126.337	134.523	142.51
ENSG00000205659.11	LIN52	140.415	78.773	181.51	1.19411	6.30913e-10	2.20627e-09	90.4694	67.0765	192.421	166.771	185.337
ENSG00000104863.12	LIN7B	35.4768	18.241	46.9673	1.37323	0.00045664	0.000972863	16.7536	19.7284	46.6476	43.3052	50.9492
ENSG00000231721.7	LINC-PINT	43.8577	27.4111	54.8221	1.0065	0.00297554	0.00565162	24.5719	30.2502	60.2531	48.8336	55.3795
ENSG00000179406.8	LINC00174	95.8213	51.0748	125.652	1.29898	7.52946e-08	2.28763e-07	46.9101	55.2395	137.027	133.601	106.329
ENSG00000224843.8	LINC00240	12.373	5.52188	16.9403	1.62634	0.0244687	0.0400151	4.46763	6.57613	16.521	20.2705	14.0295
ENSG00000214894.6	LINC00243	13.7202	2.33297	21.3117	3.1515	0.000353817	0.000765697	3.35072	1.31523	20.4083	22.1133	21.4134
ENSG00000237879.1	LINC00398	7.69927	0	12.8321	5.85521	0.000329142	0.000714294	0	0	9.71824	11.0567	17.7214
ENSG00000258791.9	LINC00520	197.821	1.21607	328.891	8.09033	3.18602e-15	1.46058e-14	1.11691	1.31523	319.73	324.328	342.615
ENSG00000223685.6	LINC00571	12.0793	1.21607	19.3215	3.99354	0.000656351	0.0013688	1.11691	1.31523	26.2393	14.7422	16.9831
ENSG00000226808.3	LINC00840	13.03	5.98117	17.7292	1.55599	0.0234318	0.0384167	6.70144	5.2609	19.4365	17.5064	16.2447
ENSG00000233058.2	LINC00884	51.3915	28.8881	66.3938	1.19148	0.000230869	0.000510316	30.1565	27.6197	75.8023	67.2613	56.1179
ENSG00000240024.5	LINC00888	111.018	67.5047	140.026	1.04815	6.78289e-07	1.91615e-06	69.2482	65.7613	157.436	128.994	133.649
ENSG00000236499.2	LINC00896	11.3142	4.20665	16.0526	1.92293	0.0136651	0.0233967	4.46763	3.94568	18.4647	15.6636	14.0295
ENSG00000231711.2	LINC00899	47.2094	26.3933	61.0868	1.2268	0.000260475	0.000572003	21.2212	31.5654	56.3658	62.6544	64.2402
ENSG00000281005.1	LINC00921	13.372	5.98117	18.2992	1.60178	0.0187926	0.0313852	6.70144	5.2609	20.4083	17.5064	16.9831
ENSG00000249628.3	LINC00942	19.1076	1.87368	30.5969	4.06826	1.32305e-05	3.33398e-05	1.11691	2.63045	34.9857	29.4844	27.3206
ENSG00000235314.1	LINC00957	93.7826	19.5562	143.267	2.88999	2.23468e-19	1.21752e-18	16.7536	22.3588	116.619	152.95	160.231
ENSG00000204054.14	LINC00963	527.133	305.953	674.586	1.14593	1.03643e-31	8.17277e-31	287.045	324.861	652.094	686.434	685.229
ENSG00000230724.9	LINC01001	42.3438	17.9435	58.6107	1.69422	8.28863e-06	2.1306e-05	20.1043	15.7827	59.2813	66.3399	50.2108
ENSG00000261455.1	LINC01003	30.7459	8.71078	45.436	2.41689	1.88115e-06	5.13086e-06	5.58453	11.837	39.8448	46.9908	49.4724
ENSG00000268754.4	LINC01081	28.3313	4.86426	43.976	3.18551	1.52456e-07	4.52203e-07	4.46763	5.2609	40.8166	46.0694	45.042
ENSG00000228794.10	LINC01128	357.933	174.78	480.035	1.4595	3.59221e-35	3.13056e-34	172.004	177.555	473.278	480.964	485.863
ENSG00000236423.6	LINC01134	16.1311	3.1889	24.7593	3.00934	0.000373247	0.0008046	1.11691	5.2609	34.9857	15.6636	23.6286
ENSG00000203999.9	LINC01270	55.0367	21.3307	77.5073	1.86892	2.28694e-08	7.22156e-08	18.9874	23.6741	85.5205	70.9469	76.0545
ENSG00000204792.2	LINC01291	25.0694	12.8183	33.2369	1.38178	0.00593547	0.0107782	11.1691	14.4675	41.7884	23.9561	33.9661
ENSG00000230836.1	LINC01293	30.5331	0	50.8884	7.83549	1.13228e-07	3.39619e-07	0	0	49.563	50.6763	52.426
ENSG00000225975.7	LINC01534	28.801	5.16174	44.5606	3.17921	5.27172e-07	1.50323e-06	1.11691	9.20658	53.4503	39.6197	40.6117
ENSG00000220804.8	LINC01881	31.3646	14.8903	42.3475	1.525	0.000972014	0.00197967	10.0522	19.7284	53.4503	35.9341	37.6581
ENSG00000235385.2	LINC02154	11.1079	2.99059	16.5194	2.44524	0.00712679	0.0127546	3.35072	2.63045	24.2956	15.6636	9.59912
ENSG00000262155.2	LINC02175	11.4726	4.30581	16.2504	1.93698	0.0127024	0.0218523	3.35072	5.2609	15.5492	14.7422	18.4598
ENSG00000260923.7	LINC02193	41.7324	22.8078	54.3487	1.2483	0.000618218	0.00129258	24.5719	21.0436	61.2249	44.2266	57.5947
ENSG00000215241.4	LINC02449	24.8387	13.1784	32.6123	1.30322	0.00623528	0.011275	14.5198	11.837	34.0138	27.6416	36.1813
ENSG00000234155.1	LINC02535	16.6979	7.59387	22.7672	1.6117	0.0170061	0.0286329	3.35072	11.837	30.1266	21.1919	16.9831
ENSG00000273142.1	LINC02604	37.3512	20.7723	48.4039	1.22533	0.00136148	0.00271647	17.8705	23.6741	55.394	46.9908	42.8268
ENSG00000212719.13	LINC02693	603.095	328.129	786.405	1.26253	1.24567e-43	1.31036e-42	326.137	330.122	784.262	765.673	809.279
ENSG00000079435.10	LIPE	38.0136	12.2233	55.2072	2.14018	1.17473e-06	3.26737e-06	17.8705	6.57613	50.5349	58.9688	56.1179
ENSG00000164187.7	LMBRD2	771.653	416.73	1008.27	1.2717	5.18423e-48	5.98582e-47	424.425	409.035	1069.98	994.177	960.65
ENSG00000100258.18	LMF2	1529.53	806.273	2011.71	1.31773	2.48292e-89	5.50398e-88	836.563	775.983	1979.61	1975.46	2080.05
ENSG00000185621.11	LMLN	270.297	93.0056	388.492	2.05462	1.40921e-41	1.41606e-40	100.522	85.4896	408.166	374.083	383.226
ENSG00000257219.6	LNCOG	124.918	18.6011	195.795	3.38635	2.33971e-30	1.77889e-29	20.1043	17.0979	194.365	205.469	187.552
ENSG00000196365.12	LONP1	2525.75	1352.55	3307.88	1.29344	3.51392e-59	5.00443e-58	1201.79	1503.3	3286.71	3254.34	3382.58
ENSG00000154359.13	LONRF1	185.025	62.7396	266.548	2.08384	8.46936e-30	6.35202e-29	63.6637	61.8156	283.773	258.91	256.961
ENSG00000153395.10	LPCAT1	1019.7	545.633	1335.74	1.29303	1.95063e-61	2.90068e-60	542.817	548.449	1350.84	1262.3	1394.09
ENSG00000134324.12	LPIN1	646.7	400.613	810.759	1.01239	2.28581e-28	1.64432e-27	435.594	365.633	795.924	807.136	829.216
ENSG00000121931.16	LRIF1	323.718	196.11	408.79	1.06096	2.55163e-19	1.38874e-18	190.991	201.229	409.138	415.546	401.686
ENSG00000198799.12	LRIG2	255.595	125.839	342.099	1.43989	3.39567e-25	2.22008e-24	130.678	121.001	341.11	341.835	343.353
ENSG00000157193.18	LRP8	166.334	48.507	244.885	2.32495	1.09215e-30	8.36113e-30	53.6115	43.4024	253.646	243.246	237.763
ENSG00000148814.18	LRRC27	212.004	127.812	268.133	1.06988	7.25729e-13	2.99632e-12	130.678	124.946	264.336	254.303	285.758
ENSG00000171757.17	LRRC34	21.6219	11.6022	28.3018	1.2842	0.020685	0.0342722	10.0522	13.1523	34.0138	33.17	17.7214
ENSG00000214425.8	LRRC37A4P	32.4535	15.1512	43.9883	1.53411	0.000389205	0.000836555	14.5198	15.7827	52.4785	43.3052	36.1813
ENSG00000204052.4	LRRC73	35.4773	6.93626	54.5047	3.02674	3.46574e-08	1.07878e-07	3.35072	10.5218	48.5912	46.9908	67.9322
ENSG00000162620.16	LRRIQ3	21.9283	12.4216	28.2662	1.16571	0.0225505	0.0371013	15.6367	9.20658	28.1829	32.2486	24.367
ENSG00000188906.17	LRRK2	137.769	85.8449	172.384	1.00495	2.58833e-08	8.14337e-08	84.8849	86.8049	176.872	174.142	166.139
ENSG00000213903.9	LTB4R	76.5865	40.1302	100.891	1.32838	3.56047e-06	9.47278e-06	36.8579	43.4024	112.732	112.409	77.5313
ENSG00000213906.10	LTB4R2	28.365	14.4936	37.6125	1.3773	0.00179551	0.0035226	14.5198	14.4675	38.873	34.0913	39.8733
ENSG00000198862.14	LTN1	824.292	371.547	1126.12	1.60065	8.90037e-83	1.81701e-81	362.995	380.1	1135.09	1145.28	1097.99
ENSG00000248323.7	LUCAT1	34.5048	1.87368	56.2588	4.94954	2.34422e-08	7.39639e-08	1.11691	2.63045	58.3095	61.733	48.734
ENSG00000153714.6	LURAP1L	835.067	433.666	1102.67	1.34987	1.23098e-61	1.83935e-60	418.84	448.492	1095.25	1073.42	1139.34
ENSG00000154589.7	LY96	237.817	102.771	327.848	1.67534	2.34191e-29	1.73129e-28	101.639	103.903	323.617	326.171	333.754
ENSG00000124466.9	LYPD3	9.23504	2.43213	13.7703	2.51616	0.00914863	0.0160924	2.23381	2.63045	10.6901	12.8994	17.7214
ENSG00000143353.12	LYPLAL1	173.128	104.248	219.048	1.06602	1.07727e-10	3.92668e-10	107.223	101.272	231.294	222.054	203.797
ENSG00000228063.2	LYPLAL1-DT	26.368	6.99892	39.2807	2.45179	9.63887e-06	2.46053e-05	10.0522	3.94568	35.9575	44.2266	37.6581
ENSG00000176018.13	LYSMD3	671.459	393.724	856.616	1.12118	1.05299e-36	9.51372e-36	402.086	385.361	810.501	883.611	875.735
ENSG00000143669.14	LYST	377.386	226.35	478.076	1.08207	2.50555e-21	1.45953e-20	213.329	239.371	502.433	457.008	474.787
ENSG00000163818.18	LZTFL1	350.544	176.987	466.248	1.40431	3.00733e-31	2.33812e-30	161.951	192.023	461.617	468.986	468.142
ENSG00000204178.11	MACO1	525.202	318.787	662.812	1.05388	2.19502e-27	1.52725e-26	335.072	302.502	635.573	669.849	683.014
ENSG00000197063.11	MAFG	1171.28	568.487	1573.15	1.47171	1.43218e-85	3.02752e-84	537.232	599.743	1628.78	1523.05	1567.61
ENSG00000265688.2	MAFG-DT	71.8761	36.3463	95.5626	1.37916	5.00979e-07	1.43196e-06	42.4425	30.2502	99.1261	100.431	87.1305
ENSG00000187601.5	MAGEH1	610.664	190.688	890.648	2.22617	1.2615e-90	2.8247e-89	185.407	195.969	838.684	947.187	886.072
ENSG00000176909.12	MAMSTR	22.6032	11.2056	30.2016	1.41145	0.00626525	0.0113226	14.5198	7.89135	26.2393	34.0913	30.2741
ENSG00000117643.15	MAN1C1	88.9431	42.5623	119.864	1.50051	5.52801e-10	1.941e-09	39.0917	46.0329	121.478	117.016	121.097
ENSG00000185090.15	MANEAL	66.7835	7.95401	106.003	3.75283	1.90731e-16	9.23556e-16	6.70144	9.20658	91.3515	122.545	104.114
ENSG00000140941.14	MAP1LC3B	8254.72	2292.47	12229.6	2.41582	0	0	2266.2	2318.74	12018.6	12609.2	12060.9
ENSG00000258102.5	MAP1LC3B2	82.3171	25.934	119.906	2.23186	4.43637e-14	1.93475e-13	18.9874	32.8806	109.816	131.758	118.143
ENSG00000073803.14	MAP3K13	323.542	192.948	410.605	1.08584	8.6011e-19	4.58144e-18	204.394	181.501	424.687	386.983	420.146
ENSG00000135525.18	MAP7	18.3342	5.52188	26.8758	2.29807	0.000437738	0.000934778	4.46763	6.57613	22.352	33.17	25.1054
ENSG00000164114.19	MAP9	730.04	307.393	1011.8	1.72042	2.76205e-85	5.82286e-84	300.448	314.339	1013.61	1015.37	1006.43
ENSG00000156711.17	MAPK13	61.7738	34.8066	79.7518	1.20302	3.13249e-05	7.62337e-05	30.1565	39.4568	87.4642	76.4752	75.3162
ENSG00000162510.6	MATN1	11.1071	0	18.5118	6.37471	4.12155e-05	9.89669e-05	0	0	18.4647	19.3491	17.7214
ENSG00000186056.10	MATN1-AS1	53.2876	9.53021	82.4591	3.09265	8.42271e-13	3.4618e-12	11.1691	7.89135	91.3515	82.9249	73.101
ENSG00000125952.20	MAX	1020.33	584.537	1310.85	1.16487	1.09674e-52	1.39753e-51	600.896	568.177	1251.71	1314.82	1366.03
ENSG00000129071.10	MBD4	591.397	284.027	796.311	1.49037	1.51814e-56	2.07073e-55	274.759	293.295	795.924	785.944	807.064
ENSG00000124370.11	MCEE	125.528	77.4316	157.592	1.02793	9.50838e-08	2.86806e-07	75.9497	78.9135	145.774	166.771	160.231
ENSG00000053524.12	MCF2L2	8.84261	1.67536	13.6208	2.93342	0.0076331	0.0135776	3.35072	0	16.521	14.7422	9.59912
ENSG00000090674.16	MCOLN1	270.404	151.017	349.995	1.21575	1.17399e-18	6.21276e-18	150.782	151.251	320.702	355.656	373.627
ENSG00000172366.20	MCRIP2	113.116	68.9191	142.581	1.05107	1.9677e-07	5.79317e-07	68.1313	69.7069	144.802	134.523	148.417
ENSG00000005059.16	MCUB	85.1354	38.3192	116.346	1.59195	3.38877e-10	1.20351e-09	42.4425	34.1959	124.393	112.409	112.236
ENSG00000137337.15	MDC1	470.842	133.955	695.434	2.36917	4.53551e-83	9.30831e-82	142.964	124.946	721.094	683.67	681.537
ENSG00000014641.21	MDH1	1957.26	1082.06	2540.72	1.23064	6.28309e-97	1.52836e-95	1085.63	1078.48	2528.69	2625.03	2468.45
ENSG00000133398.4	MED10	519.654	279.674	679.64	1.27523	3.13945e-33	2.58205e-32	301.565	257.784	654.038	726.975	657.909
ENSG00000108590.11	MED31	135.119	81.8992	170.598	1.05291	1.65733e-08	5.28512e-08	84.8849	78.9135	176.872	176.906	158.016
ENSG00000229431.1	MED8-AS1	21.4232	1.77452	34.5223	4.25566	4.11312e-06	1.08666e-05	2.23381	1.31523	37.9011	29.4844	36.1813
ENSG00000102802.10	MEDAG	1077.49	565.93	1418.53	1.33103	3.95647e-67	6.41271e-66	521.595	610.265	1405.26	1413.41	1436.91
ENSG00000167077.13	MEI1	15.74	2.63045	24.4797	3.31387	0.00016284	0.000366383	0	5.2609	22.352	26.7202	24.367
ENSG00000037897.17	METTL1	161.439	89.8271	209.181	1.22981	1.61973e-11	6.2077e-11	77.0666	102.588	193.393	226.661	207.489
ENSG00000127804.13	METTL16	373.23	230.024	468.7	1.02443	4.94787e-20	2.75682e-19	231.2	228.849	486.884	471.751	447.467
ENSG00000176624.12	MEX3C	716.403	298.458	995.032	1.74226	2.22774e-80	4.38612e-79	282.577	314.339	995.148	966.536	1023.41
ENSG00000118855.21	MFSD1	1104.11	620.507	1426.51	1.20254	4.7552e-64	7.39777e-63	603.13	637.884	1402.34	1470.53	1406.64
ENSG00000138111.14	MFSD13A	29.3074	12.1607	40.7386	1.7497	0.000176995	0.000396721	11.1691	13.1523	34.9857	48.8336	38.3965
ENSG00000168389.18	MFSD2A	521.158	4.66595	865.486	7.48564	6.88914e-48	7.9307e-47	6.70144	2.63045	858.121	863.34	874.997
ENSG00000151690.15	MFSD6	430.841	264.064	542.026	1.0305	1.80386e-21	1.05754e-20	284.811	243.317	551.024	557.44	517.614
ENSG00000164073.11	MFSD8	197.985	117.029	251.956	1.10232	1.09559e-12	4.478e-12	126.21	107.848	239.069	256.146	260.653
ENSG00000174197.16	MGA	512.539	285.097	664.167	1.21339	6.37773e-29	4.66366e-28	307.149	263.045	719.15	641.286	632.065
ENSG00000008394.13	MGST1	519.518	256.345	694.967	1.435	4.68801e-45	5.08333e-44	268.058	244.632	676.39	726.975	681.537
ENSG00000150527.17	MIA2	538.669	253.986	728.459	1.51972	7.4944e-44	7.91586e-43	250.187	257.784	705.544	796.079	683.753
ENSG00000154305.18	MIA3	2282.33	1043.27	3108.36	1.57413	3.40417e-178	1.623e-176	1063.3	1023.25	3070.96	3111.53	3142.6
ENSG00000197530.12	MIB2	692.49	411.86	879.576	1.10202	8.48638e-27	5.81585e-26	360.761	462.959	875.614	839.384	923.73
ENSG00000100139.14	MICALL1	1269.8	719.781	1636.48	1.18523	1.61391e-58	2.26518e-57	729.34	710.222	1655.99	1539.64	1713.81
ENSG00000180488.15	MIGA1	658.85	315.796	887.552	1.48631	3.90856e-60	5.64955e-59	331.721	299.871	908.656	879.004	874.997
ENSG00000169330.9	MINAR1	78.7096	28.1678	112.404	2.01092	1.06129e-12	4.34242e-12	23.455	32.8806	116.619	106.881	113.713
ENSG00000247516.8	MIR4458HG	83.777	48.6426	107.2	1.14246	4.61564e-06	1.21487e-05	44.6763	52.609	103.985	121.623	95.9912
ENSG00000129534.14	MIS18BP1	300.128	170.996	386.216	1.17376	1.24549e-20	7.09519e-20	177.588	164.403	389.702	369.476	399.471
ENSG00000110917.8	MLEC	3482.06	1821.69	4588.97	1.3329	1.73376e-154	7.10702e-153	1828.38	1815.01	4663.78	4443.85	4659.26
ENSG00000076242.16	MLH1	561.413	340.389	708.762	1.05776	6.4137e-28	4.54206e-27	336.189	344.589	756.079	675.377	694.828
ENSG00000196549.13	MME	13.6496	1.21607	21.9386	4.18539	0.00025241	0.000555237	1.11691	1.31523	17.4928	23.9561	24.367
ENSG00000196611.6	MMP1	875.959	327.091	1241.87	1.91772	4.31726e-84	8.97932e-83	367.462	286.719	1172.99	1275.2	1277.42
ENSG00000102996.5	MMP15	37.9391	5.78285	59.3766	3.30998	1.12133e-09	3.85682e-09	8.93525	2.63045	53.4503	62.6544	62.0251
ENSG00000156103.16	MMP16	128.879	67.7031	169.663	1.32894	1.76951e-11	6.76334e-11	67.0144	68.3917	168.126	158.479	182.383
ENSG00000146085.8	MMUT	860.937	371.161	1187.45	1.68395	4.41e-80	8.64975e-79	345.124	397.198	1132.18	1194.12	1236.07
ENSG00000070444.15	MNT	590.26	215.405	840.162	1.96865	4.69029e-83	9.61323e-82	203.277	227.534	847.431	824.642	848.414
ENSG00000075643.6	MOCOS	47.8361	19.1596	66.9537	1.79782	3.10158e-07	8.98298e-07	21.2212	17.0979	65.1122	66.3399	69.409
ENSG00000115275.14	MOGS	952.559	447.377	1289.35	1.53226	8.66323e-82	1.7456e-80	419.957	474.796	1274.06	1271.52	1322.46
ENSG00000061987.16	MON2	1095.35	577.386	1440.66	1.32037	3.36429e-60	4.86738e-59	562.921	591.851	1526.74	1344.3	1450.94
ENSG00000116151.14	MORN1	78.108	29.4466	110.549	1.90391	3.94825e-12	1.56146e-11	31.2734	27.6197	108.844	110.567	112.236
ENSG00000171160.18	MORN4	188.934	102.609	246.484	1.26638	6.4031e-15	2.89851e-14	96.054	109.164	257.533	251.539	230.379
ENSG00000101928.13	MOSPD1	684.545	271.272	960.061	1.8243	2.23586e-80	4.39652e-79	270.291	272.252	910.599	1001.55	968.034
ENSG00000060762.19	MPC1	566.23	184.993	820.388	2.14142	1.76238e-83	3.64108e-82	197.692	172.295	846.459	835.699	779.005
ENSG00000130830.15	MPP1	452.298	254.696	584.032	1.19353	1.0241e-24	6.60636e-24	279.227	230.164	536.447	596.138	619.512
ENSG00000156968.9	MPV17L	51.5353	1.31523	85.0154	6.13615	4.51033e-09	1.49396e-08	0	2.63045	78.7178	84.7677	91.5608
ENSG00000158887.19	MPZ	27.6436	9.62937	39.6531	2.04245	3.50713e-05	8.4805e-05	10.0522	9.20658	35.9575	38.6983	44.3036
ENSG00000179832.17	MROH1	405.357	192.462	547.287	1.50813	1.17003e-36	1.05528e-35	187.64	197.284	591.841	516.899	533.12
ENSG00000112651.12	MRPL2	293.886	154.232	386.989	1.32317	5.99215e-22	3.54925e-21	166.419	142.044	352.772	410.939	397.256
ENSG00000215349.2	MRPL3P1	39.6911	22.7086	51.0128	1.16386	0.0022685	0.00438395	25.6889	19.7284	38.873	58.0474	56.1179
ENSG00000162910.19	MRPL55	305.454	161.465	401.447	1.31325	5.44157e-25	3.53235e-24	166.419	156.512	381.927	408.175	414.239
ENSG00000125459.17	MSTO1	878.205	218.099	1318.28	2.59955	4.18018e-163	1.80927e-161	209.978	226.219	1287.67	1331.41	1335.75
ENSG00000203761.5	MSTO2P	89.7759	24.3475	133.395	2.44091	0.000137595	0.000312433	36.8579	11.837	183.675	119.78	96.7296
ENSG00000205362.11	MT1A	6.65035	1.11691	10.3393	3.13347	0.0167213	0.0281933	2.23381	0	7.77459	9.21388	14.0295
ENSG00000198417.7	MT1F	35.1831	13.0792	49.919	1.92363	2.2882e-05	5.63235e-05	15.6367	10.5218	35.9575	56.2047	57.5947
ENSG00000125144.14	MT1G	9.82344	0	16.3724	6.19954	7.94205e-05	0.000184667	0	0	15.5492	16.585	16.9831
ENSG00000260549.2	MT1L	48.2478	25.1773	63.6281	1.35324	0.000139669	0.000316538	20.1043	30.2502	50.5349	74.6324	65.717
ENSG00000187193.9	MT1X	159.305	49.2638	232.666	2.23545	5.34345e-24	3.37258e-23	52.4946	46.0329	197.28	268.124	232.594
ENSG00000125148.7	MT2A	3882.75	897.144	5873.16	2.70905	0	0	931.5	862.788	5497.61	6244.24	5877.61
ENSG00000163738.18	MTHFD2L	44.9531	25.4382	57.9629	1.19281	0.00038069	0.000818821	24.5719	26.3045	53.4503	59.8902	60.5483
ENSG00000177000.13	MTHFR	521.125	256.084	697.82	1.44571	2.90663e-38	2.70826e-37	263.59	248.578	722.065	629.308	742.086
ENSG00000135297.17	MTO1	368.859	193.443	485.803	1.32627	4.18727e-31	3.24571e-30	198.809	188.077	480.081	492.942	484.386
ENSG00000198793.13	MTOR	1324.91	522.382	1859.93	1.82775	3.74167e-125	1.20285e-123	552.869	491.894	1945.59	1794.86	1839.34
ENSG00000107951.15	MTPAP	335.37	125.74	475.123	1.91455	5.57031e-47	6.28638e-46	131.795	119.685	483.968	453.323	488.078
ENSG00000116984.15	MTR	825.782	381.151	1122.2	1.56139	1.13123e-75	2.09169e-74	358.527	403.774	1153.56	1115.8	1097.25
ENSG00000176945.17	MUC20	50.4266	24.5196	67.6978	1.46864	8.56163e-05	0.000198448	20.1043	28.935	87.4642	65.4185	50.2108
ENSG00000242086.8	MUC20-OT1	507.685	313.124	637.392	1.0301	1.92412e-20	1.08732e-19	280.344	345.904	688.052	605.352	618.774
ENSG00000167508.12	MVD	427.597	232.133	557.906	1.26745	7.72383e-32	6.11552e-31	222.264	242.001	580.179	542.697	550.842
ENSG00000059728.11	MXD1	291.852	132.128	398.334	1.60533	9.84873e-27	6.73163e-26	111.691	152.566	368.321	396.197	430.484
ENSG00000132382.15	MYBBP1A	1013.41	373.223	1440.2	1.94875	1.17633e-129	3.91983e-128	366.345	380.1	1451.91	1468.69	1399.99
ENSG00000005810.18	MYCBP2	722.185	422.189	922.181	1.12754	4.17595e-34	3.54361e-33	422.191	422.187	972.796	844.913	948.836
ENSG00000104177.18	MYEF2	432.648	162.259	612.907	1.91955	5.70194e-58	7.93102e-57	157.484	167.034	643.348	579.553	615.82
ENSG00000257605.2	MYG1-AS1	48.9048	30.4016	61.2403	1.01517	0.00133043	0.00266035	27.9227	32.8806	58.3095	66.3399	59.0715
ENSG00000144821.10	MYH15	189.646	35.6626	292.302	3.05523	1.07387e-42	1.10635e-41	27.9227	43.4024	305.153	287.473	284.282
ENSG00000085274.16	MYNN	345.142	199.858	441.998	1.1499	4.66252e-21	2.69272e-20	193.225	206.49	437.321	414.624	474.049
ENSG00000172399.6	MYOZ2	455.262	243.526	596.418	1.29107	7.3234e-31	5.63997e-30	256.889	230.164	555.883	596.138	637.234
ENSG00000162601.11	MYSM1	421.837	254.257	533.556	1.07148	7.63668e-19	4.07755e-18	232.317	276.197	559.771	560.204	480.694
ENSG00000099326.9	MZF1	266.828	157.781	339.526	1.09757	1.29642e-15	6.03061e-15	170.887	144.675	363.462	331.7	323.416
ENSG00000204899.6	MZT1	245.348	124.66	325.807	1.38614	4.82483e-22	2.8633e-21	121.743	127.577	323.617	343.678	310.125
ENSG00000078177.14	N4BP2	144.986	64.1175	198.898	1.62397	2.89274e-17	1.44684e-16	70.3651	57.8699	203.111	200.863	192.721
ENSG00000135040.16	NAA35	413.326	224.998	538.877	1.26109	4.32259e-31	3.34893e-30	221.148	228.849	524.785	560.204	531.643
ENSG00000243477.6	NAA80	110.75	54.9578	147.945	1.44668	4.63877e-10	1.63805e-09	40.2086	69.7069	149.661	150.186	143.987
ENSG00000139579.13	NABP2	512.365	314.888	644.017	1.03687	4.29732e-23	2.64444e-22	304.916	324.861	592.813	649.578	689.66
ENSG00000152620.13	NADK2	768.741	460.769	974.055	1.07873	3.33001e-42	3.38499e-41	469.101	452.437	963.078	985.885	973.203
ENSG00000124357.13	NAGK	885.916	497.507	1144.86	1.20692	2.84207e-37	2.60271e-36	447.88	547.134	1099.13	1226.37	1109.07
ENSG00000105835.13	NAMPT	1038.04	357.503	1491.74	2.05723	8.88275e-145	3.34886e-143	373.047	341.959	1484.95	1508.31	1481.96
ENSG00000188613.7	NANOS1	72.8345	20.2765	107.873	2.39826	1.70202e-14	7.55669e-14	23.455	17.0979	106.901	105.96	110.759
ENSG00000170191.5	NANP	184.317	103.715	238.051	1.18645	1.9899e-12	8.01285e-12	120.626	86.8049	235.181	247.853	231.117
ENSG00000105402.8	NAPA	1544.83	814.149	2031.96	1.32121	1.29611e-99	3.19288e-98	799.705	828.592	1986.41	2050.09	2059.38
ENSG00000185818.8	NAT8L	14.9204	4.00833	22.1951	2.41652	0.00140464	0.00279585	6.70144	1.31523	25.2674	18.4278	22.8902
ENSG00000109065.12	NAT9	510.389	228.422	698.368	1.61488	7.83811e-47	8.82642e-46	212.212	244.632	735.671	714.076	645.356
ENSG00000166833.22	NAV2	514.678	275.541	674.103	1.28856	4.71057e-40	4.58194e-39	281.461	269.621	685.136	668.928	668.246
ENSG00000160796.18	NBEAL2	101.432	61.6592	127.947	1.05997	3.37662e-06	9.00219e-06	53.6115	69.7069	144.802	114.252	124.789
ENSG00000198496.12	NBR2	193.816	77.5046	271.357	1.82447	2.12929e-22	1.2808e-21	60.313	94.6962	287.66	248.775	277.636
ENSG00000020129.16	NCDN	1253.89	654.672	1653.37	1.33576	2.43714e-85	5.14488e-84	670.144	639.199	1642.38	1621.64	1696.09
ENSG00000144959.11	NCEH1	385.572	234.085	486.563	1.04704	5.55752e-18	2.85997e-17	266.941	201.229	474.25	500.314	485.125
ENSG00000239213.6	NCK1-DT	16.4044	6.63878	22.9148	1.78895	0.00845652	0.0149548	6.70144	6.57613	13.6055	32.2486	22.8902
ENSG00000188211.9	NCR3LG1	236.647	22.051	379.712	4.08985	2.23333e-53	2.88619e-52	25.6889	18.4132	404.279	335.385	399.471
ENSG00000058804.12	NDC1	314.608	168.699	411.88	1.28895	8.67571e-26	5.78443e-25	166.419	170.979	416.913	404.489	414.239
ENSG00000164182.12	NDUFAF2	236.568	148.063	295.572	1.00134	1.26838e-12	5.16792e-12	139.613	156.512	280.857	314.193	291.666
ENSG00000023228.14	NDUFS1	1336.36	800.328	1693.72	1.08013	5.34619e-59	7.57214e-58	822.043	778.613	1638.5	1748.79	1693.88
ENSG00000160194.18	NDUFV3	578.293	330.848	743.257	1.16644	2.79696e-32	2.24346e-31	347.358	314.339	694.854	753.695	781.221
ENSG00000245532.9	NEAT1	7298.29	3855.28	9593.62	1.31535	2.18109e-26	1.4758e-25	3625.48	4085.09	10457.8	9743.68	8579.4
ENSG00000103154.10	NECAB2	5.25066	0	8.7511	5.29991	0.0021967	0.00425527	0	0	4.85912	11.0567	10.3375
ENSG00000089818.18	NECAP1	468.701	267.524	602.818	1.17164	2.17615e-31	1.697e-30	268.058	266.991	618.08	587.845	602.529
ENSG00000069869.17	NEDD4	445.272	249.012	576.111	1.20537	1.68259e-29	1.24985e-28	269.175	228.849	569.489	566.653	592.192
ENSG00000114670.14	NEK11	178.371	25.7357	280.127	3.4621	1.28781e-42	1.32325e-41	21.2212	30.2502	269.195	295.765	275.421
ENSG00000160602.14	NEK8	65.7555	38.554	83.8898	1.12975	6.63105e-05	0.000155679	32.3903	44.7177	81.6332	93.9816	76.0545
ENSG00000204356.14	NELFE	630.124	348.317	817.996	1.23579	1.08236e-33	9.05569e-33	328.371	368.263	749.276	879.925	824.786
ENSG00000204386.12	NEU1	981.036	342.722	1406.58	2.03672	9.55814e-130	3.19878e-128	339.54	345.904	1416.92	1449.34	1353.48
ENSG00000215041.10	NEURL4	671.585	290.295	925.779	1.67006	7.90343e-73	1.40119e-71	300.448	280.143	954.331	899.274	923.73
ENSG00000077150.20	NFKB2	384.137	202.749	505.062	1.3182	5.50101e-32	4.37119e-31	197.692	207.806	506.32	510.449	498.416
ENSG00000104825.17	NFKBIB	207.397	127.128	260.909	1.04554	3.39959e-11	1.27887e-10	116.158	138.099	234.21	274.574	273.944
ENSG00000167604.15	NFKBID	21.2398	11.9623	27.4247	1.18822	0.0187954	0.0313864	13.4029	10.5218	29.1547	25.7989	27.3206
ENSG00000001167.14	NFYA	257.472	153.089	327.061	1.10018	2.89426e-15	1.32958e-14	149.666	156.512	312.927	312.35	355.906
ENSG00000188811.14	NHLRC3	216.276	87.4837	302.137	1.77864	5.16584e-28	3.67346e-27	96.054	78.9135	315.843	296.687	293.881
ENSG00000135540.11	NHSL1	188.192	97.1861	248.863	1.36321	1.84096e-16	8.92266e-16	90.4694	103.903	255.59	230.347	260.653
ENSG00000204131.9	NHSL2	92.2559	48.1468	121.662	1.33287	1.70532e-08	5.43478e-08	50.2608	46.0329	133.14	111.488	120.358
ENSG00000135842.17	NIBAN1	4004.86	1669.52	5561.75	1.73887	6.57258e-164	2.90148e-162	1542.45	1796.6	5486.92	5497.92	5700.4
ENSG00000073536.18	NLE1	170.843	80.8553	230.835	1.52519	1.35747e-16	6.61862e-16	67.0144	94.6962	247.815	216.526	228.164
ENSG00000123213.23	NLN	379.883	204.497	496.807	1.28834	4.16989e-27	2.87806e-26	185.407	223.588	504.377	469.908	516.137
ENSG00000167984.18	NLRC3	25.4807	10.287	35.6099	1.79155	0.000273566	0.000598631	10.0522	10.5218	36.9293	35.9341	33.9661
ENSG00000091592.16	NLRP1	1102.97	642.621	1409.87	1.13255	9.42882e-51	1.15768e-49	635.52	649.721	1486.89	1403.27	1339.45
ENSG00000143156.14	NME7	334.651	194.983	427.763	1.12958	1.40287e-18	7.39369e-18	211.095	178.871	389.702	454.244	439.344
ENSG00000171658.8	NMRAL2P	94.1978	4.96342	153.687	4.98766	1.33928e-20	7.61546e-20	3.35072	6.57613	158.407	155.715	146.94
ENSG00000106733.21	NMRK1	336.179	164.456	450.66	1.45176	2.805e-32	2.2485e-31	169.77	159.142	438.293	466.222	447.467
ENSG00000184967.7	NOC4L	163.541	94.1955	209.772	1.1603	1.87613e-11	7.15672e-11	87.1187	101.272	199.224	224.819	205.273
ENSG00000151014.6	NOCT	171.689	85.4483	229.184	1.41797	2.04564e-16	9.88373e-16	89.3525	81.544	244.9	221.133	221.518
ENSG00000167207.14	NOD2	6.22745	0.558453	10.0068	4.04936	0.0132327	0.0227066	1.11691	0	13.6055	8.29249	8.12233
ENSG00000165271.17	NOL6	1089.59	569.474	1436.33	1.3312	1.40198e-57	1.93962e-56	607.597	531.351	1358.61	1523.05	1427.31
ENSG00000166197.17	NOLC1	1513.9	679.698	2070.03	1.60885	1.09136e-119	3.32231e-118	662.326	697.069	1977.66	2137.62	2094.82
ENSG00000055044.11	NOP58	822.179	418.739	1091.14	1.38284	1.06465e-65	1.69025e-64	416.606	420.872	1058.32	1107.51	1107.59
ENSG00000163072.16	NOSTRIN	12.8321	4.66595	18.2762	1.93651	0.0102511	0.0178895	6.70144	2.63045	15.5492	23.0347	16.2447
ENSG00000204301.6	NOTCH4	13.096	5.7202	18.0132	1.69244	0.0262182	0.0426644	2.23381	9.20658	14.5774	23.9561	15.5063
ENSG00000141458.13	NPC1	1371.05	631.504	1864.08	1.56007	1.64192e-123	5.21342e-122	642.221	620.786	1883.4	1858.44	1850.41
ENSG00000183793.14	NPIPA5	78.8418	45.9757	100.752	1.12268	8.54236e-06	2.19363e-05	52.4946	39.4568	93.2951	107.802	101.16
ENSG00000226232.8	NPIPB14P	41.9535	16.5291	58.9031	1.80926	3.42373e-06	9.11839e-06	21.2212	11.837	58.3095	64.4971	53.9027
ENSG00000196436.8	NPIPB15	94.1488	44.1385	127.489	1.52994	1.02453e-10	3.73883e-10	43.5594	44.7177	136.055	121.623	124.789
ENSG00000114388.14	NPRL2	675.805	133.757	1037.17	2.94584	5.90514e-140	2.12791e-138	145.198	122.316	1063.18	1041.17	1007.17
ENSG00000221890.6	NPTXR	114.878	34.2117	168.656	2.29005	1.48663e-18	7.82451e-18	36.8579	31.5654	189.506	176.906	139.556
ENSG00000153234.15	NR4A2	20.8355	11.1064	27.3215	1.26794	0.0229202	0.0376559	15.6367	6.57613	34.0138	25.7989	22.1518
ENSG00000119508.18	NR4A3	52.1995	15.2504	76.8323	2.34453	1.88024e-10	6.77229e-10	13.4029	17.0979	74.8305	77.3966	78.2697
ENSG00000091129.21	NRCAM	30.779	11.2421	43.8036	1.99584	3.39226e-05	8.21555e-05	6.70144	15.7827	37.9011	46.9908	46.5188
ENSG00000157168.20	NRG1	12.2527	4.66595	17.3106	1.85941	0.013164	0.0225937	6.70144	2.63045	16.521	18.4278	16.9831
ENSG00000035681.9	NSMAF	847.116	437.34	1120.3	1.35745	3.79261e-63	5.82423e-62	436.711	437.97	1148.7	1074.34	1137.86
ENSG00000117481.10	NSUN4	327.582	184.065	423.261	1.19052	7.2982e-19	3.90085e-18	215.563	152.566	424.687	421.996	423.1
ENSG00000223705.9	NSUN5P1	480.181	286.532	609.279	1.09053	9.61235e-21	5.50419e-20	261.356	311.708	655.981	621.015	550.842
ENSG00000168268.11	NT5DC2	1522.04	720.694	2056.27	1.51666	1.75309e-95	4.19199e-94	674.612	766.776	2082.62	1962.56	2123.62
ENSG00000205309.14	NT5M	36.2267	6.63878	55.952	3.08078	9.23067e-09	2.99475e-08	6.70144	6.57613	50.5349	47.9122	69.409
ENSG00000095906.17	NUBP2	416.649	248.824	528.532	1.08728	2.06792e-25	1.36177e-24	249.07	248.578	526.729	524.27	534.597
ENSG00000070081.17	NUCB2	1830.6	1120.02	2304.32	1.03932	1.5435e-43	1.62036e-42	1183.92	1056.13	2136.07	2421.41	2355.48
ENSG00000166321.14	NUDT13	40.6339	24.1857	51.5995	1.07682	0.00347022	0.00652403	31.2734	17.0979	51.5067	47.9122	55.3795
ENSG00000183828.15	NUDT14	33.9943	16.1063	45.9197	1.53317	0.000255528	0.000562017	11.1691	21.0436	46.6476	46.0694	45.042
ENSG00000167005.14	NUDT21	1531.82	732.599	2064.63	1.49374	2.88313e-126	9.32652e-125	740.509	724.689	2071.93	2075.89	2046.09
ENSG00000177144.7	NUDT4B	74.889	30.8974	104.217	1.77129	9.58347e-08	2.88902e-07	22.3381	39.4568	126.337	75.5538	110.759
ENSG00000167799.10	NUDT8	55.0403	11.1064	84.3296	2.89044	1.76042e-12	7.10542e-12	15.6367	6.57613	81.6332	78.318	93.0376
ENSG00000170502.13	NUDT9	371.451	224.043	469.724	1.06847	8.21278e-22	4.84973e-21	224.498	223.588	452.87	483.729	472.572
ENSG00000226328.7	NUP50-DT	70.6491	34.5091	94.7424	1.46309	3.11286e-07	9.01397e-07	33.5072	35.5111	97.1824	79.2393	107.805
ENSG00000139496.16	NUP58	933.93	408.306	1284.35	1.64799	5.08051e-82	1.02637e-80	437.827	378.785	1253.65	1347.07	1252.32
ENSG00000176046.9	NUPR1	2279.15	1264.24	2955.76	1.22791	9.05315e-71	1.55692e-69	1181.69	1346.79	2816.35	3088.49	2962.44
ENSG00000153989.8	NUS1	1390.57	786.539	1793.26	1.18899	2.08884e-74	3.81232e-73	777.367	795.711	1854.24	1764.46	1761.07
ENSG00000132661.4	NXT1	202.38	65.892	293.371	2.14526	5.99264e-34	5.06579e-33	72.5989	59.1851	288.632	301.294	290.189
ENSG00000124596.17	OARD1	188.253	111.941	239.128	1.09525	2.72588e-12	1.08663e-11	109.457	114.425	237.125	250.617	229.64
ENSG00000197822.12	OCLN	291.013	117.327	406.804	1.7894	1.43403e-38	1.3475e-37	122.86	111.794	414.969	400.804	404.64
ENSG00000230847.4	OCLNP1	11.1964	2.99059	16.667	2.47948	0.00569581	0.0103758	3.35072	2.63045	14.5774	11.0567	24.367
ENSG00000257135.7	ODC1-DT	37.9611	15.1147	53.192	1.78479	3.37941e-05	8.18826e-05	22.3381	7.89135	47.6194	54.3619	57.5947
ENSG00000136811.16	ODF2	717.891	304.627	993.4	1.70371	2.39561e-78	4.62843e-77	309.383	299.871	969.881	1035.64	974.68
ENSG00000247556.6	OIP5-AS1	1456.64	793.21	1898.92	1.25576	3.65092e-59	5.19476e-58	857.784	728.635	1963.08	1805	1928.68
ENSG00000152463.15	OLAH	65.0787	32.0405	87.1042	1.42571	1.41843e-06	3.91426e-06	39.0917	24.9893	82.6051	96.7457	81.9617
ENSG00000235823.3	OLMALINC	38.7498	19.5197	51.5698	1.37847	0.00049278	0.00104469	24.5719	14.4675	57.3376	55.2833	42.0884
ENSG00000173391.9	OLR1	142.1	88.277	177.982	1.01138	6.84328e-08	2.08528e-07	87.1187	89.4353	198.252	158.479	177.214
ENSG00000085840.13	ORC1	14.737	4.96342	21.2527	2.11578	0.00340555	0.00641101	3.35072	6.57613	24.2956	23.9561	15.5063
ENSG00000091651.9	ORC6	80.7111	38.4183	108.906	1.50235	1.33897e-08	4.29818e-08	41.3255	35.5111	95.2388	109.645	121.835
ENSG00000128699.14	ORMDL1	596.896	345.723	764.345	1.14703	1.23297e-30	9.43449e-30	320.552	370.894	804.67	772.123	716.242
ENSG00000110048.12	OSBP	1792.34	724.034	2504.54	1.79264	2.69656e-185	1.34784e-183	703.651	744.417	2494.67	2498.8	2520.14
ENSG00000170909.13	OSCAR	22.1317	5.2244	33.4033	2.63481	2.63586e-05	6.46245e-05	7.81835	2.63045	30.1266	36.8555	33.2277
ENSG00000132823.11	OSER1	564.239	287.514	748.723	1.38439	5.10407e-46	5.64911e-45	272.525	302.502	731.784	776.73	737.655
ENSG00000140961.14	OSGIN1	87.3013	43.9767	116.184	1.41099	7.4159e-09	2.42169e-08	37.9748	49.9786	118.563	117.016	112.974
ENSG00000164823.11	OSGIN2	296.99	161.267	387.472	1.26072	6.40014e-23	3.91977e-22	168.653	153.881	402.335	373.162	386.918
ENSG00000081087.15	OSTM1	1032.88	593.868	1325.56	1.15557	8.50281e-59	1.19883e-57	614.299	573.438	1340.15	1325.88	1310.65
ENSG00000089723.10	OTUB2	33.2376	16.6283	44.3105	1.40032	0.000766485	0.00158546	20.1043	13.1523	38.873	49.7549	44.3036
ENSG00000083720.13	OXCT1	561.818	252.832	767.809	1.60157	1.45987e-55	1.9619e-54	255.772	249.893	733.727	813.585	756.115
ENSG00000154814.14	OXNAD1	164.479	68.82	228.252	1.7257	8.86342e-20	4.89796e-19	69.2482	68.3917	234.21	246.011	204.535
ENSG00000108405.4	P2RX1	265.107	23.4654	426.202	4.17801	6.4531e-63	9.86103e-62	24.5719	22.3588	427.603	421.996	429.007
ENSG00000089041.17	P2RX7	11.5655	3.6482	16.8437	2.22155	0.00775852	0.0137849	3.35072	3.94568	10.6901	18.4278	21.4134
ENSG00000244165.2	P2RY11	88.4136	52.2543	112.52	1.10551	5.07159e-05	0.00012051	55.8453	48.6633	126.337	82.0035	129.219
ENSG00000185624.16	P4HB	26826.3	12433.3	36421.7	1.55059	0	0	12408.8	12457.8	35646.5	37612.9	36005.6
ENSG00000163138.19	PACRGL	175.592	101.852	224.751	1.14295	4.92909e-12	1.94144e-11	97.1709	106.533	241.012	218.369	214.873
ENSG00000006712.15	PAF1	771.845	479.85	966.508	1.01523	2.08373e-33	1.72199e-32	446.763	512.938	934.895	984.042	980.587
ENSG00000076641.4	PAG1	384.737	232.42	486.282	1.05998	7.71829e-21	4.4278e-20	241.252	223.588	512.151	487.414	459.281
ENSG00000280789.2	PAGR1	191.226	101.492	251.049	1.31511	8.0151e-16	3.77489e-15	93.8202	109.164	236.153	249.696	267.299
ENSG00000217930.8	PAM16	152.787	89.5922	194.916	1.12349	9.63752e-11	3.52284e-10	87.1187	92.0658	189.506	201.784	193.459
ENSG00000149090.12	PAMR1	192.175	90.5108	259.952	1.52242	6.99473e-21	4.01717e-20	91.5864	89.4353	253.646	258.91	267.299
ENSG00000120137.7	PANK3	1637.34	889.174	2136.11	1.26454	1.87691e-95	4.48116e-94	887.941	890.407	2180.77	2079.57	2147.99
ENSG00000073150.14	PANX2	48.6943	26.6543	63.3877	1.24547	0.000357975	0.000774155	25.6889	27.6197	79.6896	58.0474	52.426
ENSG00000116183.11	PAPPA2	882.499	216.893	1326.24	2.62329	7.69147e-113	2.18277e-111	186.523	247.262	1268.23	1259.54	1450.94
ENSG00000182378.15	PAR	169.489	40.7513	255.315	2.63747	7.30951e-35	6.30628e-34	44.6763	36.8263	270.167	243.246	252.531
ENSG00000102981.10	PARD6A	15.2729	5.42272	21.8397	2.00527	0.00531368	0.00973002	5.58453	5.2609	15.5492	32.2486	17.7214
ENSG00000169116.11	PARM1	75.8853	35.5269	102.791	1.53296	8.18002e-09	2.66336e-08	36.8579	34.1959	97.1824	100.431	110.759
ENSG00000041880.15	PARP3	568.235	290.718	753.246	1.36954	3.18099e-45	3.46377e-44	310.5	270.936	743.446	741.717	774.575
ENSG00000125618.18	PAX8	7.02896	0.558453	11.3426	4.23223	0.00803137	0.0142485	1.11691	0	12.6337	11.0567	10.3375
ENSG00000214106.9	PAXIP1-AS2	233.005	139.811	295.134	1.07883	5.37779e-14	2.3361e-13	136.263	143.36	315.843	276.416	293.142
ENSG00000163939.18	PBRM1	1152.85	699.306	1455.22	1.05633	5.59736e-57	7.66853e-56	708.119	690.493	1451.91	1461.32	1452.42
ENSG00000132570.15	PCBD2	123.958	44.6343	176.84	1.99997	5.59394e-19	3.00653e-18	37.9748	51.2938	181.731	164.928	183.86
ENSG00000113555.6	PCDH12	8.46252	2.43213	12.4828	2.36391	0.0151141	0.0256932	2.23381	2.63045	14.5774	11.0567	11.8143
ENSG00000120265.18	PCMT1	1138.14	665.742	1453.07	1.124	2.76628e-44	2.95406e-43	693.599	637.884	1367.36	1557.15	1434.7
ENSG00000205861.13	PCOTH	9.29946	2.79227	13.6376	2.21346	0.0252245	0.0411382	5.58453	0	17.4928	13.8208	9.59912
ENSG00000102109.9	PCSK1N	22.5916	10.287	30.7947	1.58419	0.00193843	0.00378526	10.0522	10.5218	32.0702	28.563	31.7509
ENSG00000115257.15	PCSK4	32.7979	15.908	44.0579	1.4818	0.00115897	0.00233739	13.4029	18.4132	52.4785	29.4844	50.2108
ENSG00000185813.11	PCYT2	430.946	269.137	538.818	1.00115	2.86247e-21	1.66431e-20	264.707	273.567	532.56	568.496	515.399
ENSG00000174840.9	PDE12	332.839	203.073	419.351	1.04674	2.16699e-17	1.09018e-16	208.862	197.284	417.884	389.747	450.42
ENSG00000113448.19	PDE4D	6.79407	1.31523	10.4466	3.08806	0.0195712	0.0325837	0	2.63045	6.80277	8.29249	16.2447
ENSG00000178104.19	PDE4DIP	1668.48	990.99	2120.14	1.09694	9.58787e-81	1.89737e-79	992.93	989.049	2125.38	2124.72	2110.33
ENSG00000073417.15	PDE8A	464.464	288.234	581.951	1.0177	4.25882e-22	2.53128e-21	279.227	297.241	583.095	545.462	617.297
ENSG00000145431.11	PDGFC	450.27	269.012	571.11	1.09255	3.16551e-24	2.01518e-23	251.304	286.719	539.362	575.867	598.099
ENSG00000175087.10	PDIK1L	63.5605	34.5718	82.8863	1.24743	1.22931e-05	3.10889e-05	40.2086	28.935	87.4642	82.9249	78.2697
ENSG00000172840.7	PDP2	215.951	129.686	273.461	1.07763	2.89665e-12	1.15264e-11	131.795	127.577	280.857	244.168	295.357
ENSG00000205918.9	PDPK2P	69.0314	28.7524	95.884	1.7114	5.70715e-07	1.6238e-06	39.0917	18.4132	121.478	85.6891	80.4849
ENSG00000179889.19	PDXDC1	2612.79	1242.07	3526.59	1.50425	4.36814e-176	2.05104e-174	1260.99	1223.16	3527.72	3586.04	3466.02
ENSG00000255185.6	PDXDC2P	27.4985	13.2776	36.9791	1.46846	0.00249271	0.004785	13.4029	13.1523	41.7884	43.3052	25.8438
ENSG00000160209.19	PDXK	1267	652.855	1676.43	1.36265	2.97602e-56	4.04149e-55	616.533	689.178	1815.37	1548.85	1665.08
ENSG00000186862.20	PDZD7	74.2549	30.8609	103.184	1.7468	5.49203e-10	1.92881e-09	30.1565	31.5654	102.042	93.0602	114.451
ENSG00000242265.6	PEG10	396.899	240.473	501.183	1.05834	3.79613e-22	2.26061e-21	246.836	234.11	477.166	520.584	505.8
ENSG00000141456.16	PELP1	539.449	324.084	683.025	1.07439	3.76853e-31	2.9226e-30	327.254	320.915	682.221	691.962	674.892
ENSG00000187642.9	PERM1	105.789	2.43213	174.694	6.17452	6.47615e-17	3.19579e-16	2.23381	2.63045	189.506	164.007	170.569
ENSG00000100029.18	PES1	1316.94	597.527	1796.55	1.58913	6.07756e-95	1.44214e-93	595.311	599.743	1676.4	1880.55	1832.69
ENSG00000123836.15	PFKFB2	190.319	114.957	240.56	1.05678	2.28035e-11	8.65816e-11	127.327	102.588	238.097	248.775	234.809
ENSG00000164708.6	PGAM2	5.45383	0	9.08971	5.34596	0.00190176	0.00371646	0	0	6.80277	13.8208	6.64554
ENSG00000247077.7	PGAM5	329.314	171.951	434.223	1.33636	2.35856e-28	1.69508e-27	174.237	169.664	425.659	433.974	443.036
ENSG00000013375.16	PGM3	2111.97	1304.45	2650.31	1.0213	1.0149e-72	1.79519e-71	1321.3	1287.61	2741.52	2621.35	2588.07
ENSG00000173889.16	PHC3	613.06	371.412	774.159	1.0594	6.95102e-27	4.76997e-26	371.93	370.894	829.938	707.626	784.912
ENSG00000112511.18	PHF1	686.323	379.601	890.804	1.23268	2.48114e-45	2.70742e-44	368.579	390.622	918.374	856.891	897.148
ENSG00000129292.21	PHF20L1	1111.6	662.761	1410.83	1.08964	5.44259e-54	7.13477e-53	667.91	657.613	1447.05	1358.13	1427.31
ENSG00000010318.21	PHF7	38.6711	16.7639	53.2759	1.68916	3.38567e-05	8.20087e-05	11.1691	22.3588	56.3658	56.2047	47.2572
ENSG00000067177.15	PHKA1	136.102	36.0227	202.822	2.50841	2.8107e-26	1.89603e-25	31.2734	40.772	187.562	200.863	220.041
ENSG00000156873.16	PHKG2	257.726	157.916	324.265	1.03519	6.14092e-14	2.65866e-13	161.951	153.881	309.04	352.892	310.864
ENSG00000176531.10	PHLDB3	61.0751	32.8703	79.8783	1.30376	2.75079e-05	6.73569e-05	22.3381	43.4024	76.7741	80.1607	82.7001
ENSG00000144362.12	PHOSPHO2	20.6373	10.1878	27.6036	1.43231	0.00668026	0.0120124	11.1691	9.20658	25.2674	29.4844	28.059
ENSG00000107537.14	PHYH	427.328	159.529	605.861	1.92626	2.36469e-61	3.5063e-60	158.601	160.457	594.756	609.959	612.867
ENSG00000155252.13	PI4K2A	894.317	478.838	1171.3	1.28754	2.48501e-61	3.67416e-60	502.608	455.068	1162.3	1162.79	1188.81
ENSG00000083535.16	PIBF1	276.714	169.023	348.508	1.04323	4.83593e-15	2.20002e-14	177.588	160.457	323.617	351.97	369.935
ENSG00000100151.16	PICK1	224.553	129.388	287.997	1.15043	8.41696e-16	3.95814e-15	135.146	123.631	290.575	288.394	285.02
ENSG00000165195.16	PIGA	138.924	65.4692	187.894	1.52399	4.48796e-15	2.04412e-14	62.5468	68.3917	199.224	176.906	187.552
ENSG00000213713.3	PIGCP1	47.3735	29.5457	59.2587	1.00371	0.00157183	0.00311174	30.1565	28.935	57.3376	59.8902	60.5483
ENSG00000100564.9	PIGH	151.169	76.0537	201.247	1.41215	9.53479e-12	3.69169e-11	69.2482	82.8592	164.238	227.583	211.919
ENSG00000108474.17	PIGL	159.882	55.0831	229.748	2.06226	1.03766e-25	6.90063e-25	53.6115	56.5547	220.604	244.168	224.472
ENSG00000011405.13	PIK3C2A	1402.38	867.598	1758.9	1.01696	2.13473e-55	2.84906e-54	901.344	833.853	1803.71	1723	1749.99
ENSG00000115020.17	PIKFYVE	1063.06	567.188	1393.64	1.29603	8.49009e-68	1.39802e-66	574.09	560.286	1445.1	1335.09	1400.73
ENSG00000121716.20	PILRB	152.554	92.8177	192.379	1.05688	1.6316e-08	5.20735e-08	80.4173	105.218	213.801	186.12	177.214
ENSG00000198355.5	PIM3	567.619	334.815	722.822	1.1178	1.13192e-28	8.20737e-28	302.682	366.948	707.488	704.862	756.115
ENSG00000165782.11	PIP4P1	470.2	205.254	646.83	1.66144	1.10651e-44	1.19066e-43	184.29	226.219	648.207	688.277	604.006
ENSG00000198961.10	PJA2	3022.3	1814.8	3827.3	1.07709	4.43506e-114	1.28211e-112	1794.87	1834.74	3826.07	3830.21	3825.62
ENSG00000166473.17	PKD1L2	8.50185	1.67536	13.0528	2.87685	0.00869865	0.0153602	3.35072	0	15.5492	11.0567	12.5527
ENSG00000244257.5	PKD1P1	64.2233	0	107.039	8.90719	5.35845e-07	1.52655e-06	0	0	41.7884	194.413	84.9153
ENSG00000107593.17	PKD2L1	22.6646	1.87368	36.5252	4.33344	2.69031e-06	7.24476e-06	1.11691	2.63045	29.1547	36.8555	43.5652
ENSG00000130943.7	PKDREJ	10.004	3.84652	14.1089	1.92629	0.0275469	0.0446411	1.11691	6.57613	12.6337	15.6636	14.0295
ENSG00000065243.20	PKN2	656.781	375.023	844.62	1.17026	3.21995e-41	3.2127e-40	383.099	366.948	856.177	818.192	859.49
ENSG00000144283.22	PKP4	839.716	514.025	1056.84	1.04357	8.59088e-41	8.48e-40	491.439	536.612	1036.94	1057.75	1075.84
ENSG00000182378.15	PLCXD1	169.489	40.7513	255.315	2.63747	7.30951e-35	6.30628e-34	44.6763	36.8263	270.167	243.246	252.531
ENSG00000179598.6	PLD6	31.6125	18.9613	40.0467	1.07262	0.0143041	0.02441	23.455	14.4675	30.1266	40.5411	49.4724
ENSG00000100558.9	PLEK2	8.14847	2.23381	12.0916	2.36394	0.0240767	0.0394031	4.46763	0	9.71824	14.7422	11.8143
ENSG00000115762.16	PLEKHB2	2081.61	1137.38	2711.09	1.25429	1.05073e-110	2.89185e-109	1129.19	1145.56	2658.91	2698.74	2775.62
ENSG00000225190.11	PLEKHM1	557.565	338.38	703.689	1.05685	2.86669e-29	2.11219e-28	344.007	332.752	695.826	679.063	736.178
ENSG00000187583.11	PLEKHN1	15.7214	7.75569	21.0319	1.42918	0.0203236	0.0337168	8.93525	6.57613	18.4647	23.9561	20.675
ENSG00000147872.10	PLIN2	2918.86	1775.5	3681.09	1.05275	8.40334e-53	1.07434e-51	1682.06	1868.94	3695.85	3894.71	3452.73
ENSG00000147535.17	PLPP5	599.1	194.56	868.794	2.15433	1.79242e-90	4.00196e-89	201.043	188.077	891.163	888.218	827.001
ENSG00000271826.5	PLS3-AS1	11.8045	4.30581	16.8037	1.98582	0.0100542	0.0175676	3.35072	5.2609	15.5492	15.6636	19.1982
ENSG00000198753.12	PLXNB3	152.981	23.9612	238.995	3.33843	1.49028e-33	1.24083e-32	18.9874	28.935	264.336	204.548	248.1
ENSG00000064933.18	PMS1	283.333	166.231	361.401	1.12003	1.12479e-17	5.71804e-17	172.004	160.457	337.223	370.398	376.581
ENSG00000163344.6	PMVK	349.457	202.994	447.099	1.14765	7.77558e-16	3.66543e-15	165.302	240.686	449.955	472.672	418.669
ENSG00000182013.18	PNMA8A	23.3973	12.62	30.5822	1.27227	0.00900388	0.0158612	13.4029	11.837	34.0138	26.7202	31.0125
ENSG00000115946.8	PNO1	362.192	184.075	480.936	1.3837	1.25474e-30	9.59638e-30	193.225	174.925	453.842	488.336	500.631
ENSG00000135241.17	PNPLA8	851.393	459.344	1112.76	1.27077	2.51593e-52	3.17462e-51	492.556	426.133	1130.23	1131.46	1076.58
ENSG00000148229.13	POLE3	859.768	332.2	1211.48	1.8639	5.70074e-96	1.37376e-94	339.54	324.861	1199.23	1278.89	1156.32
ENSG00000125630.16	POLR1B	517.541	189.31	736.362	1.96409	4.54152e-74	8.23051e-73	178.705	199.914	745.389	733.425	730.271
ENSG00000058600.16	POLR3E	504.059	213.683	697.643	1.70029	5.73524e-58	7.97018e-57	230.083	197.284	706.516	697.491	688.921
ENSG00000099821.14	POLRMT	463.918	270.254	593.027	1.1365	1.72691e-28	1.2469e-27	266.941	273.567	584.066	574.025	620.989
ENSG00000009830.12	POMT2	397.147	194.659	532.139	1.44825	2.60885e-36	2.33126e-35	199.926	189.392	557.827	507.685	530.905
ENSG00000128513.16	POT1	219.23	126.894	280.788	1.14636	4.77302e-15	2.17204e-14	126.21	127.577	268.223	295.765	278.374
ENSG00000130810.20	PPAN	315.25	191.815	397.54	1.05965	9.76513e-16	4.57823e-15	165.302	218.327	415.941	382.376	394.302
ENSG00000186951.16	PPARA	517.747	303.448	660.614	1.1251	1.29911e-28	9.40203e-28	300.448	306.447	656.953	621.937	702.951
ENSG00000132170.23	PPARG	82.5758	50.84	103.733	1.01801	2.43517e-05	5.9827e-05	56.9622	44.7177	105.929	107.802	97.468
ENSG00000128059.8	PPAT	188.591	87.3584	256.079	1.55771	9.96267e-20	5.4917e-19	82.6511	92.0658	232.266	270.888	265.083
ENSG00000177380.14	PPFIA3	99.0923	19.6189	152.075	2.94211	1.26772e-20	7.21648e-20	23.455	15.7827	135.084	140.972	180.168
ENSG00000145725.20	PPIP5K2	821.168	397.857	1103.38	1.46627	8.21531e-68	1.35566e-66	422.191	373.524	1131.2	1103.82	1075.1
ENSG00000111110.12	PPM1H	148.96	71.9097	200.327	1.47869	6.58487e-16	3.11265e-15	71.482	72.3374	200.196	199.941	200.843
ENSG00000163644.15	PPM1K	524.316	175.886	756.602	2.09407	9.21152e-74	1.66355e-72	196.576	155.197	768.713	776.73	724.364
ENSG00000143224.18	PPOX	156.597	89.5296	201.309	1.17519	3.99056e-10	1.4127e-09	80.4173	98.6419	182.703	228.504	192.721
ENSG00000204619.8	PPP1R11	1089.3	502.601	1480.44	1.55541	3.82385e-87	8.24068e-86	523.829	481.372	1436.36	1556.22	1448.73
ENSG00000087074.8	PPP1R15A	2161.32	1143.4	2839.93	1.31468	8.5389e-109	2.30908e-107	1105.74	1181.07	2742.49	2907.9	2869.4
ENSG00000235194.9	PPP1R3E	246.887	44.7335	381.655	3.10774	9.29864e-54	1.21384e-52	36.8579	52.609	386.786	404.489	353.691
ENSG00000049769.14	PPP1R3F	91.921	55.3806	116.281	1.07966	3.23432e-06	8.64365e-06	50.2608	60.5004	116.619	105.96	126.265
ENSG00000148840.11	PPRC1	724.034	383.311	951.182	1.31223	5.98874e-56	8.0762e-55	378.631	387.991	955.303	943.501	954.743
ENSG00000126432.14	PRDX5	2524.19	1509.03	3200.97	1.08715	2.21904e-63	3.4213e-62	1409.54	1608.52	3129.27	3320.68	3152.94
ENSG00000255874.2	PRECSIT	334.936	149.106	458.822	1.61775	2.67942e-37	2.45812e-36	157.484	140.729	465.504	441.345	469.618
ENSG00000101166.16	PRELID3B	795.875	453.572	1024.08	1.17462	1.4516e-45	1.59183e-44	461.282	445.861	972.796	1060.52	1038.92
ENSG00000111725.11	PRKAB1	320.561	194.534	404.579	1.05968	2.92413e-18	1.52352e-17	186.523	202.545	385.814	424.76	403.163
ENSG00000100462.16	PRMT5	899.214	551.306	1131.15	1.03377	3.85912e-43	4.02945e-42	575.207	527.405	1130.23	1137.91	1125.31
ENSG00000171867.18	PRNP	3517.06	1880.21	4608.29	1.2943	3.90841e-104	1.00432e-102	1850.71	1909.71	4326.56	4782.92	4715.38
ENSG00000184500.16	PROS1	460.301	245.463	603.526	1.29475	1.22661e-31	9.63321e-31	264.707	226.219	583.095	585.081	642.402
ENSG00000135406.14	PRPH	56.2255	29.3109	74.1686	1.31313	0.000275069	0.000601834	40.2086	18.4132	88.436	76.4752	57.5947
ENSG00000112619.8	PRPH2	29.6084	7.2964	44.4831	2.62122	1.0157e-06	2.8393e-06	6.70144	7.89135	37.9011	42.3838	53.1643
ENSG00000156858.12	PRR14	354.593	210.118	450.909	1.11045	7.33031e-20	4.0551e-19	188.757	231.48	430.518	449.637	472.572
ENSG00000183248.12	PRR36	5.04996	0	8.41659	5.24526	0.00233123	0.00449731	0	0	6.80277	7.3711	11.0759
ENSG00000164244.21	PRRC1	1314.75	644.259	1761.75	1.45027	2.55215e-101	6.38863e-100	646.689	641.83	1763.86	1806.84	1714.55
ENSG00000230082.1	PRRT3-AS1	11.6185	3.6482	16.9321	2.22676	0.00944596	0.016589	3.35072	3.94568	8.74642	22.1133	19.9366
ENSG00000013275.8	PSMC4	1313.06	553.937	1819.14	1.71265	4.9103e-104	1.25969e-102	575.207	532.666	1759.97	1942.29	1755.16
ENSG00000197170.10	PSMD12	939.016	579.735	1178.54	1.02121	4.27529e-43	4.46098e-42	603.13	556.34	1154.53	1195.96	1185.12
ENSG00000125650.4	PSPN	51.1495	30.005	65.2458	1.12342	0.000791074	0.00163001	32.3903	27.6197	58.3095	56.2047	81.2233
ENSG00000140043.11	PTGR2	127.699	66.414	168.555	1.32738	6.78136e-09	2.2201e-08	81.5342	51.2938	197.28	151.108	157.278
ENSG00000073756.13	PTGS2	149.232	90.2134	188.578	1.05818	1.59302e-09	5.43696e-09	94.9371	85.4896	196.308	187.042	182.383
ENSG00000087494.16	PTHLH	7.83083	1.97284	11.7362	2.65904	0.0211851	0.03504	0	3.94568	6.80277	12.8994	15.5063
ENSG00000158079.16	PTPDC1	227.022	96.7165	313.892	1.68561	3.58058e-26	2.41012e-25	110.574	82.8592	327.505	311.429	302.741
ENSG00000134242.16	PTPN22	15.9133	0.558453	26.1499	5.43401	0.000268799	0.000589031	1.11691	0	30.1266	23.9561	24.367
ENSG00000076201.15	PTPN23	873.782	537.11	1098.23	1.0289	9.26539e-39	8.74344e-38	557.336	516.884	1145.78	1060.52	1088.39
ENSG00000127329.16	PTPRB	74.0368	33.888	100.803	1.59022	1.5352e-08	4.9098e-08	25.6889	42.0872	106.901	95.8243	99.6831
ENSG00000152894.15	PTPRK	940.251	477.001	1249.08	1.38684	2.94624e-69	4.9407e-68	493.673	460.329	1274.06	1198.73	1274.47
ENSG00000153233.13	PTPRR	57.9294	7.75569	91.3785	3.54326	1.8531e-14	8.2063e-14	8.93525	6.57613	102.042	78.318	93.776
ENSG00000141378.15	PTRH2	366.939	134.451	521.932	1.95721	1.35113e-49	1.62042e-48	137.38	131.523	482.025	534.405	549.365
ENSG00000177192.14	PUS1	211.977	110.401	279.694	1.35261	6.44579e-17	3.18284e-16	97.1709	123.631	257.533	281.023	300.526
ENSG00000169972.12	PUSL1	151.647	75.0986	202.679	1.43708	3.1373e-15	1.43909e-14	72.5989	77.5983	197.28	198.098	212.657
ENSG00000011478.13	QPCTL	532.817	182.958	766.057	2.06401	3.69546e-72	6.46288e-71	190.991	174.925	772.6	714.076	811.495
ENSG00000103485.19	QPRT	511.74	284.424	663.284	1.22729	2.82492e-30	2.14464e-29	270.291	298.556	612.249	668.006	709.596
ENSG00000198218.11	QRICH1	937.633	545.001	1199.39	1.13721	1.53075e-52	1.94737e-51	557.336	532.666	1197.29	1172.93	1227.95
ENSG00000165661.17	QSOX2	497.885	270.082	649.754	1.26383	3.62938e-36	3.23203e-35	283.694	256.469	648.207	632.072	668.985
ENSG00000099246.17	RAB18	1760.98	1092.21	2206.83	1.01399	2.96173e-72	5.19728e-71	1104.62	1079.8	2222.56	2190.14	2207.8
ENSG00000167964.13	RAB26	18.4281	2.33297	29.1582	3.60391	1.862e-05	4.61775e-05	3.35072	1.31523	26.2393	29.4844	31.7509
ENSG00000041353.10	RAB27B	26.5761	1.11691	43.5489	5.17596	1.66224e-06	4.55784e-06	2.23381	0	44.7039	46.0694	39.8733
ENSG00000134594.5	RAB33A	173.403	55.4171	252.061	2.20713	1.30177e-27	9.12708e-27	42.4425	68.3917	244.9	243.246	268.037
ENSG00000100228.13	RAB36	95.1071	41.2836	130.989	1.68239	2.33775e-11	8.87394e-11	31.2734	51.2938	136.055	133.601	123.312
ENSG00000155961.5	RAB39B	35.9927	5.42272	56.3727	3.37942	2.66506e-09	8.97328e-09	5.58453	5.2609	46.6476	58.9688	63.5019
ENSG00000118873.16	RAB3GAP2	1383.08	737.949	1813.17	1.2939	1.10784e-80	2.18954e-79	761.73	714.167	1876.59	1807.76	1755.16
ENSG00000127328.22	RAB3IP	96.8196	45.2554	131.196	1.53254	5.86059e-11	2.17222e-10	45.7932	44.7177	130.224	140.051	123.312
ENSG00000172476.4	RAB40A	48.8157	6.44046	77.0659	3.54378	2.37808e-12	9.52155e-12	8.93525	3.94568	67.0559	86.6104	77.5313
ENSG00000144840.10	RABL3	356.274	208.224	454.975	1.11911	1.61692e-20	9.16731e-20	232.317	184.132	467.447	447.794	449.682
ENSG00000113522.14	RAD50	918.381	555.356	1160.4	1.06102	1.28636e-11	4.94717e-11	633.286	477.427	1138.01	1120.41	1222.78
ENSG00000157927.17	RADIL	25.4586	3.74736	39.9327	3.4501	5.8494e-07	1.66336e-06	2.23381	5.2609	41.7884	43.3052	34.7045
ENSG00000147231.14	RADX	14.0581	4.7651	20.2535	2.06812	0.00401629	0.00747717	5.58453	3.94568	23.3238	21.1919	16.2447
ENSG00000006451.8	RALA	1931	682.057	2763.62	2.01866	5.39427e-226	3.49725e-224	680.196	683.917	2721.11	2833.27	2736.49
ENSG00000136828.19	RALGPS1	25.4098	11.0438	34.9872	1.67893	0.000936214	0.00191204	8.93525	13.1523	39.8448	26.7202	38.3965
ENSG00000141084.11	RANBP10	289.17	167.744	370.121	1.13781	8.45228e-18	4.3181e-17	169.77	165.718	380.955	389.747	339.661
ENSG00000153201.16	RANBP2	2195.35	1341.69	2764.46	1.0425	2.46449e-83	5.07135e-82	1353.69	1329.69	2810.52	2700.59	2782.27
ENSG00000079337.16	RAPGEF3	29.6372	9.53021	43.0419	2.16001	7.54602e-06	1.94811e-05	11.1691	7.89135	43.7321	43.3052	42.0884
ENSG00000228903.7	RASA4CP	27.2549	7.59387	40.3622	2.46015	2.89991e-05	7.08517e-05	3.35072	11.837	34.0138	33.17	53.9027
ENSG00000105122.13	RASAL3	30.1273	0.657613	49.7737	6.36485	1.17687e-05	2.98017e-05	0	1.31523	41.7884	50.6763	56.8563
ENSG00000108551.5	RASD1	13.7806	3.08974	20.9078	2.78087	0.000752224	0.00155867	2.23381	3.94568	18.4647	25.7989	18.4598
ENSG00000171174.15	RBKS	23.2494	3.44988	36.4491	3.3401	4.46789e-06	1.17818e-05	5.58453	1.31523	35.9575	46.0694	27.3206
ENSG00000162775.17	RBM15	106.918	66.6853	133.739	1.00637	2.16689e-06	5.87713e-06	63.6637	69.7069	124.393	148.343	128.48
ENSG00000122965.11	RBM19	303.873	182.671	384.674	1.07738	7.93884e-18	4.06115e-17	172.004	193.338	404.279	373.162	376.581
ENSG00000106344.8	RBM28	407.529	234.863	522.64	1.15977	1.95058e-22	1.17513e-21	221.148	248.578	529.644	476.357	561.918
ENSG00000281691.1	RBM5-AS1	6.7885	0.657613	10.8758	4.16703	0.0103009	0.0179723	0	1.31523	6.80277	11.0567	14.7679
ENSG00000131381.12	RBSN	530.361	319.058	671.23	1.07359	7.81126e-31	6.0097e-30	317.202	320.915	671.531	668.006	674.153
ENSG00000089902.10	RCOR1	557.971	346.621	698.872	1.00762	5.39156e-27	3.71134e-26	369.696	323.545	698.742	688.277	709.596
ENSG00000072042.13	RDH11	1365.36	745.36	1778.69	1.25039	1.47662e-66	2.36855e-65	804.173	686.548	1758.03	1813.29	1764.76
ENSG00000160957.14	RECQL4	215.31	76.2155	308.04	2.01668	6.87892e-33	5.60699e-32	74.8328	77.5983	322.646	288.394	313.079
ENSG00000162924.15	REL	64.9315	35.9862	84.2284	1.21862	1.14226e-05	2.89442e-05	39.0917	32.8806	90.3797	81.0821	81.2233
ENSG00000173039.19	RELA	1251.54	745.282	1589.05	1.09194	1.74917e-60	2.53777e-59	760.613	729.95	1558.81	1576.49	1631.85
ENSG00000102032.13	RENBP	57.9128	4.86426	93.2786	4.27256	3.1893e-14	1.39876e-13	4.46763	5.2609	76.7741	104.117	98.9448
ENSG00000157916.20	RER1	2253.36	1389.2	2829.46	1.02778	1.76658e-84	3.68414e-83	1359.28	1419.13	2812.46	2817.6	2858.32
ENSG00000154153.14	RETREG1	99.9034	20.3756	152.922	2.89747	1.03451e-22	6.29603e-22	22.3381	18.4132	149.661	162.164	146.94
ENSG00000205517.13	RGL3	40.7411	21.0333	53.8796	1.34819	0.000219314	0.000486093	22.3381	19.7284	59.2813	54.3619	47.9956
ENSG00000185304.15	RGPD2	7.64863	1.67536	11.6308	2.71138	0.0204712	0.0339325	3.35072	0	11.6619	16.585	6.64554
ENSG00000015568.13	RGPD5	570.95	341.156	724.146	1.0858	0.000424293	0.000908069	312.734	369.578	759.967	891.903	520.568
ENSG00000103269.14	RHBDL1	47.0889	10.287	71.6236	2.801	4.98934e-11	1.85751e-10	10.0522	10.5218	75.8023	68.1827	70.8858
ENSG00000188672.19	RHCE	27.7655	2.89143	44.3482	3.88223	1.07964e-07	3.24394e-07	4.46763	1.31523	44.7039	46.9908	41.35
ENSG00000139725.8	RHOF	60.5415	11.503	93.2338	3.01865	2.30792e-14	1.01797e-13	11.1691	11.837	103.013	90.296	86.3921
ENSG00000275793.1	RIMBP3	28.9523	6.53962	43.8941	2.73351	7.79966e-07	2.19658e-06	7.81835	5.2609	35.9575	46.9908	48.734
ENSG00000183246.7	RIMBP3C	22.2245	5.2609	33.5336	2.70131	0.0294695	0.047521	0	10.5218	34.0138	30.4058	36.1813
ENSG00000170854.18	RIOX2	453.448	266.444	578.118	1.1193	4.61783e-28	3.28981e-27	258.005	274.882	593.785	567.575	572.993
ENSG00000131263.13	RLIM	1209.53	592.073	1621.17	1.44703	1.3735e-66	2.20543e-65	656.741	527.405	1638.5	1649.28	1575.73
ENSG00000115963.14	RND3	5979.59	2689.92	8172.69	1.6027	8.72295e-296	7.85826e-294	2715.2	2664.65	8126.39	8324.74	8066.95
ENSG00000125352.6	RNF113A	188.793	111.309	240.449	1.10244	6.01654e-12	2.35718e-11	123.977	98.6419	235.181	250.617	235.548
ENSG00000082996.20	RNF13	776.419	453.833	991.476	1.1269	1.45239e-42	1.4894e-41	465.75	441.916	949.472	1005.23	1019.72
ENSG00000245149.4	RNF139-AS1	16.2182	6.53962	22.6706	1.78061	0.00503025	0.0092438	7.81835	5.2609	24.2956	19.3491	24.367
ENSG00000145860.12	RNF145	1812.54	1078.65	2301.8	1.0915	1.2683e-67	2.0796e-66	1131.43	1025.88	2313.91	2235.29	2356.21
ENSG00000158286.13	RNF207	153.646	74.8011	206.21	1.45751	2.26825e-14	1.00133e-13	75.9497	73.6526	228.379	206.391	183.86
ENSG00000127870.17	RNF6	988.033	542.157	1285.28	1.24855	9.75457e-64	1.51298e-62	522.712	561.601	1263.37	1282.57	1309.91
ENSG00000101654.18	RNMT	827.483	389.58	1119.42	1.51865	7.6055e-72	1.32413e-70	404.32	374.839	1138.98	1147.13	1072.15
ENSG00000154134.15	ROBO3	79.5668	31.6804	111.491	1.80107	6.86628e-11	2.53437e-10	35.741	27.6197	117.591	117.938	98.9448
ENSG00000154133.15	ROBO4	28.6416	1.21607	46.9253	5.27978	9.03902e-07	2.53364e-06	1.11691	1.31523	40.8166	53.4405	46.5188
ENSG00000117748.10	RPA2	375.64	208.694	486.937	1.22042	1.3359e-27	9.35797e-27	212.212	205.175	499.518	479.122	482.171
ENSG00000269609.6	RPARP-AS1	27.3129	15.1512	35.4206	1.22865	0.00541151	0.0098963	14.5198	15.7827	33.042	37.7769	35.4429
ENSG00000197498.13	RPF2	419.297	216.288	554.636	1.35984	7.49023e-33	6.09564e-32	215.563	217.012	515.067	586.924	561.918
ENSG00000103494.16	RPGRIP1L	494.161	142.765	728.425	2.34891	5.27939e-86	1.12368e-84	147.432	138.099	740.53	697.491	747.254
ENSG00000241081.1	RPL22P2	13.8852	4.20665	20.3375	2.26157	0.00312609	0.00591871	4.46763	3.94568	28.1829	16.585	16.2447
ENSG00000239257.1	RPL23AP1	8.93601	0.558453	14.521	4.58404	0.00389574	0.00726757	1.11691	0	22.352	10.1353	11.0759
ENSG00000243742.5	RPLP0P2	156.35	12.62	252.171	4.31507	1.62004e-36	1.45353e-35	13.4029	11.837	230.322	269.967	256.223
ENSG00000223396.4	RPS10P7	57.1007	9.53021	88.8143	3.20449	4.2279e-14	1.84643e-13	11.1691	7.89135	92.3233	81.0821	93.0376
ENSG00000100784.12	RPS6KA5	14.6423	5.52188	20.7227	1.91833	0.0060061	0.0109	4.46763	6.57613	18.4647	26.7202	16.9831
ENSG00000136643.12	RPS6KC1	929.25	375.744	1298.25	1.78481	6.99376e-103	1.77362e-101	389.8	361.687	1311.96	1330.48	1252.32
ENSG00000198208.12	RPS6KL1	15.0387	0.558453	24.6922	5.35539	0.00035092	0.000759689	1.11691	0	20.4083	28.563	25.1054
ENSG00000116954.8	RRAGC	1004.57	505.826	1337.06	1.401	4.86099e-81	9.64418e-80	517.128	494.525	1336.26	1325.88	1349.05
ENSG00000025039.15	RRAGD	38.3468	1.87368	62.6622	5.10539	6.58726e-09	2.15792e-08	1.11691	2.63045	66.084	67.2613	54.6411
ENSG00000143303.12	RRNAD1	243.002	143.684	309.214	1.10237	9.3573e-15	4.20143e-14	151.899	135.468	287.66	329.857	310.125
ENSG00000052749.14	RRP12	898.962	169.456	1385.3	3.03319	7.7207e-187	3.89681e-185	165.302	173.61	1365.41	1428.15	1362.34
ENSG00000136444.10	RSAD1	442.902	199.597	605.106	1.60091	2.51184e-39	2.40253e-38	188.757	210.436	649.179	618.251	547.888
ENSG00000130363.13	RSPH3	247.222	152.979	310.05	1.00845	4.3806e-12	1.72804e-11	173.121	132.838	329.448	306.822	293.881
ENSG00000215012.9	RTL10	419.456	232.331	544.206	1.23209	4.33381e-30	3.27892e-29	220.031	244.632	530.616	559.282	542.719
ENSG00000040608.14	RTN4R	61.863	7.2964	98.2407	3.76221	3.9245e-15	1.7917e-14	6.70144	7.89135	103.985	79.2393	111.497
ENSG00000225855.7	RUSC1-AS1	42.6216	19.3579	58.1307	1.58159	8.05499e-05	0.000187237	18.9874	19.7284	77.7459	47.9122	48.734
ENSG00000130254.12	SAFB2	800.511	362.299	1092.65	1.60085	3.95958e-58	5.52239e-57	311.617	412.981	1071.92	1117.64	1088.39
ENSG00000130590.14	SAMD10	33.7722	6.17949	52.1674	3.10463	1.14709e-08	3.70063e-08	4.46763	7.89135	52.4785	51.5977	52.426
ENSG00000186193.9	SAPCD2	53.3291	11.0438	81.5193	2.90614	2.78666e-12	1.10972e-11	8.93525	13.1523	71.915	81.0821	91.5608
ENSG00000152700.14	SAR1B	1644.3	632.339	2318.95	1.86916	1.08092e-141	3.96893e-140	684.664	580.014	2339.18	2370.73	2246.93
ENSG00000175467.15	SART1	693.846	419.741	876.583	1.06756	1.34969e-29	1.00497e-28	383.099	456.383	835.769	924.152	869.828
ENSG00000116521.11	SCAMP3	791.946	492.027	991.892	1.01267	1.5248e-36	1.36967e-35	494.79	489.264	965.993	976.671	1033.01
ENSG00000099194.6	SCD	10042.9	1058.36	16032.5	3.92066	0	0	1071.11	1045.6	15537.5	15770.5	16789.6
ENSG00000184178.16	SCFD2	570.101	171.841	835.608	2.2692	2.83087e-88	6.19552e-87	197.692	145.99	836.741	835.699	834.385
ENSG00000047634.15	SCML1	270.774	83.6737	395.507	2.23501	1.3233e-45	1.45216e-44	87.1187	80.2287	419.828	391.59	375.104
ENSG00000102098.19	SCML2	11.7749	3.6482	17.1927	2.23936	0.00537439	0.00983423	3.35072	3.94568	20.4083	15.6636	15.5063
ENSG00000166257.10	SCN3B	15.4174	0	25.6957	6.85458	7.22922e-06	1.87006e-05	0	0	21.3801	23.9561	31.7509
ENSG00000260428.3	SCX	16.3002	6.53962	22.8072	1.78268	0.00502362	0.00923381	7.81835	5.2609	25.2674	23.9561	19.1982
ENSG00000143751.10	SDE2	360.423	199.821	467.491	1.22388	1.38837e-25	9.18959e-25	201.043	198.599	470.363	488.336	443.775
ENSG00000166562.9	SEC11C	222.366	95.5734	306.894	1.68517	6.61246e-25	4.28166e-24	93.8202	97.3267	277.942	336.307	306.433
ENSG00000148396.18	SEC16A	2415.96	1101.88	3292.01	1.57855	5.00269e-192	2.62769e-190	1106.85	1096.9	3317.81	3281.98	3276.25
ENSG00000120341.18	SEC16B	58.1435	21.0333	82.8837	1.96906	5.96441e-08	1.82645e-07	22.3381	19.7284	108.844	68.1827	71.6242
ENSG00000265808.4	SEC22B	3125.06	1680.12	4088.35	1.28122	8.42065e-144	3.15927e-142	1726.74	1633.51	4127.34	4103.86	4033.84
ENSG00000275140.1	SEC22B3P	93.4668	0	155.778	9.44393	8.78846e-11	3.2178e-10	0	0	176.872	161.243	129.219
ENSG00000101310.17	SEC23B	586.771	358.259	739.112	1.04213	3.44876e-26	2.3224e-25	371.93	344.589	698.742	797.922	720.672
ENSG00000107651.14	SEC23IP	1488.41	582.611	2092.27	1.84539	1.68316e-165	7.53773e-164	570.739	594.482	2128.3	2094.31	2054.21
ENSG00000113615.13	SEC24A	1709	596.823	2450.46	2.03357	3.13831e-189	1.6102e-187	625.468	568.177	2522.86	2450.89	2377.63
ENSG00000025796.14	SEC63	3050.73	1808.28	3879.03	1.10116	4.25687e-110	1.16332e-108	1823.91	1792.65	3800.8	3879.96	3956.31
ENSG00000228057.1	SEC63P1	6.33484	0	10.5581	5.57396	0.000948395	0.00193462	0	0	9.71824	6.44971	15.5063
ENSG00000138018.18	SELENOI	724.081	257.696	1035	2.00328	8.97014e-94	2.10276e-92	260.239	255.154	1073.87	1054.99	976.156
ENSG00000131871.15	SELENOS	968.571	580.784	1227.1	1.0831	5.20534e-43	5.42048e-42	539.466	622.102	1208.95	1265.07	1207.27
ENSG00000012171.20	SEMA3B	2611.49	536.546	3994.78	2.90183	0	0	497.024	576.069	4054.45	3972.1	3957.79
ENSG00000185495.10	SEPTIN7P13	54.3566	22.2493	75.7615	1.76527	7.24611e-08	2.20456e-07	23.455	21.0436	76.7741	70.0255	80.4849
ENSG00000120742.11	SERP1	3239.17	1563.03	4356.6	1.47993	1.58335e-191	8.23288e-190	1534.63	1591.42	4283.8	4430.95	4355.05
ENSG00000145391.14	SETD7	3571.47	2035.3	4595.59	1.17382	1.43646e-136	5.10503e-135	2074.1	1996.51	4656.01	4582.98	4547.77
ENSG00000136169.16	SETDB2	202.566	98.303	272.075	1.47516	8.72882e-19	4.64787e-18	92.7033	103.903	278.914	244.168	293.142
ENSG00000174938.14	SEZ6L2	237.276	48.7418	362.966	2.90955	2.24299e-49	2.66323e-48	43.5594	53.9242	348.885	342.756	397.256
ENSG00000163935.14	SFMBT1	55.0112	32.9956	69.6883	1.07517	0.00042247	0.000904417	35.741	30.2502	73.8586	59.8902	75.3162
ENSG00000183605.17	SFXN4	173.573	72.2437	241.126	1.74873	4.47641e-19	2.41848e-18	60.313	84.1744	232.266	271.809	219.303
ENSG00000197860.10	SGTB	658.209	272.91	915.074	1.74336	8.85431e-78	1.6938e-76	281.461	264.36	893.106	930.602	921.515
ENSG00000160999.10	SH2B2	9.19656	2.33297	13.7723	2.52063	0.009193	0.0161649	3.35072	1.31523	14.5774	15.6636	11.0759
ENSG00000189410.12	SH2D5	85.0857	16.4665	130.832	3.00199	4.09401e-20	2.28848e-19	14.5198	18.4132	130.224	130.837	131.434
ENSG00000224660.2	SH3BP5-AS1	58.9024	36.9778	73.5188	1.002	0.00114985	0.00231962	27.9227	46.0329	82.6051	73.711	64.2402
ENSG00000253251.3	SHLD3	23.8199	13.9352	30.4098	1.13039	0.0165893	0.027983	13.4029	14.4675	31.0984	27.6416	32.4893
ENSG00000168779.20	SHOX2	13.8477	1.21607	22.2688	4.20622	0.000220639	0.00048882	1.11691	1.31523	22.352	19.3491	25.1054
ENSG00000164403.15	SHROOM1	81.9767	48.9036	104.025	1.08992	1.04939e-05	2.66956e-05	49.1439	48.6633	111.76	90.296	110.021
ENSG00000052723.12	SIKE1	615.087	339.486	798.82	1.22833	2.48009e-39	2.37363e-38	368.579	310.393	795.924	808.978	791.558
ENSG00000204351.12	SKIV2L	980.108	593.67	1237.73	1.05634	7.11084e-43	7.36514e-42	616.533	570.808	1245.88	1284.41	1182.91
ENSG00000109171.15	SLAIN2	986.807	562.595	1269.62	1.17699	1.81139e-48	2.1199e-47	551.752	573.438	1254.63	1205.18	1349.05
ENSG00000126903.16	SLC10A3	483.226	274.199	622.577	1.18713	2.30504e-28	1.65738e-27	266.941	281.458	572.404	636.679	658.647
ENSG00000120519.15	SLC10A7	116.248	47.9485	161.78	1.74666	2.54628e-15	1.17215e-14	52.4946	43.4024	153.548	172.3	159.493
ENSG00000110911.17	SLC11A2	610.549	209.91	877.642	2.0624	3.45736e-92	7.90144e-91	213.329	206.49	893.106	859.655	880.165
ENSG00000163406.11	SLC15A2	17.8791	1.21607	28.9877	4.58228	3.686e-05	8.90051e-05	1.11691	1.31523	27.2111	33.17	26.5822
ENSG00000226419.8	SLC16A1-AS1	63.0501	36.2837	80.8943	1.15856	2.79622e-05	6.84262e-05	35.741	36.8263	78.7178	82.0035	81.9617
ENSG00000174327.7	SLC16A13	31.0867	17.3851	40.2211	1.20526	0.00343005	0.0064532	18.9874	15.7827	36.9293	42.3838	41.35
ENSG00000119899.13	SLC17A5	1234.89	423.108	1776.08	2.0692	6.38669e-172	2.93655e-170	426.658	419.557	1755.11	1784.73	1788.39
ENSG00000101194.18	SLC17A9	546.628	214.972	767.732	1.83461	6.91121e-69	1.1515e-67	215.563	214.382	783.29	785.944	733.963
ENSG00000146409.12	SLC18B1	182.408	24.8433	287.452	3.50598	1.4303e-41	1.43632e-40	31.2734	18.4132	270.167	319.722	272.467
ENSG00000117479.15	SLC19A2	129.429	30.4643	195.406	2.66571	1.06405e-26	7.25682e-26	34.6241	26.3045	204.083	202.705	179.43
ENSG00000163393.13	SLC22A15	146.759	65.7929	200.736	1.59798	5.57851e-16	2.64663e-15	73.7158	57.8699	220.604	188.884	192.721
ENSG00000197375.13	SLC22A5	91.3857	51.8942	117.713	1.17718	9.15738e-07	2.56589e-06	52.4946	51.2938	136.055	107.802	109.282
ENSG00000213901.11	SLC23A3	28.4194	12.62	38.9523	1.61356	0.000744059	0.00154257	13.4029	11.837	45.6757	42.3838	28.7974
ENSG00000177542.11	SLC25A22	367.453	153.423	510.141	1.74291	1.16052e-41	1.16768e-40	138.496	168.349	479.109	515.977	535.335
ENSG00000234771.3	SLC25A25-AS1	37.3953	21.8892	47.7327	1.12378	0.00381469	0.00713011	20.1043	23.6741	59.2813	43.3052	40.6117
ENSG00000197119.13	SLC25A29	188.37	44.77	284.103	2.69725	2.12058e-35	1.85956e-34	29.0396	60.5004	275.026	293.001	284.282
ENSG00000164933.12	SLC25A32	530.532	275.603	700.484	1.34401	8.69506e-39	8.22527e-38	288.162	263.045	653.066	726.975	721.411
ENSG00000125434.11	SLC25A35	27.782	12.0615	38.2624	1.65901	0.000420809	0.000901235	12.286	11.837	44.7039	36.8555	33.2277
ENSG00000162241.12	SLC25A45	74.0335	32.3745	101.806	1.66256	1.63593e-09	5.5822e-09	27.9227	36.8263	101.07	106.881	97.468
ENSG00000198246.9	SLC29A3	82.4215	47.3901	105.776	1.1523	1.77301e-06	4.84785e-06	51.3777	43.4024	103.013	108.724	105.59
ENSG00000253861.1	SLC2A3P1	22.035	0	36.725	7.36365	1.34868e-06	3.72843e-06	0	0	23.3238	54.3619	32.4893
ENSG00000104154.7	SLC30A4	653.528	318.975	876.563	1.45158	1.71424e-47	1.95742e-46	355.176	282.773	894.078	838.463	897.148
ENSG00000145740.19	SLC30A5	1559.38	709.035	2126.28	1.58329	2.1356e-139	7.67774e-138	717.054	701.015	2125.38	2150.52	2102.95
ENSG00000152683.14	SLC30A6	781.286	398.066	1036.77	1.38238	9.87488e-62	1.47694e-60	397.619	398.513	1023.33	1012.61	1074.36
ENSG00000162695.12	SLC30A7	748.221	431.286	959.511	1.14974	1.50853e-39	1.44824e-38	445.646	416.926	1015.56	948.108	914.87
ENSG00000014824.14	SLC30A9	1340	795.532	1702.98	1.10194	3.25342e-53	4.1905e-52	742.743	848.32	1647.24	1747.87	1713.81
ENSG00000136868.11	SLC31A1	2084.42	742.536	2979.01	2.00661	4.68691e-228	3.07727e-226	724.872	760.2	2907.7	2976.08	3053.26
ENSG00000117620.15	SLC35A3	385.982	188.344	517.74	1.45211	1.92861e-33	1.59721e-32	204.394	172.295	546.165	490.178	516.876
ENSG00000127526.15	SLC35E1	2432.48	920.432	3440.51	1.90317	6.816e-251	4.9584e-249	913.63	927.234	3404.3	3420.19	3497.03
ENSG00000213699.9	SLC35F6	1424.13	502.512	2038.54	2.02112	8.67411e-177	4.08527e-175	502.608	502.416	1978.63	2047.32	2089.65
ENSG00000168917.9	SLC35G2	97.7506	40.0675	136.206	1.77742	7.04599e-11	2.59638e-10	30.1565	49.9786	157.436	138.208	112.974
ENSG00000180773.15	SLC36A4	430.334	127.489	632.23	2.31333	6.59152e-70	1.11991e-68	119.509	135.468	674.446	625.622	596.622
ENSG00000134955.12	SLC37A2	28.7687	6.44046	43.6542	2.73035	8.09649e-07	2.27645e-06	8.93525	3.94568	39.8448	42.3838	48.734
ENSG00000157637.13	SLC38A10	2560.29	1388.14	3341.73	1.27013	1.21486e-92	2.79708e-91	1304.55	1471.74	3396.53	3231.31	3397.35
ENSG00000017483.15	SLC38A5	114.062	25.0416	173.409	2.77987	6.99181e-24	4.40578e-23	29.0396	21.0436	174.928	154.793	190.506
ENSG00000138821.13	SLC39A8	30.3619	14.8538	40.7006	1.4391	0.000853982	0.00175172	17.8705	11.837	39.8448	42.3838	39.8733
ENSG00000136052.9	SLC41A2	510.661	84.1957	794.971	3.22582	1.14838e-114	3.35106e-113	96.054	72.3374	782.318	793.315	809.279
ENSG00000076351.13	SLC46A1	227.04	129.66	291.96	1.17913	1.08768e-15	5.08405e-15	117.275	142.044	295.435	279.18	301.265
ENSG00000139508.15	SLC46A3	288.5	79.7281	427.681	2.41633	3.98419e-53	5.11475e-52	87.1187	72.3374	406.223	436.738	440.083
ENSG00000050438.17	SLC4A8	30.6734	18.3401	38.8956	1.09134	0.00954614	0.0167536	15.6367	21.0436	45.6757	34.0913	36.9197
ENSG00000169241.19	SLC50A1	313.287	187.128	397.393	1.08126	2.426e-18	1.26782e-17	203.277	170.979	385.814	401.725	404.64
ENSG00000198743.7	SLC5A3	268.213	155.474	343.372	1.13642	2.47418e-12	9.90119e-12	182.056	128.892	345.969	303.137	381.011
ENSG00000040487.13	SLC66A1	136.771	75.0621	177.911	1.24114	4.17977e-11	1.5625e-10	80.4173	69.7069	169.097	181.513	183.122
ENSG00000174899.12	SLC66A1L	61.7836	23.6637	87.1968	1.88714	1.5439e-09	5.27514e-09	22.3381	24.9893	80.6614	93.0602	87.8688
ENSG00000063127.16	SLC6A16	47.9359	3.6482	77.461	4.41464	4.99158e-12	1.96455e-11	3.35072	3.94568	86.4924	72.7896	73.101
ENSG00000151012.13	SLC7A11	2111.14	844.091	2955.85	1.80836	7.37368e-164	3.24589e-162	825.394	862.788	3078.74	2980.69	2808.11
ENSG00000092068.20	SLC7A8	36.6335	9.53021	54.7024	2.51042	6.61651e-08	2.02015e-07	11.1691	7.89135	49.563	52.5191	62.0251
ENSG00000154760.14	SLFN13	20.3007	8.05317	28.4658	1.83411	0.00284618	0.00542122	5.58453	10.5218	39.8448	24.8775	20.675
ENSG00000166750.10	SLFN5	3018.66	933.881	4408.51	2.24044	0	0	910.279	957.484	4309.07	4567.32	4349.14
ENSG00000213599.10	SLX1A-SULT1A3	97.9702	20.0782	149.898	2.88902	2.84573e-08	8.92242e-08	25.6889	14.4675	198.252	94.9029	156.539
ENSG00000260280.5	SLX1B-SULT1A4	28.7602	10.026	41.2496	2.06932	7.36969e-05	0.000172185	5.58453	14.4675	39.8448	50.6763	33.2277
ENSG00000101596.16	SMCHD1	870.47	499.448	1117.82	1.16004	3.21307e-48	3.73773e-47	514.894	484.003	1084.56	1166.48	1102.42
ENSG00000176994.11	SMCR8	617.066	239.654	868.675	1.85873	1.74403e-67	2.85362e-66	241.252	238.056	888.247	797	920.777
ENSG00000261556.10	SMG1P7	146.061	83.8094	187.562	1.16259	1.50568e-09	5.14569e-09	78.1835	89.4353	191.449	207.312	163.923
ENSG00000232860.8	SMG7-AS1	26.2187	5.16174	40.2567	3.03115	2.30361e-06	6.23592e-06	1.11691	9.20658	42.7603	43.3052	34.7045
ENSG00000286920.2	SMIM40	9.66064	0	16.1011	6.17144	0.000135577	0.00030807	0	0	10.6901	25.7989	11.8143
ENSG00000172594.13	SMPDL3A	124.527	64.5142	164.536	1.34697	3.28824e-11	1.23819e-10	65.8975	63.1308	160.351	179.671	153.586
ENSG00000135632.12	SMYD5	340.632	151.351	466.82	1.63106	2.11886e-37	1.94848e-36	139.613	163.088	483.968	446.873	469.618
ENSG00000247092.7	SNHG10	32.6088	19.5562	41.3106	1.08742	0.0071626	0.0128113	16.7536	22.3588	46.6476	35.9341	41.35
ENSG00000234912.12	SNHG20	55.4261	26.2577	74.8718	1.50273	2.00669e-06	5.46367e-06	30.1565	22.3588	68.0277	78.318	78.2697
ENSG00000182600.9	SNORC	8.79942	2.63045	12.9121	2.37278	0.0308009	0.0494928	0	5.2609	10.6901	7.3711	20.675
ENSG00000101298.15	SNPH	315.465	168.501	413.441	1.29533	5.24947e-23	3.22396e-22	168.653	168.349	439.265	375.005	426.053
ENSG00000106266.11	SNX8	196.709	116.32	250.303	1.11821	2.18189e-11	8.29451e-11	97.1709	135.468	232.266	257.989	260.653
ENSG00000005513.10	SOX8	58.2795	14.8538	87.2301	2.53168	7.92843e-12	3.08206e-11	17.8705	11.837	97.1824	88.4532	76.0545
ENSG00000104450.13	SPAG1	37.0907	22.1502	47.051	1.07108	0.0117673	0.0203521	24.5719	19.7284	59.2813	51.5977	30.2741
ENSG00000008294.21	SPAG9	2691.92	1670.4	3372.93	1.01418	2.21013e-84	4.60295e-83	1636.27	1704.53	3435.4	3395.31	3288.07
ENSG00000133104.14	SPART	1332.11	783.549	1697.83	1.11708	3.91003e-68	6.46594e-67	774.016	793.081	1668.62	1696.27	1728.58
ENSG00000162814.11	SPATA17	15.1977	3.84652	22.7652	2.62466	0.00081716	0.0016793	1.11691	6.57613	26.2393	18.4278	23.6286
ENSG00000152582.14	SPEF2	94.7919	25.0781	141.268	2.50544	2.04484e-18	1.07152e-17	21.2212	28.935	137.027	157.557	129.219
ENSG00000197912.16	SPG7	1122.91	649.014	1438.84	1.14547	1.22601e-54	1.62229e-53	674.612	623.417	1504.38	1395.9	1416.24
ENSG00000163611.11	SPICE1	130.95	70.036	171.56	1.28793	2.33195e-10	8.3546e-10	70.3651	69.7069	175.9	188.884	149.894
ENSG00000134278.15	SPIRE1	1517.79	907.786	1924.46	1.08545	1.13331e-70	1.94685e-69	885.707	929.864	1905.75	1955.18	1912.44
ENSG00000204991.11	SPIRE2	32.5999	17.9435	42.3708	1.22838	0.00250622	0.00480975	20.1043	15.7827	47.6194	39.6197	39.8733
ENSG00000169682.18	SPNS1	752.105	401.84	985.615	1.29293	4.96052e-54	6.51936e-53	414.372	389.307	987.373	960.086	1009.38
ENSG00000183018.9	SPNS2	8.97136	1.11691	14.2077	3.57001	0.00386886	0.00722349	2.23381	0	18.4647	13.8208	10.3375
ENSG00000198369.10	SPRED2	524.29	320.598	660.085	1.04041	2.44268e-26	1.64992e-25	329.487	311.708	684.164	621.937	674.153
ENSG00000136158.12	SPRY2	263.876	154.889	336.533	1.11431	6.46014e-17	3.18891e-16	166.419	143.36	328.477	343.678	337.446
ENSG00000123178.15	SPRYD7	160.895	88.9346	208.869	1.22925	6.60239e-12	2.58083e-11	87.1187	90.7505	218.66	221.133	186.814
ENSG00000162032.16	SPSB3	376.558	203.866	491.686	1.27389	5.00548e-28	3.5627e-27	199.926	207.806	467.447	489.257	518.352
ENSG00000165389.7	SPTSSA	434.575	254.424	554.675	1.11508	1.41527e-19	7.75994e-19	297.097	211.751	563.658	543.619	556.749
ENSG00000179119.15	SPTY2D1	994.463	316.417	1446.49	2.18608	3.41763e-143	1.27299e-141	339.54	293.295	1456.76	1468.69	1414.02
ENSG00000134548.11	SPX	33.6607	0.558453	55.7289	6.53199	7.14777e-06	1.85085e-05	1.11691	0	55.394	42.3838	69.409
ENSG00000104549.12	SQLE	1548.09	768.956	2067.52	1.42684	3.56191e-112	1.00167e-110	760.613	777.298	2101.08	2087.86	2013.6
ENSG00000161011.20	SQSTM1	11109.2	2797.75	16650.1	2.5726	0	0	2841.41	2754.08	16327.6	17317.5	16305.2
ENSG00000213523.11	SRA1	629.753	326.642	831.827	1.34331	1.00538e-37	9.31718e-37	342.89	310.393	855.205	886.375	753.9
ENSG00000072310.17	SREBF1	597.92	321.537	782.174	1.28975	7.92686e-40	7.67667e-39	289.279	353.796	785.234	767.516	793.773
ENSG00000196220.16	SRGAP3	79.5511	17.5834	120.863	2.78827	1.00692e-17	5.12723e-17	16.7536	18.4132	118.563	113.331	130.696
ENSG00000125508.3	SRMS	8.45655	0	14.0943	5.9883	0.00018793	0.000419593	0	0	11.6619	12.8994	17.7214
ENSG00000100883.13	SRP54	1840.54	705.913	2596.96	1.88418	4.07486e-146	1.55901e-144	641.104	770.722	2577.28	2657.28	2556.32
ENSG00000182934.12	SRPRA	4384.36	1621.94	6225.97	1.94037	0	0	1634.03	1609.84	6139.99	6249.77	6288.16
ENSG00000144867.13	SRPRB	1387.52	684.713	1856.06	1.4382	8.67348e-94	2.0363e-92	694.716	674.711	1770.66	1929.39	1868.14
ENSG00000271303.2	SRXN1	960.407	572.757	1218.84	1.09138	2.17099e-47	2.47349e-46	548.401	597.112	1222.55	1250.32	1183.65
ENSG00000184402.15	SS18L1	233.701	130.38	302.581	1.21901	1.52933e-17	7.7441e-17	123.977	136.783	309.04	289.316	309.387
ENSG00000117155.17	SSX2IP	120.039	53.867	164.153	1.61326	5.56576e-14	2.41641e-13	52.4946	55.2395	151.605	162.164	178.691
ENSG00000064225.12	ST3GAL6	56.8702	31.0228	74.1017	1.24388	4.72288e-05	0.000112586	35.741	26.3045	69.9713	82.9249	69.409
ENSG00000118007.13	STAG1	1123.66	554.198	1503.3	1.43562	1.45709e-72	2.57149e-71	579.675	528.721	1516.05	1574.65	1419.19
ENSG00000136738.15	STAM	655.283	321.12	878.058	1.44906	1.09065e-50	1.33488e-49	338.423	303.817	820.22	902.039	911.916
ENSG00000109689.19	STIM2	133.35	59.9109	182.309	1.60212	2.25685e-13	9.52597e-13	65.8975	53.9242	184.647	154.793	207.489
ENSG00000204344.15	STK19	410.401	246.788	519.475	1.07351	1.3974e-23	8.738e-23	242.369	251.208	522.841	537.169	498.416
ENSG00000134910.14	STT3A	4306.85	2181.09	5724.02	1.39156	2.78657e-146	1.06876e-144	2239.4	2122.77	5619.09	5577.16	5975.82
ENSG00000166900.17	STX3	274.255	120.949	376.46	1.6449	4.03167e-32	3.21683e-31	111.691	130.207	373.18	375.926	380.273
ENSG00000076944.16	STXBP2	287.754	160.484	372.601	1.21558	2.9435e-20	1.65132e-19	155.25	165.718	399.42	360.263	358.121
ENSG00000094975.14	SUCO	1476.93	332.127	2240.13	2.74756	6.94417e-262	5.27451e-260	355.176	309.078	2272.13	2220.54	2227.73
ENSG00000203446.2	SUGCT-AS1	16.7569	0.657613	27.4898	5.49796	0.000220983	0.000489512	0	1.31523	33.042	25.7989	23.6286
ENSG00000196235.14	SUPT5H	1919.92	1153.81	2430.66	1.07491	1.6387e-83	3.39007e-82	1151.53	1156.08	2407.21	2473.93	2410.86
ENSG00000156502.14	SUPV3L1	540.685	221.361	753.568	1.77592	3.43728e-59	4.89978e-58	195.459	247.262	734.699	783.18	742.824
ENSG00000116668.13	SWT1	64.6168	39.5352	81.3379	1.03025	0.000200125	0.000445472	43.5594	35.5111	90.3797	78.318	75.3162
ENSG00000159082.18	SYNJ1	287.963	170.067	366.56	1.09684	1.65558e-15	7.676e-15	195.459	144.675	377.068	370.398	352.214
ENSG00000275066.5	SYNRG	603.93	348.233	774.395	1.1496	1.09092e-36	9.85069e-36	366.345	330.122	783.29	756.459	783.436
ENSG00000143028.9	SYPL2	86.1882	31.8787	122.395	1.94015	3.28189e-13	1.37514e-12	33.5072	30.2502	114.675	118.859	133.649
ENSG00000143469.20	SYT14	5.86273	0	9.77122	5.44735	0.00123535	0.0024795	0	0	10.6901	11.978	6.64554
ENSG00000011347.10	SYT7	75.1729	19.5562	112.251	2.53585	1.83024e-15	8.47565e-15	16.7536	22.3588	114.675	103.195	118.881
ENSG00000162298.19	SYVN1	711.01	367.007	940.346	1.35809	1.46684e-53	1.90358e-52	369.696	364.317	893.106	962.85	965.081
ENSG00000152382.6	TADA1	160.783	69.0183	221.96	1.68714	1.87165e-20	1.05883e-19	67.0144	71.0222	221.576	225.74	218.565
ENSG00000197780.10	TAF13	967.682	501.411	1278.53	1.34752	3.65107e-53	4.69099e-52	537.232	465.59	1188.54	1326.8	1320.25
ENSG00000143498.18	TAF1A	62.686	25.1407	87.7162	1.79333	3.56944e-09	1.18866e-08	27.9227	22.3588	89.4078	86.6104	87.1305
ENSG00000141384.13	TAF4B	30.446	15.8089	40.2041	1.35083	0.00177076	0.00347624	14.5198	17.0979	46.6476	34.0913	39.8733
ENSG00000148835.11	TAF5	108.615	61.1634	140.25	1.20253	4.60979e-08	1.42062e-07	59.1961	63.1308	144.802	121.623	154.324
ENSG00000273841.5	TAF9	649.633	330.399	862.455	1.38726	1.64697e-53	2.13555e-52	322.786	338.013	838.684	859.655	889.026
ENSG00000263327.6	TAPT1-AS1	20.2156	10.7463	26.5286	1.28974	0.015212	0.0258312	12.286	9.20658	27.2111	29.4844	22.8902
ENSG00000059588.10	TARBP1	316.861	144.341	431.875	1.57442	1.90397e-31	1.48625e-30	151.899	136.783	444.124	454.244	397.256
ENSG00000108021.20	TASOR2	1406.09	821.262	1795.97	1.12752	9.12106e-67	1.46761e-65	845.498	797.026	1817.31	1738.66	1831.95
ENSG00000121749.16	TBC1D15	986.292	353.62	1408.07	1.98729	2.62929e-125	8.47003e-124	379.748	327.491	1434.41	1394.98	1394.83
ENSG00000104946.13	TBC1D17	794.284	458.175	1018.36	1.15316	5.47335e-42	5.52506e-41	461.282	455.068	1028.19	959.165	1067.72
ENSG00000162065.14	TBC1D24	517.353	167.582	750.534	2.16462	7.9439e-85	1.66339e-83	164.185	170.979	758.023	746.324	747.254
ENSG00000204634.13	TBC1D8	90.8301	51.795	116.854	1.17327	3.21036e-07	9.28764e-07	53.6115	49.9786	110.788	117.938	121.835
ENSG00000204219.11	TCEA3	274.986	138.919	365.698	1.39274	1.98118e-23	1.23435e-22	146.315	131.523	341.11	393.433	362.551
ENSG00000182916.8	TCEAL7	210.456	128.606	265.023	1.04587	1.07374e-12	4.38989e-12	121.743	135.468	270.167	267.202	257.699
ENSG00000137310.12	TCF19	211.3	86.9983	294.168	1.764	7.55611e-26	5.05317e-25	79.3004	94.6962	316.815	271.809	293.881
ENSG00000081059.20	TCF7	24.0931	6.89976	35.5553	2.31971	7.58104e-05	0.00017683	11.1691	2.63045	30.1266	39.6197	36.9197
ENSG00000145022.4	TCTA	1038.19	620.716	1316.5	1.08824	2.12902e-45	2.32482e-44	578.558	662.874	1300.3	1359.97	1289.24
ENSG00000182134.16	TDRKH	202.739	4.40497	334.962	6.30529	8.62538e-30	6.45965e-29	2.23381	6.57613	341.11	341.835	321.94
ENSG00000203288.4	TDRKH-AS1	10.0973	0	16.8289	6.2367	7.87322e-05	0.000183259	0	0	13.6055	22.1133	14.7679
ENSG00000151287.17	TEX30	93.3257	38.481	129.889	1.73364	3.71056e-10	1.31568e-09	48.027	28.935	154.52	124.387	110.759
ENSG00000240021.10	TEX35	21.7711	0	36.2851	7.34443	9.02976e-07	2.5315e-06	0	0	36.9293	38.6983	33.2277
ENSG00000162851.8	TFB2M	244.661	146.387	310.177	1.08936	6.4001e-15	2.898e-14	136.263	156.512	293.491	322.486	314.556
ENSG00000072274.13	TFRC	3663.08	2141.38	4677.56	1.12604	2.97338e-114	8.62782e-113	2212.59	2070.16	4679.33	4606.94	4746.39
ENSG00000088451.11	TGDS	195.369	71.8367	277.724	1.93209	8.1461e-26	5.436e-25	87.1187	56.5547	290.575	281.945	260.653
ENSG00000069702.11	TGFBR3	92.2437	56.6228	115.991	1.02409	8.93828e-06	2.28961e-05	65.8975	47.3481	110.788	119.78	117.405
ENSG00000180176.15	TH	10.1237	0	16.8729	6.23512	8.44969e-05	0.000195912	0	0	23.3238	14.7422	12.5527
ENSG00000177683.14	THAP5	348.484	201.893	446.211	1.14533	1.55643e-23	9.72458e-23	199.926	203.86	440.236	448.716	449.682
ENSG00000174796.12	THAP6	180.877	91.0796	240.741	1.4175	7.55181e-15	3.40755e-14	70.3651	111.794	244.9	239.561	237.763
ENSG00000184436.12	THAP7	218.383	116.184	286.516	1.31144	2.13956e-17	1.07673e-16	106.106	126.262	268.223	285.63	305.695
ENSG00000251022.6	THAP9-AS1	482.426	287.054	612.675	1.09995	1.90008e-25	1.25284e-24	270.291	303.817	596.7	587.845	653.478
ENSG00000130193.8	THEM6	346.768	52.5518	542.913	3.37166	3.94579e-77	7.49266e-76	52.4946	52.609	511.18	529.798	587.761
ENSG00000130775.16	THEMIS2	28.3495	6.99892	42.5833	2.56583	2.07934e-06	5.64856e-06	10.0522	3.94568	45.6757	41.4624	40.6117
ENSG00000051596.10	THOC3	679.091	262.435	956.861	1.8704	1.50582e-81	3.01455e-80	251.304	273.567	906.712	995.099	968.772
ENSG00000066654.14	THUMPD1	763.652	464.553	963.051	1.04943	5.486e-30	4.13451e-29	463.516	465.59	1033.05	972.985	883.119
ENSG00000221944.9	TIGD1	58.0135	35.0676	73.3107	1.06425	0.000197858	0.000440743	34.6241	35.5111	73.8586	73.711	72.3626
ENSG00000179886.6	TIGD5	186.083	99.3834	243.882	1.29431	9.26484e-16	4.35158e-15	102.755	96.0114	234.21	244.168	253.269
ENSG00000132286.12	TIMM10B	425.23	248.292	543.188	1.12756	6.44101e-25	4.17238e-24	262.473	234.11	517.01	541.776	570.778
ENSG00000075336.12	TIMM21	236.885	129.514	308.465	1.24291	9.64768e-17	4.73522e-16	148.549	110.479	297.378	310.508	317.509
ENSG00000178440.8	TIMM23B-AGAP6	90.7007	47.1291	119.748	1.34891	2.42455e-07	7.08837e-07	46.9101	47.3481	93.2951	138.208	127.742
ENSG00000126953.8	TIMM8A	65.1778	39.697	82.165	1.04042	0.000571238	0.00119872	49.1439	30.2502	80.6614	69.1041	96.7296
ENSG00000157150.5	TIMP4	20.448	9.07092	28.0327	1.63381	0.00610858	0.011064	8.93525	9.20658	32.0702	16.585	35.4429
ENSG00000160606.11	TLCD1	85.3198	27.4737	123.884	2.16514	3.51396e-14	1.53854e-13	31.2734	23.6741	122.45	109.645	139.556
ENSG00000152078.10	TLCD4	10.0364	3.54904	14.3613	1.99832	0.0185509	0.0310015	4.46763	2.63045	16.521	11.0567	15.5063
ENSG00000174130.12	TLR6	47.5797	27.9695	60.6532	1.1194	0.000601906	0.00126	25.6889	30.2502	67.0559	58.0474	56.8563
ENSG00000125304.10	TM9SF2	6147.17	2241.74	8750.79	1.96426	0	0	2267.32	2216.15	8731.84	8740.28	8780.24
ENSG00000170537.13	TMC7	5.8405	0.657613	9.29577	3.92002	0.0183658	0.0307319	0	1.31523	11.6619	11.0567	5.16876
ENSG00000057704.13	TMCC3	15.8272	4.30581	23.5081	2.4771	0.00123193	0.00247391	3.35072	5.2609	15.5492	20.2705	34.7045
ENSG00000143183.18	TMCO1	1480.32	870.871	1886.63	1.11554	5.69443e-70	9.69617e-69	864.486	877.255	1847.44	1948.74	1863.71
ENSG00000241697.5	TMEFF1	5.58003	0	9.30004	5.38687	0.00206135	0.00400963	0	0	11.6619	3.68555	12.5527
ENSG00000109066.14	TMEM104	550.626	253.265	748.866	1.5681	8.83913e-53	1.12912e-51	243.486	263.045	759.967	707.626	779.005
ENSG00000106460.19	TMEM106B	1756.62	794.817	2397.83	1.59321	3.06454e-148	1.19309e-146	795.238	794.396	2429.56	2337.56	2426.36
ENSG00000188735.13	TMEM120B	355.957	222.206	445.125	1.00193	1.02963e-17	5.24117e-17	215.563	228.849	474.25	439.502	421.623
ENSG00000179178.11	TMEM125	7.7724	0.558453	12.5817	4.38117	0.00624713	0.0112925	1.11691	0	9.71824	18.4278	9.59912
ENSG00000146859.6	TMEM140	407.521	214.043	536.507	1.32026	3.65738e-31	2.83923e-30	233.434	194.653	532.56	522.427	554.534
ENSG00000236144.8	TMEM147-AS1	91.1841	52.9484	116.674	1.14467	6.68773e-07	1.88996e-06	48.027	57.8699	118.563	120.702	110.759
ENSG00000179292.5	TMEM151A	18.1471	1.87368	28.9961	3.99518	2.1087e-05	5.20789e-05	1.11691	2.63045	31.0984	24.8775	31.0125
ENSG00000170006.12	TMEM154	18.5447	2.43213	29.2864	3.5994	1.66649e-05	4.1535e-05	2.23381	2.63045	30.1266	26.7202	31.0125
ENSG00000205269.6	TMEM170B	91.2755	37.2388	127.3	1.78625	2.25329e-12	9.03591e-12	32.3903	42.0872	128.281	117.016	136.603
ENSG00000170417.16	TMEM182	37.5725	22.051	47.9202	1.10786	0.00268159	0.00512346	25.6889	18.4132	48.5912	47.9122	47.2572
ENSG00000170088.14	TMEM192	201.337	116.534	257.873	1.1363	3.88259e-13	1.62114e-12	131.795	101.272	254.618	263.517	255.484
ENSG00000188760.11	TMEM198	81.0135	46.9308	103.735	1.14372	2.99267e-06	8.02553e-06	49.1439	44.7177	102.042	97.6671	111.497
ENSG00000253304.2	TMEM200B	184.074	114.175	230.673	1.0135	1.43018e-10	5.18255e-10	113.924	114.425	224.491	246.011	221.518
ENSG00000206432.4	TMEM200C	18.7871	6.8371	26.7538	1.99581	0.00124617	0.0024996	4.46763	9.20658	22.352	31.3272	26.5822
ENSG00000168701.19	TMEM208	372.137	136.053	529.526	1.95081	5.73086e-43	5.96371e-42	156.367	115.74	481.053	568.496	539.027
ENSG00000187824.9	TMEM220	70.8812	43.9402	88.8419	1.01567	9.77081e-05	0.000225229	45.7932	42.0872	79.6896	93.0602	93.776
ENSG00000168569.8	TMEM223	161.054	80.1612	214.983	1.43094	4.20683e-15	1.91777e-14	74.8328	85.4896	194.365	223.897	226.687
ENSG00000224982.4	TMEM233	10.284	1.11691	16.3955	3.78216	0.0018054	0.00354155	2.23381	0	20.4083	11.0567	17.7214
ENSG00000153485.6	TMEM251	145.16	40.1928	215.138	2.41478	2.99841e-26	2.02177e-25	43.5594	36.8263	224.491	189.806	231.117
ENSG00000095209.12	TMEM38B	254.254	22.6721	408.641	4.12438	4.95838e-58	6.90297e-57	33.5072	11.837	399.42	391.59	434.914
ENSG00000176142.13	TMEM39A	705.007	325.948	957.712	1.55145	6.1655e-55	8.19334e-54	350.709	301.187	965.021	892.825	1015.29
ENSG00000166471.11	TMEM41B	507.76	215.792	702.405	1.69934	6.77308e-52	8.48415e-51	221.148	210.436	688.052	758.302	660.862
ENSG00000164953.16	TMEM67	211.98	75.8554	302.73	2.00159	5.05161e-32	4.02234e-31	71.482	80.2287	317.787	284.709	305.695
ENSG00000165071.15	TMEM71	84.9252	1.97284	140.227	6.27048	2.03959e-13	8.63483e-13	0	3.94568	126.337	158.479	135.864
ENSG00000167874.7	TMEM88	6.89816	1.77452	10.3139	2.51105	0.0254643	0.0415074	2.23381	1.31523	13.6055	9.21388	8.12233
ENSG00000251179.1	TMEM92-AS1	9.16481	2.53129	13.5872	2.46272	0.0120583	0.0208229	1.11691	3.94568	14.5774	16.585	9.59912
ENSG00000144747.17	TMF1	1582.03	750.986	2136.06	1.50953	5.48058e-112	1.53565e-110	725.989	775.983	2116.63	2219.62	2071.93
ENSG00000213593.10	TMX2	1323.53	683.748	1750.05	1.35346	4.16716e-80	8.1838e-79	720.405	647.091	1685.14	1769.99	1795.04
ENSG00000104689.10	TNFRSF10A	22.2057	11.1429	29.5809	1.42692	0.00615168	0.0111303	7.81835	14.4675	33.042	27.6416	28.059
ENSG00000157873.18	TNFRSF14	818.481	192.921	1235.52	2.67951	2.66138e-155	1.09968e-153	189.874	195.969	1276.98	1224.52	1205.06
ENSG00000238164.6	TNFRSF14-AS1	44.9929	4.56679	71.9436	3.91146	2.17289e-11	8.26232e-11	7.81835	1.31523	68.9995	62.6544	84.1769
ENSG00000154310.17	TNIK	1119.16	637.224	1440.45	1.17696	5.00727e-62	7.52548e-61	644.455	629.993	1431.5	1400.51	1489.34
ENSG00000173273.16	TNKS	966.548	513.989	1268.25	1.30418	3.6343e-67	5.8967e-66	499.257	528.721	1300.3	1263.22	1241.24
ENSG00000229980.5	TOB1-AS1	5.98188	1.21607	9.1591	2.92211	0.0246585	0.0402914	1.11691	1.31523	10.6901	6.44971	10.3375
ENSG00000198718.13	TOGARAM1	338.428	202.525	429.031	1.08835	9.67412e-20	5.34024e-19	185.407	219.643	442.18	421.074	423.838
ENSG00000141198.16	TOM1L1	272.174	94.0702	390.91	2.07245	6.37817e-34	5.38288e-33	73.7158	114.425	351.8	411.86	409.07
ENSG00000130204.13	TOMM40	543.61	304.674	702.901	1.2131	1.3763e-33	1.14717e-32	279.227	330.122	675.418	706.704	726.579
ENSG00000175768.13	TOMM5	753.961	448.979	957.282	1.0937	2.71301e-32	2.17927e-31	438.944	459.014	889.219	1037.48	945.144
ENSG00000214736.8	TOMM6	739.338	379.862	978.989	1.36845	2.49604e-57	3.44094e-56	373.047	386.676	941.698	985.885	1009.38
ENSG00000177302.15	TOP3A	461.123	215.009	625.199	1.54362	1.6279e-47	1.8602e-46	207.745	222.273	618.08	617.33	640.187
ENSG00000067369.14	TP53BP1	1902.88	767.776	2659.61	1.79421	2.97e-193	1.57603e-191	751.678	783.874	2622.95	2678.47	2677.42
ENSG00000196511.14	TPK1	18.293	8.4133	24.8795	1.56705	0.00736764	0.0131432	8.93525	7.89135	20.4083	23.9561	30.2741
ENSG00000241015.2	TPM3P9	37	22.646	46.5693	1.03856	0.0180761	0.0302963	18.9874	26.3045	56.3658	55.2833	28.059
ENSG00000137364.5	TPMT	560.713	269.857	754.618	1.48376	4.40641e-53	5.64276e-52	271.408	268.306	730.812	770.28	762.761
ENSG00000166340.17	TPP1	1978.29	1196.67	2499.36	1.06129	1.70141e-66	2.72631e-65	1246.47	1146.88	2477.18	2430.62	2590.28
ENSG00000158109.15	TPRG1L	1304.83	704.478	1705.06	1.27705	5.82734e-85	1.2235e-83	686.898	722.059	1690	1716.55	1708.64
ENSG00000176058.13	TPRN	157.723	84.6027	206.469	1.30092	1.03959e-11	4.01505e-11	69.2482	99.9571	213.801	187.042	218.565
ENSG00000170919.16	TPT1-AS1	302.785	170.312	391.1	1.19872	4.40138e-19	2.3796e-18	163.068	177.555	417.884	401.725	353.691
ENSG00000213689.14	TREX1	67.0957	39.5979	85.4275	1.09287	0.000134822	0.000306496	50.2608	28.935	88.436	79.2393	88.6072
ENSG00000101255.11	TRIB3	2003.08	909.836	2731.91	1.58783	4.97588e-28	3.54326e-27	788.536	1031.14	2793.99	2738.36	2663.39
ENSG00000221926.13	TRIM16	382.632	231.637	483.296	1.05984	2.02482e-16	9.78924e-16	227.849	235.425	464.532	548.226	437.129
ENSG00000108448.22	TRIM16L	180.197	77.2071	248.857	1.70405	2.29638e-18	1.2017e-17	63.6637	90.7505	243.928	222.054	280.59
ENSG00000122779.18	TRIM24	267.427	105.526	375.361	1.82084	1.29336e-33	1.07977e-32	115.041	96.0114	399.42	375.926	350.737
ENSG00000204713.11	TRIM27	866.42	443.582	1148.31	1.37187	9.78441e-69	1.62671e-67	447.88	439.285	1123.43	1167.4	1154.11
ENSG00000204599.14	TRIM39	237.508	142.379	300.927	1.08653	4.64972e-14	2.02665e-13	129.561	155.197	312.927	281.945	307.91
ENSG00000132481.7	TRIM47	51.9648	30.5008	66.2741	1.12961	0.000435454	0.000930158	26.8058	34.1959	71.915	55.2833	71.6242
ENSG00000183718.5	TRIM52	183.254	108.851	232.857	1.09437	3.36116e-11	1.26503e-10	107.223	110.479	241.012	247.853	209.704
ENSG00000141569.12	TRIM65	267.937	164.842	336.668	1.01978	2.64014e-13	1.11196e-12	187.64	142.044	350.829	333.542	325.632
ENSG00000146054.18	TRIM7	48.8475	24.2222	65.2644	1.43162	1.31036e-05	3.30361e-05	23.455	24.9893	67.0559	64.4971	64.2402
ENSG00000100815.12	TRIP11	1253.88	710.141	1616.37	1.18441	2.72658e-60	3.94844e-59	741.626	678.656	1656.96	1539.64	1652.53
ENSG00000104907.13	TRMT1	601.868	216.883	858.524	1.98723	5.86362e-86	1.24632e-84	208.862	224.904	868.811	867.947	838.815
ENSG00000066651.20	TRMT11	187.852	109.67	239.973	1.12446	2.0976e-12	8.42682e-12	112.808	106.533	250.731	246.932	222.256
ENSG00000099899.15	TRMT2A	701.704	254.904	999.57	1.97146	6.77917e-96	1.63111e-94	254.655	255.154	970.852	1034.72	993.139
ENSG00000166166.13	TRMT61A	310.009	177.112	398.606	1.17005	5.92921e-21	3.41409e-20	175.354	178.871	420.8	381.455	393.564
ENSG00000167112.10	TRUB2	571.758	248.245	787.434	1.65609	1.05983e-40	1.04267e-39	292.63	203.86	737.615	826.485	798.204
ENSG00000165699.15	TSC1	970.293	455.644	1313.39	1.52704	9.71189e-88	2.10764e-86	460.166	451.122	1328.48	1275.2	1336.49
ENSG00000145777.15	TSLP	271.839	158.438	347.439	1.12998	2.97314e-16	1.42937e-15	170.887	145.99	318.758	356.577	366.982
ENSG00000211460.12	TSN	1277.28	755.866	1624.9	1.10327	2.31841e-58	3.24515e-57	767.315	744.417	1568.52	1693.51	1612.65
ENSG00000117472.10	TSPAN1	51.0247	2.89143	83.1136	4.79032	7.52885e-12	2.93114e-11	4.46763	1.31523	89.4078	65.4185	94.5144
ENSG00000106537.8	TSPAN13	87.2618	32.1397	124.01	1.93378	2.47458e-13	1.04308e-12	37.9748	26.3045	119.534	126.23	126.265
ENSG00000167721.11	TSR1	1151.6	642.161	1491.22	1.2165	2.03988e-72	3.58774e-71	633.286	651.036	1493.69	1486.2	1493.77
ENSG00000178093.14	TSSK6	14.5524	5.2244	20.7711	1.95949	0.00558334	0.0101877	7.81835	2.63045	17.4928	21.1919	23.6286
ENSG00000052841.15	TTC17	1261.92	731.42	1615.58	1.14413	6.96998e-65	1.09533e-63	731.574	731.265	1557.83	1640.07	1648.83
ENSG00000168026.18	TTC21A	48.0201	22.646	64.9362	1.53113	1.13107e-05	2.867e-05	18.9874	26.3045	72.8868	56.2047	65.717
ENSG00000204815.10	TTC25	22.6037	11.8632	29.764	1.31858	0.0108027	0.0187928	14.5198	9.20658	29.1547	23.9561	36.1813
ENSG00000182670.13	TTC3	4721.57	2735.66	6045.5	1.14315	7.39623e-127	2.40261e-125	2777.75	2693.58	6239.11	5920.84	5976.56
ENSG00000183891.6	TTC32	30.0164	12.9174	41.4158	1.69585	0.000181104	0.000405098	10.0522	15.7827	45.6757	38.6983	39.8733
ENSG00000155158.20	TTC39B	325.568	193.939	413.321	1.09271	6.15986e-20	3.41982e-19	193.225	194.653	421.772	394.354	423.838
ENSG00000165533.19	TTC8	313.414	152.368	420.779	1.47031	5.39545e-31	4.17386e-30	142.964	161.773	419.828	423.838	418.669
ENSG00000175764.15	TTLL11	79.2068	36.482	107.69	1.56624	1.79194e-09	6.10511e-09	33.5072	39.4568	110.788	109.645	102.637
ENSG00000127824.14	TUBA4A	210.099	63.4234	307.882	2.25915	9.09555e-35	7.83411e-34	78.1835	48.6633	303.209	316.957	303.48
ENSG00000275835.5	TUBGCP5	356.529	163.141	485.454	1.56905	1.38916e-38	1.30613e-37	169.77	156.512	495.63	483.729	477.002
ENSG00000078246.17	TULP3	645.137	365.613	831.487	1.19247	4.86673e-35	4.22701e-34	326.137	405.089	839.656	810.821	843.984
ENSG00000134744.14	TUT4	476.504	280.144	607.41	1.11423	3.69176e-27	2.5526e-26	281.461	278.828	646.263	593.374	582.593
ENSG00000175106.17	TVP23C	91.1378	54.389	115.637	1.07506	1.55875e-05	3.89814e-05	61.4299	47.3481	137.027	108.724	101.16
ENSG00000259024.6	TVP23C-CDRT4	212.138	67.4056	308.627	2.19206	7.90768e-37	7.16547e-36	70.3651	64.446	303.209	305.901	316.771
ENSG00000086712.13	TXLNG	236.516	147.901	295.593	1.00647	1.36322e-12	5.5383e-12	134.029	161.773	281.829	305.901	299.049
ENSG00000153066.13	TXNDC11	555.577	339.272	699.781	1.04654	3.37524e-29	2.48217e-28	333.955	344.589	669.587	718.682	711.073
ENSG00000140830.9	TXNL4B	187.078	88.7728	252.614	1.51635	6.05199e-20	3.36475e-19	81.5342	96.0114	248.787	250.617	258.438
ENSG00000230454.1	U73166.1	14.6081	6.08033	20.2933	1.73784	0.013364	0.0229191	5.58453	6.57613	29.1547	14.7422	16.9831
ENSG00000117143.13	UAP1	2507	773.919	3662.39	2.24255	2.93576e-178	1.404e-176	763.964	783.874	3588.95	3990.53	3407.69
ENSG00000197355.11	UAP1L1	330.501	87.7186	492.355	2.4893	1.481e-60	2.15273e-59	86.0018	89.4353	528.672	466.222	482.171
ENSG00000081307.14	UBA5	922.536	554.892	1167.63	1.07033	1.65322e-44	1.76911e-43	571.856	537.927	1165.22	1207.94	1129.74
ENSG00000033178.13	UBA6	1177.09	394.256	1698.98	2.10867	4.96547e-168	2.24971e-166	388.684	399.828	1718.19	1672.32	1706.43
ENSG00000248049.7	UBA6-AS1	184.236	84.989	250.401	1.5544	4.32509e-20	2.41504e-19	87.1187	82.8592	256.562	259.831	234.809
ENSG00000137073.23	UBAP2	385.72	223.412	493.925	1.13938	2.73842e-24	1.74761e-23	239.018	207.806	505.349	480.964	495.462
ENSG00000154127.10	UBASH3B	258.576	131.758	343.121	1.37724	1.44167e-19	7.89912e-19	130.678	132.838	373.18	355.656	300.526
ENSG00000120942.14	UBIAD1	318.221	138.621	437.954	1.65274	4.94346e-37	4.49788e-36	149.666	127.577	439.265	440.423	434.175
ENSG00000157741.15	UBN2	227.116	130.01	291.854	1.15791	1.44977e-13	6.18507e-13	142.964	117.055	325.561	270.888	279.113
ENSG00000127481.15	UBR4	2358.94	1366.36	3020.66	1.14588	8.03344e-43	8.29302e-42	1260.99	1471.74	3307.12	2861.83	2893.03
ENSG00000158062.20	UBXN11	195.696	101.158	258.721	1.35374	2.93986e-17	1.46993e-16	104.989	97.3267	260.449	243.246	272.467
ENSG00000104691.16	UBXN8	181.922	100.699	236.071	1.22515	3.59408e-13	1.50311e-12	102.755	98.6419	231.294	259.831	217.088
ENSG00000116750.14	UCHL5	473.885	192.796	661.277	1.78681	1.23372e-50	1.50642e-49	176.471	209.121	623.911	645.893	714.027
ENSG00000014123.10	UFL1	570.35	286.647	759.485	1.40302	1.80741e-49	2.15595e-48	297.097	276.197	770.657	743.56	764.237
ENSG00000120686.12	UFM1	1974.47	782.306	2769.25	1.82585	1.52035e-201	8.53545e-200	758.38	806.233	2747.35	2797.33	2763.07
ENSG00000111647.13	UHRF1BP1L	437.512	269.45	549.552	1.01975	4.11288e-19	2.22673e-18	298.214	240.686	563.658	570.339	514.66
ENSG00000131019.11	ULBP3	97.0632	54.6238	125.356	1.20316	5.69148e-08	1.74563e-07	51.3777	57.8699	126.337	123.466	126.265
ENSG00000168038.11	ULK4	53.8386	18.8621	77.1562	2.0083	8.51066e-09	2.76811e-08	24.5719	13.1523	75.8023	77.3966	78.2697
ENSG00000130477.15	UNC13A	978.053	338.119	1404.68	2.05393	1.09532e-133	3.78838e-132	339.54	336.698	1450.93	1364.58	1398.52
ENSG00000151461.20	UPF2	850.159	462.867	1108.35	1.25689	8.37731e-58	1.16106e-56	482.504	443.231	1098.16	1114.88	1112.02
ENSG00000125351.13	UPF3B	231.624	117.985	307.383	1.3765	2.49381e-20	1.40362e-19	122.86	113.109	303.209	328.014	290.927
ENSG00000183696.14	UPP1	101.482	61.2626	128.295	1.06687	8.63931e-07	2.42599e-06	58.0792	64.446	133.14	133.601	118.143
ENSG00000142207.7	URB1	633.007	350.639	821.253	1.22561	2.2065e-42	2.25229e-41	354.059	347.219	835.769	839.384	788.604
ENSG00000103404.14	USP31	128.526	68.3607	168.636	1.306	1.76926e-11	6.76334e-11	67.0144	69.7069	162.295	168.614	174.999
ENSG00000055483.19	USP36	949.61	320.995	1368.69	2.08974	4.69189e-127	1.53054e-125	325.02	316.969	1418.86	1380.24	1306.96
ENSG00000135913.11	USP37	310.965	113.219	442.795	1.96274	5.021e-45	5.43679e-44	117.275	109.164	446.067	460.694	421.623
ENSG00000166348.19	USP54	82.2839	51.2366	102.982	1.00504	2.01697e-05	4.9885e-05	52.4946	49.9786	104.957	101.353	102.637
ENSG00000183520.12	UTP11	400.591	245.598	503.92	1.0346	3.66819e-21	2.12401e-20	255.772	235.425	479.109	526.112	506.538
ENSG00000011260.14	UTP18	252.291	149.639	320.726	1.09864	2.11445e-13	8.94685e-13	144.081	155.197	325.561	353.813	282.805
ENSG00000108651.10	UTP6	714.639	432.069	903.019	1.05922	4.23893e-33	3.47157e-32	459.049	405.089	875.614	948.108	885.334
ENSG00000163945.19	UVSSA	316.625	169.717	414.564	1.28738	6.88163e-25	4.45409e-24	169.77	169.664	437.321	398.04	408.332
ENSG00000103043.15	VAC14	430.642	264.048	541.704	1.03952	1.08907e-22	6.6203e-22	247.953	280.143	550.053	553.754	521.306
ENSG00000117533.15	VAMP4	457.046	225.087	611.686	1.4383	1.1988e-38	1.12852e-37	242.369	207.806	607.39	586.003	641.664
ENSG00000204394.13	VARS1	1050.8	647.177	1319.88	1.02693	1.126e-48	1.32177e-47	665.676	628.678	1302.24	1315.74	1341.66
ENSG00000071246.11	VASH1	249.644	103.392	347.145	1.74027	7.08312e-31	5.45763e-30	109.457	97.3267	363.462	350.127	327.847
ENSG00000172974.11	VDAC2P5	75.0652	39.1751	98.9919	1.33412	7.50028e-05	0.000175052	40.2086	38.1415	73.8586	141.894	81.2233
ENSG00000197415.12	VEPH1	446.895	195.353	614.59	1.65319	7.28359e-50	8.79651e-49	192.108	198.599	638.489	614.566	590.715
ENSG00000128564.7	VGF	5.45758	0	9.09596	5.34596	0.00159789	0.00316089	0	0	10.6901	9.21388	7.38394
ENSG00000229124.7	VIM-AS1	10.7177	3.74736	15.3646	2.05792	0.0161734	0.0273319	2.23381	5.2609	21.3801	12.8994	11.8143
ENSG00000164944.12	VIRMA	1029.09	591.384	1320.89	1.16003	3.64054e-58	5.082e-57	583.025	599.743	1357.64	1286.26	1318.77
ENSG00000236404.10	VLDLR-AS1	65.6606	38.6166	83.6899	1.11602	4.1837e-05	0.000100397	39.0917	38.1415	87.4642	76.4752	87.1305
ENSG00000187650.4	VMAC	87.5178	31.5812	124.809	1.9684	9.51198e-13	3.89916e-12	36.8579	26.3045	140.915	108.724	124.789
ENSG00000069329.18	VPS35	2131.93	1274.42	2703.61	1.08428	1.01029e-76	1.90212e-75	1274.39	1274.45	2700.7	2806.55	2603.58
ENSG00000141252.21	VPS53	870.875	365.295	1207.93	1.72337	2.86039e-98	6.97981e-97	374.164	356.426	1226.44	1188.59	1208.75
ENSG00000186806.5	VSIG10L	45.3233	9.53021	69.1853	2.84103	2.23618e-10	8.02444e-10	11.1691	7.89135	80.6614	62.6544	64.2402
ENSG00000132471.12	WBP2	1243.44	673.273	1623.56	1.26992	3.64561e-61	5.37476e-60	690.248	656.297	1513.13	1654.81	1702.74
ENSG00000143951.16	WDPCP	227.85	70.3335	332.861	2.24977	3.22148e-38	2.99801e-37	67.0144	73.6526	317.787	319.722	361.075
ENSG00000127580.17	WDR24	231.117	142.765	290.018	1.0221	4.88942e-13	2.03223e-12	147.432	138.099	289.604	275.495	304.957
ENSG00000134987.12	WDR36	721.204	394.606	938.936	1.24576	1.5274e-46	1.71253e-45	414.372	374.839	969.881	941.658	905.271
ENSG00000160193.12	WDR4	86.8931	53.8044	108.952	1.0297	1.3402e-05	3.37609e-05	45.7932	61.8156	108.844	105.038	112.974
ENSG00000163811.12	WDR43	651.57	368.061	840.576	1.19334	5.07154e-39	4.82108e-38	365.229	370.894	789.121	867.947	864.659
ENSG00000196981.4	WDR5B	205.176	111.805	267.423	1.25131	8.40926e-16	3.95572e-15	118.392	105.218	284.744	263.517	254.007
ENSG00000091157.14	WDR7	405.516	229.998	522.528	1.18759	1.02505e-27	7.21634e-27	216.68	243.317	524.785	528.877	513.922
ENSG00000133316.16	WDR74	281.291	162.41	360.545	1.1391	2.35597e-14	1.03857e-13	185.407	139.414	381.927	377.769	321.94
ENSG00000167716.19	WDR81	598.181	206.857	859.063	2.05566	1.95006e-90	4.34765e-89	203.277	210.436	870.754	843.991	862.444
ENSG00000161996.19	WDR90	339.633	113.517	490.377	2.10881	5.51999e-44	5.84237e-43	113.924	113.109	556.855	446.873	467.403
ENSG00000179698.14	WDR97	14.6743	5.06258	21.0822	2.09091	0.00838109	0.0148315	2.23381	7.89135	32.0702	11.978	19.1982
ENSG00000196151.11	WDSUB1	111.445	63.4599	143.435	1.16833	3.89664e-08	1.20781e-07	70.3651	56.5547	134.112	156.636	139.556
ENSG00000228775.8	WEE2-AS1	19.2008	8.15233	26.5665	1.73821	0.00438065	0.00811551	4.46763	11.837	29.1547	20.2705	30.2741
ENSG00000156232.7	WHAMM	271.623	160.322	345.823	1.11525	6.10323e-17	3.01946e-16	149.666	170.979	349.857	328.014	359.598
ENSG00000095397.16	WHRN	37.7647	14.7911	53.0804	1.86444	6.48306e-06	1.68379e-05	11.1691	18.4132	55.394	46.9908	56.8563
ENSG00000122574.11	WIPF3	9.4478	0.657613	15.3079	4.64892	0.0028872	0.00549461	0	1.31523	14.5774	20.2705	11.0759
ENSG00000060237.19	WNK1	2104.71	1215.73	2697.37	1.1497	1.10303e-67	1.81245e-66	1209.61	1221.84	2859.11	2535.66	2697.35
ENSG00000165392.11	WRN	420.06	156.429	595.815	1.91686	2.49987e-48	2.91463e-47	178.705	134.153	626.827	609.037	551.58
ENSG00000101966.13	XIAP	949.417	471.578	1267.98	1.42571	1.55718e-68	2.58058e-67	488.088	455.068	1277.95	1204.25	1321.72
ENSG00000171044.11	XKR6	26.6267	15.8089	33.8386	1.10216	0.012563	0.021622	14.5198	17.0979	34.0138	35.0127	32.4893
ENSG00000221947.8	XKR9	14.8445	4.7651	21.5641	2.16518	0.00219096	0.00424468	5.58453	3.94568	24.2956	17.5064	22.8902
ENSG00000196236.13	XPNPEP3	293.725	127.812	404.333	1.66092	4.31339e-34	3.65824e-33	130.678	124.946	381.927	418.31	412.762
ENSG00000130227.17	XPO7	1138.49	630.794	1476.95	1.22978	9.40917e-70	1.59513e-68	613.182	648.406	1443.16	1495.41	1492.29
ENSG00000093217.11	XYLB	31.6024	14.4936	43.0083	1.5686	0.000217774	0.000483024	14.5198	14.4675	41.7884	45.148	42.0884
ENSG00000241127.8	YAE1	170.552	90.7457	223.757	1.31045	1.3525e-14	6.0308e-14	81.5342	99.9571	218.66	226.661	225.948
ENSG00000174851.16	YIF1A	1495.09	699.562	2025.44	1.53781	2.96507e-107	7.85363e-106	653.39	745.733	1983.49	2074.04	2018.77
ENSG00000130733.11	YIPF2	983.304	538.326	1279.96	1.24763	3.76223e-63	5.78331e-62	558.453	518.199	1275.03	1258.62	1306.22
ENSG00000145817.17	YIPF5	2054.01	1217.91	2611.42	1.09898	8.57055e-91	1.92465e-89	1244.23	1191.59	2616.15	2620.43	2597.67
ENSG00000106636.9	YKT6	2256.58	1364.07	2851.58	1.06354	1.93824e-81	3.87024e-80	1390.55	1337.58	2764.84	2871.04	2918.87
ENSG00000136758.19	YME1L1	3175.25	1829.91	4072.15	1.15395	2.14746e-132	7.23367e-131	1839.55	1820.27	4047.65	4063.32	4105.47
ENSG00000166793.13	YPEL4	83.5649	33.0583	117.236	1.80175	1.08421e-10	3.95011e-10	42.4425	23.6741	126.337	119.78	105.59
ENSG00000196449.4	YRDC	236.603	145.108	297.599	1.04272	6.18044e-13	2.56059e-12	128.444	161.773	312.927	291.159	288.712
ENSG00000234405.2	Z69733.1	24.3385	2.53129	38.8766	3.99496	8.95572e-07	2.51256e-06	1.11691	3.94568	44.7039	38.6983	33.2277
ENSG00000272104.1	Z84492.1	9.57375	3.08974	13.8964	2.19002	0.0134258	0.0230151	2.23381	3.94568	14.5774	13.8208	13.2911
ENSG00000261188.1	Z95115.1	22.0898	4.86426	33.5736	2.79024	1.51841e-05	3.80339e-05	4.46763	5.2609	33.042	39.6197	28.059
ENSG00000132846.6	ZBED3	96.1244	58.1363	121.45	1.05559	1.71962e-06	4.70767e-06	63.6637	52.609	124.393	118.859	121.097
ENSG00000250802.7	ZBED3-AS1	12.3431	3.44988	18.2719	2.35517	0.0042978	0.0079668	5.58453	1.31523	22.352	14.7422	17.7214
ENSG00000221886.4	ZBED8	116.589	58.272	155.467	1.42037	6.94751e-12	2.71163e-11	54.7284	61.8156	154.52	157.557	154.324
ENSG00000066422.5	ZBTB11	564.011	293.881	744.098	1.34104	1.23327e-44	1.32521e-43	297.097	290.665	725.953	732.503	773.837
ENSG00000204366.4	ZBTB12	55.2175	31.6177	70.9507	1.17549	0.000102631	0.000235973	29.0396	34.1959	65.1122	70.9469	76.7929
ENSG00000181722.17	ZBTB20	144.267	70.9808	193.125	1.43882	0.000473222	0.00100557	89.3525	52.609	241.984	137.287	200.105
ENSG00000173276.14	ZBTB21	476.938	292.007	600.225	1.03897	3.3664e-26	2.26793e-25	295.98	288.034	606.418	585.081	609.175
ENSG00000112365.5	ZBTB24	179.674	101.816	231.58	1.18249	3.89493e-13	1.62586e-12	104.989	98.6419	223.52	246.011	225.21
ENSG00000089775.12	ZBTB25	170.939	106.356	213.994	1.01476	6.4823e-10	2.26479e-09	98.2878	114.425	205.055	222.054	214.873
ENSG00000184677.18	ZBTB40	475.949	267.848	614.683	1.19573	8.07856e-31	6.20611e-30	279.227	256.469	635.573	582.317	626.158
ENSG00000177888.8	ZBTB41	563.109	278.036	753.159	1.43367	2.40566e-49	2.85419e-48	290.396	265.675	778.431	735.267	745.778
ENSG00000168826.16	ZBTB49	39.6141	23.7629	50.1815	1.08316	0.00243703	0.00468509	21.2212	26.3045	51.5067	52.5191	46.5188
ENSG00000119703.15	ZC2HC1C	13.3015	3.74736	19.6708	2.42855	0.00230063	0.00444215	2.23381	5.2609	21.3801	14.7422	22.8902
ENSG00000149289.11	ZC3H12C	257.836	143.423	334.112	1.2158	5.21017e-19	2.8061e-18	147.432	139.414	348.885	334.464	318.986
ENSG00000188177.14	ZC3H6	150.541	91.2311	190.08	1.05471	2.14252e-09	7.25172e-09	98.2878	84.1744	179.787	196.256	194.198
ENSG00000140948.13	ZCCHC14	452.836	268.056	576.022	1.10385	6.43676e-23	3.94064e-22	254.655	281.458	616.137	583.238	528.69
ENSG00000121766.16	ZCCHC17	640.802	319.998	854.671	1.4243	2.83583e-39	2.70908e-38	276.993	363.002	834.797	906.646	822.571
ENSG00000168228.15	ZCCHC4	120.222	64.1279	157.617	1.31674	8.22759e-09	2.67829e-08	48.027	80.2287	146.745	151.108	174.999
ENSG00000147905.18	ZCCHC7	627.259	298.025	846.749	1.50687	9.79761e-61	1.43356e-59	294.863	301.187	841.6	864.262	834.385
ENSG00000206559.8	ZCWPW2	34.0128	13.7734	47.5057	1.81673	4.88328e-05	0.000116231	7.81835	19.7284	49.563	47.9122	45.042
ENSG00000204186.10	ZDBF2	369.719	220.233	469.375	1.09197	9.68308e-20	5.34328e-19	215.563	224.904	511.18	433.974	462.973
ENSG00000104219.13	ZDHHC2	417.834	242.483	534.734	1.13849	6.87823e-22	4.06632e-21	239.018	245.947	567.545	557.44	479.217
ENSG00000174165.8	ZDHHC24	304.81	183.031	385.996	1.08212	3.43879e-17	1.71442e-16	175.354	190.708	379.983	363.027	414.977
ENSG00000104231.11	ZFAND1	248.292	137.676	322.035	1.23034	3.85064e-19	2.08621e-18	130.678	144.675	321.674	318.8	325.632
ENSG00000128016.7	ZFP36	715.999	429.324	907.115	1.08146	3.98943e-34	3.38719e-33	423.308	435.34	844.515	943.501	933.33
ENSG00000136866.14	ZFP37	50.4746	24.5823	67.7361	1.4521	1.1384e-05	2.88509e-05	26.8058	22.3588	68.0277	74.6324	60.5483
ENSG00000181638.20	ZFP41	222.023	125.876	286.121	1.19088	1.87796e-13	7.96361e-13	122.86	128.892	262.393	268.124	327.847
ENSG00000187801.15	ZFP69B	77.279	26.8161	110.921	2.03081	3.37888e-12	1.34074e-11	31.2734	22.3588	116.619	117.938	98.2064
ENSG00000162300.13	ZFPL1	433.454	266.433	544.801	1.02822	2.10617e-23	1.31065e-22	280.344	252.523	547.137	540.855	546.411
ENSG00000251003.9	ZFPM2-AS1	183.946	38.6166	280.832	2.86258	2.46473e-40	2.40649e-39	39.0917	38.1415	263.364	291.159	287.974
ENSG00000072121.17	ZFYVE26	431.766	266.778	541.759	1.02511	4.54147e-21	2.62477e-20	246.836	286.719	567.545	540.855	516.876
ENSG00000166432.15	ZMAT1	92.489	52.5518	119.114	1.17349	5.24486e-05	0.00012436	52.4946	52.609	157.436	114.252	85.6537
ENSG00000224596.8	ZMIZ1-AS1	15.4261	7.75569	20.5397	1.3936	0.0248163	0.0405279	8.93525	6.57613	18.4647	23.9561	19.1982
ENSG00000163867.17	ZMYM6	370.43	205.28	480.529	1.22728	4.79407e-25	3.11856e-24	198.809	211.751	478.138	512.292	451.159
ENSG00000004838.14	ZMYND10	11.5284	2.23381	17.7249	2.91052	0.00415164	0.00770784	4.46763	0	26.2393	9.21388	17.7214
ENSG00000256223.6	ZNF10	144.308	71.4766	192.863	1.41933	3.14728e-13	1.3216e-12	83.768	59.1851	202.139	181.513	194.936
ENSG00000172262.11	ZNF131	364.763	200.614	474.196	1.24346	4.15986e-26	2.7964e-25	192.108	209.121	459.673	502.156	460.758
ENSG00000196387.10	ZNF140	298.712	119.895	417.924	1.80187	4.61724e-36	4.09995e-35	116.158	123.631	412.053	453.323	388.395
ENSG00000131127.14	ZNF141	67.8368	34.149	90.2953	1.41004	4.25977e-07	1.22277e-06	30.1565	38.1415	89.4078	95.8243	85.6537
ENSG00000197841.15	ZNF181	207.046	125.615	261.334	1.06313	1.17073e-12	4.77882e-12	118.392	132.838	251.702	259.831	272.467
ENSG00000166261.11	ZNF202	154.212	67.964	211.711	1.6373	6.66735e-18	3.41635e-17	71.482	64.446	214.773	194.413	225.948
ENSG00000278318.5	ZNF229	273.479	141.387	361.539	1.35598	2.31546e-22	1.39062e-21	140.73	142.044	331.392	386.983	366.243
ENSG00000172466.16	ZNF24	1187.34	704.097	1509.5	1.0991	4.02515e-53	5.15878e-52	728.223	679.971	1517.99	1446.58	1563.92
ENSG00000171606.18	ZNF274	433.927	226.502	572.211	1.33137	5.40838e-28	3.84064e-27	241.252	211.751	551.996	632.993	531.643
ENSG00000063587.15	ZNF275	411.074	248.427	519.505	1.06383	6.34754e-22	3.75685e-21	253.538	243.317	537.419	482.807	538.289
ENSG00000056277.16	ZNF280C	30.4003	17.6825	38.8788	1.14168	0.00663557	0.0119389	15.6367	19.7284	44.7039	35.0127	36.9197
ENSG00000130844.19	ZNF331	275.87	106.815	388.572	1.86926	1.45041e-38	1.36206e-37	100.522	113.109	383.871	382.376	399.471
ENSG00000189180.16	ZNF33A	411.888	214.116	543.736	1.34119	1.8273e-33	1.51493e-32	217.797	210.436	564.63	548.226	518.352
ENSG00000197937.13	ZNF347	225.015	88.6007	315.958	1.82382	6.32669e-26	4.23648e-25	98.2878	78.9135	309.04	353.813	285.02
ENSG00000126746.17	ZNF384	507.896	288.683	654.037	1.17821	1.07446e-27	7.56075e-27	303.799	273.567	667.643	598.902	695.567
ENSG00000197024.9	ZNF398	282.654	168.861	358.516	1.08578	1.55722e-17	7.88275e-17	172.004	165.718	362.49	344.599	368.458
ENSG00000176222.9	ZNF404	117.737	71.5861	148.504	1.06283	2.06214e-07	6.06085e-07	60.313	82.8592	153.548	146.501	145.464
ENSG00000173480.11	ZNF417	242.477	93.8251	341.578	1.85291	6.28659e-33	5.12688e-32	106.106	81.544	343.054	342.756	338.923
ENSG00000256087.7	ZNF432	152.553	87.8804	195.669	1.14687	1.85603e-09	6.31237e-09	91.5864	84.1744	219.632	199.02	168.354
ENSG00000173275.13	ZNF449	182.913	111.048	230.823	1.04792	7.17679e-11	2.64206e-10	119.509	102.588	233.238	241.404	217.826
ENSG00000197714.9	ZNF460	25.5718	11.1429	35.1911	1.67134	0.0016448	0.00324707	7.81835	14.4675	37.9011	43.3052	24.367
ENSG00000196263.8	ZNF471	119.917	60.6415	159.434	1.40151	5.19719e-10	1.82982e-09	50.2608	71.0222	174.928	166.771	136.603
ENSG00000174586.11	ZNF497	89.3247	27.7712	130.36	2.22827	9.68489e-16	4.54199e-15	27.9227	27.6197	145.774	119.78	125.527
ENSG00000198795.11	ZNF521	17.8325	5.98117	25.7334	2.0984	0.000936118	0.00191204	6.70144	5.2609	27.2111	21.1919	28.7974
ENSG00000171443.7	ZNF524	94.9688	47.8859	126.357	1.40406	1.03103e-09	3.55571e-09	45.7932	49.9786	127.309	122.545	129.219
ENSG00000167625.11	ZNF526	404.909	114.994	598.186	2.37588	2.44247e-73	4.37526e-72	119.509	110.479	609.334	576.789	608.436
ENSG00000189164.15	ZNF527	91.6812	53.2094	117.329	1.14194	1.70835e-06	4.68013e-06	52.4946	53.9242	103.013	134.523	114.451
ENSG00000186020.13	ZNF529	154.262	83.8355	201.212	1.25449	1.99582e-12	8.03045e-12	92.7033	74.9678	198.252	208.234	197.151
ENSG00000233527.9	ZNF529-AS1	39.4017	24.5196	49.3231	1.0125	0.00728723	0.0130132	20.1043	28.935	55.394	53.4405	39.1349
ENSG00000183647.10	ZNF530	27.565	15.9707	35.2945	1.13271	0.0128828	0.0221381	20.1043	11.837	29.1547	36.8555	39.8733
ENSG00000251369.9	ZNF550	270.914	105.203	381.388	1.85877	1.38691e-36	1.2487e-35	103.872	106.533	402.335	359.341	382.488
ENSG00000130544.12	ZNF557	99.3433	60.7668	125.061	1.0349	5.18048e-05	0.000122908	63.6637	57.8699	159.379	101.353	114.451
ENSG00000198028.4	ZNF560	18.1442	7.65653	25.136	1.69018	0.0068665	0.0123244	10.0522	5.2609	21.3801	34.0913	19.9366
ENSG00000196357.12	ZNF565	48.8573	26.6543	63.6594	1.2605	0.000181524	0.000405817	25.6889	27.6197	69.9713	51.5977	69.409
ENSG00000186017.14	ZNF566	169.988	102.473	214.998	1.07074	1.57986e-10	5.71427e-10	104.989	99.9571	202.139	210.998	231.856
ENSG00000198453.13	ZNF568	175.66	101.852	224.866	1.14909	4.29746e-12	1.69611e-11	97.1709	106.533	214.773	218.369	241.455
ENSG00000171970.13	ZNF57	26.7653	16.0698	33.8957	1.07619	0.0246074	0.0402206	18.9874	13.1523	26.2393	30.4058	45.042
ENSG00000189144.15	ZNF573	19.2437	7.59387	27.0103	1.86843	0.00246702	0.00473921	3.35072	11.837	30.1266	25.7989	25.1054
ENSG00000161551.14	ZNF577	152.39	73.3868	205.059	1.47475	6.43247e-15	2.91095e-14	77.0666	69.7069	218.66	211.919	184.598
ENSG00000258405.11	ZNF578	53.3269	26.456	71.2408	1.4231	7.79694e-06	2.00954e-05	27.9227	24.9893	68.0277	79.2393	66.4554
ENSG00000018869.17	ZNF582	52.1908	31.4821	65.9966	1.0542	0.000752536	0.0015591	37.9748	24.9893	63.1686	69.1041	65.717
ENSG00000198466.12	ZNF587	498.343	180.787	710.048	1.96695	2.58507e-70	4.42115e-69	193.225	168.349	713.319	724.211	692.613
ENSG00000167962.14	ZNF598	783.046	315.608	1094.67	1.79675	1.5247e-90	3.40912e-89	311.617	319.6	1066.09	1077.1	1140.82
ENSG00000196458.11	ZNF605	589.123	305.916	777.927	1.34899	1.74823e-47	1.99476e-46	294.863	316.969	795.924	761.066	776.79
ENSG00000204611.7	ZNF616	202.074	122.327	255.239	1.06214	1.26257e-12	5.14559e-12	118.392	126.262	262.393	255.224	248.1
ENSG00000167395.10	ZNF646	346.241	211.549	436.037	1.04282	2.15378e-16	1.03868e-15	224.498	198.599	422.744	405.411	479.956
ENSG00000274349.4	ZNF658	98.4731	54.4881	127.796	1.22057	2.1847e-07	6.40892e-07	60.313	48.6633	118.563	147.422	117.405
ENSG00000179195.16	ZNF664	1793.56	1113.7	2246.79	1.01183	2.19297e-70	3.7547e-69	1129.19	1098.21	2272.13	2202.12	2266.13
ENSG00000166770.11	ZNF667-AS1	128.676	67.6039	169.391	1.32506	2.40396e-11	9.11859e-11	68.1313	67.0765	156.464	183.356	168.354
ENSG00000230844.3	ZNF674-AS1	49.9737	21.0959	69.2256	1.68735	2.71114e-06	7.29451e-06	29.0396	13.1523	65.1122	74.6324	67.9322
ENSG00000185730.8	ZNF696	135.144	59.3524	185.671	1.64164	1.89913e-15	8.78682e-15	64.7806	53.9242	166.182	190.727	200.105
ENSG00000143067.5	ZNF697	312.749	180.688	400.79	1.14403	2.5057e-20	1.4098e-19	194.342	167.034	408.166	388.826	405.378
ENSG00000187792.5	ZNF70	189.526	96.1945	251.747	1.38315	1.82544e-14	8.09303e-14	101.639	90.7505	287.66	216.526	251.054
ENSG00000227124.11	ZNF717	59.5392	37.0039	74.5627	1.0068	0.000709767	0.00147424	42.4425	31.5654	64.1404	74.6324	84.9153
ENSG00000186230.7	ZNF749	45.5722	28.0687	57.2412	1.03503	0.00218575	0.00423511	24.5719	31.5654	65.1122	49.7549	56.8563
ENSG00000198146.4	ZNF770	1047.11	527.507	1393.51	1.3973	1.71672e-76	3.21264e-75	561.804	493.209	1383.88	1392.22	1404.42
ENSG00000197162.10	ZNF785	179.54	81.5652	244.856	1.57262	5.29308e-19	2.84977e-18	96.054	67.0765	241.012	246.932	246.623
ENSG00000142409.6	ZNF787	251.295	152.107	317.42	1.06831	5.32227e-15	2.41631e-14	138.496	165.718	317.787	313.272	321.201
ENSG00000267254.7	ZNF790-AS1	48.9017	23.1053	66.0994	1.51831	7.58269e-06	1.95725e-05	21.2212	24.9893	72.8868	66.3399	59.0715
ENSG00000173875.14	ZNF791	445.569	266.011	565.275	1.08553	1.12195e-26	7.64828e-26	270.291	261.73	576.292	562.047	557.487
ENSG00000278129.2	ZNF8	104.967	63.8565	132.374	1.0524	6.99473e-07	1.9742e-06	65.8975	61.8156	130.224	124.387	142.51
ENSG00000204524.7	ZNF805	146.471	59.2533	204.616	1.78212	6.70897e-19	3.5921e-18	65.8975	52.609	195.337	196.256	222.256
ENSG00000197779.15	ZNF81	182.801	111.346	230.437	1.04463	8.41578e-10	2.91924e-09	116.158	106.533	260.449	206.391	224.472
ENSG00000185869.15	ZNF829	96.7106	51.0383	127.159	1.31021	6.52035e-09	2.13645e-08	54.7284	47.3481	131.196	126.23	124.05
ENSG00000198040.11	ZNF84	458.38	203.37	628.387	1.62567	2.63812e-50	3.2086e-49	205.511	201.229	654.038	614.566	616.559
ENSG00000197608.11	ZNF841	237.713	133	307.522	1.20153	6.6982e-17	3.30327e-16	146.315	119.685	317.787	297.608	307.172
ENSG00000234284.7	ZNF879	65.0122	27.3746	90.104	1.70921	3.00129e-08	9.38738e-08	32.3903	22.3588	88.436	79.2393	102.637
ENSG00000213793.5	ZNF888	48.7599	30.005	61.2632	1.01796	0.00213831	0.00414942	32.3903	27.6197	67.0559	67.2613	49.4724
ENSG00000214029.6	ZNF891	58.9736	27.2127	80.1475	1.56112	2.78441e-07	8.09002e-07	26.8058	27.6197	81.6332	74.6324	84.1769
ENSG00000173465.8	ZNRD2	358.011	194.712	466.878	1.25245	5.9168e-20	3.29195e-19	228.966	160.457	437.321	485.571	477.741
ENSG00000132485.14	ZRANB2	1291.3	773.695	1636.37	1.08089	2.62606e-47	2.98758e-46	751.678	795.711	1750.26	1587.55	1571.3
ENSG00000121988.18	ZRANB3	94.567	56.9568	119.641	1.07355	1.56737e-06	4.3084e-06	54.7284	59.1851	126.337	111.488	121.097
ENSG00000196812.5	ZSCAN16	15.7209	6.53962	21.8417	1.72189	0.0075725	0.0134791	7.81835	5.2609	26.2393	19.3491	19.9366
ENSG00000214655.11	ZSWIM8	1615.77	875.609	2109.2	1.27002	2.18549e-92	5.0021e-91	855.551	895.668	2141.9	2047.32	2138.39
ENSG00000086827.9	ZW10	298.206	140.928	403.058	1.51645	8.40937e-30	6.31008e-29	138.496	143.36	390.673	429.367	389.133
ENSG00000198455.5	ZXDB	223.081	139.216	278.991	1.00165	1.7207e-12	6.95233e-12	142.964	135.468	267.252	288.394	281.328
ENSG00000070476.15	ZXDC	268.365	142.504	352.273	1.30552	1.45326e-22	8.78933e-22	142.964	142.044	343.054	363.027	350.737
ENSG00000074755.15	ZZEF1	865.445	458.995	1136.41	1.30542	6.86924e-59	9.70273e-58	466.867	451.122	1186.6	1123.17	1099.47

## Sheet: Down>2 FDR<0.05
ENSEMBL_ID	GENE	baseMean	baseMean_control	baseMean_Nanch	log2FoldChange	pvalue	padj	control1	control2	Nanch1	Nanch2	Nanch3
ENSG00000000971.16	CFH	1916.1	3745.26	696.671	-2.42643	0	0	3790.78	3699.73	717.206	666.163	706.643
ENSG00000002834.18	LASP1	6688.03	12704.8	2676.84	-2.2457	0	0	12654.6	12755.1	2589.91	2684.92	2755.69
ENSG00000005884.18	ITGA3	3965.55	8428.38	990.331	-3.08717	0	0	8543.22	8313.54	978.627	956.4	1035.97
ENSG00000011465.18	DCN	20998.4	41293.2	7468.56	-2.46705	0	0	43416.4	39170	7489.85	7373.87	7541.95
ENSG00000013016.16	EHD3	1555.22	3262.45	417.077	-2.96626	0	0	3414.38	3110.51	404.279	416.467	430.484
ENSG00000022267.19	FHL1	4790.1	10489	990.861	-3.40339	0	0	10554.8	10423.2	1013.61	948.108	1010.86
ENSG00000035403.18	VCL	5182.92	9805.29	2101.34	-2.22162	0	0	9959.46	9651.12	2119.55	2018.76	2165.71
ENSG00000049540.18	ELN	2685.81	6626.99	58.3668	-6.81669	0	0	6471.36	6782.62	55.394	56.2047	63.5019
ENSG00000064666.15	CNN2	1698.87	3727.11	346.713	-3.42072	0	0	3713.71	3740.5	315.843	356.577	367.72
ENSG00000065534.19	MYLK	1734.16	3850.95	322.963	-3.57467	0	0	3889.07	3812.84	343.054	292.08	333.754
ENSG00000067113.17	PLPP1	1395.87	2842.93	431.169	-2.71897	0	0	2821.31	2864.56	398.448	457.93	437.129
ENSG00000067225.19	PKM	9469.4	16131.5	5027.98	-1.68209	0	0	16596.1	15667	4971.85	5103.57	5008.52
ENSG00000071127.17	WDR1	4660.79	8853.88	1865.39	-2.24545	0	0	8839.2	8868.56	1750.26	1916.49	1929.42
ENSG00000072952.19	IRAG1	2370.34	5383.51	361.552	-3.88866	0	0	5470.61	5296.41	344.998	333.542	406.117
ENSG00000074181.9	NOTCH3	5077.61	11148.6	1030.27	-3.43366	0	0	10516.8	11780.5	1023.33	973.907	1093.56
ENSG00000074410.14	CA12	809.693	1872.75	100.99	-4.1979	0	0	1779.23	1966.26	92.3233	93.9816	116.666
ENSG00000074527.13	NTN4	8881.51	15416.2	4525.06	-1.76792	0	0	15705.9	15126.4	4441.24	4439.25	4694.71
ENSG00000075624.17	ACTB	31365.7	71336.9	4718.29	-3.918	0	0	74816	67857.7	4587.98	4723.03	4843.86
ENSG00000077943.8	ITGA8	1324.15	3157.84	101.687	-4.94556	0	0	3163.08	3152.59	97.1824	94.9029	112.974
ENSG00000078098.14	FAP	1097.9	2260.02	323.15	-2.8051	0	0	2194.72	2325.32	318.758	328.014	322.678
ENSG00000082781.12	ITGB5	2807.62	5465.49	1035.7	-2.39945	0	0	5376.79	5554.2	995.148	1086.32	1025.63
ENSG00000083444.17	PLOD1	4161.34	8312.49	1393.91	-2.57503	0	0	8093.11	8531.87	1325.57	1446.58	1409.59
ENSG00000087116.16	ADAMTS2	3543.84	7404.16	970.3	-2.93129	0	0	7102.41	7705.9	987.373	948.108	975.418
ENSG00000087303.18	NID2	4331.89	8783.21	1364.33	-2.68589	0	0	8924.08	8642.34	1405.26	1278.89	1408.86
ENSG00000091136.15	LAMB1	5683.09	11560.9	1764.54	-2.71086	0	0	11613.6	11508.2	1772.61	1700.88	1820.14
ENSG00000091986.16	CCDC80	18548.3	43231.1	2093.1	-4.36648	0	0	43091.4	43370.9	2016.54	2007.7	2255.05
ENSG00000092841.19	MYL6	9365.01	18273.6	3425.92	-2.41567	0	0	18793.1	17754.2	3312.95	3656.07	3308.74
ENSG00000100600.15	LGMN	1407.5	2850.4	445.564	-2.67597	0	0	2892.79	2808.01	416.913	467.144	452.635
ENSG00000101335.10	MYL9	11746.9	23931.5	3623.88	-2.72308	0	0	24048.1	23814.8	3518	3717.8	3635.85
ENSG00000101384.12	JAG1	3534.74	6554.15	1521.79	-2.10677	0	0	6617.67	6490.64	1502.44	1543.32	1519.61
ENSG00000102024.18	PLS3	6670.17	11881.9	3195.71	-1.89537	0	0	12005.6	11758.1	3238.12	3224.86	3124.14
ENSG00000102265.12	TIMP1	18261.9	33387.7	8177.96	-2.02905	0	0	33346.4	33429.1	7761.96	8242.73	8529.19
ENSG00000105974.13	CAV1	3689.21	7031.7	1460.88	-2.26631	0	0	7275.53	6787.88	1457.74	1409.72	1515.18
ENSG00000106211.10	HSPB1	2659.34	5334.74	875.746	-2.60405	0	0	5353.33	5316.14	842.572	866.104	918.562
ENSG00000106366.9	SERPINE1	22020.5	51538.2	2342.08	-4.45866	0	0	48941.7	54134.7	2220.62	2346.77	2458.85
ENSG00000106624.11	AEBP1	5822.95	10321.5	2823.91	-1.86895	0	0	10218.6	10424.5	2836.75	2700.59	2934.38
ENSG00000107796.13	ACTA2	26390.6	65602.9	249.092	-8.04749	0	0	66093	65112.9	255.59	259.831	231.856
ENSG00000108821.14	COL1A1	193066	388554	62741.3	-2.63057	0	0	381240	395867	61851.8	60811.6	65560.5
ENSG00000111057.11	KRT18	15567.4	35918.8	1999.73	-4.16568	0	0	35287.6	36550.1	1924.21	2025.21	2049.78
ENSG00000111341.10	MGP	2104.64	4991.76	179.893	-4.7839	0	0	5209.25	4774.27	162.295	175.064	202.32
ENSG00000112902.12	SEMA5A	2890.92	6406.69	547.075	-3.54952	0	0	6389.82	6423.56	547.137	545.462	548.626
ENSG00000113140.11	SPARC	66410.4	121033	29995.2	-2.01247	0	0	117304	124762	28883.6	29999.5	31102.6
ENSG00000114019.15	AMOTL2	2029.28	3883.01	793.468	-2.29258	0	0	3824.29	3941.73	810.501	803.45	766.453
ENSG00000115380.20	EFEMP1	6368	14991	619.36	-4.5945	0	0	14762.2	15219.8	586.01	634.836	637.234
ENSG00000115641.19	FHL2	2884.9	5606.59	1070.44	-2.38817	0	0	5639.26	5573.92	1069.98	1052.22	1089.13
ENSG00000116260.17	QSOX1	9023.54	15333.4	4816.97	-1.6704	0	0	15645.6	15021.2	4755.14	4817.94	4877.83
ENSG00000117152.14	RGS4	3677.83	8411.13	522.305	-4.00719	0	0	8737.56	8084.69	517.982	503.999	544.935
ENSG00000117519.16	CNN3	2987.67	5802.87	1110.88	-2.38359	0	0	5835.84	5769.89	1072.89	1120.41	1139.34
ENSG00000118523.6	CCN2	16354.2	38560	1550.28	-4.63702	0	0	38566.8	38553.2	1575.33	1535.95	1539.55
ENSG00000119138.4	KLF9	1454.37	2892.81	495.408	-2.54374	0	0	2903.96	2881.66	494.659	479.122	512.445
ENSG00000119280.17	C1orf198	4569	9766.47	1104.01	-3.14369	0	0	9722.67	9810.26	1095.25	1086.32	1130.48
ENSG00000120708.17	TGFBI	2571.34	5625.78	535.043	-3.39126	0	0	5534.27	5717.28	518.954	531.641	554.534
ENSG00000122641.11	INHBA	2835.25	6527.14	373.99	-4.1261	0	0	6810.9	6243.37	386.786	359.341	375.842
ENSG00000122642.11	FKBP9	2538.08	4647.41	1131.86	-2.03597	0	0	4613.94	4680.89	1077.75	1156.34	1161.49
ENSG00000122786.20	CALD1	22462.2	49093.2	4708.14	-3.38209	0	0	49630.9	48555.5	4675.45	4698.16	4750.82
ENSG00000123146.20	ADGRE5	1415.57	3094.12	296.538	-3.37743	0	0	3088.25	3099.99	289.604	281.023	318.986
ENSG00000124212.6	PTGIS	1890.73	4404.78	214.692	-4.35795	0	0	4347	4462.56	209.914	219.29	214.873
ENSG00000125868.16	DSTN	7926.72	15421.9	2929.89	-2.39641	0	0	16440.9	14403	2885.35	2997.27	2907.06
ENSG00000127241.18	MASP1	2037.62	4149.34	629.806	-2.72035	0	0	4187.28	4111.39	632.658	628.386	628.373
ENSG00000129116.19	PALLD	5170.26	10205.6	1813.34	-2.49342	0	0	10531.3	9879.97	1799.82	1854.75	1785.44
ENSG00000130176.8	CNN1	1212.73	2970.3	41.0099	-6.17157	0	0	2986.61	2954	39.8448	39.6197	43.5652
ENSG00000130402.13	ACTN4	5644.17	11140.1	1980.24	-2.49052	0	0	11124.4	11155.7	1936.85	1945.97	2057.9
ENSG00000133026.13	MYH10	3575.2	7847.13	727.251	-3.4294	0	0	8023.86	7670.39	651.122	776.73	753.9
ENSG00000133030.22	MPRIP	4339.73	8799.23	1366.73	-2.68536	0	0	8351.11	9247.35	1390.68	1288.1	1421.41
ENSG00000133110.15	POSTN	5936.07	13672.8	778.246	-4.13321	0	0	13135.9	14209.7	735.671	805.293	793.773
ENSG00000133816.17	MICAL2	4852.05	10445.1	1123.36	-3.21416	0	0	10493.3	10396.9	1096.22	1076.18	1197.67
ENSG00000134333.14	LDHA	7986.59	17249.9	1811.06	-3.2503	0	0	17154.6	17345.2	1729.85	1841.85	1861.49
ENSG00000134986.14	NREP	2242.46	5322.84	188.877	-4.81326	0	0	5124.37	5521.32	195.337	174.142	197.151
ENSG00000135074.16	ADAM19	1062.26	2292.73	241.942	-3.24268	0	0	2211.48	2373.98	253.646	224.819	247.362
ENSG00000135424.18	ITGA7	1582.22	3785.75	113.193	-5.05029	0	0	3749.46	3822.04	104.957	106.881	127.742
ENSG00000135862.6	LAMC1	7429.48	13018.6	3703.37	-1.81315	0	0	12823.2	13214.1	3771.65	3537.21	3801.25
ENSG00000135919.14	SERPINE2	4125.51	8427.7	1257.38	-2.74327	0	0	8447.17	8408.23	1238.1	1241.11	1292.93
ENSG00000136378.15	ADAMTS7	2116.35	4689.55	400.884	-3.55256	0	0	4724.52	4654.58	428.574	391.59	382.488
ENSG00000137507.11	LRRC32	2847.75	6470.39	432.662	-3.89755	0	0	6450.14	6490.64	413.025	425.681	459.281
ENSG00000137573.14	SULF1	7023.46	15964.8	1062.58	-3.90583	0	0	15911.5	16018.1	1017.5	1008	1162.23
ENSG00000137801.11	THBS1	47067.2	112305	3575.47	-4.97213	0	0	112889	111720	3464.55	3534.44	3727.41
ENSG00000138758.12	SEPTIN11	4136.32	7901.3	1626.33	-2.28032	0	0	8050.66	7751.94	1667.65	1554.38	1656.96
ENSG00000139278.10	GLIPR1	1197.98	2810.13	123.223	-4.51079	0	0	2946.4	2673.85	127.309	116.095	126.265
ENSG00000140416.23	TPM1	6683.67	15063.3	1097.24	-3.77709	0	0	14680.6	15446	1051.51	1107.51	1132.7
ENSG00000140545.15	MFGE8	10237.9	18214.6	4920.07	-1.88787	0	0	18331.8	18097.5	4854.26	4864.93	5041.01
ENSG00000140937.14	CDH11	4090.83	8607.79	1079.52	-2.99274	0	0	8729.74	8485.83	1049.57	1046.7	1142.3
ENSG00000141753.7	IGFBP4	8193.06	18897.5	1056.76	-4.15877	0	0	19906.6	17888.4	1037.91	1014.45	1117.93
ENSG00000142089.17	IFITM3	3400.13	6877.38	1081.97	-2.66626	0	0	7228.62	6526.15	1005.84	1080.79	1159.28
ENSG00000142871.18	CCN1	9432.75	15533.3	5365.74	-1.53334	0	0	15498.2	15568.3	5274.09	5441.72	5381.41
ENSG00000142910.16	TINAGL1	2644.6	6010.77	400.488	-3.90242	0	0	5693.99	6327.55	389.702	376.848	434.914
ENSG00000143641.10	GALNT2	2107.73	3958.27	874.044	-2.17676	0	0	3902.47	4014.07	840.628	879.925	901.579
ENSG00000144810.16	COL8A1	2287.64	4906.72	541.589	-3.18075	0	0	5093.09	4720.34	539.362	550.068	535.335
ENSG00000146122.17	DAAM2	915.538	1924.31	243.022	-2.98135	0	0	1902.09	1946.53	234.21	242.325	252.531
ENSG00000148180.21	GSN	2967.79	5927.65	994.551	-2.57278	0	0	5911.79	5943.5	973.768	966.536	1043.35
ENSG00000149591.17	TAGLN	21497.7	53289.1	303.418	-7.4599	0	0	53908.6	52669.5	301.266	318.8	290.189
ENSG00000150687.12	PRSS23	4159.52	7771.66	1751.43	-2.14807	0	0	7888.71	7654.61	1653.07	1758.93	1842.29
ENSG00000151388.11	ADAMTS12	893.029	2131.57	67.3345	-4.96716	0	0	2160.1	2103.05	68.9995	52.5191	80.4849
ENSG00000151468.11	CCDC3	3398.65	7904.37	394.839	-4.32442	0	0	8097.57	7711.17	370.265	430.288	383.965
ENSG00000152377.14	SPOCK1	2655.69	5184.27	969.975	-2.41616	0	0	5226.01	5142.53	903.797	1003.39	1002.74
ENSG00000152767.17	FARP1	1761.84	3373.46	687.422	-2.29338	0	0	3400.98	3345.93	700.685	646.814	714.765
ENSG00000154096.14	THY1	3277.19	7822.12	247.228	-4.99131	0	0	7987	7657.24	282.801	228.504	230.379
ENSG00000154122.14	ANKH	1099.19	2327.81	280.114	-3.05598	0	0	2364.49	2291.12	289.604	270.888	279.851
ENSG00000154734.16	ADAMTS1	6044.95	13541	1047.59	-3.69038	0	0	13479.9	13602.1	1027.22	1037.48	1078.05
ENSG00000156265.16	MAP3K7CL	1071.22	2514.55	108.998	-4.53584	0	0	2409.17	2619.93	104.957	125.309	96.7296
ENSG00000157613.11	CREB3L1	1122.55	2283.67	348.469	-2.70836	0	0	2320.93	2246.4	339.167	336.307	369.935
ENSG00000157766.19	ACAN	2823.02	6940.37	78.1216	-6.47803	0	0	7319.09	6561.66	85.5205	72.7896	76.0545
ENSG00000159403.18	C1R	3763.67	7184.61	1483.05	-2.27473	0	0	7323.56	7045.66	1388.74	1508.31	1552.1
ENSG00000159840.16	ZYX	2735.97	5085.89	1169.36	-2.11884	0	0	5089.74	5082.03	1162.3	1122.25	1223.52
ENSG00000162458.13	FBLIM1	1538.67	3408.28	292.269	-3.54717	0	0	3386.46	3430.11	313.899	280.102	282.805
ENSG00000162576.17	MXRA8	1557.7	3120.99	515.506	-2.59706	0	0	3067.03	3174.95	519.926	506.763	519.829
ENSG00000162591.16	MEGF6	1032.16	2226.53	235.907	-3.23571	0	0	2164.57	2288.49	235.181	230.347	242.193
ENSG00000162614.19	NEXN	1373.39	2966.84	311.086	-3.25325	0	0	3144.09	2789.59	313.899	300.372	318.986
ENSG00000163430.12	FSTL1	22345.2	48950.6	4608.22	-3.40928	0	0	49422	48479.2	4615.19	4637.34	4572.13
ENSG00000163431.13	LMOD1	1724.2	4084.24	150.844	-4.75466	0	0	4024.22	4144.27	142.858	153.872	155.801
ENSG00000163520.14	FBLN2	2802.1	5992.62	675.089	-3.14622	0	0	5698.46	6286.78	661.812	630.229	733.225
ENSG00000164176.13	EDIL3	3209.45	5997.3	1350.89	-2.14881	0	0	6105.01	5889.58	1316.82	1324.03	1411.81
ENSG00000164761.9	TNFRSF11B	2788.72	5541.6	953.463	-2.53591	0	0	5675	5408.21	896.022	923.231	1041.14
ENSG00000166033.13	HTRA1	2818.29	5131.01	1276.49	-2.00532	0	0	5144.47	5117.54	1265.32	1232.82	1331.32
ENSG00000166923.12	GREM1	23177.2	45487.5	8303.64	-2.4537	0	0	48511.7	42463.4	8415.03	8068.59	8427.29
ENSG00000167460.17	TPM4	14144	27743.8	5077.38	-2.44946	0	0	27105.1	28382.6	4963.11	5086.98	5182.05
ENSG00000168386.18	FILIP1L	1492.68	3362.73	245.979	-3.76777	0	0	3344.02	3381.44	255.59	216.526	265.822
ENSG00000168542.16	COL3A1	75120.8	170569	11488.7	-3.89177	0	0	164076	177062	11043.8	11240.9	12181.3
ENSG00000169439.12	SDC2	2147.91	4703.71	444.049	-3.40594	0	0	4668.67	4738.76	418.856	482.807	430.484
ENSG00000171992.13	SYNPO	1935.59	4422.16	277.87	-3.98633	0	0	4447.52	4396.8	279.885	252.46	301.265
ENSG00000172403.11	SYNPO2	4661.4	10651.4	668.077	-3.9915	0	0	10740.2	10562.6	679.305	599.823	725.103
ENSG00000175274.19	TP53I11	8144.11	18171.1	1459.43	-3.63567	0	0	18296	18046.2	1368.33	1443.81	1566.13
ENSG00000175899.15	A2M	2381.92	4570.51	922.858	-2.30643	0	0	4524.59	4616.44	930.036	884.532	954.005
ENSG00000177469.13	CAVIN1	10356.3	19364	4351.25	-2.15325	0	0	18511.6	20216.3	4226.46	4367.38	4459.9
ENSG00000180914.11	OXTR	1378.45	3294.75	100.923	-5.02695	0	0	3517.14	3072.37	103.013	94.9029	104.852
ENSG00000182326.15	C1S	3524.05	6504.32	1537.19	-2.07937	0	0	6586.4	6422.24	1477.17	1523.98	1610.44
ENSG00000182718.18	ANXA2	9397.65	15885	5072.75	-1.6469	0	0	15876.8	15893.2	4960.19	5239.93	5018.12
ENSG00000183087.15	GAS6	1461.38	2937.01	477.623	-2.62551	0	0	2954.22	2919.8	519.926	469.908	443.036
ENSG00000184009.13	ACTG1	17638.1	40546.2	2365.98	-4.09825	0	0	40120.4	40971.9	2318.77	2373.49	2405.69
ENSG00000184347.15	SLIT3	980.991	2067.11	256.909	-3.01321	0	0	2041.71	2092.52	263.364	268.124	239.24
ENSG00000186340.17	THBS2	20157.6	40163.8	6820.15	-2.55746	0	0	39353.1	40974.5	6624.93	6749.17	7086.36
ENSG00000187498.16	COL4A1	30123.8	67993.2	4877.6	-3.80095	0	0	61739.3	74247.1	4742.5	4942.32	4947.98
ENSG00000196923.14	PDLIM7	1435.4	3329.38	172.742	-4.26494	0	0	3304.93	3353.82	165.21	175.064	177.953
ENSG00000196924.19	FLNA	24971.4	48196.5	9487.94	-2.34442	0	0	47671.8	48721.2	9418.92	9292.2	9752.7
ENSG00000197043.14	ANXA6	2981.91	5867.64	1058.09	-2.47173	0	0	5987.74	5747.53	1045.68	1073.42	1055.16
ENSG00000198467.16	TPM2	10816.6	26021	680.406	-5.25762	0	0	24393.2	27648.7	669.587	704.862	666.769
ENSG00000198695.2	MT-ND6	1749.07	3952.72	279.973	-3.82123	0	0	4305.68	3599.77	288.632	273.652	277.636
ENSG00000198712.1	MT-CO2	7386.95	17583.4	589.347	-4.89952	0	0	19050	16116.8	610.306	568.496	589.238
ENSG00000198727.2	MT-CYB	4569.97	9938.36	991.044	-3.32614	0	0	10593.9	9282.86	996.12	975.75	1001.26
ENSG00000198786.2	MT-ND5	3934.73	8505.13	887.796	-3.26126	0	0	8886.11	8124.15	926.148	857.812	879.427
ENSG00000198804.2	MT-CO1	27203.2	65208.7	1866.25	-5.12888	0	0	66392.3	64025.2	2002.93	1887.92	1707.9
ENSG00000198886.2	MT-ND4	9391.73	21791.7	1125.07	-4.27563	0	0	22994.9	20588.5	1137.03	1101.06	1137.13
ENSG00000198899.2	MT-ATP6	5820.67	13167.2	922.949	-3.83484	0	0	14275.2	12059.3	967.937	866.104	934.806
ENSG00000198938.2	MT-CO3	6508	15348.8	614.124	-4.64142	0	0	16131.5	14566.1	595.728	607.195	639.449
ENSG00000204262.14	COL5A2	9790.59	19689.8	3191.08	-2.62455	0	0	18937.2	20442.5	3171.06	3109.68	3292.5
ENSG00000212907.2	MT-ND4L	1131.24	2640.8	124.869	-4.38761	0	0	2653.77	2627.82	111.76	118.859	143.987
ENSG00000213626.13	LBH	2747.06	6031.3	557.564	-3.43583	0	0	5944.18	6118.43	556.855	565.732	550.103
ENSG00000228253.1	MT-ATP8	1243.12	2921.13	124.444	-4.54593	0	0	3096.07	2746.19	108.844	130.837	133.649
ENSG00000241644.2	INMT	787.446	1858.78	73.2224	-4.66718	0	0	1973.57	1743.99	75.8023	70.0255	73.8394
ENSG00000248527.1	MTATP6P1	1171.87	2804.98	83.1303	-5.08666	0	0	2982.14	2627.82	87.4642	86.6104	75.3162
ENSG00000286190.2	AC055839.2	908.086	1996.92	182.195	-3.45623	0	0	2024.95	1968.89	200.196	164.007	182.383
ENSG00000063660.9	GPC1	3937.32	7171.83	1780.98	-2.0077	8.45352e-308	7.84355e-306	7023.11	7320.54	1698.75	1774.59	1869.61
ENSG00000004776.13	HSPB6	2821.51	5621.96	954.552	-2.55707	2.69129e-303	2.48223e-301	5406.95	5836.97	876.585	1030.11	956.958
ENSG00000128641.19	MYO1B	1595.06	3033.2	636.296	-2.25195	8.49605e-300	7.78972e-298	3055.86	3010.55	602.531	662.478	643.879
ENSG00000100345.22	MYH9	17845.3	33720.5	7261.79	-2.21501	1.15114e-298	1.04309e-296	31376.1	36064.8	7250.78	7186.82	7347.76
ENSG00000174807.4	CD248	2599.64	5165.55	889.031	-2.53589	5.16494e-295	4.62605e-293	4970.24	5360.86	807.586	926.916	932.591
ENSG00000166147.14	FBN1	13378.1	22087.5	7571.8	-1.54439	6.81387e-295	6.06786e-293	21574.2	22600.8	7728.92	7387.69	7598.81
ENSG00000110651.12	CD81	3598.86	6200.62	1864.35	-1.73278	1.75092e-294	1.55032e-292	6259.15	6142.1	1800.79	1880.55	1911.7
ENSG00000111640.15	GAPDH	21803.1	36351.5	12104.1	-1.58636	3.548e-293	3.12365e-291	35391.4	37311.6	11775.6	12405.6	12131.1
ENSG00000263873.1	THY1-AS1	633.59	1525.89	38.7214	-5.27564	2.80149e-291	2.43871e-289	1560.32	1491.47	28.1829	41.4624	46.5188
ENSG00000134853.12	PDGFRA	2030.31	4001.92	715.897	-2.48137	1.13426e-290	9.81867e-289	4210.74	3793.11	680.277	718.682	748.731
ENSG00000113578.18	FGF1	581.277	1354.71	65.6556	-4.37104	5.37837e-290	4.62988e-288	1362.63	1346.79	71.915	60.8116	64.2402
ENSG00000116962.15	NID1	2110.9	3868.38	939.25	-2.04273	8.85548e-289	7.58098e-287	3959.43	3777.33	968.909	902.96	945.882
ENSG00000115419.13	GLS	3193.87	5740.76	1495.94	-1.93938	2.02742e-288	1.72609e-286	5816.85	5664.68	1522.85	1414.33	1550.63
ENSG00000145244.12	CORIN	602.885	1444.51	41.7987	-5.10294	7.68245e-288	6.5049e-286	1484.37	1404.66	42.7603	36.8555	45.7804
ENSG00000026508.20	CD44	3179.63	5952.42	1331.1	-2.16015	1.36276e-285	1.1476e-283	6240.16	5664.68	1299.33	1310.21	1383.75
ENSG00000167552.15	TUBA1A	2685.12	4929.25	1189.03	-2.05083	2.158e-285	1.80747e-283	5076.34	4782.16	1128.29	1222.68	1216.13
ENSG00000143369.15	ECM1	919.788	1873.58	283.928	-2.72071	1.09442e-284	9.11723e-283	1903.21	1843.95	278.914	281.945	290.927
ENSG00000122862.5	SRGN	2433.99	4579.47	1003.67	-2.19034	4.03164e-284	3.32289e-282	4779.24	4379.7	965.993	1043.01	1002
ENSG00000067057.18	PFKP	1492.5	2844.32	591.291	-2.26521	2.4784e-282	2.03189e-280	2746.47	2942.16	594.756	586.924	592.192
ENSG00000168615.13	ADAM9	4586.6	7412.11	2702.92	-1.45514	5.75267e-281	4.69146e-279	7390.57	7433.65	2703.61	2688.61	2716.55
ENSG00000117228.11	GBP1	689.421	1665.43	38.7505	-5.43074	2.96804e-280	2.40784e-278	1795.99	1534.87	40.8166	37.7769	37.6581
ENSG00000072110.15	ACTN1	6901.8	11706	3698.99	-1.66106	5.70998e-280	4.60813e-278	11438.2	11973.8	3623.93	3642.25	3830.79
ENSG00000188783.6	PRELP	978.31	2053.47	261.54	-2.96589	6.44705e-277	5.17602e-275	2047.29	2059.64	259.477	234.954	290.189
ENSG00000122707.12	RECK	838.153	1746.59	232.525	-2.90634	4.42015e-276	3.53043e-274	1755.78	1737.41	213.801	246.011	237.763
ENSG00000107438.9	PDLIM1	1338.88	2629.67	478.353	-2.45464	1.22341e-274	9.72137e-273	2682.81	2576.53	456.757	464.379	513.922
ENSG00000158710.15	TAGLN2	3016.61	5435.05	1404.31	-1.95142	5.95375e-274	4.7068e-272	5578.95	5291.15	1332.37	1431.84	1448.73
ENSG00000167004.13	PDIA3	5690.04	9507.83	3144.84	-1.59619	1.45552e-273	1.14484e-271	9784.1	9231.57	3111.78	3141.01	3181.74
ENSG00000111961.18	SASH1	2450.1	4224.43	1267.21	-1.73717	2.86408e-273	2.24136e-271	4200.69	4248.18	1292.53	1242.03	1267.08
ENSG00000115594.12	IL1R1	1157.51	2230.23	442.355	-2.33237	3.05631e-271	2.37978e-269	2256.15	2204.32	437.321	434.895	454.851
ENSG00000134871.19	COL4A2	25093.6	49036.5	9131.62	-2.42476	1.36079e-269	1.05427e-267	44669.6	53403.4	9087.53	9036.05	9271.27
ENSG00000119681.12	LTBP2	2012.83	3842.38	793.13	-2.27376	8.41542e-267	6.48741e-265	3874.55	3810.21	798.84	730.66	849.891
ENSG00000106799.13	TGFBR1	1522.6	2795.77	673.827	-2.05398	2.55076e-266	1.95664e-264	2782.21	2809.32	697.77	660.635	663.078
ENSG00000113721.14	PDGFRB	5631.44	10625.1	2302.31	-2.20521	2.8789e-264	2.19747e-262	10665.3	10584.9	2321.69	2110.9	2474.36
ENSG00000153904.21	DDAH1	2330.07	4419.08	937.407	-2.23586	3.72333e-261	2.81429e-259	4645.22	4192.94	903.797	927.837	980.587
ENSG00000174348.14	PODN	739.422	1572.67	183.927	-3.0966	3.67487e-258	2.76418e-256	1522.34	1622.99	197.28	171.378	183.122
ENSG00000130508.11	PXDN	7644.53	12587.9	4348.97	-1.5326	6.77909e-257	5.0745e-255	12571.9	12603.8	4327.53	4203.37	4516.02
ENSG00000169398.19	PTK2	2306.05	4005.78	1172.9	-1.77228	7.36305e-257	5.48512e-255	4048.79	3962.77	1141.89	1211.62	1165.19
ENSG00000187244.12	BCAM	580.906	1294.62	105.096	-3.61743	4.58102e-255	3.39631e-253	1254.29	1334.95	99.1261	106.881	109.282
ENSG00000167553.16	TUBA1C	1616.74	2898.17	762.451	-1.92562	7.55574e-254	5.57506e-252	2902.84	2893.5	767.741	743.56	776.052
ENSG00000122545.20	SEPTIN7	4540.48	7749.86	2400.89	-1.68944	2.97798e-253	2.18691e-251	7749.1	7750.62	2277.96	2440.76	2483.96
ENSG00000235162.9	C12orf75	859.989	1733.67	277.537	-2.64613	2.03587e-251	1.48801e-249	1768.06	1699.27	275.998	289.316	267.299
ENSG00000134243.12	SORT1	1199.24	2441.76	370.896	-2.72038	3.23967e-250	2.34573e-248	2606.86	2276.65	364.434	380.533	367.72
ENSG00000049323.16	LTBP1	2318.25	4079.73	1143.93	-1.83358	4.55971e-250	3.28617e-248	4186.17	3973.3	1117.6	1134.23	1179.95
ENSG00000149218.5	ENDOD1	1299.92	2549.23	467.051	-2.45185	1.23255e-249	8.84185e-248	2648.19	2450.26	501.461	447.794	451.897
ENSG00000148848.14	ADAM12	2732.36	4965.22	1243.79	-1.99559	2.42319e-248	1.73029e-246	4797.11	5133.32	1269.2	1172.93	1289.24
ENSG00000137831.15	UACA	4332.74	7132.96	2465.93	-1.53348	6.02785e-248	4.28448e-246	7179.48	7086.43	2486.9	2527.37	2383.53
ENSG00000178980.15	SELENOW	624.234	1337.67	148.611	-3.17037	8.54938e-247	6.04898e-245	1310.13	1365.2	152.576	145.579	147.679
ENSG00000167601.12	AXL	4828.93	8007.1	2710.16	-1.56369	5.71803e-244	4.02731e-242	8147.83	7866.36	2810.52	2642.54	2677.42
ENSG00000171617.15	ENC1	562.404	1282.67	82.2278	-3.96954	2.76327e-242	1.93742e-240	1359.28	1206.06	88.436	79.2393	79.0081
ENSG00000100097.12	LGALS1	5103.4	8243.24	3010.17	-1.4526	1.79674e-241	1.25408e-239	8236.07	8250.41	2911.59	3044.27	3074.67
ENSG00000111669.15	TPI1	4046.38	7382.3	1822.43	-2.01853	2.45041e-238	1.69505e-236	7156.02	7608.58	1755.11	1960.71	1751.47
ENSG00000176014.13	TUBB6	1828	3378.61	794.264	-2.09073	2.80012e-237	1.92835e-235	3424.44	3332.78	771.628	855.048	756.115
ENSG00000137463.5	MGARP	500.144	1136.44	75.9486	-3.9062	4.03041e-237	2.76332e-235	1169.4	1103.47	80.6614	71.8682	75.3162
ENSG00000132561.14	MATN2	951.892	1879.09	333.757	-2.48899	9.67025e-237	6.60091e-235	1848.48	1909.71	334.308	313.272	353.691
ENSG00000035862.12	TIMP2	12374	19750.3	7456.54	-1.40485	2.49881e-236	1.69821e-234	19715.6	19784.9	7171.09	7525.9	7672.65
ENSG00000169604.21	ANTXR1	3023.97	5101.25	1639.12	-1.63644	2.631e-236	1.78023e-234	4998.16	5204.35	1631.69	1597.69	1687.97
ENSG00000146197.9	SCUBE3	642.231	1569.62	23.9728	-6.0215	7.82295e-236	5.27029e-234	1712.22	1427.02	21.3801	23.9561	26.5822
ENSG00000186479.5	RGS7BP	505.24	1121.5	94.4037	-3.57218	1.43502e-231	9.62581e-230	1130.31	1112.68	92.3233	98.5885	92.2992
ENSG00000115318.12	LOXL3	794.692	1627.28	239.63	-2.76937	2.73983e-230	1.8299e-228	1655.26	1599.31	238.097	260.753	220.041
ENSG00000100644.17	HIF1A	5999.06	10249.8	3165.24	-1.6953	5.25427e-230	3.47927e-228	10670.9	9828.68	3206.05	3059.93	3229.73
ENSG00000182871.16	COL18A1	3316.59	6489.08	1201.59	-2.43105	2.94995e-229	1.94508e-227	5987.74	6990.42	1173.96	1152.66	1278.16
ENSG00000172201.12	ID4	648.7	1440.15	121.065	-3.55607	2.37548e-227	1.55309e-225	1392.78	1487.52	104.957	114.252	143.987
ENSG00000095739.11	BAMBI	447.932	1061.75	38.7234	-4.77087	3.50584e-225	2.26346e-223	1070	1053.5	32.0702	44.2266	39.8733
ENSG00000161638.11	ITGA5	3476.42	6015.86	1783.46	-1.75223	7.95372e-219	5.11381e-217	5992.2	6039.51	1748.31	1703.65	1898.41
ENSG00000164692.18	COL1A2	173811	261658	115247	-1.18293	1.53552e-218	9.83178e-217	257281	266036	114295	115210	116235
ENSG00000026025.16	VIM	26065.9	40919	16163.9	-1.33982	6.84595e-218	4.36535e-216	39973	41864.9	15665.8	16491.9	16334
ENSG00000123416.15	TUBA1B	3542.05	6462.89	1594.82	-2.01666	2.9673e-217	1.87666e-215	6527.2	6398.57	1477.17	1580.18	1727.1
ENSG00000198959.12	TGM2	503.565	1215.04	29.2505	-5.39318	4.24771e-216	2.67554e-214	1135.89	1294.18	38.873	23.0347	25.8438
ENSG00000071282.12	LMCD1	885.045	1779.1	289.008	-2.62519	4.47493e-216	2.80725e-214	1715.57	1842.63	285.716	313.272	268.037
ENSG00000082438.18	COBLL1	1979.41	3348.25	1066.84	-1.65017	1.9417e-215	1.21317e-213	3366.36	3330.15	1089.41	1037.48	1073.62
ENSG00000100243.21	CYB5R3	4851.52	7833.28	2863.68	-1.45079	3.84531e-215	2.39289e-213	7890.95	7775.61	2808.57	2803.78	2978.68
ENSG00000138119.17	MYOF	6834.33	10313.8	4514.67	-1.19223	6.28536e-215	3.89567e-213	10401.8	10225.9	4536.48	4527.7	4479.83
ENSG00000149596.7	JPH2	421.723	980.765	49.0288	-4.31587	9.36017e-215	5.77832e-213	989.579	971.951	48.5912	46.0694	52.426
ENSG00000210082.2	MT-RNR2	21504.3	37840.1	10613.8	-1.83416	9.04908e-214	5.5641e-212	39838.9	35841.2	10363.5	11170	10308
ENSG00000255248.9	MIR100HG	1078.75	2085.86	407.336	-2.3599	1.64936e-212	1.01015e-210	2171.27	2000.46	435.377	391.59	395.041
ENSG00000109610.6	SOD3	1184.4	2293.92	444.724	-2.36253	2.32227e-212	1.41667e-210	2338.8	2249.04	438.293	410.018	485.863
ENSG00000122884.12	P4HA1	3096.63	4994.42	1831.44	-1.44614	5.50343e-212	3.34414e-210	4942.31	5046.52	1795.93	1828.03	1870.35
ENSG00000167641.11	PPP1R14A	777.573	1691.36	168.381	-3.33081	6.96966e-212	4.21855e-210	1533.51	1849.21	172.985	174.142	158.016
ENSG00000112078.14	KCTD20	3953.98	6412.65	2314.88	-1.46921	2.39996e-210	1.44698e-208	6522.74	6302.56	2251.72	2303.47	2389.44
ENSG00000156675.16	RAB11FIP1	585.242	1263.29	133.211	-3.23494	4.1777e-210	2.50905e-208	1244.23	1282.34	132.168	116.095	151.371
ENSG00000151617.17	EDNRA	472.515	1092.59	59.1345	-4.19882	8.09464e-210	4.84272e-208	1144.83	1040.34	64.1404	46.0694	67.1938
ENSG00000065054.14	SLC9A3R2	860.225	1644.65	337.272	-2.28695	2.55236e-208	1.51528e-206	1637.39	1651.92	332.364	350.127	329.324
ENSG00000137501.17	SYTL2	476.244	1040.19	100.279	-3.37104	6.28528e-208	3.71719e-206	1038.72	1041.66	94.2669	103.195	103.375
ENSG00000198840.2	MT-ND3	1454.92	3503.2	89.3928	-5.28912	1.33071e-206	7.84008e-205	3761.74	3244.66	97.1824	72.7896	98.2064
ENSG00000150093.20	ITGB1	30301.9	44979.5	20516.8	-1.13242	2.33957e-206	1.37317e-204	45753	44206	20316	20356.2	20878.1
ENSG00000058668.15	ATP2B4	4599.83	7729.48	2513.39	-1.61984	2.72276e-206	1.59204e-204	7889.83	7569.12	2483.98	2411.27	2644.93
ENSG00000174099.12	MSRB3	1898.11	3210.09	1023.46	-1.64768	7.54165e-205	4.39315e-203	3159.73	3260.44	1022.36	1002.47	1045.57
ENSG00000155366.17	RHOC	2113.32	3662.76	1080.36	-1.7587	1.19791e-204	6.95194e-203	3653.4	3672.11	1034.02	1063.28	1143.77
ENSG00000103888.17	CEMIP	13219.1	31922.3	750.241	-5.40997	1.88043e-203	1.08317e-201	33134.2	30710.5	736.643	633.915	880.165
ENSG00000214517.10	PPME1	1444.3	2768.14	561.744	-2.29729	2.28418e-203	1.31086e-201	2863.75	2672.54	544.222	525.191	615.82
ENSG00000041982.16	TNC	455.874	1084.99	36.4618	-4.88858	1.37388e-202	7.82657e-201	1000.75	1169.24	39.8448	30.4058	39.1349
ENSG00000164402.14	SEPTIN8	1191.44	2123.54	570.04	-1.89721	1.9292e-202	1.09498e-200	2109.84	2137.24	574.348	565.732	570.04
ENSG00000172572.7	PDE3A	545.519	1197.6	110.797	-3.42575	2.97486e-202	1.68232e-200	1228.6	1166.6	115.647	91.2174	125.527
ENSG00000113594.10	LIFR	714.713	1477.45	206.223	-2.84517	3.74825e-202	2.11197e-200	1513.41	1441.49	193.393	234.032	191.244
ENSG00000073712.15	FERMT2	2994.24	4720.21	1843.6	-1.35624	3.87977e-201	2.17029e-199	4697.71	4742.7	1839.66	1851.07	1840.08
ENSG00000187109.15	NAP1L1	4425.02	6800.81	2841.16	-1.25892	1.11453e-200	6.21208e-199	6787.44	6814.18	2793.02	2876.57	2853.89
ENSG00000039560.14	RAI14	2809.98	4471.41	1702.37	-1.39323	6.83475e-200	3.7823e-198	4463.16	4479.66	1725.96	1676.93	1704.21
ENSG00000196616.14	ADH1B	3278.9	7810.6	257.764	-4.91914	7.54705e-200	4.16162e-198	8501.89	7119.31	261.421	223.897	287.974
ENSG00000104936.19	DMPK	1437.21	2662.45	620.387	-2.1011	2.83955e-199	1.56024e-197	2543.2	2781.7	653.066	587.845	620.251
ENSG00000165507.9	DEPP1	2743.09	4562.04	1530.45	-1.57626	1.08116e-198	5.91963e-197	4708.88	4415.21	1498.55	1563.6	1529.21
ENSG00000175183.10	CSRP2	458.631	1043.84	68.4892	-3.94287	1.09541e-198	5.97653e-197	1101.27	986.419	68.9995	77.3966	59.0715
ENSG00000198947.17	DMD	799.438	1642.42	237.453	-2.79278	2.61002e-198	1.41903e-196	1714.45	1570.38	264.336	210.998	237.024
ENSG00000178033.6	CALHM5	579.301	1196.26	167.994	-2.83199	2.46066e-197	1.33315e-195	1214.08	1178.44	157.436	179.671	166.877
ENSG00000152952.12	PLOD2	1970.81	3305.86	1080.78	-1.61106	6.51975e-197	3.51998e-195	3251.32	3360.4	1063.18	1067.89	1111.28
ENSG00000076513.17	ANKRD13A	1103.57	2044.95	475.984	-2.10248	1.39546e-196	7.50789e-195	2121.01	1968.89	473.278	464.379	490.293
ENSG00000002586.20	CD99	1352.04	2479.48	600.419	-2.04294	1.12488e-195	6.01038e-194	2515.27	2443.69	552.968	615.487	632.803
ENSG00000002586.20	PAR	1352.04	2479.48	600.419	-2.04294	1.12488e-195	6.01038e-194	2515.27	2443.69	552.968	615.487	632.803
ENSG00000021645.20	NRXN3	623.956	1304.01	170.587	-2.94257	2.00743e-193	1.06891e-191	1355.92	1252.09	190.478	164.007	157.278
ENSG00000198796.7	ALPK2	1066.44	1921.97	496.08	-1.95243	9.08516e-193	4.80459e-191	1921.08	1922.86	483.968	498.471	505.8
ENSG00000172638.13	EFEMP2	1628.67	2881.67	793.348	-1.85843	1.33279e-192	7.02435e-191	2896.14	2867.19	737.615	815.428	827.001
ENSG00000020181.18	ADGRA2	1950.83	3687.49	793.057	-2.21438	9.97466e-192	5.22153e-190	3485.87	3889.12	801.755	729.739	847.676
ENSG00000154978.13	VOPP1	961.263	1766.86	424.197	-2.05821	6.90556e-191	3.57865e-189	1801.57	1732.15	421.772	421.074	429.745
ENSG00000143248.13	RGS5	476.046	1139.91	33.4705	-5.0928	5.23871e-190	2.70579e-188	1271.04	1008.78	34.0138	33.17	33.2277
ENSG00000163453.11	IGFBP7	21601.8	36795	11472.9	-1.68104	9.15592e-190	4.71332e-188	34633	38957	11082.7	11632.5	11703.5
ENSG00000150347.17	ARID5B	2489.74	4336.75	1258.41	-1.78651	4.26318e-189	2.18013e-187	4550.28	4123.23	1306.13	1226.37	1242.72
ENSG00000100234.12	TIMP3	4015.05	7024.59	2008.69	-1.80429	1.63394e-188	8.32825e-187	6807.55	7241.63	1948.51	1919.25	2158.32
ENSG00000150938.10	CRIM1	7617.92	11480.9	5042.59	-1.18682	6.67209e-188	3.38964e-186	11240.5	11721.3	5098.19	5000.37	5029.2
ENSG00000101000.6	PROCR	372.752	862.692	46.1257	-4.23204	1.0958e-187	5.54883e-186	845.498	879.886	51.5067	43.3052	43.5652
ENSG00000134013.16	LOXL2	6973.71	13039.1	2930.1	-2.15323	3.51051e-186	1.76608e-184	11837	14241.3	2929.08	2847.09	3014.12
ENSG00000102804.15	TSC22D1	1434.81	2438.25	765.855	-1.67071	2.62778e-185	1.31772e-183	2431.51	2445	758.995	775.808	762.761
ENSG00000070087.14	PFN2	2396.68	3994.75	1331.3	-1.58308	2.47417e-183	1.22876e-181	3935.98	4053.52	1268.23	1339.7	1385.96
ENSG00000050165.18	DKK3	6506.4	10290.1	3983.92	-1.3686	2.69987e-183	1.33656e-181	10224.2	10356.1	4071.94	3794.27	4085.53
ENSG00000177697.19	CD151	3678.32	6141.93	2035.92	-1.59141	3.09104e-183	1.52534e-181	5912.9	6370.95	1954.34	2044.56	2108.85
ENSG00000188153.14	COL4A5	1457.89	2488.8	770.619	-1.68993	1.74964e-182	8.60654e-181	2491.82	2485.78	770.657	748.167	793.035
ENSG00000119938.9	PPP1R3C	1576.92	2673.65	845.759	-1.65868	6.19168e-181	3.0265e-179	2639.25	2708.05	815.361	858.733	863.182
ENSG00000137312.15	FLOT1	730.373	1434.64	260.862	-2.4559	2.21147e-180	1.07757e-178	1365.98	1503.3	256.562	257.989	268.037
ENSG00000156026.14	MCU	705.316	1384.44	252.566	-2.44958	5.47775e-180	2.66074e-178	1412.89	1356	241.984	243.246	272.467
ENSG00000115414.21	FN1	307725	535505	155871	-1.78053	3.33355e-179	1.61417e-177	503323	567687	155511	151322	160780
ENSG00000148926.10	ADM	549.804	1141.66	155.236	-2.87201	6.23884e-179	3.01155e-177	1118.02	1165.29	158.407	138.208	169.092
ENSG00000106278.12	PTPRZ1	454.421	981.621	102.955	-3.25664	8.0889e-179	3.89247e-177	987.346	975.897	117.591	89.3746	101.898
ENSG00000159176.14	CSRP1	2845.17	4550.03	1708.6	-1.41202	1.31987e-178	6.33168e-177	4525.71	4574.35	1722.07	1645.6	1758.12
ENSG00000135596.18	MICAL1	947.291	1738.72	419.672	-2.05263	6.03679e-178	2.86933e-176	1792.64	1684.8	430.518	412.782	415.716
ENSG00000198888.2	MT-ND1	4097.8	7556.33	1792.12	-2.0755	2.50854e-177	1.18868e-175	8091.99	7020.67	1787.18	1683.38	1905.79
ENSG00000174804.4	FZD4	931.364	1866.09	308.215	-2.59495	3.83485e-177	1.81162e-175	1957.94	1774.24	317.787	270.888	335.969
ENSG00000129353.15	SLC44A2	2247.83	3957.73	1107.9	-1.83423	4.65136e-176	2.17742e-174	3997.41	3918.06	1075.81	1045.78	1202.1
ENSG00000145623.13	OSMR	2907.82	4702.17	1711.59	-1.45625	9.04624e-176	4.22203e-174	4656.38	4747.96	1688.06	1657.58	1789.13
ENSG00000074590.14	NUAK1	498.867	1038.49	139.118	-2.89258	1.31437e-175	6.11597e-174	1020.85	1056.13	129.253	138.208	149.894
ENSG00000162645.13	GBP2	478.008	1059.33	90.4598	-3.53778	3.26045e-174	1.51259e-172	1104.62	1014.04	69.9713	99.5099	101.898
ENSG00000105329.11	TGFB1	553.066	1146.39	157.516	-2.85711	1.15866e-173	5.35924e-172	1190.62	1102.16	151.605	147.422	173.523
ENSG00000140511.12	HAPLN3	381.97	922.175	21.8335	-5.38087	1.43757e-172	6.62951e-171	982.878	861.473	18.4647	21.1919	25.8438
ENSG00000184584.13	STING1	1058.08	1904.03	494.109	-1.9446	1.12679e-169	5.16557e-168	1960.17	1847.89	486.884	480.043	515.399
ENSG00000126785.13	RHOJ	411.471	897.739	87.2916	-3.35237	4.85786e-169	2.22043e-167	924.799	870.679	78.7178	85.6891	97.468
ENSG00000154553.16	PDLIM3	781.234	1577.6	250.326	-2.6511	1.33242e-168	6.07233e-167	1451.98	1703.22	237.125	252.46	261.391
ENSG00000181104.7	F2R	3072	4860.46	1879.69	-1.37039	3.78067e-168	1.71793e-166	4740.15	4980.76	1929.07	1838.17	1871.83
ENSG00000185483.12	ROR1	740.264	1471.87	252.528	-2.5428	4.8281e-167	2.18109e-165	1561.44	1382.3	233.238	268.124	256.223
ENSG00000140092.15	FBLN5	416.013	888.282	101.167	-3.13137	6.84404e-167	3.0828e-165	897.993	878.57	92.3233	107.802	103.375
ENSG00000153956.16	CACNA2D1	730.497	1363.72	308.351	-2.14462	3.77654e-165	1.68638e-163	1364.86	1362.57	315.843	297.608	311.602
ENSG00000185052.13	SLC24A3	359.211	871.481	17.6977	-5.60947	5.5931e-165	2.49038e-163	894.642	848.32	17.4928	15.6636	19.9366
ENSG00000109743.11	BST1	510.839	1082.19	129.938	-3.06521	5.13245e-164	2.27872e-162	1158.23	1006.15	132.168	137.287	120.358
ENSG00000184702.20	SEPTIN5	424.127	927.29	88.6861	-3.38646	5.8314e-164	2.58165e-162	873.421	981.158	81.6332	99.5099	84.9153
ENSG00000072163.20	LIMS2	956.675	1724.61	444.72	-1.9525	7.47005e-164	3.27899e-162	1736.79	1712.42	442.18	423.838	468.142
ENSG00000187955.12	COL14A1	554.161	1153.42	154.657	-2.89292	8.18728e-164	3.58367e-162	1074.46	1232.37	153.548	146.501	163.923
ENSG00000120913.23	PDLIM2	862.948	1597.41	373.307	-2.09512	1.41597e-163	6.18043e-162	1554.73	1640.09	350.829	392.511	376.581
ENSG00000019549.13	SNAI2	548.608	1127.9	162.414	-2.78611	2.20626e-163	9.6028e-162	1147.06	1108.73	146.745	156.636	183.86
ENSG00000138448.12	ITGAV	2841.09	4678.01	1616.47	-1.53277	2.37593e-163	1.03123e-161	4861.9	4494.12	1612.26	1565.44	1671.72
ENSG00000168575.10	SLC20A2	1067.32	1879.4	525.94	-1.83636	8.14889e-161	3.50742e-159	1904.33	1854.47	536.447	499.392	541.981
ENSG00000154380.17	ENAH	2360.72	3699.76	1468.02	-1.33347	4.02825e-160	1.72425e-158	3755.04	3644.49	1442.19	1480.67	1481.22
ENSG00000198373.13	WWP2	1036.88	1833.2	506.002	-1.85408	5.68541e-160	2.42687e-158	1839.55	1826.85	495.63	489.257	533.12
ENSG00000164574.16	GALNT10	1122	1925.81	586.122	-1.71551	1.53199e-158	6.50359e-157	1944.53	1907.08	586.982	574.025	597.36
ENSG00000164949.8	GEM	1071.58	1910.29	512.446	-1.89402	4.10615e-158	1.73838e-156	1867.47	1953.11	487.856	506.763	542.719
ENSG00000133107.15	TRPC4	488.779	988.954	155.329	-2.66484	7.40847e-158	3.12791e-156	986.229	991.68	149.661	150.186	166.139
ENSG00000185112.6	FAM43A	1014.31	1906.21	419.711	-2.17694	3.13885e-157	1.32164e-155	1876.4	1936.01	395.532	396.197	467.403
ENSG00000182492.16	BGN	10075.4	16975.7	5475.18	-1.63174	2.7738e-156	1.15849e-154	16850.8	17100.6	5236.19	5240.85	5948.5
ENSG00000163531.16	NFASC	434.832	908.72	118.906	-2.9428	7.84148e-156	3.26623e-154	927.033	890.407	123.422	126.23	107.067
ENSG00000142168.15	SOD1	1040.7	1861.21	493.699	-1.91358	8.48637e-156	3.52537e-154	1916.61	1805.8	463.56	513.213	504.323
ENSG00000125753.14	VASP	978.149	1856.28	392.731	-2.24117	1.30235e-155	5.3957e-154	1986.98	1725.58	400.392	373.162	404.64
ENSG00000141052.18	MYOCD	393.369	912.958	46.9759	-4.26322	4.81778e-155	1.98541e-153	1005.22	820.701	39.8448	44.2266	56.8563
ENSG00000004399.13	PLXND1	1945.12	3387.42	983.577	-1.78191	1.37279e-154	5.64229e-153	3488.1	3286.75	960.162	928.759	1061.81
ENSG00000197694.18	SPTAN1	2824.96	4292.66	1846.5	-1.21742	2.17456e-154	8.86704e-153	4335.83	4249.49	1832.86	1865.81	1840.82
ENSG00000101955.15	SRPX	469.057	995.52	118.082	-3.06396	2.2163e-154	9.01353e-153	1008.57	982.473	96.2106	124.387	133.649
ENSG00000166317.12	SYNPO2L	332.74	803.977	18.5831	-5.46585	2.31665e-154	9.397e-153	825.394	782.559	26.2393	14.7422	14.7679
ENSG00000137124.8	ALDH1B1	441.298	937.175	110.713	-3.07507	4.38213e-154	1.77288e-152	969.475	904.875	93.2951	120.702	118.143
ENSG00000128606.13	LRRC17	428.664	896.58	116.721	-2.94499	7.00026e-154	2.82472e-152	871.187	921.973	128.281	109.645	112.236
ENSG00000168461.13	RAB31	1039.53	1837.78	507.371	-1.8599	8.93097e-154	3.59443e-152	1884.22	1791.34	505.349	531.641	485.125
ENSG00000133083.15	DCLK1	393.854	849.331	90.203	-3.23208	1.81612e-153	7.29038e-152	870.07	828.592	76.7741	102.274	91.5608
ENSG00000166444.19	DENND2B	727.079	1381.58	290.743	-2.25259	5.62429e-153	2.25189e-151	1341.41	1421.76	314.871	285.63	271.729
ENSG00000111799.22	COL12A1	3016.83	4992.72	1699.56	-1.55307	9.21513e-153	3.68011e-151	4902.1	5083.35	1713.33	1590.32	1795.04
ENSG00000197702.14	PARVA	2810.79	4266.67	1840.2	-1.21308	1.40166e-152	5.5832e-151	4310.14	4223.19	1827.03	1833.56	1860.01
ENSG00000090924.15	PLEKHG2	376.991	807.896	89.7213	-3.16151	7.25276e-152	2.87421e-150	810.874	804.918	80.6614	90.296	98.2064
ENSG00000101608.13	MYL12A	3958.74	6596.18	2200.45	-1.58474	1.22812e-151	4.85451e-150	6610.97	6581.39	2145.79	2376.26	2079.32
ENSG00000011028.14	MRC2	2486.47	4214.23	1334.63	-1.65628	5.7889e-151	2.28242e-149	4071.13	4357.34	1303.22	1273.36	1427.31
ENSG00000173546.7	CSPG4	1447.3	2534.43	722.538	-1.80663	1.63121e-150	6.41513e-149	2496.29	2572.58	665.7	728.818	773.098
ENSG00000112419.14	PHACTR2	1160.74	2242.05	439.859	-2.34838	2.17149e-150	8.51829e-149	2441.56	2042.54	416.913	436.738	465.926
ENSG00000169764.16	UGP2	1551.72	2537.61	894.469	-1.50508	4.26997e-150	1.67079e-148	2601.28	2473.94	885.332	903.881	894.195
ENSG00000173706.14	HEG1	8045.12	12623.8	4992.68	-1.33827	3.14159e-149	1.22617e-147	13108	12139.5	5043.77	4806.88	5127.41
ENSG00000163171.8	CDC42EP3	3392.56	5456.09	2016.87	-1.43624	3.68309e-148	1.43031e-146	5719.68	5192.51	2027.23	1980.98	2042.4
ENSG00000115091.12	ACTR3	2717.04	4168.93	1749.11	-1.25389	2.65487e-147	1.02843e-145	4196.22	4141.64	1732.76	1802.23	1712.33
ENSG00000115415.20	STAT1	4134.44	7572.11	1842.66	-2.04006	9.38525e-147	3.62654e-145	8314.25	6829.96	1883.4	1880.55	1764.02
ENSG00000115232.14	ITGA4	427.351	893.068	116.873	-2.93104	1.32782e-146	5.11806e-145	858.901	927.234	104.957	128.994	116.666
ENSG00000079308.19	TNS1	2858.27	4749.91	1597.18	-1.5703	1.91918e-146	7.37909e-145	4674.25	4825.56	1575.33	1504.63	1711.6
ENSG00000080573.7	COL5A3	1215.75	2919.63	79.8361	-5.19391	1.05665e-145	4.03269e-144	2490.7	3348.56	81.6332	81.0821	76.7929
ENSG00000174437.17	ATP2A2	3444.05	5218.67	2260.96	-1.20712	1.72446e-145	6.56522e-144	5342.16	5095.18	2284.76	2218.7	2279.42
ENSG00000164056.11	SPRY1	307.294	699.17	46.0436	-3.94463	2.70802e-145	1.02594e-143	717.054	681.287	50.5349	50.6763	36.9197
ENSG00000159200.18	RCAN1	1936.28	3250.12	1060.39	-1.61307	4.54145e-145	1.71634e-143	3256.9	3243.35	1023.33	1016.29	1141.56
ENSG00000151414.15	NEK7	2429.94	3753.4	1547.64	-1.27759	1.18316e-144	4.44977e-143	3736.05	3770.75	1574.36	1497.26	1571.3
ENSG00000168487.20	BMP1	1543.75	2676	788.919	-1.75972	8.75649e-144	3.27734e-142	2538.73	2813.27	797.868	750.01	818.879
ENSG00000164125.16	GASK1B	603.659	1135.79	248.905	-2.1937	2.82432e-142	1.04947e-140	1147.06	1124.52	251.702	257.989	237.024
ENSG00000110237.5	ARHGEF17	1674.91	2651	1024.18	-1.37174	3.57024e-142	1.32347e-140	2620.26	2681.74	1029.16	1019.98	1023.41
ENSG00000183801.8	OLFML1	369.567	784.196	93.1479	-3.06518	4.43444e-142	1.63989e-140	796.355	772.037	90.3797	85.6891	103.375
ENSG00000185551.15	NR2F2	2834.74	4563.12	1682.49	-1.43731	5.21589e-142	1.92429e-140	4519	4607.23	1628.78	1628.09	1790.6
ENSG00000118680.14	MYL12B	3211.53	5237.41	1860.95	-1.49342	9.42103e-142	3.46743e-140	5212.6	5262.22	1793.02	2002.18	1787.65
ENSG00000145632.15	PLK2	682.045	1244.28	307.221	-2.02024	1.65516e-141	6.06304e-140	1250.94	1237.63	314.871	307.744	299.049
ENSG00000112655.16	PTK7	942.88	1650.39	471.204	-1.80826	4.11751e-141	1.50474e-139	1594.94	1705.85	471.335	480.043	462.234
ENSG00000107562.16	CXCL12	532.383	1018.96	207.999	-2.29174	5.4621e-141	1.99142e-139	1018.62	1019.3	203.111	211.919	208.965
ENSG00000112144.16	CILK1	458.336	932.373	142.312	-2.7088	8.1115e-141	2.95042e-139	971.709	893.038	129.253	149.265	148.417
ENSG00000162878.13	PKDCC	764.293	1502.53	272.138	-2.45798	1.24782e-140	4.5281e-139	1393.9	1611.15	257.533	259.831	299.049
ENSG00000145730.20	PAM	4916.79	7078.32	3475.76	-1.02621	1.36606e-140	4.9456e-139	7150.44	7006.2	3440.26	3507.72	3479.31
ENSG00000119699.8	TGFB3	315.88	769.577	13.4147	-5.85748	6.04608e-139	2.16861e-137	768.432	770.722	11.6619	17.5064	11.0759
ENSG00000129038.16	LOXL1	1165.54	2022.39	594.312	-1.76349	1.93387e-138	6.9204e-137	1982.51	2062.27	597.672	554.675	630.588
ENSG00000106823.12	ECM2	546.343	1077.44	192.279	-2.48043	6.52288e-137	2.3235e-135	1048.78	1106.1	168.126	206.391	202.32
ENSG00000165617.15	DACT1	626.302	1175.46	260.2	-2.17353	8.43252e-136	2.98998e-134	1122.49	1228.42	257.533	261.674	261.391
ENSG00000166710.21	B2M	13463.9	20123.2	9024.37	-1.15719	9.54148e-136	3.37546e-134	20900.7	19345.6	8888.3	9207.43	8977.39
ENSG00000196154.12	S100A4	2236.69	3947.83	1095.93	-1.84805	1.04662e-135	3.69418e-134	4227.49	3668.16	1034.99	1092.77	1160.02
ENSG00000129128.13	SPCS3	3303.93	5355.12	1936.47	-1.4675	1.39559e-134	4.90356e-133	5634.79	5075.45	1932.96	1876.87	1999.57
ENSG00000147065.17	MSN	4917.58	7170.28	3415.78	-1.06899	1.80386e-134	6.32371e-133	7033.16	7307.39	3395.55	3373.2	3478.57
ENSG00000120896.13	SORBS3	1526.2	2427.58	925.285	-1.39012	2.19048e-134	7.66175e-133	2403.58	2451.58	914.487	917.702	943.667
ENSG00000112186.12	CAP2	406.688	825.208	127.674	-2.6951	3.03474e-134	1.05908e-132	845.498	804.918	136.055	120.702	126.265
ENSG00000084112.15	SSH1	2284.11	3499.27	1474	-1.24658	4.66188e-134	1.62328e-132	3517.14	3481.4	1481.06	1430.92	1510.02
ENSG00000121039.10	RDH10	486.313	980.723	156.707	-2.63902	1.08592e-133	3.76427e-132	938.202	1023.25	137.027	167.693	165.4
ENSG00000070614.15	NDST1	1817.81	2881.32	1108.81	-1.37841	1.97559e-133	6.8026e-132	2929.65	2833	1145.78	1067.89	1112.76
ENSG00000102038.16	SMARCA1	1524.02	2452.62	904.957	-1.44017	2.00537e-133	6.88985e-132	2514.16	2391.08	927.12	896.51	891.241
ENSG00000128283.7	CDC42EP1	935.037	1614.56	482.021	-1.74116	2.3051e-133	7.88467e-132	1583.77	1645.35	481.053	464.379	500.631
ENSG00000131873.7	CHSY1	1153.86	1940.63	629.343	-1.62161	2.88082e-133	9.83224e-132	1888.69	1992.57	612.249	623.78	652.002
ENSG00000142173.16	COL6A2	17271.8	29927	8835	-1.75991	4.59557e-133	1.56502e-131	27173.2	32680.7	8831.94	8604.84	9068.21
ENSG00000166741.8	NNMT	1546.64	2546.69	879.946	-1.53459	6.62308e-133	2.25054e-131	2587.87	2505.5	853.262	935.209	851.368
ENSG00000118762.8	PKD2	4276.82	6517.18	2783.24	-1.22672	1.17886e-132	3.9883e-131	6589.75	6444.6	2777.47	2667.42	2904.84
ENSG00000157483.9	MYO1E	888.375	1538.64	454.864	-1.75581	1.53464e-132	5.18067e-131	1505.59	1571.69	439.265	461.615	463.711
ENSG00000148175.13	STOM	1816.54	2985.09	1037.51	-1.52767	3.98038e-132	1.33787e-130	3079.31	2890.87	1083.58	1047.62	981.325
ENSG00000079739.17	PGM1	1476.2	2397.49	862.01	-1.47842	1.33627e-131	4.48172e-130	2409.17	2385.82	886.304	880.847	818.879
ENSG00000134668.12	SPOCD1	258.615	609.688	24.5658	-4.6656	9.97164e-130	3.32997e-128	606.48	612.895	31.0984	24.8775	17.7214
ENSG00000068383.19	INPP5A	745.665	1405.09	306.046	-2.19489	1.57864e-129	5.24916e-128	1476.55	1333.64	295.435	287.473	335.231
ENSG00000168734.14	PKIG	549.23	1037.12	223.971	-2.21014	9.88394e-129	3.27948e-127	1073.35	1000.89	216.717	224.819	230.379
ENSG00000168405.17	CMAHP	274.43	606.995	52.7207	-3.524	1.70885e-128	5.65782e-127	599.779	614.21	52.4785	52.5191	53.1643
ENSG00000076706.17	MCAM	735.955	1361.86	318.683	-2.08899	4.18582e-128	1.37999e-126	1319.07	1404.66	290.575	320.643	344.83
ENSG00000155792.10	DEPTOR	737.415	1317.83	350.472	-1.91092	5.12298e-128	1.68536e-126	1333.59	1302.07	331.392	372.241	347.783
ENSG00000113758.13	DBN1	1388.51	2316	770.194	-1.58848	7.24959e-128	2.37992e-126	2238.28	2393.71	751.22	813.585	745.778
ENSG00000151474.23	FRMD4A	686.817	1264.32	301.813	-2.06287	1.06711e-127	3.49576e-126	1284.44	1244.2	303.209	277.338	324.893
ENSG00000026103.22	FAS	561.585	1058.84	230.078	-2.19924	4.09043e-127	1.33716e-125	1087.87	1029.82	228.379	217.448	244.408
ENSG00000243244.7	STON1	309.743	658.132	77.4842	-3.08913	5.11245e-127	1.66423e-125	653.39	662.874	80.6614	76.4752	75.3162
ENSG00000213949.10	ITGA1	2329.02	3540.79	1521.18	-1.21744	6.90165e-126	2.22794e-124	3538.36	3543.22	1500.5	1488.04	1574.99
ENSG00000077942.19	FBLN1	310.78	664.724	74.817	-3.14676	5.60465e-125	1.7943e-123	690.248	639.199	71.915	72.7896	79.7465
ENSG00000227544.10	AC018647.1	244.357	563.341	31.7014	-4.1408	2.58549e-124	8.26023e-123	572.973	553.71	31.0984	28.563	35.4429
ENSG00000166483.12	WEE1	438.39	850.197	163.852	-2.37732	5.42095e-124	1.72835e-122	845.498	854.896	163.266	169.535	158.755
ENSG00000162704.16	ARPC5	2517.17	3745.07	1698.57	-1.14099	1.48741e-123	4.73253e-122	3770.68	3719.46	1670.57	1738.66	1686.49
ENSG00000071967.12	CYBRD1	2799.82	4234.31	1843.49	-1.20039	2.00897e-123	6.36584e-122	4378.27	4090.35	1832.86	1850.15	1847.46
ENSG00000189184.12	PCDH18	510.226	1056.5	146.043	-2.84815	4.21329e-123	1.33235e-121	1106.85	1006.15	152.576	117.938	167.615
ENSG00000197324.9	LRP10	3458.92	5284.05	2242.16	-1.23571	4.15401e-122	1.31093e-120	5324.29	5243.8	2236.17	2138.54	2351.78
ENSG00000163399.16	ATP1A1	2903.06	4322.77	1956.59	-1.14366	4.30804e-122	1.35677e-120	4426.3	4219.24	1953.37	1925.7	1990.71
ENSG00000172575.12	RASGRP1	255.925	572.475	44.8909	-3.67886	4.32345e-122	1.35886e-120	588.61	556.34	47.6194	44.2266	42.8268
ENSG00000198053.12	SIRPA	717.554	1278.87	343.345	-1.90034	5.11691e-122	1.60499e-120	1328	1229.74	345.969	351.049	333.016
ENSG00000112139.17	MDGA1	295.43	649.86	59.143	-3.4557	8.2658e-122	2.58744e-120	694.716	605.004	61.2249	53.4405	62.7635
ENSG00000108691.9	CCL2	665.424	1312.99	233.716	-2.48606	1.18012e-121	3.6867e-120	1425.17	1200.8	221.576	221.133	258.438
ENSG00000105971.15	CAV2	1141.04	1908.63	629.309	-1.60157	1.75517e-121	5.4721e-120	1960.17	1857.1	656.953	595.216	635.757
ENSG00000111348.9	ARHGDIB	236.243	553.837	24.5134	-4.49951	4.03795e-121	1.25387e-119	576.324	531.351	24.2956	24.8775	24.367
ENSG00000130429.15	ARPC1B	682.422	1246.21	306.561	-2.01751	4.28673e-121	1.32846e-119	1199.56	1292.87	293.491	297.608	328.585
ENSG00000157227.14	MMP14	4594.48	7177.62	2872.39	-1.32049	5.38188e-121	1.66452e-119	6787.44	7567.81	2898.95	2811.15	2907.06
ENSG00000108797.12	CNTNAP1	496.257	994.471	164.115	-2.60215	6.18031e-121	1.90765e-119	931.5	1057.44	185.618	150.186	156.539
ENSG00000182534.13	MXRA7	3280.79	5499.78	1801.47	-1.60888	1.23437e-120	3.80249e-119	5116.55	5883	1708.47	1852.91	1843.03
ENSG00000166106.3	ADAMTS15	489.006	925.26	198.171	-2.22101	1.80611e-120	5.55271e-119	925.916	924.603	185.618	207.312	201.581
ENSG00000148841.17	ITPRIP	559.961	1024.52	250.256	-2.03221	5.44875e-120	1.66855e-118	1015.27	1033.77	254.618	241.404	254.746
ENSG00000140682.19	TGFB1I1	1161.99	1901.37	669.062	-1.50592	9.95491e-120	3.04243e-118	1945.65	1857.1	662.784	653.264	691.136
ENSG00000137818.12	RPLP1	3896.25	5622.36	2745.51	-1.03415	1.07277e-119	3.27215e-118	5602.4	5642.32	2693.9	2823.13	2719.5
ENSG00000117586.11	TNFSF4	368.069	738.231	121.294	-2.60407	1.27901e-119	3.88592e-118	721.522	754.939	122.45	118.859	122.573
ENSG00000166794.6	PPIB	3542.48	5583.07	2182.08	-1.35459	1.51219e-119	4.58541e-118	5526.45	5639.69	2031.11	2304.39	2210.75
ENSG00000131620.17	ANO1	918.779	1743.69	368.836	-2.24057	1.82562e-119	5.52499e-118	1914.38	1573.01	365.406	351.97	389.133
ENSG00000014216.16	CAPN1	700.634	1225.28	350.867	-1.80643	9.38844e-119	2.83575e-117	1235.3	1215.27	361.519	349.206	341.876
ENSG00000141429.13	GALNT1	915.187	1529.28	505.792	-1.59718	1.75738e-118	5.29779e-117	1559.2	1499.36	509.236	503.078	505.061
ENSG00000162433.15	AK4	632.013	1145.51	289.679	-1.98256	2.42451e-118	7.29472e-117	1096.8	1194.22	295.435	285.63	287.974
ENSG00000115461.5	IGFBP5	16531.9	36744.1	3057.06	-3.58691	3.52366e-118	1.05812e-116	35909.7	37578.6	2825.09	2782.59	3563.49
ENSG00000143870.13	PDIA6	1889.05	2977.64	1163.32	-1.35441	6.2212e-118	1.86456e-116	3044.69	2910.59	1122.46	1146.21	1221.3
ENSG00000138650.9	PCDH10	353.991	719.233	110.496	-2.69754	1.09323e-117	3.27019e-116	705.885	732.58	112.732	101.353	117.405
ENSG00000131171.13	SH3BGRL	937.683	1586.55	505.106	-1.6526	1.29928e-117	3.87906e-116	1647.44	1525.66	512.151	496.628	506.538
ENSG00000163110.15	PDLIM5	2719.94	4302.15	1665.14	-1.37046	1.68898e-117	5.03284e-116	4517.89	4086.4	1716.24	1613.35	1665.82
ENSG00000163815.6	CLEC3B	312.256	706.284	49.5715	-3.82429	2.26033e-117	6.72241e-116	622.117	790.45	51.5067	43.3052	53.9027
ENSG00000072195.15	SPEG	358.591	760.078	90.9326	-3.06484	7.16985e-117	2.12829e-115	690.248	829.907	94.2669	92.1388	86.3921
ENSG00000099953.10	MMP11	264.396	631.509	19.654	-4.98918	1.00771e-116	2.98555e-115	560.687	702.33	20.4083	15.6636	22.8902
ENSG00000172348.15	RCAN2	552.311	1068.69	208.06	-2.35705	1.60582e-116	4.7485e-115	1132.54	1004.83	206.027	190.727	227.425
ENSG00000157110.16	RBPMS	760.319	1325.63	383.444	-1.78538	1.71027e-116	5.04774e-115	1312.37	1338.9	371.237	372.241	406.855
ENSG00000118257.17	NRP2	231.402	545.748	21.8376	-4.64107	6.18199e-116	1.8211e-114	578.558	512.938	22.352	20.2705	22.8902
ENSG00000050405.13	LIMA1	1878.03	2977.34	1145.16	-1.37647	1.10145e-115	3.2385e-114	2988.84	2965.83	1070.95	1168.32	1196.2
ENSG00000142669.15	SH3BGRL3	1741.82	2970.6	922.626	-1.6861	1.37151e-115	4.02492e-114	3123.99	2817.21	845.487	964.693	957.697
ENSG00000159335.18	PTMS	1280.78	2378.81	548.755	-2.11213	3.98202e-114	1.1533e-112	2145.58	2612.04	515.067	542.697	588.5
ENSG00000176692.8	FOXC2	299.375	632.991	76.965	-3.02811	5.73261e-114	1.65413e-112	625.468	640.515	68.0277	76.4752	86.3921
ENSG00000112769.20	LAMA4	256.928	575.356	44.6428	-3.6821	6.57689e-114	1.89422e-112	615.416	535.297	43.7321	41.4624	48.734
ENSG00000146250.7	PRSS35	276.215	676.363	9.44941	-6.15292	1.08549e-113	3.11475e-112	692.482	660.243	9.71824	8.29249	10.3375
ENSG00000132274.16	TRIM22	966.59	1634.36	521.409	-1.65031	1.5474e-113	4.43196e-112	1708.87	1559.86	534.503	511.37	518.352
ENSG00000168056.17	LTBP3	1143.25	1913.33	629.86	-1.60471	1.6577e-113	4.73912e-112	1840.66	1985.99	651.122	644.05	594.407
ENSG00000148120.17	AOPEP	407.152	829.67	125.473	-2.7323	2.26091e-113	6.45171e-112	795.238	864.103	147.717	114.252	114.451
ENSG00000137962.13	ARHGAP29	982.238	1639.78	543.877	-1.59549	3.96343e-113	1.12892e-111	1655.26	1624.3	576.292	536.248	519.091
ENSG00000011105.14	TSPAN9	516.124	980.155	206.77	-2.23684	5.19454e-113	1.47687e-111	959.423	1000.89	195.337	195.334	229.64
ENSG00000168497.5	CAVIN2	266.896	577.178	60.0411	-3.26706	1.05974e-112	2.99648e-111	587.493	566.862	67.0559	52.5191	60.5483
ENSG00000143933.19	CALM2	5334.75	7956.45	3586.95	-1.14985	1.0778e-112	3.04199e-111	8029.44	7883.46	3493.71	3787.83	3479.31
ENSG00000138771.16	SHROOM3	285.702	609.082	70.1155	-3.11689	4.60316e-112	1.29214e-110	635.52	582.645	63.1686	75.5538	71.6242
ENSG00000088986.11	DYNLL1	1140.3	1902.05	632.467	-1.58881	5.94823e-112	1.66368e-110	1982.51	1821.59	601.559	657.871	637.972
ENSG00000196526.10	AFAP1	2368.27	3532.28	1592.26	-1.14824	6.28465e-112	1.75461e-110	3449.01	3615.55	1556.86	1608.74	1611.17
ENSG00000210151.2	MT-TS1	239.493	581.123	11.7403	-5.62057	1.31825e-111	3.6738e-110	587.493	574.753	10.6901	11.978	12.5527
ENSG00000166974.13	MAPRE2	1064.49	1775.35	590.585	-1.5845	2.15208e-111	5.95473e-110	1794.87	1755.83	559.771	581.396	630.588
ENSG00000198668.13	CALM1	2880.87	4159.85	2028.22	-1.03669	4.50356e-111	1.2439e-109	4209.62	4110.08	2055.41	1995.73	2033.54
ENSG00000188229.6	TUBB4B	1079.72	1741.22	638.713	-1.44692	1.36117e-110	3.73959e-109	1779.23	1703.22	635.573	632.993	647.571
ENSG00000139289.14	PHLDA1	2502.48	3746.65	1673.03	-1.16348	2.86603e-110	7.84614e-109	3834.34	3658.96	1621.97	1723.92	1673.2
ENSG00000136205.17	TNS3	1389.93	2193.79	854.019	-1.35932	6.73635e-110	1.83122e-108	2214.83	2172.75	844.515	825.563	891.98
ENSG00000178996.14	SNX18	1828.81	2944.41	1085.08	-1.43995	1.5435e-109	4.18853e-108	3100.53	2788.28	1055.4	1075.26	1124.57
ENSG00000170558.10	CDH2	1046.74	1749.19	578.434	-1.59602	3.20759e-109	8.68908e-108	1822.79	1675.6	551.024	590.61	593.669
ENSG00000117600.13	PLPPR4	230.407	523.175	35.2292	-3.89527	1.07144e-108	2.89233e-107	543.934	502.416	29.1547	43.3052	33.2277
ENSG00000137809.17	ITGA11	2464.99	4299.31	1242.12	-1.78943	1.40045e-108	3.76736e-107	4261	4337.61	1262.4	1092.77	1371.2
ENSG00000013288.9	MAN2B2	754.229	1333.02	368.37	-1.85031	2.24458e-108	6.02768e-107	1340.29	1325.75	355.688	345.52	403.901
ENSG00000106483.12	SFRP4	218.97	502.919	29.6714	-4.0806	4.30006e-108	1.15276e-106	475.802	530.036	31.0984	27.6416	30.2741
ENSG00000117394.24	SLC2A1	1208.07	1956.68	708.99	-1.46321	4.40396e-108	1.17857e-106	1870.82	2042.54	708.46	710.39	708.12
ENSG00000163909.8	HEYL	233.405	522.455	40.7049	-3.66894	4.73553e-108	1.26512e-106	537.232	507.677	39.8448	35.0127	47.2572
ENSG00000148677.7	ANKRD1	2903.79	4678.71	1720.5	-1.44499	8.0308e-108	2.14178e-106	4691.01	4666.42	1734.71	1847.38	1579.42
ENSG00000099250.18	NRP1	1547.35	2643.79	816.39	-1.69294	8.15096e-108	2.17009e-106	2657.12	2630.45	831.882	729.739	887.549
ENSG00000184374.3	COLEC10	317.299	659.124	89.4161	-2.87262	1.70685e-107	4.52869e-106	642.221	676.026	91.3515	76.4752	100.422
ENSG00000110090.13	CPT1A	1264.93	2009.16	768.768	-1.3873	4.51724e-107	1.19445e-105	2079.68	1938.64	774.544	763.83	767.929
ENSG00000070404.10	FSTL3	1291.79	2195.29	689.457	-1.67001	1.37908e-106	3.64035e-105	2035	2355.57	709.432	678.141	680.799
ENSG00000109861.17	CTSC	386.27	804.504	107.448	-2.90647	3.26987e-106	8.60215e-105	893.525	715.483	110.788	102.274	109.282
ENSG00000113657.13	DPYSL3	862.429	1517.8	425.514	-1.83018	3.66427e-106	9.62336e-105	1421.82	1613.78	412.053	415.546	448.943
ENSG00000108679.13	LGALS3BP	5540.22	8008.87	3894.45	-1.03999	5.59569e-106	1.46709e-104	8231.6	7786.13	3778.45	3909.45	3995.45
ENSG00000197747.9	S100A10	1149.37	2050.64	548.53	-1.89805	8.96347e-106	2.3461e-104	1908.79	2192.48	498.546	559.282	587.761
ENSG00000110880.11	CORO1C	3569.63	5384.74	2359.55	-1.19095	1.14938e-105	3.0033e-104	5649.31	5120.17	2331.41	2372.57	2374.67
ENSG00000150764.14	DIXDC1	332.74	664.672	111.451	-2.57008	2.0532e-105	5.35595e-104	661.209	668.134	103.985	111.488	118.881
ENSG00000061337.15	LZTS1	207.919	476.479	28.8784	-4.03511	8.78958e-105	2.28514e-103	484.738	468.22	24.2956	31.3272	31.0125
ENSG00000113361.13	CDH6	217.822	504.835	26.4801	-4.26516	1.22763e-104	3.18628e-103	528.297	481.372	34.9857	19.3491	25.1054
ENSG00000167772.12	ANGPTL4	231.671	558.409	13.846	-5.33196	3.01141e-104	7.76403e-103	502.608	614.21	11.6619	16.585	13.2911
ENSG00000197448.14	GSTK1	400.846	766.957	156.771	-2.29229	3.12106e-104	8.03335e-103	746.094	787.82	155.492	164.928	149.894
ENSG00000147853.17	AK3	912.331	1538.69	494.755	-1.63246	6.63115e-104	1.69834e-102	1534.63	1542.76	470.363	480.043	533.859
ENSG00000106484.16	MEST	1163.51	2597.69	207.387	-3.64572	1.02521e-103	2.6214e-102	2428.16	2767.23	174.928	240.482	206.75
ENSG00000038427.16	VCAN	3835.26	8405.29	788.574	-3.41316	2.69096e-103	6.86926e-102	8699.59	8110.99	818.276	660.635	886.811
ENSG00000139329.5	LUM	977.764	1824.09	413.547	-2.13787	5.39207e-103	1.36968e-101	1979.16	1669.02	383.871	395.275	461.496
ENSG00000204525.17	HLA-C	5843.19	8461.96	4097.34	-1.04567	1.3016e-102	3.29009e-101	8594.6	8329.32	3957.27	4055.03	4279.73
ENSG00000089472.16	HEPH	466.488	868.193	198.684	-2.12403	1.41845e-102	3.57961e-101	894.642	841.744	186.59	199.02	210.442
ENSG00000086289.12	EPDR1	643.436	1139.81	312.52	-1.87044	1.6879e-102	4.25269e-101	1131.43	1148.19	309.04	339.071	289.45
ENSG00000143878.10	RHOB	1684.81	2843.47	912.367	-1.63626	3.48943e-101	8.72077e-100	2807.9	2879.03	843.543	879.004	1014.55
ENSG00000122694.16	GLIPR2	246.283	527.282	58.9494	-3.16484	7.02486e-101	1.75e-99	549.518	505.046	57.3376	62.6544	56.8563
ENSG00000170004.17	CHD3	1270.29	2056.08	746.427	-1.46184	2.05104e-100	5.08494e-99	1951.24	2160.92	762.882	752.774	723.626
ENSG00000196628.20	TCF4	459.096	851.466	197.517	-2.10431	3.08605e-100	7.6387e-99	875.655	827.277	186.59	196.256	209.704
ENSG00000177119.17	ANO6	1613.14	2500.2	1021.76	-1.2891	3.14388e-100	7.76945e-99	2504.1	2496.3	1022.36	969.3	1073.62
ENSG00000106617.15	PRKAG2	605.224	1070.24	295.214	-1.85913	3.52709e-100	8.7026e-99	1122.49	1017.98	295.435	291.159	299.049
ENSG00000079819.19	EPB41L2	1379.4	2106.54	894.636	-1.23474	1.31878e-99	3.24358e-98	2108.72	2104.36	869.783	910.331	903.794
ENSG00000169991.11	IFFO2	321.879	642.72	107.985	-2.57664	1.76442e-99	4.33277e-98	634.403	651.036	103.013	119.78	101.16
ENSG00000147027.4	TMEM47	3012.43	4738.42	1861.77	-1.34699	6.69801e-99	1.64218e-97	4922.21	4554.62	1855.21	1749.72	1980.37
ENSG00000110906.13	KCTD10	1048.98	1674.44	632.006	-1.40632	1.8394e-98	4.4955e-97	1716.69	1632.19	614.193	650.5	631.327
ENSG00000082512.15	TRAF5	325.737	638.8	117.028	-2.45127	3.08115e-98	7.50668e-97	648.923	628.678	117.591	119.78	113.713
ENSG00000184408.10	KCND2	205.601	471.604	28.2663	-4.04005	1.95496e-96	4.74055e-95	502.608	440.6	24.2956	25.7989	34.7045
ENSG00000069122.19	ADGRF5	402.086	998.542	4.44915	-7.75795	4.34578e-96	1.05051e-94	944.903	1052.18	4.85912	1.84278	6.64554
ENSG00000177700.6	POLR2L	785.365	1293.22	446.794	-1.53309	7.44912e-96	1.78952e-94	1292.26	1294.18	431.49	464.379	444.513
ENSG00000131016.17	AKAP12	1060.38	1875.73	516.805	-1.86141	8.91024e-96	2.13722e-94	1723.39	2028.08	543.25	531.641	475.526
ENSG00000163191.6	S100A11	1493.28	2375.36	905.222	-1.39	1.37985e-95	3.30461e-94	2339.92	2410.81	834.797	956.4	924.469
ENSG00000171150.9	SOCS5	836.807	1369.78	481.495	-1.5101	4.89271e-95	1.16635e-93	1415.12	1324.43	486.884	479.122	478.479
ENSG00000183853.18	KIRREL1	1468.77	2231.62	960.207	-1.21463	5.85951e-95	1.39467e-93	2181.32	2281.92	950.444	944.422	985.756
ENSG00000185201.17	IFITM2	1150.7	1983.82	595.287	-1.73338	7.44679e-95	1.76434e-93	1994.8	1972.84	518.954	631.151	635.757
ENSG00000034152.19	MAP2K3	1015.52	1605.3	622.329	-1.36838	9.48109e-95	2.24289e-93	1636.27	1574.32	637.517	609.959	619.512
ENSG00000197461.13	PDGFA	870.562	1485.87	460.359	-1.69077	2.69223e-94	6.35916e-93	1440.81	1530.92	501.461	421.074	458.542
ENSG00000008256.16	CYTH3	1711.62	2579.1	1133.3	-1.18476	3.49223e-94	8.23625e-93	2526.44	2631.77	1086.5	1163.71	1149.68
ENSG00000105270.15	CLIP3	496.89	902.452	226.515	-1.98791	7.10337e-94	1.67275e-92	901.344	903.56	206.999	226.661	245.885
ENSG00000160408.15	ST6GALNAC6	474.404	873.188	208.548	-2.06034	7.54286e-94	1.77354e-92	830.979	915.397	206.027	198.098	221.518
ENSG00000024422.12	EHD2	5135.86	7543.09	3531.04	-1.09402	1.16525e-93	2.72742e-92	7567.04	7519.14	3391.67	3453.36	3748.09
ENSG00000176658.17	MYO1D	1275.91	1939.15	833.761	-1.21867	1.36007e-93	3.17863e-92	1964.64	1913.65	836.741	837.541	827.001
ENSG00000145675.15	PIK3R1	1007.85	2196.55	215.383	-3.34787	1.83798e-93	4.28909e-92	2428.16	1964.95	209.914	196.256	239.978
ENSG00000166387.13	PPFIBP2	392.928	753.329	152.661	-2.29863	2.09947e-93	4.89192e-92	707.002	799.657	155.492	143.736	158.755
ENSG00000156804.7	FBXO32	913.746	1462.8	547.708	-1.41635	3.38764e-93	7.86979e-92	1470.97	1454.64	554.912	527.034	561.179
ENSG00000162407.9	PLPP3	448.335	897.061	149.184	-2.57995	4.88407e-93	1.13122e-91	969.475	824.646	135.084	138.208	174.261
ENSG00000136244.12	IL6	308.363	605.518	110.261	-2.46008	5.09584e-93	1.17851e-91	594.194	616.841	113.703	111.488	105.59
ENSG00000182197.12	EXT1	3846.48	5564.48	2701.15	-1.04134	1.57346e-92	3.61732e-91	5402.48	5726.49	2602.55	2720.86	2780.05
ENSG00000117298.16	ECE1	2051.51	3025.3	1402.32	-1.10896	2.0321e-92	4.65789e-91	3078.2	2972.41	1419.84	1347.99	1439.13
ENSG00000149212.12	SESN3	617.263	1048.43	329.817	-1.6671	4.31e-92	9.8211e-91	1064.41	1032.45	323.617	326.171	339.661
ENSG00000117758.14	STX12	1075.28	1705.07	655.422	-1.37834	5.70814e-92	1.29879e-90	1756.89	1653.24	634.601	652.343	679.322
ENSG00000168899.5	VAMP5	422.633	777.917	185.776	-2.06208	6.83994e-92	1.55403e-90	793.004	762.831	175.9	184.278	197.151
ENSG00000168807.16	SNTB2	573.935	1041.95	261.922	-1.99174	1.51229e-91	3.43087e-90	1063.3	1020.61	285.716	227.583	272.467
ENSG00000107372.13	ZFAND5	2465.46	3530.5	1755.44	-1.00868	1.94087e-91	4.39676e-90	3609.84	3451.15	1731.79	1783.81	1750.73
ENSG00000084636.18	COL16A1	1051.48	1876.96	501.156	-1.9007	3.01201e-91	6.81329e-90	1702.17	2051.75	467.447	498.471	537.551
ENSG00000180801.14	ARSJ	419.355	799.159	166.152	-2.2595	5.14193e-91	1.16143e-89	790.77	807.548	171.041	142.815	184.598
ENSG00000156642.17	NPTN	2140.67	3229.44	1414.82	-1.18979	8.22146e-91	1.84952e-89	3319.45	3139.44	1339.17	1437.36	1467.93
ENSG00000100242.15	SUN2	842.688	1383.31	482.274	-1.51636	8.22409e-91	1.84952e-89	1373.8	1392.82	470.363	462.537	513.922
ENSG00000073910.23	FRY	1039.53	1759.42	559.593	-1.65285	1.09306e-90	2.45107e-89	1744.61	1774.24	613.221	498.471	567.086
ENSG00000163513.19	TGFBR2	698.739	1155.91	393.962	-1.55299	6.97179e-90	1.5499e-88	1164.93	1146.88	404.279	379.612	397.994
ENSG00000142798.20	HSPG2	4264.78	6976.47	2456.98	-1.50514	3.44936e-89	7.63541e-88	6408.81	7544.13	2584.08	2308.08	2478.79
ENSG00000177374.13	HIC1	294.234	598.07	91.6776	-2.6952	6.83677e-89	1.50906e-87	559.57	636.569	83.5769	90.296	101.16
ENSG00000184557.4	SOCS3	197.693	451.51	28.481	-3.95105	1.00228e-88	2.20915e-87	440.061	462.959	22.352	23.9561	39.1349
ENSG00000111145.8	ELK3	540.368	933.673	278.164	-1.74779	1.37859e-88	3.03427e-87	934.851	932.495	290.575	266.281	277.636
ENSG00000122359.18	ANXA11	2166.22	3270.25	1430.2	-1.19139	1.5506e-88	3.40803e-87	3252.43	3288.06	1332.37	1469.61	1488.6
ENSG00000131378.14	RFTN1	350.988	668.581	139.259	-2.2562	1.86308e-88	4.08902e-87	669.027	668.134	130.224	135.444	152.109
ENSG00000071575.11	TRIB2	707.371	1180.57	391.904	-1.58874	2.06982e-88	4.53633e-87	1153.76	1207.38	402.335	369.476	403.901
ENSG00000259330.3	INAFM2	439.942	804.467	196.925	-2.02727	4.68464e-88	1.02237e-86	760.613	848.32	195.337	195.334	200.105
ENSG00000164096.13	C4orf3	1431.08	2214.32	908.923	-1.28497	5.13844e-88	1.11983e-86	2124.36	2304.27	915.458	937.051	874.258
ENSG00000131747.15	TOP2A	175.058	412.711	16.6226	-4.64997	9.19776e-88	1.99887e-86	440.061	385.361	19.4365	15.6636	14.7679
ENSG00000204291.11	COL15A1	706.318	1318.63	298.109	-2.14194	1.18952e-87	2.57784e-86	1161.58	1475.68	288.632	302.215	303.48
ENSG00000173918.15	C1QTNF1	320.807	626.53	116.992	-2.42258	2.23974e-87	4.84704e-86	661.209	591.851	122.45	109.645	118.881
ENSG00000183722.9	LHFPL6	693.926	1144.87	393.295	-1.53962	4.3719e-87	9.39564e-86	1133.66	1156.08	397.476	377.769	404.64
ENSG00000155760.3	FZD7	272.658	559.505	81.4266	-2.76867	6.55402e-87	1.40657e-85	549.518	569.493	80.6614	69.1041	94.5144
ENSG00000178922.18	HYI	311.329	621.535	104.524	-2.56184	6.90748e-87	1.48038e-85	584.142	658.928	94.2669	104.117	115.189
ENSG00000151067.22	CACNA1C	269.535	540.022	89.2098	-2.59446	6.3614e-86	1.35027e-84	517.128	562.916	90.3797	85.6891	91.5608
ENSG00000165802.23	NSMF	315.897	622.856	111.258	-2.4769	1.1391e-85	2.41454e-84	643.338	602.373	96.2106	114.252	123.312
ENSG00000172757.13	CFL1	4722.74	6808.53	3332.21	-1.0299	2.80725e-85	5.9101e-84	6804.2	6812.87	3141.91	3376.89	3477.83
ENSG00000156466.10	GDF6	202.271	493.885	7.86119	-5.98445	4.56798e-85	9.60392e-84	459.049	528.721	6.80277	10.1353	6.64554
ENSG00000141526.18	SLC16A3	1343.21	2291.46	711.044	-1.68457	9.73374e-85	2.03541e-83	2099.78	2483.15	683.192	682.748	767.191
ENSG00000204592.9	HLA-E	2454.57	3613.77	1681.77	-1.10251	1.22755e-84	2.56346e-83	3701.43	3526.12	1602.54	1686.14	1756.64
ENSG00000126062.4	TMEM115	352.423	660.815	146.828	-2.16855	6.00515e-84	1.24732e-82	682.43	639.199	148.689	138.208	153.586
ENSG00000183496.6	MEX3B	695.772	1554.88	123.033	-3.66027	1.04122e-83	2.15691e-82	1448.63	1661.13	144.802	99.5099	124.789
ENSG00000077549.19	CAPZB	1868.82	2833.17	1225.91	-1.20595	2.08926e-83	4.31067e-82	2738.66	2927.69	1159.39	1236.5	1281.85
ENSG00000106991.14	ENG	3119.61	5964.47	1223.03	-2.28502	2.25089e-83	4.63797e-82	6134.05	5794.88	1213.81	1093.69	1361.6
ENSG00000131724.11	IL13RA1	1033.04	1596.98	657.075	-1.28029	3.34599e-83	6.87614e-82	1626.22	1567.75	652.094	641.286	677.845
ENSG00000139926.16	FRMD6	2170.92	3171.75	1503.7	-1.07743	6.56511e-83	1.34381e-81	3302.69	3040.8	1500.5	1488.04	1522.57
ENSG00000141736.14	ERBB2	777.212	1242.73	466.866	-1.41236	1.2764e-82	2.60234e-81	1260.99	1224.47	472.307	454.244	474.049
ENSG00000173517.10	PEAK1	1662.09	2447.14	1138.73	-1.10542	1.31003e-82	2.66739e-81	2479.53	2414.75	1188.54	1114.88	1112.76
ENSG00000103187.8	COTL1	505.051	881.105	254.348	-1.7885	1.96649e-82	3.99355e-81	845.498	916.712	245.872	254.303	262.868
ENSG00000203867.8	RBM20	191.501	411.605	44.7648	-3.1962	3.4125e-82	6.92103e-81	415.489	407.72	43.7321	43.3052	47.2572
ENSG00000104964.15	TLE5	1235.57	2070.99	678.623	-1.60511	6.96606e-82	1.40546e-80	1975.81	2166.18	645.291	636.679	753.9
ENSG00000198873.12	GRK5	966.791	1571.67	563.539	-1.4781	1.3282e-81	2.66586e-80	1615.05	1528.29	514.095	592.452	584.069
ENSG00000146674.15	IGFBP3	512.599	902.796	252.467	-1.83742	1.46181e-81	2.93025e-80	867.837	937.756	237.125	273.652	246.623
ENSG00000134030.14	CTIF	1219.13	1863.59	789.495	-1.23779	1.68543e-81	3.36978e-80	1808.27	1918.91	810.501	758.302	799.68
ENSG00000104884.16	ERCC2	397.663	716.007	185.433	-1.94906	2.11672e-81	4.22118e-80	712.587	719.428	177.844	195.334	183.122
ENSG00000213977.8	TAX1BP3	1250.55	1889.04	824.893	-1.194	3.71405e-81	7.38757e-80	1892.04	1886.03	785.234	847.677	841.769
ENSG00000136848.17	DAB2IP	878.195	1401.06	529.616	-1.39966	6.52056e-81	1.29202e-79	1373.8	1428.33	503.405	527.955	557.487
ENSG00000164484.12	TMEM200A	536.868	991.95	233.48	-2.08152	1.23087e-80	2.4296e-79	1048.78	935.125	225.463	209.155	265.822
ENSG00000135916.16	ITM2C	955.893	1519.67	580.045	-1.38672	1.72052e-79	3.35339e-78	1445.28	1594.05	580.179	564.811	595.145
ENSG00000065361.16	ERBB3	190.57	418.551	38.5824	-3.42137	9.50531e-79	1.84567e-77	396.502	440.6	37.9011	31.3272	46.5188
ENSG00000188157.15	AGRN	1683.67	2748.68	973.661	-1.49657	1.35662e-78	2.63089e-77	2786.68	2710.68	1037.91	855.969	1027.11
ENSG00000197971.16	MBP	511.358	868.141	273.503	-1.66433	1.4808e-78	2.86813e-77	865.603	870.679	273.083	265.36	282.066
ENSG00000160932.11	LY6E	1001.23	2124.72	252.244	-3.07407	1.66632e-78	3.22343e-77	2400.23	1849.21	255.59	236.797	264.345
ENSG00000114166.8	KAT2B	226.54	461.562	69.8586	-2.72528	2.7616e-78	5.3289e-77	460.166	462.959	76.7741	62.6544	70.1474
ENSG00000116285.13	ERRFI1	1719.51	2773.68	1016.72	-1.44555	2.9453e-78	5.6763e-77	2542.08	3005.29	1004.87	988.649	1056.64
ENSG00000154529.15	CNTNAP3B	279.353	536.202	108.121	-2.31224	5.11219e-78	9.84018e-77	530.531	541.873	110.788	108.724	104.852
ENSG00000249669.10	CARMN	263.472	652.151	4.35239	-7.23595	5.17243e-78	9.94378e-77	646.689	657.613	2.91547	6.44971	3.69197
ENSG00000128268.12	MGAT3	195.859	418.055	47.7286	-3.13916	5.34602e-78	1.02648e-76	402.086	434.024	55.394	44.2266	43.5652
ENSG00000142156.15	COL6A1	13528	27083.2	4491.21	-2.59204	6.91328e-78	1.32412e-76	24042.5	30123.9	4418.88	4241.15	4813.59
ENSG00000011426.11	ANLN	198.84	432.095	43.3363	-3.32919	1.42996e-77	2.73209e-76	473.568	390.622	46.6476	44.2266	39.1349
ENSG00000064961.19	HMG20B	454.105	788.006	231.504	-1.76609	1.51605e-77	2.89301e-76	805.29	770.722	229.351	226.661	238.501
ENSG00000139132.15	FGD4	506.507	951.1	210.112	-2.17894	2.58016e-77	4.91754e-76	1005.22	896.984	236.153	174.142	220.041
ENSG00000128294.16	TPST2	524.765	931.627	253.524	-1.87161	3.21646e-77	6.12274e-76	950.488	912.766	222.548	258.91	279.113
ENSG00000124006.15	OBSL1	693.793	1174.96	373.019	-1.65197	3.47412e-77	6.60508e-76	1209.61	1140.3	372.209	339.992	406.855
ENSG00000237807.4	AC022034.1	187.328	398.264	46.7044	-3.08543	4.40141e-77	8.3476e-76	395.385	401.144	45.6757	44.2266	50.2108
ENSG00000231991.4	ANXA2P2	578.211	979.596	310.621	-1.6611	5.5849e-77	1.05792e-75	958.306	1000.89	323.617	322.486	285.758
ENSG00000116132.12	PRRX1	1476.27	2438.56	834.748	-1.54609	6.65564e-77	1.25921e-75	2628.08	2249.04	834.797	776.73	892.718
ENSG00000143867.7	OSR1	292.776	557.36	116.386	-2.25956	8.928e-77	1.68296e-75	566.272	548.449	108.844	124.387	115.928
ENSG00000179772.8	FOXS1	225.277	555.549	5.09489	-6.82346	1.18681e-76	2.23175e-75	571.856	539.242	6.80277	5.52833	2.95357
ENSG00000197635.11	DPP4	464.735	802.212	239.751	-1.74288	1.28458e-76	2.41267e-75	800.822	803.603	230.322	253.382	235.548
ENSG00000104812.15	GYS1	551.088	983.86	262.573	-1.90067	5.74345e-76	1.06836e-74	910.279	1057.44	238.097	276.416	273.206
ENSG00000225614.4	ZNF469	469.293	876.1	198.088	-2.14274	8.39147e-76	1.55906e-74	790.77	961.43	212.83	180.592	200.843
ENSG00000122367.20	LDB3	217.473	536.066	5.07808	-6.77142	1.75115e-75	3.23025e-74	539.466	532.666	5.83095	6.44971	2.95357
ENSG00000145555.15	MYO10	939.09	1469.69	585.355	-1.32705	2.08805e-75	3.84256e-74	1504.47	1434.91	591.841	552.833	611.39
ENSG00000152601.17	MBNL1	2284.02	3273.11	1624.62	-1.01098	2.75749e-75	5.06848e-74	3383.11	3163.12	1647.24	1571.89	1654.74
ENSG00000163017.14	ACTG2	647.083	1614.43	2.18567	-9.45234	3.6704e-75	6.73849e-74	1651.91	1576.96	1.94365	0.921388	3.69197
ENSG00000166448.15	TMEM130	212.072	522.444	5.15803	-6.65598	5.10537e-75	9.36185e-74	559.57	485.318	6.80277	2.76416	5.90715
ENSG00000152953.13	STK32B	178.027	381.015	42.7012	-3.15698	1.68732e-74	3.08677e-73	367.462	394.568	41.7884	44.2266	42.0884
ENSG00000211455.8	STK38L	602.284	994.889	340.547	-1.54487	2.57341e-74	4.69118e-73	1023.09	966.691	325.561	340.913	355.167
ENSG00000163710.9	PCOLCE2	198.75	426.97	46.6035	-3.19003	2.59073e-74	4.71721e-73	464.633	389.307	39.8448	49.7549	50.2108
ENSG00000123933.17	MXD4	907.572	1404.84	576.061	-1.28352	2.75497e-74	5.01037e-73	1390.55	1419.13	573.376	553.754	601.052
ENSG00000138411.13	HECW2	351.927	641.52	158.865	-2.01549	3.07395e-74	5.58393e-73	670.144	612.895	155.492	163.086	158.016
ENSG00000170340.11	B3GNT2	310.635	582.726	129.241	-2.17874	5.72179e-74	1.03574e-72	606.48	558.971	137.999	127.152	122.573
ENSG00000152284.5	TCF7L1	327.624	626.191	128.579	-2.27451	6.39458e-74	1.15617e-72	613.182	639.199	127.309	111.488	146.94
ENSG00000135048.14	CEMIP2	622.455	1039.14	344.664	-1.59398	1.09704e-73	1.97659e-72	1102.39	975.897	340.138	348.285	345.568
ENSG00000105137.13	SYDE1	841.753	1378.87	483.672	-1.50999	1.59071e-73	2.85609e-72	1438.58	1319.17	490.771	444.109	516.137
ENSG00000161714.12	PLCD3	510.828	863.538	275.688	-1.64601	1.78003e-73	3.19232e-72	865.603	861.473	285.716	257.067	284.282
ENSG00000172345.14	STARD5	169.088	372.294	33.6177	-3.48456	4.33468e-73	7.7291e-72	384.216	360.372	32.0702	41.4624	27.3206
ENSG00000146376.11	ARHGAP18	451.657	809.065	213.384	-1.91753	5.23251e-73	9.31928e-72	842.148	775.983	190.478	215.605	234.071
ENSG00000196937.11	FAM3C	1824.43	2843.03	1145.37	-1.31224	5.24483e-73	9.3305e-72	2960.92	2725.15	1064.15	1242.95	1129
ENSG00000125534.10	PPDPF	956.708	1463.98	618.528	-1.2417	1.59026e-72	2.80012e-71	1420.71	1507.25	630.714	601.666	623.204
ENSG00000115896.16	PLCL1	152.711	355.619	17.4389	-4.36226	2.49437e-72	4.38212e-71	394.268	316.969	20.4083	15.6636	16.2447
ENSG00000143924.19	EML4	730.29	1195.76	419.973	-1.50594	3.23234e-72	5.66574e-71	1219.66	1171.87	411.082	392.511	456.327
ENSG00000163947.12	ARHGEF3	139.827	329.022	13.6966	-4.57238	3.32002e-72	5.81285e-71	316.085	341.959	13.6055	11.978	15.5063
ENSG00000103196.12	CRISPLD2	199.436	491.207	4.92246	-6.64665	3.70435e-72	6.47113e-71	489.205	493.209	3.8873	6.44971	4.43036
ENSG00000187079.20	TEAD1	1589.01	2392.64	1053.26	-1.18484	3.75191e-72	6.54682e-71	2523.09	2262.19	1074.84	1017.21	1067.72
ENSG00000158828.8	PINK1	1066.35	1607.23	705.761	-1.18476	4.3174e-72	7.52509e-71	1584.89	1629.56	677.361	710.39	729.533
ENSG00000115468.12	EFHD1	345.955	647.855	144.689	-2.15487	1.71661e-71	2.98193e-70	621	674.711	124.393	153.872	155.801
ENSG00000178031.18	ADAMTSL1	144.342	337.012	15.8948	-4.42884	1.88026e-71	3.26255e-70	314.968	359.056	16.521	19.3491	11.8143
ENSG00000153179.13	RASSF3	529.793	910.249	276.155	-1.7227	1.88245e-71	3.2627e-70	961.657	858.842	291.547	257.067	279.851
ENSG00000198948.12	MFAP3L	267.086	531.938	90.5185	-2.55216	4.12079e-71	7.11042e-70	578.558	485.318	80.6614	94.9029	95.9912
ENSG00000176463.14	SLCO3A1	370.831	654.807	181.514	-1.85092	7.28653e-71	1.25589e-69	661.209	648.406	185.618	175.064	183.86
ENSG00000087077.14	TRIP6	457.656	782.703	240.958	-1.6961	3.75865e-70	6.4212e-69	753.912	811.494	232.266	243.246	247.362
ENSG00000067141.17	NEO1	1021.08	1653	599.798	-1.46015	4.1876e-70	7.14614e-69	1721.15	1584.85	590.869	552.833	655.694
ENSG00000105245.9	NUMBL	396.601	693.372	198.753	-1.79941	5.34129e-70	9.10488e-69	671.261	715.483	194.365	198.098	203.797
ENSG00000137106.18	GRHPR	409.52	710.819	208.653	-1.76608	6.40403e-70	1.08925e-68	696.95	724.689	198.252	216.526	211.181
ENSG00000125520.14	SLC2A4RG	238.964	486.228	74.1207	-2.70518	9.37244e-70	1.59065e-68	448.997	523.46	77.7459	62.6544	81.9617
ENSG00000151348.15	EXT2	1070.77	1714.78	641.427	-1.41666	1.3636e-69	2.30164e-68	1788.17	1641.4	634.601	593.374	696.305
ENSG00000240972.2	MIF	1354.95	1986.4	933.986	-1.0873	3.72148e-69	6.23399e-68	2024.95	1947.85	908.656	918.624	974.68
ENSG00000176928.7	GCNT4	285.34	548.702	109.766	-2.32992	9.19519e-69	1.53039e-67	589.727	507.677	113.703	115.173	100.422
ENSG00000162654.9	GBP4	140.074	329.659	13.6839	-4.60492	1.11522e-68	1.85213e-67	360.761	298.556	16.521	11.978	12.5527
ENSG00000166311.10	SMPD1	1108.35	1637.93	755.303	-1.11626	2.54461e-68	4.21247e-67	1668.66	1607.21	734.699	761.066	770.145
ENSG00000213694.6	S1PR3	506.837	844.738	281.57	-1.58187	5.98057e-68	9.87941e-67	847.732	841.744	280.857	266.281	297.573
ENSG00000103202.13	NME4	489.535	833.12	260.478	-1.67153	8.24342e-68	1.35885e-66	800.822	865.418	251.702	250.617	279.113
ENSG00000129009.13	ISLR	152.669	354.246	18.2846	-4.26301	1.23906e-67	2.03382e-66	306.032	402.459	19.4365	14.7422	20.675
ENSG00000137478.15	FCHSD2	619.153	994.763	368.746	-1.43188	1.48872e-67	2.43845e-66	1009.68	979.843	381.927	349.206	375.104
ENSG00000184014.9	DENND5A	1386.02	2032.35	955.138	-1.0867	1.94135e-67	3.16979e-66	1981.39	2083.32	944.613	923.231	997.57
ENSG00000125170.11	DOK4	359.872	641.765	171.943	-1.89365	2.19099e-67	3.57363e-66	637.754	645.776	161.323	167.693	186.814
ENSG00000111907.21	TPD52L1	425.003	725.6	224.604	-1.69516	3.01858e-67	4.91312e-66	730.457	720.743	225.463	234.954	213.396
ENSG00000107957.16	SH3PXD2A	1484.35	2170.08	1027.2	-1.07834	4.53811e-67	7.34775e-66	2081.91	2258.24	1058.32	1004.31	1018.98
ENSG00000171385.10	KCND3	149.562	335.29	25.7438	-3.73154	5.21151e-67	8.42927e-66	341.773	328.806	28.1829	31.3272	17.7214
ENSG00000253368.4	TRNP1	242.204	479.229	84.1865	-2.50329	5.37233e-67	8.68032e-66	438.944	519.514	80.6614	84.7677	87.1305
ENSG00000138356.14	AOX1	555.421	954.117	289.624	-1.7262	5.49728e-67	8.87296e-66	1023.09	885.147	307.096	293.001	268.775
ENSG00000154511.12	DIPK1A	539.994	884.472	310.341	-1.50806	7.28109e-67	1.17399e-65	889.058	879.886	306.125	298.53	326.37
ENSG00000183023.18	SLC8A1	302.949	552.929	136.295	-2.01602	7.42074e-67	1.19526e-65	549.518	556.34	133.14	131.758	143.987
ENSG00000125965.9	GDF5	252.564	486.181	96.8186	-2.32207	2.97635e-66	4.7643e-65	479.153	493.209	100.098	84.7677	105.59
ENSG00000138385.16	SSB	1483.93	2123.62	1057.47	-1.00592	3.02735e-66	4.84095e-65	2153.4	2093.84	1020.42	1090.92	1061.07
ENSG00000160014.17	CALM3	1521.12	2193.95	1072.56	-1.03318	3.20277e-66	5.11617e-65	2161.21	2226.68	1059.29	1123.17	1035.23
ENSG00000004478.8	FKBP4	488.16	814.879	270.348	-1.58915	4.99952e-66	7.96991e-65	784.069	845.69	261.421	276.416	273.206
ENSG00000122870.12	BICC1	678.389	1103.82	394.77	-1.48472	6.01046e-66	9.56181e-65	1173.87	1033.77	379.983	406.332	397.994
ENSG00000241553.13	ARPC4	1107.01	1633.42	756.068	-1.1124	7.93906e-66	1.2617e-64	1608.35	1658.5	758.995	780.415	728.795
ENSG00000104723.21	TUSC3	815.565	1254.06	523.233	-1.26033	1.24557e-65	1.97544e-64	1288.91	1219.21	504.377	527.034	538.289
ENSG00000175115.13	PACS1	822.252	1256.97	532.438	-1.24143	1.62031e-65	2.56191e-64	1248.7	1265.25	540.334	548.226	508.753
ENSG00000169499.15	PLEKHA2	373.47	670.867	175.205	-1.9456	2.64647e-65	4.17586e-64	702.534	639.199	187.562	181.513	156.539
ENSG00000133392.18	MYH11	562.217	1399.16	4.25131	-8.42111	3.23946e-65	5.10635e-64	1217.43	1580.9	7.77459	2.76416	2.21518
ENSG00000143333.7	RGS16	128.998	306.068	10.9514	-4.80559	5.52075e-65	8.69349e-64	322.786	289.35	7.77459	14.7422	10.3375
ENSG00000100979.15	PLTP	397.461	684.129	206.349	-1.73186	6.60067e-65	1.03835e-63	679.079	689.178	204.083	219.29	195.674
ENSG00000074657.14	ZNF532	938.639	1420.47	617.418	-1.20036	8.10655e-65	1.27265e-63	1362.63	1478.31	609.334	625.622	617.297
ENSG00000210135.1	MT-TN	261.933	635.293	13.0257	-5.59146	1.29071e-64	2.0222e-63	695.833	574.753	6.80277	17.5064	14.7679
ENSG00000162692.12	VCAM1	246.781	474.631	94.8811	-2.32995	1.33277e-64	2.08599e-63	498.14	451.122	95.2388	102.274	87.1305
ENSG00000124172.10	ATP5F1E	906.996	1377.93	593.042	-1.21562	1.78841e-64	2.79631e-63	1419.59	1336.27	567.545	601.666	609.913
ENSG00000109501.14	WFS1	335.778	609.281	153.443	-1.98984	2.39873e-64	3.7468e-63	633.286	585.275	165.21	136.365	158.755
ENSG00000135269.18	TES	574.687	914.973	347.829	-1.39633	2.43361e-64	3.79746e-63	915.864	914.082	352.772	347.363	343.353
ENSG00000130702.15	LAMA5	3214.55	4742.32	2196.04	-1.10985	3.67345e-64	5.72637e-63	4507.84	4976.81	2289.62	2046.4	2252.1
ENSG00000185885.17	IFITM1	307.633	626.896	94.7909	-2.72572	3.85667e-64	6.00594e-63	723.756	530.036	82.6051	105.038	96.7296
ENSG00000142949.17	PTPRF	1886.38	2795.47	1280.32	-1.12425	7.1103e-64	1.10506e-62	2644.84	2946.1	1276.98	1224.52	1339.45
ENSG00000214357.9	NEURL1B	153.336	329.048	36.1948	-3.17268	7.50523e-64	1.16527e-62	330.604	327.491	34.9857	32.2486	41.35
ENSG00000087245.13	MMP2	1269.66	1945.15	819.343	-1.24361	9.77655e-64	1.51488e-62	1926.66	1963.63	760.938	804.372	892.718
ENSG00000175130.7	MARCKSL1	192.753	392.335	59.6982	-2.72351	1.08738e-63	1.68322e-62	417.723	366.948	65.1122	57.126	56.8563
ENSG00000172935.9	MRGPRF	307.568	582.319	124.401	-2.22342	1.47937e-63	2.28315e-62	633.286	531.351	120.506	116.095	136.603
ENSG00000106819.13	ASPN	907.364	1388.95	586.306	-1.24069	3.39647e-63	5.22625e-62	1332.47	1445.43	561.714	588.767	608.436
ENSG00000105355.9	PLIN3	1245.36	1852.35	840.705	-1.13944	4.15378e-63	6.37256e-62	1883.1	1821.59	874.642	781.337	866.136
ENSG00000120837.8	NFYB	529.307	864.08	306.125	-1.49735	5.14245e-63	7.88152e-62	829.862	898.299	311.956	309.586	296.834
ENSG00000196843.17	ARID5A	257.642	491.171	101.956	-2.25832	6.12647e-63	9.37114e-62	497.024	485.318	91.3515	98.5885	115.928
ENSG00000006042.12	TMEM98	507.894	833.245	290.993	-1.51407	7.64232e-63	1.16668e-61	814.225	852.266	275.026	296.687	301.265
ENSG00000198542.14	ITGBL1	196.97	398.056	62.9128	-2.66002	8.52071e-63	1.29949e-61	419.957	376.154	55.394	69.1041	64.2402
ENSG00000114270.18	COL7A1	310.631	621.394	103.455	-2.59068	1.76433e-62	2.68285e-61	533.881	708.906	107.872	112.409	90.084
ENSG00000143153.13	ATP1B1	294.42	535.346	133.802	-2.00025	1.88813e-62	2.86829e-61	532.765	537.927	124.393	145.579	131.434
ENSG00000114948.13	ADAM23	382.457	665.574	193.713	-1.78072	2.15628e-62	3.26923e-61	628.819	702.33	198.252	195.334	187.552
ENSG00000166482.12	MFAP4	521.194	913.944	259.361	-1.80981	2.27073e-62	3.43916e-61	934.851	893.038	236.153	241.404	300.526
ENSG00000154556.18	SORBS2	342.724	623.644	155.444	-1.99778	3.01977e-62	4.56056e-61	575.207	672.08	145.774	156.636	163.923
ENSG00000221869.5	CEBPD	475.892	851.157	225.715	-1.90983	3.86198e-62	5.81549e-61	760.613	941.701	210.886	232.19	234.071
ENSG00000106333.13	PCOLCE	650.495	1155	314.156	-1.87176	4.46054e-62	6.7103e-61	1197.32	1112.68	273.083	299.451	369.935
ENSG00000013583.10	HEBP1	638.806	1003.41	395.736	-1.34024	5.92927e-62	8.90253e-61	1008.57	998.256	375.124	404.489	407.593
ENSG00000122861.16	PLAU	367.848	659.886	173.157	-1.92569	9.74009e-62	1.45819e-60	700.301	619.471	160.351	168.614	190.506
ENSG00000139567.13	ACVRL1	198.951	391.031	70.8979	-2.46364	1.25751e-61	1.87718e-60	395.385	386.676	72.8868	68.1827	71.6242
ENSG00000118898.16	PPL	154.233	327.012	39.0473	-3.06134	1.81763e-61	2.70549e-60	323.903	330.122	33.042	44.2266	39.8733
ENSG00000198420.10	TCAF1	1489.66	2129.19	1063.31	-1.00427	2.39024e-61	3.5408e-60	2186.9	2071.48	1078.72	1090	1021.2
ENSG00000099860.9	GADD45B	272.796	510.054	114.623	-2.15461	2.42402e-61	3.58741e-60	476.919	543.188	113.703	121.623	108.544
ENSG00000138792.10	ENPEP	137.068	298.349	29.5472	-3.34197	3.38681e-61	5.00272e-60	306.032	290.665	31.0984	29.4844	28.059
ENSG00000170899.11	GSTA4	192.549	385.978	63.5962	-2.60673	3.65654e-61	5.38575e-60	370.813	401.144	63.1686	70.0255	57.5947
ENSG00000100100.13	PIK3IP1	213.497	421.009	75.1559	-2.48057	3.74446e-61	5.51001e-60	413.255	428.763	63.1686	84.7677	77.5313
ENSG00000132780.17	NASP	267.271	495.153	115.349	-2.10808	5.41502e-61	7.95315e-60	489.205	501.101	127.309	112.409	106.329
ENSG00000103222.20	ABCC1	1090.56	1594.18	754.809	-1.07737	7.91936e-61	1.15983e-59	1561.44	1626.93	727.896	780.415	756.115
ENSG00000128791.12	TWSG1	1125.86	1693.55	747.406	-1.181	1.04648e-60	1.52973e-59	1768.06	1619.04	775.516	703.94	762.761
ENSG00000115457.10	IGFBP2	118.08	271.632	15.7118	-4.12283	1.06789e-60	1.55956e-59	273.642	269.621	16.521	16.585	14.0295
ENSG00000171148.13	TADA3	794.419	1194.88	527.444	-1.17891	1.2317e-60	1.7971e-59	1207.38	1182.39	517.01	527.034	538.289
ENSG00000254087.8	LYN	329.917	603.153	147.76	-2.03011	1.26845e-60	1.84724e-59	657.858	548.449	145.774	144.658	152.847
ENSG00000153253.19	SCN3A	1076.63	1742.69	632.596	-1.46618	1.62416e-60	2.3586e-59	1888.69	1596.68	667.643	646.814	583.331
ENSG00000120885.22	CLU	759.038	1250.74	431.234	-1.53749	4.00814e-60	5.78809e-59	1355.92	1145.56	402.335	457.93	433.437
ENSG00000127334.11	DYRK2	474.982	787.635	266.546	-1.56624	5.27449e-60	7.60263e-59	824.277	750.994	279.885	256.146	263.607
ENSG00000222041.11	CYTOR	554.647	891.173	330.296	-1.43649	2.93234e-59	4.19544e-58	902.461	879.886	338.195	345.52	307.172
ENSG00000011454.18	RABGAP1	958.478	1404.66	661.025	-1.08761	3.12398e-59	4.4655e-58	1429.64	1379.67	667.643	644.971	670.461
ENSG00000130202.10	NECTIN2	804.646	1307.99	469.082	-1.47492	3.29942e-59	4.71193e-58	1207.38	1408.61	464.532	441.345	501.369
ENSG00000007866.22	TEAD3	730.145	1131.02	462.895	-1.28545	5.13945e-59	7.29934e-58	1082.28	1179.76	445.095	468.065	475.526
ENSG00000104870.13	FCGRT	353.845	623.973	173.76	-1.84039	5.51988e-59	7.811e-58	645.572	602.373	173.957	157.557	189.767
ENSG00000197614.11	MFAP5	200.685	417.038	56.45	-2.90467	8.6917e-59	1.22434e-57	398.736	435.34	66.084	62.6544	40.6117
ENSG00000117226.12	GBP3	487.017	817.541	266.668	-1.61923	1.04697e-58	1.47213e-57	857.784	777.298	251.702	292.08	256.223
ENSG00000019144.19	PHLDB1	1003.19	1477.13	687.232	-1.10212	1.7897e-58	2.50963e-57	1420.71	1533.55	676.39	695.648	689.66
ENSG00000246859.3	STARD4-AS1	127.723	282.054	24.8352	-3.51904	3.53756e-58	4.9427e-57	274.759	289.35	25.2674	28.563	20.675
ENSG00000157240.4	FZD1	333.079	583.78	165.946	-1.81394	8.12597e-58	1.12723e-56	602.013	565.547	152.576	176.906	168.354
ENSG00000065485.20	PDIA5	545.518	904.493	306.202	-1.56141	8.6393e-58	1.1963e-56	967.241	841.744	290.575	303.137	324.893
ENSG00000183688.4	RFLNB	215.932	412.648	84.7881	-2.28521	1.42278e-57	1.96663e-56	433.36	391.937	83.5769	86.6104	84.1769
ENSG00000162849.16	KIF26B	114.019	261.705	15.5625	-4.07219	1.67316e-57	2.31066e-56	266.941	256.469	18.4647	11.978	16.2447
ENSG00000125744.12	RTN2	127.787	282.947	24.3472	-3.52974	1.77885e-57	2.45443e-56	264.707	301.187	25.2674	21.1919	26.5822
ENSG00000135299.17	ANKRD6	138.956	316.407	20.6552	-3.9643	2.57234e-57	3.54297e-56	361.878	270.936	25.2674	21.1919	15.5063
ENSG00000171055.15	FEZ2	387.277	654.176	209.345	-1.64214	2.8249e-57	3.88738e-56	675.729	632.623	206.027	202.705	219.303
ENSG00000111913.20	RIPOR2	111.007	256.814	13.8018	-4.21346	3.81424e-57	5.24416e-56	247.953	265.675	12.6337	14.7422	14.0295
ENSG00000162430.17	SELENON	924.942	1399.47	608.591	-1.19887	3.98234e-57	5.47042e-56	1414	1384.93	609.334	566.653	649.786
ENSG00000154447.15	SH3RF1	706.034	1088.52	451.043	-1.27232	5.25045e-57	7.19962e-56	1049.89	1127.15	464.532	458.851	429.745
ENSG00000088325.16	TPX2	531.788	844.837	323.089	-1.38799	8.77048e-57	1.1984e-55	846.615	843.059	340.138	308.665	320.463
ENSG00000258947.8	TUBB3	138.338	297.9	31.9644	-3.20819	1.47433e-56	2.01275e-55	281.461	314.339	32.0702	27.6416	36.1813
ENSG00000137727.12	ARHGAP20	137.266	291.71	34.3035	-3.08899	1.53963e-56	2.0982e-55	299.331	284.089	35.9575	32.2486	34.7045
ENSG00000115363.14	EVA1A	226.731	425.999	93.886	-2.18949	2.68078e-56	3.64374e-55	431.126	420.872	98.1542	98.5885	84.9153
ENSG00000148842.18	CNNM2	493.113	807.948	283.223	-1.51628	3.39054e-56	4.60039e-55	839.914	775.983	306.125	268.124	275.421
ENSG00000182809.11	CRIP2	458.226	748.815	264.499	-1.49981	3.58119e-56	4.85482e-55	728.223	769.407	275.026	249.696	268.775
ENSG00000240583.14	AQP1	129.066	285.296	24.9131	-3.5005	5.7998e-56	7.82821e-55	304.916	265.675	22.352	22.1133	30.2741
ENSG00000177565.18	TBL1XR1	918.686	1351.68	630.023	-1.1012	6.03495e-56	8.13144e-55	1367.09	1336.27	602.531	656.949	630.588
ENSG00000182541.18	LIMK2	161.49	327.174	51.0335	-2.68099	6.90612e-56	9.29716e-55	329.487	324.861	54.4222	46.9908	51.6876
ENSG00000095303.17	PTGS1	500.009	1167.05	55.3166	-4.39064	8.54653e-56	1.14955e-54	1172.75	1161.34	56.3658	38.6983	70.8858
ENSG00000164099.3	PRSS12	840.368	1241.72	572.797	-1.11797	1.54486e-55	2.07432e-54	1235.3	1248.15	595.728	566.653	556.01
ENSG00000117632.23	STMN1	248.473	465.425	103.838	-2.1672	1.82094e-55	2.44289e-54	498.14	432.709	111.76	94.9029	104.852
ENSG00000034510.6	TMSB10	6323.03	9232.37	4383.47	-1.07441	1.91137e-55	2.562e-54	9205.55	9259.19	3989.34	4765.42	4395.66
ENSG00000118495.20	PLAGL1	631.219	999.393	385.769	-1.37757	1.92248e-55	2.57466e-54	1024.2	974.582	421.772	368.555	366.982
ENSG00000197555.9	SIPA1L1	693.83	1099.2	423.585	-1.37432	2.02535e-55	2.71009e-54	1137.01	1061.39	435.377	384.219	451.159
ENSG00000233369.7	GTF2IP4	1096.5	1756.53	656.478	-1.42306	2.11039e-55	2.82143e-54	1680.94	1832.11	713.319	680.906	575.209
ENSG00000141448.11	GATA6	848.75	1312.04	539.888	-1.28029	2.11635e-55	2.82697e-54	1265.46	1358.63	579.207	494.785	545.673
ENSG00000176454.14	LPCAT4	198.037	384.12	73.9819	-2.37709	4.40403e-55	5.86258e-54	406.554	361.687	69.9713	77.3966	74.5778
ENSG00000051523.11	CYBA	221.329	424.684	85.7599	-2.30442	4.9453e-55	6.57747e-54	431.126	418.242	93.2951	70.9469	93.0376
ENSG00000118194.20	TNNT2	321.375	800.553	1.92272	-8.63383	1.15727e-54	1.53265e-53	834.329	766.776	0.971824	1.84278	2.95357
ENSG00000169992.10	NLGN2	411.649	690.418	225.804	-1.60626	1.34753e-54	1.78157e-53	660.092	720.743	215.745	220.212	241.455
ENSG00000149131.17	SERPING1	212.208	407.821	81.7989	-2.31227	4.98023e-54	6.53972e-53	421.074	394.568	84.5487	70.0255	90.8224
ENSG00000138623.10	SEMA7A	117.348	258.652	23.146	-3.47235	6.41827e-54	8.3925e-53	256.889	260.415	23.3238	20.2705	25.8438
ENSG00000126351.13	THRA	323.065	614.771	128.594	-2.24585	1.18688e-53	1.54674e-52	564.038	665.504	124.393	107.802	153.586
ENSG00000184900.16	SUMO3	587.875	915.567	369.413	-1.30558	1.43871e-53	1.86863e-52	909.162	921.973	359.575	356.577	392.087
ENSG00000163872.16	YEATS2	582.761	900.578	370.883	-1.28183	1.67133e-53	2.16532e-52	900.227	900.929	388.73	362.105	361.813
ENSG00000105894.12	PTN	458.846	1006	94.0757	-3.41264	1.84171e-53	2.38406e-52	1097.92	914.082	90.3797	77.3966	114.451
ENSG00000107338.10	SHB	485.05	809.305	268.88	-1.58371	2.91618e-53	3.75925e-52	750.561	868.049	250.731	270.888	285.02
ENSG00000102935.12	ZNF423	122.206	266.172	26.2277	-3.3559	3.28891e-53	4.2327e-52	275.876	256.469	31.0984	23.9561	23.6286
ENSG00000111859.17	NEDD9	283.777	497.522	141.28	-1.81515	3.48439e-53	4.48055e-52	484.738	510.307	140.915	141.894	141.033
ENSG00000164543.7	STK17A	481.052	772.244	286.924	-1.42494	3.99196e-53	5.12048e-52	760.613	783.874	267.252	296.687	296.834
ENSG00000115183.15	TANC1	802.708	1200.5	537.512	-1.16097	9.75392e-53	1.24393e-51	1210.73	1190.28	520.898	574.025	517.614
ENSG00000244274.8	DBNDD2	392.681	649.15	221.702	-1.55193	1.58598e-52	2.01432e-51	665.676	632.623	213.801	234.954	216.349
ENSG00000126458.4	RRAS	966.089	1410.28	669.96	-1.07193	1.74431e-52	2.21179e-51	1351.46	1469.11	655.01	683.67	671.2
ENSG00000107738.20	VSIR	620.279	978.631	381.379	-1.35461	2.02589e-52	2.56464e-51	983.995	973.267	361.519	363.948	418.669
ENSG00000160211.19	G6PD	1134.32	1623.67	808.089	-1.005	2.27713e-52	2.87799e-51	1644.09	1603.26	800.783	775.808	847.676
ENSG00000065809.14	FAM107B	240.045	443.989	104.083	-2.08406	2.75022e-52	3.46179e-51	421.074	466.905	97.1824	101.353	113.713
ENSG00000111339.12	ART4	111.928	271.83	5.32635	-5.63629	2.75303e-52	3.46251e-51	271.408	272.252	5.83095	2.76416	7.38394
ENSG00000116117.18	PARD3B	542.706	862.463	329.534	-1.39153	3.21679e-52	4.04251e-51	914.747	810.179	336.251	328.935	323.416
ENSG00000170271.11	FAXDC2	184.164	358.458	67.9678	-2.39149	3.31188e-52	4.15864e-51	369.696	347.219	63.1686	65.4185	75.3162
ENSG00000180304.14	OAZ2	746.973	1117.02	500.277	-1.15732	7.27074e-52	9.10018e-51	1143.71	1090.32	481.053	498.471	521.306
ENSG00000120820.13	GLT8D2	223.398	425.754	88.4945	-2.26928	1.02553e-51	1.2815e-50	463.516	387.991	95.2388	80.1607	90.084
ENSG00000163346.17	PBXIP1	704.872	1102.84	439.562	-1.32315	1.12486e-51	1.40335e-50	1021.97	1183.7	428.574	436.738	453.374
ENSG00000105854.13	PON2	322.625	565.528	160.689	-1.81578	1.20852e-51	1.50531e-50	607.597	523.46	150.633	166.771	164.662
ENSG00000189403.15	HMGB1	1034.69	1500.75	723.989	-1.05282	1.61298e-51	2.00587e-50	1532.4	1469.11	694.854	767.516	709.596
ENSG00000104805.16	NUCB1	2336.23	3382.34	1638.83	-1.0435	1.61977e-51	2.0127e-50	3389.81	3374.87	1491.75	1662.18	1762.55
ENSG00000149547.15	EI24	1100.23	1582.96	778.412	-1.02568	2.05677e-51	2.55161e-50	1591.59	1574.32	827.994	744.481	762.761
ENSG00000163754.18	GYG1	734.974	1094.18	495.501	-1.14466	3.03334e-51	3.75712e-50	1104.62	1083.75	486.884	519.663	479.956
ENSG00000112658.8	SRF	437.494	702.704	260.688	-1.42793	3.20985e-51	3.97258e-50	684.664	720.743	253.646	262.596	265.822
ENSG00000142303.14	ADAMTS10	205.971	418.337	64.3935	-2.70432	4.95679e-51	6.11022e-50	361.878	474.796	63.1686	74.6324	55.3795
ENSG00000113389.16	NPR3	183.738	377.534	54.5403	-2.78701	8.60817e-51	1.05944e-49	428.892	326.176	54.4222	47.9122	61.2867
ENSG00000133243.10	BTBD2	618.648	952.634	395.99	-1.26264	9.13781e-51	1.12373e-49	958.306	946.962	375.124	389.747	423.1
ENSG00000148516.22	ZEB1	763.509	1133.97	516.533	-1.13179	9.8627e-51	1.20904e-49	1093.45	1174.5	515.067	505.842	528.69
ENSG00000198756.12	COLGALT2	162.793	338.531	45.6338	-2.87889	9.91431e-51	1.21441e-49	371.93	305.132	36.9293	46.0694	53.9027
ENSG00000136237.19	RAPGEF5	196.234	373.061	78.3489	-2.2525	1.09628e-50	1.34071e-49	360.761	385.361	73.8586	86.6104	74.5778
ENSG00000148671.14	ADIRF	199.076	403.238	62.9674	-2.68554	1.12028e-50	1.36899e-49	376.398	430.079	55.394	81.0821	52.426
ENSG00000169908.12	TM4SF1	366.795	685.131	154.571	-2.14805	2.20635e-50	2.68768e-49	786.302	583.96	137.999	164.007	161.708
ENSG00000054277.14	OPN3	178.296	342.028	69.1414	-2.3103	3.35725e-50	4.08004e-49	347.358	336.698	70.9432	70.0255	66.4554
ENSG00000189159.16	JPT1	259.774	459.616	126.547	-1.86009	5.80508e-50	7.03282e-49	474.685	444.546	120.506	129.916	129.219
ENSG00000176788.9	BASP1	792.965	1318.13	442.857	-1.56812	5.85598e-50	7.08894e-49	1189.51	1446.75	418.856	416.467	493.247
ENSG00000274180.1	NATD1	367.696	611.676	205.043	-1.57925	8.22817e-50	9.92955e-49	643.338	580.014	209.914	199.941	205.273
ENSG00000138172.11	CALHM2	419.407	710.506	225.341	-1.64935	9.3651e-50	1.12928e-48	663.443	757.57	203.111	228.504	244.408
ENSG00000173786.17	CNP	733.108	1117.18	477.061	-1.22467	1.08478e-49	1.30603e-48	1149.3	1085.06	446.067	472.672	512.445
ENSG00000205213.14	LGR4	171.172	337.55	60.2538	-2.48404	1.13171e-49	1.36043e-48	360.761	314.339	54.4222	63.5758	62.7635
ENSG00000153048.11	CARHSP1	322.482	565.069	160.757	-1.82187	1.18131e-49	1.41895e-48	605.363	524.775	172.985	163.086	146.202
ENSG00000100911.16	PSME2	519.912	826.08	315.8	-1.39056	1.24494e-49	1.49421e-48	880.123	772.037	316.815	319.722	310.864
ENSG00000087111.21	PIGS	532.117	845.343	323.3	-1.38114	1.3869e-49	1.66203e-48	818.693	871.994	315.843	304.058	349.999
ENSG00000213366.13	GSTM2	136.594	283.521	38.6432	-2.88506	1.6981e-49	2.03338e-48	302.682	264.36	41.7884	38.6983	35.4429
ENSG00000206190.12	ATP10A	487.234	764.092	302.663	-1.3355	1.70385e-49	2.0387e-48	756.146	772.037	313.899	288.394	305.695
ENSG00000152518.8	ZFP36L2	817.318	1210.11	555.459	-1.11975	1.86471e-49	2.22089e-48	1206.26	1213.95	529.644	544.54	592.192
ENSG00000107104.20	KANK1	417.749	700.538	229.224	-1.61409	1.93001e-49	2.29689e-48	746.094	654.982	246.843	208.234	232.594
ENSG00000147408.14	CSGALNACT1	311.962	532.183	165.148	-1.68913	2.47868e-49	2.93857e-48	546.167	518.199	173.957	153.872	167.615
ENSG00000092969.12	TGFB2	660.715	992.091	439.797	-1.17196	3.19183e-49	3.77825e-48	958.306	1025.88	446.067	430.288	443.036
ENSG00000149557.14	FEZ1	481.662	783.449	280.47	-1.48005	4.07773e-49	4.81222e-48	775.133	791.766	249.759	309.586	282.066
ENSG00000163041.13	H3-3A	1014.56	1452.73	722.444	-1.01	5.88957e-49	6.93984e-48	1495.54	1409.92	712.347	752.774	702.212
ENSG00000110427.17	KIAA1549L	111.396	244.445	22.6958	-3.44084	8.46353e-49	9.9501e-48	261.356	227.534	22.352	25.7989	19.9366
ENSG00000140391.15	TSPAN3	2042.74	2938.79	1445.37	-1.02433	1.13182e-48	1.32759e-47	3156.38	2721.2	1417.89	1428.15	1490.08
ENSG00000065882.16	TBC1D1	884.073	1278.05	621.423	-1.04244	2.16169e-48	2.52414e-47	1322.42	1233.68	638.489	609.959	615.82
ENSG00000153721.19	CNKSR3	250.211	474.224	100.868	-2.2296	3.22348e-48	3.74702e-47	524.946	423.503	85.5205	107.802	109.282
ENSG00000100504.17	PYGL	411.757	659.484	246.606	-1.42031	3.66482e-48	4.25047e-47	645.572	673.395	253.646	246.932	239.24
ENSG00000164050.13	PLXNB1	500.982	784.024	312.287	-1.33232	3.70713e-48	4.29633e-47	813.108	754.939	323.617	314.193	299.049
ENSG00000241852.10	C8orf58	194.439	362.043	82.7033	-2.13338	3.95924e-48	4.57824e-47	366.345	357.741	87.4642	80.1607	80.4849
ENSG00000115525.18	ST3GAL5	102.227	229.8	17.178	-3.73278	4.07977e-48	4.7141e-47	218.914	240.686	19.4365	12.8994	19.1982
ENSG00000167535.8	CACNB3	156.905	315.222	51.3596	-2.62101	5.37111e-48	6.19698e-47	293.746	336.698	48.5912	58.9688	46.5188
ENSG00000052795.13	FNIP2	784.254	1145.01	543.752	-1.07354	5.58564e-48	6.4397e-47	1124.73	1165.29	525.757	565.732	539.766
ENSG00000119950.21	MXI1	295.596	517.846	147.429	-1.80724	5.70559e-48	6.57309e-47	478.036	557.655	140.915	149.265	152.109
ENSG00000186318.17	BACE1	863.971	1296.3	575.755	-1.16608	8.03988e-48	9.24854e-47	1257.64	1334.95	544.222	558.361	624.681
ENSG00000013588.9	GPRC5A	430.249	695.809	253.209	-1.45835	1.06269e-47	1.21974e-46	732.691	658.928	254.618	241.404	263.607
ENSG00000210144.1	MT-TY	93.2241	217.864	10.1309	-4.43197	1.17824e-47	1.35135e-46	220.031	215.697	13.6055	6.44971	10.3375
ENSG00000144063.4	MALL	97.4612	221.846	14.5381	-3.93973	1.25078e-47	1.43349e-46	212.212	231.48	12.6337	18.4278	12.5527
ENSG00000107249.23	GLIS3	187.097	353.296	76.2978	-2.21834	1.28468e-47	1.47126e-46	368.579	338.013	79.6896	78.318	70.8858
ENSG00000136044.12	APPL2	464.935	758.074	269.509	-1.48631	1.35311e-47	1.54848e-46	757.263	758.885	237.125	278.259	293.142
ENSG00000133142.18	TCEAL4	973.358	1472.69	640.472	-1.19825	1.39038e-47	1.58996e-46	1426.29	1519.09	573.376	682.748	665.293
ENSG00000196405.13	EVL	152.19	302.566	51.9402	-2.53634	3.57667e-47	4.0601e-46	288.162	316.969	53.4503	46.9908	55.3795
ENSG00000006607.14	FARP2	420.236	687.422	242.113	-1.50813	3.62208e-47	4.10864e-46	738.275	636.569	245.872	236.797	243.67
ENSG00000165092.13	ALDH1A1	184.868	354.178	71.9939	-2.30037	3.69689e-47	4.19044e-46	380.865	327.491	75.8023	66.3399	73.8394
ENSG00000170153.11	RNF150	140.784	283.829	45.4211	-2.64589	4.40391e-47	4.98455e-46	276.993	290.665	42.7603	50.6763	42.8268
ENSG00000127946.17	HIP1	263.847	472.794	124.548	-1.9189	6.40303e-47	7.22089e-46	489.205	456.383	125.365	108.724	139.556
ENSG00000111452.13	ADGRD1	449.745	744.133	253.487	-1.55065	6.60533e-47	7.44361e-46	684.664	803.603	267.252	234.032	259.176
ENSG00000124788.19	ATXN1	811.774	1207.79	547.764	-1.14233	1.60571e-46	1.79902e-45	1239.77	1175.81	586.982	507.685	548.626
ENSG00000164465.19	DCBLD1	397.961	636.467	238.958	-1.41197	1.64631e-46	1.84318e-45	645.572	627.362	230.322	241.404	245.147
ENSG00000139083.11	ETV6	219.016	409.026	92.3423	-2.14346	1.65157e-46	1.84773e-45	444.529	373.524	86.4924	89.3746	101.16
ENSG00000104368.19	PLAT	6119.44	11863.4	2290.1	-2.37259	1.67529e-46	1.87292e-45	11628.1	12098.8	2208.96	1984.67	2676.68
ENSG00000129474.16	AJUBA	843.447	1208.69	599.951	-1.01199	1.83911e-46	2.05458e-45	1207.38	1210.01	598.644	620.094	581.116
ENSG00000197381.16	ADARB1	269.075	465.769	137.946	-1.75782	2.08473e-46	2.3273e-45	464.633	466.905	133.14	149.265	131.434
ENSG00000101400.6	SNTA1	331.612	575.7	168.886	-1.7626	2.10284e-46	2.34582e-45	581.908	569.493	169.097	145.579	191.982
ENSG00000131067.17	GGT7	180.472	341.433	73.1655	-2.22664	2.63611e-46	2.93649e-45	354.059	328.806	79.6896	68.1827	71.6242
ENSG00000240771.8	ARHGEF25	455.643	737.943	267.443	-1.45742	3.03449e-46	3.37783e-45	702.534	773.352	252.674	257.989	291.666
ENSG00000196557.13	CACNA1H	575.207	876.58	374.291	-1.22751	3.23843e-46	3.59709e-45	889.058	864.103	389.702	349.206	383.965
ENSG00000140044.13	JDP2	396.128	652.991	224.886	-1.53537	3.28954e-46	3.65125e-45	607.597	698.385	234.21	213.762	226.687
ENSG00000132589.16	FLOT2	399.581	638.649	240.203	-1.40878	3.47847e-46	3.85543e-45	621	656.297	241.984	234.954	243.67
ENSG00000188070.9	C11orf95	206.788	379.34	91.7531	-2.04414	5.1199e-46	5.66259e-45	364.112	394.568	95.2388	84.7677	95.2528
ENSG00000122035.7	RASL11A	96.2965	232.78	5.3074	-5.48555	6.34268e-46	7.00497e-45	244.603	220.958	4.85912	7.3711	3.69197
ENSG00000151490.15	PTPRO	159.729	311.751	58.3815	-2.41709	9.19429e-46	1.01327e-44	332.838	290.665	56.3658	58.9688	59.8099
ENSG00000106868.17	SUSD1	256.208	458.092	121.618	-1.91624	9.8773e-46	1.08777e-44	499.257	416.926	123.422	118.859	122.573
ENSG00000267469.1	AC005944.1	222.512	432.283	82.6654	-2.39676	1.0263e-45	1.12944e-44	493.673	370.894	85.5205	89.3746	73.101
ENSG00000198901.14	PRC1	120.121	251.976	32.2168	-2.97463	1.86699e-45	2.04301e-44	258.005	245.947	29.1547	38.6983	28.7974
ENSG00000131389.17	SLC6A6	556.413	873.929	344.735	-1.3418	2.04042e-45	2.22964e-44	933.734	814.124	340.138	330.778	363.29
ENSG00000151320.11	AKAP6	134.193	271.506	42.6507	-2.6683	4.56908e-45	4.96131e-44	260.239	282.773	38.873	46.9908	42.0884
ENSG00000077684.16	JADE1	547.725	823.209	364.069	-1.17798	8.5568e-45	9.22669e-44	830.979	815.44	371.237	358.42	362.551
ENSG00000104518.11	GSDMD	215.11	386.923	100.567	-1.94367	9.55196e-45	1.02926e-43	389.8	384.046	93.2951	108.724	99.6831
ENSG00000276600.5	RAB7B	97.0869	218.099	16.4125	-3.71047	1.15939e-44	1.24668e-43	209.978	226.219	10.6901	19.3491	19.1982
ENSG00000183386.10	FHL3	171.732	327.111	68.1464	-2.25665	1.38166e-44	1.48261e-43	322.786	331.437	69.9713	59.8902	74.5778
ENSG00000102452.18	NALCN	643.679	951.966	438.155	-1.11979	1.54442e-44	1.65382e-43	980.644	923.288	425.659	445.03	443.775
ENSG00000214078.13	CPNE1	887.677	1314.83	602.91	-1.12848	1.89838e-44	2.03005e-43	1352.57	1277.08	659.869	575.867	572.993
ENSG00000166681.14	BEX3	1063.22	1621.87	690.794	-1.23248	2.90849e-44	3.10166e-43	1708.87	1534.87	630.714	767.516	674.153
ENSG00000162783.11	IER5	461.187	727.234	283.823	-1.35526	3.07152e-44	3.27326e-43	682.43	772.037	283.773	285.63	282.066
ENSG00000144583.5	MARCHF4	258.86	453.113	129.359	-1.81711	3.14559e-44	3.34989e-43	459.049	447.177	137.999	136.365	113.713
ENSG00000126822.17	PLEKHG3	111.873	235.385	29.5326	-2.98836	3.88384e-44	4.13041e-43	230.083	240.686	30.1266	26.7202	31.7509
ENSG00000168994.14	PXDC1	885.77	1272.57	627.904	-1.01595	4.97187e-44	5.27665e-43	1228.6	1316.54	624.883	605.352	653.478
ENSG00000196739.15	COL27A1	131.844	282.759	31.2342	-3.18638	5.00244e-44	5.30546e-43	244.603	320.915	39.8448	25.7989	28.059
ENSG00000110315.7	RNF141	889.176	1273.92	632.683	-1.01158	6.95371e-44	7.34977e-43	1302.31	1245.52	667.643	603.509	626.896
ENSG00000168090.10	COPS6	677.85	1013.98	453.764	-1.15668	1.03127e-43	1.08704e-42	978.41	1049.55	421.772	473.593	465.926
ENSG00000244509.4	APOBEC3C	584.379	915.087	363.906	-1.32643	1.06865e-43	1.12567e-42	951.605	878.57	339.167	350.127	402.425
ENSG00000136478.8	TEX2	499.924	760.073	326.491	-1.21818	1.34959e-43	1.41872e-42	771.783	748.363	319.73	325.25	334.492
ENSG00000198763.3	MT-ND2	4229.74	6191.44	2921.95	-1.0835	1.71598e-43	1.799e-42	6777.39	5605.49	2889.23	2801.94	3074.67
ENSG00000166250.12	CLMP	170.372	321.057	69.9155	-2.19877	1.85965e-43	1.9483e-42	331.721	310.393	72.8868	64.4971	72.3626
ENSG00000185532.20	PRKG1	742.495	1137.82	478.944	-1.24937	1.98915e-43	2.08256e-42	1235.3	1040.34	459.673	484.65	492.509
ENSG00000071051.14	NCK2	362.384	607.704	198.838	-1.60607	2.19911e-43	2.30082e-42	628.819	586.59	191.449	180.592	224.472
ENSG00000197646.8	PDCD1LG2	235.314	420.477	111.872	-1.90269	3.51348e-43	3.67103e-42	426.658	414.296	96.2106	116.095	123.312
ENSG00000181751.10	MACIR	132.408	264.434	44.3905	-2.56841	5.07746e-43	5.29443e-42	265.824	263.045	39.8448	46.0694	47.2572
ENSG00000134369.15	NAV1	1545.61	2263.93	1066.72	-1.08468	5.73577e-43	5.96481e-42	2202.54	2325.32	1141.89	949.951	1108.33
ENSG00000168077.14	SCARA3	84.704	202.874	5.92379	-5.07128	6.48729e-43	6.74182e-42	211.095	194.653	4.85912	5.52833	7.38394
ENSG00000213719.8	CLIC1	2144.41	3116.71	1496.21	-1.05954	6.90118e-43	7.16234e-42	3159.73	3073.68	1401.37	1673.24	1414.02
ENSG00000107331.17	ABCA2	561.794	848.72	370.51	-1.19551	7.0241e-43	7.28016e-42	839.914	857.527	391.645	345.52	374.366
ENSG00000184304.16	PRKD1	285.625	480.451	155.741	-1.62874	7.36095e-43	7.61909e-42	499.257	461.644	163.266	151.108	152.847
ENSG00000185909.15	KLHDC8B	244.246	424.35	124.176	-1.77405	7.50313e-43	7.76108e-42	442.295	406.405	118.563	129.916	124.05
ENSG00000139178.11	C1RL	387.992	639.708	220.181	-1.53611	7.60706e-43	7.86334e-42	675.729	603.688	196.308	229.426	234.809
ENSG00000165434.8	PGM2L1	161.787	307.681	64.5241	-2.25032	7.79514e-43	8.05237e-42	319.435	295.926	63.1686	61.733	68.6706
ENSG00000006327.14	TNFRSF12A	804.822	1180.49	554.375	-1.08688	1.15713e-42	1.18976e-41	1110.21	1250.78	542.278	550.068	570.778
ENSG00000183779.7	ZNF703	221.212	393.562	106.312	-1.88138	1.45026e-42	1.4882e-41	396.502	390.622	98.1542	104.117	116.666
ENSG00000003989.18	SLC7A2	483.333	758.575	299.838	-1.34052	1.53318e-42	1.5712e-41	810.874	706.276	303.209	288.394	307.91
ENSG00000116774.12	OLFML3	85.4872	196.199	11.6793	-4.059	3.33147e-42	3.38499e-41	212.212	180.186	10.6901	11.0567	13.2911
ENSG00000130638.17	ATXN10	1015.33	1543.06	663.508	-1.21923	4.0247e-42	4.084e-41	1685.41	1400.71	626.827	702.097	661.601
ENSG00000095015.6	MAP3K1	294.426	488.702	164.908	-1.57134	4.29453e-42	4.35496e-41	502.608	474.796	171.041	164.928	158.755
ENSG00000136531.18	SCN2A	106.985	232.879	23.0557	-3.32471	4.51028e-42	4.57075e-41	243.486	222.273	14.5774	29.4844	25.1054
ENSG00000107968.10	MAP3K8	148.783	294.674	51.5218	-2.50384	5.02083e-42	5.07487e-41	288.162	301.187	39.8448	57.126	57.5947
ENSG00000134202.11	GSTM3	433.392	691.989	260.995	-1.40913	7.28625e-42	7.33596e-41	746.094	637.884	264.336	254.303	264.345
ENSG00000176720.6	BOK	354.758	569.072	211.882	-1.4251	1.39644e-41	1.40414e-40	552.869	585.275	221.576	203.627	210.442
ENSG00000115252.18	PDE1A	272.684	487.862	129.231	-1.91562	1.50704e-41	1.51241e-40	541.7	434.024	115.647	135.444	136.603
ENSG00000159674.12	SPON2	88.5218	201.956	12.8992	-4.01324	1.5819e-41	1.58651e-40	206.628	197.284	17.4928	13.8208	7.38394
ENSG00000117266.16	CDK18	248.609	426.928	129.73	-1.71699	1.83885e-41	1.84063e-40	413.255	440.6	123.422	137.287	128.48
ENSG00000114626.18	ABTB1	399.716	657.359	227.953	-1.5287	2.01198e-41	2.01263e-40	617.649	697.069	216.717	255.224	211.919
ENSG00000133321.11	PLAAT4	93.1758	211.413	14.3509	-3.85751	2.68717e-41	2.68457e-40	233.434	189.392	8.74642	16.585	17.7214
ENSG00000126562.17	WNK4	83.5987	194.226	9.84705	-4.27612	3.06272e-41	3.05779e-40	212.212	176.24	7.77459	9.21388	12.5527
ENSG00000053747.17	LAMA3	193.138	366.161	77.7891	-2.24698	3.22822e-41	3.21887e-40	349.592	382.731	84.5487	87.5318	61.2867
ENSG00000149201.10	CCDC81	105.216	258.145	3.26268	-6.34707	3.52915e-41	3.51667e-40	284.811	231.48	3.8873	3.68555	2.21518
ENSG00000115825.11	PRKD3	814.4	1164.65	580.898	-1.0016	4.49756e-41	4.47015e-40	1162.7	1166.6	544.222	602.588	595.884
ENSG00000155363.18	MOV10	402.349	652.292	235.72	-1.47521	4.55116e-41	4.52052e-40	696.95	607.634	242.956	247.853	216.349
ENSG00000113749.7	HRH2	171.184	320.922	71.3587	-2.16636	6.8929e-41	6.829e-40	340.657	301.187	70.9432	66.3399	76.7929
ENSG00000141574.8	SECTM1	160.438	324.424	51.1136	-2.66252	8.25674e-41	8.16974e-40	375.281	273.567	44.7039	52.5191	56.1179
ENSG00000180139.11	ACTA2-AS1	150.37	372.925	2.00053	-7.52976	8.42832e-41	8.3342e-40	369.696	376.154	1.94365	1.84278	2.21518
ENSG00000129515.20	SNX6	1050.41	1514.5	741.016	-1.03205	8.59219e-41	8.48e-40	1584.89	1444.12	690.967	791.472	740.609
ENSG00000185499.16	MUC1	154.554	292.044	62.8936	-2.21942	9.04809e-41	8.92426e-40	288.162	295.926	65.1122	64.4971	59.0715
ENSG00000134330.19	IAH1	317.219	524.078	179.314	-1.54262	9.6007e-41	9.45727e-40	511.543	536.612	161.323	189.806	186.814
ENSG00000115355.17	CCDC88A	411.846	635.747	262.579	-1.27661	1.20455e-40	1.18355e-39	638.871	632.623	267.252	259.831	260.653
ENSG00000179104.9	TMTC2	84.9384	192.65	13.1307	-3.89085	1.57724e-40	1.54679e-39	207.745	177.555	16.521	11.0567	11.8143
ENSG00000169213.7	RAB3B	609.662	1017.56	337.733	-1.59655	1.91054e-40	1.86775e-39	1138.13	896.984	380.955	320.643	311.602
ENSG00000249835.2	VCAN-AS1	90.7161	215.708	7.38788	-4.85522	2.36383e-40	2.30943e-39	259.122	172.295	7.77459	5.52833	8.86072
ENSG00000155324.10	GRAMD2B	486.049	739.489	317.089	-1.2236	4.61506e-40	4.49186e-39	774.016	704.961	323.617	308.665	318.986
ENSG00000114861.23	FOXP1	963.395	1383.49	683.33	-1.01881	5.28588e-40	5.13187e-39	1475.43	1291.55	681.249	668.006	700.736
ENSG00000105429.13	MEGF8	781.845	1126.99	551.747	-1.02775	5.9258e-40	5.74595e-39	1120.26	1133.72	556.855	515.056	583.331
ENSG00000225663.8	MCRIP1	398.358	643.711	234.788	-1.45328	9.51547e-40	9.19216e-39	623.234	664.189	209.914	262.596	231.856
ENSG00000174028.6	FAM3C2P	403.295	701.127	204.74	-1.77142	9.94736e-40	9.60338e-39	680.196	722.059	223.52	160.321	230.379
ENSG00000182168.15	UNC5C	176.536	321.814	79.6846	-2.01937	1.13995e-39	1.09917e-38	330.604	313.024	83.5769	80.1607	75.3162
ENSG00000187720.14	THSD4	269.091	470.211	135.012	-1.79117	1.21175e-39	1.16622e-38	459.049	481.372	133.14	116.095	155.801
ENSG00000139734.19	DIAPH3	313.721	532.1	168.135	-1.6622	1.38786e-39	1.33405e-38	584.142	480.057	165.21	161.243	177.953
ENSG00000083857.14	FAT1	2707.48	3928.9	1893.2	-1.05282	1.40505e-39	1.34974e-38	3574.1	4283.69	2014.59	1805	1860.01
ENSG00000103335.22	PIEZO1	1364.48	2023.22	925.321	-1.12868	1.71504e-39	1.64548e-38	1906.56	2139.87	1024.3	844.913	906.747
ENSG00000158246.8	TENT5B	82.771	197.739	6.12574	-4.97356	2.40745e-39	2.30696e-38	224.498	170.979	5.83095	3.68555	8.86072
ENSG00000112837.17	TBX18	171.839	315.906	75.795	-2.06463	2.43887e-39	2.33561e-38	308.266	323.545	82.6051	74.6324	70.1474
ENSG00000058056.10	USP13	137.107	265.092	51.7844	-2.36425	3.11602e-39	2.97308e-38	265.824	264.36	55.394	53.4405	46.5188
ENSG00000146373.16	RNF217	320.14	520.122	186.819	-1.48166	7.18153e-39	6.80598e-38	533.881	506.362	183.675	201.784	174.999
ENSG00000102181.21	CD99L2	718.991	1089.64	471.889	-1.21178	8.71078e-39	8.23512e-38	1111.32	1067.96	473.278	521.505	420.884
ENSG00000171476.22	HOPX	84.9769	191.632	13.8734	-3.79215	9.88126e-39	9.31894e-38	204.394	178.871	9.71824	19.3491	12.5527
ENSG00000154188.10	ANGPT1	91.795	197.984	21.0024	-3.24769	1.109e-38	1.04462e-37	192.108	203.86	20.4083	24.8775	17.7214
ENSG00000087884.14	AAMDC	151.428	294.152	56.2781	-2.37226	1.47754e-38	1.38671e-37	279.227	309.078	44.7039	59.8902	64.2402
ENSG00000110013.13	SIAE	685.663	988.197	483.973	-1.02791	1.70435e-38	1.59764e-37	987.346	989.049	490.771	456.087	505.061
ENSG00000072422.17	RHOBTB1	231.407	398.651	119.912	-1.73079	1.71572e-38	1.60732e-37	413.255	384.046	120.506	111.488	127.742
ENSG00000097021.20	ACOT7	204.38	359.376	101.049	-1.83094	1.83112e-38	1.71439e-37	374.164	344.589	96.2106	105.038	101.898
ENSG00000099998.19	GGT5	77.8963	185.625	6.07728	-4.99757	1.91231e-38	1.78825e-37	183.173	188.077	6.80277	9.21388	2.21518
ENSG00000137502.10	RAB30	358.44	574.349	214.501	-1.41638	2.5475e-38	2.37649e-37	589.727	558.971	198.252	211.919	233.332
ENSG00000143341.12	HMCN1	378.693	814.467	88.1766	-3.20816	2.97138e-38	2.76692e-37	751.678	877.255	108.844	66.3399	89.3456
ENSG00000090238.12	YPEL3	383.898	609.5	233.496	-1.38107	3.46807e-38	3.22556e-37	586.376	632.623	244.9	211.919	243.67
ENSG00000143797.12	MBOAT2	282.789	473.723	155.499	-1.60216	4.11084e-38	3.82108e-37	471.335	476.112	159.379	137.287	169.831
ENSG00000152990.14	ADGRA3	155.125	290.358	64.97	-2.1598	4.1274e-38	3.83417e-37	307.149	273.567	64.1404	63.5758	67.1938
ENSG00000082497.12	SERTAD4	89.8289	197.227	18.23	-3.40641	6.2548e-38	5.80696e-37	193.225	201.229	12.6337	18.4278	23.6286
ENSG00000090776.6	EFNB1	259.916	460.8	125.994	-1.86547	7.30713e-38	6.77988e-37	402.086	519.514	120.506	128.994	128.48
ENSG00000165072.10	MAMDC2	231.35	401.318	118.038	-1.75735	9.86411e-38	9.14688e-37	405.437	397.198	107.872	113.331	132.911
ENSG00000185652.12	NTF3	244.122	423.019	124.858	-1.75214	1.07211e-37	9.92964e-37	405.437	440.6	107.872	130.837	135.864
ENSG00000183160.9	TMEM119	110.014	271.731	2.20248	-6.88299	1.43955e-37	1.32931e-36	272.525	270.936	2.91547	0	3.69197
ENSG00000111684.11	LPCAT3	102.685	219.268	24.9636	-3.12259	1.49121e-37	1.37619e-36	241.252	197.284	25.2674	19.3491	30.2741
ENSG00000164024.12	METAP1	544.066	798.961	374.135	-1.09252	1.68954e-37	1.55738e-36	793.004	804.918	377.068	358.42	386.918
ENSG00000168502.17	MTCL1	347.151	555.507	208.247	-1.41123	1.71883e-37	1.58343e-36	520.479	590.536	203.111	208.234	213.396
ENSG00000167074.15	TEF	112.569	230.656	33.8451	-2.76173	1.82474e-37	1.68e-36	216.68	244.632	27.2111	39.6197	34.7045
ENSG00000163840.10	DTX3L	623.983	955.025	403.289	-1.24692	2.48319e-37	2.27944e-36	1049.89	860.157	407.194	401.725	400.948
ENSG00000166825.15	ANPEP	111.33	240.985	24.894	-3.2825	2.70909e-37	2.48386e-36	278.11	203.86	32.0702	17.5064	25.1054
ENSG00000152661.9	GJA1	140.556	266.804	56.3915	-2.23948	3.45462e-37	3.15807e-36	261.356	272.252	51.5067	60.8116	56.8563
ENSG00000130600.19	H19	602.558	1465.74	27.1008	-5.75688	3.70177e-37	3.38002e-36	941.552	1989.94	28.1829	25.7989	27.3206
ENSG00000142102.16	PGGHG	292.617	493.66	158.589	-1.63752	4.05456e-37	3.69996e-36	446.763	540.558	168.126	154.793	152.847
ENSG00000121068.14	TBX2	385.51	602.939	240.556	-1.32324	4.19335e-37	3.82437e-36	623.234	582.645	237.125	227.583	256.961
ENSG00000100299.18	ARSA	360.353	560.424	226.973	-1.30472	4.29358e-37	3.91347e-36	553.986	566.862	234.21	222.976	223.733
ENSG00000157557.13	ETS2	651.964	936.59	462.214	-1.01695	6.48756e-37	5.88897e-36	953.838	919.342	448.011	454.244	484.386
ENSG00000119408.17	NEK6	412.485	630.549	267.11	-1.23915	6.59087e-37	5.97924e-36	645.572	615.525	273.083	254.303	273.944
ENSG00000143382.16	ADAMTSL4	205.4	356.036	104.976	-1.76085	6.94445e-37	6.29633e-36	345.124	366.948	103.013	107.802	104.114
ENSG00000154277.13	UCHL1	578.23	841.241	402.89	-1.06304	9.22175e-37	8.34644e-36	872.304	810.179	394.561	407.253	406.855
ENSG00000198771.11	RCSD1	108.472	223.756	31.6152	-2.81751	1.11363e-36	1.00499e-35	205.511	242.001	26.2393	36.8555	31.7509
ENSG00000187838.17	PLSCR3	520.094	761.55	359.124	-1.08583	1.38811e-36	1.24905e-35	777.367	745.733	362.49	357.498	357.383
ENSG00000229619.4	MBNL1-AS1	141.472	270.217	55.6424	-2.28517	1.47591e-36	1.32652e-35	274.759	265.675	65.1122	47.9122	53.9027
ENSG00000110987.9	BCL7A	206.198	367.816	98.4528	-1.90994	1.5581e-36	1.39877e-35	397.619	338.013	109.816	93.9816	91.5608
ENSG00000164236.12	ANKRD33B	371.898	582.078	231.777	-1.33132	1.63678e-36	1.4677e-35	584.142	580.014	252.674	217.448	225.21
ENSG00000275342.5	PRAG1	160.466	300.17	67.3302	-2.14879	1.75824e-36	1.57571e-35	278.11	322.23	68.9995	59.8902	73.101
ENSG00000152137.8	HSPB8	571.026	825.579	401.325	-1.03871	3.05645e-36	2.72809e-35	826.511	824.646	392.617	397.118	414.239
ENSG00000138835.22	RGS3	135.183	265.541	48.278	-2.45958	3.09043e-36	2.75525e-35	290.396	240.686	40.8166	55.2833	48.734
ENSG00000105559.12	PLEKHA4	267.158	445.143	148.502	-1.58411	3.6353e-36	3.23544e-35	415.489	474.796	153.548	150.186	141.772
ENSG00000204580.13	DDR1	347.072	552.533	210.098	-1.39113	3.91121e-36	3.477e-35	553.986	551.079	213.801	189.806	226.687
ENSG00000138944.8	SHISAL1	82.4917	180.166	17.3757	-3.39731	6.06216e-36	5.36761e-35	185.407	174.925	20.4083	18.4278	13.2911
ENSG00000165886.5	UBTD1	134.564	256.814	53.0635	-2.26915	6.91347e-36	6.11789e-35	247.953	265.675	54.4222	47.9122	56.8563
ENSG00000141338.14	ABCA8	636.019	937.107	435.293	-1.10461	6.95965e-36	6.15524e-35	903.578	970.636	462.588	398.04	445.251
ENSG00000163975.12	MELTF	243.183	421.453	124.336	-1.75473	6.9937e-36	6.18182e-35	378.631	464.275	120.506	122.545	129.957
ENSG00000082482.14	KCNK2	70.9018	166.492	7.17537	-4.53293	9.78574e-36	8.63006e-35	176.471	156.512	9.71824	3.68555	8.12233
ENSG00000011422.12	PLAUR	194.436	338.218	98.5814	-1.77605	1.0629e-35	9.36837e-35	338.423	338.013	99.1261	93.9816	102.637
ENSG00000204267.16	TAP2	561.243	821.189	387.946	-1.08374	1.15581e-35	1.01758e-34	861.135	781.244	379.983	396.197	387.657
ENSG00000130255.13	RPL36	962.442	1413.6	661.669	-1.09361	1.84849e-35	1.62372e-34	1425.17	1402.03	580.179	723.289	681.537
ENSG00000151276.23	MAGI1	445.57	706.963	271.308	-1.38418	2.31961e-35	2.03294e-34	718.171	695.754	310.012	235.875	268.037
ENSG00000101460.13	MAP1LC3A	145.703	273.281	60.6511	-2.17996	3.13335e-35	2.73991e-34	262.473	284.089	67.0559	61.733	53.1643
ENSG00000162337.12	LRP5	387.036	660.992	204.399	-1.69353	3.21813e-35	2.81246e-34	724.872	597.112	225.463	167.693	220.041
ENSG00000143995.20	MEIS1	213.1	370.906	107.896	-1.7808	3.54961e-35	3.09691e-34	399.853	341.959	101.07	109.645	112.974
ENSG00000119326.15	CTNNAL1	553.547	831.268	368.399	-1.17535	3.89732e-35	3.39073e-34	895.759	766.776	354.716	373.162	377.319
ENSG00000276023.5	DUSP14	386.669	608.362	238.874	-1.34419	4.48177e-35	3.89703e-34	628.819	587.906	228.379	223.897	264.345
ENSG00000138080.14	EMILIN1	1782.17	3011.48	962.635	-1.64445	5.09249e-35	4.42063e-34	2678.34	3344.62	962.106	914.938	1010.86
ENSG00000004059.11	ARF5	588.88	844.712	418.325	-1.01418	5.2992e-35	4.59491e-34	833.212	856.212	434.405	406.332	414.239
ENSG00000188483.8	IER5L	172.263	309.194	80.9764	-1.9278	5.71758e-35	4.95492e-34	317.202	301.187	79.6896	74.6324	88.6072
ENSG00000188112.9	C6orf132	133.321	250.896	54.9378	-2.19337	6.74962e-35	5.83624e-34	247.953	253.838	56.3658	55.2833	53.1643
ENSG00000089351.15	GRAMD1A	421.978	634.359	280.39	-1.17828	8.27253e-35	7.12919e-34	654.507	614.21	276.97	279.18	285.02
ENSG00000158008.10	EXTL1	70.5333	168.167	5.44423	-4.88021	9.68978e-35	8.33203e-34	179.822	156.512	1.94365	5.52833	8.86072
ENSG00000068489.13	PRR11	72.0789	165.698	9.66603	-4.12066	1.0703e-34	9.18795e-34	185.407	145.99	11.6619	9.21388	8.12233
ENSG00000010292.13	NCAPD2	405.387	615.58	265.259	-1.21128	1.15103e-34	9.87007e-34	591.961	639.199	258.505	266.281	270.99
ENSG00000157617.17	C2CD2	456.92	676.201	310.732	-1.12177	1.60591e-34	1.37251e-33	686.898	665.504	314.871	301.294	316.032
ENSG00000124766.7	SOX4	104.893	215.52	31.1419	-2.78602	1.70039e-34	1.45246e-33	239.018	192.023	27.2111	32.2486	33.9661
ENSG00000140848.17	CPNE2	179.005	319.392	85.4129	-1.89653	1.83793e-34	1.56908e-33	306.032	332.752	87.4642	76.4752	92.2992
ENSG00000078401.7	EDN1	85.3411	209.289	2.70942	-6.3299	1.95125e-34	1.6649e-33	205.511	213.066	3.8873	2.76416	1.47679
ENSG00000138131.4	LOXL4	257.725	462.872	120.96	-1.92921	2.02245e-34	1.7247e-33	400.97	524.775	103.013	133.601	126.265
ENSG00000164920.9	OSR2	71.9409	160.349	13.0024	-3.62754	2.30343e-34	1.96e-33	164.185	156.512	12.6337	13.8208	12.5527
ENSG00000111077.18	TNS2	530.785	784.504	361.64	-1.1143	3.98012e-34	3.38114e-33	770.666	798.342	372.209	331.7	381.011
ENSG00000157368.11	IL34	114.009	222.53	41.6619	-2.42127	4.63401e-34	3.92801e-33	226.732	218.327	45.6757	38.6983	40.6117
ENSG00000116667.15	C1orf21	402.2	611.921	262.385	-1.22255	5.55772e-34	4.70327e-33	610.948	612.895	280.857	244.168	262.13
ENSG00000178343.5	SHISA3	96.9312	197.452	29.9175	-2.7219	5.80304e-34	4.9082e-33	205.511	189.392	31.0984	27.6416	31.0125
ENSG00000072657.9	TRHDE	94.0914	196.966	25.5082	-2.95304	6.14441e-34	5.19125e-33	188.757	205.175	32.0702	19.3491	25.1054
ENSG00000175602.4	CCDC85B	300.347	544.656	137.473	-1.97948	6.77665e-34	5.70675e-33	450.113	639.199	119.534	147.422	145.464
ENSG00000164659.15	ELAPOR2	563.765	828.872	387.026	-1.10115	7.4971e-34	6.30318e-33	885.707	772.037	390.673	380.533	389.872
ENSG00000104324.16	CPQ	356.843	555.027	224.721	-1.30001	7.69657e-34	6.46737e-33	562.921	547.134	209.914	222.054	242.193
ENSG00000111206.13	FOXM1	77.1683	179.921	8.66683	-4.3826	8.04733e-34	6.75845e-33	217.797	142.044	10.6901	6.44971	8.86072
ENSG00000162627.17	SNX7	432.766	659.995	281.28	-1.22849	8.23217e-34	6.90994e-33	676.845	643.145	253.646	298.53	291.666
ENSG00000172819.17	RARG	354.824	543.696	228.909	-1.24628	1.58005e-33	1.31436e-32	534.998	552.395	221.576	234.032	231.117
ENSG00000109686.19	SH3D19	511.889	771.331	338.928	-1.18427	1.58029e-33	1.31436e-32	815.342	727.32	316.815	334.464	365.505
ENSG00000163629.13	PTPN13	515.789	762.197	351.517	-1.11671	1.60696e-33	1.33512e-32	799.705	724.689	355.688	332.621	366.243
ENSG00000127920.6	GNG11	302.102	512.366	161.926	-1.65274	1.78198e-33	1.47815e-32	524.946	499.786	136.055	158.479	191.244
ENSG00000112984.12	KIF20A	68.9911	166.987	3.66032	-5.48118	2.0772e-33	1.71752e-32	170.887	163.088	1.94365	4.60694	4.43036
ENSG00000136720.7	HS6ST1	244.149	399.418	140.637	-1.50615	2.18282e-33	1.80292e-32	389.8	409.035	142.858	140.972	138.08
ENSG00000109736.15	MFSD10	383.622	592.219	244.557	-1.27776	2.87614e-33	2.37052e-32	625.468	558.971	255.59	228.504	249.577
ENSG00000204381.12	LAYN	163.609	296.052	75.3135	-1.97834	3.07256e-33	2.52972e-32	294.863	297.241	68.9995	87.5318	69.409
ENSG00000150471.16	ADGRL3	101.579	205.604	32.2295	-2.67217	3.36827e-33	2.76584e-32	209.978	201.229	26.2393	38.6983	31.7509
ENSG00000135736.6	CCDC102A	99.4774	205.019	29.1161	-2.79629	4.21596e-33	3.45459e-32	194.342	215.697	27.2111	23.9561	36.1813
ENSG00000145147.20	SLIT2	420.291	637.214	275.676	-1.21028	4.56184e-33	3.73209e-32	666.793	607.634	288.632	257.067	281.328
ENSG00000006282.21	SPATA20	433.131	643.863	292.644	-1.13541	5.03679e-33	4.11413e-32	651.157	636.569	288.632	282.866	306.433
ENSG00000147224.13	PRPS1	567.022	856.633	373.948	-1.19942	6.97197e-33	5.67984e-32	935.968	777.298	363.462	394.354	364.028
ENSG00000163812.15	ZDHHC3	545.425	802.453	374.074	-1.10369	7.1557e-33	5.82646e-32	849.966	754.939	391.645	354.734	375.842
ENSG00000160013.9	PTGIR	373.984	572.141	241.879	-1.24249	7.69858e-33	6.25863e-32	599.779	544.503	232.266	246.011	247.362
ENSG00000151729.11	SLC25A4	515.826	755.099	356.311	-1.08752	9.34289e-33	7.58345e-32	790.77	719.428	356.659	370.398	341.876
ENSG00000169692.13	AGPAT2	249.926	411.156	142.44	-1.52878	1.10927e-32	8.99433e-32	390.917	431.394	137.027	152.95	137.341
ENSG00000106123.12	EPHB6	103.711	204.685	36.3946	-2.48621	1.96635e-32	1.58608e-31	205.511	203.86	35.9575	34.0913	39.1349
ENSG00000112146.17	FBXO9	595.012	868.898	412.421	-1.07575	2.43675e-32	1.96142e-31	864.486	873.31	384.842	455.166	397.256
ENSG00000140931.20	CMTM3	209.573	351	115.288	-1.6048	2.53558e-32	2.03992e-31	357.41	344.589	112.732	114.252	118.881
ENSG00000240065.8	PSMB9	179.927	312.743	91.383	-1.77347	2.5648e-32	2.06235e-31	321.669	303.817	84.5487	95.8243	93.776
ENSG00000132329.11	RAMP1	64.5547	155.385	4.00107	-5.26907	2.67071e-32	2.1464e-31	160.835	149.936	3.8873	3.68555	4.43036
ENSG00000134057.15	CCNB1	98.052	199.623	30.3382	-2.71225	2.84846e-32	2.28216e-31	203.277	195.969	34.0138	23.0347	33.9661
ENSG00000115652.15	UXS1	226.642	385.608	120.666	-1.66712	3.01769e-32	2.41524e-31	389.8	381.415	106.901	117.016	138.08
ENSG00000153246.13	PLA2R1	95.2718	192.921	30.1721	-2.68191	3.0486e-32	2.43747e-31	189.874	195.969	28.1829	35.0127	27.3206
ENSG00000163359.16	COL6A3	6367.82	9980.44	3959.41	-1.3335	3.78599e-32	3.02236e-31	8986.63	10974.2	3935.89	3826.52	4115.81
ENSG00000018408.15	WWTR1	515.02	754.154	355.597	-1.08173	4.0871e-32	3.25937e-31	771.783	736.526	345.969	339.071	381.75
ENSG00000162946.23	DISC1	120.303	228.052	48.4713	-2.2406	6.92542e-32	5.49459e-31	231.2	224.904	48.5912	52.5191	44.3036
ENSG00000188191.15	PRKAR1B	222.806	367.565	126.301	-1.54176	7.35657e-32	5.83367e-31	370.813	364.317	131.196	120.702	127.004
ENSG00000100968.14	NFATC4	566.421	812.024	402.685	-1.01004	9.97662e-32	7.8831e-31	771.783	852.266	404.279	403.568	400.209
ENSG00000117318.9	ID3	331.615	512.789	210.832	-1.28643	1.03229e-31	8.14427e-31	534.998	490.579	210.886	219.29	202.32
ENSG00000110719.10	TCIRG1	508.333	794.149	317.788	-1.31769	1.06876e-31	8.42344e-31	817.576	770.722	323.617	270.888	358.859
ENSG00000196507.11	TCEAL3	556.391	903.234	325.162	-1.46826	1.16403e-31	9.16032e-31	774.016	1032.45	306.125	314.193	355.167
ENSG00000081320.11	STK17B	326.885	506.411	207.201	-1.29028	1.70178e-31	1.33043e-30	532.765	480.057	203.111	207.312	211.181
ENSG00000049246.14	PER3	86.541	185.067	20.8573	-3.12827	3.22804e-31	2.50845e-30	182.056	188.077	22.352	12.8994	27.3206
ENSG00000172301.11	COPRS	372.41	556.541	249.656	-1.156	6.53765e-31	5.04738e-30	560.687	552.395	244.9	251.539	252.531
ENSG00000184254.17	ALDH1A3	71.601	155.917	15.39	-3.32715	6.64748e-31	5.12961e-30	147.432	164.403	15.5492	12.8994	17.7214
ENSG00000116678.20	LEPR	121.871	234.664	46.6747	-2.34314	6.96499e-31	5.37195e-30	223.381	245.947	51.5067	51.5977	36.9197
ENSG00000161958.11	FGF11	66.401	148.72	11.5215	-3.68709	7.80277e-31	6.00615e-30	139.613	157.827	8.74642	14.7422	11.0759
ENSG00000140332.17	TLE3	241.772	392.471	141.306	-1.47267	9.51374e-31	7.29418e-30	408.788	376.154	135.084	141.894	146.94
ENSG00000196950.14	SLC39A10	243.85	395.175	142.968	-1.46343	1.37789e-30	1.05278e-29	393.151	397.198	145.774	131.758	151.371
ENSG00000112640.16	PPP2R5D	264.639	421.928	159.779	-1.40356	1.50979e-30	1.15185e-29	417.723	426.133	172.985	152.029	154.324
ENSG00000076067.13	RBMS2	525.815	772.855	361.121	-1.10216	2.18762e-30	1.66407e-29	790.77	754.939	400.392	341.835	341.138
ENSG00000175600.16	SUGCT	121.069	230.88	47.8615	-2.2597	2.81677e-30	2.1395e-29	228.966	232.795	37.9011	52.5191	53.1643
ENSG00000287151.1	C2orf27A	258.286	416.865	152.566	-1.44904	3.49546e-30	2.65111e-29	415.489	418.242	164.238	135.444	158.016
ENSG00000183049.13	CAMK1D	134.531	254.372	54.6371	-2.21071	4.18317e-30	3.16804e-29	268.058	240.686	56.3658	43.3052	64.2402
ENSG00000167900.12	TK1	72.5652	159.42	14.6622	-3.44364	4.68081e-30	3.53801e-29	182.056	136.783	12.6337	16.585	14.7679
ENSG00000148773.14	MKI67	64.6971	157.123	3.07968	-5.63719	4.95626e-30	3.74255e-29	170.887	143.36	3.8873	0.921388	4.43036
ENSG00000140853.16	NLRC5	232.209	400.415	120.071	-1.74586	4.98858e-30	3.76513e-29	437.827	363.002	140.915	107.802	111.497
ENSG00000099864.18	PALM	356.231	596.812	195.844	-1.60145	5.23578e-30	3.94978e-29	507.076	686.548	178.816	202.705	206.012
ENSG00000143819.13	EPHX1	245.34	404.919	138.954	-1.54482	5.39766e-30	4.06991e-29	438.944	370.894	144.802	128.073	143.987
ENSG00000168453.16	HR	59.7535	143.224	4.10625	-5.14708	6.51142e-30	4.90017e-29	149.666	136.783	2.91547	6.44971	2.95357
ENSG00000130956.14	HABP4	420.567	614.886	291.022	-1.07758	7.13489e-30	5.36415e-29	599.779	629.993	287.66	293.001	292.404
ENSG00000126709.16	IFI6	1401.49	3143.88	239.902	-3.71122	7.65231e-30	5.74479e-29	3979.54	2308.22	223.52	219.29	276.898
ENSG00000128274.17	A4GALT	375.548	585.262	235.739	-1.30744	1.04969e-29	7.84609e-29	526.063	644.46	236.153	230.347	240.716
ENSG00000105088.8	OLFM2	132.243	314.491	10.7432	-4.83801	1.20931e-29	9.02617e-29	309.383	319.6	9.71824	5.52833	16.9831
ENSG00000186918.14	ZNF395	413.904	611.118	282.428	-1.11562	1.22621e-29	9.14787e-29	642.221	580.014	284.744	278.259	284.282
ENSG00000186111.11	PIP5K1C	595.157	854.602	422.193	-1.01257	1.2509e-29	9.32307e-29	847.732	861.473	404.279	400.804	461.496
ENSG00000153029.15	MR1	490.186	709.88	343.724	-1.04488	1.64856e-29	1.22574e-28	737.158	682.602	331.392	337.228	362.551
ENSG00000105639.20	JAK3	120.083	224.278	50.619	-2.14877	1.89521e-29	1.40643e-28	214.446	234.11	55.394	46.9908	49.4724
ENSG00000067798.16	NAV3	356.392	545.09	230.594	-1.24098	1.91082e-29	1.41734e-28	578.558	511.623	215.745	236.797	239.24
ENSG00000107130.10	NCS1	442.927	642.161	310.104	-1.0473	2.02754e-29	1.50254e-28	633.286	651.036	303.209	305.901	321.201
ENSG00000160094.15	ZNF362	182.222	313.004	95.0347	-1.7183	2.51865e-29	1.85929e-28	326.137	299.871	100.098	83.8463	101.16
ENSG00000170525.21	PFKFB3	317.69	490.8	202.283	-1.28169	2.52754e-29	1.86408e-28	516.011	465.59	213.801	190.727	202.32
ENSG00000143390.18	RFX5	219.025	373.134	116.286	-1.67317	3.07954e-29	2.26687e-28	345.124	401.144	99.1261	123.466	126.265
ENSG00000104490.18	NCALD	70.781	173.699	2.16886	-6.23828	3.36758e-29	2.47771e-28	161.951	185.447	0.971824	1.84278	3.69197
ENSG00000157514.16	TSC22D3	426.718	631.29	290.336	-1.11892	4.14534e-29	3.04706e-28	607.597	654.982	273.083	311.429	286.497
ENSG00000156802.13	ATAD2	129.926	239.628	56.7909	-2.08347	4.34355e-29	3.19124e-28	226.732	252.523	64.1404	55.2833	50.9492
ENSG00000213445.10	SIPA1	92.0957	182.337	31.9349	-2.51176	4.39965e-29	3.2294e-28	183.173	181.501	34.0138	28.563	33.2277
ENSG00000068745.15	IP6K2	326.518	496.458	213.224	-1.21927	4.48525e-29	3.29067e-28	511.543	481.372	203.111	220.212	216.349
ENSG00000089685.15	BIRC5	62.1685	151.079	2.89455	-5.71245	5.02293e-29	3.68166e-28	157.484	144.675	3.8873	1.84278	2.95357
ENSG00000114315.4	HES1	104.065	200.244	39.9454	-2.33118	6.3692e-29	4.65962e-28	211.095	189.392	38.873	43.3052	37.6581
ENSG00000163040.15	CCDC74A	131.419	239.555	59.3281	-2.00921	6.60839e-29	4.82777e-28	242.369	236.741	61.2249	52.5191	64.2402
ENSG00000138496.16	PARP9	613.387	935.557	398.607	-1.23223	6.70775e-29	4.89805e-28	1054.36	816.755	391.645	386.983	417.192
ENSG00000196588.20	MRTFA	452.777	663.31	312.422	-1.08486	6.91678e-29	5.04593e-28	691.365	635.254	309.04	296.687	331.539
ENSG00000121297.8	TSHZ3	199.88	334.731	109.978	-1.61351	7.14405e-29	5.20437e-28	340.657	328.806	122.45	107.802	99.6831
ENSG00000182389.20	CACNB4	87.1788	174.32	29.0845	-2.58135	7.62185e-29	5.54723e-28	169.77	178.871	29.1547	28.563	29.5357
ENSG00000197594.13	ENPP1	84.5339	173.302	25.3548	-2.78143	7.80583e-29	5.67846e-28	166.419	180.186	23.3238	31.3272	21.4134
ENSG00000104415.14	CCN4	56.9772	131.497	7.29737	-4.1849	7.93985e-29	5.77325e-28	126.21	136.783	9.71824	5.52833	6.64554
ENSG00000108773.11	KAT2A	257.362	406.965	157.628	-1.36852	8.62846e-29	6.26807e-28	423.308	390.622	158.407	152.029	162.447
ENSG00000136280.17	CCM2	446.129	671.394	295.953	-1.17486	9.2631e-29	6.7228e-28	629.935	712.852	276.97	287.473	323.416
ENSG00000165495.16	PKNOX2	112.517	212.864	45.6188	-2.22571	1.30739e-28	9.45749e-28	224.498	201.229	50.5349	40.5411	45.7804
ENSG00000159128.15	IFNGR2	584.507	841.967	412.868	-1.02305	1.41348e-28	1.02202e-27	797.471	886.462	380.955	421.996	435.652
ENSG00000180340.7	FZD2	288.592	480.206	160.85	-1.57904	1.85249e-28	1.33509e-27	531.648	428.763	173.957	137.287	171.307
ENSG00000159423.17	ALDH4A1	132.02	243.427	57.7485	-2.06704	2.01517e-28	1.45165e-27	258.005	228.849	51.5067	55.2833	66.4554
ENSG00000162512.16	SDC3	422.395	639.092	277.931	-1.19663	2.11793e-28	1.52497e-27	586.376	691.808	283.773	259.831	290.189
ENSG00000165757.9	JCAD	129.548	238.276	57.0623	-2.07349	2.55003e-28	1.83014e-27	234.55	242.001	62.1967	61.733	47.2572
ENSG00000151640.13	DPYSL4	111.85	211.199	45.6166	-2.21551	2.98464e-28	2.1381e-27	198.809	223.588	50.5349	44.2266	42.0884
ENSG00000142627.13	EPHA2	691.83	1015.08	476.328	-1.092	3.52617e-28	2.52253e-27	1084.52	945.647	503.405	421.996	503.584
ENSG00000109339.24	MAPK10	85.9937	175.797	26.1247	-2.76628	3.96646e-28	2.83097e-27	175.354	176.24	25.2674	33.17	19.9366
ENSG00000099785.11	MARCHF2	151.63	266.345	75.1533	-1.82959	5.4374e-28	3.85949e-27	259.122	273.567	84.5487	70.0255	70.8858
ENSG00000152256.14	PDK1	299.506	467.329	187.623	-1.3123	6.95208e-28	4.92108e-27	432.243	502.416	190.478	179.671	192.721
ENSG00000135823.14	STX6	407.207	623.466	263.034	-1.24421	8.11107e-28	5.73101e-27	673.495	573.438	236.153	274.574	278.374
ENSG00000173163.10	COMMD1	192.85	319.418	108.47	-1.56294	9.32877e-28	6.58239e-27	320.552	318.285	109.816	115.173	100.422
ENSG00000165912.16	PACSIN3	166.851	298.667	78.9737	-1.91197	9.60263e-28	6.76946e-27	258.005	339.328	77.7459	76.4752	82.7001
ENSG00000150995.20	ITPR1	333.001	529.245	202.172	-1.38462	9.81798e-28	6.91812e-27	571.856	486.633	181.731	198.098	226.687
ENSG00000130635.16	COL5A1	15556.6	23572.9	10212.4	-1.20668	9.92619e-28	6.99119e-27	21213.4	25932.3	10188.6	9965.73	10483
ENSG00000119632.4	IFI27L2	192.783	318.823	108.757	-1.55131	1.20401e-27	8.457e-27	327.254	310.393	111.76	102.274	112.236
ENSG00000088367.23	EPB41L1	235.269	395.895	128.186	-1.61689	1.40651e-27	9.84366e-27	399.853	391.937	118.563	112.409	153.586
ENSG00000214717.12	ZBED1	171.86	292.639	91.341	-1.67273	1.4523e-27	1.01549e-26	281.461	303.817	85.5205	90.296	98.2064
ENSG00000214717.12	PAR	171.86	292.639	91.341	-1.67273	1.4523e-27	1.01549e-26	281.461	303.817	85.5205	90.296	98.2064
ENSG00000123179.14	EBPL	64.7056	141.784	13.3201	-3.41492	1.71405e-27	1.19421e-26	136.263	147.305	9.71824	18.4278	11.8143
ENSG00000133466.14	C1QTNF6	148.678	259.805	74.5938	-1.80446	2.02626e-27	1.41109e-26	251.304	268.306	80.6614	73.711	69.409
ENSG00000064703.13	DDX20	389.724	569.954	269.571	-1.07678	2.1889e-27	1.52368e-26	565.155	574.753	262.393	263.517	282.805
ENSG00000124120.11	TTPAL	384.206	564.584	263.954	-1.09933	2.22434e-27	1.54695e-26	588.61	540.558	272.111	256.146	263.607
ENSG00000149177.13	PTPRJ	433.48	639.818	295.921	-1.10816	2.31308e-27	1.60795e-26	652.274	627.362	285.716	276.416	325.632
ENSG00000258315.5	C17orf49	154.405	290.963	63.3665	-2.20949	3.7436e-27	2.58729e-26	278.11	303.817	85.5205	50.6763	53.9027
ENSG00000012232.9	EXTL3	378.555	565.153	254.157	-1.15727	3.80772e-27	2.63043e-26	567.389	562.916	281.829	241.404	239.24
ENSG00000121210.16	TMEM131L	88.5243	184.2	24.7403	-2.91759	4.60959e-27	3.17729e-26	206.628	161.773	34.0138	20.2705	19.9366
ENSG00000118292.9	C1orf54	84.209	166.987	29.0235	-2.52233	5.94018e-27	4.08536e-26	170.887	163.088	29.1547	27.6416	30.2741
ENSG00000175906.5	ARL4D	144.613	252.509	72.6818	-1.79244	6.72603e-27	4.62172e-26	244.603	260.415	72.8868	69.1041	76.0545
ENSG00000004139.14	SARM1	151.701	265.739	75.6753	-1.81384	7.21124e-27	4.94635e-26	288.162	243.317	71.915	78.318	76.7929
ENSG00000105254.12	TBCB	406.417	602.553	275.66	-1.12512	1.004e-26	6.85631e-26	605.363	599.743	244.9	294.844	287.235
ENSG00000183421.12	RIPK4	73.4161	152.008	21.0214	-2.85036	1.14314e-26	7.78453e-26	139.613	164.403	21.3801	20.2705	21.4134
ENSG00000187605.16	TET3	237.639	379.006	143.395	-1.39655	1.16956e-26	7.95884e-26	375.281	382.731	141.886	131.758	156.539
ENSG00000138642.15	HERC6	130.721	261.909	43.2626	-2.61137	1.23758e-26	8.41435e-26	323.903	199.914	49.563	43.3052	36.9197
ENSG00000015532.10	XYLT2	291.289	441.349	191.25	-1.20486	1.77767e-26	1.20442e-25	443.412	439.285	190.478	186.12	197.151
ENSG00000145604.17	SKP2	128.648	236.997	56.4148	-2.05626	2.21392e-26	1.49737e-25	226.732	247.262	52.4785	48.8336	67.9322
ENSG00000170035.16	UBE2E3	430.193	618.597	304.59	-1.02431	2.26597e-26	1.5319e-25	609.831	627.362	305.153	320.643	287.974
ENSG00000164603.12	BMT2	235.014	368.322	146.142	-1.33362	2.7094e-26	1.82849e-25	369.696	366.948	144.802	147.422	146.202
ENSG00000170430.10	MGMT	109.774	207.316	44.7461	-2.19694	3.04398e-26	2.05161e-25	205.511	209.121	38.873	41.4624	53.9027
ENSG00000184371.14	CSF1	448.956	641.953	320.291	-1.00487	4.34966e-26	2.92145e-25	657.858	626.047	338.195	302.215	320.463
ENSG00000100599.16	RIN3	190.339	312.122	109.15	-1.51114	5.97265e-26	4.0046e-25	313.851	310.393	105.929	104.117	117.405
ENSG00000122034.17	GTF3A	414.575	600.867	290.38	-1.05421	6.15045e-26	4.12024e-25	624.351	577.384	297.378	301.294	272.467
ENSG00000111885.7	MAN1A1	397.02	600.779	261.18	-1.19578	6.43726e-26	4.30866e-25	603.13	598.427	252.674	234.032	296.834
ENSG00000149564.12	ESAM	205.334	339.225	116.073	-1.5492	7.6595e-26	5.1201e-25	364.112	314.339	104.957	128.073	115.189
ENSG00000156486.8	KCNS2	50.6971	117.463	6.18674	-4.21724	8.10136e-26	5.40847e-25	113.924	121.001	5.83095	4.60694	8.12233
ENSG00000242616.4	GNG10	533.782	767.286	378.113	-1.02627	8.4145e-26	5.61269e-25	816.459	718.113	380.955	402.646	350.737
ENSG00000121691.7	CAT	317.16	472.335	213.71	-1.14492	8.86646e-26	5.90653e-25	486.971	457.698	209.914	215.605	215.611
ENSG00000167315.18	ACAA2	137.489	245.833	65.2599	-1.92495	1.12783e-25	7.49389e-25	245.719	245.947	77.7459	62.6544	55.3795
ENSG00000259807.2	AC009093.1	69.5842	149.639	16.2144	-3.22635	1.13658e-25	7.54877e-25	144.081	155.197	24.2956	11.0567	13.2911
ENSG00000118407.15	FILIP1	65.1596	139.874	15.3501	-3.17434	1.29544e-25	8.58183e-25	142.964	136.783	9.71824	19.3491	16.9831
ENSG00000130751.10	NPAS1	56.0528	124.895	10.1583	-3.62407	1.49091e-25	9.86408e-25	111.691	138.099	11.6619	9.21388	9.59912
ENSG00000131778.19	CHD1L	334.848	499.892	224.819	-1.14909	1.90808e-25	1.25758e-24	480.27	519.514	208.942	235.875	229.64
ENSG00000142892.15	PIGK	657.415	953.73	459.872	-1.05264	1.97077e-25	1.29834e-24	1005.22	902.244	493.687	400.804	485.125
ENSG00000130529.16	TRPM4	218.666	359.82	124.563	-1.53479	2.24076e-25	1.47308e-24	339.54	380.1	144.802	115.173	113.713
ENSG00000110446.12	SLC15A3	145.457	258.156	70.3239	-1.86442	2.31412e-25	1.52002e-24	262.473	253.838	64.1404	62.6544	84.1769
ENSG00000164066.13	INTU	103.074	195.651	41.3567	-2.25516	2.38653e-25	1.56692e-24	188.757	202.545	49.563	40.5411	33.9661
ENSG00000198892.7	SHISA4	169.519	283.469	93.5519	-1.59415	4.12038e-25	2.68596e-24	273.642	293.295	85.5205	97.6671	97.468
ENSG00000175416.16	CLTB	575.523	856.157	388.434	-1.13555	4.51192e-25	2.93872e-24	756.146	956.169	389.702	365.791	409.808
ENSG00000261327.5	AC134312.5	49.1895	112.958	6.67686	-4.08817	5.32848e-25	3.46039e-24	112.808	113.109	5.83095	8.29249	5.90715
ENSG00000002549.13	LAP3	379.784	560.377	259.388	-1.10993	5.6116e-25	3.6412e-24	584.142	536.612	235.181	272.731	270.252
ENSG00000171303.7	KCNK3	59.2026	128.433	13.0487	-3.28508	5.66864e-25	3.67666e-24	138.496	118.37	11.6619	11.978	15.5063
ENSG00000172889.16	EGFL7	61.54	132.974	13.9173	-3.2825	6.42566e-25	4.16418e-24	131.795	134.153	19.4365	11.978	10.3375
ENSG00000105376.5	ICAM5	93.4042	177.906	37.0698	-2.25747	7.58836e-25	4.90946e-24	166.419	189.392	35.9575	36.8555	38.3965
ENSG00000185860.13	CCDC190	48.2514	115.391	3.492	-5.05785	9.23188e-25	5.96282e-24	115.041	115.74	2.91547	4.60694	2.95357
ENSG00000188677.15	PARVB	219.652	349.324	133.204	-1.39789	9.9404e-25	6.4151e-24	354.059	344.589	139.943	140.051	119.62
ENSG00000026297.16	RNASET2	84.0097	165.312	29.8082	-2.4583	1.03059e-24	6.64544e-24	167.536	163.088	28.1829	25.7989	35.4429
ENSG00000176890.16	TYMS	141.075	245.959	71.1523	-1.79734	1.17872e-24	7.59112e-24	259.122	232.795	80.6614	66.3399	66.4554
ENSG00000090006.18	LTBP4	204.175	330.138	120.2	-1.45613	1.24657e-24	8.02474e-24	318.318	341.959	130.224	107.802	122.573
ENSG00000137628.18	DDX60	232.55	369.69	141.123	-1.389	1.26911e-24	8.1665e-24	398.736	340.643	135.084	139.13	149.156
ENSG00000140450.9	ARRDC4	321.57	490.931	208.663	-1.23427	1.40308e-24	9.02104e-24	447.88	533.981	220.604	208.234	197.151
ENSG00000006016.11	CRLF1	127.713	234.743	56.36	-2.05693	1.72094e-24	1.10464e-23	266.941	202.545	49.563	58.9688	60.5483
ENSG00000129422.14	MTUS1	285.945	429.548	190.21	-1.17458	1.85612e-24	1.19091e-23	435.594	423.503	194.365	180.592	195.674
ENSG00000198932.13	GPRASP1	111.995	201.596	52.262	-1.94933	2.11806e-24	1.35729e-23	203.277	199.914	54.4222	50.6763	51.6876
ENSG00000178685.14	PARP10	356.048	523.258	244.574	-1.09214	2.47508e-24	1.58215e-23	505.959	540.558	241.984	230.347	261.391
ENSG00000127951.8	FGL2	63.7721	143.016	10.943	-3.68734	2.48625e-24	1.58864e-23	174.237	111.794	10.6901	7.3711	14.7679
ENSG00000126218.12	F10	92.8994	179.581	35.1115	-2.33756	2.69723e-24	1.72203e-23	169.77	189.392	29.1547	34.0913	42.0884
ENSG00000196700.9	ZNF512B	364.995	535.471	251.344	-1.08743	4.05321e-24	2.56974e-23	546.167	524.775	245.872	234.954	273.206
ENSG00000155816.21	FMN2	415.704	599.912	292.898	-1.03325	4.14928e-24	2.6285e-23	627.702	572.123	292.519	274.574	311.602
ENSG00000101871.16	MID1	170.566	290.061	90.903	-1.67738	4.15793e-24	2.6329e-23	310.5	269.621	103.013	77.3966	92.2992
ENSG00000247627.2	MTND4P12	57.7243	125.344	12.6448	-3.3084	4.26922e-24	2.70227e-23	136.263	114.425	9.71824	15.6636	12.5527
ENSG00000182628.13	SKA2	244.996	383.985	152.337	-1.33761	4.40679e-24	2.78821e-23	415.489	352.48	147.717	159.4	149.894
ENSG00000082684.16	SEMA5B	257.048	642.621	0	-11.9691	4.51224e-24	2.85376e-23	635.52	649.721	0	0	0
ENSG00000143416.21	SELENBP1	90.0608	175.129	33.3485	-2.39467	5.11035e-24	3.22677e-23	197.692	152.566	34.0138	31.3272	34.7045
ENSG00000120937.9	NPPB	67.6251	166.826	1.49146	-6.85224	8.13973e-24	5.11872e-23	165.302	168.349	0.971824	2.76416	0.738394
ENSG00000110057.8	UNC93B1	138.752	239.069	71.874	-1.73241	8.48274e-24	5.33226e-23	225.615	252.523	68.9995	76.4752	70.1474
ENSG00000112541.18	PDE10A	329.841	491.082	222.347	-1.14708	9.85236e-24	6.17566e-23	475.802	506.362	230.322	235.875	200.843
ENSG00000074219.14	TEAD2	134.584	235.374	67.3912	-1.80312	1.05861e-23	6.62757e-23	252.421	218.327	68.9995	60.8116	72.3626
ENSG00000099260.11	PALMD	77.7992	161.079	22.2792	-2.87647	1.6124e-23	1.00661e-22	148.549	173.61	23.3238	29.4844	14.0295
ENSG00000048140.18	TSPAN17	319.004	473.687	215.882	-1.13595	2.04522e-23	1.27323e-22	479.153	468.22	236.153	198.098	213.396
ENSG00000109063.15	MYH3	92.8219	181.455	33.7333	-2.44605	2.13901e-23	1.33001e-22	170.887	192.023	38.873	38.6983	23.6286
ENSG00000154146.13	NRGN	52.8367	129.091	2.00053	-6.00213	2.16722e-23	1.34701e-22	138.496	119.685	1.94365	1.84278	2.21518
ENSG00000108823.16	SGCA	375.332	553.388	256.628	-1.10326	2.25518e-23	1.40056e-22	551.752	555.025	252.674	232.19	285.02
ENSG00000148450.13	MSRB2	142.587	246.392	73.3846	-1.73719	2.30125e-23	1.4286e-22	246.836	245.947	67.0559	68.1827	84.9153
ENSG00000198858.10	R3HDM4	239.46	375.629	148.681	-1.32906	2.84046e-23	1.75981e-22	354.059	397.198	141.886	140.972	163.185
ENSG00000105825.14	TFPI2	81.177	158.574	29.5789	-2.4115	3.10111e-23	1.91747e-22	161.951	155.197	29.1547	24.8775	34.7045
ENSG00000168118.12	RAB4A	246.327	376.375	159.628	-1.23417	3.24733e-23	2.00707e-22	375.281	377.47	149.661	163.086	166.139
ENSG00000168528.12	SERINC2	187.169	302.294	110.419	-1.44757	3.3468e-23	2.06773e-22	306.032	298.556	101.07	110.567	119.62
ENSG00000069399.15	BCL3	193.312	310.06	115.48	-1.42536	3.42906e-23	2.11771e-22	292.63	327.491	120.506	115.173	110.759
ENSG00000013297.12	CLDN11	109.052	197.812	49.8787	-1.98525	3.51987e-23	2.17206e-22	208.862	186.762	51.5067	44.2266	53.9027
ENSG00000132669.14	RIN2	435.003	637.527	299.987	-1.09077	3.55569e-23	2.19329e-22	700.301	574.753	311.956	283.787	304.218
ENSG00000267328.1	AC002398.2	470.839	955.556	147.695	-2.69139	4.42114e-23	2.71848e-22	755.029	1156.08	148.689	128.994	165.4
ENSG00000149582.16	TMEM25	166.072	272.451	95.1526	-1.5188	5.95524e-23	3.65307e-22	279.227	265.675	89.4078	102.274	93.776
ENSG00000169919.17	GUSB	253.435	389.068	163.013	-1.24883	6.04418e-23	3.70616e-22	373.047	405.089	160.351	152.95	175.738
ENSG00000235847.2	LDHAP7	58.1553	122.651	15.1586	-3.02908	6.05855e-23	3.7135e-22	129.561	115.74	16.521	15.6636	13.2911
ENSG00000170961.7	HAS2	48.0749	116.174	2.67579	-5.48189	6.28034e-23	3.84792e-22	128.444	103.903	1.94365	4.60694	1.47679
ENSG00000109072.14	VTN	75.6312	148.585	26.9956	-2.45715	6.46713e-23	3.95767e-22	148.549	148.62	29.1547	23.0347	28.7974
ENSG00000006638.13	TBXA2R	60.2577	125.417	16.8183	-2.90283	7.24132e-23	4.42414e-22	120.626	130.207	16.521	18.4278	15.5063
ENSG00000101333.18	PLCB4	326.824	473.984	228.717	-1.05273	9.51568e-23	5.79354e-22	475.802	472.166	239.069	221.133	225.948
ENSG00000168679.18	SLC16A4	255.498	384.032	169.81	-1.17874	1.09647e-22	6.66264e-22	385.333	382.731	170.069	173.221	166.139
ENSG00000114923.17	SLC4A3	58.3799	122.849	15.4006	-2.98632	1.09837e-22	6.67157e-22	127.327	118.37	12.6337	16.585	16.9831
ENSG00000077157.22	PPP1R12B	241.809	372.826	154.464	-1.26682	1.12272e-22	6.81682e-22	370.813	374.839	156.464	140.051	166.877
ENSG00000176678.6	FOXL1	222.16	355.18	133.481	-1.40803	1.18499e-22	7.18931e-22	347.358	363.002	112.732	151.108	136.603
ENSG00000172260.15	NEGR1	56.3129	120.777	13.3369	-3.18595	1.40873e-22	8.52335e-22	128.444	113.109	10.6901	17.5064	11.8143
ENSG00000156869.14	FRRS1	90.4045	168.924	38.0585	-2.15246	1.725e-22	1.04085e-21	178.705	159.142	39.8448	35.9341	38.3965
ENSG00000183098.11	GPC6	84.5297	161.826	32.9992	-2.30676	1.92897e-22	1.16256e-21	169.77	153.881	38.873	31.3272	28.7974
ENSG00000168427.9	KLHL30	241.447	369.178	156.294	-1.24395	2.00807e-22	1.20882e-21	367.462	370.894	156.464	167.693	144.725
ENSG00000155115.7	GTF3C6	266.561	405.164	174.158	-1.21372	2.21015e-22	1.32841e-21	406.554	403.774	154.52	183.356	184.598
ENSG00000114544.17	SLC41A3	310.846	455.816	214.2	-1.09199	2.31352e-22	1.39e-21	443.412	468.22	224.491	216.526	201.581
ENSG00000179855.9	GIPC3	44.1736	104.843	3.72757	-4.8067	2.45954e-22	1.47658e-21	100.522	109.164	5.83095	0.921388	4.43036
ENSG00000223953.6	C1QTNF5	102.102	202.932	34.8822	-2.52409	2.5325e-22	1.51979e-21	158.601	247.262	30.1266	33.17	41.35
ENSG00000135480.16	KRT7	68.6136	142.911	19.0818	-2.90216	2.55336e-22	1.53172e-21	116.158	169.664	19.4365	19.3491	18.4598
ENSG00000146828.18	SLC12A9	149.962	251.491	82.2761	-1.61674	2.95525e-22	1.7687e-21	241.252	261.73	91.3515	80.1607	75.3162
ENSG00000120318.16	ARAP3	133.533	230.781	68.7015	-1.75863	2.9834e-22	1.78485e-21	230.083	231.48	77.7459	70.0255	58.3331
ENSG00000141560.15	FN3KRP	105.916	189.372	50.2783	-1.91432	3.03585e-22	1.81483e-21	185.407	193.338	53.4503	47.9122	49.4724
ENSG00000214548.18	MEG3	216.474	350.514	127.114	-1.47219	3.16825e-22	1.8918e-21	340.657	360.372	139.943	137.287	104.114
ENSG00000143355.16	LHX9	86.2702	166.293	32.9216	-2.34017	3.4737e-22	2.07099e-21	178.705	153.881	27.2111	40.5411	31.0125
ENSG00000171793.16	CTPS1	404.114	587.689	281.731	-1.05697	4.41365e-22	2.62129e-21	609.831	565.547	250.731	286.552	307.91
ENSG00000169071.15	ROR2	141.911	328.244	17.6895	-4.19293	4.53833e-22	2.6943e-21	361.878	294.61	9.71824	17.5064	25.8438
ENSG00000135503.13	ACVR1B	287.291	432.424	190.536	-1.17753	5.63855e-22	3.34236e-21	403.203	461.644	195.337	176.906	199.366
ENSG00000164611.13	PTTG1	57.6334	123.731	13.5684	-3.17362	5.87946e-22	3.48383e-21	139.613	107.848	9.71824	14.7422	16.2447
ENSG00000040275.17	SPDL1	142.869	241.194	77.32	-1.64971	6.33775e-22	3.75252e-21	253.538	228.849	85.5205	75.5538	70.8858
ENSG00000010610.10	CD4	156.253	261.021	86.4076	-1.60269	8.52648e-22	5.03115e-21	252.421	269.621	92.3233	93.0602	73.8394
ENSG00000171848.16	RRM2	50.699	115.328	7.61309	-3.85959	9.51201e-22	5.60626e-21	108.34	122.316	2.91547	7.3711	12.5527
ENSG00000149798.5	CDC42EP2	221.045	340.911	141.135	-1.2782	9.61733e-22	5.66618e-21	345.124	336.698	150.633	142.815	129.957
ENSG00000118707.11	TGIF2	88.6793	167.608	36.0599	-2.23263	1.29191e-21	7.597e-21	178.705	156.512	41.7884	36.8555	29.5357
ENSG00000163584.18	RPL22L1	176.416	287.441	102.399	-1.49539	1.5946e-21	9.36628e-21	288.162	286.719	100.098	117.016	90.084
ENSG00000166592.12	RRAD	165.714	278.255	90.6865	-1.61637	1.73698e-21	1.01931e-20	243.486	313.024	94.2669	92.1388	85.6537
ENSG00000185340.15	GAS2L1	190.395	312.247	109.16	-1.51754	2.06228e-21	1.20585e-20	327.254	297.241	124.393	89.3746	113.713
ENSG00000158555.15	GDPD5	122.754	216.423	60.3081	-1.84628	2.08891e-21	1.2205e-20	206.628	226.219	71.915	50.6763	58.3331
ENSG00000121753.13	ADGRB2	55.591	118.407	13.7134	-3.10526	2.45735e-21	1.43253e-20	132.912	103.903	14.5774	11.0567	15.5063
ENSG00000110492.16	MDK	76.7704	151.079	27.2312	-2.48594	2.49816e-21	1.45577e-20	157.484	144.675	25.2674	35.0127	21.4134
ENSG00000143387.14	CTSK	264.597	400.19	174.202	-1.20514	2.5141e-21	1.46396e-20	425.541	374.839	189.506	164.007	169.092
ENSG00000006118.15	TMEM132A	105.717	192.138	48.1034	-1.98501	2.58149e-21	1.50207e-20	176.471	207.806	44.7039	44.2266	55.3795
ENSG00000214193.11	SH3D21	89.6896	180.348	29.2505	-2.6307	2.84637e-21	1.65557e-20	146.315	214.382	38.873	23.0347	25.8438
ENSG00000179954.16	SSC5D	150.465	265.833	73.5529	-1.84013	3.1884e-21	1.85035e-20	227.849	303.817	66.084	68.1827	86.3921
ENSG00000197905.10	TEAD4	62.5843	131.173	16.8582	-2.96419	3.3058e-21	1.91704e-20	115.041	147.305	22.352	11.978	16.2447
ENSG00000189337.17	KAZN	273.842	415.858	179.164	-1.21498	3.55371e-21	2.0585e-20	389.8	441.916	199.224	164.007	174.261
ENSG00000116991.11	SIPA1L2	240.67	361.746	159.952	-1.17685	4.37737e-21	2.53182e-20	369.696	353.796	161.323	153.872	164.662
ENSG00000197442.10	MAP3K5	211.531	328.515	133.541	-1.30271	4.70634e-21	2.71702e-20	344.007	313.024	144.802	124.387	131.434
ENSG00000108106.14	UBE2S	257.489	392.554	167.446	-1.22104	5.93639e-21	3.41695e-20	370.813	414.296	153.548	164.928	183.86
ENSG00000144118.14	RALB	364.946	539.886	248.319	-1.1177	6.08825e-21	3.50176e-20	526.063	553.71	213.801	280.102	251.054
ENSG00000136261.15	BZW2	257.324	395.723	165.058	-1.26389	6.69475e-21	3.84774e-20	416.606	374.839	147.717	187.963	159.493
ENSG00000001617.12	SEMA3F	72.7854	146.152	23.8741	-2.59197	7.93393e-21	4.54983e-20	146.315	145.99	15.5492	25.7989	30.2741
ENSG00000164088.18	PPM1M	203.773	322.383	124.7	-1.36778	9.88095e-21	5.65173e-20	309.383	335.382	109.816	140.972	123.312
ENSG00000162437.14	RAVER2	122.453	208.73	64.9342	-1.68443	9.9516e-21	5.69004e-20	204.394	213.066	62.1967	69.1041	63.5019
ENSG00000160446.19	ZDHHC12	108.252	191.309	52.8806	-1.85714	1.01436e-20	5.79768e-20	193.225	189.392	47.6194	60.8116	50.2108
ENSG00000112759.19	SLC29A1	274.926	438.89	165.616	-1.39764	1.03152e-20	5.89139e-20	426.658	451.122	129.253	177.828	189.767
ENSG00000125378.16	BMP4	145.553	241.6	81.5213	-1.56137	1.18715e-20	6.77028e-20	226.732	256.469	75.8023	83.8463	84.9153
ENSG00000164161.10	HHIP	46.9532	103.392	9.32742	-3.4522	1.42958e-20	8.12295e-20	109.457	97.3267	9.71824	6.44971	11.8143
ENSG00000115325.14	DOK1	297.03	435.018	205.039	-1.08376	1.66203e-20	9.41613e-20	411.022	459.014	199.224	216.526	199.366
ENSG00000169507.9	SLC38A11	47.3852	115.923	1.69341	-6.06584	1.71165e-20	9.69372e-20	101.639	130.207	1.94365	0.921388	2.21518
ENSG00000128872.10	TMOD2	101.566	181.841	48.0486	-1.91977	1.80624e-20	1.02257e-19	188.757	174.925	41.7884	54.3619	47.9956
ENSG00000169738.8	DCXR	116.151	211.883	52.3297	-2.01176	1.91057e-20	1.08005e-19	213.329	210.436	36.9293	65.4185	54.6411
ENSG00000136274.9	NACAD	63.9255	129.686	20.0853	-2.67476	2.00891e-20	1.13482e-19	131.795	127.577	20.4083	14.7422	25.1054
ENSG00000254635.6	WAC-AS1	327.048	466.985	233.757	-1.00062	2.07749e-20	1.1727e-19	465.75	468.22	232.266	246.011	222.995
ENSG00000115129.14	TP53I3	110.486	192.488	55.8171	-1.78652	2.15414e-20	1.21553e-19	202.16	182.816	57.3376	52.5191	57.5947
ENSG00000245910.8	SNHG6	254.891	378.285	172.628	-1.13393	2.15868e-20	1.21765e-19	368.579	387.991	176.872	177.828	163.185
ENSG00000276043.5	UHRF1	53.2507	113.418	13.1392	-3.08069	2.21724e-20	1.25022e-19	115.041	111.794	9.71824	11.978	17.7214
ENSG00000186469.8	GNG2	41.7186	100.213	2.72212	-5.12765	2.25186e-20	1.26928e-19	86.0018	114.425	0.971824	2.76416	4.43036
ENSG00000267534.4	S1PR2	117.312	200.578	61.8019	-1.69594	2.73879e-20	1.53927e-19	199.926	201.229	62.1967	58.9688	64.2402
ENSG00000143847.15	PPFIA4	72.5365	144.811	24.3534	-2.5646	2.81527e-20	1.58168e-19	131.795	157.827	29.1547	16.585	27.3206
ENSG00000129219.14	PLD2	82.2536	154.999	33.7567	-2.18959	3.17318e-20	1.77825e-19	142.964	167.034	29.1547	35.9341	36.1813
ENSG00000021826.17	CPS1	140.754	231.799	80.057	-1.53329	3.19916e-20	1.79216e-19	233.434	230.164	83.5769	74.6324	81.9617
ENSG00000198768.11	APCDD1L	265.613	395.185	179.232	-1.13542	3.8884e-20	2.1759e-19	370.813	419.557	177.844	172.3	187.552
ENSG00000198736.12	MSRB1	118.022	202.191	61.9093	-1.70167	3.93733e-20	2.20249e-19	196.576	207.806	61.2249	58.0474	66.4554
ENSG00000137103.20	TMEM8B	106.639	187.598	52.6661	-1.82584	4.82682e-20	2.69228e-19	183.173	192.023	45.6757	56.2047	56.1179
ENSG00000025772.8	TOMM34	172.874	274.001	105.456	-1.37217	4.84079e-20	2.6991e-19	269.175	278.828	102.042	101.353	112.974
ENSG00000162267.12	ITIH3	50.8496	107.176	13.299	-3.01252	5.66002e-20	3.15022e-19	103.872	110.479	15.5492	11.0567	13.2911
ENSG00000089060.12	SLC8B1	203.072	313.364	129.545	-1.27716	6.80253e-20	3.76851e-19	329.487	297.241	123.422	138.208	127.004
ENSG00000283154.2	IQCJ-SCHIP1	150.862	248.563	85.7286	-1.52628	1.00831e-19	5.5561e-19	244.603	252.523	80.6614	78.318	98.2064
ENSG00000276107.1	AC037198.1	38.1217	90.871	2.95555	-4.97449	1.03433e-19	5.69748e-19	94.9371	86.8049	3.8873	2.76416	2.21518
ENSG00000196968.11	FUT11	264.462	385.608	183.698	-1.07058	1.15e-19	6.32789e-19	389.8	381.415	187.562	179.671	183.86
ENSG00000170214.5	ADRA1B	65.6385	130.046	22.7001	-2.5058	1.16687e-19	6.41838e-19	135.146	124.946	22.352	18.4278	27.3206
ENSG00000169744.13	LDB2	91.9172	175.735	36.0389	-2.2794	1.2684e-19	6.96946e-19	168.653	182.816	43.7321	23.0347	41.35
ENSG00000260604.2	AL590004.3	63.4726	127.118	21.0423	-2.60971	1.59885e-19	8.75413e-19	138.496	115.74	26.2393	18.4278	18.4598
ENSG00000169857.9	AVEN	297.74	430.216	209.422	-1.0382	1.62549e-19	8.88742e-19	413.255	447.177	221.576	199.941	206.75
ENSG00000139211.7	AMIGO2	206.538	317.78	132.378	-1.26864	1.80293e-19	9.84717e-19	309.383	326.176	141.886	136.365	118.881
ENSG00000103005.12	USB1	199.689	312.012	124.807	-1.322	2.20321e-19	1.2008e-18	337.306	286.719	126.337	115.173	132.911
ENSG00000186369.10	LINC00643	38.864	89.1956	5.30954	-4.03636	2.44248e-19	1.3298e-18	91.5864	86.8049	4.85912	3.68555	7.38394
ENSG00000141258.13	SGSM2	369.667	541.969	254.799	-1.08707	2.68071e-19	1.45797e-18	502.608	581.33	282.801	223.897	257.699
ENSG00000134285.11	FKBP11	203.471	313.787	129.927	-1.27513	3.02159e-19	1.64222e-18	339.54	288.034	131.196	127.152	131.434
ENSG00000077092.19	RARB	132.982	229.81	68.4305	-1.73823	3.17103e-19	1.72223e-18	196.576	263.045	65.1122	66.3399	73.8394
ENSG00000162688.17	AGL	272.019	400.289	186.506	-1.10429	3.28082e-19	1.78123e-18	424.425	376.154	175.9	199.02	184.598
ENSG00000250508.1	LINC02701	45.4911	102.463	7.50988	-3.77759	3.30727e-19	1.79496e-18	127.327	77.5983	7.77459	7.3711	7.38394
ENSG00000203780.12	FANK1	63.6455	125.777	22.2246	-2.49001	4.15186e-19	2.24705e-18	123.977	127.577	23.3238	17.5064	25.8438
ENSG00000157600.12	TMEM164	73.8927	139.811	29.947	-2.21291	4.41138e-19	2.38417e-18	136.263	143.36	29.1547	26.7202	33.9661
ENSG00000090889.12	KIF4A	41.0462	91.0066	7.7392	-3.54784	4.69448e-19	2.53365e-18	86.0018	96.0114	6.80277	8.29249	8.12233
ENSG00000165124.18	SVEP1	55.5723	112.823	17.4052	-2.70486	4.84206e-19	2.61147e-18	121.743	103.903	18.4647	17.5064	16.2447
ENSG00000128510.12	CPA4	460.874	658.142	329.361	-1.00295	5.1237e-19	2.76049e-18	631.052	685.232	348.885	355.656	283.543
ENSG00000138449.11	SLC40A1	150.868	245.598	87.7139	-1.49262	5.41961e-19	2.91688e-18	255.772	235.425	100.098	81.0821	81.9617
ENSG00000106785.15	TRIM14	91.5766	165.897	42.03	-1.98895	5.55852e-19	2.98852e-18	183.173	148.62	45.6757	40.5411	39.8733
ENSG00000174032.17	SLC25A30	99.5172	174.221	49.7147	-1.80564	5.96706e-19	3.2004e-18	170.887	177.555	45.6757	52.5191	50.9492
ENSG00000121851.13	POLR3GL	221.756	337.957	144.288	-1.23329	6.80701e-19	3.64333e-18	333.955	341.959	144.802	160.321	127.742
ENSG00000116157.6	GPX7	157.168	252.086	93.8903	-1.42341	6.85883e-19	3.6698e-18	234.55	269.621	98.1542	91.2174	92.2992
ENSG00000099219.14	ERMP1	135.337	222.133	77.4737	-1.5236	7.58973e-19	4.05387e-18	231.2	213.066	83.5769	72.7896	76.0545
ENSG00000100321.15	SYNGR1	170.734	271.172	103.775	-1.38354	8.92728e-19	4.75191e-18	271.408	270.936	90.3797	116.095	104.852
ENSG00000198721.13	ECI2	379.094	547.397	266.892	-1.03614	9.47068e-19	5.03597e-18	567.389	527.405	232.266	300.372	268.037
ENSG00000168005.9	SPINDOC	115.212	200.902	58.0851	-1.77942	1.00341e-18	5.33191e-18	211.095	190.708	49.563	55.2833	69.409
ENSG00000160410.15	SHKBP1	251.327	383.228	163.394	-1.23672	1.03549e-18	5.50046e-18	416.606	349.85	158.407	183.356	148.417
ENSG00000188313.13	PLSCR1	279.542	415.07	189.19	-1.13674	1.04189e-18	5.53259e-18	457.932	372.209	181.731	195.334	190.506
ENSG00000011523.14	CEP68	172.291	275.416	103.542	-1.40659	1.09216e-18	5.79556e-18	268.058	282.773	87.4642	116.095	107.067
ENSG00000139973.16	SYT16	39.9125	97.1496	1.7544	-5.81015	1.09565e-18	5.81211e-18	98.2878	96.0114	1.94365	1.84278	1.47679
ENSG00000140950.16	MEAK7	163.454	262.389	97.498	-1.42964	1.19062e-18	6.29645e-18	281.461	243.317	103.985	86.6104	101.898
ENSG00000158747.15	NBL1	319.588	475.852	215.412	-1.13728	1.20464e-18	6.36843e-18	417.723	533.981	205.055	217.448	223.733
ENSG00000213853.10	EMP2	223.843	337.811	147.865	-1.19397	1.40207e-18	7.39202e-18	365.229	310.393	144.802	147.422	151.371
ENSG00000096092.6	TMEM14A	132.138	220.27	73.3843	-1.59071	1.48216e-18	7.80363e-18	207.745	232.795	74.8305	81.0821	64.2402
ENSG00000197121.15	PGAP1	127.916	211.522	72.179	-1.54897	1.59986e-18	8.41763e-18	209.978	213.066	75.8023	65.4185	75.3162
ENSG00000263874.2	LINC00672	70.5168	135.37	27.2816	-2.32674	1.66264e-18	8.74197e-18	141.847	128.892	28.1829	32.2486	21.4134
ENSG00000214765.8	SEPTIN7P2	157.471	253.913	93.1773	-1.45059	1.92415e-18	1.0093e-17	265.824	242.001	85.5205	106.881	87.1305
ENSG00000131759.18	RARA	241.085	362.549	160.108	-1.17094	2.63355e-18	1.37443e-17	338.423	386.676	148.689	156.636	174.999
ENSG00000138180.16	CEP55	54.2903	117.39	12.2241	-3.27298	2.76045e-18	1.43921e-17	129.561	105.218	6.80277	20.2705	9.59912
ENSG00000198618.5	PPIAP22	1696.33	2830.41	940.281	-1.58918	2.78177e-18	1.44983e-17	2947.52	2713.31	758.995	1019.98	1041.87
ENSG00000112276.14	BVES	70.4591	137.071	26.0511	-2.3949	3.23355e-18	1.68134e-17	159.718	114.425	24.2956	25.7989	28.059
ENSG00000226137.5	BAIAP2-DT	82.9709	150.693	37.8229	-1.99256	3.68113e-18	1.91022e-17	139.613	161.773	36.9293	39.6197	36.9197
ENSG00000226445.2	BX322234.1	63.7164	123.345	23.9642	-2.3752	3.76754e-18	1.95441e-17	121.743	124.946	28.1829	23.0347	20.675
ENSG00000197093.11	GAL3ST4	93.84	169.545	43.3702	-1.97224	3.79091e-18	1.96521e-17	186.523	152.566	37.9011	51.5977	40.6117
ENSG00000239697.11	TNFSF12	119.232	208.892	59.4589	-1.8005	3.80039e-18	1.96881e-17	209.978	207.806	43.7321	64.4971	70.1474
ENSG00000112414.15	ADGRG6	64.3608	127.379	22.3486	-2.53097	3.81272e-18	1.97453e-17	142.964	111.794	27.2111	22.1133	17.7214
ENSG00000146411.6	SLC2A12	54.7085	111.607	16.7763	-2.72433	3.978e-18	2.05876e-17	120.626	102.588	17.4928	12.8994	19.9366
ENSG00000178776.5	C5orf46	37.1429	88.4492	2.93873	-4.92968	4.29881e-18	2.22182e-17	70.3651	106.533	2.91547	3.68555	2.21518
ENSG00000150636.17	CCDC102B	58.7349	116.372	20.3103	-2.52682	4.51259e-18	2.32997e-17	126.21	106.533	19.4365	23.0347	18.4598
ENSG00000084731.15	KIF3C	241.346	355.874	164.995	-1.10352	4.56859e-18	2.3581e-17	339.54	372.209	161.323	159.4	174.261
ENSG00000165996.14	HACD1	199.12	305.374	128.285	-1.2531	4.67668e-18	2.41229e-17	330.604	280.143	121.478	132.68	130.696
ENSG00000170312.16	CDK1	35.6861	84.6653	3.03336	-4.86164	5.25504e-18	2.70521e-17	75.9497	93.381	4.85912	2.76416	1.47679
ENSG00000243646.10	IL10RB	189.825	298.818	117.163	-1.3402	5.60121e-18	2.8815e-17	285.928	311.708	106.901	108.724	135.864
ENSG00000110042.8	DTX4	40.5604	89.6914	7.80645	-3.52447	6.06673e-18	3.11684e-17	86.0018	93.381	10.6901	4.60694	8.12233
ENSG00000162302.13	RPS6KA4	276.16	398.661	194.493	-1.03221	6.14953e-18	3.15729e-17	390.917	406.405	200.196	178.749	204.535
ENSG00000206341.7	HLA-H	289.786	415.2	206.177	-1.0072	6.28983e-18	3.22825e-17	389.8	440.6	207.97	204.548	206.012
ENSG00000149260.18	CAPN5	204.765	310.969	133.962	-1.21121	6.40488e-18	3.28512e-17	319.435	302.502	133.14	122.545	146.202
ENSG00000132109.10	TRIM21	150.246	245.734	86.587	-1.49661	8.53376e-18	4.35686e-17	246.836	244.632	69.9713	93.0602	96.7296
ENSG00000169760.17	NLGN1	46.6642	98.4283	12.1547	-3.00116	9.22441e-18	4.70482e-17	106.106	90.7505	9.71824	11.978	14.7679
ENSG00000163382.13	NAXE	195.024	301.386	124.115	-1.27139	9.59361e-18	4.89151e-17	279.227	323.545	114.675	122.545	135.126
ENSG00000165512.5	ZNF22	161.24	257.263	97.2249	-1.40044	9.70353e-18	4.9443e-17	272.525	242.001	84.5487	102.274	104.852
ENSG00000270225.1	MTCO2P22	46.523	114.597	1.14015	-6.63794	9.78135e-18	4.98232e-17	123.977	105.218	1.94365	0	1.47679
ENSG00000167244.21	IGF2	125.752	206.162	72.1454	-1.5136	1.10728e-17	5.63273e-17	211.095	201.229	73.8586	67.2613	75.3162
ENSG00000159164.10	SV2A	308.235	459.47	207.411	-1.15255	1.11093e-17	5.64943e-17	505.959	412.981	233.238	185.199	203.797
ENSG00000154258.17	ABCA9	114.929	192.102	63.4805	-1.59998	1.13168e-17	5.75118e-17	184.29	199.914	67.0559	63.5758	59.8099
ENSG00000241399.7	CD302	83.1998	152.061	37.2927	-2.03384	1.25132e-17	6.34672e-17	168.653	135.468	41.7884	33.17	36.9197
ENSG00000173267.14	SNCG	45.2473	96.565	11.0355	-3.1322	1.41136e-17	7.15609e-17	82.6511	110.479	12.6337	10.1353	10.3375
ENSG00000183856.11	IQGAP3	39.8923	90.5108	6.14666	-3.89678	1.45242e-17	7.35945e-17	91.5864	89.4353	10.6901	1.84278	5.90715
ENSG00000169946.14	ZFPM2	123.833	206.1	68.9881	-1.57312	1.56857e-17	7.93763e-17	204.394	207.806	58.3095	75.5538	73.101
ENSG00000137804.14	NUSAP1	34.9906	79.7646	5.14122	-3.94529	1.7476e-17	8.82915e-17	79.3004	80.2287	5.83095	3.68555	5.90715
ENSG00000162630.6	B3GALT2	137.139	342.388	0.307129	-10.1001	1.77928e-17	8.98339e-17	350.709	334.067	0	0.921388	0
ENSG00000184838.15	PRR16	128.049	213.782	70.8936	-1.59503	1.79093e-17	9.0363e-17	228.966	198.599	79.6896	59.8902	73.101
ENSG00000172123.13	SLFN12	170.961	268.072	106.22	-1.33822	1.9937e-17	1.00398e-16	291.513	244.632	110.788	98.5885	109.282
ENSG00000213928.9	IRF9	349.331	509.976	242.234	-1.07879	2.18597e-17	1.09937e-16	574.09	445.861	256.562	229.426	240.716
ENSG00000185305.11	ARL15	127.904	215.52	69.4925	-1.64263	2.43957e-17	1.22453e-16	239.018	192.023	80.6614	63.5758	64.2402
ENSG00000134575.13	ACP2	249.685	359.413	176.533	-1.02704	2.68034e-17	1.34277e-16	366.345	352.48	174.928	179.671	174.999
ENSG00000203668.3	CHML	212.135	316.229	142.738	-1.15391	3.9871e-17	1.98586e-16	319.435	313.024	154.52	143.736	129.957
ENSG00000173218.15	VANGL1	164.93	256.914	103.607	-1.30307	4.25491e-17	2.11857e-16	246.836	266.991	98.1542	100.431	112.236
ENSG00000253910.2	PCDHGB2	140.259	232.06	79.0576	-1.55523	4.35245e-17	2.16366e-16	237.901	226.219	93.2951	62.6544	81.2233
ENSG00000164877.19	MICALL2	302.595	452.377	202.741	-1.15716	4.65172e-17	2.31095e-16	415.489	489.264	233.238	174.142	200.843
ENSG00000163590.14	PPM1L	131.159	212.775	76.7482	-1.46683	5.4991e-17	2.7258e-16	203.277	222.273	69.9713	82.0035	78.2697
ENSG00000162383.13	SLC1A7	36.7078	81.4764	6.86199	-3.55851	6.20624e-17	3.06748e-16	74.8328	88.1201	5.83095	7.3711	7.38394
ENSG00000212747.5	RTL8B	254.549	373.5	175.249	-1.09844	6.7715e-17	3.33835e-16	407.671	339.328	182.703	176.906	166.139
ENSG00000198829.6	SUCNR1	83.7567	198.433	7.30596	-4.72232	8.45676e-17	4.15596e-16	216.68	180.186	2.91547	6.44971	12.5527
ENSG00000109084.14	TMEM97	52.4677	103.888	18.1878	-2.51514	8.75098e-17	4.29919e-16	103.872	103.903	17.4928	19.3491	17.7214
ENSG00000154822.18	PLCL2	70.653	130.74	30.5949	-2.0876	9.36925e-17	4.60148e-16	127.327	134.153	31.0984	26.7202	33.9661
ENSG00000235655.3	H3P6	217.143	347.43	130.285	-1.41319	9.7021e-17	4.75891e-16	397.619	297.241	108.844	137.287	144.725
ENSG00000080546.13	SESN1	246.296	359.34	170.933	-1.07357	1.0057e-16	4.92676e-16	381.982	336.698	177.844	158.479	176.476
ENSG00000167767.14	KRT80	32.499	75.918	3.55299	-4.44862	1.05964e-16	5.18608e-16	78.1835	73.6526	2.91547	5.52833	2.21518
ENSG00000185745.10	IFIT1	517.712	1061.45	155.219	-2.77304	1.17597e-16	5.74636e-16	1354.81	768.092	136.055	157.557	172.046
ENSG00000214820.3	MPRIPP1	47.321	99.3573	12.6302	-2.94825	1.24239e-16	6.06324e-16	88.2356	110.479	8.74642	12.8994	16.2447
ENSG00000123374.11	CDK2	123.345	202.848	70.3427	-1.52643	1.3642e-16	6.64937e-16	196.576	209.121	62.1967	80.1607	68.6706
ENSG00000142279.13	WTIP	176.34	271.282	113.046	-1.25935	1.50773e-16	7.33971e-16	247.953	294.61	114.675	111.488	112.974
ENSG00000169093.16	ASMTL	80.9715	147.045	36.9226	-1.99123	1.51928e-16	7.39127e-16	136.263	157.827	31.0984	44.2266	35.4429
ENSG00000169093.16	PAR	80.9715	147.045	36.9226	-1.99123	1.51928e-16	7.39127e-16	136.263	157.827	31.0984	44.2266	35.4429
ENSG00000117399.14	CDC20	34.867	80.5475	4.41338	-4.21483	1.52856e-16	7.43409e-16	92.7033	68.3917	2.91547	7.3711	2.95357
ENSG00000135414.10	GDF11	115.245	192.822	63.527	-1.59274	1.59438e-16	7.74932e-16	190.991	194.653	62.1967	55.2833	73.101
ENSG00000118729.12	CASQ2	34.7675	84.1957	1.8154	-5.60032	1.63814e-16	7.95955e-16	96.054	72.3374	1.94365	2.76416	0.738394
ENSG00000111335.14	OAS2	204.778	451.302	40.4293	-3.48042	1.74812e-16	8.48858e-16	605.363	297.241	41.7884	35.9341	43.5652
ENSG00000125266.8	EFNB2	76.9515	143.35	32.686	-2.12653	1.79406e-16	8.70075e-16	163.068	123.631	31.0984	28.563	38.3965
ENSG00000138778.13	CENPE	56.5347	110.688	20.4323	-2.44961	1.87014e-16	9.06121e-16	116.158	105.218	19.4365	24.8775	16.9831
ENSG00000126787.13	DLGAP5	36.2619	88.6007	1.36946	-5.95048	1.99427e-16	9.6506e-16	98.2878	78.9135	0.971824	0.921388	2.21518
ENSG00000101134.12	DOK5	109.13	180.823	61.3349	-1.56359	2.51751e-16	1.21319e-15	185.407	176.24	60.2531	65.4185	58.3331
ENSG00000159884.12	CCDC107	211.729	321.48	138.561	-1.21338	2.51799e-16	1.21319e-15	341.773	301.187	118.563	153.872	143.248
ENSG00000134775.15	FHOD3	35.6401	78.5485	7.03443	-3.49819	2.541e-16	1.2239e-15	78.1835	78.9135	8.74642	6.44971	5.90715
ENSG00000112561.19	TFEB	56.0558	108.491	21.0992	-2.36304	2.57069e-16	1.23781e-15	103.872	113.109	22.352	20.2705	20.675
ENSG00000173320.12	STOX2	44.0696	91.1058	12.7121	-2.84116	3.14791e-16	1.51152e-15	84.8849	97.3267	13.6055	11.978	12.5527
ENSG00000142945.13	KIF2C	33.9057	81.8992	1.91002	-5.54937	3.19507e-16	1.53322e-15	84.8849	78.9135	3.8873	1.84278	0
ENSG00000231187.3	AL356056.2	35.1546	77.5934	6.86199	-3.49201	3.75437e-16	1.7966e-15	81.5342	73.6526	5.83095	7.3711	7.38394
ENSG00000178585.15	CTNNBIP1	102.473	171.392	56.526	-1.6011	3.86951e-16	1.85056e-15	173.121	169.664	59.2813	53.4405	56.8563
ENSG00000087253.13	LPCAT2	190.926	292.519	123.198	-1.25265	3.96506e-16	1.89508e-15	327.254	257.784	122.45	125.309	121.835
ENSG00000090097.22	PCBP4	268.343	400.06	180.532	-1.14079	3.975e-16	1.89925e-15	352.943	447.177	181.731	164.928	194.936
ENSG00000130304.17	SLC27A1	148.856	232.123	93.3456	-1.3139	5.07024e-16	2.41288e-15	244.603	219.643	91.3515	91.2174	97.468
ENSG00000157404.16	KIT	208.762	428.995	61.9404	-2.7997	5.57029e-16	2.64354e-15	493.673	364.317	70.9432	72.7896	42.0884
ENSG00000182621.18	PLCB1	247.186	354.747	175.479	-1.01701	5.99727e-16	2.84085e-15	359.644	349.85	188.534	162.164	175.738
ENSG00000112183.15	RBM24	160.839	246.987	103.407	-1.25632	7.80008e-16	3.67474e-15	240.135	253.838	111.76	95.8243	102.637
ENSG00000142694.6	EVA1B	258.469	383.494	175.119	-1.12342	8.14528e-16	3.83504e-15	339.54	427.448	160.351	179.671	185.337
ENSG00000130005.13	GAMT	149.262	231.773	94.2543	-1.29536	8.95313e-16	4.20773e-15	218.914	244.632	94.2669	93.9816	94.5144
ENSG00000135437.10	RDH5	52.5901	106.967	16.3388	-2.71131	9.3201e-16	4.37488e-15	128.444	85.4896	13.6055	18.4278	16.9831
ENSG00000178295.15	GEN1	152.063	241.319	92.5586	-1.39085	9.87783e-16	4.62688e-15	266.941	215.697	103.013	87.5318	87.1305
ENSG00000091622.16	PITPNM3	104.558	185.933	50.3078	-1.88676	1.00421e-15	4.7024e-15	157.484	214.382	44.7039	62.6544	43.5652
ENSG00000019485.13	PRDM11	123.32	200.416	71.9221	-1.48458	1.01428e-15	4.74667e-15	194.342	206.49	82.6051	68.1827	64.9786
ENSG00000210140.1	MT-TC	48.8041	107.489	9.68087	-3.44425	1.02441e-15	4.78974e-15	137.38	77.5983	8.74642	5.52833	14.7679
ENSG00000102385.13	DRP2	31.8208	72.6038	4.63214	-3.97156	1.11719e-15	5.21724e-15	63.6637	81.544	4.85912	4.60694	4.43036
ENSG00000157350.13	ST3GAL2	206.827	306.078	140.66	-1.11916	1.14036e-15	5.32387e-15	300.448	311.708	126.337	153.872	141.772
ENSG00000182636.8	NDN	185.516	298.213	110.385	-1.42545	1.14498e-15	5.3438e-15	314.968	281.458	84.5487	115.173	131.434
ENSG00000162545.6	CAMK2N1	143.036	224.8	88.5264	-1.33723	1.25384e-15	5.83783e-15	223.381	226.219	82.6051	84.7677	98.2064
ENSG00000139291.14	TMEM19	187.92	285.061	123.16	-1.21538	1.32586e-15	6.16575e-15	314.968	255.154	127.309	118.859	123.312
ENSG00000059378.13	PARP12	158.831	252.624	96.303	-1.40266	1.4568e-15	6.76449e-15	280.344	224.904	103.013	103.195	82.7001
ENSG00000137965.11	IFI44	105.3	197.034	44.1443	-2.16068	1.48954e-15	6.91237e-15	254.655	139.414	39.8448	46.0694	46.5188
ENSG00000188015.10	S100A3	69.3606	128.793	29.7386	-2.11947	1.70069e-15	7.88046e-15	141.847	115.74	34.9857	23.9561	30.2741
ENSG00000144802.11	NFKBIZ	214.976	318.536	145.936	-1.12612	1.88678e-15	8.7349e-15	308.266	328.806	133.14	165.85	138.818
ENSG00000163637.13	PRICKLE2	151.072	234.951	95.1528	-1.29899	2.02316e-15	9.34114e-15	242.369	227.534	85.5205	95.8243	104.114
ENSG00000259426.6	AC027237.3	57.0451	112.598	20.0097	-2.48428	2.10468e-15	9.70883e-15	109.457	115.74	12.6337	26.7202	20.675
ENSG00000106511.6	MEOX2	60.0688	113.976	24.1306	-2.22778	2.1427e-15	9.88129e-15	116.158	111.794	23.3238	20.2705	28.7974
ENSG00000069431.12	ABCC9	49.6457	98.1674	17.2979	-2.52057	2.19083e-15	1.00973e-14	101.639	94.6962	19.4365	18.4278	14.0295
ENSG00000134222.16	PSRC1	47.506	94.7175	16.0317	-2.55673	2.38908e-15	1.10044e-14	96.054	93.381	13.6055	17.5064	16.9831
ENSG00000110876.10	SELPLG	33.3062	73.2249	6.69367	-3.4604	2.94935e-15	1.35368e-14	71.482	74.9678	6.80277	7.3711	5.90715
ENSG00000133106.15	EPSTI1	44.5626	93.3293	12.0515	-2.97515	3.25242e-15	1.49013e-14	111.691	74.9678	14.5774	11.978	9.59912
ENSG00000136147.18	PHF11	186.081	275.181	126.681	-1.12369	3.46149e-15	1.58405e-14	278.11	272.252	132.168	128.994	118.881
ENSG00000119403.15	PHF19	167.974	253.354	111.054	-1.1942	3.53351e-15	1.61652e-14	264.707	242.001	109.816	117.016	106.329
ENSG00000066279.19	ASPM	60.9282	120.057	21.5093	-2.47768	3.56561e-15	1.63025e-14	121.743	118.37	28.1829	11.978	24.367
ENSG00000162384.14	CZIB	234.959	335.561	167.891	-1.0002	3.65193e-15	1.66922e-14	323.903	347.219	172.985	170.457	160.231
ENSG00000157456.8	CCNB2	34.7969	77.4316	6.37384	-3.6535	3.69185e-15	1.68697e-14	75.9497	78.9135	9.71824	6.44971	2.95357
ENSG00000272031.3	ANKRD34A	34.5192	75.2604	7.35837	-3.37652	4.25996e-15	1.94141e-14	78.1835	72.3374	9.71824	6.44971	5.90715
ENSG00000021762.20	OSBPL5	243.599	349.397	173.066	-1.00686	4.60729e-15	2.09724e-14	338.423	360.372	162.295	168.614	188.29
ENSG00000005469.12	CROT	80.1486	139.153	40.8121	-1.77197	4.97317e-15	2.26113e-14	136.263	142.044	42.7603	40.5411	39.1349
ENSG00000176826.15	FKBP9P1	98.918	166.403	53.9282	-1.61893	5.43568e-15	2.46707e-14	155.25	177.555	47.6194	58.0474	56.1179
ENSG00000135899.19	SP110	189.76	284.142	126.839	-1.1705	5.54432e-15	2.51491e-14	310.5	257.784	134.112	125.309	121.097
ENSG00000182667.14	NTM	36.5852	78.8825	8.38708	-3.23223	6.25374e-15	2.83256e-14	67.0144	90.7505	8.74642	8.29249	8.12233
ENSG00000165633.13	VSTM4	86.591	147.765	45.8082	-1.68763	6.53199e-15	2.95513e-14	142.964	152.566	43.7321	47.9122	45.7804
ENSG00000126803.9	HSPA2	58.4979	117.849	18.9305	-2.63649	7.83683e-15	3.53204e-14	131.795	103.903	10.6901	27.6416	18.4598
ENSG00000143127.13	ITGA10	45.9426	93.8981	13.9723	-2.7205	8.27995e-15	3.7285e-14	90.4694	97.3267	11.6619	11.0567	19.1982
ENSG00000162745.11	OLFML2B	77.7449	193.876	0.323941	-9.27778	8.4286e-15	3.79324e-14	186.523	201.229	0.971824	0	0
ENSG00000182379.10	NXPH4	201.316	294.638	139.101	-1.07789	9.17192e-15	4.11939e-14	295.98	293.295	128.281	139.13	149.894
ENSG00000183876.9	ARSI	32.5946	73.6581	5.21903	-3.82039	9.68878e-15	4.34649e-14	59.1961	88.1201	6.80277	3.68555	5.16876
ENSG00000100092.24	SH3BP1	42.8557	87.8439	12.8636	-2.76805	1.08368e-14	4.85305e-14	99.4047	76.2831	11.6619	12.8994	14.0295
ENSG00000233098.9	CCDC144NL-AS1	37.2611	78.846	9.53779	-3.04784	1.09503e-14	4.90249e-14	74.8328	82.8592	7.77459	11.978	8.86072
ENSG00000130813.18	SHFL	277.265	395.425	198.492	-1.00221	1.10478e-14	4.94329e-14	419.957	370.894	205.055	214.683	175.738
ENSG00000183873.18	SCN5A	29.9677	68.6843	4.15669	-4.08207	1.15795e-14	5.17819e-14	78.1835	59.1851	5.83095	3.68555	2.95357
ENSG00000139998.16	RAB15	57.1123	107.932	23.2323	-2.22003	1.23813e-14	5.53196e-14	102.755	113.109	21.3801	27.6416	20.675
ENSG00000196711.9	ALKAL1	33.0599	72.3063	6.89562	-3.38498	1.25787e-14	5.61691e-14	67.0144	77.5983	7.77459	5.52833	7.38394
[truncated: 1,204 more rows]
