# Supplementary material for: Nanchangmycin regulates FYN, PTK2, and MAPK1/3 to control the fibrotic activity of human hepatic stellate cells
Source: eLife. 2022 May 26;11:e74513. doi: 10.7554/eLife.74513 (PMC9135407; doi:10.7554/eLife.74513)
Supplement: Supplementary file 10. — This table contains the Enrichr pathway analysis results of the up- and down-regulated genes by NCMC in five databases. [file elife-74513-supp10.xlsx]

## Sheet: UP_Reactome
Term	Overlap	P-value	Adjusted P-value	Old P-value	Old Adjusted P-value	Odds Ratio	Combined Score	Genes
Unfolded Protein Response (UPR) Homo sapiens R-HSA-381119	25/86	2.40579e-07	0.000198126	0	0	3.93831	60.0207	CXCL8;GOSR2;CXXC1;HERPUD1;SERP1;DNAJB9;SEC63;HSPA5;NFYA;DIS3;DDX11;EDEM1;GFPT1;EIF2AK3;SYVN1;YIF1A;ERN1;DNAJC3;DDIT3;SRPRB;HYOU1;TPP1;KDELR3;ATF6;ATF3
Regulation of cholesterol biosynthesis by SREBP (SREBF) Homo sapiens R-HSA-1655829	19/55	3.44867e-07	0.000198126	0	0	5.06252	75.3308	SREBF1;IDI1;FDPS;SEC24A;HMGCS1;NFYA;SAR1B;INSIG2;INSIG1;ELOVL6;HMGCR;ACACA;SQLE;SCD;FASN;PMVK;MVD;DHCR7;PPARA
Asparagine N-linked glycosylation Homo sapiens R-HSA-446203	49/259	2.22745e-06	0.000853114	0	0	2.25249	29.3154	DPAGT1;ARF4;MIA3;GOLGA2;NANP;PGM3;NUDT14;DYNC2H1;COG6;COG5;COG3;ALG2;ALG3;COG1;MOGS;ANK2;ALG11;RENBP;DHDDS;MVD;KDELR3;SEC22B;GNE;NAPA;SAR1B;GOSR2;GOSR1;UAP1;AMDHD2;NEU1;SLC17A5;MAN1C1;MLEC;ST3GAL6;YKT6;CD55;NUS1;SEC16B;SEC24A;EDEM1;FUCA1;SEC16A;GBF1;GFPT1;SYVN1;SEC23IP;NAGK;GOLGB1;STT3A
Activation of gene expression by SREBF (SREBP) Homo sapiens R-HSA-2426168	15/42	3.66233e-06	0.00105201	0	0	5.32032	66.5966	IDI1;FDPS;SREBF1;HMGCS1;NFYA;ELOVL6;HMGCR;ACACA;SQLE;SCD;FASN;PMVK;MVD;DHCR7;PPARA
IRE1alpha activates chaperones Homo sapiens R-HSA-381070	17/55	8.01284e-06	0.00184135	0	0	4.28619	50.2962	HSPA5;DDX11;GOSR2;EDEM1;GFPT1;CXXC1;SYVN1;YIF1A;ERN1;DNAJC3;SERP1;DNAJB9;SRPRB;HYOU1;TPP1;KDELR3;SEC63
Synthesis of UDP-N-acetyl-glucosamine Homo sapiens R-HSA-446210	6/8	1.73599e-05	0.00332442	0	0	28.6329	313.855	NAGK;AMDHD2;GFPT1;PGM3;UAP1;RENBP
Cholesterol biosynthesis Homo sapiens R-HSA-191273	10/23	2.11559e-05	0.00347259	0	0	7.35282	79.1428	FDPS;IDI1;SQLE;ARV1;HMGCS1;PMVK;MVD;HMGCR;DHCR7;HSD17B7
XBP1(S) activates chaperone genes Homo sapiens R-HSA-381038	15/53	8.48598e-05	0.012188	0	0	3.77793	35.4162	DDX11;GOSR2;EDEM1;GFPT1;CXXC1;SYVN1;YIF1A;DNAJC3;SERP1;DNAJB9;SRPRB;HYOU1;TPP1;KDELR3;SEC63
Biosynthesis of the N-glycan precursor (dolichol lipid-linked oligosaccharide, LLO) and transfer to a nascent protein Homo sapiens R-HSA-446193	19/78	9.8095e-05	0.0125235	0	0	3.08506	28.4738	DPAGT1;NUS1;GFPT1;ALG2;ALG3;UAP1;ALG11;RENBP;DHDDS;NANP;NAGK;AMDHD2;NEU1;PGM3;SLC17A5;MVD;ST3GAL6;NUDT14;GNE
Post-translational protein modification Homo sapiens R-HSA-597592	75/521	0.000181786	0.0208872	0	0	1.62473	13.9933	POMT2;GALNT12;DPAGT1;MDC1;ARF4;PROS1;MIA3;GOLGA2;NANP;PGM3;NUDT14;NDC1;DYNC2H1;COG6;COG5;COG3;ALG2;ALG3;COG1;MOGS;ANK2;ALG11;RENBP;DHDDS;PIGA;B3GNT5;MVD;PIGL;KDELR3;SEC22B;GNE;PIGH;NAPA;L3MBTL2;SAR1B;GOSR2;GOSR1;UAP1;AAAS;WRN;AMDHD2;DPH2;NEU1;SLC17A5;MAN1C1;GCNT3;MLEC;ST3GAL6;DPH6;TP53BP1;DPH7;YKT6;CD55;RANBP2;SEC16B;NUS1;NOP58;SEC24A;GALNT3;EDEM1;FUCA1;SEC16A;GFPT1;GBF1;C1GALT1;SYVN1;DOHH;PHC3;S…
Intra-Golgi traffic Homo sapiens R-HSA-6811438	12/44	0.000618938	0.0639722	0	0	3.58452	26.4807	NAPA;GOLGA5;COG6;RAB36;COG5;GOSR2;GOSR1;COG3;MAN1C1;COG1;TRIP11;YKT6
Synthesis of substrates in N-glycan biosythesis Homo sapiens R-HSA-446219	15/63	0.000668117	0.0639722	0	0	2.9892	21.8542	NUS1;GFPT1;UAP1;RENBP;DHDDS;NANP;NAGK;AMDHD2;NEU1;PGM3;SLC17A5;MVD;ST3GAL6;NUDT14;GNE
Intra-Golgi and retrograde Golgi-to-ER traffic Homo sapiens R-HSA-6811442	31/179	0.000754722	0.0662773	0	0	2.00951	14.4467	NAPA;ARF4;TMF1;GOSR2;GOSR1;ARL1;KLC4;GOLGA4;GOLGA5;VPS53;GOLGA1;MAN1C1;BNIP1;YKT6;DYNC2H1;COG6;COG5;COG3;GBF1;COG1;KIF27;RAB36;KIF16B;ZW10;RAB18;NAA35;TRIP11;RAB3GAP2;KDELR3;VAMP4;SEC22B
PERK regulates gene expression Homo sapiens R-HSA-381042	9/28	0.000807556	0.0662773	0	0	4.5239	32.2169	CXCL8;HSPA5;NFYA;DIS3;DDIT3;EIF2AK3;ATF6;ATF3;HERPUD1
Retrograde transport at the Trans-Golgi-Network Homo sapiens R-HSA-6811440	12/49	0.00173334	0.132774	0	0	3.09927	19.7043	NAPA;GOLGA4;TMF1;COG6;COG5;VPS53;GOLGA1;COG3;ARL1;COG1;NAA35;VAMP4
Response to metal ions Homo sapiens R-HSA-5660526	5/11	0.00218892	0.147946	0	0	7.94764	48.6741	MT2A;MT1A;MT1F;MT1G;MT1X
Metallothioneins bind metals Homo sapiens R-HSA-5661231	5/11	0.00218892	0.147946	0	0	7.94764	48.6741	MT2A;MT1A;MT1F;MT1G;MT1X
COPI-mediated anterograde transport Homo sapiens R-HSA-6807878	16/78	0.00243592	0.155493	0	0	2.4679	14.8504	DYNC2H1;NAPA;ARF4;COG6;COG5;GOSR2;COG3;GOSR1;GBF1;COG1;ANK2;GOLGA2;GOLGB1;KDELR3;YKT6;CD55
ER to Golgi Anterograde Transport Homo sapiens R-HSA-199977	23/131	0.0028483	0.172247	0	0	2.03896	11.9504	DYNC2H1;NAPA;SEC16B;ARF4;SEC24A;COG6;COG5;SAR1B;SEC16A;GOSR2;COG3;GOSR1;GBF1;COG1;ANK2;MIA3;GOLGA2;SEC23IP;GOLGB1;KDELR3;SEC22B;YKT6;CD55
Metabolism of proteins Homo sapiens R-HSA-392499	129/1074	0.0030822	0.177072	0	0	1.32065	7.63617	DPAGT1;GALNT12;MDC1;PROS1;ZDHHC2;GOLGA2;PCMT1;FBXO6;NUDT14;SEC63;SLC30A7;DYNC2H1;SLC30A6;CSNK2A1;COG6;COG5;SLC30A5;DDX11;COG3;PAM16;ALG2;ALG3;COG1;MOGS;ANK2;ALG11;TUBA4A;DHDDS;ERN1;DDIT3;KDELR3;ATF6;ATF3;GNE;L3MBTL2;SAR1B;UAP1;CSF2RB;AAAS;AMDHD2;DPH2;GRPEL2;NEU1;LDHD;MLEC;ST3GAL6;DPH6;TP53BP1;DPH7;HSPA9;SEC16B;NUS1;ACE;HSPA5;ABCA3;EDEM1;FUCA1;SEC16A;GFPT1;EIF2AK3;PHC3;INHBE;TIMM10B;STAG1;GGCX;GOL…
Linoleic acid (LA) metabolism Homo sapiens R-HSA-2046105	4/8	0.0041698	0.228147	0	0	9.53319	52.2408	FADS2;ELOVL5;ACSL1;FADS1
alpha-linolenic (omega3) and linoleic (omega6) acid metabolism Homo sapiens R-HSA-2046104	5/13	0.00518627	0.259088	0	0	5.96007	31.3603	FADS2;ELOVL5;ACSL1;ACOX1;FADS1
alpha-linolenic acid (ALA) metabolism Homo sapiens R-HSA-2046106	5/13	0.00518627	0.259088	0	0	5.96007	31.3603	FADS2;ELOVL5;ACSL1;ACOX1;FADS1
Membrane Trafficking Homo sapiens R-HSA-199991	56/420	0.00607548	0.279665	0	0	1.47796	7.54274	ARF4;TFRC;MIA3;PIK3C2A;CLINT1;GOLGA2;GOLGA4;GOLGA5;FTH1;GOLGA1;DYNC2H1;COG6;COG5;MYH15;COG3;COG1;ANK2;PRKAB1;KIF27;RAB36;DNAJC6;KIF16B;ZW10;CHMP4C;NAA35;EXOC6;KDELR3;VAMP4;SEC22B;FTL;NAPA;RALA;TMF1;SAR1B;GOSR2;GOSR1;ARL1;KLC4;VPS53;MAN1C1;BNIP1;YKT6;CD55;SEC16B;SEC24A;SEC16A;GBF1;HIP1R;STAM;AP4B1;SEC23IP;NECAP1;GOLGB1;RAB18;TRIP11;RAB3GAP2
Iron uptake and transport Homo sapiens R-HSA-917937	10/43	0.00608497	0.279665	0	0	2.89336	14.7617	SLC46A1;ATP6V0B;TFRC;FTH1;SLC11A2;HMOX1;ATP6V0E2;MCOLN1;ATP6V1C1;FTL
Metabolism of vitamins and cofactors Homo sapiens R-HSA-196854	24/148	0.00661425	0.292299	0	0	1.85242	9.29641	ALDH1L1;SLC46A1;UBIAD1;PDXK;PANK3;TPK1;AKR1C1;QPRT;MOCOS;MTHFR;MTR;APOA4;PTGS2;LRP8;ACACA;CYP27B1;RDH11;FASN;NAMPT;MTHFD2L;CYP2R1;ACP5;SLC25A32;SLC19A2
Metal ion SLC transporters Homo sapiens R-HSA-425410	7/25	0.0071961	0.295297	0	0	3.71035	18.3077	SLC30A7;SLC30A6;SLC31A1;SLC41A2;SLC30A5;SLC11A2;SLC39A8
ATF4 activates genes Homo sapiens R-HSA-380994	7/25	0.0071961	0.295297	0	0	3.71035	18.3077	CXCL8;NFYA;DIS3;DDIT3;ATF6;ATF3;HERPUD1
rRNA modification in the nucleus Homo sapiens R-HSA-6790901	12/58	0.00754532	0.298951	0	0	2.49165	12.1763	WDR36;EMG1;NOP58;UTP6;GAR1;IMP4;NOC4L;THUMPD1;UTP18;WDR43;DCAF13;NOL6
Triglyceride Biosynthesis Homo sapiens R-HSA-75109	13/66	0.00848932	0.325141	0	0	2.34311	11.1742	AGPAT5;OLAH;DGAT2;GK;ACSL1;ELOVL5;ACOT11;LPCAT1;ELOVL6;ACACA;SCD;FASN;LPIN1
Transport to the Golgi and subsequent modification Homo sapiens R-HSA-948021	25/162	0.010565	0.37288	0	0	1.74617	7.94542	NAPA;ARF4;SAR1B;GOSR2;GOSR1;MIA3;GOLGA2;MAN1C1;YKT6;CD55;DYNC2H1;SEC16B;SEC24A;COG6;COG5;FUCA1;SEC16A;COG3;GBF1;COG1;ANK2;SEC23IP;GOLGB1;KDELR3;SEC22B
Metabolism of water-soluble vitamins and cofactors Homo sapiens R-HSA-196849	17/98	0.0106425	0.37288	0	0	2.00602	9.11314	ALDH1L1;SLC46A1;PDXK;PANK3;TPK1;QPRT;MOCOS;MTHFR;MTR;PTGS2;ACACA;FASN;NAMPT;MTHFD2L;ACP5;SLC25A32;SLC19A2
ATF6-alpha activates chaperone genes Homo sapiens R-HSA-381183	4/10	0.0107093	0.37288	0	0	6.35476	28.8292	HSPA5;NFYA;DDIT3;ATF6
Synthesis of Dolichyl-phosphate Homo sapiens R-HSA-446199	3/6	0.0137781	0.45405	0	0	9.5287	40.8274	NUS1;MVD;DHDDS
Metabolism of folate and pterines Homo sapiens R-HSA-196757	5/16	0.0138309	0.45405	0	0	4.33388	18.5527	ALDH1L1;SLC46A1;MTHFD2L;MTHFR;SLC25A32
Anchoring of the basal body to the plasma membrane Homo sapiens R-HSA-5620912	16/97	0.0203595	0.649809	0	0	1.88702	7.34843	CEP57;ODF2;RAB3IP;CCP110;KIF24;RPGRIP1L;TUBA4A;AHI1;TMEM67;CENPJ;AKAP9;CEP70;ALMS1;CEP83;CEP192;CEP76
ATF6-alpha activates chaperones Homo sapiens R-HSA-381033	4/12	0.0216371	0.671921	0	0	4.76554	18.268	HSPA5;NFYA;DDIT3;ATF6
Zinc efflux and compartmentalization by the SLC30 family Homo sapiens R-HSA-435368	3/7	0.022421	0.677941	0	0	7.14613	27.1393	SLC30A7;SLC30A6;SLC30A5
Fatty acid, triacylglycerol, and ketone body metabolism Homo sapiens R-HSA-535734	30/217	0.0238639	0.703066	0	0	1.53495	5.73363	AGPAT5;ALAS1;LPCAT1;HMGCR;ACACA;ACAT1;MCEE;OXCT1;MED10;MED31;FADS1;SREBF1;OLAH;DGAT2;NFYA;GK;HMGCS1;ACSL1;ELOVL5;ACOT11;G0S2;ELOVL6;ACOX1;SCD;FASN;TRIB3;PPARG;PLIN2;PPARA;LPIN1
tRNA modification in the nucleus and cytosol Homo sapiens R-HSA-6782315	8/39	0.0280681	0.783671	0	0	2.4617	8.79594	METTL1;PUS1;WDR4;TRMT1;CDKAL1;TRMT11;LAGE3;TRMT61A
Synthesis of PE Homo sapiens R-HSA-1483213	4/13	0.0289486	0.783671	0	0	4.2358	15.0042	PCYT2;CHKA;CEPT1;LPIN1
Golgi Associated Vesicle Biogenesis Homo sapiens R-HSA-432722	10/54	0.029328	0.783671	0	0	2.1687	7.65381	NAPA;NECAP1;TFRC;DNAJC6;FTH1;HIP1R;PIK3C2A;CLINT1;AP4B1;FTL
Mitochondrial protein import Homo sapiens R-HSA-1268020	10/54	0.029328	0.783671	0	0	2.1687	7.65381	HSPA9;TIMM10B;TIMM8A;TOMM40;PAM16;LDHD;GRPEL2;TIMM21;TOMM5;TOMM6
Assembly of the primary cilium Homo sapiens R-HSA-5617833	26/187	0.0315652	0.824283	0	0	1.54406	5.33581	CEP57;ARF4;IFT172;CCP110;HDAC6;ARL13B;TMEM67;CEP70;CEP192;CEP76;DYNC2H1;ODF2;RAB3IP;GBF1;KIF24;RPGRIP1L;TUBA4A;LZTFL1;AHI1;TTC8;CENPJ;AKAP9;ALMS1;CEP83;TRIP11;EXOC6
Synthesis of diphthamide-EEF2 Homo sapiens R-HSA-5358493	3/8	0.0333718	0.83357	0	0	5.71659	19.4366	DPH2;DPH6;DPH7
IKBKG deficiency causes anhidrotic ectodermal dysplasia with immunodeficiency (EDA-ID) (via TLR) Homo sapiens R-HSA-5603027	3/8	0.0333718	0.83357	0	0	5.71659	19.4366	RELA;NFKBIB;NFKB2
Cellular response to heat stress Homo sapiens R-HSA-3371556	15/96	0.037265	0.898877	0	0	1.76814	5.81665	NDC1;HSPA9;RANBP2;HSPA5;RPA2;AAAS;HSPA13;HDAC6;MTOR;DEDD2;BAG5;AKT1S1;ATM;HSPA1B;ATR
Synthesis of PIPs at the early endosome membrane Homo sapiens R-HSA-1660516	4/14	0.037551	0.898877	0	0	3.81201	12.5112	VAC14;PIKFYVE;PIK3C2A;PI4K2A
Fatty Acyl-CoA Biosynthesis Homo sapiens R-HSA-75105	8/42	0.0418743	0.981909	0	0	2.24411	7.12076	OLAH;ELOVL5;ACSL1;SCD;FASN;ACOT11;ELOVL6;ACACA
Energy dependent regulation of mTOR by LKB1-AMPK Homo sapiens R-HSA-380972	6/28	0.0446571	0.999995	0	0	2.60012	8.08309	RRAGC;RRAGD;TSC1;PRKAB1;LAMTOR3;MTOR
mTORC1-mediated signalling Homo sapiens R-HSA-166208	5/22	0.0518298	0.999995	0	0	2.80334	8.29731	RRAGC;RRAGD;AKT1S1;LAMTOR3;MTOR
Pink/Parkin Mediated Mitophagy Homo sapiens R-HSA-5205685	5/22	0.0518298	0.999995	0	0	2.80334	8.29731	MAP1LC3B;TOMM40;SQSTM1;TOMM5;TOMM6
Mitophagy Homo sapiens R-HSA-5205647	5/22	0.0518298	0.999995	0	0	2.80334	8.29731	MAP1LC3B;TOMM40;SQSTM1;TOMM5;TOMM6
Synthesis of pyrophosphates in the cytosol Homo sapiens R-HSA-1855167	3/10	0.0619616	0.999995	0	0	4.08283	11.3553	IPPK;PPIP5K2;IP6K3
Synthesis of PIPs at the late endosome membrane Homo sapiens R-HSA-1660517	3/10	0.0619616	0.999995	0	0	4.08283	11.3553	VAC14;PIKFYVE;PIK3C2A
trans-Golgi Network Vesicle Budding Homo sapiens R-HSA-199992	11/70	0.0655891	0.999995	0	0	1.77853	4.84533	NAPA;NECAP1;TFRC;DNAJC6;FTH1;GBF1;HIP1R;PIK3C2A;CLINT1;AP4B1;FTL
Clathrin derived vesicle budding Homo sapiens R-HSA-421837	11/70	0.0655891	0.999995	0	0	1.77853	4.84533	NAPA;NECAP1;TFRC;DNAJC6;FTH1;GBF1;HIP1R;PIK3C2A;CLINT1;AP4B1;FTL
Vesicle-mediated transport Homo sapiens R-HSA-5653656	57/492	0.068326	0.999995	0	0	1.25445	3.36627	ARF4;TFRC;MIA3;PIK3C2A;CLINT1;GOLGA2;GOLGA4;GOLGA5;FTH1;GOLGA1;DYNC2H1;COG6;COG5;MYH15;COG3;COG1;ANK2;PRKAB1;KIF27;RAB36;DNAJC6;KIF16B;ZW10;CHMP4C;NAA35;EXOC6;KDELR3;VAMP4;SEC22B;FTL;NAPA;RALA;TMF1;SAR1B;GOSR2;GOSR1;ARL1;KLC4;VPS53;MAN1C1;BNIP1;YKT6;CD55;SEC16B;SEC24A;SEC16A;GBF1;HIP1R;STAM;AP4B1;SEC23IP;NECAP1;GOLGB1;RAB18;TRIP11;RAB3GAP2;HYOU1
Zinc transporters Homo sapiens R-HSA-435354	4/17	0.0711554	0.999995	0	0	2.93183	7.7485	SLC30A7;SLC30A6;SLC30A5;SLC39A8
N-glycan trimming in the ER and Calnexin/Calreticulin cycle Homo sapiens R-HSA-532668	4/17	0.0711554	0.999995	0	0	2.93183	7.7485	EDEM1;SYVN1;MLEC;MOGS
Diseases associated with the TLR signaling cascade Homo sapiens R-HSA-5602358	5/24	0.0715434	0.999995	0	0	2.50798	6.61466	LY96;TLR6;RELA;NFKB2;NFKBIB
Diseases of Immune System Homo sapiens R-HSA-5260271	5/24	0.0715434	0.999995	0	0	2.50798	6.61466	LY96;TLR6;RELA;NFKB2;NFKBIB
mTOR signalling Homo sapiens R-HSA-165159	7/39	0.0722103	0.999995	0	0	2.08546	5.48094	RRAGC;RRAGD;AKT1S1;TSC1;PRKAB1;LAMTOR3;MTOR
Presynaptic phase of homologous DNA pairing and strand exchange Homo sapiens R-HSA-5693616	7/39	0.0722103	0.999995	0	0	2.08546	5.48094	WRN;RAD50;TOP3A;RPA2;ATM;BRCA2;ATR
Nucleotide-binding domain, leucine rich repeat containing receptor (NLR) signaling pathways Homo sapiens R-HSA-168643	8/47	0.073612	0.999995	0	0	1.95587	5.10275	P2RX7;CYLD;IRAK2;BCL2;NOD2;NLRP1;MAPK13;BIRC3
Catabolism of glucuronate to xylulose-5-phosphate Homo sapiens R-HSA-5661270	2/5	0.074412	0.999995	0	0	6.34912	16.4959	AKR1A1;XYLB
Leukotriene receptors Homo sapiens R-HSA-391906	2/5	0.074412	0.999995	0	0	6.34912	16.4959	LTB4R2;LTB4R
Regulation of HSF1-mediated heat shock response Homo sapiens R-HSA-3371453	12/80	0.0749331	0.999995	0	0	1.68347	4.36215	NDC1;HSPA9;RANBP2;BAG5;HSPA5;RPA2;ATM;AAAS;HSPA13;HSPA1B;DEDD2;ATR
Processive synthesis on the C-strand of the telomere Homo sapiens R-HSA-174414	3/11	0.0793554	0.999995	0	0	3.57227	9.0515	FEN1;LIG1;RPA2
PKB-mediated events Homo sapiens R-HSA-109703	7/40	0.0806849	0.999995	0	0	2.02215	5.09016	RRAGC;RRAGD;AKT1S1;TSC1;PRKAB1;LAMTOR3;MTOR
Synthesis of PIPs at the Golgi membrane Homo sapiens R-HSA-1660514	4/18	0.0848771	0.999995	0	0	2.72226	6.7146	VAC14;PIKFYVE;PIK3C2A;PI4K2A
Metabolism of lipids and lipoproteins Homo sapiens R-HSA-556833	73/659	0.0941434	0.999995	0	0	1.19274	2.81838	DMGDH;ALAS1;LPCAT1;PIK3C2A;LIPE;FADS2;MCEE;ARV1;MED10;OSBP;CYP1B1;GGT1;FADS1;SREBF1;PHYH;DGAT2;PCYT2;HMGCS1;ELOVL5;ACSL1;ACOT11;ELOVL6;APOA4;CH25H;ACOX1;PPARG;PLIN2;TRIB3;MVD;PPARA;PI4K2A;AGPAT5;IDI1;VAC14;ASAH2;SAR1B;ABHD3;INSIG2;INSIG1;PLD6;HMGCR;PTGS2;HSD17B7;LMF2;ACACA;ACAT1;OXCT1;MED31;PMVK;NEU1;INPP5J;CEPT1;KDSR;OLAH;FDPS;SEC24A;CHKA;GK;NFYA;PNPLA8;AKR1C1;IDH1;G0S2;SQLE;FABP3;PIKFYVE;NCEH1;…
Resolution of D-loop Structures through Synthesis-Dependent Strand Annealing (SDSA) Homo sapiens R-HSA-5693554	5/26	0.0947963	0.999995	0	0	2.26887	5.34551	WRN;RAD50;TOP3A;ATM;BRCA2
TAK1 activates NFkB by phosphorylation and activation of IKKs complex Homo sapiens R-HSA-445989	5/26	0.0947963	0.999995	0	0	2.26887	5.34551	IRAK2;NOD2;RELA;NFKB2;NFKBIB
Homologous DNA Pairing and Strand Exchange Homo sapiens R-HSA-5693579	7/42	0.0992752	0.999995	0	0	1.90639	4.40348	WRN;RAD50;TOP3A;RPA2;ATM;BRCA2;ATR
Vitamins Homo sapiens R-HSA-211916	2/6	0.104729	0.999995	0	0	4.76158	10.7439	CYP27B1;CYP2R1
Sensing of DNA Double Strand Breaks Homo sapiens R-HSA-5693548	2/6	0.104729	0.999995	0	0	4.76158	10.7439	RAD50;ATM
Assembly of the ORC complex at the origin of replication Homo sapiens R-HSA-68616	2/6	0.104729	0.999995	0	0	4.76158	10.7439	ORC6;ORC1
COPII (Coat Protein 2) Mediated Vesicle Transport Homo sapiens R-HSA-204005	10/68	0.108569	0.999995	0	0	1.64395	3.65017	GOLGA2;NAPA;SEC16B;SEC23IP;SEC24A;SAR1B;GOSR2;SEC16A;SEC22B;YKT6
Synthesis of PC Homo sapiens R-HSA-1483191	4/20	0.115794	0.999995	0	0	2.38172	5.13484	CHKA;ABHD3;CEPT1;LPIN1
PPARA activates gene expression Homo sapiens R-HSA-1989781	15/113	0.116425	0.999995	0	0	1.46004	3.13983	SREBF1;ALAS1;HMGCS1;NFYA;ACSL1;G0S2;HMGCR;ACOX1;MED10;MED31;TRIB3;PPARG;PLIN2;PPARA;FADS1
Loss of Nlp from mitotic centrosomes Homo sapiens R-HSA-380259	10/69	0.116763	0.999995	0	0	1.61599	3.47052	CEP57;ODF2;CENPJ;AKAP9;CEP70;ALMS1;CCP110;CEP192;CEP76;TUBA4A
Loss of proteins required for interphase microtubule organization?from the centrosome Homo sapiens R-HSA-380284	10/69	0.116763	0.999995	0	0	1.61599	3.47052	CEP57;ODF2;CENPJ;AKAP9;CEP70;ALMS1;CCP110;CEP192;CEP76;TUBA4A
Centrosome maturation Homo sapiens R-HSA-380287	11/79	0.12756	0.999995	0	0	1.54237	3.17599	CEP57;ODF2;CENPJ;AKAP9;CEP70;ALMS1;TUBGCP5;CCP110;CEP192;CEP76;TUBA4A
Recruitment of mitotic centrosome proteins and complexes Homo sapiens R-HSA-380270	11/79	0.12756	0.999995	0	0	1.54237	3.17599	CEP57;ODF2;CENPJ;AKAP9;CEP70;ALMS1;TUBGCP5;CCP110;CEP192;CEP76;TUBA4A
CD209 (DC-SIGN) signaling Homo sapiens R-HSA-5621575	4/21	0.132846	0.999995	0	0	2.24149	4.5246	RPS6KA5;ICAM2;ICAM3;RELA
VxPx cargo-targeting to cilium Homo sapiens R-HSA-5620916	4/21	0.132846	0.999995	0	0	2.24149	4.5246	ARF4;GBF1;RAB3IP;EXOC6
HDR through Single Strand Annealing (SSA) Homo sapiens R-HSA-5685938	6/37	0.134533	0.999995	0	0	1.84432	3.69961	WRN;RAD50;TOP3A;RPA2;ATM;ATR
Surfactant metabolism Homo sapiens R-HSA-5683826	5/29	0.135868	0.999995	0	0	1.98493	3.96206	ADORA2B;ABCA3;CSF2RB;ADRA2C;ZDHHC2
Transferrin endocytosis and recycling Homo sapiens R-HSA-917977	5/29	0.135868	0.999995	0	0	1.98493	3.96206	ATP6V0B;TFRC;ATP6V0E2;MCOLN1;ATP6V1C1
Regulation of lipid metabolism by Peroxisome proliferator-activated receptor alpha (PPARalpha) Homo sapiens R-HSA-400206	15/116	0.136583	0.999995	0	0	1.41644	2.81988	SREBF1;ALAS1;HMGCS1;NFYA;ACSL1;G0S2;HMGCR;ACOX1;MED10;MED31;TRIB3;PPARG;PLIN2;PPARA;FADS1
Regulation of TP53 Activity through Phosphorylation Homo sapiens R-HSA-6804756	12/89	0.136914	0.999995	0	0	1.48596	2.95469	WRN;RAD50;CSNK2A1;TAF13;TOP3A;TAF9;RPA2;TAF4B;ATM;TAF5;PRKAB1;ATR
POLB-Dependent Long Patch Base Excision Repair Homo sapiens R-HSA-110362	2/7	0.137652	0.999995	0	0	3.80905	7.55345	FEN1;LIG1
Vitamin D (calciferol) metabolism Homo sapiens R-HSA-196791	2/7	0.137652	0.999995	0	0	3.80905	7.55345	CYP27B1;CYP2R1
Signaling by NOTCH1 t(7;9)(NOTCH1:M1580 K2555) Translocation Mutant Homo sapiens R-HSA-2660825	2/7	0.137652	0.999995	0	0	3.80905	7.55345	JAG2;ADAM17
Constitutive Signaling by NOTCH1 t(7;9)(NOTCH1:M1580 K2555) Translocation Mutant Homo sapiens R-HSA-2660826	2/7	0.137652	0.999995	0	0	3.80905	7.55345	JAG2;ADAM17
PTK6 promotes HIF1A stabilization Homo sapiens R-HSA-8857538	2/7	0.137652	0.999995	0	0	3.80905	7.55345	GPNMB;LRRK2
IkBA variant leads to EDA-ID Homo sapiens R-HSA-5603029	2/7	0.137652	0.999995	0	0	3.80905	7.55345	RELA;NFKB2
Apoptotic factor-mediated response Homo sapiens R-HSA-111471	2/7	0.137652	0.999995	0	0	3.80905	7.55345	XIAP;CYCS
Interleukin-1 processing Homo sapiens R-HSA-448706	2/7	0.137652	0.999995	0	0	3.80905	7.55345	RELA;NFKB2
CS/DS degradation Homo sapiens R-HSA-2024101	3/14	0.141835	0.999995	0	0	2.59759	5.07332	BCAN;HYAL1;HYAL3
Mismatch repair (MMR) directed by MSH2:MSH3 (MutSbeta) Homo sapiens R-HSA-5358606	3/14	0.141835	0.999995	0	0	2.59759	5.07332	LIG1;RPA2;MLH1
Mismatch repair (MMR) directed by MSH2:MSH6 (MutSalpha) Homo sapiens R-HSA-5358565	3/14	0.141835	0.999995	0	0	2.59759	5.07332	LIG1;RPA2;MLH1
Receptor-ligand binding initiates the second proteolytic cleavage of Notch receptor Homo sapiens R-HSA-156988	3/14	0.141835	0.999995	0	0	2.59759	5.07332	JAG2;ADAM17;NOTCH4
Regulation of necroptotic cell death Homo sapiens R-HSA-5675482	3/14	0.141835	0.999995	0	0	2.59759	5.07332	XIAP;TNFRSF10A;BIRC3
Nicotinate metabolism Homo sapiens R-HSA-196807	3/14	0.141835	0.999995	0	0	2.59759	5.07332	QPRT;NAMPT;PTGS2
AURKA Activation by TPX2 Homo sapiens R-HSA-8854518	10/72	0.143331	0.999995	0	0	1.53754	2.98683	CEP57;ODF2;CENPJ;AKAP9;CEP70;ALMS1;CCP110;CEP192;CEP76;TUBA4A
Tight junction interactions Homo sapiens R-HSA-420029	5/30	0.151059	0.999995	0	0	1.90543	3.60143	PARD6A;CLDN3;CLDN15;CLDN12;CLDN1
Gamma carboxylation, hypusine formation and arylsulfatase activation Homo sapiens R-HSA-163841	6/39	0.16143	0.999995	0	0	1.73236	3.15926	GGCX;PROS1;DPH2;DPH6;DPH7;DOHH
Mismatch Repair Homo sapiens R-HSA-5358508	3/15	0.165429	0.999995	0	0	2.38099	4.2839	LIG1;RPA2;MLH1
Processive synthesis on the lagging strand Homo sapiens R-HSA-69183	3/15	0.165429	0.999995	0	0	2.38099	4.2839	FEN1;LIG1;RPA2
Constitutive Signaling by NOTCH1 HD Domain Mutants Homo sapiens R-HSA-2691232	3/15	0.165429	0.999995	0	0	2.38099	4.2839	JAG2;ADAM17;MIB2
Signaling by NOTCH1 HD Domain Mutants in Cancer Homo sapiens R-HSA-2691230	3/15	0.165429	0.999995	0	0	2.38099	4.2839	JAG2;ADAM17;MIB2
NOD1/2 Signaling Pathway Homo sapiens R-HSA-168638	5/31	0.166921	0.999995	0	0	1.83204	3.27979	CYLD;IRAK2;NOD2;MAPK13;BIRC3
BH3-only proteins associate with and inactivate anti-apoptotic BCL-2 members Homo sapiens R-HSA-111453	2/8	0.172412	0.999995	0	0	3.17404	5.57953	BCL2L11;BCL2
ChREBP activates metabolic gene expression Homo sapiens R-HSA-163765	2/8	0.172412	0.999995	0	0	3.17404	5.57953	FASN;ACACA
Nicotinamide salvaging Homo sapiens R-HSA-197264	2/8	0.172412	0.999995	0	0	3.17404	5.57953	NAMPT;PTGS2
tRNA modification in the mitochondrion Homo sapiens R-HSA-6787450	2/8	0.172412	0.999995	0	0	3.17404	5.57953	PUS1;MTO1
Ketone body metabolism Homo sapiens R-HSA-74182	2/8	0.172412	0.999995	0	0	3.17404	5.57953	OXCT1;ACAT1
Transcriptional activation of mitochondrial biogenesis Homo sapiens R-HSA-2151201	6/40	0.17568	0.999995	0	0	1.68131	2.92396	ALAS1;CYCS;TFB2M;POLRMT;PPRC1;PPARA
Mitochondrial biogenesis Homo sapiens R-HSA-1592230	7/49	0.180405	0.999995	0	0	1.58804	2.71959	ALAS1;CYCS;TFB2M;PPRC1;POLRMT;PPARA;PRKAB1
Resolution of D-loop Structures through Holliday Junction Intermediates Homo sapiens R-HSA-5693568	5/32	0.183403	0.999995	0	0	1.76409	2.99202	WRN;RAD50;TOP3A;ATM;BRCA2
Macroautophagy Homo sapiens R-HSA-1632852	9/67	0.18343	0.999995	0	0	1.47877	2.50788	MAP1LC3B;RRAGC;ATG101;RRAGD;CHMP4C;TSC1;PRKAB1;LAMTOR3;MTOR
Transcription of the HIV genome Homo sapiens R-HSA-167172	9/67	0.18343	0.999995	0	0	1.47877	2.50788	CCNT1;RNMT;TAF13;TAF9;TAF4B;TAF5;GTF2F1;SUPT5H;NELFE
Insulin processing Homo sapiens R-HSA-264876	4/24	0.189349	0.999995	0	0	1.90495	3.17015	SLC30A7;SLC30A6;SLC30A5;EXOC6
Synthesis of glycosylphosphatidylinositol (GPI) Homo sapiens R-HSA-162710	3/16	0.190066	0.999995	0	0	2.19772	3.64905	PIGA;PIGL;PIGH
Regulated Necrosis Homo sapiens R-HSA-5218859	3/16	0.190066	0.999995	0	0	2.19772	3.64905	XIAP;TNFRSF10A;BIRC3
RIPK1-mediated regulated necrosis Homo sapiens R-HSA-5213460	3/16	0.190066	0.999995	0	0	2.19772	3.64905	XIAP;TNFRSF10A;BIRC3
Organelle biogenesis and maintenance Homo sapiens R-HSA-1852241	36/326	0.19402	0.999995	0	0	1.1847	1.94266	CEP57;ARF4;ALAS1;IFT172;CCP110;HDAC6;MRPL55;MRPL2;ARL13B;TMEM67;CEP70;CEP192;CEP76;DYNC2H1;ODF2;RAB3IP;GBF1;KIF24;TFB2M;RPGRIP1L;PPRC1;POLRMT;PRKAB1;LZTFL1;TUBA4A;AHI1;TTC8;CENPJ;AKAP9;ALMS1;CEP83;TRIP11;CYCS;EXOC6;AURKAIP1;PPARA
Sialic acid metabolism Homo sapiens R-HSA-4085001	5/33	0.20045	0.999995	0	0	1.70099	2.73382	NANP;NEU1;SLC17A5;ST3GAL6;GNE
Cargo concentration in the ER Homo sapiens R-HSA-5694530	5/33	0.20045	0.999995	0	0	1.70099	2.73382	SEC24A;SAR1B;GOSR2;MIA3;SEC22B
Resolution of D-Loop Structures Homo sapiens R-HSA-5693537	5/33	0.20045	0.999995	0	0	1.70099	2.73382	WRN;RAD50;TOP3A;ATM;BRCA2
Regulation of PLK1 Activity at G2/M Transition Homo sapiens R-HSA-2565942	11/87	0.202366	0.999995	0	0	1.3794	2.20384	CEP57;BORA;ODF2;CENPJ;AKAP9;CEP70;ALMS1;CCP110;CEP192;CEP76;TUBA4A
Metabolism of fat-soluble vitamins Homo sapiens R-HSA-6806667	7/51	0.20757	0.999995	0	0	1.51569	2.38309	CYP27B1;UBIAD1;RDH11;AKR1C1;CYP2R1;APOA4;LRP8
Cargo trafficking to the periciliary membrane Homo sapiens R-HSA-5620920	7/51	0.20757	0.999995	0	0	1.51569	2.38309	ARF4;TTC8;ARL13B;GBF1;RAB3IP;EXOC6;LZTFL1
Organic cation transport Homo sapiens R-HSA-549127	2/9	0.208363	0.999995	0	0	2.72045	4.26696	SLC22A5;SLC22A15
Small interfering RNA (siRNA) biogenesis Homo sapiens R-HSA-426486	2/9	0.208363	0.999995	0	0	2.72045	4.26696	AGO3;TSN
Inactivation of Cdc42 and Rac Homo sapiens R-HSA-428543	2/9	0.208363	0.999995	0	0	2.72045	4.26696	ARHGAP39;SRGAP3
Sulfur amino acid metabolism Homo sapiens R-HSA-1614635	4/25	0.209656	0.999995	0	0	1.81414	2.83421	GOT1;CTH;MTR;CNDP2
Chylomicron-mediated lipid transport Homo sapiens R-HSA-174800	3/17	0.215547	0.999995	0	0	2.04062	3.13149	SAR1B;APOA4;P4HB
Inflammasomes Homo sapiens R-HSA-622312	3/17	0.215547	0.999995	0	0	2.04062	3.13149	P2RX7;BCL2;NLRP1
Metabolism of porphyrins Homo sapiens R-HSA-189445	3/17	0.215547	0.999995	0	0	2.04062	3.13149	ALAS1;HMOX1;PPOX
PI3K Cascade Homo sapiens R-HSA-109704	10/79	0.215897	0.999995	0	0	1.38102	2.11705	RRAGC;RRAGD;AKT1S1;IRS2;TSC1;TRIB3;FGF2;PRKAB1;LAMTOR3;MTOR
Generic Transcription Pathway Homo sapiens R-HSA-212436	84/812	0.219716	0.999995	0	0	1.10244	1.67065	ZNF331;ZNF573;MDC1;ZNF770;CCNT1;CHM;ZNF529;MED10;ZNF605;ZNF568;ZNF566;ZNF202;ZNF565;ZFP37;NELFE;PRMT5;ZNF560;CNOT6L;CSNK2A1;TOP3A;ZFP69B;ZNF10;TSC1;GTF2F1;PRKAB1;AR;ZNF717;RRAGC;RRAGD;PPARG;ZNF557;PPARA;ZNF432;ZNF398;ZNF550;ZNF274;ZNF791;ZNF471;NOTCH4;TAF9;WRN;PRDX5;ZNF749;MED31;ZNF347;E2F5;ZNF664;ZNF587;ZNF785;E2F7;ZNF582;CDKN2B;ZNF460;ZNF141;ZNF140;TAF13;RPA2;TNFRSF10A;CNOT10;SUPT5H;MLH1;ESR1;M…
TP53 Regulates Transcription of DNA Repair Genes Homo sapiens R-HSA-6796648	8/61	0.220605	0.999995	0	0	1.43811	2.17353	MDC1;CCNT1;ATM;GTF2F1;MLH1;SUPT5H;NELFE;ATR
COPI-dependent Golgi-to-ER retrograde traffic Homo sapiens R-HSA-6811434	10/81	0.238965	0.999995	0	0	1.34197	1.92095	NAPA;ARF4;KLC4;KIF16B;ZW10;GBF1;BNIP1;KDELR3;SEC22B;KIF27
Gamma-carboxylation of protein precursors Homo sapiens R-HSA-159740	2/10	0.244963	0.999995	0	0	2.38026	3.34819	GGCX;PROS1
Establishment of Sister Chromatid Cohesion Homo sapiens R-HSA-2468052	2/10	0.244963	0.999995	0	0	2.38026	3.34819	STAG1;ESCO1
ER Quality Control Compartment (ERQC) Homo sapiens R-HSA-901032	2/10	0.244963	0.999995	0	0	2.38026	3.34819	EDEM1;SYVN1
HDR through MMEJ (alt-NHEJ) Homo sapiens R-HSA-5685939	2/10	0.244963	0.999995	0	0	2.38026	3.34819	FEN1;RAD50
Removal of the Flap Intermediate from the C-strand Homo sapiens R-HSA-174437	2/10	0.244963	0.999995	0	0	2.38026	3.34819	FEN1;RPA2
E2F-enabled inhibition of pre-replication complex formation Homo sapiens R-HSA-113507	2/10	0.244963	0.999995	0	0	2.38026	3.34819	ORC6;ORC1
Regulated proteolysis of p75NTR Homo sapiens R-HSA-193692	2/10	0.244963	0.999995	0	0	2.38026	3.34819	ADAM17;RELA
FGFR2b ligand binding and activation Homo sapiens R-HSA-190377	2/10	0.244963	0.999995	0	0	2.38026	3.34819	FGFBP3;FGF2
Adenylate cyclase activating pathway Homo sapiens R-HSA-170660	2/10	0.244963	0.999995	0	0	2.38026	3.34819	GNAL;ADCY7
Urea cycle Homo sapiens R-HSA-70635	2/10	0.244963	0.999995	0	0	2.38026	3.34819	ARG2;ASS1
Golgi-to-ER retrograde transport Homo sapiens R-HSA-8856688	13/110	0.245387	0.999995	0	0	1.27713	1.79427	DYNC2H1;NAPA;ARF4;GBF1;KIF27;KLC4;KIF16B;ZW10;BNIP1;RAB18;RAB3GAP2;KDELR3;SEC22B
RNA Polymerase II Pre-transcription Events Homo sapiens R-HSA-674695	8/64	0.261111	0.999995	0	0	1.36084	1.82734	CCNT1;TAF13;TAF9;TAF4B;TAF5;GTF2F1;SUPT5H;NELFE
Regulation of TP53 Activity through Methylation Homo sapiens R-HSA-6804760	3/19	0.268288	0.999995	0	0	1.78535	2.34897	PRMT5;JMY;ATM
PCNA-Dependent Long Patch Base Excision Repair Homo sapiens R-HSA-5651801	3/19	0.268288	0.999995	0	0	1.78535	2.34897	FEN1;LIG1;RPA2
tRNA processing Homo sapiens R-HSA-72306	12/103	0.272861	0.999995	0	0	1.25638	1.63177	NDC1;RANBP2;METTL1;PUS1;WDR4;CDKAL1;TRMT1;TRMT11;AAAS;MTO1;LAGE3;TRMT61A
Gamma-carboxylation, transport, and amino-terminal cleavage of proteins Homo sapiens R-HSA-159854	2/11	0.281765	0.999995	0	0	2.11567	2.67989	GGCX;PROS1
CDC6 association with the ORC:origin complex Homo sapiens R-HSA-68689	2/11	0.281765	0.999995	0	0	2.11567	2.67989	ORC6;ORC1
Signaling by NOTCH4 Homo sapiens R-HSA-1980150	2/11	0.281765	0.999995	0	0	2.11567	2.67989	JAG2;NOTCH4
MyD88 deficiency (TLR2/4) Homo sapiens R-HSA-5602498	2/11	0.281765	0.999995	0	0	2.11567	2.67989	LY96;TLR6
IRAK4 deficiency (TLR2/4) Homo sapiens R-HSA-5603041	2/11	0.281765	0.999995	0	0	2.11567	2.67989	LY96;TLR6
Synthesis of IP2, IP, and Ins in the cytosol Homo sapiens R-HSA-1855183	2/11	0.281765	0.999995	0	0	2.11567	2.67989	SYNJ1;INPP5J
Heme biosynthesis Homo sapiens R-HSA-189451	2/11	0.281765	0.999995	0	0	2.11567	2.67989	ALAS1;PPOX
Lagging Strand Synthesis Homo sapiens R-HSA-69186	3/20	0.295199	0.999995	0	0	1.68023	2.05007	FEN1;LIG1;RPA2
HSF1 activation Homo sapiens R-HSA-3371511	4/29	0.295701	0.999995	0	0	1.52354	1.85629	RPA2;HDAC6;HSPA1B;DEDD2
Hexose transport Homo sapiens R-HSA-189200	6/48	0.304071	0.999995	0	0	1.36046	1.61962	RANBP2;NDC1;GCKR;AAAS;SLC5A3;FGF21
Death Receptor Signalling Homo sapiens R-HSA-73887	6/48	0.304071	0.999995	0	0	1.36046	1.61962	CYLD;ADAM17;XIAP;TNFRSF10A;NSMAF;BIRC3
Cellular responses to stress Homo sapiens R-HSA-2262752	38/367	0.313912	0.999995	0	0	1.10104	1.27572	CXCL8;AAAS;HSPA13;ANAPC10;RELA;HDAC6;DEDD2;PRDX5;MAP1LC3B;BAG5;ATG101;EP400;ATP7A;NDC1;RANBP2;HSPA9;KDM6B;CDKN2B;HSPA5;RPA2;TSC1;PRKAB1;PHC3;MTOR;RAD50;RRAGC;AGO3;RRAGD;AKT1S1;CHMP4C;POT1;CYCS;ATM;TNIK;P4HB;LAMTOR3;HSPA1B;ATR
Regulation of Glucokinase by Glucokinase Regulatory Protein Homo sapiens R-HSA-170822	4/30	0.317954	0.999995	0	0	1.46486	1.67851	RANBP2;NDC1;GCKR;AAAS
Hyaluronan uptake and degradation Homo sapiens R-HSA-2160916	2/12	0.318399	0.999995	0	0	1.904	2.17903	HYAL1;HYAL3
Vitamin B5 (pantothenate) metabolism Homo sapiens R-HSA-199220	2/12	0.318399	0.999995	0	0	1.904	2.17903	PANK3;FASN
Pyrimidine catabolism Homo sapiens R-HSA-73621	2/12	0.318399	0.999995	0	0	1.904	2.17903	NT5M;UPP1
TP53 regulates transcription of additional cell cycle genes whose exact role in the p53 pathway remain uncertain Homo sapiens R-HSA-6804115	3/21	0.322257	0.999995	0	0	1.5868	1.7969	CNOT6L;CENPJ;CNOT10
RIP-mediated NFkB activation via ZBP1 Homo sapiens R-HSA-1810476	3/21	0.322257	0.999995	0	0	1.5868	1.7969	RELA;NFKB2;NFKBIB
Synthesis of very long-chain fatty acyl-CoAs Homo sapiens R-HSA-75876	3/21	0.322257	0.999995	0	0	1.5868	1.7969	ELOVL5;ACSL1;ELOVL6
Pausing and recovery of Tat-mediated HIV elongation Homo sapiens R-HSA-167238	4/31	0.340329	0.999995	0	0	1.41053	1.52033	CCNT1;GTF2F1;SUPT5H;NELFE
Tat-mediated HIV elongation arrest and recovery Homo sapiens R-HSA-167243	4/31	0.340329	0.999995	0	0	1.41053	1.52033	CCNT1;GTF2F1;SUPT5H;NELFE
Resolution of AP sites via the multiple-nucleotide patch replacement pathway Homo sapiens R-HSA-110373	3/22	0.349322	0.999995	0	0	1.5032	1.58101	FEN1;LIG1;RPA2
Telomere C-strand (Lagging Strand) Synthesis Homo sapiens R-HSA-174417	3/22	0.349322	0.999995	0	0	1.5032	1.58101	FEN1;LIG1;RPA2
TNF signaling Homo sapiens R-HSA-75893	5/41	0.350241	0.999995	0	0	1.32241	1.38738	CYLD;ADAM17;XIAP;NSMAF;BIRC3
Stimuli-sensing channels Homo sapiens R-HSA-2672351	11/100	0.352506	0.999995	0	0	1.17707	1.22731	CLCN7;CLCN6;CLCN5;CLCN4;OSTM1;WNK1;ANO8;CLCN3;MCOLN1;ASIC3;BEST1
NF-kB is activated and signals survival Homo sapiens R-HSA-209560	2/13	0.354564	0.999995	0	0	1.73081	1.79462	SQSTM1;RELA
FGFRL1 modulation of FGFR1 signaling Homo sapiens R-HSA-5658623	2/13	0.354564	0.999995	0	0	1.73081	1.79462	SPRED2;FGF2
FGFR3c ligand binding and activation Homo sapiens R-HSA-190372	2/13	0.354564	0.999995	0	0	1.73081	1.79462	GALNT3;FGF2
FGFR3 ligand binding and activation Homo sapiens R-HSA-190239	2/13	0.354564	0.999995	0	0	1.73081	1.79462	GALNT3;FGF2
p38MAPK events Homo sapiens R-HSA-171007	2/13	0.354564	0.999995	0	0	1.73081	1.79462	RALA;MAPK13
DEx/H-box helicases activate type I IFN and inflammatory cytokines production Homo sapiens R-HSA-3134963	2/13	0.354564	0.999995	0	0	1.73081	1.79462	RELA;NFKB2
Nuclear Receptor transcription pathway Homo sapiens R-HSA-383280	6/51	0.356203	0.999995	0	0	1.26955	1.3105	NR4A2;AR;NR4A3;PPARG;PPARA;ESR1
Cell-cell junction organization Homo sapiens R-HSA-421270	7/61	0.359939	0.999995	0	0	1.23432	1.26126	CLDN3;PARD6A;CLDN15;CLDN12;ANG;CDH15;CLDN1
Phospholipid metabolism Homo sapiens R-HSA-1483257	17/161	0.362171	0.999995	0	0	1.12444	1.14202	DMGDH;AGPAT5;VAC14;PCYT2;DGAT2;CHKA;ABHD3;PNPLA8;LPCAT1;PLD6;PIK3C2A;PIKFYVE;SYNJ1;INPP5J;CEPT1;LPIN1;PI4K2A
HIV elongation arrest and recovery Homo sapiens R-HSA-167287	4/32	0.362747	0.999995	0	0	1.36008	1.37919	CCNT1;GTF2F1;SUPT5H;NELFE
Pausing and recovery of HIV elongation Homo sapiens R-HSA-167290	4/32	0.362747	0.999995	0	0	1.36008	1.37919	CCNT1;GTF2F1;SUPT5H;NELFE
Elongation arrest and recovery Homo sapiens R-HSA-112387	4/32	0.362747	0.999995	0	0	1.36008	1.37919	CCNT1;GTF2F1;SUPT5H;NELFE
HIV Life Cycle Homo sapiens R-HSA-162587	15/141	0.363673	0.999995	0	0	1.13382	1.14686	NDC1;RANBP2;FEN1;CCNT1;LIG1;RNMT;TAF13;TAF9;GTF2F1;AAAS;SUPT5H;CHMP4C;TAF4B;TAF5;NELFE
Peptide hormone metabolism Homo sapiens R-HSA-2980736	9/81	0.363738	0.999995	0	0	1.19031	1.20378	SLC30A7;SLC30A6;ACE;MME;SLC30A5;EXOC6;KLF4;SEC11C;INHBE
Transport of glucose and other sugars, bile salts and organic acids, metal ions and amine compounds Homo sapiens R-HSA-425366	11/101	0.364903	0.999995	0	0	1.16392	1.17338	SLC30A7;SLC30A6;SLC22A5;SLC22A15;SLC31A1;SLC30A5;SLC41A2;SLC11A2;SLC39A8;SLC5A3;FGF21
Glucose transport Homo sapiens R-HSA-70153	5/42	0.369786	0.999995	0	0	1.2866	1.27995	RANBP2;NDC1;GCKR;AAAS;FGF21
Abortive elongation of HIV-1 transcript in the absence of Tat Homo sapiens R-HSA-167242	3/23	0.376263	0.999995	0	0	1.42796	1.39579	GTF2F1;SUPT5H;NELFE
BBSome-mediated cargo-targeting to cilium Homo sapiens R-HSA-5620922	3/23	0.376263	0.999995	0	0	1.42796	1.39579	TTC8;RAB3IP;LZTFL1
Signaling by BMP Homo sapiens R-HSA-201451	3/23	0.376263	0.999995	0	0	1.42796	1.39579	BMP2;BMPR1B;ACVR2B
Glycerophospholipid biosynthesis Homo sapiens R-HSA-1483206	11/102	0.377356	0.999995	0	0	1.15107	1.12179	DMGDH;AGPAT5;PCYT2;DGAT2;CHKA;ABHD3;PNPLA8;LPCAT1;PLD6;CEPT1;LPIN1
MyD88:Mal cascade initiated on plasma membrane Homo sapiens R-HSA-166058	10/92	0.377675	0.999995	0	0	1.16124	1.13073	DUSP4;RPS6KA5;IRAK2;LY96;IRAK3;TLR6;NOD2;RELA;NFKB2;NFKBIB
Toll Like Receptor TLR1:TLR2 Cascade Homo sapiens R-HSA-168179	10/92	0.377675	0.999995	0	0	1.16124	1.13073	DUSP4;RPS6KA5;IRAK2;LY96;IRAK3;TLR6;NOD2;RELA;NFKB2;NFKBIB
Toll Like Receptor TLR6:TLR2 Cascade Homo sapiens R-HSA-168188	10/92	0.377675	0.999995	0	0	1.16124	1.13073	DUSP4;RPS6KA5;IRAK2;LY96;IRAK3;TLR6;NOD2;RELA;NFKB2;NFKBIB
Toll Like Receptor 2 (TLR2) Cascade Homo sapiens R-HSA-181438	10/92	0.377675	0.999995	0	0	1.16124	1.13073	DUSP4;RPS6KA5;IRAK2;LY96;IRAK3;TLR6;NOD2;RELA;NFKB2;NFKBIB
Detoxification of Reactive Oxygen Species Homo sapiens R-HSA-3299685	4/33	0.385133	0.999995	0	0	1.31311	1.25292	PRDX5;CYCS;P4HB;ATP7A
Organic cation/anion/zwitterion transport Homo sapiens R-HSA-549132	2/14	0.390019	0.999995	0	0	1.58649	1.49378	SLC22A5;SLC22A15
Early Phase of HIV Life Cycle Homo sapiens R-HSA-162594	2/14	0.390019	0.999995	0	0	1.58649	1.49378	FEN1;LIG1
Removal of the Flap Intermediate Homo sapiens R-HSA-69166	2/14	0.390019	0.999995	0	0	1.58649	1.49378	FEN1;RPA2
Golgi Cisternae Pericentriolar Stack Reorganization Homo sapiens R-HSA-162658	2/14	0.390019	0.999995	0	0	1.58649	1.49378	GOLGA2;BLZF1
Inhibition of adenylate cyclase pathway Homo sapiens R-HSA-997269	2/14	0.390019	0.999995	0	0	1.58649	1.49378	GNAL;ADCY7
Adenylate cyclase inhibitory pathway Homo sapiens R-HSA-170670	2/14	0.390019	0.999995	0	0	1.58649	1.49378	GNAL;ADCY7
Methylation Homo sapiens R-HSA-156581	2/14	0.390019	0.999995	0	0	1.58649	1.49378	TPMT;MTR
Glutathione synthesis and recycling Homo sapiens R-HSA-174403	2/14	0.390019	0.999995	0	0	1.58649	1.49378	GGT1;CNDP2
Reversal of alkylation damage by DNA dioxygenases Homo sapiens R-HSA-73943	1/5	0.393291	0.999995	0	0	2.37954	2.2206	ASCC2
Na+-dependent glucose transporters Homo sapiens R-HSA-428808	1/5	0.393291	0.999995	0	0	2.37954	2.2206	SLC5A3
Electric Transmission Across Gap Junctions Homo sapiens R-HSA-112303	1/5	0.393291	0.999995	0	0	2.37954	2.2206	PANX2
Transmission across Electrical Synapses Homo sapiens R-HSA-112307	1/5	0.393291	0.999995	0	0	2.37954	2.2206	PANX2
N-glycan trimming and elongation in the cis-Golgi Homo sapiens R-HSA-964739	1/5	0.393291	0.999995	0	0	2.37954	2.2206	MAN1C1
IRS activation Homo sapiens R-HSA-74713	1/5	0.393291	0.999995	0	0	2.37954	2.2206	IRS2
PTK6 Expression Homo sapiens R-HSA-8849473	1/5	0.393291	0.999995	0	0	2.37954	2.2206	PELP1
GRB7 events in ERBB2 signaling Homo sapiens R-HSA-1306955	1/5	0.393291	0.999995	0	0	2.37954	2.2206	NRG1
NOSTRIN mediated eNOS trafficking Homo sapiens R-HSA-203641	1/5	0.393291	0.999995	0	0	2.37954	2.2206	NOSTRIN
SMAC binds to IAPs Homo sapiens R-HSA-111463	1/5	0.393291	0.999995	0	0	2.37954	2.2206	XIAP
SMAC-mediated dissociation of IAP:caspase complexes Homo sapiens R-HSA-111464	1/5	0.393291	0.999995	0	0	2.37954	2.2206	XIAP
SMAC-mediated apoptotic response Homo sapiens R-HSA-111469	1/5	0.393291	0.999995	0	0	2.37954	2.2206	XIAP
Cytochrome c-mediated apoptotic response Homo sapiens R-HSA-111461	1/5	0.393291	0.999995	0	0	2.37954	2.2206	CYCS
Activation of caspases through apoptosome-mediated cleavage Homo sapiens R-HSA-111459	1/5	0.393291	0.999995	0	0	2.37954	2.2206	CYCS
Vitamin B2 (riboflavin) metabolism Homo sapiens R-HSA-196843	1/5	0.393291	0.999995	0	0	2.37954	2.2206	ACP5
Propionyl-CoA catabolism Homo sapiens R-HSA-71032	1/5	0.393291	0.999995	0	0	2.37954	2.2206	MCEE
Alpha-oxidation of phytanate Homo sapiens R-HSA-389599	1/5	0.393291	0.999995	0	0	2.37954	2.2206	PHYH
Galactose catabolism Homo sapiens R-HSA-70370	1/5	0.393291	0.999995	0	0	2.37954	2.2206	GALE
RNA Polymerase II Transcription Homo sapiens R-HSA-73857	13/124	0.39888	0.999995	0	0	1.11519	1.02496	CCNT1;RNMT;TAF13;TAF9;UPF3B;THOC3;GTF2F1;SUPT5H;NUDT21;DDX39A;TAF4B;TAF5;NELFE
TRAF6 mediated NF-kB activation Homo sapiens R-HSA-933542	3/24	0.402965	0.999995	0	0	1.35989	1.23601	RELA;NFKB2;NFKBIB
TP53 Regulates Metabolic Genes Homo sapiens R-HSA-5628897	9/84	0.4056	0.999995	0	0	1.1425	1.03098	PRDX5;RRAGC;AGO3;RRAGD;CYCS;TSC1;PRKAB1;LAMTOR3;MTOR
HSF1-dependent transactivation Homo sapiens R-HSA-3371571	4/34	0.407416	0.999995	0	0	1.26927	1.1397	AKT1S1;MTOR;HSPA1B;DEDD2
Synthesis of PIPs at the plasma membrane Homo sapiens R-HSA-1660499	4/34	0.407416	0.999995	0	0	1.26927	1.1397	SYNJ1;INPP5J;PIK3C2A;PI4K2A
HDR through Homologous Recombination (HRR) Homo sapiens R-HSA-5685942	7/64	0.408147	0.999995	0	0	1.16916	1.04772	WRN;RAD50;TOP3A;RPA2;ATM;BRCA2;ATR
RNA Polymerase II HIV Promoter Escape Homo sapiens R-HSA-167162	5/44	0.40884	0.999995	0	0	1.22048	1.09164	TAF13;TAF9;TAF4B;TAF5;GTF2F1
RNA Polymerase II Promoter Escape Homo sapiens R-HSA-73776	5/44	0.40884	0.999995	0	0	1.22048	1.09164	TAF13;TAF9;TAF4B;TAF5;GTF2F1
RNA Polymerase II Transcription Initiation And Promoter Clearance Homo sapiens R-HSA-76042	5/44	0.40884	0.999995	0	0	1.22048	1.09164	TAF13;TAF9;TAF4B;TAF5;GTF2F1
RNA Polymerase II Transcription Initiation Homo sapiens R-HSA-75953	5/44	0.40884	0.999995	0	0	1.22048	1.09164	TAF13;TAF9;TAF4B;TAF5;GTF2F1
RNA Polymerase II Transcription Pre-Initiation And Promoter Opening Homo sapiens R-HSA-73779	5/44	0.40884	0.999995	0	0	1.22048	1.09164	TAF13;TAF9;TAF4B;TAF5;GTF2F1
HIV Transcription Initiation Homo sapiens R-HSA-167161	5/44	0.40884	0.999995	0	0	1.22048	1.09164	TAF13;TAF9;TAF4B;TAF5;GTF2F1
Inositol phosphate metabolism Homo sapiens R-HSA-1483249	5/44	0.40884	0.999995	0	0	1.22048	1.09164	IPPK;SYNJ1;PPIP5K2;INPP5J;IP6K3
Meiotic recombination Homo sapiens R-HSA-912446	6/54	0.408865	0.999995	0	0	1.19001	1.06431	RAD50;TOP3A;RPA2;ATM;BRCA2;MLH1
Meiosis Homo sapiens R-HSA-1500620	9/85	0.419583	0.999995	0	0	1.12741	0.979147	RAD50;STAG1;TOP3A;POT1;RPA2;ATM;BRCA2;MLH1;ATR
Calnexin/calreticulin cycle Homo sapiens R-HSA-901042	2/15	0.424571	0.999995	0	0	1.46437	1.25449	EDEM1;SYVN1
Glycogen breakdown (glycogenolysis) Homo sapiens R-HSA-70221	2/15	0.424571	0.999995	0	0	1.46437	1.25449	PHKG2;PHKA1
Elevation of cytosolic Ca2+ levels Homo sapiens R-HSA-139853	2/15	0.424571	0.999995	0	0	1.46437	1.25449	P2RX7;P2RX1
Eicosanoid ligand-binding receptors Homo sapiens R-HSA-391903	2/15	0.424571	0.999995	0	0	1.46437	1.25449	LTB4R2;LTB4R
SUMOylation of RNA binding proteins Homo sapiens R-HSA-4570464	5/45	0.428257	0.999995	0	0	1.18991	1.00908	RANBP2;NDC1;NOP58;AAAS;PHC3
Post-translational modification: synthesis of GPI-anchored proteins Homo sapiens R-HSA-163125	3/25	0.429325	0.999995	0	0	1.298	1.09752	PIGA;PIGL;PIGH
Antigen Presentation: Folding, assembly and peptide loading of class I MHC Homo sapiens R-HSA-983170	3/25	0.429325	0.999995	0	0	1.298	1.09752	SEC24A;HSPA5;SAR1B
Constitutive Signaling by AKT1 E17K in Cancer Homo sapiens R-HSA-5674400	3/25	0.429325	0.999995	0	0	1.298	1.09752	AKT1S1;FOXO4;MTOR
HDMs demethylate histones Homo sapiens R-HSA-3214842	3/25	0.429325	0.999995	0	0	1.298	1.09752	KDM6B;KDM4C;JMJD6
Basigin interactions Homo sapiens R-HSA-210991	3/25	0.429325	0.999995	0	0	1.298	1.09752	SLC7A8;MMP1;SLC7A11
Synthesis and interconversion of nucleotide di- and triphosphates Homo sapiens R-HSA-499943	3/25	0.429325	0.999995	0	0	1.298	1.09752	GLRX;NUDT13;AK9
Base Excision Repair Homo sapiens R-HSA-73884	4/35	0.429533	0.999995	0	0	1.22825	1.03794	MBD4;FEN1;LIG1;RPA2
Resolution of Abasic Sites (AP sites) Homo sapiens R-HSA-73933	4/35	0.429533	0.999995	0	0	1.22825	1.03794	MBD4;FEN1;LIG1;RPA2
SUMO E3 ligases SUMOylate target proteins Homo sapiens R-HSA-3108232	10/96	0.430438	0.999995	0	0	1.10699	0.933137	NDC1;RANBP2;MDC1;WRN;NOP58;STAG1;L3MBTL2;TP53BP1;AAAS;PHC3
Late Phase of HIV Life Cycle Homo sapiens R-HSA-162599	13/128	0.444735	0.999995	0	0	1.07616	0.871986	NDC1;RANBP2;CCNT1;RNMT;TAF13;TAF9;GTF2F1;AAAS;SUPT5H;CHMP4C;TAF4B;TAF5;NELFE
DNA Damage Reversal Homo sapiens R-HSA-73942	1/6	0.451003	0.999995	0	0	1.90352	1.51574	ASCC2
Fructose metabolism Homo sapiens R-HSA-5652084	1/6	0.451003	0.999995	0	0	1.90352	1.51574	GLYCTK
Pre-NOTCH Processing in the Endoplasmic Reticulum Homo sapiens R-HSA-1912399	1/6	0.451003	0.999995	0	0	1.90352	1.51574	NOTCH4
FGFR1b ligand binding and activation Homo sapiens R-HSA-190370	1/6	0.451003	0.999995	0	0	1.90352	1.51574	FGF2
TNFR1-mediated ceramide production Homo sapiens R-HSA-5626978	1/6	0.451003	0.999995	0	0	1.90352	1.51574	NSMAF
Misspliced LRP5 mutants have enhanced beta-catenin-dependent signaling Homo sapiens R-HSA-5339717	1/6	0.451003	0.999995	0	0	1.90352	1.51574	DKK1
Scavenging by Class F Receptors Homo sapiens R-HSA-3000484	1/6	0.451003	0.999995	0	0	1.90352	1.51574	HYOU1
CLEC7A/inflammasome pathway Homo sapiens R-HSA-5660668	1/6	0.451003	0.999995	0	0	1.90352	1.51574	RELA
Choline catabolism Homo sapiens R-HSA-6798163	1/6	0.451003	0.999995	0	0	1.90352	1.51574	DMGDH
Methionine salvage pathway Homo sapiens R-HSA-1237112	1/6	0.451003	0.999995	0	0	1.90352	1.51574	GOT1
Molybdenum cofactor biosynthesis Homo sapiens R-HSA-947581	1/6	0.451003	0.999995	0	0	1.90352	1.51574	MOCOS
Beta-oxidation of very long chain fatty acids Homo sapiens R-HSA-390247	1/6	0.451003	0.999995	0	0	1.90352	1.51574	ACOX1
Heme degradation Homo sapiens R-HSA-189483	1/6	0.451003	0.999995	0	0	1.90352	1.51574	HMOX1
Synthesis of 15-eicosatetraenoic acid derivatives Homo sapiens R-HSA-2142770	1/6	0.451003	0.999995	0	0	1.90352	1.51574	PTGS2
Protein repair Homo sapiens R-HSA-5676934	1/6	0.451003	0.999995	0	0	1.90352	1.51574	PCMT1
A tetrasaccharide linker sequence is required for GAG synthesis Homo sapiens R-HSA-1971475	3/26	0.455253	0.999995	0	0	1.2415	0.976938	BCAN;GXYLT1;B4GALT7
ZBP1(DAI) mediated induction of type I IFNs Homo sapiens R-HSA-1606322	3/26	0.455253	0.999995	0	0	1.2415	0.976938	RELA;NFKB2;NFKBIB
TNFR1-induced NFkappaB signaling pathway Homo sapiens R-HSA-5357956	3/26	0.455253	0.999995	0	0	1.2415	0.976938	CYLD;XIAP;BIRC3
Regulation of Complement cascade Homo sapiens R-HSA-977606	3/26	0.455253	0.999995	0	0	1.2415	0.976938	PROS1;C5AR1;CD55
Insulin receptor recycling Homo sapiens R-HSA-77387	3/26	0.455253	0.999995	0	0	1.2415	0.976938	ATP6V0B;ATP6V0E2;ATP6V1C1
Signaling by PTK6 Homo sapiens R-HSA-8848021	7/67	0.456153	0.999995	0	0	1.11052	0.871675	SPRED2;SRMS;GPNMB;LRRK2;NRG1;RASAL3;PELP1
p75NTR signals via NF-kB Homo sapiens R-HSA-193639	2/16	0.458072	0.999995	0	0	1.3597	1.06156	SQSTM1;RELA
JNK (c-Jun kinases) phosphorylation and activation mediated by activated human TAK1 Homo sapiens R-HSA-450321	2/16	0.458072	0.999995	0	0	1.3597	1.06156	IRAK2;NOD2
Metabolism of Angiotensinogen to Angiotensins Homo sapiens R-HSA-2022377	2/16	0.458072	0.999995	0	0	1.3597	1.06156	ACE;MME
Nucleotide-like (purinergic) receptors Homo sapiens R-HSA-418038	2/16	0.458072	0.999995	0	0	1.3597	1.06156	P2RY11;ADORA2B
Transcriptional Regulation by TP53 Homo sapiens R-HSA-3700989	34/348	0.460722	0.999995	0	0	1.03087	0.798879	MDC1;CCNT1;TAF9;CHM;PRDX5;WRN;E2F7;NELFE;PRMT5;CNOT6L;CSNK2A1;TAF13;TOP3A;RPA2;TSC1;CNOT10;TNFRSF10A;MLH1;GTF2F1;SUPT5H;PRKAB1;MTOR;RAD50;RRAGC;AGO3;CENPJ;RRAGD;JMY;TAF4B;CYCS;ATM;TAF5;LAMTOR3;ATR
Constitutive Signaling by NOTCH1 HD+PEST Domain Mutants Homo sapiens R-HSA-2894862	6/57	0.461107	0.999995	0	0	1.11982	0.866879	HDAC4;JAG2;ADAM17;HEY1;MIB2;HDAC6
Signaling by NOTCH1 in Cancer Homo sapiens R-HSA-2644603	6/57	0.461107	0.999995	0	0	1.11982	0.866879	HDAC4;JAG2;ADAM17;HEY1;MIB2;HDAC6
Signaling by NOTCH1 PEST Domain Mutants in Cancer Homo sapiens R-HSA-2644602	6/57	0.461107	0.999995	0	0	1.11982	0.866879	HDAC4;JAG2;ADAM17;HEY1;MIB2;HDAC6
Constitutive Signaling by NOTCH1 PEST Domain Mutants Homo sapiens R-HSA-2644606	6/57	0.461107	0.999995	0	0	1.11982	0.866879	HDAC4;JAG2;ADAM17;HEY1;MIB2;HDAC6
Signaling by NOTCH1 HD+PEST Domain Mutants in Cancer Homo sapiens R-HSA-2894858	6/57	0.461107	0.999995	0	0	1.11982	0.866879	HDAC4;JAG2;ADAM17;HEY1;MIB2;HDAC6
G2/M DNA damage checkpoint Homo sapiens R-HSA-69473	8/78	0.466418	0.999995	0	0	1.08783	0.829655	MDC1;WRN;RAD50;TOP3A;RPA2;ATM;TP53BP1;ATR
Regulation of TP53 Activity Homo sapiens R-HSA-5633007	15/151	0.469641	0.999995	0	0	1.04987	0.793476	PRMT5;CSNK2A1;TAF13;TOP3A;TAF9;RPA2;PRKAB1;MTOR;WRN;RAD50;JMY;TAF4B;ATM;TAF5;ATR
Transport of Mature mRNA derived from an Intron-Containing Transcript Homo sapiens R-HSA-159236	7/68	0.471994	0.999995	0	0	1.09225	0.820052	NDC1;RANBP2;NXT1;DDX39A;UPF3B;THOC3;AAAS
Activation of ATR in response to replication stress Homo sapiens R-HSA-176187	4/37	0.473034	0.999995	0	0	1.15369	0.863635	ORC6;ORC1;RPA2;ATR
NCAM1 interactions Homo sapiens R-HSA-419037	4/37	0.473034	0.999995	0	0	1.15369	0.863635	PRNP;PSPN;COL4A4;COL4A3
EGFR downregulation Homo sapiens R-HSA-182971	3/27	0.480672	0.999995	0	0	1.18971	0.871542	SPRY2;PTPRK;STAM
RNA Pol II CTD phosphorylation and interaction with CE Homo sapiens R-HSA-167160	3/27	0.480672	0.999995	0	0	1.18971	0.871542	RNMT;GTF2F1;SUPT5H
RNA Pol II CTD phosphorylation and interaction with CE Homo sapiens R-HSA-77075	3/27	0.480672	0.999995	0	0	1.18971	0.871542	RNMT;GTF2F1;SUPT5H
Peroxisomal lipid metabolism Homo sapiens R-HSA-390918	3/27	0.480672	0.999995	0	0	1.18971	0.871542	PHYH;ACOX1;IDH1
Pyruvate metabolism Homo sapiens R-HSA-70268	3/27	0.480672	0.999995	0	0	1.18971	0.871542	PDP2;MPC1;HAGH
Transcriptional regulation of white adipocyte differentiation Homo sapiens R-HSA-381340	8/79	0.481103	0.999995	0	0	1.07245	0.784679	SREBF1;CEBPA;MED10;MED31;PPARG;PPARA;KLF4;RELA
ABC transporters in lipid homeostasis Homo sapiens R-HSA-1369062	2/17	0.490409	0.999995	0	0	1.26898	0.904171	ABCA3;ABCA7
Hyaluronan metabolism Homo sapiens R-HSA-2142845	2/17	0.490409	0.999995	0	0	1.26898	0.904171	HYAL1;HYAL3
Tristetraprolin (TTP, ZFP36) binds and destabilizes mRNA Homo sapiens R-HSA-450513	2/17	0.490409	0.999995	0	0	1.26898	0.904171	ZFP36;DIS3
activated TAK1 mediates p38 MAPK activation Homo sapiens R-HSA-450302	2/17	0.490409	0.999995	0	0	1.26898	0.904171	IRAK2;NOD2
Ligand-dependent caspase activation Homo sapiens R-HSA-140534	2/17	0.490409	0.999995	0	0	1.26898	0.904171	LY96;TNFRSF10A
Synthesis, secretion, and deacylation of Ghrelin Homo sapiens R-HSA-422085	2/17	0.490409	0.999995	0	0	1.26898	0.904171	KLF4;SEC11C
Glutathione conjugation Homo sapiens R-HSA-156590	4/38	0.494315	0.999995	0	0	1.11969	0.788915	MGST1;AKR1A1;GGT1;CNDP2
SUMOylation Homo sapiens R-HSA-2990846	10/101	0.49587	0.999995	0	0	1.04587	0.733618	NDC1;RANBP2;MDC1;STAG1;WRN;NOP58;L3MBTL2;TP53BP1;AAAS;PHC3
Activated TLR4 signalling Homo sapiens R-HSA-166054	11/112	0.502066	0.999995	0	0	1.03653	0.714191	DUSP4;RPS6KA5;IRAK2;LY96;IRAK3;TLR6;NOD2;RELA;NFKB2;NFKBIB;BIRC3
Inositol transporters Homo sapiens R-HSA-429593	1/7	0.503228	0.999995	0	0	1.58618	1.08925	SLC5A3
Transport of nucleosides and free purine and pyrimidine bases across the plasma membrane Homo sapiens R-HSA-83936	1/7	0.503228	0.999995	0	0	1.58618	1.08925	SLC29A3
SLC transporter disorders Homo sapiens R-HSA-5619102	1/7	0.503228	0.999995	0	0	1.58618	1.08925	GCKR
Defective CHST3 causes SEDCJD Homo sapiens R-HSA-3595172	1/7	0.503228	0.999995	0	0	1.58618	1.08925	BCAN
Defective CHSY1 causes TPBS Homo sapiens R-HSA-3595177	1/7	0.503228	0.999995	0	0	1.58618	1.08925	BCAN
Defective CHST14 causes EDS, musculocontractural type Homo sapiens R-HSA-3595174	1/7	0.503228	0.999995	0	0	1.58618	1.08925	BCAN
Neurofascin interactions Homo sapiens R-HSA-447043	1/7	0.503228	0.999995	0	0	1.58618	1.08925	NRCAM
NrCAM interactions Homo sapiens R-HSA-447038	1/7	0.503228	0.999995	0	0	1.58618	1.08925	NRCAM
TRAIL signaling Homo sapiens R-HSA-75158	1/7	0.503228	0.999995	0	0	1.58618	1.08925	TNFRSF10A
Post-transcriptional silencing by small RNAs Homo sapiens R-HSA-426496	1/7	0.503228	0.999995	0	0	1.58618	1.08925	AGO3
Binding of TCF/LEF:CTNNB1 to target gene promoters Homo sapiens R-HSA-4411364	1/7	0.503228	0.999995	0	0	1.58618	1.08925	TCF7
CREB phosphorylation Homo sapiens R-HSA-199920	1/7	0.503228	0.999995	0	0	1.58618	1.08925	RPS6KA5
Phase 3 - rapid repolarisation Homo sapiens R-HSA-5576890	1/7	0.503228	0.999995	0	0	1.58618	1.08925	AKAP9
Acyl chain remodeling of DAG and TAG Homo sapiens R-HSA-1482883	1/7	0.503228	0.999995	0	0	1.58618	1.08925	DGAT2
Defective HLCS causes multiple carboxylase deficiency Homo sapiens R-HSA-3371599	1/7	0.503228	0.999995	0	0	1.58618	1.08925	ACACA
Defects in biotin (Btn) metabolism Homo sapiens R-HSA-3323169	1/7	0.503228	0.999995	0	0	1.58618	1.08925	ACACA
Phosphate bond hydrolysis by NUDT proteins Homo sapiens R-HSA-2393930	1/7	0.503228	0.999995	0	0	1.58618	1.08925	NUDT9
Synthesis of Ketone Bodies Homo sapiens R-HSA-77111	1/7	0.503228	0.999995	0	0	1.58618	1.08925	ACAT1
Highly sodium permeable acetylcholine nicotinic receptors Homo sapiens R-HSA-629587	1/7	0.503228	0.999995	0	0	1.58618	1.08925	CHRNE
Amino acid and oligopeptide SLC transporters Homo sapiens R-HSA-425374	5/49	0.504223	0.999995	0	0	1.08149	0.740538	SLC15A2;SLC7A8;SLC17A5;SLC7A11;SLC38A5
Extension of Telomeres Homo sapiens R-HSA-180786	3/28	0.505514	0.999995	0	0	1.14205	0.779085	FEN1;LIG1;RPA2
Processing of DNA double-strand break ends Homo sapiens R-HSA-5693607	8/81	0.510144	0.999995	0	0	1.04295	0.701968	MDC1;WRN;RAD50;TOP3A;RPA2;ATM;TP53BP1;ATR
PI Metabolism Homo sapiens R-HSA-1483255	6/60	0.512105	0.999995	0	0	1.05743	0.70766	VAC14;PIKFYVE;SYNJ1;INPP5J;PIK3C2A;PI4K2A
Lipid digestion, mobilization, and transport Homo sapiens R-HSA-73923	7/71	0.51872	0.999995	0	0	1.04088	0.683225	LIPE;FABP3;NCEH1;SAR1B;APOA4;P4HB;LMF2
Pre-NOTCH Processing in Golgi Homo sapiens R-HSA-1912420	2/18	0.521499	0.999995	0	0	1.18961	0.774489	NOTCH4;ST3GAL6
Signaling by cytosolic FGFR1 fusion mutants Homo sapiens R-HSA-1839117	2/18	0.521499	0.999995	0	0	1.18961	0.774489	TRIM24;GAB2
Defects in vitamin and cofactor metabolism Homo sapiens R-HSA-3296482	2/18	0.521499	0.999995	0	0	1.18961	0.774489	MTR;ACACA
Chondroitin sulfate/dermatan sulfate metabolism Homo sapiens R-HSA-1793185	5/50	0.522612	0.999995	0	0	1.0574	0.686164	BCAN;HYAL1;HYAL3;GXYLT1;B4GALT7
Interaction between L1 and Ankyrins Homo sapiens R-HSA-445095	3/29	0.529723	0.999995	0	0	1.09807	0.697713	NRCAM;ANK2;SCN3B
COPI-independent Golgi-to-ER retrograde traffic Homo sapiens R-HSA-6811436	3/29	0.529723	0.999995	0	0	1.09807	0.697713	DYNC2H1;RAB18;RAB3GAP2
mRNA Capping Homo sapiens R-HSA-72086	3/29	0.529723	0.999995	0	0	1.09807	0.697713	RNMT;GTF2F1;SUPT5H
Myogenesis Homo sapiens R-HSA-525793	3/29	0.529723	0.999995	0	0	1.09807	0.697713	SPAG9;CDH15;CDON
CDO in myogenesis Homo sapiens R-HSA-375170	3/29	0.529723	0.999995	0	0	1.09807	0.697713	SPAG9;CDH15;CDON
TRAF6 Mediated Induction of proinflammatory cytokines Homo sapiens R-HSA-168180	7/72	0.533964	0.999995	0	0	1.02481	0.642994	DUSP4;RPS6KA5;IRAK2;NOD2;RELA;NFKB2;NFKBIB
PKMTs methylate histone lysines Homo sapiens R-HSA-3214841	4/40	0.535721	0.999995	0	0	1.05737	0.659949	KMT2A;KMT2C;SETD7;SETDB2
Organic anion transporters Homo sapiens R-HSA-428643	1/8	0.550488	0.999995	0	0	1.35951	0.81156	SLC17A5
Defective CSF2RB causes pulmonary surfactant metabolism dysfunction 5 (SMDP5) Homo sapiens R-HSA-5688849	1/8	0.550488	0.999995	0	0	1.35951	0.81156	CSF2RB
Defective CSF2RA causes pulmonary surfactant metabolism dysfunction 4 (SMDP4) Homo sapiens R-HSA-5688890	1/8	0.550488	0.999995	0	0	1.35951	0.81156	CSF2RB
Cleavage of the damaged pyrimidine Homo sapiens R-HSA-110329	1/8	0.550488	0.999995	0	0	1.35951	0.81156	MBD4
Recognition and association of DNA glycosylase with site containing an affected pyrimidine Homo sapiens R-HSA-110328	1/8	0.550488	0.999995	0	0	1.35951	0.81156	MBD4
Depyrimidination Homo sapiens R-HSA-73928	1/8	0.550488	0.999995	0	0	1.35951	0.81156	MBD4
Release of Hh-Np from the secreting cell Homo sapiens R-HSA-5362798	1/8	0.550488	0.999995	0	0	1.35951	0.81156	ADAM17
Ligand-receptor interactions Homo sapiens R-HSA-5632681	1/8	0.550488	0.999995	0	0	1.35951	0.81156	CDON
WNT mediated activation of DVL Homo sapiens R-HSA-201688	1/8	0.550488	0.999995	0	0	1.35951	0.81156	CSNK2A1
Downregulation of ERBB4 signaling Homo sapiens R-HSA-1253288	1/8	0.550488	0.999995	0	0	1.35951	0.81156	NEDD4
RNF mutants show enhanced WNT signaling and proliferation Homo sapiens R-HSA-5340588	1/8	0.550488	0.999995	0	0	1.35951	0.81156	FZD5
Axonal growth inhibition (RHOA activation) Homo sapiens R-HSA-193634	1/8	0.550488	0.999995	0	0	1.35951	0.81156	ARHGEF1
Synthesis of PG Homo sapiens R-HSA-1483148	1/8	0.550488	0.999995	0	0	1.35951	0.81156	PLD6
Coenzyme A biosynthesis Homo sapiens R-HSA-196783	1/8	0.550488	0.999995	0	0	1.35951	0.81156	PANK3
Metabolism of ingested SeMet, Sec, MeSec into H2Se Homo sapiens R-HSA-2408508	1/8	0.550488	0.999995	0	0	1.35951	0.81156	CTH
Synthesis of epoxy (EET) and dihydroxyeicosatrienoic acids (DHET) Homo sapiens R-HSA-2142670	1/8	0.550488	0.999995	0	0	1.35951	0.81156	CYP1B1
Signaling by FGFR2 IIIa TM Homo sapiens R-HSA-8851708	2/19	0.551289	0.999995	0	0	1.11957	0.666697	GTF2F1;FGF2
Scavenging by Class A Receptors Homo sapiens R-HSA-3000480	2/19	0.551289	0.999995	0	0	1.11957	0.666697	FTH1;FTL
Phase 4 - resting membrane potential Homo sapiens R-HSA-5576886	2/19	0.551289	0.999995	0	0	1.11957	0.666697	KCNJ14;KCNJ2
NEP/NS2 Interacts with the Cellular Export Machinery Homo sapiens R-HSA-168333	3/30	0.553253	0.999995	0	0	1.05734	0.625881	RANBP2;NDC1;AAAS
Transport of Ribonucleoproteins into the Host Nucleus Homo sapiens R-HSA-168271	3/30	0.553253	0.999995	0	0	1.05734	0.625881	RANBP2;NDC1;AAAS
Activation of the pre-replicative complex Homo sapiens R-HSA-68962	3/30	0.553253	0.999995	0	0	1.05734	0.625881	ORC6;ORC1;RPA2
Activated NOTCH1 Transmits Signal to the Nucleus Homo sapiens R-HSA-2122948	3/30	0.553253	0.999995	0	0	1.05734	0.625881	JAG2;ADAM17;MIB2
Transport of Mature Transcript to Cytoplasm Homo sapiens R-HSA-72202	7/74	0.563849	0.999995	0	0	0.994109	0.569594	NDC1;RANBP2;NXT1;DDX39A;UPF3B;THOC3;AAAS
Ion channel transport Homo sapiens R-HSA-983712	19/203	0.564567	0.999995	0	0	0.982377	0.56162	ATP6V0B;ATP8A1;ATP13A1;ANO8;ATP11A;CLCN3;MCOLN1;BEST1;CLCN7;CLCN6;CLCN5;CLCN4;OSTM1;GLRB;WNK1;ATP6V0E2;ATP7A;ASIC3;ATP6V1C1
Retinoid metabolism and transport Homo sapiens R-HSA-975634	4/42	0.57535	0.999995	0	0	1.00161	0.553665	RDH11;AKR1C1;APOA4;LRP8
Intrinsic Pathway for Apoptosis Homo sapiens R-HSA-109606	4/42	0.57535	0.999995	0	0	1.00161	0.553665	BCL2L11;BCL2;XIAP;CYCS
Viral Messenger RNA Synthesis Homo sapiens R-HSA-168325	4/42	0.57535	0.999995	0	0	1.00161	0.553665	RANBP2;NDC1;AAAS;GTF2F1
Amino acid transport across the plasma membrane Homo sapiens R-HSA-352230	3/31	0.576067	0.999995	0	0	1.01952	0.562299	SLC7A8;SLC7A11;SLC38A5
Export of Viral Ribonucleoproteins from Nucleus Homo sapiens R-HSA-168274	3/31	0.576067	0.999995	0	0	1.01952	0.562299	RANBP2;NDC1;AAAS
FGFR1 mutant receptor activation Homo sapiens R-HSA-1839124	3/31	0.576067	0.999995	0	0	1.01952	0.562299	TRIM24;GAB2;FGF2
Regulation of TNFR1 signaling Homo sapiens R-HSA-5357905	3/31	0.576067	0.999995	0	0	1.01952	0.562299	CYLD;XIAP;BIRC3
Hedgehog ligand biogenesis Homo sapiens R-HSA-5358346	6/64	0.577003	0.999995	0	0	0.984286	0.541267	ERLEC1;ADAM17;PSMD12;PSMC4;SYVN1;P4HB
SUMOylation of DNA damage response and repair proteins Homo sapiens R-HSA-3108214	7/75	0.578459	0.999995	0	0	0.979435	0.53613	NDC1;RANBP2;MDC1;WRN;STAG1;AAAS;PHC3
Defective C1GALT1C1 causes Tn polyagglutination syndrome (TNPS) Homo sapiens R-HSA-5083632	2/20	0.579744	0.999995	0	0	1.05731	0.576413	C1GALT1;MUC20
FGFR2 ligand binding and activation Homo sapiens R-HSA-190241	2/20	0.579744	0.999995	0	0	1.05731	0.576413	FGFBP3;FGF2
Hormone-sensitive lipase (HSL)-mediated triacylglycerol hydrolysis Homo sapiens R-HSA-163560	2/20	0.579744	0.999995	0	0	1.05731	0.576413	LIPE;FABP3
MyD88-independent TLR3/TLR4 cascade Homo sapiens R-HSA-166166	9/97	0.58184	0.999995	0	0	0.973023	0.526951	DUSP4;RPS6KA5;IRAK2;LY96;NOD2;RELA;NFKB2;NFKBIB;BIRC3
Toll Like Receptor 3 (TLR3) Cascade Homo sapiens R-HSA-168164	9/97	0.58184	0.999995	0	0	0.973023	0.526951	DUSP4;RPS6KA5;IRAK2;LY96;NOD2;RELA;NFKB2;NFKBIB;BIRC3
TRIF-mediated TLR3/TLR4 signaling Homo sapiens R-HSA-937061	9/97	0.58184	0.999995	0	0	0.973023	0.526951	DUSP4;RPS6KA5;IRAK2;LY96;NOD2;RELA;NFKB2;NFKBIB;BIRC3
G2/M Transition Homo sapiens R-HSA-69275	16/173	0.585041	0.999995	0	0	0.96945	0.519696	CEP57;PSMD12;BORA;FKBPL;ODF2;CCP110;TUBA4A;PSMC4;CENPJ;AKAP9;CEP70;ALMS1;TUBGCP5;CEP192;CEP76;LIN52
Sperm Motility And Taxes Homo sapiens R-HSA-1300642	1/9	0.593253	0.999995	0	0	1.18951	0.621081	CATSPER1
Bicarbonate transporters Homo sapiens R-HSA-425381	1/9	0.593253	0.999995	0	0	1.18951	0.621081	SLC4A8
Transport of nucleotide sugars Homo sapiens R-HSA-727802	1/9	0.593253	0.999995	0	0	1.18951	0.621081	SLC35A3
Displacement of DNA glycosylase by APEX1 Homo sapiens R-HSA-110357	1/9	0.593253	0.999995	0	0	1.18951	0.621081	MBD4
Transport of gamma-carboxylated protein precursors from the endoplasmic reticulum to the Golgi apparatus Homo sapiens R-HSA-159763	1/9	0.593253	0.999995	0	0	1.18951	0.621081	PROS1
Cohesin Loading onto Chromatin Homo sapiens R-HSA-2470946	1/9	0.593253	0.999995	0	0	1.18951	0.621081	STAG1
AKT phosphorylates targets in the nucleus Homo sapiens R-HSA-198693	1/9	0.593253	0.999995	0	0	1.18951	0.621081	FOXO4
A third proteolytic cleavage releases NICD Homo sapiens R-HSA-157212	1/9	0.593253	0.999995	0	0	1.18951	0.621081	NOTCH4
RHO GTPases Activate Rhotekin and Rhophilins Homo sapiens R-HSA-5666185	1/9	0.593253	0.999995	0	0	1.18951	0.621081	LIN7B
Adrenoceptors Homo sapiens R-HSA-390696	1/9	0.593253	0.999995	0	0	1.18951	0.621081	ADRA2C
p75NTR regulates axonogenesis Homo sapiens R-HSA-193697	1/9	0.593253	0.999995	0	0	1.18951	0.621081	ARHGEF1
Degradation of cysteine and homocysteine Homo sapiens R-HSA-1614558	1/9	0.593253	0.999995	0	0	1.18951	0.621081	CTH
Synthesis of (16-20)-hydroxyeicosatetraenoic acids (HETE) Homo sapiens R-HSA-2142816	1/9	0.593253	0.999995	0	0	1.18951	0.621081	CYP1B1
Pyrimidine salvage reactions Homo sapiens R-HSA-73614	1/9	0.593253	0.999995	0	0	1.18951	0.621081	UPP1
Interleukin-19, 20, 22, 24 Homo sapiens R-HSA-8854691	1/9	0.593253	0.999995	0	0	1.18951	0.621081	IL20RB
Metabolism of nucleotides Homo sapiens R-HSA-15869	8/87	0.593527	0.999995	0	0	0.963415	0.502588	NUDT9;PPAT;ADK;GLRX;NT5M;UPP1;NUDT13;AK9
HIV Transcription Elongation Homo sapiens R-HSA-167169	4/43	0.594429	0.999995	0	0	0.975872	0.507604	CCNT1;GTF2F1;SUPT5H;NELFE
Tat-mediated elongation of the HIV-1 transcript Homo sapiens R-HSA-167246	4/43	0.594429	0.999995	0	0	0.975872	0.507604	CCNT1;GTF2F1;SUPT5H;NELFE
Formation of HIV-1 elongation complex containing HIV-1 Tat Homo sapiens R-HSA-167200	4/43	0.594429	0.999995	0	0	0.975872	0.507604	CCNT1;GTF2F1;SUPT5H;NELFE
Activation of Matrix Metalloproteinases Homo sapiens R-HSA-1592389	3/32	0.598134	0.999995	0	0	0.984311	0.505877	MMP16;MMP1;MMP15
Nuclear import of Rev protein Homo sapiens R-HSA-180746	3/32	0.598134	0.999995	0	0	0.984311	0.505877	RANBP2;NDC1;AAAS
Vpr-mediated nuclear import of PICs Homo sapiens R-HSA-180910	3/32	0.598134	0.999995	0	0	0.984311	0.505877	RANBP2;NDC1;AAAS
DNA strand elongation Homo sapiens R-HSA-69190	3/32	0.598134	0.999995	0	0	0.984311	0.505877	FEN1;LIG1;RPA2
SMAD2/SMAD3:SMAD4 heterotrimer regulates transcription Homo sapiens R-HSA-2173796	3/32	0.598134	0.999995	0	0	0.984311	0.505877	CDKN2B;CCNT1;E2F5
Gluconeogenesis Homo sapiens R-HSA-70263	3/32	0.598134	0.999995	0	0	0.984311	0.505877	GOT1;MDH1;PGAM2
Signaling by Robo receptor Homo sapiens R-HSA-376176	3/32	0.598134	0.999995	0	0	0.984311	0.505877	ROBO3;ARHGAP39;SRGAP3
Mitotic G2-G2/M phases Homo sapiens R-HSA-453274	16/175	0.603982	0.999995	0	0	0.957149	0.482604	CEP57;PSMD12;BORA;FKBPL;ODF2;CCP110;TUBA4A;PSMC4;CENPJ;AKAP9;CEP70;ALMS1;TUBGCP5;CEP192;CEP76;LIN52
NOTCH2 Activation and Transmission of Signal to the Nucleus Homo sapiens R-HSA-2979096	2/21	0.606847	0.999995	0	0	1.00161	0.500281	JAG2;MIB2
ERK/MAPK targets Homo sapiens R-HSA-198753	2/21	0.606847	0.999995	0	0	1.00161	0.500281	DUSP4;RPS6KA5
Regulation of Insulin-like Growth Factor (IGF) transport and uptake by Insulin-like Growth Factor Binding Proteins (IGFBPs) Homo sapiens R-HSA-381426	2/21	0.606847	0.999995	0	0	1.00161	0.500281	MMP1;PAPPA2
Aflatoxin activation and detoxification Homo sapiens R-HSA-5423646	2/21	0.606847	0.999995	0	0	1.00161	0.500281	MGST1;GGT1
O-linked glycosylation of mucins Homo sapiens R-HSA-913709	6/66	0.607774	0.999995	0	0	0.951371	0.473737	GALNT12;GALNT3;B3GNT5;C1GALT1;GCNT3;MUC20
Formation of HIV elongation complex in the absence of HIV Tat Homo sapiens R-HSA-167152	4/44	0.612988	0.999995	0	0	0.951423	0.465636	CCNT1;GTF2F1;SUPT5H;NELFE
RNA Polymerase II Transcription Elongation Homo sapiens R-HSA-75955	4/44	0.612988	0.999995	0	0	0.951423	0.465636	CCNT1;GTF2F1;SUPT5H;NELFE
Formation of RNA Pol II elongation complex Homo sapiens R-HSA-112382	4/44	0.612988	0.999995	0	0	0.951423	0.465636	CCNT1;GTF2F1;SUPT5H;NELFE
Interleukin-1 signaling Homo sapiens R-HSA-446652	4/44	0.612988	0.999995	0	0	0.951423	0.465636	IRAK2;IRAK3;NOD2;SQSTM1
Toll Like Receptor 4 (TLR4) Cascade Homo sapiens R-HSA-166016	11/122	0.619272	0.999995	0	0	0.942621	0.451713	DUSP4;RPS6KA5;IRAK2;LY96;IRAK3;TLR6;NOD2;RELA;NFKB2;NFKBIB;BIRC3
Transport of the SLBP independent Mature mRNA Homo sapiens R-HSA-159227	3/33	0.619434	0.999995	0	0	0.951448	0.455695	RANBP2;NDC1;AAAS
Rev-mediated nuclear export of HIV RNA Homo sapiens R-HSA-165054	3/33	0.619434	0.999995	0	0	0.951448	0.455695	RANBP2;NDC1;AAAS
Formation of the Early Elongation Complex Homo sapiens R-HSA-113418	3/33	0.619434	0.999995	0	0	0.951448	0.455695	GTF2F1;SUPT5H;NELFE
Formation of the HIV-1 Early Elongation Complex Homo sapiens R-HSA-167158	3/33	0.619434	0.999995	0	0	0.951448	0.455695	GTF2F1;SUPT5H;NELFE
ABC-family proteins mediated transport Homo sapiens R-HSA-382556	4/45	0.63101	0.999995	0	0	0.928166	0.427359	ABCC4;ABCA3;ABCB8;ABCA7
Diseases of metabolism Homo sapiens R-HSA-5668914	4/45	0.63101	0.999995	0	0	0.928166	0.427359	IDH1;MTR;CSF2RB;ACACA
Zinc influx into cells by the SLC39 gene family Homo sapiens R-HSA-442380	1/10	0.631952	0.999995	0	0	1.05728	0.485229	SLC39A8
Diseases associated with surfactant metabolism Homo sapiens R-HSA-5687613	1/10	0.631952	0.999995	0	0	1.05728	0.485229	CSF2RB
Base-Excision Repair, AP Site Formation Homo sapiens R-HSA-73929	1/10	0.631952	0.999995	0	0	1.05728	0.485229	MBD4
Removal of aminoterminal propeptides from gamma-carboxylated proteins Homo sapiens R-HSA-159782	1/10	0.631952	0.999995	0	0	1.05728	0.485229	PROS1
Reactions specific to the complex N-glycan synthesis pathway Homo sapiens R-HSA-975578	1/10	0.631952	0.999995	0	0	1.05728	0.485229	FUCA1
Activation of PPARGC1A (PGC-1alpha) by phosphorylation Homo sapiens R-HSA-2151209	1/10	0.631952	0.999995	0	0	1.05728	0.485229	PRKAB1
POU5F1 (OCT4), SOX2, NANOG repress genes related to differentiation Homo sapiens R-HSA-2892245	1/10	0.631952	0.999995	0	0	1.05728	0.485229	DKK1
Signal attenuation Homo sapiens R-HSA-74749	1/10	0.631952	0.999995	0	0	1.05728	0.485229	IRS2
IRAK2 mediated activation of TAK1 complex upon TLR7/8 or 9 stimulation Homo sapiens R-HSA-975163	1/10	0.631952	0.999995	0	0	1.05728	0.485229	IRAK2
IRAK2 mediated activation of TAK1 complex Homo sapiens R-HSA-937042	1/10	0.631952	0.999995	0	0	1.05728	0.485229	IRAK2
TRIF-mediated programmed cell death Homo sapiens R-HSA-2562578	1/10	0.631952	0.999995	0	0	1.05728	0.485229	LY96
Regulation of signaling by NODAL Homo sapiens R-HSA-1433617	1/10	0.631952	0.999995	0	0	1.05728	0.485229	ACVR2B
Glycoprotein hormones Homo sapiens R-HSA-209822	1/10	0.631952	0.999995	0	0	1.05728	0.485229	INHBE
CD28 dependent PI3K/Akt signaling Homo sapiens R-HSA-389357	2/22	0.6326	0.999995	0	0	0.951474	0.435696	TRIB3;MTOR
Glucose metabolism Homo sapiens R-HSA-70326	7/79	0.634385	0.999995	0	0	0.924817	0.420883	PFKFB2;GNPDA1;GOT1;MDH1;PGAM2;PHKG2;PHKA1
Transport of the SLBP Dependant Mature mRNA Homo sapiens R-HSA-159230	3/34	0.639952	0.999995	0	0	0.920705	0.410968	RANBP2;NDC1;AAAS
Nuclear Pore Complex (NPC) Disassembly Homo sapiens R-HSA-3301854	3/34	0.639952	0.999995	0	0	0.920705	0.410968	RANBP2;NDC1;AAAS
Signaling by WNT in cancer Homo sapiens R-HSA-4791275	3/34	0.639952	0.999995	0	0	0.920705	0.410968	FZD5;TNKS;DKK1
Lipoprotein metabolism Homo sapiens R-HSA-174824	3/34	0.639952	0.999995	0	0	0.920705	0.410968	SAR1B;APOA4;P4HB
ROS, RNS production in response to bacteria Homo sapiens R-HSA-1222556	3/34	0.639952	0.999995	0	0	0.920705	0.410968	ATP6V0B;ATP6V0E2;ATP6V1C1
rRNA processing Homo sapiens R-HSA-72312	16/180	0.64957	0.999995	0	0	0.927709	0.400255	WDR36;NOP58;UTP6;PNO1;IMP4;NOC4L;THUMPD1;UTP18;WDR43;NOL6;EMG1;PES1;GAR1;TSR1;DCAF13;PELP1
Signaling by Hedgehog Homo sapiens R-HSA-5358351	12/136	0.650727	0.999995	0	0	0.920328	0.395433	DYNC2H1;ERLEC1;ADAM17;PSMD12;PSMC4;IFT172;SYVN1;TULP3;RPGRIP1L;P4HB;ADCY7;CDON
SLC-mediated transmembrane transport Homo sapiens R-HSA-425407	24/268	0.652946	0.999995	0	0	0.935107	0.3986	NDC1;RANBP2;SLC30A7;SLC30A6;GCKR;SLC22A5;SLC15A2;SLC35A3;SLC31A1;SLC30A5;SLC41A2;SLC11A2;CTNS;SLC7A11;AAAS;SLC5A3;SLC4A8;SLC22A15;SLC7A8;SLC17A5;SLC39A8;SLC29A3;SLC38A5;FGF21
Dopamine Neurotransmitter Release Cycle Homo sapiens R-HSA-212676	2/23	0.657013	0.999995	0	0	0.906115	0.380615	LIN7B;PPFIA3
The canonical retinoid cycle in rods (twilight vision) Homo sapiens R-HSA-2453902	2/23	0.657013	0.999995	0	0	0.906115	0.380615	RDH11;CYP4V2
Deadenylation of mRNA Homo sapiens R-HSA-429947	2/23	0.657013	0.999995	0	0	0.906115	0.380615	CNOT6L;CNOT10
Gap-filling DNA repair synthesis and ligation in GG-NER Homo sapiens R-HSA-5696397	2/23	0.657013	0.999995	0	0	0.906115	0.380615	LIG1;RPA2
RAF-independent MAPK1/3 activation Homo sapiens R-HSA-112409	2/23	0.657013	0.999995	0	0	0.906115	0.380615	DUSP4;DUSP9
Branched-chain amino acid catabolism Homo sapiens R-HSA-70895	2/23	0.657013	0.999995	0	0	0.906115	0.380615	PPM1K;ACAT1
Interactions of Rev with host cellular proteins Homo sapiens R-HSA-177243	3/35	0.659679	0.999995	0	0	0.891884	0.371026	RANBP2;NDC1;AAAS
Interactions of Vpr with host cellular proteins Homo sapiens R-HSA-176033	3/35	0.659679	0.999995	0	0	0.891884	0.371026	RANBP2;NDC1;AAAS
Fanconi Anemia Pathway Homo sapiens R-HSA-6783310	3/35	0.659679	0.999995	0	0	0.891884	0.371026	RPA2;FAN1;ATR
Dermatan sulfate biosynthesis Homo sapiens R-HSA-2022923	1/11	0.666971	0.999995	0	0	0.951499	0.385365	BCAN
Import of palmitoyl-CoA into the mitochondrial matrix Homo sapiens R-HSA-200425	1/11	0.666971	0.999995	0	0	0.951499	0.385365	ACACA
Signaling by NOTCH3 Homo sapiens R-HSA-1980148	1/11	0.666971	0.999995	0	0	0.951499	0.385365	JAG2
FGFR1c ligand binding and activation Homo sapiens R-HSA-190373	1/11	0.666971	0.999995	0	0	0.951499	0.385365	FGF2
Signaling by activated point mutants of FGFR1 Homo sapiens R-HSA-1839122	1/11	0.666971	0.999995	0	0	0.951499	0.385365	FGF2
DSCAM interactions Homo sapiens R-HSA-376172	1/11	0.666971	0.999995	0	0	0.951499	0.385365	MAPK13
CASP8 activity is inhibited Homo sapiens R-HSA-5218900	1/11	0.666971	0.999995	0	0	0.951499	0.385365	TNFRSF10A
Regulation by c-FLIP Homo sapiens R-HSA-3371378	1/11	0.666971	0.999995	0	0	0.951499	0.385365	TNFRSF10A
Dimerization of procaspase-8 Homo sapiens R-HSA-69416	1/11	0.666971	0.999995	0	0	0.951499	0.385365	TNFRSF10A
Recruitment of NuMA to mitotic centrosomes Homo sapiens R-HSA-380320	1/11	0.666971	0.999995	0	0	0.951499	0.385365	TUBGCP5
Condensation of Prometaphase Chromosomes Homo sapiens R-HSA-2514853	1/11	0.666971	0.999995	0	0	0.951499	0.385365	CSNK2A1
RHO GTPases activate KTN1 Homo sapiens R-HSA-5625970	1/11	0.666971	0.999995	0	0	0.951499	0.385365	KLC4
Apoptotic cleavage of cell adhesion proteins Homo sapiens R-HSA-351906	1/11	0.666971	0.999995	0	0	0.951499	0.385365	OCLN
Defects in cobalamin (B12) metabolism Homo sapiens R-HSA-3296469	1/11	0.666971	0.999995	0	0	0.951499	0.385365	MTR
Biotin transport and metabolism Homo sapiens R-HSA-196780	1/11	0.666971	0.999995	0	0	0.951499	0.385365	ACACA
Hormone ligand-binding receptors Homo sapiens R-HSA-375281	1/11	0.666971	0.999995	0	0	0.951499	0.385365	GNRHR2
Toll Like Receptor 10 (TLR10) Cascade Homo sapiens R-HSA-168142	7/82	0.67341	0.999995	0	0	0.887676	0.350988	DUSP4;RPS6KA5;IRAK2;NOD2;RELA;NFKB2;NFKBIB
Toll Like Receptor 5 (TLR5) Cascade Homo sapiens R-HSA-168176	7/82	0.67341	0.999995	0	0	0.887676	0.350988	DUSP4;RPS6KA5;IRAK2;NOD2;RELA;NFKB2;NFKBIB
MyD88 cascade initiated on plasma membrane Homo sapiens R-HSA-975871	7/82	0.67341	0.999995	0	0	0.887676	0.350988	DUSP4;RPS6KA5;IRAK2;NOD2;RELA;NFKB2;NFKBIB
Antigen processing: Ubiquitination & Proteasome degradation Homo sapiens R-HSA-983168	23/260	0.674192	0.999995	0	0	0.922483	0.363681	PSMD12;FBXW8;UBA6;UBA5;MIB2;HUWE1;LTN1;UBR4;CBLB;RNF6;MEX3C;ANAPC10;PJA2;ASB16;UFL1;HERC1;TRIM39;PSMC4;NEDD4;RLIM;FBXO6;LONRF1;ASB1
TNFs bind their physiological receptors Homo sapiens R-HSA-5669034	2/24	0.680108	0.999995	0	0	0.86488	0.333414	TNFRSF14;EDA2R
Phosphorylation of CD3 and TCR zeta chains Homo sapiens R-HSA-202427	2/24	0.680108	0.999995	0	0	0.86488	0.333414	HLA-DPB1;PAG1
Growth hormone receptor signaling Homo sapiens R-HSA-982772	2/24	0.680108	0.999995	0	0	0.86488	0.333414	ADAM17;IRS2
Nuclear Events (kinase and transcription factor activation) Homo sapiens R-HSA-198725	2/24	0.680108	0.999995	0	0	0.86488	0.333414	DUSP4;RPS6KA5
IKK complex recruitment mediated by RIP1 Homo sapiens R-HSA-937041	2/24	0.680108	0.999995	0	0	0.86488	0.333414	LY96;BIRC3
Endogenous sterols Homo sapiens R-HSA-211976	2/24	0.680108	0.999995	0	0	0.86488	0.333414	CYP4V2;CYP1B1
Pyrimidine metabolism Homo sapiens R-HSA-73848	2/24	0.680108	0.999995	0	0	0.86488	0.333414	NT5M;UPP1
TP53 Regulates Transcription of Cell Cycle Genes Homo sapiens R-HSA-6791312	4/48	0.681746	0.999995	0	0	0.864738	0.331279	CNOT6L;CENPJ;CNOT10;E2F7
TRAF6 mediated induction of NFkB and MAP kinases upon TLR7/8 or 9 activation Homo sapiens R-HSA-975138	7/83	0.685824	0.999995	0	0	0.875948	0.33035	DUSP4;RPS6KA5;IRAK2;NOD2;RELA;NFKB2;NFKBIB
Signaling by NOTCH1 Homo sapiens R-HSA-1980143	6/72	0.692131	0.999995	0	0	0.864595	0.318154	HDAC4;JAG2;ADAM17;HEY1;MIB2;HDAC6
Homology Directed Repair Homo sapiens R-HSA-5693538	10/118	0.695367	0.999995	0	0	0.880413	0.319867	MDC1;FEN1;WRN;RAD50;TOP3A;RPA2;ATM;TP53BP1;BRCA2;ATR
Transport of Mature mRNA Derived from an Intronless Transcript Homo sapiens R-HSA-159231	3/37	0.69675	0.999995	0	0	0.839327	0.303273	RANBP2;NDC1;AAAS
Complex I biogenesis Homo sapiens R-HSA-6799198	4/49	0.697526	0.999995	0	0	0.845475	0.304553	ACAD9;NDUFAF2;NDUFS1;NDUFV3
Reversible hydration of carbon dioxide Homo sapiens R-HSA-1475029	1/12	0.698659	0.999995	0	0	0.864951	0.310165	CA13
mRNA decay by 3' to 5' exoribonuclease Homo sapiens R-HSA-429958	1/12	0.698659	0.999995	0	0	0.864951	0.310165	DIS3
TP53 Regulates Transcription of Caspase Activators and Caspases Homo sapiens R-HSA-6803207	1/12	0.698659	0.999995	0	0	0.864951	0.310165	ATM
TP53 Regulates Transcription of Death Receptors and Ligands Homo sapiens R-HSA-6803211	1/12	0.698659	0.999995	0	0	0.864951	0.310165	TNFRSF10A
FGFR3 mutant receptor activation Homo sapiens R-HSA-2033514	1/12	0.698659	0.999995	0	0	0.864951	0.310165	FGF2
Signaling by activated point mutants of FGFR3 Homo sapiens R-HSA-1839130	1/12	0.698659	0.999995	0	0	0.864951	0.310165	FGF2
ERKs are inactivated Homo sapiens R-HSA-202670	1/12	0.698659	0.999995	0	0	0.864951	0.310165	DUSP4
P2Y receptors Homo sapiens R-HSA-417957	1/12	0.698659	0.999995	0	0	0.864951	0.310165	P2RY11
Serotonin receptors Homo sapiens R-HSA-390666	1/12	0.698659	0.999995	0	0	0.864951	0.310165	HTR2B
The NLRP3 inflammasome Homo sapiens R-HSA-844456	1/12	0.698659	0.999995	0	0	0.864951	0.310165	P2RX7
Peptide hormone biosynthesis Homo sapiens R-HSA-209952	1/12	0.698659	0.999995	0	0	0.864951	0.310165	INHBE
Purine ribonucleoside monophosphate biosynthesis Homo sapiens R-HSA-73817	1/12	0.698659	0.999995	0	0	0.864951	0.310165	PPAT
Lysine catabolism Homo sapiens R-HSA-71064	1/12	0.698659	0.999995	0	0	0.864951	0.310165	HYKK
Presynaptic nicotinic acetylcholine receptors Homo sapiens R-HSA-622323	1/12	0.698659	0.999995	0	0	0.864951	0.310165	CHRNE
Amino acid synthesis and interconversion (transamination) Homo sapiens R-HSA-70614	2/25	0.701915	0.999995	0	0	0.827231	0.292792	GOT1;GPT2
G0 and Early G1 Homo sapiens R-HSA-1538133	2/25	0.701915	0.999995	0	0	0.827231	0.292792	E2F5;LIN52
Synthesis of IP3 and IP4 in the cytosol Homo sapiens R-HSA-1855204	2/25	0.701915	0.999995	0	0	0.827231	0.292792	SYNJ1;INPP5J
Acyl chain remodelling of PC Homo sapiens R-HSA-1482788	2/25	0.701915	0.999995	0	0	0.827231	0.292792	PNPLA8;LPCAT1
Signaling by TGF-beta Receptor Complex Homo sapiens R-HSA-170834	6/73	0.704947	0.999995	0	0	0.851644	0.297762	PPP1R15A;CDKN2B;PARD6A;CCNT1;E2F5;UCHL5
MyD88 dependent cascade initiated on endosome Homo sapiens R-HSA-975155	7/85	0.709729	0.999995	0	0	0.853393	0.292604	DUSP4;RPS6KA5;IRAK2;NOD2;RELA;NFKB2;NFKBIB
Toll Like Receptor 7/8 (TLR7/8) Cascade Homo sapiens R-HSA-168181	7/85	0.709729	0.999995	0	0	0.853393	0.292604	DUSP4;RPS6KA5;IRAK2;NOD2;RELA;NFKB2;NFKBIB
Transmembrane transport of small molecules Homo sapiens R-HSA-382551	53/594	0.710232	0.999995	0	0	0.930234	0.318292	SLC46A1;TFRC;ATP8A1;SLC7A11;BEST1;SLC22A15;FTH1;SLC39A8;ATP7A;NDC1;SLC30A7;SLC30A6;ABCC4;ATP6V0B;SLC15A2;SLC30A5;SLC11A2;ANO8;ATP11A;SLC7A8;SLC29A3;FTL;SLC22A5;SLC41A2;ABCB8;AAAS;CLCN3;SLC5A3;ADCY7;SLC17A5;HMOX1;ATP6V0E2;ASIC3;SLC38A5;ATP6V1C1;FGF21;RANBP2;GCKR;SLC35A3;SLC31A1;ATP13A1;ABCA3;CTNS;ABCA7;MCOLN1;CLCN7;CLCN6;SLC4A8;CLCN5;CLCN4;OSTM1;GLRB;WNK1
Deadenylation-dependent mRNA decay Homo sapiens R-HSA-429914	4/50	0.712736	0.999995	0	0	0.827049	0.280075	CNOT6L;DIS3;CNOT10;EDC3
Metabolism of non-coding RNA Homo sapiens R-HSA-194441	4/50	0.712736	0.999995	0	0	0.827049	0.280075	NDC1;RANBP2;PRMT5;AAAS
snRNP Assembly Homo sapiens R-HSA-191859	4/50	0.712736	0.999995	0	0	0.827049	0.280075	NDC1;RANBP2;PRMT5;AAAS
Transport of Mature mRNAs Derived from Intronless Transcripts Homo sapiens R-HSA-159234	3/38	0.714102	0.999995	0	0	0.815301	0.274536	RANBP2;NDC1;AAAS
Signaling by FGFR1 in disease Homo sapiens R-HSA-5655302	3/38	0.714102	0.999995	0	0	0.815301	0.274536	TRIM24;GAB2;FGF2
Major pathway of rRNA processing in the nucleolus Homo sapiens R-HSA-6791226	14/166	0.720607	0.999995	0	0	0.875488	0.286863	WDR36;NOP58;UTP6;PNO1;IMP4;NOC4L;UTP18;WDR43;NOL6;EMG1;PES1;TSR1;DCAF13;PELP1
Cell junction organization Homo sapiens R-HSA-446728	7/86	0.721215	0.999995	0	0	0.842544	0.275358	CLDN3;PARD6A;CLDN15;CLDN12;ANG;CDH15;CLDN1
PD-1 signaling Homo sapiens R-HSA-389948	2/26	0.72247	0.999995	0	0	0.792719	0.257696	CD274;HLA-DPB1
Attenuation phase Homo sapiens R-HSA-3371568	2/26	0.72247	0.999995	0	0	0.792719	0.257696	HSPA1B;DEDD2
PTK6 Regulates RHO GTPases, RAS GTPase and MAP kinases Homo sapiens R-HSA-8849471	2/26	0.72247	0.999995	0	0	0.792719	0.257696	SPRED2;RASAL3
Phase 2 - plateau phase Homo sapiens R-HSA-5576893	2/26	0.72247	0.999995	0	0	0.792719	0.257696	AKAP9;CACNA2D2
Downregulation of TGF-beta receptor signaling Homo sapiens R-HSA-2173788	2/26	0.72247	0.999995	0	0	0.792719	0.257696	PPP1R15A;UCHL5
Facilitative Na+-independent glucose transporters Homo sapiens R-HSA-428790	1/13	0.727334	0.999995	0	0	0.792828	0.252412	FGF21
Cytosolic iron-sulfur cluster assembly Homo sapiens R-HSA-2564830	1/13	0.727334	0.999995	0	0	0.792828	0.252412	NUBP2
Mitotic Telophase/Cytokinesis Homo sapiens R-HSA-68884	1/13	0.727334	0.999995	0	0	0.792828	0.252412	STAG1
WNT5A-dependent internalization of FZD2, FZD5 and ROR2 Homo sapiens R-HSA-5140745	1/13	0.727334	0.999995	0	0	0.792828	0.252412	FZD5
TP53 Regulates Transcription of Genes Involved in G1 Cell Cycle Arrest Homo sapiens R-HSA-6804116	1/13	0.727334	0.999995	0	0	0.792828	0.252412	E2F7
AKT phosphorylates targets in the cytosol Homo sapiens R-HSA-198323	1/13	0.727334	0.999995	0	0	0.792828	0.252412	AKT1S1
IRF3-mediated induction of type I IFN Homo sapiens R-HSA-3270619	1/13	0.727334	0.999995	0	0	0.792828	0.252412	TREX1
POU5F1 (OCT4), SOX2, NANOG activate genes related to proliferation Homo sapiens R-HSA-2892247	1/13	0.727334	0.999995	0	0	0.792828	0.252412	FGF2
NICD traffics to nucleus Homo sapiens R-HSA-157052	1/13	0.727334	0.999995	0	0	0.792828	0.252412	NOTCH4
Notch-HLH transcription pathway Homo sapiens R-HSA-350054	1/13	0.727334	0.999995	0	0	0.792828	0.252412	NOTCH4
p75NTR recruits signalling complexes Homo sapiens R-HSA-209543	1/13	0.727334	0.999995	0	0	0.792828	0.252412	SQSTM1
FGFR2c ligand binding and activation Homo sapiens R-HSA-190375	1/13	0.727334	0.999995	0	0	0.792828	0.252412	FGF2
ERBB2 Activates PTK6 Signaling Homo sapiens R-HSA-8847993	1/13	0.727334	0.999995	0	0	0.792828	0.252412	NRG1
Downregulation of ERBB2:ERBB3 signaling Homo sapiens R-HSA-1358803	1/13	0.727334	0.999995	0	0	0.792828	0.252412	NRG1
TNFR1-induced proapoptotic signaling Homo sapiens R-HSA-5357786	1/13	0.727334	0.999995	0	0	0.792828	0.252412	CYLD
Synthesis, secretion, and inactivation of Glucose-dependent Insulinotropic Polypeptide (GIP) Homo sapiens R-HSA-400511	1/13	0.727334	0.999995	0	0	0.792828	0.252412	SEC11C
Depolarization of the Presynaptic Terminal Triggers the Opening of Calcium Channels Homo sapiens R-HSA-112308	1/13	0.727334	0.999995	0	0	0.792828	0.252412	CACNA2D2
Signaling by Activin Homo sapiens R-HSA-1502540	1/13	0.727334	0.999995	0	0	0.792828	0.252412	ACVR2B
Purine salvage Homo sapiens R-HSA-74217	1/13	0.727334	0.999995	0	0	0.792828	0.252412	ADK
Nuclear Envelope Breakdown Homo sapiens R-HSA-2980766	4/51	0.727377	0.999995	0	0	0.809407	0.257642	NDC1;RANBP2;AAAS;LPIN1
mRNA 3'-end processing Homo sapiens R-HSA-72187	4/51	0.727377	0.999995	0	0	0.809407	0.257642	NUDT21;DDX39A;UPF3B;THOC3
Post-Elongation Processing of Intron-Containing pre-mRNA Homo sapiens R-HSA-112296	4/51	0.727377	0.999995	0	0	0.809407	0.257642	NUDT21;DDX39A;UPF3B;THOC3
Collagen degradation Homo sapiens R-HSA-1442490	3/39	0.730675	0.999995	0	0	0.79261	0.24871	ADAM17;MMP1;MMP15
NS1 Mediated Effects on Host Pathways Homo sapiens R-HSA-168276	3/39	0.730675	0.999995	0	0	0.79261	0.24871	RANBP2;NDC1;AAAS
Nuclear signaling by ERBB4 Homo sapiens R-HSA-1251985	3/39	0.730675	0.999995	0	0	0.79261	0.24871	ADAM17;NRG1;ESR1
Association of TriC/CCT with target proteins during biosynthesis Homo sapiens R-HSA-390471	3/39	0.730675	0.999995	0	0	0.79261	0.24871	ARFGEF2;FBXO6;SKIV2L
GABA B receptor activation Homo sapiens R-HSA-977444	3/39	0.730675	0.999995	0	0	0.79261	0.24871	GNAL;ADCY7;KCNJ2
Activation of GABAB receptors Homo sapiens R-HSA-991365	3/39	0.730675	0.999995	0	0	0.79261	0.24871	GNAL;ADCY7;KCNJ2
Cell Cycle Homo sapiens R-HSA-1640170	50/566	0.731575	0.999995	0	0	0.919915	0.287524	CEP57;MDC1;AHCTF1;FEN1;CCP110;BRCA2;GOLGA2;MIS18BP1;LIN52;NDC1;BORA;CSNK2A1;FKBPL;ESCO1;LIG1;TOP3A;TUBA4A;ESPL1;ZW10;AKAP9;POT1;BLZF1;PSMD12;MAX;AAAS;ANAPC10;WRN;DSN1;ORC6;ORC1;CEP70;CEP192;TP53BP1;E2F5;CEP76;RANBP2;CDKN2B;ODF2;RPA2;MLH1;RAD50;STAG1;PSMC4;CENPJ;ALMS1;TUBGCP5;CENPN;ATM;LPIN1;ATR
Nonhomologous End-Joining (NHEJ) Homo sapiens R-HSA-5693571	4/52	0.741454	0.999995	0	0	0.792501	0.237071	MDC1;RAD50;ATM;TP53BP1
VEGFR2 mediated vascular permeability Homo sapiens R-HSA-5218920	2/27	0.741814	0.999995	0	0	0.760968	0.227268	TRIB3;MTOR
Caspase activation via extrinsic apoptotic signalig pathway Homo sapiens R-HSA-5357769	2/27	0.741814	0.999995	0	0	0.760968	0.227268	LY96;TNFRSF10A
Platelet calcium homeostasis Homo sapiens R-HSA-418360	2/27	0.741814	0.999995	0	0	0.760968	0.227268	P2RX7;P2RX1
RORA activates gene expression Homo sapiens R-HSA-1368082	2/27	0.741814	0.999995	0	0	0.760968	0.227268	SREBF1;PPARA
Synthesis of bile acids and bile salts Homo sapiens R-HSA-192105	2/27	0.741814	0.999995	0	0	0.760968	0.227268	CH25H;AKR1C1
Toll Like Receptor 9 (TLR9) Cascade Homo sapiens R-HSA-168138	7/88	0.743247	0.999995	0	0	0.821649	0.243806	DUSP4;RPS6KA5;IRAK2;NOD2;RELA;NFKB2;NFKBIB
HDR through Homologous Recombination (HR) or Single Strand Annealing (SSA) Homo sapiens R-HSA-5693567	9/112	0.749185	0.999995	0	0	0.830628	0.23986	MDC1;WRN;RAD50;TOP3A;RPA2;ATM;TP53BP1;BRCA2;ATR
Class I MHC mediated antigen processing & presentation Homo sapiens R-HSA-983169	26/305	0.750436	0.999995	0	0	0.885156	0.254129	PSMD12;SAR1B;UBA6;UBA5;LTN1;UBR4;CBLB;RNF6;ANAPC10;ASB16;UFL1;HERC1;FBXO6;LONRF1;SEC24A;FBXW8;HSPA5;MIB2;HUWE1;MEX3C;PJA2;TRIM39;PSMC4;NEDD4;RLIM;ASB1
RNA polymerase II transcribes snRNA genes Homo sapiens R-HSA-6807505	6/77	0.752536	0.999995	0	0	0.803485	0.228436	CCNT1;TAF13;TAF9;NABP2;TAF5;GTF2F1
S Phase Homo sapiens R-HSA-69242	10/124	0.752632	0.999995	0	0	0.833797	0.236947	PSMD12;STAG1;FEN1;ORC6;LIG1;ESCO1;ORC1;MAX;PSMC4;RPA2
SUMOylation of transcription factors Homo sapiens R-HSA-3232118	1/14	0.753281	0.999995	0	0	0.731801	0.207331	TP53BP1
TP53 regulates transcription of several additional cell death genes whose specific roles in p53-dependent apoptosis remain uncertain Homo sapiens R-HSA-6803205	1/14	0.753281	0.999995	0	0	0.731801	0.207331	CHM
FGFR4 ligand binding and activation Homo sapiens R-HSA-190322	1/14	0.753281	0.999995	0	0	0.731801	0.207331	FGF2
TRAF3-dependent IRF activation pathway Homo sapiens R-HSA-918233	1/14	0.753281	0.999995	0	0	0.731801	0.207331	SIKE1
DCC mediated attractive signaling Homo sapiens R-HSA-418885	1/14	0.753281	0.999995	0	0	0.731801	0.207331	ABLIM3
Repression of WNT target genes Homo sapiens R-HSA-4641265	1/14	0.753281	0.999995	0	0	0.731801	0.207331	TCF7
Synthesis of bile acids and bile salts via 24-hydroxycholesterol Homo sapiens R-HSA-193775	1/14	0.753281	0.999995	0	0	0.731801	0.207331	AKR1C1
Synthesis of Prostaglandins (PG) and Thromboxanes (TX) Homo sapiens R-HSA-2162123	1/14	0.753281	0.999995	0	0	0.731801	0.207331	PTGS2
Regulation of pyruvate dehydrogenase (PDH) complex Homo sapiens R-HSA-204174	1/14	0.753281	0.999995	0	0	0.731801	0.207331	PDP2
Activation of Nicotinic Acetylcholine Receptors Homo sapiens R-HSA-629602	1/14	0.753281	0.999995	0	0	0.731801	0.207331	CHRNE
Postsynaptic nicotinic acetylcholine receptors Homo sapiens R-HSA-622327	1/14	0.753281	0.999995	0	0	0.731801	0.207331	CHRNE
Acetylcholine Binding And Downstream Events Homo sapiens R-HSA-181431	1/14	0.753281	0.999995	0	0	0.731801	0.207331	CHRNE
RNA Polymerase III Transcription Initiation From Type 3 Promoter Homo sapiens R-HSA-76071	2/28	0.759991	0.999995	0	0	0.73166	0.200803	BRF2;POLR3E
Endosomal Sorting Complex Required For Transport (ESCRT) Homo sapiens R-HSA-917729	2/28	0.759991	0.999995	0	0	0.73166	0.200803	CHMP4C;STAM
Adrenaline,noradrenaline inhibits insulin secretion Homo sapiens R-HSA-400042	2/28	0.759991	0.999995	0	0	0.73166	0.200803	CACNA2D2;ADRA2C
Synthesis of PA Homo sapiens R-HSA-1483166	2/28	0.759991	0.999995	0	0	0.73166	0.200803	AGPAT5;LPCAT1
Intraflagellar transport Homo sapiens R-HSA-5620924	3/41	0.761538	0.999995	0	0	0.750811	0.204532	DYNC2H1;IFT172;TRIP11
Host Interactions with Influenza Factors Homo sapiens R-HSA-168253	3/41	0.761538	0.999995	0	0	0.750811	0.204532	RANBP2;NDC1;AAAS
Activation of NF-kappaB in B cells Homo sapiens R-HSA-1169091	5/66	0.764488	0.999995	0	0	0.779358	0.209296	PSMD12;PSMC4;REL;RELA;NFKBIB
Cytosolic sensors of pathogen-associated DNA Homo sapiens R-HSA-1834949	5/66	0.764488	0.999995	0	0	0.779358	0.209296	TREX1;POLR3E;RELA;NFKB2;NFKBIB
G2/M Checkpoints Homo sapiens R-HSA-69481	12/150	0.775624	0.999995	0	0	0.826317	0.209956	MDC1;PSMD12;WRN;RAD50;ORC6;ORC1;PSMC4;TOP3A;RPA2;ATM;TP53BP1;ATR
Transcriptional regulation of pluripotent stem cells Homo sapiens R-HSA-452723	3/42	0.77586	0.999995	0	0	0.731519	0.185647	KLF4;FGF2;DKK1
Disorders of transmembrane transporters Homo sapiens R-HSA-5619115	1/15	0.776761	0.999995	0	0	0.679492	0.171655	GCKR
Depolymerisation of the Nuclear Lamina Homo sapiens R-HSA-4419969	1/15	0.776761	0.999995	0	0	0.679492	0.171655	LPIN1
mRNA decay by 5' to 3' exoribonuclease Homo sapiens R-HSA-430039	1/15	0.776761	0.999995	0	0	0.679492	0.171655	EDC3
Activation of BAD and translocation to mitochondria Homo sapiens R-HSA-111447	1/15	0.776761	0.999995	0	0	0.679492	0.171655	BCL2
Regulation of innate immune responses to cytosolic DNA Homo sapiens R-HSA-3134975	1/15	0.776761	0.999995	0	0	0.679492	0.171655	TREX1
Processing of Intronless Pre-mRNAs Homo sapiens R-HSA-77595	1/15	0.776761	0.999995	0	0	0.679492	0.171655	NUDT21
Association of licensing factors with the pre-replicative complex Homo sapiens R-HSA-69298	1/15	0.776761	0.999995	0	0	0.679492	0.171655	ORC1
NRIF signals cell death from the nucleus Homo sapiens R-HSA-205043	1/15	0.776761	0.999995	0	0	0.679492	0.171655	SQSTM1
FGFR1 ligand binding and activation Homo sapiens R-HSA-190242	1/15	0.776761	0.999995	0	0	0.679492	0.171655	FGF2
ERBB2 Regulates Cell Motility Homo sapiens R-HSA-6785631	1/15	0.776761	0.999995	0	0	0.679492	0.171655	NRG1
Negative regulation of TCF-dependent signaling by WNT ligand antagonists Homo sapiens R-HSA-3772470	1/15	0.776761	0.999995	0	0	0.679492	0.171655	DKK1
CREB phosphorylation through the activation of CaMKII Homo sapiens R-HSA-442729	1/15	0.776761	0.999995	0	0	0.679492	0.171655	AKAP9
Synthesis of bile acids and bile salts via 27-hydroxycholesterol Homo sapiens R-HSA-193807	1/15	0.776761	0.999995	0	0	0.679492	0.171655	AKR1C1
Activation of BH3-only proteins Homo sapiens R-HSA-114452	2/29	0.777048	0.999995	0	0	0.704522	0.177718	BCL2L11;BCL2
PIWI-interacting RNA (piRNA) biogenesis Homo sapiens R-HSA-5601884	2/29	0.777048	0.999995	0	0	0.704522	0.177718	TDRKH;PLD6
Negative regulation of FGFR3 signaling Homo sapiens R-HSA-5654732	2/29	0.777048	0.999995	0	0	0.704522	0.177718	SPRY2;FGF2
Hh mutants that don't undergo autocatalytic processing are degraded by ERAD Homo sapiens R-HSA-5362768	4/55	0.780356	0.999995	0	0	0.745759	0.184952	ERLEC1;PSMD12;PSMC4;SYVN1
Ion transport by P-type ATPases Homo sapiens R-HSA-936837	4/55	0.780356	0.999995	0	0	0.745759	0.184952	ATP8A1;ATP13A1;ATP11A;ATP7A
Toll-Like Receptors Cascades Homo sapiens R-HSA-168898	11/140	0.78838	0.999995	0	0	0.81028	0.192665	DUSP4;RPS6KA5;IRAK2;LY96;IRAK3;TLR6;NOD2;RELA;NFKB2;NFKBIB;BIRC3
TP53 Regulates Transcription of Cell Death Genes Homo sapiens R-HSA-5633008	3/43	0.789467	0.999995	0	0	0.713191	0.168596	CHM;TNFRSF10A;ATM
Chemokine receptors bind chemokines Homo sapiens R-HSA-380108	4/56	0.792243	0.999995	0	0	0.731377	0.170328	CXCL8;CXCL2;CCL28;CCR10
RNA Polymerase I Promoter Escape Homo sapiens R-HSA-73772	2/30	0.793033	0.999995	0	0	0.679323	0.157528	POLR1B;TAF1A
MAPK targets/ Nuclear events mediated by MAP kinases Homo sapiens R-HSA-450282	2/30	0.793033	0.999995	0	0	0.679323	0.157528	DUSP4;RPS6KA5
STING mediated induction of host immune responses Homo sapiens R-HSA-1834941	1/16	0.798006	0.999995	0	0	0.634157	0.14309	TREX1
Translesion synthesis by REV1 Homo sapiens R-HSA-110312	1/16	0.798006	0.999995	0	0	0.634157	0.14309	RPA2
TRAF6 mediated induction of TAK1 complex Homo sapiens R-HSA-937072	1/16	0.798006	0.999995	0	0	0.634157	0.14309	LY96
Spry regulation of FGF signaling Homo sapiens R-HSA-1295596	1/16	0.798006	0.999995	0	0	0.634157	0.14309	SPRY2
PI3K events in ERBB2 signaling Homo sapiens R-HSA-1963642	1/16	0.798006	0.999995	0	0	0.634157	0.14309	NRG1
GRB2 events in ERBB2 signaling Homo sapiens R-HSA-1963640	1/16	0.798006	0.999995	0	0	0.634157	0.14309	NRG1
Polo-like kinase mediated events Homo sapiens R-HSA-156711	1/16	0.798006	0.999995	0	0	0.634157	0.14309	LIN52
Regulation of KIT signaling Homo sapiens R-HSA-1433559	1/16	0.798006	0.999995	0	0	0.634157	0.14309	SH2B2
Rap1 signalling Homo sapiens R-HSA-392517	1/16	0.798006	0.999995	0	0	0.634157	0.14309	RAPGEF3
PKA activation Homo sapiens R-HSA-163615	1/16	0.798006	0.999995	0	0	0.634157	0.14309	ADCY7
TGF-beta receptor signaling in EMT (epithelial to mesenchymal transition) Homo sapiens R-HSA-2173791	1/16	0.798006	0.999995	0	0	0.634157	0.14309	PARD6A
Kinesins Homo sapiens R-HSA-983189	3/44	0.802381	0.999995	0	0	0.695758	0.153187	KLC4;KIF16B;KIF27
SUMOylation of DNA replication proteins Homo sapiens R-HSA-4615885	3/44	0.802381	0.999995	0	0	0.695758	0.153187	RANBP2;NDC1;AAAS
Transcriptional activity of SMAD2/SMAD3:SMAD4 heterotrimer Homo sapiens R-HSA-2173793	3/44	0.802381	0.999995	0	0	0.695758	0.153187	CDKN2B;CCNT1;E2F5
Hh mutants abrogate ligand secretion Homo sapiens R-HSA-5387390	4/57	0.803608	0.999995	0	0	0.717538	0.156885	ERLEC1;PSMD12;PSMC4;SYVN1
Cell Cycle, Mitotic Homo sapiens R-HSA-69278	39/462	0.807189	0.999995	0	0	0.874724	0.187363	CEP57;AHCTF1;FEN1;PSMD12;MAX;CCP110;AAAS;ANAPC10;GOLGA2;DSN1;ORC6;ORC1;CEP70;CEP192;E2F5;CEP76;LIN52;NDC1;RANBP2;CDKN2B;BORA;CSNK2A1;FKBPL;ESCO1;LIG1;ODF2;RPA2;TUBA4A;STAG1;ESPL1;PSMC4;CENPJ;ZW10;ALMS1;AKAP9;TUBGCP5;CENPN;LPIN1;BLZF1
Negative regulation of FGFR4 signaling Homo sapiens R-HSA-5654733	2/31	0.807997	0.999995	0	0	0.655862	0.139828	SPRY2;FGF2
Adherens junctions interactions Homo sapiens R-HSA-418990	2/31	0.807997	0.999995	0	0	0.655862	0.139828	ANG;CDH15
Inwardly rectifying K+ channels Homo sapiens R-HSA-1296065	2/31	0.807997	0.999995	0	0	0.655862	0.139828	KCNJ14;KCNJ2
Metabolism of carbohydrates Homo sapiens R-HSA-71387	23/282	0.80985	0.999995	0	0	0.843086	0.177812	NDC1;RANBP2;PFKFB2;GCKR;MDH1;GOT1;GLYCTK;PGAM2;AKR1A1;GXYLT1;PHKA1;AAAS;SLC5A3;BCAN;GALE;GNPDA1;HYAL1;HYAL3;PHKG2;ST3GAL6;B4GALT7;XYLB;FGF21
B-WICH complex positively regulates rRNA expression Homo sapiens R-HSA-5250924	4/58	0.814463	0.999995	0	0	0.704211	0.144523	MYBBP1A;POLR1B;TAF1A;DDX21
Recruitment and ATM-mediated phosphorylation of repair and signaling proteins at DNA double strand breaks Homo sapiens R-HSA-5693565	4/58	0.814463	0.999995	0	0	0.704211	0.144523	MDC1;RAD50;ATM;TP53BP1
CDT1 association with the CDC6:ORC:origin complex Homo sapiens R-HSA-68827	4/58	0.814463	0.999995	0	0	0.704211	0.144523	PSMD12;ORC6;ORC1;PSMC4
Acetylcholine Neurotransmitter Release Cycle Homo sapiens R-HSA-264642	1/17	0.817231	0.999995	0	0	0.59449	0.119988	PPFIA3
TNF receptor superfamily (TNFSF) members mediating non-canonical NF-kB pathway Homo sapiens R-HSA-5676594	1/17	0.817231	0.999995	0	0	0.59449	0.119988	BIRC3
Trafficking of GluR2-containing AMPA receptors Homo sapiens R-HSA-416993	1/17	0.817231	0.999995	0	0	0.59449	0.119988	PICK1
KSRP (KHSRP) binds and destabilizes mRNA Homo sapiens R-HSA-450604	1/17	0.817231	0.999995	0	0	0.59449	0.119988	DIS3
Butyrate Response Factor 1 (BRF1) binds and destabilizes mRNA Homo sapiens R-HSA-450385	1/17	0.817231	0.999995	0	0	0.59449	0.119988	DIS3
Formation of Senescence-Associated Heterochromatin Foci (SAHF) Homo sapiens R-HSA-2559584	1/17	0.817231	0.999995	0	0	0.59449	0.119988	EP400
Translesion synthesis by POLK Homo sapiens R-HSA-5655862	1/17	0.817231	0.999995	0	0	0.59449	0.119988	RPA2
Translesion synthesis by POLI Homo sapiens R-HSA-5656121	1/17	0.817231	0.999995	0	0	0.59449	0.119988	RPA2
G1/S-Specific Transcription Homo sapiens R-HSA-69205	1/17	0.817231	0.999995	0	0	0.59449	0.119988	ORC1
Platelet sensitization by LDL Homo sapiens R-HSA-432142	1/17	0.817231	0.999995	0	0	0.59449	0.119988	LRP8
Activated point mutants of FGFR2 Homo sapiens R-HSA-2033519	1/17	0.817231	0.999995	0	0	0.59449	0.119988	FGF2
Ras activation uopn Ca2+ infux through NMDA receptor Homo sapiens R-HSA-442982	1/17	0.817231	0.999995	0	0	0.59449	0.119988	AKAP9
Unblocking of NMDA receptor, glutamate binding and activation Homo sapiens R-HSA-438066	1/17	0.817231	0.999995	0	0	0.59449	0.119988	AKAP9
PKA-mediated phosphorylation of CREB Homo sapiens R-HSA-111931	1/17	0.817231	0.999995	0	0	0.59449	0.119988	ADCY7
PKA activation in glucagon signalling Homo sapiens R-HSA-164378	1/17	0.817231	0.999995	0	0	0.59449	0.119988	ADCY7
Digestion of dietary lipid Homo sapiens R-HSA-192456	1/17	0.817231	0.999995	0	0	0.59449	0.119988	LMF2
Acyl chain remodelling of PG Homo sapiens R-HSA-1482925	1/17	0.817231	0.999995	0	0	0.59449	0.119988	LPCAT1
Mitochondrial Fatty Acid Beta-Oxidation Homo sapiens R-HSA-77289	1/17	0.817231	0.999995	0	0	0.59449	0.119988	MCEE
Metabolism of polyamines Homo sapiens R-HSA-351202	6/84	0.821861	0.999995	0	0	0.731094	0.143428	ARG2;PSMD12;GOT1;PSMC4;ASS1;AGMAT
RNA Polymerase I Transcription Termination Homo sapiens R-HSA-73863	2/32	0.821987	0.999995	0	0	0.633965	0.124276	POLR1B;TAF1A
Signaling by NOTCH2 Homo sapiens R-HSA-1980145	2/32	0.821987	0.999995	0	0	0.633965	0.124276	JAG2;MIB2
Oncogene Induced Senescence Homo sapiens R-HSA-2559585	2/32	0.821987	0.999995	0	0	0.633965	0.124276	CDKN2B;AGO3
Glycolysis Homo sapiens R-HSA-70171	2/32	0.821987	0.999995	0	0	0.633965	0.124276	PFKFB2;PGAM2
Negative regulation of FGFR1 signaling Homo sapiens R-HSA-5654726	2/32	0.821987	0.999995	0	0	0.633965	0.124276	SPRY2;FGF2
TGF-beta receptor signaling activates SMADs Homo sapiens R-HSA-2173789	2/32	0.821987	0.999995	0	0	0.633965	0.124276	PPP1R15A;UCHL5
DNA Damage/Telomere Stress Induced Senescence Homo sapiens R-HSA-2559586	4/59	0.82482	0.999995	0	0	0.691369	0.133151	RAD50;EP400;POT1;ATM
Telomere Maintenance Homo sapiens R-HSA-157579	4/59	0.82482	0.999995	0	0	0.691369	0.133151	FEN1;LIG1;POT1;RPA2
DNA Double Strand Break Response Homo sapiens R-HSA-5693606	4/59	0.82482	0.999995	0	0	0.691369	0.133151	MDC1;RAD50;ATM;TP53BP1
Costimulation by the CD28 family Homo sapiens R-HSA-388841	5/72	0.826769	0.999995	0	0	0.709329	0.134936	CD274;HLA-DPB1;TRIB3;TNFRSF14;MTOR
Synthesis of DNA Homo sapiens R-HSA-69239	7/97	0.827029	0.999995	0	0	0.739115	0.14037	PSMD12;FEN1;ORC6;LIG1;ORC1;PSMC4;RPA2
Signaling by NOTCH Homo sapiens R-HSA-157118	9/122	0.831225	0.999995	0	0	0.7567	0.13988	JAG2;HDAC4;ADAM17;AGO3;HEY1;NOTCH4;MIB2;ST3GAL6;HDAC6
Miscellaneous transport and binding events Homo sapiens R-HSA-5223345	1/18	0.834627	0.999995	0	0	0.559489	0.101139	CTNS
Serotonin Neurotransmitter Release Cycle Homo sapiens R-HSA-181429	1/18	0.834627	0.999995	0	0	0.559489	0.101139	PPFIA3
Norepinephrine Neurotransmitter Release Cycle Homo sapiens R-HSA-181430	1/18	0.834627	0.999995	0	0	0.559489	0.101139	PPFIA3
Defective GALNT12 causes colorectal cancer 1 (CRCS1) Homo sapiens R-HSA-5083636	1/18	0.834627	0.999995	0	0	0.559489	0.101139	MUC20
Defective GALNT3 causes familial hyperphosphatemic tumoral calcinosis (HFTC) Homo sapiens R-HSA-5083625	1/18	0.834627	0.999995	0	0	0.559489	0.101139	MUC20
Activation of SMO Homo sapiens R-HSA-5635838	1/18	0.834627	0.999995	0	0	0.559489	0.101139	CDON
RNA Polymerase III Chain Elongation Homo sapiens R-HSA-73780	1/18	0.834627	0.999995	0	0	0.559489	0.101139	POLR3E
SHC-mediated cascade:FGFR3 Homo sapiens R-HSA-5654704	1/18	0.834627	0.999995	0	0	0.559489	0.101139	FGF2
SHC1 events in ERBB2 signaling Homo sapiens R-HSA-1250196	1/18	0.834627	0.999995	0	0	0.559489	0.101139	NRG1
Activation of IRF3/IRF7 mediated by TBK1/IKK epsilon Homo sapiens R-HSA-936964	1/18	0.834627	0.999995	0	0	0.559489	0.101139	LY96
Amine-derived hormones Homo sapiens R-HSA-209776	1/18	0.834627	0.999995	0	0	0.559489	0.101139	TH
Translocation of GLUT4 to the plasma membrane Homo sapiens R-HSA-1445148	4/60	0.834693	0.999995	0	0	0.678985	0.122687	RALA;MYH15;EXOC6;PRKAB1
Cleavage of Growing Transcript in the Termination Region Homo sapiens R-HSA-109688	4/60	0.834693	0.999995	0	0	0.678985	0.122687	NUDT21;DDX39A;UPF3B;THOC3
RNA Polymerase II Transcription Termination Homo sapiens R-HSA-73856	4/60	0.834693	0.999995	0	0	0.678985	0.122687	NUDT21;DDX39A;UPF3B;THOC3
Post-Elongation Processing of the Transcript Homo sapiens R-HSA-76044	4/60	0.834693	0.999995	0	0	0.678985	0.122687	NUDT21;DDX39A;UPF3B;THOC3
MAP kinase activation in TLR cascade Homo sapiens R-HSA-450294	4/60	0.834693	0.999995	0	0	0.678985	0.122687	DUSP4;RPS6KA5;IRAK2;NOD2
Sphingolipid de novo biosynthesis Homo sapiens R-HSA-1660661	2/33	0.835055	0.999995	0	0	0.61348	0.110584	OSBP;KDSR
CD28 co-stimulation Homo sapiens R-HSA-389356	2/33	0.835055	0.999995	0	0	0.61348	0.110584	TRIB3;MTOR
E2F mediated regulation of DNA replication Homo sapiens R-HSA-113510	2/33	0.835055	0.999995	0	0	0.61348	0.110584	ORC6;ORC1
FGFR2 mutant receptor activation Homo sapiens R-HSA-1839126	2/33	0.835055	0.999995	0	0	0.61348	0.110584	GTF2F1;FGF2
NOTCH1 Intracellular Domain Regulates Transcription Homo sapiens R-HSA-2122947	3/47	0.837177	0.999995	0	0	0.648212	0.1152	HDAC4;HEY1;HDAC6
Chromosome Maintenance Homo sapiens R-HSA-73886	6/86	0.838565	0.999995	0	0	0.712737	0.125487	FEN1;LIG1;MIS18BP1;POT1;RPA2;CENPN
PI3K/AKT Signaling in Cancer Homo sapiens R-HSA-2219528	6/86	0.838565	0.999995	0	0	0.712737	0.125487	AKT1S1;IRS2;NRG1;FOXO4;FGF2;MTOR
Transport of inorganic cations/anions and amino acids/oligopeptides Homo sapiens R-HSA-425393	7/99	0.842375	0.999995	0	0	0.722967	0.124011	SLC4A8;SLC15A2;SLC7A8;SLC17A5;CTNS;SLC7A11;SLC38A5
Hedgehog 'off' state Homo sapiens R-HSA-5610787	7/99	0.842375	0.999995	0	0	0.722967	0.124011	DYNC2H1;PSMD12;PSMC4;IFT172;TULP3;RPGRIP1L;ADCY7
Dectin-1 mediated noncanonical NF-kB signaling Homo sapiens R-HSA-5607761	4/61	0.844097	0.999995	0	0	0.667036	0.113055	PSMD12;PSMC4;RELA;NFKB2
Activated PKN1 stimulates transcription of AR (androgen receptor) regulated genes KLK2 and KLK3 Homo sapiens R-HSA-5625886	2/34	0.847249	0.999995	0	0	0.594276	0.0985075	AR;KDM4C
Negative regulation of FGFR2 signaling Homo sapiens R-HSA-5654727	2/34	0.847249	0.999995	0	0	0.594276	0.0985075	SPRY2;FGF2
Purine metabolism Homo sapiens R-HSA-73847	2/34	0.847249	0.999995	0	0	0.594276	0.0985075	PPAT;ADK
Pyruvate metabolism and Citric Acid (TCA) cycle Homo sapiens R-HSA-71406	3/48	0.847539	0.999995	0	0	0.633772	0.104838	PDP2;MPC1;HAGH
Cellular Senescence Homo sapiens R-HSA-2559583	12/161	0.849022	0.999995	0	0	0.764845	0.125182	KDM6B;CDKN2B;RAD50;CXCL8;AGO3;EP400;POT1;ATM;TNIK;PHC3;ANAPC10;RELA
Defective B3GALT6 causes EDSP2 and SEMDJL1 Homo sapiens R-HSA-4420332	1/19	0.850368	0.999995	0	0	0.528377	0.0856425	BCAN
Defective B4GALT7 causes EDS, progeroid type Homo sapiens R-HSA-3560783	1/19	0.850368	0.999995	0	0	0.528377	0.0856425	BCAN
Defective B3GAT3 causes JDSSDHD Homo sapiens R-HSA-3560801	1/19	0.850368	0.999995	0	0	0.528377	0.0856425	BCAN
TP53 Regulates Transcription of Genes Involved in Cytochrome C Release Homo sapiens R-HSA-6803204	1/19	0.850368	0.999995	0	0	0.528377	0.0856425	ATM
Translesion Synthesis by POLH Homo sapiens R-HSA-110320	1/19	0.850368	0.999995	0	0	0.528377	0.0856425	RPA2
Phosphorylation of the APC/C Homo sapiens R-HSA-176412	1/19	0.850368	0.999995	0	0	0.528377	0.0856425	ANAPC10
Conversion from APC/C:Cdc20 to APC/C:Cdh1 in late anaphase Homo sapiens R-HSA-176407	1/19	0.850368	0.999995	0	0	0.528377	0.0856425	ANAPC10
Other semaphorin interactions Homo sapiens R-HSA-416700	1/19	0.850368	0.999995	0	0	0.528377	0.0856425	PLXNB3
Signaling by NODAL Homo sapiens R-HSA-1181150	1/19	0.850368	0.999995	0	0	0.528377	0.0856425	ACVR2B
GAB1 signalosome Homo sapiens R-HSA-180292	9/125	0.851304	0.999995	0	0	0.737007	0.118648	AGO3;AKT1S1;IRS2;TRIB3;NRG1;FOXO4;FGF2;PAG1;MTOR
Cytochrome P450 - arranged by substrate type Homo sapiens R-HSA-211897	4/62	0.853046	0.999995	0	0	0.655499	0.104186	CYP27B1;CYP4V2;CYP2R1;CYP1B1
Gene Silencing by RNA Homo sapiens R-HSA-211000	7/101	0.856611	0.999995	0	0	0.707506	0.109502	TDRKH;NDC1;RANBP2;AGO3;PLD6;AAAS;TSN
HIV Infection Homo sapiens R-HSA-162906	17/222	0.856972	0.999995	0	0	0.787167	0.121499	NDC1;RANBP2;FEN1;PSMD12;CCNT1;LIG1;RNMT;TAF13;TAF9;AAAS;GTF2F1;SUPT5H;PSMC4;CHMP4C;TAF4B;TAF5;NELFE
Lysosome Vesicle Biogenesis Homo sapiens R-HSA-432720	2/35	0.858617	0.999995	0	0	0.576236	0.0878369	DNAJC6;AP4B1
Generation of second messenger molecules Homo sapiens R-HSA-202433	2/35	0.858617	0.999995	0	0	0.576236	0.0878369	HLA-DPB1;LAT
Regulation of TP53 Degradation Homo sapiens R-HSA-6804757	2/35	0.858617	0.999995	0	0	0.576236	0.0878369	ATM;MTOR
Post NMDA receptor activation events Homo sapiens R-HSA-438064	2/35	0.858617	0.999995	0	0	0.576236	0.0878369	AKAP9;CAMKK1
Bile acid and bile salt metabolism Homo sapiens R-HSA-194068	2/35	0.858617	0.999995	0	0	0.576236	0.0878369	CH25H;AKR1C1
Collagen biosynthesis and modifying enzymes Homo sapiens R-HSA-1650814	4/63	0.861554	0.999995	0	0	0.644354	0.0960197	COL4A4;COL4A3;COL10A1;P4HB
Signaling by FGFR in disease Homo sapiens R-HSA-1226099	4/63	0.861554	0.999995	0	0	0.644354	0.0960197	TRIM24;GAB2;GTF2F1;FGF2
Asymmetric localization of PCP proteins Homo sapiens R-HSA-4608870	4/63	0.861554	0.999995	0	0	0.644354	0.0960197	PSMD12;PARD6A;FZD5;PSMC4
Chondroitin sulfate biosynthesis Homo sapiens R-HSA-2022870	1/20	0.864612	0.999995	0	0	0.50054	0.072816	BCAN
Syndecan interactions Homo sapiens R-HSA-3000170	1/20	0.864612	0.999995	0	0	0.50054	0.072816	FGF2
IL-6-type cytokine receptor ligand interactions Homo sapiens R-HSA-6788467	1/20	0.864612	0.999995	0	0	0.50054	0.072816	LIF
Inhibition of the proteolytic activity of APC/C required for the onset of anaphase by mitotic spindle checkpoint components Homo sapiens R-HSA-141405	1/20	0.864612	0.999995	0	0	0.50054	0.072816	ANAPC10
Inactivation of APC/C via direct inhibition of the APC/C complex Homo sapiens R-HSA-141430	1/20	0.864612	0.999995	0	0	0.50054	0.072816	ANAPC10
Synthesis, secretion, and inactivation of Glucagon-like Peptide-1 (GLP-1) Homo sapiens R-HSA-381771	1/20	0.864612	0.999995	0	0	0.50054	0.072816	SEC11C
eNOS activation and regulation Homo sapiens R-HSA-203765	1/20	0.864612	0.999995	0	0	0.50054	0.072816	NOSTRIN
Metabolism of nitric oxide Homo sapiens R-HSA-202131	1/20	0.864612	0.999995	0	0	0.50054	0.072816	NOSTRIN
RNA Polymerase III Transcription Initiation Homo sapiens R-HSA-76046	2/36	0.869206	0.999995	0	0	0.559257	0.0783941	BRF2;POLR3E
Regulation of TP53 Expression and Degradation Homo sapiens R-HSA-6806003	2/36	0.869206	0.999995	0	0	0.559257	0.0783941	ATM;MTOR
Autodegradation of the E3 ubiquitin ligase COP1 Homo sapiens R-HSA-349425	3/51	0.87525	0.999995	0	0	0.594063	0.0791566	PSMD12;PSMC4;ATM
Translocation of ZAP-70 to Immunological synapse Homo sapiens R-HSA-202430	1/21	0.8775	0.999995	0	0	0.475487	0.062136	HLA-DPB1
Signal transduction by L1 Homo sapiens R-HSA-445144	1/21	0.8775	0.999995	0	0	0.475487	0.062136	CSNK2A1
SHC-mediated cascade:FGFR1 Homo sapiens R-HSA-5654688	1/21	0.8775	0.999995	0	0	0.475487	0.062136	FGF2
Mitotic Spindle Checkpoint Homo sapiens R-HSA-69618	1/21	0.8775	0.999995	0	0	0.475487	0.062136	ANAPC10
Regulation of FZD by ubiquitination Homo sapiens R-HSA-4641263	1/21	0.8775	0.999995	0	0	0.475487	0.062136	FZD5
Cobalamin (Cbl, vitamin B12) transport and metabolism Homo sapiens R-HSA-196741	1/21	0.8775	0.999995	0	0	0.475487	0.062136	MTR
Synthesis of Leukotrienes (LT) and Eoxins (EX) Homo sapiens R-HSA-2142691	1/21	0.8775	0.999995	0	0	0.475487	0.062136	GGT1
Platelet Aggregation (Plug Formation) Homo sapiens R-HSA-76009	2/37	0.87906	0.999995	0	0	0.543248	0.0700257	ADRA2C;RAPGEF3
Steroid hormones Homo sapiens R-HSA-209943	2/37	0.87906	0.999995	0	0	0.543248	0.0700257	CYP27B1;CYP2R1
RIG-I/MDA5 mediated induction of IFN-alpha/beta pathways Homo sapiens R-HSA-168928	5/79	0.881786	0.999995	0	0	0.641981	0.0807646	CYLD;SIKE1;RELA;NFKB2;NFKBIB
DNA Replication Homo sapiens R-HSA-69306	7/105	0.881941	0.999995	0	0	0.678477	0.085237	PSMD12;FEN1;ORC6;LIG1;ORC1;PSMC4;RPA2
p53-Independent DNA Damage Response Homo sapiens R-HSA-69610	3/52	0.883441	0.999995	0	0	0.581907	0.0721161	PSMD12;PSMC4;ATM
p53-Independent G1/S DNA damage checkpoint Homo sapiens R-HSA-69613	3/52	0.883441	0.999995	0	0	0.581907	0.0721161	PSMD12;PSMC4;ATM
Ubiquitin Mediated Degradation of Phosphorylated Cdc25A Homo sapiens R-HSA-69601	3/52	0.883441	0.999995	0	0	0.581907	0.0721161	PSMD12;PSMC4;ATM
Signaling by Insulin receptor Homo sapiens R-HSA-74752	24/311	0.884184	0.999995	0	0	0.793089	0.0976215	DUSP4;ATP6V0B;PSMD12;PSPN;IRS2;TSC1;CSF2RB;NRG1;RASAL3;PRKAB1;DUSP9;FGF2;MTOR;SPRED2;RRAGC;PSMC4;RRAGD;AKAP9;AKT1S1;TRIB3;ATP6V0E2;LAMTOR3;ATP6V1C1;LAT
Gene Expression Homo sapiens R-HSA-74160	142/1631	0.885552	0.999995	0	0	0.899963	0.109385	ZNF331;TDRKH;ZNF573;MDC1;CCNT1;THUMPD1;EDC3;ZFP36;ZNF605;ZNF568;ZNF566;ZNF202;ZNF565;ZFP37;ZNF560;CSNK2A1;METTL1;PUS1;ZFP69B;ZNF10;CDKAL1;THOC3;IMP4;TSC1;POLRMT;GTF2F1;PRKAB1;AR;DDX39A;ZNF717;RRAGC;RRAGD;ZNF557;ZNF432;ZNF398;ZNF550;ZNF791;ZNF274;PSMD12;NOTCH4;PLD6;AAAS;EMG1;PRDX5;MED31;GAR1;ZNF785;ZNF664;ZNF141;ZNF140;PNO1;UPF3B;CNOT10;TNFRSF10A;SUPT5H;ESR1;NR4A2;NR4A3;AGO3;ZNF417;JMY;NABP2;ZNF65…
Diseases of signal transduction Homo sapiens R-HSA-5663202	22/288	0.885914	0.999995	0	0	0.784482	0.0950288	JAG2;HDAC4;PSMD12;FZD5;TNKS;SYVN1;MIB2;IRS2;NRG1;GAB2;FOXO4;GTF2F1;DKK1;FGF2;HDAC6;MTOR;ERLEC1;ADAM17;HEY1;PSMC4;AKT1S1;TRIM24
Transport of vitamins, nucleosides, and related molecules Homo sapiens R-HSA-425397	2/38	0.888225	0.999995	0	0	0.528129	0.0625995	SLC35A3;SLC29A3
G1 Phase Homo sapiens R-HSA-69236	2/38	0.888225	0.999995	0	0	0.528129	0.0625995	CDKN2B;E2F5
Cyclin D associated events in G1 Homo sapiens R-HSA-69231	2/38	0.888225	0.999995	0	0	0.528129	0.0625995	CDKN2B;E2F5
RA biosynthesis pathway Homo sapiens R-HSA-5365859	1/22	0.889162	0.999995	0	0	0.452819	0.0531956	RDH11
Common Pathway of Fibrin Clot Formation Homo sapiens R-HSA-140875	1/22	0.889162	0.999995	0	0	0.452819	0.0531956	PROS1
Intrinsic Pathway of Fibrin Clot Formation Homo sapiens R-HSA-140837	1/22	0.889162	0.999995	0	0	0.452819	0.0531956	F12
Signaling by FGFR3 point mutants in cancer Homo sapiens R-HSA-8853338	1/22	0.889162	0.999995	0	0	0.452819	0.0531956	FGF2
Signaling by FGFR3 in disease Homo sapiens R-HSA-5655332	1/22	0.889162	0.999995	0	0	0.452819	0.0531956	FGF2
Post-chaperonin tubulin folding pathway Homo sapiens R-HSA-389977	1/22	0.889162	0.999995	0	0	0.452819	0.0531956	TUBA4A
GPVI-mediated activation cascade Homo sapiens R-HSA-114604	3/53	0.891149	0.999995	0	0	0.570237	0.065716	CSF2RB;GAB2;LAT
Arachidonic acid metabolism Homo sapiens R-HSA-2142753	3/53	0.891149	0.999995	0	0	0.570237	0.065716	CYP1B1;GGT1;PTGS2
Integrin cell surface interactions Homo sapiens R-HSA-216083	4/67	0.89149	0.999995	0	0	0.603308	0.0692967	COL4A4;COL4A3;ICAM2;ICAM3
Regulation of RAS by GAPs Homo sapiens R-HSA-5658442	4/67	0.89149	0.999995	0	0	0.603308	0.0692967	SPRED2;PSMD12;PSMC4;RASAL3
Assembly of the pre-replicative complex Homo sapiens R-HSA-68867	4/67	0.89149	0.999995	0	0	0.603308	0.0692967	PSMD12;ORC6;ORC1;PSMC4
Cell Cycle Checkpoints Homo sapiens R-HSA-69620	13/182	0.892788	0.999995	0	0	0.730097	0.0827979	MDC1;PSMD12;TOP3A;RPA2;ANAPC10;WRN;RAD50;ORC6;ORC1;PSMC4;ATM;TP53BP1;ATR
DNA Double-Strand Break Repair Homo sapiens R-HSA-5693532	10/145	0.893032	0.999995	0	0	0.703273	0.0795629	MDC1;FEN1;WRN;RAD50;TOP3A;RPA2;ATM;TP53BP1;BRCA2;ATR
Mitotic Prometaphase Homo sapiens R-HSA-68877	7/107	0.893137	0.999995	0	0	0.664834	0.0751366	RANBP2;DSN1;STAG1;AHCTF1;CSNK2A1;ZW10;CENPN
Formation of Fibrin Clot (Clotting Cascade) Homo sapiens R-HSA-140877	2/39	0.896741	0.999995	0	0	0.513826	0.0560012	PROS1;F12
Dual Incision in GG-NER Homo sapiens R-HSA-5696400	2/39	0.896741	0.999995	0	0	0.513826	0.0560012	RPA2;ERCC5
Activation of NMDA receptor upon glutamate binding and postsynaptic events Homo sapiens R-HSA-442755	2/39	0.896741	0.999995	0	0	0.513826	0.0560012	AKAP9;CAMKK1
Heparan sulfate/heparin (HS-GAG) metabolism Homo sapiens R-HSA-1638091	3/54	0.898397	0.999995	0	0	0.559025	0.0598956	BCAN;GXYLT1;B4GALT7
Assembly of collagen fibrils and other multimeric structures Homo sapiens R-HSA-2022090	3/54	0.898397	0.999995	0	0	0.559025	0.0598956	COL4A4;COL4A3;COL10A1
Stabilization of p53 Homo sapiens R-HSA-69541	3/54	0.898397	0.999995	0	0	0.559025	0.0598956	PSMD12;PSMC4;ATM
Degradation of AXIN Homo sapiens R-HSA-4641257	3/54	0.898397	0.999995	0	0	0.559025	0.0598956	PSMD12;TNKS;PSMC4
TNFR2 non-canonical NF-kB pathway Homo sapiens R-HSA-5668541	6/95	0.898669	0.999995	0	0	0.640343	0.0684145	PSMD12;PSMC4;TNFRSF14;EDA2R;BIRC3;NFKB2
Laminin interactions Homo sapiens R-HSA-3000157	1/23	0.899714	0.999995	0	0	0.432213	0.0456757	LAMA1
RNA Polymerase III Transcription Termination Homo sapiens R-HSA-73980	1/23	0.899714	0.999995	0	0	0.432213	0.0456757	POLR3E
MicroRNA (miRNA) biogenesis Homo sapiens R-HSA-203927	1/23	0.899714	0.999995	0	0	0.432213	0.0456757	AGO3
SHC-mediated cascade:FGFR4 Homo sapiens R-HSA-5654719	1/23	0.899714	0.999995	0	0	0.432213	0.0456757	FGF2
APC/C:Cdc20 mediated degradation of Cyclin B Homo sapiens R-HSA-174048	1/23	0.899714	0.999995	0	0	0.432213	0.0456757	ANAPC10
Incretin synthesis, secretion, and inactivation Homo sapiens R-HSA-400508	1/23	0.899714	0.999995	0	0	0.432213	0.0456757	SEC11C
Acyl chain remodelling of PE Homo sapiens R-HSA-1482839	1/23	0.899714	0.999995	0	0	0.432213	0.0456757	PNPLA8
DNA Replication Pre-Initiation Homo sapiens R-HSA-69002	5/82	0.900351	0.999995	0	0	0.616866	0.0647526	PSMD12;ORC6;ORC1;PSMC4;RPA2
M/G1 Transition Homo sapiens R-HSA-68874	5/82	0.900351	0.999995	0	0	0.616866	0.0647526	PSMD12;ORC6;ORC1;PSMC4;RPA2
PI-3K cascade:FGFR1 Homo sapiens R-HSA-5654689	8/122	0.903802	0.999995	0	0	0.666333	0.0673965	AGO3;AKT1S1;IRS2;TRIB3;NRG1;FOXO4;FGF2;MTOR
PI-3K cascade:FGFR3 Homo sapiens R-HSA-5654710	8/122	0.903802	0.999995	0	0	0.666333	0.0673965	AGO3;AKT1S1;IRS2;TRIB3;NRG1;FOXO4;FGF2;MTOR
PI3K events in ERBB4 signaling Homo sapiens R-HSA-1250342	8/122	0.903802	0.999995	0	0	0.666333	0.0673965	AGO3;AKT1S1;IRS2;TRIB3;NRG1;FOXO4;FGF2;MTOR
PIP3 activates AKT signaling Homo sapiens R-HSA-1257604	8/122	0.903802	0.999995	0	0	0.666333	0.0673965	AGO3;AKT1S1;IRS2;TRIB3;NRG1;FOXO4;FGF2;MTOR
PI-3K cascade:FGFR4 Homo sapiens R-HSA-5654720	8/122	0.903802	0.999995	0	0	0.666333	0.0673965	AGO3;AKT1S1;IRS2;TRIB3;NRG1;FOXO4;FGF2;MTOR
PI-3K cascade:FGFR2 Homo sapiens R-HSA-5654695	8/122	0.903802	0.999995	0	0	0.666333	0.0673965	AGO3;AKT1S1;IRS2;TRIB3;NRG1;FOXO4;FGF2;MTOR
L1CAM interactions Homo sapiens R-HSA-373760	6/96	0.903985	0.999995	0	0	0.633193	0.0639159	RPS6KA5;CSNK2A1;LAMA1;NRCAM;ANK2;SCN3B
Negative regulation of MAPK pathway Homo sapiens R-HSA-5675221	2/40	0.904649	0.999995	0	0	0.500277	0.0501319	DUSP4;DUSP9
ECM proteoglycans Homo sapiens R-HSA-3000178	3/55	0.905207	0.999995	0	0	0.548244	0.0546004	BCAN;LAMA1;MATN1
GABA receptor activation Homo sapiens R-HSA-977443	3/55	0.905207	0.999995	0	0	0.548244	0.0546004	GNAL;ADCY7;KCNJ2
p75 NTR receptor-mediated signalling Homo sapiens R-HSA-193704	5/83	0.90595	0.999995	0	0	0.608924	0.060144	ADAM17;BCL2L11;ARHGEF1;SQSTM1;RELA
O-linked glycosylation Homo sapiens R-HSA-5173105	7/110	0.90824	0.999995	0	0	0.645362	0.0621137	GALNT12;POMT2;GALNT3;B3GNT5;C1GALT1;GCNT3;MUC20
Mitotic G1-G1/S phases Homo sapiens R-HSA-453279	9/136	0.909155	0.999995	0	0	0.67276	0.0640734	PSMD12;CDKN2B;ORC6;ORC1;MAX;PSMC4;RPA2;E2F5;LIN52
Glutamate Neurotransmitter Release Cycle Homo sapiens R-HSA-210500	1/24	0.909262	0.999995	0	0	0.413398	0.0393234	PPFIA3
Post-Elongation Processing of Intronless pre-mRNA Homo sapiens R-HSA-112297	1/24	0.909262	0.999995	0	0	0.413398	0.0393234	NUDT21
Processing of Capped Intronless Pre-mRNA Homo sapiens R-HSA-75067	1/24	0.909262	0.999995	0	0	0.413398	0.0393234	NUDT21
DARPP-32 events Homo sapiens R-HSA-180024	1/24	0.909262	0.999995	0	0	0.413398	0.0393234	PDE4D
Synthesis of bile acids and bile salts via 7alpha-hydroxycholesterol Homo sapiens R-HSA-193368	1/24	0.909262	0.999995	0	0	0.413398	0.0393234	AKR1C1
Cytosolic tRNA aminoacylation Homo sapiens R-HSA-379716	1/24	0.909262	0.999995	0	0	0.413398	0.0393234	FARSA
Switching of origins to a post-replicative state Homo sapiens R-HSA-69052	4/70	0.910062	0.999995	0	0	0.57579	0.054264	PSMD12;ORC6;ORC1;PSMC4
Orc1 removal from chromatin Homo sapiens R-HSA-68949	4/70	0.910062	0.999995	0	0	0.57579	0.054264	PSMD12;ORC6;ORC1;PSMC4
IRS-mediated signalling Homo sapiens R-HSA-112399	21/284	0.911517	0.999995	0	0	0.757091	0.0701409	DUSP4;PSMD12;PSPN;IRS2;TSC1;CSF2RB;NRG1;RASAL3;PRKAB1;DUSP9;FGF2;MTOR;SPRED2;RRAGC;PSMC4;RRAGD;AKAP9;AKT1S1;TRIB3;LAMTOR3;LAT
Glycosphingolipid metabolism Homo sapiens R-HSA-1660662	2/41	0.911988	0.999995	0	0	0.487422	0.0449054	ASAH2;NEU1
RNA Polymerase III Abortive And Retractive Initiation Homo sapiens R-HSA-749476	2/41	0.911988	0.999995	0	0	0.487422	0.0449054	BRF2;POLR3E
RNA Polymerase III Transcription Homo sapiens R-HSA-74158	2/41	0.911988	0.999995	0	0	0.487422	0.0449054	BRF2;POLR3E
Pre-NOTCH Transcription and Translation Homo sapiens R-HSA-1912408	2/41	0.911988	0.999995	0	0	0.487422	0.0449054	AGO3;NOTCH4
PI3K/AKT activation Homo sapiens R-HSA-198203	8/125	0.916953	0.999995	0	0	0.649139	0.0562799	AGO3;AKT1S1;IRS2;TRIB3;NRG1;FOXO4;FGF2;MTOR
tRNA processing in the nucleus Homo sapiens R-HSA-6784531	3/57	0.917601	0.999995	0	0	0.52788	0.0453938	NDC1;RANBP2;AAAS
Meiotic synapsis Homo sapiens R-HSA-1221632	3/57	0.917601	0.999995	0	0	0.52788	0.0453938	STAG1;POT1;ATR
Pre-NOTCH Expression and Processing Homo sapiens R-HSA-1912422	3/57	0.917601	0.999995	0	0	0.52788	0.0453938	AGO3;NOTCH4;ST3GAL6
Budding and maturation of HIV virion Homo sapiens R-HSA-162588	1/25	0.917901	0.999995	0	0	0.396151	0.0339365	CHMP4C
APC-Cdc20 mediated degradation of Nek2A Homo sapiens R-HSA-179409	1/25	0.917901	0.999995	0	0	0.396151	0.0339365	ANAPC10
Formation of tubulin folding intermediates by CCT/TriC Homo sapiens R-HSA-389960	1/25	0.917901	0.999995	0	0	0.396151	0.0339365	TUBA4A
Activation of G protein gated Potassium channels Homo sapiens R-HSA-1296041	1/25	0.917901	0.999995	0	0	0.396151	0.0339365	KCNJ2
Inhibition of voltage gated Ca2+ channels via Gbeta/gamma subunits Homo sapiens R-HSA-997272	1/25	0.917901	0.999995	0	0	0.396151	0.0339365	KCNJ2
G protein gated Potassium channels Homo sapiens R-HSA-1296059	1/25	0.917901	0.999995	0	0	0.396151	0.0339365	KCNJ2
TRP channels Homo sapiens R-HSA-3295583	1/25	0.917901	0.999995	0	0	0.396151	0.0339365	MCOLN1
Glyoxylate metabolism and glycine degradation Homo sapiens R-HSA-389661	1/25	0.917901	0.999995	0	0	0.396151	0.0339365	DHTKD1
Resolution of Sister Chromatid Cohesion Homo sapiens R-HSA-2500257	6/99	0.918514	0.999995	0	0	0.612665	0.0520755	RANBP2;DSN1;STAG1;AHCTF1;ZW10;CENPN
Signaling by Retinoic Acid Homo sapiens R-HSA-5362517	2/42	0.918794	0.999995	0	0	0.475211	0.0402469	CRABP2;RDH11
Non-integrin membrane-ECM interactions Homo sapiens R-HSA-3000171	2/42	0.918794	0.999995	0	0	0.475211	0.0402469	LAMA1;FGF2
Deactivation of the beta-catenin transactivating complex Homo sapiens R-HSA-3769402	2/42	0.918794	0.999995	0	0	0.475211	0.0402469	TCF7;XIAP
BMAL1:CLOCK,NPAS2 activates circadian gene expression Homo sapiens R-HSA-1368108	2/42	0.918794	0.999995	0	0	0.475211	0.0402469	NAMPT;PPARA
Insulin receptor signalling cascade Homo sapiens R-HSA-74751	21/287	0.92003	0.999995	0	0	0.748426	0.0623803	DUSP4;PSMD12;PSPN;IRS2;TSC1;CSF2RB;NRG1;RASAL3;PRKAB1;DUSP9;FGF2;MTOR;SPRED2;RRAGC;PSMC4;RRAGD;AKAP9;AKT1S1;TRIB3;LAMTOR3;LAT
ISG15 antiviral mechanism Homo sapiens R-HSA-1169408	4/72	0.920818	0.999995	0	0	0.558793	0.0460966	NDC1;RANBP2;NEDD4;AAAS
Antiviral mechanism by IFN-stimulated genes Homo sapiens R-HSA-1169410	4/72	0.920818	0.999995	0	0	0.558793	0.0460966	NDC1;RANBP2;NEDD4;AAAS
Removal of licensing factors from origins Homo sapiens R-HSA-69300	4/72	0.920818	0.999995	0	0	0.558793	0.0460966	PSMD12;ORC6;ORC1;PSMC4
IGF1R signaling cascade Homo sapiens R-HSA-2428924	21/288	0.922714	0.999995	0	0	0.745581	0.0599718	DUSP4;PSMD12;PSPN;IRS2;TSC1;CSF2RB;NRG1;RASAL3;PRKAB1;DUSP9;FGF2;MTOR;SPRED2;RRAGC;PSMC4;RRAGD;AKAP9;AKT1S1;TRIB3;LAMTOR3;LAT
Signaling by Type 1 Insulin-like Growth Factor 1 Receptor (IGF1R) Homo sapiens R-HSA-2404192	21/288	0.922714	0.999995	0	0	0.745581	0.0599718	DUSP4;PSMD12;PSPN;IRS2;TSC1;CSF2RB;NRG1;RASAL3;PRKAB1;DUSP9;FGF2;MTOR;SPRED2;RRAGC;PSMC4;RRAGD;AKAP9;AKT1S1;TRIB3;LAMTOR3;LAT
IRS-related events triggered by IGF1R Homo sapiens R-HSA-2428928	21/288	0.922714	0.999995	0	0	0.745581	0.0599718	DUSP4;PSMD12;PSPN;IRS2;TSC1;CSF2RB;NRG1;RASAL3;PRKAB1;DUSP9;FGF2;MTOR;SPRED2;RRAGC;PSMC4;RRAGD;AKAP9;AKT1S1;TRIB3;LAMTOR3;LAT
Phase II conjugation Homo sapiens R-HSA-156580	6/100	0.922911	0.999995	0	0	0.606114	0.0486241	TPMT;MGST1;AKR1A1;MTR;GGT1;CNDP2
NIK-->noncanonical NF-kB signaling Homo sapiens R-HSA-5676590	3/58	0.923227	0.999995	0	0	0.518254	0.0413983	PSMD12;PSMC4;NFKB2
Formation of Incision Complex in GG-NER Homo sapiens R-HSA-5696395	2/43	0.925103	0.999995	0	0	0.463594	0.0360909	RPA2;ERCC5
Signaling by FGFR2 in disease Homo sapiens R-HSA-5655253	2/43	0.925103	0.999995	0	0	0.463594	0.0360909	GTF2F1;FGF2
Amine ligand-binding receptors Homo sapiens R-HSA-375280	2/43	0.925103	0.999995	0	0	0.463594	0.0360909	HTR2B;ADRA2C
Fertilization Homo sapiens R-HSA-1187000	1/26	0.925718	0.999995	0	0	0.380284	0.0293523	CATSPER1
Reproduction Homo sapiens R-HSA-1474165	1/26	0.925718	0.999995	0	0	0.380284	0.0293523	CATSPER1
Diseases associated with glycosaminoglycan metabolism Homo sapiens R-HSA-3560782	1/26	0.925718	0.999995	0	0	0.380284	0.0293523	BCAN
Termination of O-glycan biosynthesis Homo sapiens R-HSA-977068	1/26	0.925718	0.999995	0	0	0.380284	0.0293523	MUC20
Recycling pathway of L1 Homo sapiens R-HSA-437239	1/26	0.925718	0.999995	0	0	0.380284	0.0293523	RPS6KA5
N-glycan antennae elongation in the medial/trans-Golgi Homo sapiens R-HSA-975576	1/26	0.925718	0.999995	0	0	0.380284	0.0293523	FUCA1
FGFR2 alternative splicing Homo sapiens R-HSA-6803529	1/26	0.925718	0.999995	0	0	0.380284	0.0293523	GTF2F1
SHC-mediated cascade:FGFR2 Homo sapiens R-HSA-5654699	1/26	0.925718	0.999995	0	0	0.380284	0.0293523	FGF2
WNT ligand biogenesis and trafficking Homo sapiens R-HSA-3238698	1/26	0.925718	0.999995	0	0	0.380284	0.0293523	VPS35
CaM pathway Homo sapiens R-HSA-111997	1/26	0.925718	0.999995	0	0	0.380284	0.0293523	ADCY7
Calmodulin induced events Homo sapiens R-HSA-111933	1/26	0.925718	0.999995	0	0	0.380284	0.0293523	ADCY7
Ligand-gated ion channel transport Homo sapiens R-HSA-975298	1/26	0.925718	0.999995	0	0	0.380284	0.0293523	GLRB
Positive epigenetic regulation of rRNA expression Homo sapiens R-HSA-5250913	4/73	0.92575	0.999995	0	0	0.550664	0.042484	MYBBP1A;POLR1B;TAF1A;DDX21
The role of GTSE1 in G2/M progression after G2 checkpoint Homo sapiens R-HSA-8852276	3/59	0.928498	0.999995	0	0	0.508971	0.0377588	PSMD12;FKBPL;PSMC4
Downstream signaling events of B Cell Receptor (BCR) Homo sapiens R-HSA-1168372	13/192	0.928594	0.999995	0	0	0.688925	0.0510379	PSMD12;IRS2;NRG1;FOXO4;FGF2;RELA;MTOR;AGO3;PSMC4;AKT1S1;REL;TRIB3;NFKBIB
Respiratory electron transport Homo sapiens R-HSA-611105	5/88	0.930002	0.999995	0	0	0.572083	0.0415149	ACAD9;NDUFAF2;CYCS;NDUFS1;NDUFV3
Sphingolipid metabolism Homo sapiens R-HSA-428157	4/74	0.930405	0.999995	0	0	0.542767	0.0391528	ASAH2;OSBP;NEU1;KDSR
Phospholipase C-mediated cascade; FGFR3 Homo sapiens R-HSA-5654227	2/44	0.930947	0.999995	0	0	0.452531	0.03238	FGF2;ADCY7
Phase 0 - rapid depolarisation Homo sapiens R-HSA-5576892	2/44	0.930947	0.999995	0	0	0.452531	0.03238	CACNA2D2;SCN3B
Metabolism Homo sapiens R-HSA-1430728	164/1908	0.931097	0.999995	0	0	0.884854	0.0631713	DMGDH;ALDH1L1;SLC46A1;PANK3;TPMT;GXYLT1;MT1X;CNDP2;NUBP2;FADS2;LIPE;MT2A;HYKK;PPIP5K2;MPC1;PPAT;NAMPT;OSBP;CYP1B1;GGT1;FADS1;NUDT13;XYLB;CA13;PHYH;PCYT2;DGAT2;ACSL1;GPT2;ACOT11;CACNA2D2;PHKA1;GCAT;CH25H;BCAN;MT1A;MTHFD2L;MT1F;MT1G;TRIB3;PI4K2A;IPPK;PFKFB2;IDI1;UBIAD1;PSMD12;SAR1B;INSIG2;ABHD3;INSIG1;MGST1;PLD6;AAAS;SLC5A3;ACACA;ACAT1;AK9;CYP27B1;RDH11;MED31;NEU1;PMVK;INPP5J;HMOX1;ST3GAL6;KDSR;NDU…
Keratan sulfate biosynthesis Homo sapiens R-HSA-2022854	1/27	0.932792	0.999995	0	0	0.365638	0.0254387	ST3GAL6
RNA Polymerase III Transcription Initiation From Type 2 Promoter Homo sapiens R-HSA-76066	1/27	0.932792	0.999995	0	0	0.365638	0.0254387	POLR3E
Interleukin-6 family signaling Homo sapiens R-HSA-6783589	1/27	0.932792	0.999995	0	0	0.365638	0.0254387	LIF
Integrin alphaIIb beta3 signaling Homo sapiens R-HSA-354192	1/27	0.932792	0.999995	0	0	0.365638	0.0254387	RAPGEF3
Prefoldin mediated transfer of substrate to CCT/TriC Homo sapiens R-HSA-389957	1/27	0.932792	0.999995	0	0	0.365638	0.0254387	TUBA4A
CREB phosphorylation through the activation of Ras Homo sapiens R-HSA-442742	1/27	0.932792	0.999995	0	0	0.365638	0.0254387	AKAP9
Phase 1 - inactivation of fast Na+ channels Homo sapiens R-HSA-5576894	1/27	0.932792	0.999995	0	0	0.365638	0.0254387	CACNA2D2
Effects of PIP2 hydrolysis Homo sapiens R-HSA-114508	1/27	0.932792	0.999995	0	0	0.365638	0.0254387	DGKI
RHO GTPases activate PKNs Homo sapiens R-HSA-5625740	3/60	0.933436	0.999995	0	0	0.500014	0.0344426	AR;KDM4C;PKN2
Regulation of DNA replication Homo sapiens R-HSA-69304	4/75	0.934794	0.999995	0	0	0.535093	0.0360811	PSMD12;ORC6;ORC1;PSMC4
RMTs methylate histone arginines Homo sapiens R-HSA-3214858	2/45	0.936357	0.999995	0	0	0.441983	0.0290639	PRMT5;PBRM1
G-protein mediated events Homo sapiens R-HSA-112040	2/45	0.936357	0.999995	0	0	0.441983	0.0290639	GNAL;ADCY7
Constitutive Signaling by Aberrant PI3K in Cancer Homo sapiens R-HSA-2219530	3/61	0.938056	0.999995	0	0	0.491366	0.0314204	IRS2;NRG1;FGF2
Ca2+ pathway Homo sapiens R-HSA-4086398	3/61	0.938056	0.999995	0	0	0.491366	0.0314204	FZD5;AGO3;TCF7
Cell-Cell communication Homo sapiens R-HSA-1500931	8/131	0.938678	0.999995	0	0	0.617268	0.0390625	CLDN3;PARD6A;CLDN15;CLDN12;ANG;CDH15;CLDN1;MAPK13
Transcription-Coupled Nucleotide Excision Repair (TC-NER) Homo sapiens R-HSA-6781827	4/76	0.93893	0.999995	0	0	0.527631	0.0332485	LIG1;UVSSA;RPA2;ERCC5
RNA Polymerase III Transcription Initiation From Type 1 Promoter Homo sapiens R-HSA-76061	1/28	0.939192	0.999995	0	0	0.352076	0.0220878	POLR3E
Recognition of DNA damage by PCNA-containing replication complex Homo sapiens R-HSA-110314	1/28	0.939192	0.999995	0	0	0.352076	0.0220878	RPA2
Ca-dependent events Homo sapiens R-HSA-111996	1/28	0.939192	0.999995	0	0	0.352076	0.0220878	ADCY7
G alpha (z) signalling events Homo sapiens R-HSA-418597	2/46	0.941364	0.999995	0	0	0.431914	0.0260986	ADRA2C;ADCY7
Phospholipase C-mediated cascade; FGFR4 Homo sapiens R-HSA-5654228	2/46	0.941364	0.999995	0	0	0.431914	0.0260986	FGF2;ADCY7
Oxidative Stress Induced Senescence Homo sapiens R-HSA-2559580	5/91	0.941647	0.999995	0	0	0.552034	0.0331911	KDM6B;CDKN2B;AGO3;TNIK;PHC3
Diseases associated with O-glycosylation of proteins Homo sapiens R-HSA-3906995	3/62	0.942379	0.999995	0	0	0.483011	0.0286656	NOTCH4;C1GALT1;MUC20
Gap-filling DNA repair synthesis and ligation in TC-NER Homo sapiens R-HSA-6782210	3/62	0.942379	0.999995	0	0	0.483011	0.0286656	LIG1;UVSSA;RPA2
Autodegradation of Cdh1 by Cdh1:APC/C Homo sapiens R-HSA-174084	3/62	0.942379	0.999995	0	0	0.483011	0.0286656	PSMD12;PSMC4;ANAPC10
Senescence-Associated Secretory Phenotype (SASP) Homo sapiens R-HSA-2559582	4/77	0.942826	0.999995	0	0	0.520375	0.0306365	CDKN2B;CXCL8;RELA;ANAPC10
YAP1- and WWTR1 (TAZ)-stimulated gene expression Homo sapiens R-HSA-2032785	1/29	0.944982	0.999995	0	0	0.339483	0.019211	PPARA
RNA Polymerase I Transcription Initiation Homo sapiens R-HSA-73762	2/47	0.945995	0.999995	0	0	0.422292	0.023445	POLR1B;TAF1A
Antigen activates B Cell Receptor (BCR) leading to generation of second messengers Homo sapiens R-HSA-983695	2/47	0.945995	0.999995	0	0	0.422292	0.023445	SRMS;CBLB
Phospholipase C-mediated cascade: FGFR1 Homo sapiens R-HSA-5654219	2/47	0.945995	0.999995	0	0	0.422292	0.023445	FGF2;ADCY7
Dual incision in TC-NER Homo sapiens R-HSA-6782135	3/63	0.94642	0.999995	0	0	0.474934	0.0261539	UVSSA;RPA2;ERCC5
p53-Dependent G1/S DNA damage checkpoint Homo sapiens R-HSA-69580	3/63	0.94642	0.999995	0	0	0.474934	0.0261539	PSMD12;PSMC4;ATM
p53-Dependent G1 DNA Damage Response Homo sapiens R-HSA-69563	3/63	0.94642	0.999995	0	0	0.474934	0.0261539	PSMD12;PSMC4;ATM
Circadian Clock Homo sapiens R-HSA-400253	3/63	0.94642	0.999995	0	0	0.474934	0.0261539	SREBF1;NAMPT;PPARA
Mitotic Prophase Homo sapiens R-HSA-68875	6/107	0.948254	0.999995	0	0	0.563886	0.0299612	GOLGA2;NDC1;RANBP2;AAAS;LPIN1;BLZF1
Molecules associated with elastic fibres Homo sapiens R-HSA-2129379	1/30	0.950222	0.999995	0	0	0.327759	0.0167353	BMP2
Termination of translesion DNA synthesis Homo sapiens R-HSA-5656169	1/30	0.950222	0.999995	0	0	0.327759	0.0167353	RPA2
Glucagon-type ligand receptors Homo sapiens R-HSA-420092	1/30	0.950222	0.999995	0	0	0.327759	0.0167353	GIPR
G beta:gamma signalling through PI3Kgamma Homo sapiens R-HSA-392451	2/48	0.950275	0.999995	0	0	0.413089	0.0210691	CSF2RB;GAB2
Chromatin organization Homo sapiens R-HSA-4839726	15/226	0.950684	0.999995	0	0	0.673867	0.0340796	KDM6B;PRMT5;PBRM1;KDM4C;KMT2A;KMT2C;SETDB2;SETD7;TAF9;ELP2;ELP5;JMJD6;EP400;TADA1;RCOR1
Chromatin modifying enzymes Homo sapiens R-HSA-3247509	15/226	0.950684	0.999995	0	0	0.673867	0.0340796	KDM6B;PRMT5;PBRM1;KDM4C;KMT2A;KMT2C;SETDB2;SETD7;TAF9;ELP2;ELP5;JMJD6;EP400;TADA1;RCOR1
Separation of Sister Chromatids Homo sapiens R-HSA-2467813	10/162	0.951316	0.999995	0	0	0.624026	0.0311448	RANBP2;PSMD12;DSN1;STAG1;AHCTF1;ESPL1;PSMC4;ZW10;CENPN;ANAPC10
G1/S DNA Damage Checkpoints Homo sapiens R-HSA-69615	3/65	0.953723	0.999995	0	0	0.459563	0.021775	PSMD12;PSMC4;ATM
Regulation of activated PAK-2p34 by proteasome mediated degradation Homo sapiens R-HSA-211733	2/49	0.954231	0.999995	0	0	0.404278	0.0189404	PSMD12;PSMC4
Cross-presentation of soluble exogenous antigens (endosomes) Homo sapiens R-HSA-1236978	2/49	0.954231	0.999995	0	0	0.404278	0.0189404	PSMD12;PSMC4
Phospholipase C-mediated cascade; FGFR2 Homo sapiens R-HSA-5654221	2/49	0.954231	0.999995	0	0	0.404278	0.0189404	FGF2;ADCY7
C-type lectin receptors (CLRs) Homo sapiens R-HSA-5621481	7/123	0.954332	0.999995	0	0	0.572623	0.0267665	PSMD12;RPS6KA5;PSMC4;ICAM2;ICAM3;RELA;NFKB2
Chaperonin-mediated protein folding Homo sapiens R-HSA-390466	5/95	0.954451	0.999995	0	0	0.527382	0.024586	ARFGEF2;CSNK2A1;FBXO6;SKIV2L;TUBA4A
Trafficking of AMPA receptors Homo sapiens R-HSA-399719	1/31	0.954963	0.999995	0	0	0.316816	0.0145998	PICK1
Glutamate Binding, Activation of AMPA Receptors and Synaptic Plasticity Homo sapiens R-HSA-399721	1/31	0.954963	0.999995	0	0	0.316816	0.0145998	PICK1
Packaging Of Telomere Ends Homo sapiens R-HSA-171306	1/31	0.954963	0.999995	0	0	0.316816	0.0145998	POT1
Disassembly of the destruction complex and recruitment of AXIN to the membrane Homo sapiens R-HSA-4641262	1/31	0.954963	0.999995	0	0	0.316816	0.0145998	FZD5
NCAM signaling for neurite out-growth Homo sapiens R-HSA-375165	18/266	0.955147	0.999995	0	0	0.687667	0.0315567	DUSP4;PRNP;PSMD12;PSPN;IRS2;CSF2RB;NRG1;RASAL3;DUSP9;FGF2;SPRED2;RPS6KA5;PSMC4;COL4A4;AKAP9;COL4A3;LAMTOR3;LAT
Integration of energy metabolism Homo sapiens R-HSA-163685	6/110	0.956607	0.999995	0	0	0.547529	0.0242897	FASN;CACNA2D2;ADRA2C;ADCY7;ACACA;RAPGEF3
APC/C:Cdc20 mediated degradation of Securin Homo sapiens R-HSA-174154	3/66	0.957015	0.999995	0	0	0.452243	0.0198698	PSMD12;PSMC4;ANAPC10
CDK-mediated phosphorylation and removal of Cdc6 Homo sapiens R-HSA-69017	2/50	0.957884	0.999995	0	0	0.395833	0.0170322	PSMD12;PSMC4
Ubiquitin-dependent degradation of Cyclin D1 Homo sapiens R-HSA-69229	2/50	0.957884	0.999995	0	0	0.395833	0.0170322	PSMD12;PSMC4
Ubiquitin-dependent degradation of Cyclin D Homo sapiens R-HSA-75815	2/50	0.957884	0.999995	0	0	0.395833	0.0170322	PSMD12;PSMC4
Regulation of Apoptosis Homo sapiens R-HSA-169911	2/50	0.957884	0.999995	0	0	0.395833	0.0170322	PSMD12;PSMC4
Regulation of ornithine decarboxylase (ODC) Homo sapiens R-HSA-350562	2/50	0.957884	0.999995	0	0	0.395833	0.0170322	PSMD12;PSMC4
Global Genome Nucleotide Excision Repair (GG-NER) Homo sapiens R-HSA-5696399	4/82	0.959107	0.999995	0	0	0.486882	0.0203288	INO80D;LIG1;RPA2;ERCC5
Keratan sulfate/keratin metabolism Homo sapiens R-HSA-1638074	1/32	0.959252	0.999995	0	0	0.306579	0.0127541	ST3GAL6
TRAF6 mediated IRF7 activation Homo sapiens R-HSA-933541	1/32	0.959252	0.999995	0	0	0.306579	0.0127541	SIKE1
Cooperation of Prefoldin and TriC/CCT in actin and tubulin folding Homo sapiens R-HSA-389958	1/32	0.959252	0.999995	0	0	0.306579	0.0127541	TUBA4A
Thrombin signalling through proteinase activated receptors (PARs) Homo sapiens R-HSA-456926	1/32	0.959252	0.999995	0	0	0.306579	0.0127541	F2RL3
DAG and IP3 signaling Homo sapiens R-HSA-1489509	1/32	0.959252	0.999995	0	0	0.306579	0.0127541	ADCY7
Signaling by EGFR Homo sapiens R-HSA-177929	25/355	0.959285	0.999995	0	0	0.717134	0.0298088	PSMD12;IRS2;CSF2RB;PTPRK;FOXO4;RASAL3;ADCY7;FGF2;SPRED2;PAG1;DUSP4;PSPN;NRG1;STAM;DUSP9;MTOR;ADAM17;AGO3;PSMC4;AKAP9;AKT1S1;SPRY2;TRIB3;LAMTOR3;LAT
Visual phototransduction Homo sapiens R-HSA-2187338	5/97	0.959842	0.999995	0	0	0.51586	0.0211436	RDH11;CYP4V2;AKR1C1;APOA4;LRP8
Programmed Cell Death Homo sapiens R-HSA-5357801	10/166	0.960042	0.999995	0	0	0.60789	0.024789	PSMD12;OCLN;BCL2L11;PSMC4;BCL2;LY96;CYCS;XIAP;TNFRSF10A;BIRC3
Neurotransmitter Release Cycle Homo sapiens R-HSA-112310	2/51	0.961257	0.999995	0	0	0.387734	0.0153208	LIN7B;PPFIA3
Vpu mediated degradation of CD4 Homo sapiens R-HSA-180534	2/51	0.961257	0.999995	0	0	0.387734	0.0153208	PSMD12;PSMC4
G-protein beta:gamma signalling Homo sapiens R-HSA-397795	2/51	0.961257	0.999995	0	0	0.387734	0.0153208	CSF2RB;GAB2
G1/S Transition Homo sapiens R-HSA-69206	6/112	0.961476	0.999995	0	0	0.537139	0.0211017	PSMD12;ORC6;ORC1;MAX;PSMC4;RPA2
Cyclin E associated events during G1/S transition Homo sapiens R-HSA-69202	3/68	0.962951	0.999995	0	0	0.438279	0.0165463	PSMD12;MAX;PSMC4
Glucagon signaling in metabolic regulation Homo sapiens R-HSA-163359	1/33	0.963133	0.999995	0	0	0.296982	0.0111557	ADCY7
Signaling by the B Cell Receptor (BCR) Homo sapiens R-HSA-983705	15/233	0.963416	0.999995	0	0	0.651974	0.0242991	PSMD12;SRMS;CBLB;IRS2;NRG1;FOXO4;FGF2;RELA;MTOR;AGO3;PSMC4;AKT1S1;REL;TRIB3;NFKBIB
Signalling to RAS Homo sapiens R-HSA-167044	16/246	0.963776	0.999995	0	0	0.659062	0.0243171	DUSP4;PSMD12;RALA;PSPN;IRS2;CSF2RB;NRG1;RASAL3;DUSP9;FGF2;MAPK13;SPRED2;PSMC4;AKAP9;LAMTOR3;LAT
Class B/2 (Secretin family receptors) Homo sapiens R-HSA-373080	4/84	0.964324	0.999995	0	0	0.474658	0.0172431	FZD5;GIPR;PTHLH;CD55
Deposition of new CENPA-containing nucleosomes at the centromere Homo sapiens R-HSA-606279	2/52	0.964369	0.999995	0	0	0.379958	0.0137852	MIS18BP1;CENPN
Nucleosome assembly Homo sapiens R-HSA-774815	2/52	0.964369	0.999995	0	0	0.379958	0.0137852	MIS18BP1;CENPN
Cyclin A:Cdk2-associated events at S phase entry Homo sapiens R-HSA-69656	3/69	0.965621	0.999995	0	0	0.431615	0.0150996	PSMD12;MAX;PSMC4
Negative regulators of RIG-I/MDA5 signaling Homo sapiens R-HSA-936440	1/34	0.966645	0.999995	0	0	0.287966	0.00976898	CYLD
EPHA-mediated growth cone collapse Homo sapiens R-HSA-3928663	1/34	0.966645	0.999995	0	0	0.287966	0.00976898	EFNA3
EGFR interacts with phospholipase C-gamma Homo sapiens R-HSA-212718	1/34	0.966645	0.999995	0	0	0.287966	0.00976898	ADCY7
PLC-gamma1 signalling Homo sapiens R-HSA-167021	1/34	0.966645	0.999995	0	0	0.287966	0.00976898	ADCY7
Collagen formation Homo sapiens R-HSA-1474290	4/85	0.966695	0.999995	0	0	0.468772	0.0158786	COL4A4;COL4A3;COL10A1;P4HB
Vif-mediated degradation of APOBEC3G Homo sapiens R-HSA-180585	2/53	0.967241	0.999995	0	0	0.372487	0.0124068	PSMD12;PSMC4
Cell surface interactions at the vascular wall Homo sapiens R-HSA-202733	5/101	0.968907	0.999995	0	0	0.494256	0.0156118	SLC7A8;MMP1;PROS1;OLR1;SLC7A11
Protein folding Homo sapiens R-HSA-391251	5/101	0.968907	0.999995	0	0	0.494256	0.0156118	ARFGEF2;CSNK2A1;FBXO6;SKIV2L;TUBA4A
Regulation of mRNA stability by proteins that bind AU-rich elements Homo sapiens R-HSA-450531	4/86	0.968917	0.999995	0	0	0.463029	0.0146206	ZFP36;PSMD12;DIS3;PSMC4
RNA Polymerase I, RNA Polymerase III, and Mitochondrial Transcription Homo sapiens R-HSA-504046	6/116	0.969751	0.999995	0	0	0.517491	0.0158952	BRF2;POLR1B;TAF1A;POLR3E;TFB2M;POLRMT
SIRT1 negatively regulates rRNA Expression Homo sapiens R-HSA-427359	1/35	0.969822	0.999995	0	0	0.279481	0.00856401	TAF1A
SCF-beta-TrCP mediated degradation of Emi1 Homo sapiens R-HSA-174113	2/54	0.969888	0.999995	0	0	0.365304	0.0111689	PSMD12;PSMC4
AUF1 (hnRNP D0) binds and destabilizes mRNA Homo sapiens R-HSA-450408	2/54	0.969888	0.999995	0	0	0.365304	0.0111689	PSMD12;PSMC4
APC/C:Cdh1 mediated degradation of Cdc20 and other APC/C:Cdh1 targeted proteins in late mitosis/early G1 Homo sapiens R-HSA-174178	3/71	0.970426	0.999995	0	0	0.418874	0.0125749	PSMD12;PSMC4;ANAPC10
Cdc20:Phospho-APC/C mediated degradation of Cyclin A Homo sapiens R-HSA-174184	3/71	0.970426	0.999995	0	0	0.418874	0.0125749	PSMD12;PSMC4;ANAPC10
Mitotic Anaphase Homo sapiens R-HSA-68882	10/173	0.972009	0.999995	0	0	0.581557	0.0165104	RANBP2;PSMD12;DSN1;STAG1;AHCTF1;ESPL1;PSMC4;ZW10;CENPN;ANAPC10
Transcriptional regulation by small RNAs Homo sapiens R-HSA-5578749	3/72	0.972582	0.999995	0	0	0.41278	0.0114755	NDC1;RANBP2;AAAS
APC:Cdc20 mediated degradation of cell cycle proteins prior to satisfation of the cell cycle checkpoint Homo sapiens R-HSA-179419	3/72	0.972582	0.999995	0	0	0.41278	0.0114755	PSMD12;PSMC4;ANAPC10
Signaling by FGFR Homo sapiens R-HSA-190236	25/366	0.972631	0.999995	0	0	0.693571	0.019247	PSMD12;IRS2;CSF2RB;FOXO4;RASAL3;ADCY7;FGF2;SPRED2;FLRT2;FGFBP3;DUSP4;PSPN;GALNT3;NRG1;GTF2F1;DUSP9;MTOR;AGO3;PSMC4;AKAP9;AKT1S1;SPRY2;TRIB3;LAMTOR3;LAT
MHC class II antigen presentation Homo sapiens R-HSA-2132295	5/103	0.972693	0.999995	0	0	0.484116	0.0134038	DYNC2H1;KLC4;SEC24A;SAR1B;HLA-DPB1
RHO GTPases Activate WASPs and WAVEs Homo sapiens R-HSA-5663213	1/36	0.972697	0.999995	0	0	0.271481	0.00751534	WIPF3
Diseases of glycosylation Homo sapiens R-HSA-3781865	4/88	0.972953	0.999995	0	0	0.451954	0.0123923	BCAN;NOTCH4;C1GALT1;MUC20
Signalling to ERKs Homo sapiens R-HSA-187687	16/253	0.973227	0.999995	0	0	0.639346	0.0173506	DUSP4;PSMD12;RALA;PSPN;IRS2;CSF2RB;NRG1;RASAL3;DUSP9;FGF2;MAPK13;SPRED2;PSMC4;AKAP9;LAMTOR3;LAT
TCR signaling Homo sapiens R-HSA-202403	6/118	0.973245	0.999995	0	0	0.508194	0.0137821	PSMD12;PSMC4;HLA-DPB1;PAG1;LAT;RELA
Mitotic Metaphase and Anaphase Homo sapiens R-HSA-2555396	10/174	0.973424	0.999995	0	0	0.577979	0.0155679	RANBP2;PSMD12;DSN1;STAG1;AHCTF1;ESPL1;PSMC4;ZW10;CENPN;ANAPC10
Signaling by ERBB4 Homo sapiens R-HSA-1236394	22/330	0.974047	0.999995	0	0	0.675912	0.0177733	DUSP4;PSMD12;PSPN;IRS2;CSF2RB;NRG1;FOXO4;RASAL3;DUSP9;FGF2;ESR1;MTOR;SPRED2;ADAM17;AGO3;PSMC4;NEDD4;AKAP9;AKT1S1;TRIB3;LAMTOR3;LAT
Degradation of DVL Homo sapiens R-HSA-4641258	2/56	0.974578	0.999995	0	0	0.351735	0.0090573	PSMD12;PSMC4
Translesion synthesis by Y family DNA polymerases bypasses lesions on DNA template Homo sapiens R-HSA-110313	1/37	0.975298	0.999995	0	0	0.263925	0.00660138	RPA2
Apoptotic cleavage of cellular proteins Homo sapiens R-HSA-111465	1/37	0.975298	0.999995	0	0	0.263925	0.00660138	OCLN
Role of LAT2/NTAL/LAB on calcium mobilization Homo sapiens R-HSA-2730905	9/162	0.975696	0.999995	0	0	0.557627	0.0137202	AGO3;AKT1S1;IRS2;TRIB3;NRG1;FOXO4;GAB2;FGF2;MTOR
APC/C:Cdc20 mediated degradation of mitotic proteins Homo sapiens R-HSA-176409	3/74	0.976456	0.999995	0	0	0.401108	0.00955648	PSMD12;PSMC4;ANAPC10
Binding and Uptake of Ligands by Scavenger Receptors Homo sapiens R-HSA-2173782	3/74	0.976456	0.999995	0	0	0.401108	0.00955648	FTH1;HYOU1;FTL
Negative regulation of the PI3K/AKT network Homo sapiens R-HSA-199418	4/90	0.976494	0.999995	0	0	0.441395	0.0104995	IRS2;NRG1;TRIB3;FGF2
RNA Polymerase I Chain Elongation Homo sapiens R-HSA-73777	2/57	0.97665	0.999995	0	0	0.345321	0.00815878	POLR1B;TAF1A
Signaling by FGFR3 Homo sapiens R-HSA-5654741	22/333	0.976938	0.999995	0	0	0.669279	0.0156158	DUSP4;PSMD12;PSPN;GALNT3;IRS2;CSF2RB;NRG1;FOXO4;RASAL3;DUSP9;ADCY7;FGF2;MTOR;SPRED2;AGO3;PSMC4;AKAP9;AKT1S1;SPRY2;TRIB3;LAMTOR3;LAT
Apoptosis Homo sapiens R-HSA-109581	9/163	0.976984	0.999995	0	0	0.553975	0.0128991	PSMD12;OCLN;BCL2L11;PSMC4;BCL2;LY96;CYCS;XIAP;TNFRSF10A
Degradation of the extracellular matrix Homo sapiens R-HSA-1474228	5/106	0.977575	0.999995	0	0	0.469658	0.010652	BCAN;ADAM17;MMP16;MMP1;MMP15
DNA Damage Recognition in GG-NER Homo sapiens R-HSA-5696394	1/38	0.977651	0.999995	0	0	0.256778	0.00580377	INO80D
MAP2K and MAPK activation Homo sapiens R-HSA-5674135	1/38	0.977651	0.999995	0	0	0.256778	0.00580377	LAMTOR3
Glycosaminoglycan metabolism Homo sapiens R-HSA-1630316	6/121	0.977791	0.999995	0	0	0.494854	0.0111138	BCAN;HYAL1;HYAL3;GXYLT1;ST3GAL6;B4GALT7
PCP/CE pathway Homo sapiens R-HSA-4086400	4/91	0.978096	0.999995	0	0	0.436297	0.00966299	PSMD12;PARD6A;FZD5;PSMC4
Activation of APC/C and APC/C:Cdc20 mediated degradation of mitotic proteins Homo sapiens R-HSA-176814	3/75	0.978192	0.999995	0	0	0.395515	0.00872071	PSMD12;PSMC4;ANAPC10
Interleukin receptor SHC signaling Homo sapiens R-HSA-912526	15/245	0.978613	0.999995	0	0	0.617543	0.0133506	DUSP4;PSMD12;PSPN;IRS2;CSF2RB;NRG1;GAB2;RASAL3;DUSP9;FGF2;SPRED2;PSMC4;AKAP9;LAMTOR3;LAT
HATs acetylate histones Homo sapiens R-HSA-3214847	5/107	0.979012	0.999995	0	0	0.465027	0.00986377	TAF9;EP400;TADA1;ELP2;ELP5
Signaling by FGFR1 Homo sapiens R-HSA-5654736	22/336	0.979538	0.999995	0	0	0.662773	0.0137026	DUSP4;PSMD12;PSPN;IRS2;CSF2RB;NRG1;FOXO4;RASAL3;DUSP9;ADCY7;FGF2;MTOR;SPRED2;FLRT2;AGO3;PSMC4;AKAP9;AKT1S1;SPRY2;TRIB3;LAMTOR3;LAT
DNA Repair Homo sapiens R-HSA-73894	18/285	0.979577	0.999995	0	0	0.638052	0.0131656	MDC1;MBD4;FEN1;INO80D;LIG1;TOP3A;RPA2;BRCA2;MLH1;WRN;RAD50;UVSSA;ATM;ASCC2;ERCC5;TP53BP1;FAN1;ATR
MAPK6/MAPK4 signaling Homo sapiens R-HSA-5687128	4/92	0.979595	0.999995	0	0	0.431315	0.00889222	PSMD12;AGO3;PSMC4;ETV4
Phase 1 - Functionalization of compounds Homo sapiens R-HSA-211945	4/92	0.979595	0.999995	0	0	0.431315	0.00889222	CYP27B1;CYP4V2;CYP2R1;CYP1B1
Degradation of GLI1 by the proteasome Homo sapiens R-HSA-5610780	2/59	0.980315	0.999995	0	0	0.333167	0.00662392	PSMD12;PSMC4
GLI3 is processed to GLI3R by the proteasome Homo sapiens R-HSA-5610785	2/59	0.980315	0.999995	0	0	0.333167	0.00662392	PSMD12;PSMC4
Degradation of GLI2 by the proteasome Homo sapiens R-HSA-5610783	2/59	0.980315	0.999995	0	0	0.333167	0.00662392	PSMD12;PSMC4
SCF(Skp2)-mediated degradation of p27/p21 Homo sapiens R-HSA-187577	2/59	0.980315	0.999995	0	0	0.333167	0.00662392	PSMD12;PSMC4
Nucleotide Excision Repair Homo sapiens R-HSA-5696398	5/108	0.980363	0.999995	0	0	0.460487	0.00913257	INO80D;LIG1;UVSSA;RPA2;ERCC5
Signaling by SCF-KIT Homo sapiens R-HSA-1433557	21/325	0.980894	0.999995	0	0	0.653477	0.0126058	DUSP4;PSMD12;PSPN;IRS2;CSF2RB;NRG1;GAB2;FOXO4;RASAL3;DUSP9;FGF2;MTOR;SPRED2;AGO3;PSMC4;AKAP9;AKT1S1;TRIB3;LAMTOR3;LAT;SH2B2
GRB2 events in EGFR signaling Homo sapiens R-HSA-179812	14/235	0.981581	0.999995	0	0	0.59983	0.0111516	DUSP4;PSMD12;PSPN;IRS2;CSF2RB;NRG1;RASAL3;DUSP9;FGF2;SPRED2;PSMC4;AKAP9;LAMTOR3;LAT
SHC1 events in EGFR signaling Homo sapiens R-HSA-180336	14/235	0.981581	0.999995	0	0	0.59983	0.0111516	DUSP4;PSMD12;PSPN;IRS2;CSF2RB;NRG1;RASAL3;DUSP9;FGF2;SPRED2;PSMC4;AKAP9;LAMTOR3;LAT
SOS-mediated signalling Homo sapiens R-HSA-112412	14/235	0.981581	0.999995	0	0	0.59983	0.0111516	DUSP4;PSMD12;PSPN;IRS2;CSF2RB;NRG1;RASAL3;DUSP9;FGF2;SPRED2;PSMC4;AKAP9;LAMTOR3;LAT
SHC1 events in ERBB4 signaling Homo sapiens R-HSA-1250347	14/235	0.981581	0.999995	0	0	0.59983	0.0111516	DUSP4;PSMD12;PSPN;IRS2;CSF2RB;NRG1;RASAL3;DUSP9;FGF2;SPRED2;PSMC4;AKAP9;LAMTOR3;LAT
RAF/MAP kinase cascade Homo sapiens R-HSA-5673001	14/235	0.981581	0.999995	0	0	0.59983	0.0111516	DUSP4;PSMD12;PSPN;IRS2;CSF2RB;NRG1;RASAL3;DUSP9;FGF2;SPRED2;PSMC4;AKAP9;LAMTOR3;LAT
Respiratory electron transport, ATP synthesis by chemiosmotic coupling, and heat production by uncoupling proteins. Homo sapiens R-HSA-163200	5/109	0.981632	0.999995	0	0	0.456034	0.00845437	ACAD9;NDUFAF2;CYCS;NDUFS1;NDUFV3
The citric acid (TCA) cycle and respiratory electron transport Homo sapiens R-HSA-1428517	8/153	0.981638	0.999995	0	0	0.522973	0.00969215	PDP2;MPC1;ACAD9;NDUFAF2;CYCS;NDUFS1;NDUFV3;HAGH
PRC2 methylates histones and DNA Homo sapiens R-HSA-212300	1/40	0.981707	0.999995	0	0	0.243583	0.00449716	PHF1
FRS-mediated FGFR2 signaling Homo sapiens R-HSA-5654700	14/236	0.982442	0.999995	0	0	0.597095	0.0105769	DUSP4;PSMD12;PSPN;IRS2;CSF2RB;NRG1;RASAL3;DUSP9;FGF2;SPRED2;PSMC4;AKAP9;LAMTOR3;LAT
FRS-mediated FGFR4 signaling Homo sapiens R-HSA-5654712	14/236	0.982442	0.999995	0	0	0.597095	0.0105769	DUSP4;PSMD12;PSPN;IRS2;CSF2RB;NRG1;RASAL3;DUSP9;FGF2;SPRED2;PSMC4;AKAP9;LAMTOR3;LAT
FRS-mediated FGFR3 signaling Homo sapiens R-HSA-5654706	14/236	0.982442	0.999995	0	0	0.597095	0.0105769	DUSP4;PSMD12;PSPN;IRS2;CSF2RB;NRG1;RASAL3;DUSP9;FGF2;SPRED2;PSMC4;AKAP9;LAMTOR3;LAT
FRS-mediated FGFR1 signaling Homo sapiens R-HSA-5654693	14/236	0.982442	0.999995	0	0	0.597095	0.0105769	DUSP4;PSMD12;PSPN;IRS2;CSF2RB;NRG1;RASAL3;DUSP9;FGF2;SPRED2;PSMC4;AKAP9;LAMTOR3;LAT
Cell death signalling via NRAGE, NRIF and NADE Homo sapiens R-HSA-204998	2/61	0.983418	0.999995	0	0	0.321838	0.00538131	BCL2L11;SQSTM1
Elastic fibre formation Homo sapiens R-HSA-1566948	1/41	0.98345	0.999995	0	0	0.23748	0.00396324	BMP2
Histidine, lysine, phenylalanine, tyrosine, proline and tryptophan catabolism Homo sapiens R-HSA-6788656	1/41	0.98345	0.999995	0	0	0.23748	0.00396324	HYKK
Regulation of APC/C activators between G1/S and early anaphase Homo sapiens R-HSA-176408	3/79	0.98399	0.999995	0	0	0.374615	0.00604601	PSMD12;PSMC4;ANAPC10
Interleukin-2 signaling Homo sapiens R-HSA-451927	15/252	0.984576	0.999995	0	0	0.599069	0.00931184	DUSP4;PSMD12;PSPN;IRS2;CSF2RB;NRG1;GAB2;RASAL3;DUSP9;FGF2;SPRED2;PSMC4;AKAP9;LAMTOR3;LAT
ARMS-mediated activation Homo sapiens R-HSA-170984	14/239	0.984811	0.999995	0	0	0.589035	0.00901545	DUSP4;PSMD12;PSPN;IRS2;CSF2RB;NRG1;RASAL3;DUSP9;FGF2;SPRED2;PSMC4;AKAP9;LAMTOR3;LAT
Signalling to p38 via RIT and RIN Homo sapiens R-HSA-187706	14/239	0.984811	0.999995	0	0	0.589035	0.00901545	DUSP4;PSMD12;PSPN;IRS2;CSF2RB;NRG1;RASAL3;DUSP9;FGF2;SPRED2;PSMC4;AKAP9;LAMTOR3;LAT
G alpha (s) signalling events Homo sapiens R-HSA-418555	7/142	0.985012	0.999995	0	0	0.491512	0.00742273	P2RY11;GIPR;ADORA2B;PDE4D;PDE8A;ADCY7;PTHLH
Neurotransmitter Receptor Binding And Downstream Transmission In The Postsynaptic Cell Homo sapiens R-HSA-112314	7/142	0.985012	0.999995	0	0	0.491512	0.00742273	GNAL;CHRNE;AKAP9;PICK1;ADCY7;CAMKK1;KCNJ2
Netrin-1 signaling Homo sapiens R-HSA-373752	1/42	0.985027	0.999995	0	0	0.231675	0.00349517	ABLIM3
EPHB-mediated forward signaling Homo sapiens R-HSA-3928662	1/42	0.985027	0.999995	0	0	0.231675	0.00349517	ARHGEF28
Cooperation of PDCL (PhLP1) and TRiC/CCT in G-protein beta folding Homo sapiens R-HSA-6814122	1/42	0.985027	0.999995	0	0	0.231675	0.00349517	CSNK2A1
Glucagon-like Peptide-1 (GLP1) regulates insulin secretion Homo sapiens R-HSA-381676	1/42	0.985027	0.999995	0	0	0.231675	0.00349517	RAPGEF3
tRNA Aminoacylation Homo sapiens R-HSA-379724	1/42	0.985027	0.999995	0	0	0.231675	0.00349517	FARSA
Complement cascade Homo sapiens R-HSA-166658	3/80	0.98519	0.999995	0	0	0.36973	0.00551654	PROS1;C5AR1;CD55
Regulation of insulin secretion Homo sapiens R-HSA-422356	3/80	0.98519	0.999995	0	0	0.36973	0.00551654	CACNA2D2;ADRA2C;RAPGEF3
Frs2-mediated activation Homo sapiens R-HSA-170968	14/240	0.985533	0.999995	0	0	0.586396	0.00854519	DUSP4;PSMD12;PSPN;IRS2;CSF2RB;NRG1;RASAL3;DUSP9;FGF2;SPRED2;PSMC4;AKAP9;LAMTOR3;LAT
Signaling by FGFR4 Homo sapiens R-HSA-5654743	21/332	0.985731	0.999995	0	0	0.638518	0.00917658	DUSP4;PSMD12;PSPN;IRS2;CSF2RB;NRG1;FOXO4;RASAL3;DUSP9;ADCY7;FGF2;MTOR;SPRED2;AGO3;PSMC4;AKAP9;AKT1S1;SPRY2;TRIB3;LAMTOR3;LAT
Downstream signaling of activated FGFR1 Homo sapiens R-HSA-5654687	21/332	0.985731	0.999995	0	0	0.638518	0.00917658	DUSP4;PSMD12;PSPN;IRS2;CSF2RB;NRG1;FOXO4;RASAL3;DUSP9;ADCY7;FGF2;MTOR;SPRED2;FLRT2;AGO3;PSMC4;AKAP9;AKT1S1;TRIB3;LAMTOR3;LAT
MAPK1/MAPK3 signaling Homo sapiens R-HSA-5684996	14/241	0.986224	0.999995	0	0	0.58378	0.00809814	DUSP4;PSMD12;PSPN;IRS2;CSF2RB;NRG1;RASAL3;DUSP9;FGF2;SPRED2;PSMC4;AKAP9;LAMTOR3;LAT
Opioid Signalling Homo sapiens R-HSA-111885	3/81	0.986304	0.999995	0	0	0.364969	0.00503326	GNAL;PDE4D;ADCY7
M Phase Homo sapiens R-HSA-68886	16/268	0.98645	0.999995	0	0	0.600784	0.00819645	NDC1;RANBP2;AHCTF1;PSMD12;CSNK2A1;AAAS;ANAPC10;GOLGA2;DSN1;STAG1;ESPL1;PSMC4;ZW10;CENPN;LPIN1;BLZF1
Vasopressin regulates renal water homeostasis via Aquaporins Homo sapiens R-HSA-432040	1/43	0.986453	0.999995	0	0	0.226147	0.00308445	ADCY7
Voltage gated Potassium channels Homo sapiens R-HSA-1296072	1/43	0.986453	0.999995	0	0	0.226147	0.00308445	KCNC4
Host Interactions of HIV factors Homo sapiens R-HSA-162909	6/129	0.986647	0.999995	0	0	0.462463	0.0062169	NDC1;RANBP2;PSMD12;CCNT1;PSMC4;AAAS
Prolonged ERK activation events Homo sapiens R-HSA-169893	14/242	0.986884	0.999995	0	0	0.581187	0.00767323	DUSP4;PSMD12;PSPN;IRS2;CSF2RB;NRG1;RASAL3;DUSP9;FGF2;SPRED2;PSMC4;AKAP9;LAMTOR3;LAT
RHO GTPases Activate Formins Homo sapiens R-HSA-5663220	5/114	0.9869	0.999995	0	0	0.434994	0.00573591	RANBP2;DSN1;AHCTF1;ZW10;CENPN
Degradation of beta-catenin by the destruction complex Homo sapiens R-HSA-195253	3/82	0.987337	0.999995	0	0	0.36033	0.00459216	PSMD12;PSMC4;TCF7
Signaling by Leptin Homo sapiens R-HSA-2586552	14/243	0.987515	0.999995	0	0	0.578616	0.00726943	DUSP4;PSMD12;PSPN;IRS2;CSF2RB;NRG1;RASAL3;DUSP9;FGF2;SPRED2;PSMC4;AKAP9;LAMTOR3;LAT
Signaling by FGFR2 Homo sapiens R-HSA-5654738	23/361	0.987596	0.999995	0	0	0.643172	0.00802794	DUSP4;PSMD12;PSPN;IRS2;CSF2RB;NRG1;FOXO4;GTF2F1;RASAL3;DUSP9;ADCY7;FGF2;MTOR;SPRED2;AGO3;PSMC4;AKAP9;AKT1S1;SPRY2;TRIB3;FGFBP3;LAMTOR3;LAT
CLEC7A (Dectin-1) signaling Homo sapiens R-HSA-5607764	4/99	0.98767	0.999995	0	0	0.399379	0.00495488	PSMD12;PSMC4;RELA;NFKB2
Downstream TCR signaling Homo sapiens R-HSA-202424	4/99	0.98767	0.999995	0	0	0.399379	0.00495488	PSMD12;PSMC4;HLA-DPB1;RELA
Potassium Channels Homo sapiens R-HSA-1296071	4/99	0.98767	0.999995	0	0	0.399379	0.00495488	HCN3;KCNC4;KCNJ14;KCNJ2
PLC beta mediated events Homo sapiens R-HSA-112043	1/44	0.987744	0.999995	0	0	0.220875	0.00272371	ADCY7
Epigenetic regulation of gene expression Homo sapiens R-HSA-212165	5/115	0.987766	0.999995	0	0	0.431015	0.00530546	MYBBP1A;PHF1;POLR1B;TAF1A;DDX21
ER-Phagosome pathway Homo sapiens R-HSA-1236974	2/65	0.988263	0.999995	0	0	0.301337	0.00355759	PSMD12;PSMC4
PI5P, PP2A and IER3 Regulate PI3K/AKT Signaling Homo sapiens R-HSA-6811558	3/83	0.988294	0.999995	0	0	0.355806	0.00418956	IRS2;NRG1;FGF2
Signaling by ERBB2 Homo sapiens R-HSA-1227986	1/45	0.988912	0.999995	0	0	0.215843	0.00240661	NRG1
NRAGE signals death through JNK Homo sapiens R-HSA-193648	1/45	0.988912	0.999995	0	0	0.215843	0.00240661	BCL2L11
Signaling by PDGF Homo sapiens R-HSA-186797	23/364	0.989053	0.999995	0	0	0.637406	0.00701635	DUSP4;PSMD12;PSPN;IRS2;CSF2RB;NRG1;FOXO4;RASAL3;DUSP9;ADCY7;FGF2;MTOR;SPRED2;AGO3;PSMC4;COL4A4;AKAP9;PDGFC;COL4A3;AKT1S1;TRIB3;LAMTOR3;LAT
Mitochondrial translation initiation Homo sapiens R-HSA-5368286	3/84	0.989182	0.999995	0	0	0.351394	0.0038221	MRPL2;AURKAIP1;MRPL55
Mitochondrial translation termination Homo sapiens R-HSA-5419276	3/84	0.989182	0.999995	0	0	0.351394	0.0038221	MRPL2;AURKAIP1;MRPL55
Mitochondrial translation elongation Homo sapiens R-HSA-5389840	3/84	0.989182	0.999995	0	0	0.351394	0.0038221	MRPL2;AURKAIP1;MRPL55
DNA Damage Bypass Homo sapiens R-HSA-73893	1/46	0.989969	0.999995	0	0	0.211035	0.00212764	RPA2
Hedgehog 'on' state Homo sapiens R-HSA-5632684	3/85	0.990005	0.999995	0	0	0.347089	0.00348673	PSMD12;PSMC4;CDON
APC/C-mediated degradation of cell cycle proteins Homo sapiens R-HSA-174143	3/85	0.990005	0.999995	0	0	0.347089	0.00348673	PSMD12;PSMC4;ANAPC10
Regulation of mitotic cell cycle Homo sapiens R-HSA-453276	3/85	0.990005	0.999995	0	0	0.347089	0.00348673	PSMD12;PSMC4;ANAPC10
Interleukin-3, 5 and GM-CSF signaling Homo sapiens R-HSA-512988	15/261	0.990009	0.999995	0	0	0.576861	0.00579224	DUSP4;PSMD12;PSPN;IRS2;CSF2RB;NRG1;GAB2;RASAL3;DUSP9;FGF2;SPRED2;PSMC4;AKAP9;LAMTOR3;LAT
Signaling by Interleukins Homo sapiens R-HSA-449147	25/392	0.990077	0.999995	0	0	0.643492	0.00641742	PSMD12;IL20RB;IRS2;CSF2RB;NOD2;RASAL3;FGF2;RELA;SPRED2;IRAK2;STX3;DUSP4;IL32;PSPN;LIF;NRG1;IRAK3;GAB2;DUSP9;NFKB2;PSMC4;AKAP9;LAMTOR3;SQSTM1;LAT
VEGFR2 mediated cell proliferation Homo sapiens R-HSA-5218921	14/248	0.990271	0.999995	0	0	0.566094	0.00553434	DUSP4;PSMD12;PSPN;IRS2;CSF2RB;NRG1;RASAL3;DUSP9;FGF2;SPRED2;PSMC4;AKAP9;LAMTOR3;LAT
Processing of Capped Intron-Containing Pre-mRNA Homo sapiens R-HSA-72203	10/193	0.990521	0.999995	0	0	0.517422	0.00492797	NDC1;RANBP2;NUDT21;SART1;DDX39A;NXT1;UPF3B;THOC3;AAAS;GTF2F1
Downstream signaling of activated FGFR2 Homo sapiens R-HSA-5654696	20/329	0.990751	0.999995	0	0	0.611791	0.00568505	DUSP4;PSMD12;PSPN;IRS2;CSF2RB;NRG1;FOXO4;RASAL3;DUSP9;ADCY7;FGF2;MTOR;SPRED2;AGO3;PSMC4;AKAP9;AKT1S1;TRIB3;LAMTOR3;LAT
Downstream signaling of activated FGFR4 Homo sapiens R-HSA-5654716	20/329	0.990751	0.999995	0	0	0.611791	0.00568505	DUSP4;PSMD12;PSPN;IRS2;CSF2RB;NRG1;FOXO4;RASAL3;DUSP9;ADCY7;FGF2;MTOR;SPRED2;AGO3;PSMC4;AKAP9;AKT1S1;TRIB3;LAMTOR3;LAT
Downstream signaling of activated FGFR3 Homo sapiens R-HSA-5654708	20/329	0.990751	0.999995	0	0	0.611791	0.00568505	DUSP4;PSMD12;PSPN;IRS2;CSF2RB;NRG1;FOXO4;RASAL3;DUSP9;ADCY7;FGF2;MTOR;SPRED2;AGO3;PSMC4;AKAP9;AKT1S1;TRIB3;LAMTOR3;LAT
Platelet homeostasis Homo sapiens R-HSA-418346	3/87	0.991473	0.999995	0	0	0.338787	0.00290132	P2RX7;P2RX1;LRP8
EPH-ephrin mediated repulsion of cells Homo sapiens R-HSA-3928665	1/48	0.99179	0.999995	0	0	0.202033	0.00166563	EFNA3
Platelet degranulation Homo sapiens R-HSA-114608	4/105	0.992072	0.999995	0	0	0.375528	0.00298915	ABCC4;HSPA5;PROS1;TUBA4A
NGF signalling via TRKA from the plasma membrane Homo sapiens R-HSA-187037	23/374	0.992852	0.999995	0	0	0.618898	0.00443972	DUSP4;PSMD12;RALA;PSPN;IRS2;CSF2RB;NRG1;FOXO4;RASAL3;DUSP9;ADCY7;FGF2;MTOR;MAPK13;SPRED2;RPS6KA5;AGO3;PSMC4;AKAP9;AKT1S1;TRIB3;LAMTOR3;LAT
Disease Homo sapiens R-HSA-1643685	51/725	0.993156	0.999995	0	0	0.712282	0.00489155	FEN1;CCNT1;IRS2;MTR;FGF2;HEY1;TRIM24;NELFE;NDC1;LIG1;NRG1;GAB2;GTF2F1;DKK1;DNAJC3;BCAN;ADAM17;AKT1S1;CHMP4C;TLR6;HDAC4;PSMD12;RNMT;TNKS;NOTCH4;TAF9;LY96;CSF2RB;FOXO4;AAAS;HDAC6;RELA;ACACA;ERLEC1;JAG2;RANBP2;GCKR;FZD5;TAF13;IDH1;C1GALT1;SYVN1;MIB2;SUPT5H;MTOR;NFKB2;PSMC4;TAF4B;TAF5;MUC20;NFKBIB
Biological oxidations Homo sapiens R-HSA-211859	10/199	0.993267	0.999995	0	0	0.500828	0.00338359	CYP27B1;TPMT;CYP4V2;CYP2R1;MGST1;AKR1A1;CYP1B1;MTR;GGT1;CNDP2
Mitochondrial translation Homo sapiens R-HSA-5368287	3/90	0.993291	0.999995	0	0	0.327051	0.00220148	MRPL2;AURKAIP1;MRPL55
MAPK family signaling cascades Homo sapiens R-HSA-5683057	16/284	0.993742	0.999995	0	0	0.56441	0.0035434	DUSP4;PSMD12;PSPN;IRS2;CSF2RB;NRG1;RASAL3;DUSP9;FGF2;ETV4;SPRED2;AGO3;PSMC4;AKAP9;LAMTOR3;LAT
Aquaporin-mediated transport Homo sapiens R-HSA-445717	1/51	0.99392	0.999995	0	0	0.189879	0.00115793	ADCY7
Apoptotic execution phase Homo sapiens R-HSA-75153	1/51	0.99392	0.999995	0	0	0.189879	0.00115793	OCLN
Factors involved in megakaryocyte development and platelet production Homo sapiens R-HSA-983231	6/141	0.993956	0.999995	0	0	0.421074	0.00255263	KLC4;KIF16B;MAFG;RCOR1;KIF27;SH2B2
NoRC negatively regulates rRNA expression Homo sapiens R-HSA-427413	2/73	0.99417	0.999995	0	0	0.267265	0.00156275	POLR1B;TAF1A
mRNA Splicing - Minor Pathway Homo sapiens R-HSA-72165	1/52	0.9945	0.999995	0	0	0.186146	0.00102668	GTF2F1
Response to elevated platelet cytosolic Ca2+ Homo sapiens R-HSA-76005	4/110	0.994547	0.999995	0	0	0.357715	0.00195612	ABCC4;HSPA5;PROS1;TUBA4A
Downstream signal transduction Homo sapiens R-HSA-186763	20/341	0.994649	0.999995	0	0	0.588524	0.00315772	DUSP4;PSMD12;PSPN;IRS2;CSF2RB;NRG1;FOXO4;RASAL3;DUSP9;ADCY7;FGF2;MTOR;SPRED2;AGO3;PSMC4;AKAP9;AKT1S1;TRIB3;LAMTOR3;LAT
Formation of TC-NER Pre-Incision Complex Homo sapiens R-HSA-6781823	1/53	0.995024	0.999995	0	0	0.182556	0.000910683	UVSSA
Beta-catenin independent WNT signaling Homo sapiens R-HSA-3858494	6/144	0.995067	0.999995	0	0	0.411851	0.00203651	PSMD12;PARD6A;FZD5;AGO3;PSMC4;TCF7
Influenza Viral RNA Transcription and Replication Homo sapiens R-HSA-168273	5/128	0.995078	0.999995	0	0	0.385182	0.00190068	NDC1;DNAJC3;RANBP2;GTF2F1;AAAS
DAP12 signaling Homo sapiens R-HSA-2424491	20/344	0.995349	0.999995	0	0	0.582976	0.00271769	DUSP4;PSMD12;PSPN;IRS2;CSF2RB;NRG1;FOXO4;RASAL3;DUSP9;ADCY7;FGF2;MTOR;SPRED2;AGO3;PSMC4;AKAP9;AKT1S1;TRIB3;LAMTOR3;LAT
Negative epigenetic regulation of rRNA expression Homo sapiens R-HSA-5250941	2/76	0.995527	0.999995	0	0	0.256387	0.00114945	POLR1B;TAF1A
RNA Polymerase I Promoter Clearance Homo sapiens R-HSA-73854	2/76	0.995527	0.999995	0	0	0.256387	0.00114945	POLR1B;TAF1A
Signalling by NGF Homo sapiens R-HSA-166520	28/450	0.995569	0.999995	0	0	0.625835	0.00277942	PSMD12;RALA;IRS2;CSF2RB;FOXO4;RASAL3;ADCY7;FGF2;RELA;SPRED2;BCL2L11;RPS6KA5;DUSP4;PSPN;NRG1;DUSP9;MTOR;MAPK13;ADAM17;AGO3;PSMC4;AKAP9;AKT1S1;TRIB3;ARHGEF1;LAMTOR3;SQSTM1;LAT
RNA Polymerase I Transcription Homo sapiens R-HSA-73864	2/79	0.996572	0.999995	0	0	0.246357	0.000845938	POLR1B;TAF1A
Transmission across Chemical Synapses Homo sapiens R-HSA-112315	10/211	0.996674	0.999995	0	0	0.470612	0.00156804	GNAL;CHRNE;AKAP9;CACNA2D2;PICK1;ADCY7;LIN7B;CAMKK1;PPFIA3;KCNJ2
Extracellular matrix organization Homo sapiens R-HSA-1474244	15/283	0.996748	0.999995	0	0	0.528854	0.00172265	MMP1;LAMA1;ICAM2;ICAM3;FGF2;BCAN;ADAM17;BMP2;MMP16;MMP15;COL4A4;COL4A3;MATN1;COL10A1;P4HB
Formation of the beta-catenin:TCF transactivating complex Homo sapiens R-HSA-201722	1/58	0.996984	0.999995	0	0	0.166496	0.000502891	TCF7
Adaptive Immune System Homo sapiens R-HSA-1280218	52/762	0.997004	0.999995	0	0	0.688372	0.00206517	LTN1;ICAM2;ICAM3;IRS2;CBLB;FGF2;UFL1;HERC1;FBXO6;DYNC2H1;FBXW8;NRG1;PJA2;OSCAR;AKT1S1;TRIB3;RAPGEF3;CD274;PSMD12;SAR1B;UBA6;UBA5;UBR4;RNF6;FOXO4;ANAPC10;RELA;ASB16;KLC4;NCR3LG1;TNFRSF14;LONRF1;PAG1;SRMS;SEC24A;HSPA5;MIB2;HUWE1;MEX3C;MTOR;CLEC2B;AGO3;TRIM39;PSMC4;NEDD4;REL;HLA-DPB1;RLIM;LAT;ULBP3;NFKBIB;ASB1
Cardiac conduction Homo sapiens R-HSA-5576891	5/135	0.99703	0.999995	0	0	0.3643	0.00108375	AKAP9;KCNJ14;CACNA2D2;SCN3B;KCNJ2
Influenza Life Cycle Homo sapiens R-HSA-168255	5/136	0.997238	0.999995	0	0	0.361499	0.000999692	NDC1;DNAJC3;RANBP2;GTF2F1;AAAS
Antigen processing-Cross presentation Homo sapiens R-HSA-1236975	2/82	0.997376	0.999995	0	0	0.237079	0.000622888	PSMD12;PSMC4
HDACs deacetylate histones Homo sapiens R-HSA-3214815	1/60	0.997531	0.999995	0	0	0.160834	0.000397513	RCOR1
DAP12 interactions Homo sapiens R-HSA-2172127	20/359	0.997738	0.999995	0	0	0.55671	0.0012609	DUSP4;PSMD12;PSPN;IRS2;CSF2RB;NRG1;FOXO4;RASAL3;DUSP9;ADCY7;FGF2;MTOR;SPRED2;AGO3;PSMC4;AKAP9;AKT1S1;TRIB3;LAMTOR3;LAT
FCERI mediated Ca+2 mobilization Homo sapiens R-HSA-2871809	1/62	0.997979	0.999995	0	0	0.155544	0.000314601	LAT
VEGFA-VEGFR2 Pathway Homo sapiens R-HSA-4420097	17/320	0.997984	0.999995	0	0	0.529655	0.00106894	DUSP4;PSMD12;PSPN;IRS2;CSF2RB;NRG1;RASAL3;DUSP9;FGF2;MTOR;MAPK13;SPRED2;PSMC4;AKAP9;TRIB3;LAMTOR3;LAT
Immunoregulatory interactions between a Lymphoid and a non-Lymphoid cell Homo sapiens R-HSA-198933	6/157	0.997996	0.999995	0	0	0.376121	0.000754381	CLEC2B;NCR3LG1;ICAM2;ICAM3;OSCAR;ULBP3
SRP-dependent cotranslational protein targeting to membrane Homo sapiens R-HSA-1799339	3/107	0.998329	0.999995	0	0	0.273332	0.000457061	SRP54;SRPRB;SEC11C
Activation of anterior HOX genes in hindbrain development during early embryogenesis Homo sapiens R-HSA-5617472	2/89	0.998599	0.999995	0	0	0.217919	0.000305504	PAGR1;KMT2C
Activation of HOX genes during differentiation Homo sapiens R-HSA-5619507	2/89	0.998599	0.999995	0	0	0.217919	0.000305504	PAGR1;KMT2C
Signaling by VEGF Homo sapiens R-HSA-194138	17/328	0.998677	0.999995	0	0	0.515798	0.000683007	DUSP4;PSMD12;PSPN;IRS2;CSF2RB;NRG1;RASAL3;DUSP9;FGF2;MTOR;MAPK13;SPRED2;PSMC4;AKAP9;TRIB3;LAMTOR3;LAT
Semaphorin interactions Homo sapiens R-HSA-373755	1/67	0.998775	0.999995	0	0	0.14372	0.000176165	PLXNB3
Influenza Infection Homo sapiens R-HSA-168254	5/147	0.998776	0.999995	0	0	0.333291	0.000408351	NDC1;DNAJC3;RANBP2;GTF2F1;AAAS
FCERI mediated NF-kB activation Homo sapiens R-HSA-2871837	3/111	0.998803	0.999995	0	0	0.26315	0.000315186	PSMD12;PSMC4;RELA
Amyloid fiber formation Homo sapiens R-HSA-977225	1/68	0.998892	0.999995	0	0	0.141567	0.000156998	APOA4
FCERI mediated MAPK activation Homo sapiens R-HSA-2871796	14/289	0.998931	0.999995	0	0	0.480589	0.000514121	DUSP4;PSMD12;PSPN;IRS2;CSF2RB;NRG1;RASAL3;DUSP9;FGF2;SPRED2;PSMC4;AKAP9;LAMTOR3;LAT
TCF dependent signaling in response to WNT Homo sapiens R-HSA-201681	8/199	0.998976	0.999995	0	0	0.396004	0.000405702	PSMD12;CSNK2A1;FZD5;PSMC4;TNKS;TCF7;XIAP;DKK1
Interferon gamma signaling Homo sapiens R-HSA-877300	2/93	0.999023	0.999995	0	0	0.208294	0.00020356	MT2A;HLA-DPB1
Infectious disease Homo sapiens R-HSA-5663205	18/348	0.999034	0.999995	0	0	0.514418	0.000497329	NDC1;RANBP2;FEN1;PSMD12;CCNT1;LIG1;RNMT;TAF13;TAF9;AAAS;GTF2F1;SUPT5H;DNAJC3;PSMC4;CHMP4C;TAF4B;TAF5;NELFE
mRNA Splicing - Major Pathway Homo sapiens R-HSA-72163	4/134	0.999151	0.999995	0	0	0.291286	0.000247403	SART1;NUDT21;UPF3B;GTF2F1
Axon guidance Homo sapiens R-HSA-422475	30/515	0.999184	0.999995	0	0	0.581979	0.000475336	ROBO3;PSMD12;LAMA1;ARHGEF28;IRS2;ARHGAP39;CSF2RB;RASAL3;FGF2;SPRED2;RPS6KA5;ABLIM3;NRCAM;SRGAP3;SCN3B;DUSP4;PRNP;CSNK2A1;PSPN;NRG1;ANK2;DUSP9;EFNA3;PSMC4;COL4A4;AKAP9;COL4A3;PLXNB3;LAMTOR3;LAT
EPH-Ephrin signaling Homo sapiens R-HSA-2682334	2/95	0.999185	0.999995	0	0	0.203792	0.000166213	EFNA3;ARHGEF28
Fc epsilon receptor (FCERI) signaling Homo sapiens R-HSA-2454202	21/395	0.999258	0.999995	0	0	0.529079	0.000392885	DUSP4;PSMD12;PSPN;IRS2;NRG1;CSF2RB;FOXO4;GAB2;RASAL3;DUSP9;FGF2;MTOR;RELA;SPRED2;AGO3;PSMC4;AKAP9;AKT1S1;TRIB3;LAMTOR3;LAT
Platelet activation, signaling and aggregation Homo sapiens R-HSA-76002	11/253	0.999361	0.999995	0	0	0.42921	0.000274316	ABCC4;HSPA5;PROS1;CSF2RB;GAB2;ADRA2C;RAPGEF3;TUBA4A;DGKI;LAT;F2RL3
G alpha (q) signalling events Homo sapiens R-HSA-416476	7/191	0.999417	0.999995	0	0	0.359636	0.000209684	P2RY11;LTB4R2;GNRHR2;HTR2B;DGKI;LTB4R;F2RL3
RHO GTPase Effectors Homo sapiens R-HSA-195258	11/255	0.999436	0.999995	0	0	0.425644	0.000240136	RANBP2;AR;KLC4;DSN1;AHCTF1;KDM4C;ZW10;WIPF3;CENPN;PKN2;LIN7B
G alpha (12/13) signalling events Homo sapiens R-HSA-416482	1/75	0.999449	0.999995	0	0	0.128126	7.05807e-05	ARHGEF1
Neuronal System Homo sapiens R-HSA-112316	14/301	0.999465	0.999995	0	0	0.460185	0.000246221	HCN3;KCNC4;KCNJ14;CACNA2D2;ADCY7;LIN7B;CAMKK1;PANX2;GNAL;CHRNE;AKAP9;PICK1;PPFIA3;KCNJ2
Rho GTPase cycle Homo sapiens R-HSA-194840	3/122	0.999526	0.999995	0	0	0.238679	0.000113203	ARHGAP39;SRGAP3;RHOF
Metabolism of amino acids and derivatives Homo sapiens R-HSA-71291	16/335	0.99959	0.999995	0	0	0.472819	0.00019386	ARG2;PSMD12;GOT1;GPT2;MTR;PPM1K;GCAT;ASS1;AGMAT;CNDP2;ACAT1;DHTKD1;HYKK;TH;PSMC4;CTH
mRNA Splicing Homo sapiens R-HSA-72172	4/144	0.999618	0.999995	0	0	0.27033	0.000103336	SART1;NUDT21;UPF3B;GTF2F1
Nonsense-Mediated Decay (NMD) Homo sapiens R-HSA-927802	2/106	0.999699	0.999995	0	0	0.182126	5.47765e-05	UPF2;UPF3B
Nonsense Mediated Decay (NMD) enhanced by the Exon Junction Complex (EJC) Homo sapiens R-HSA-975957	2/106	0.999699	0.999995	0	0	0.182126	5.47765e-05	UPF2;UPF3B
Viral mRNA Translation Homo sapiens R-HSA-192823	1/84	0.999775	0.999995	0	0	0.114176	2.56953e-05	DNAJC3
Peptide ligand-binding receptors Homo sapiens R-HSA-375276	6/193	0.999854	0.999995	0	0	0.303104	4.4248e-05	CXCL8;C5AR1;CCL28;CXCL2;CCR10;F2RL3
Cytokine Signaling in Immune system Homo sapiens R-HSA-1280215	35/620	0.999855	0.999995	0	0	0.561214	8.13427e-05	PSMD12;IL20RB;IRS2;CSF2RB;NOD2;AAAS;RASAL3;FGF2;EDA2R;RELA;SPRED2;MT2A;IRAK2;TNFRSF14;STX3;DUSP4;NDC1;RANBP2;IL32;PSPN;LIF;NRG1;IRAK3;GAB2;DUSP9;NFKB2;ADAM17;PSMC4;NEDD4;AKAP9;HLA-DPB1;LAMTOR3;SQSTM1;LAT;BIRC3
Interferon Signaling Homo sapiens R-HSA-913531	6/196	0.999883	0.999995	0	0	0.298268	3.48937e-05	NDC1;RANBP2;MT2A;NEDD4;HLA-DPB1;AAAS
Gastrin-CREB signalling pathway via PKC and MAPK Homo sapiens R-HSA-881907	21/432	0.999893	0.999995	0	0	0.480444	5.14026e-05	DUSP4;PSMD12;P2RY11;GNRHR2;PSPN;HTR2B;IRS2;NRG1;CSF2RB;RASAL3;DUSP9;FGF2;LTB4R;SPRED2;LTB4R2;PSMC4;AKAP9;LAMTOR3;DGKI;LAT;F2RL3
Regulation of actin dynamics for phagocytic cup formation Homo sapiens R-HSA-2029482	1/97	0.999937	0.999995	0	0	0.0986433	6.24824e-06	WIPF3
Class A/1 (Rhodopsin-like receptors) Homo sapiens R-HSA-373076	13/323	0.999942	0.999995	0	0	0.394891	2.27174e-05	P2RY11;CXCL8;GNRHR2;C5AR1;HTR2B;ADRA2C;CXCL2;LTB4R;LTB4R2;ADORA2B;CCL28;CCR10;F2RL3
Signaling by Wnt Homo sapiens R-HSA-195721	11/295	0.999955	0.999995	0	0	0.364875	1.6479e-05	PSMD12;PARD6A;CSNK2A1;FZD5;AGO3;PSMC4;TNKS;TCF7;XIAP;VPS35;DKK1
Translation Homo sapiens R-HSA-72766	3/151	0.999958	0.999995	0	0	0.191602	7.98183e-06	SRP54;SRPRB;SEC11C
Developmental Biology Homo sapiens R-HSA-1266738	45/786	0.999963	0.999995	0	0	0.567619	2.12516e-05	CEBPA;ROBO3;PSMD12;LAMA1;KMT2C;ARHGEF28;IRS2;ARHGAP39;CSF2RB;RASAL3;FGF2;RELA;PAGR1;SPRED2;RPS6KA5;ABLIM3;MED10;MED31;NRCAM;SRGAP3;SCN3B;CDON;DUSP4;SPAG9;SREBF1;PRNP;CSNK2A1;PSPN;NRG1;ANK2;KLF4;DUSP9;ACVR2B;DKK1;EFNA3;PSMC4;COL4A4;AKAP9;COL4A3;PLXNB3;PPARG;CDH15;PPARA;LAMTOR3;LAT
Muscle contraction Homo sapiens R-HSA-397014	5/196	0.99997	0.999995	0	0	0.247111	7.46163e-06	AKAP9;KCNJ14;CACNA2D2;SCN3B;KCNJ2
G alpha (i) signalling events Homo sapiens R-HSA-418594	7/240	0.99998	0.999995	0	0	0.283228	5.58778e-06	CXCL8;C5AR1;ADRA2C;ADCY7;CCL28;CXCL2;CCR10
Selenoamino acid metabolism Homo sapiens R-HSA-2408522	1/111	0.999982	0.999995	0	0	0.0860217	1.55282e-06	CTH
Innate Immune System Homo sapiens R-HSA-168249	45/807	0.999982	0.999995	0	0	0.551308	9.89957e-06	PSMD12;PROS1;WIPF3;C5AR1;ICAM2;LY96;ICAM3;IRS2;CSF2RB;FOXO4;NOD2;RASAL3;ADCY7;FGF2;RELA;SPRED2;RPS6KA5;IRAK2;NLRP1;CD55;DUSP4;PSPN;TREX1;NRG1;IRAK3;GAB2;DUSP9;MTOR;NFKB2;MAPK13;P2RX7;CYLD;SIKE1;AGO3;PSMC4;POLR3E;AKAP9;AKT1S1;BCL2;TRIB3;TLR6;LAMTOR3;LAT;BIRC3;NFKBIB
Signaling by Rho GTPases Homo sapiens R-HSA-194315	14/367	0.999987	0.999995	0	0	0.372758	4.94064e-06	RANBP2;AHCTF1;KDM4C;WIPF3;ARHGAP39;RHOF;LIN7B;AR;KLC4;DSN1;ZW10;CENPN;PKN2;SRGAP3
Fcgamma receptor (FCGR) dependent phagocytosis Homo sapiens R-HSA-2029480	1/120	0.999991	0.999995	0	0	0.0794761	7.44542e-07	WIPF3
Hemostasis Homo sapiens R-HSA-109582	25/552	0.999991	0.999995	0	0	0.44408	3.81222e-06	PROS1;CSF2RB;SLC7A11;LRP8;KLC4;OLR1;SH2B2;ABCC4;HSPA5;MMP1;F12;GAB2;ADRA2C;TUBA4A;KIF27;P2RX7;SLC7A8;KIF16B;MAFG;P2RX1;RAPGEF3;DGKI;LAT;RCOR1;F2RL3
Signal Transduction Homo sapiens R-HSA-162582	131/2465	0.999992	0.999995	0	0	0.499595	3.99133e-06	CCNT1;IFT172;WIPF3;IRS2;ARHGAP39;FGF2;RPS6KA5;VPS35;PDE8A;CDON;DYNC2H1;CSNK2A1;TSC1;RPGRIP1L;GTF2F1;PRKAB1;DKK1;AR;ADAM17;LTB4R2;RRAGC;ZW10;COL4A4;AKAP9;RRAGD;COL4A3;TRIB3;SQSTM1;DGKI;NSMAF;PSMD12;CRABP2;GIPR;TNKS;NOTCH4;TCF7;C5AR1;CSF2RB;FOXO4;RASAL3;LIN7B;KLC4;DSN1;BCL2L11;FLRT2;RDH11;PDGFC;ST3GAL6;SRGAP3;ATP6V1C1;CCR10;PAG1;JAG2;SRMS;FZD5;PSPN;TNFRSF10A;STAM;ESR1;CYLD;BMP2;GNAL;AGO3;BMPR1B;LAT…
Immune System Homo sapiens R-HSA-168256	96/1547	0.999992	0.999995	0	0	0.609849	4.67142e-06	PROS1;WIPF3;LTN1;ICAM2;ICAM3;CBLB;IRS2;FGF2;EDA2R;UFL1;SPRED2;MT2A;RPS6KA5;HERC1;FBXO6;DUSP4;DYNC2H1;NDC1;ATP6V0B;FBXW8;NRG1;IRAK3;GAB2;DUSP9;PJA2;OSCAR;ADAM17;SIKE1;AKT1S1;AKAP9;TRIB3;TLR6;SQSTM1;RAPGEF3;BIRC3;CD274;PSMD12;SAR1B;UBA6;UBA5;C5AR1;UBR4;LY96;IL20RB;RNF6;CSF2RB;NOD2;FOXO4;AAAS;RASAL3;ADCY7;RELA;ANAPC10;ASB16;KLC4;IRAK2;NCR3LG1;TNFRSF14;STX3;NLRP1;ATP6V0E2;LONRF1;ATP6V1C1;PAG1;CD55;IL…
Signaling by GPCR Homo sapiens R-HSA-372790	38/1293	0.999993	0.999995	0	0	0.273598	1.89112e-06	PSMD12;CXCL8;GIPR;C5AR1;HTR2B;IRS2;CSF2RB;RASAL3;ADCY7;FGF2;CXCL2;LTB4R;PTHLH;SPRED2;PDE8A;CD55;CCR10;DUSP4;P2RY11;GNRHR2;FZD5;PSPN;PDE4D;NRG1;GAB2;ADRA2C;DUSP9;GNAL;LTB4R2;PSMC4;ADORA2B;AKAP9;ARHGEF1;CCL28;LAMTOR3;DGKI;LAT;F2RL3
GPCR downstream signaling Homo sapiens R-HSA-388396	23/983	0.999994	0.999995	0	0	0.218519	1.41156e-06	P2RY11;CXCL8;GNRHR2;GIPR;PDE4D;C5AR1;HTR2B;CSF2RB;GAB2;ADRA2C;ADCY7;CXCL2;LTB4R;PTHLH;GNAL;LTB4R2;ADORA2B;ARHGEF1;CCL28;PDE8A;DGKI;CCR10;F2RL3
GPCR ligand binding Homo sapiens R-HSA-500792	17/447	0.999994	0.999995	0	0	0.370558	2.30483e-06	P2RY11;CXCL8;FZD5;GNRHR2;GIPR;C5AR1;HTR2B;ADRA2C;CXCL2;LTB4R;PTHLH;LTB4R2;ADORA2B;CCL28;CCR10;CD55;F2RL3
Olfactory Signaling Pathway Homo sapiens R-HSA-381753	1/418	0.999995	0.999995	0	0	0.0223043	1.1409e-07	GNAL

## Sheet: UP_MSigDB
Term	Overlap	P-value	Adjusted P-value	Old P-value	Old Adjusted P-value	Odds Ratio	Combined Score	Genes
mTORC1 Signaling	43/200	2.64246e-07	1.32123e-05	0	0	2.64324	40.0355	PPP1R15A;IDI1;PSMD12;TOMM40;TFRC;INSIG1;GLRX;SLC7A11;HMGCR;ACACA;ATP5MC1;FADS2;SERP1;RDH11;NAMPT;YKT6;FADS1;HSPA9;NIBAN1;HSPA5;GOT1;HMGCS1;PNO1;ELOVL5;EDEM1;IDH1;IFRD1;ELOVL6;UCHL5;TUBA4A;SQLE;UFM1;DDX39A;PSMC4;SCD;DDIT3;CTH;MTHFD2L;TRIB3;NUPR1;DHCR7;SQSTM1;NFKBIB
Cholesterol Homeostasis	20/74	1.26804e-05	0.000293247	0	0	3.55099	40.039	NIBAN1;IDI1;FDPS;PCYT2;HMGCS1;CHKA;SEMA3B;HMGCR;HSD17B7;FADS2;SQLE;SCD;FASN;PMVK;FBXO6;MVD;TRIB3;PPARG;DHCR7;ATF3
Myc Targets V2	17/58	1.75948e-05	0.000293247	0	0	3.97191	43.4841	DDX18;PUS1;PPAN;WDR74;NOLC1;IMP4;NOC4L;TFB2M;PPRC1;IPO4;WDR43;GNL3;SUPV3L1;MYBBP1A;PES1;RRP12;FARSA
Unfolded Protein Response	21/113	0.00209357	0.0261697	0	0	2.18504	13.4793	HSPA9;HSPA5;NFYA;SLC30A5;EDEM1;GOSR2;EIF2AK3;CXXC1;NOLC1;YIF1A;HERPUD1;ERN1;DNAJC3;SERP1;SRPRA;SRPRB;DNAJB9;HYOU1;KDELR3;ATF6;ATF3
KRAS Signaling Up	30/200	0.00820995	0.0820995	0	0	1.69005	8.11629	PPP1R15A;PTPRR;GYPC;SEMA3B;LY96;GLRX;PTGS2;PCSK1N;GPNMB;EPB41L3;MAP7;PLEK2;TSPAN1;PRELID3B;ACE;GALNT3;FUCA1;LIF;G0S2;ETV1;KLF4;ETV4;YRDC;ADAM17;BMP2;TSPAN13;HKDC1;SPRY2;AVL9;BIRC3
UV Response Up	24/158	0.0144938	0.120782	0	0	1.71322	7.25385	FEN1;CDKN2B;ALAS1;TFRC;CHKA;SHOX2;DDX21;CXCL2;HSPA13;TUBA4A;BMP2;BCL2L11;PPAT;CREG1;POLE3;HMOX1;FOSB;NPTXR;E2F5;SQSTM1;YKT6;ATF3;ATP6V1C1;NUP58
Protein Secretion	16/96	0.018589	0.132778	0	0	1.91071	7.61454	NAPA;ARFGEF2;MON2;GOSR2;GBF1;STAM;CLCN3;SCAMP3;TOM1L1;GOLGA4;RER1;ZW10;ATP7A;VAMP4;SEC22B;YKT6
Androgen Response	15/100	0.0507261	0.317038	0	0	1.68456	5.0222	IDI1;ABCC4;HMGCS1;ELOVL5;INSIG1;UAP1;HMGCR;SCD;MAP7;PGM3;DNAJB9;CENPN;RRP12;BMPR1B;FADS1
Glycolysis	25/200	0.0954983	0.530546	0	0	1.36411	3.2038	IRS2;GLRX;NANP;NDUFV3;SLC35A3;MDH1;GOT1;HSPA5;IDH1;PGAM2;GFPT1;AKR1A1;EFNA3;GALE;CLDN3;GNPDA1;PSMC4;ADORA2B;CTH;RRAGD;ANG;KDELR3;B4GALT7;GALK2;GNE
Bile Acid Metabolism	15/112	0.110121	0.550605	0	0	1.47518	3.2545	IDI1;PHYH;ACSL1;PNPLA8;ABCA3;IDH1;FADS2;LIPE;AR;CH25H;PRDX5;NPC1;NEDD4;EFHC1;FADS1
TNF-alpha Signaling via NF-kB	24/200	0.139686	0.582024	0	0	1.30134	2.5615	DUSP4;KDM6B;PPP1R15A;LIF;G0S2;IRS2;PTGS2;KLF4;CXCL2;RELA;NFKB2;NR4A2;YRDC;ZFP36;BMP2;NR4A3;NAMPT;REL;OLR1;FOSB;MXD1;SQSTM1;ATF3;BIRC3
Hypoxia	24/200	0.139686	0.582024	0	0	1.30134	2.5615	PPP1R15A;DTNA;HSPA5;PGAM2;IRS2;GLRX;JMJD6;BCAN;MT2A;PRDX5;ZFP36;EFNA3;NAGK;ILVBL;ADORA2B;DDIT3;NOCT;RRAGD;BCL2;HMOX1;PLIN2;KDELR3;ATP7A;ATF3
Reactive Oxygen Species Pathway	7/49	0.180405	0.642525	0	0	1.58804	2.71959	PRNP;SRXN1;SELENOS;MGST1;GLRX;GLRX2;FTL
DNA Repair	18/150	0.180915	0.642525	0	0	1.30038	2.22329	FEN1;RALA;BRF2;LIG1;RNMT;TAF13;TAF9;UPF3B;RPA2;GTF2F1;AAAS;SUPT5H;NUDT9;NUDT21;HCLS1;ERCC5;STX3;NELFE
p53 Pathway	23/200	0.196833	0.642525	0	0	1.23934	2.01442	JAG2;PPP1R15A;H2AW;CEBPA;CDKN2B;FUCA1;OSGIN1;LIF;ELP1;CCP110;SLC7A11;KLF4;PRKAB1;BMP2;DDIT3;HMOX1;TRIB3;ERCC5;NUPR1;UPP1;MXD1;ATF3;SLC19A2
Wnt-beta Catenin Signaling	6/42	0.205608	0.642525	0	0	1.58773	2.51144	JAG2;ADAM17;HEY1;NOTCH4;TCF7;DKK1
heme Metabolism	21/200	0.349642	0.999993	0	0	1.11761	1.17444	MPP1;ALDH1L1;TFRC;GYPC;EPB41;SLC11A2;SLC10A3;MOCOS;XPO7;MOSPD1;CTNS;SLC7A11;PPOX;CLCN3;EPOR;SYNJ1;RANBP10;ACP5;HAGH;DCAF10;RHCE
Pperoxisome	11/104	0.402372	0.999993	0	0	1.12619	1.02526	IDI1;FDPS;PRDX5;CRABP2;ACSL1;RDH11;ELOVL5;ACOX1;IDH1;CLN8;FADS1
Inflammatory Response	19/200	0.537457	0.999993	0	0	0.998826	0.620178	CXCL8;FZD5;SLC31A1;SLC11A2;C5AR1;LIF;NOD2;RELA;BEST1;P2RX7;SELENOS;IRAK2;ADORA2B;LAMP3;NAMPT;OLR1;MXD1;CD55;KCNJ2
Fatty Acid Metabolism	15/158	0.542664	0.999993	0	0	0.998088	0.610096	IDI1;SLC22A5;HMGCS1;MDH1;ACSL1;ELOVL5;IDH1;G0S2;HSD17B7;MCEE;RDH11;ACOX1;FASN;BMPR1B;PPARA
Estrogen Response Early	18/200	0.633028	0.999993	0	0	0.940505	0.430038	SLC22A5;NXT1;ELOVL5;ABCA3;SEMA3B;GAB2;NAV2;KLF4;CBFA2T3;AR;MYBBP1A;FASN;KRT15;BCL2;RRP12;DHCR7;RETREG1;SLC19A2
E2F Targets	18/200	0.633028	0.999993	0	0	0.940505	0.430038	TCF19;TFRC;LIG1;CCP110;NOLC1;RPA2;BRCA2;MLH1;NUDT21;STAG1;RAD50;DDX39A;ORC6;ESPL1;WDR90;ZW10;CKS2;CNOT9
Spermatogenesis	12/135	0.640524	0.999993	0	0	0.927862	0.413333	ZC2HC1C;PCSK1N;ARL4A;ACE;CLPB;PHKG2;MAP7;PHF7;LPIN1;PCSK4;TSN;MTOR
Estrogen Response Late	17/200	0.722374	0.999993	0	0	0.882883	0.287124	SLC22A5;NXT1;ELOVL5;ABCA3;SEMA3B;CACNA2D2;DNAJC12;KLF4;ASS1;MAPK13;ZFP36;DNAJC1;GALE;TSPAN13;TH;BCL2;DHCR7
Xenobiotic Metabolism	17/200	0.722374	0.999993	0	0	0.882883	0.287124	SLC46A3;ARG2;GCKR;ALAS1;SAR1B;ELOVL5;PROS1;IDH1;ESR1;AP4B1;CNDP2;MT2A;NPC1;ACOX1;LONP1;HMOX1;UPP1
Apoptosis	13/161	0.771252	0.999993	0	0	0.834669	0.216797	XIAP;RELA;DNAJC3;TGFBR3;CYLD;BMP2;BCL2L11;DDIT3;CTH;HMOX1;SQSTM1;ATF3;BIRC3
IL-2/STAT5 Signaling	16/199	0.794513	0.999993	0	0	0.830508	0.191038	PRNP;PUS1;LIF;HUWE1;ETV4;TTC39B;SPRED2;BMP2;ARL4A;PTRH2;RRAGD;BCL2;PLIN2;SLC39A8;MXD1;SMPDL3A
Notch Signaling	2/32	0.821987	0.999993	0	0	0.633965	0.124276	FZD5;ST3GAL6
G2-M Checkpoint	15/200	0.865166	0.999993	0	0	0.76969	0.111477	PRMT5;CCNT1;ODF2;NOLC1;RPA2;BRCA2;SQLE;MT2A;STAG1;WRN;RPS6KA5;DDX39A;ORC6;ESPL1;CKS2
Myogenesis	15/200	0.865166	0.999993	0	0	0.76969	0.111477	PRNP;FDPS;DTNA;ACSL1;IFRD1;PGAM2;PDE4DIP;FOXO4;NAV2;FGF2;FABP3;EFS;SCD;PICK1;LPIN1
Hedgehog Signaling	2/36	0.869206	0.999993	0	0	0.559257	0.0783941	HEY1;NRCAM
Angiogenesis	2/36	0.869206	0.999993	0	0	0.559257	0.0783941	JAG2;OLR1
PI3K/AKT/mTOR Signaling	7/105	0.881941	0.999993	0	0	0.678477	0.085237	PIKFYVE;DDIT3;AKT1S1;TRIB3;SQSTM1;ACACA;NFKBIB
TGF-beta Signaling	3/54	0.898397	0.999993	0	0	0.559025	0.0598956	PPP1R15A;BMP2;XIAP
Mitotic Spindle	14/199	0.910978	0.999993	0	0	0.717997	0.0669433	CEP57;EPB41;TSC1;RHOF;SHROOM1;BRCA2;TUBA4A;HDAC6;BCL2L11;ESPL1;CENPJ;ALMS1;TUBGCP5;CEP192
Adipogenesis	14/200	0.914426	0.999993	0	0	0.714097	0.0638818	PHYH;IDH1;ATL2;ABCB8;ELOVL6;COQ9;LIPE;ARL4A;ACOX1;DNAJB9;PPARG;PLIN2;PIM3;DHCR7
Coagulation	9/138	0.917314	0.999993	0	0	0.662256	0.0571562	ARF4;MMP1;MMP15;PROS1;F12;OLR1;ANG;RAPGEF3;SH2B2
UV Response Dn	9/144	0.938135	0.999993	0	0	0.632611	0.0403994	TGFBR3;MMP16;SFMBT1;ADORA2B;INSIG1;TOGARAM1;PPARG;RND3;CDON
Oxidative Phosphorylation	13/200	0.949396	0.999993	0	0	0.659158	0.0342294	HSPA9;ATP6V0B;PHYH;ALAS1;MDH1;IDH1;ATP5MC1;ACAT1;SUPV3L1;MPC1;CYCS;NDUFS1;ATP6V1C1
IL-6/JAK/STAT3 Signaling	4/87	0.971001	0.999993	0	0	0.457425	0.0134611	PDGFC;HMOX1;CSF2RB;INHBE
KRAS Signaling Dn	12/200	0.972312	0.999993	0	0	0.604863	0.0169835	NR4A2;ZC2HC1C;MFSD6;KRT15;SHOX2;MTHFR;LYPD3;CDKAL1;GPR3;BMPR1B;ADRA2C;SLC29A3
Pancreas Beta Cells	1/40	0.981707	0.999993	0	0	0.243583	0.00449716	SRPRB
Apical Surface	1/44	0.987744	0.999993	0	0	0.220875	0.00272371	LYPD3
Apical Junction	10/200	0.993644	0.999993	0	0	0.498164	0.00317625	CD274;CLDN15;INSIG1;ICAM2;TSC1;MVD;RHOF;CDH15;GTF2F1;MAPK13
Epithelial Mesenchymal Transition	10/200	0.993644	0.999993	0	0	0.498164	0.00317625	IL32;TGFBR3;CXCL8;MMP1;LAMA1;FUCA1;ABI3BP;DKK1;FGF2;PTHLH
Complement	9/200	0.997385	0.999993	0	0	0.44574	0.00116728	HSPA5;MMP15;NOTCH4;OLR1;CBLB;APOA4;ANG;RBSN;CD55
Interferon Alpha Response	2/97	0.99932	0.999993	0	0	0.199479	0.000135749	LAMP3;TMEM140
Interferon Gamma Response	7/200	0.999692	0.999993	0	0	0.342693	0.000105709	CD274;MT2A;ARL4A;NAMPT;CSF2RB;UPP1;PTGS2
Myc Targets V1	7/200	0.999692	0.999993	0	0	0.342693	0.000105709	DDX18;PSMC4;IFRD1;POLE3;NOLC1;DDX21;GNL3
Allograft Rejection	4/200	0.999993	0.999993	0	0	0.19249	1.44123e-06	DYRK3;LIF;HCLS1;TLR6

## Sheet: UP_Wiki
Term	Overlap	P-value	Adjusted P-value	Old P-value	Old Adjusted P-value	Odds Ratio	Combined Score	Genes
Sterol regulatory element-binding proteins (SREBP) signaling WP1982	23/69	4.41742e-08	2.17779e-05	0	0	4.80362	81.3499	SREBF1;IDI1;FDPS;SEC24A;HMGCS1;NFYA;MDH1;SAR1B;INSIG2;INSIG1;HMGCR;PRKAB1;ACACA;MTOR;SQLE;SCD;FASN;PPARG;MVD;LPIN1;ATF6;SEC23B;FGF21
Cholesterol metabolism (includes both Bloch and Kandutsch-Russell pathways) WP4718	17/46	4.71494e-07	0.000116223	0	0	5.61919	81.8568	IDI1;FDPS;SREBF1;HMGCS1;ACSL1;ELOVL5;HMGCR;HSD17B7;FADS2;CH25H;SQLE;SCD;FASN;PMVK;MVD;DHCR7;FADS1
Photodynamic therapy-induced unfolded protein response WP3613	12/27	2.35539e-06	0.000387069	0	0	7.65418	99.189	PPP1R15A;DNAJC3;ERN1;BCL2L11;HSPA5;EDEM1;DDIT3;EIF2AK3;DNAJB9;TRIB3;ATF6;ATF3
Mevalonate arm of cholesterol biosynthesis pathway WP4190	7/11	1.62682e-05	0.00200505	0	0	16.7095	184.244	FDPS;IDI1;HMGCS1;PMVK;MVD;HMGCR;ACAT1
Cholesterol Biosynthesis Pathway WP197	8/15	2.2998e-05	0.00226761	0	0	10.9163	116.587	FDPS;IDI1;SQLE;HMGCS1;PMVK;MVD;HMGCR;DHCR7
Omega-9 FA synthesis WP4724	7/14	0.000130746	0.00971263	0	0	9.5467	85.3691	FADS2;ACSL1;ELOVL5;SCD;FASN;ELOVL6;FADS1
Mevalonate pathway WP3963	5/7	0.000137908	0.00971263	0	0	23.8482	211.985	FDPS;HMGCS1;PMVK;MVD;HMGCR
Zinc homeostasis WP3529	11/36	0.000355575	0.0201176	0	0	4.20525	33.3971	SLC30A7;SLC30A6;MT2A;SLC30A9;MT1A;SLC30A5;SLC30A4;MT1F;MT1G;MT1X;SLC39A8
SREBF and miR33 in cholesterol and lipid homeostasis WP2011	7/16	0.000367259	0.0201176	0	0	7.42439	58.7228	SREBF1;HMGCS1;SCD;FASN;HMGCR;PPARA;MTOR
Unfolded protein response WP4925	8/24	0.00120397	0.0593559	0	0	4.7735	32.088	PPP1R15A;ERN1;BCL2L11;HSPA5;DDIT3;EIF2AK3;BCL2;ATF6
Ferroptosis WP4313	10/40	0.00349553	0.156663	0	0	3.18323	18.0052	PRNP;MAP1LC3B;TFRC;ACSL1;FTH1;SLC11A2;HMOX1;SLC39A8;SLC7A11;FTL
Transcriptional cascade regulating adipogenesis WP4211	5/13	0.00518627	0.208344	0	0	5.96007	31.3603	SREBF1;CEBPA;DDIT3;PPARG;KLF15
Target Of Rapamycin (TOR) Signaling WP1471	9/36	0.00549385	0.208344	0	0	3.18207	16.5599	IDI1;RRAGC;AKT1S1;RRAGD;DDIT4L;TSC1;HMGCR;PRKAB1;MTOR
Linoleic acid metabolism known to be affected by coronavirus infection WP4853	3/5	0.00741152	0.244619	0	0	14.2938	70.1073	FADS2;ELOVL5;FADS1
Omega-3/Omega-6 FA synthesis WP4723	5/14	0.00744278	0.244619	0	0	5.29755	25.9607	FADS2;ACSL1;ELOVL5;ACOX1;FADS1
Copper homeostasis WP3286	11/52	0.00870045	0.268082	0	0	2.5619	12.1547	PRNP;MT2A;ADAM17;MT1A;SLC31A1;SLC11A2;MT1F;MT1G;XIAP;MT1X;ATP7A
Aspirin and miRNAs WP4707	4/10	0.0107093	0.310571	0	0	6.35476	28.8292	ABCC4;MVD;PPARA;PTGS2
Endoplasmic reticulum stress response in coronavirus infection WP4861	10/47	0.0116079	0.317926	0	0	2.58	11.4966	PPP1R15A;ERN1;PPP1R3F;PPP1R11;HSPA5;PPP1R3E;DDIT3;EIF2AK3;BCL2;ATF6
Metabolism of alpha-linolenic acid WP4586	3/6	0.0137781	0.357506	0	0	9.5287	40.8274	FADS2;PTGS2;FADS1
Photodynamic therapy-induced NF-kB survival signaling WP3617	8/35	0.0150481	0.370936	0	0	2.82702	11.8636	CXCL8;MMP1;REL;PTGS2;CXCL2;RELA;NFKB2;BIRC3
Iron metabolism in placenta WP2007	4/12	0.0216371	0.507957	0	0	4.76554	18.268	TFRC;FTH1;SLC11A2;MCOLN1
Joubert Syndrome WP4656	13/76	0.0262364	0.587935	0	0	1.97009	7.17234	NEK8;RAB3IP;ARMC9;CCP110;RPGRIP1L;MTOR;AHI1;TTC8;RAD50;ARL13B;TMEM67;ATM;PIBF1
Disorders of Folate Metabolism and Transport WP4259	4/13	0.0289486	0.594653	0	0	4.2358	15.0042	SLC46A1;ALDH1L1;MTHFR;MTR
Estrogen Receptor Pathway WP2881	4/13	0.0289486	0.594653	0	0	4.2358	15.0042	ACOX1;CYP1B1;PPARA;ESR1
Ciliopathies WP4803	25/183	0.041357	0.815559	0	0	1.51231	4.81749	TTC25;IFT172;ANKS3;ARL13B;TMEM67;PIBF1;DYNC2H1;NEK8;RPGRIP1L;LZTFL1;RSPH3;AHI1;TTC8;FAM161A;NME7;XPNPEP3;ALMS1;EFHC1;SPAG1;CEP83;WDPCP;CCDC65;ZMYND10;CCDC151;CCDC40
FOXA2 pathway WP5066	5/21	0.0433254	0.820245	0	0	2.97872	9.35024	SREBF1;ABCC4;FASN;IRS2;ACACA
Benzo(a)pyrene metabolism WP696	3/9	0.0465859	0.820245	0	0	4.76356	14.6073	AKR1C1;AKR1A1;CYP1B1
Folate-Alcohol and Cancer Pathway Hypotheses WP1589	3/9	0.0465859	0.820245	0	0	4.76356	14.6073	ALDH1L1;MTHFR;MTR
Glycerophospholipid Biosynthetic Pathway WP2533	6/30	0.0599179	0.910814	0	0	2.38318	6.70812	PCYT2;GK;GPAT3;CEPT1;LPIN1;PI4K2A
Liver X receptor pathway WP2874	3/10	0.0619616	0.910814	0	0	4.08283	11.3553	SREBF1;SCD;FASN
TCA cycle in senescence WP5050	3/10	0.0619616	0.910814	0	0	4.08283	11.3553	PDP2;MDH1;GOT1
Trans-sulfuration pathway WP2333	3/10	0.0619616	0.910814	0	0	4.08283	11.3553	GOT1;CTH;MTR
Vitamin D Metabolism WP1531	3/10	0.0619616	0.910814	0	0	4.08283	11.3553	CYP27B1;CYP2R1;DHCR7
Genes related to primary cilium development (based on CRISPR) WP4536	15/103	0.0628148	0.910814	0	0	1.62686	4.50244	DYNC2H1;IFT172;ARMC9;TULP3;RPGRIP1L;LZTFL1;TTC8;ARL13B;TMEM67;CDK20;CEP83;WDPCP;CEP192;CEP76;PIBF1
Synthesis and Degradation of Ketone Bodies WP311	2/5	0.074412	0.999991	0	0	6.34912	16.4959	OXCT1;ACAT1
White fat cell differentiation WP4149	6/32	0.077918	0.999991	0	0	2.19961	5.61362	CEBPA;SREBF1;DDIT3;PPARG;KLF4;KLF15
Autosomal recessive Osteopetrosis pathways WP4788	3/11	0.0793554	0.999991	0	0	3.57227	9.0515	CLCN7;OSTM1;PLEKHM1
Methionine metabolism leading to sulfur amino acids and related disorders WP4292	3/11	0.0793554	0.999991	0	0	3.57227	9.0515	CTH;ADK;MTR
Glycosylation and related congenital defects WP4521	5/25	0.0827366	0.999991	0	0	2.38245	5.93728	DPAGT1;ALG2;ALG3;MOGS;ALG11
CAMKK2 Pathway WP4874	6/34	0.0986285	0.999991	0	0	2.04227	4.7307	HDAC4;HMOX1;TSC1;SQSTM1;RELA;MTOR
Mitochondrial Gene Expression WP391	4/19	0.099779	0.999991	0	0	2.54064	5.85566	MYEF2;TFB2M;POLRMT;PPRC1
Overview of nanoparticle effects WP3287	4/19	0.099779	0.999991	0	0	2.54064	5.85566	CXCL8;BCL2;HMOX1;PTGS2
BMP2-WNT4-FOXO1 pathway in primary endometrial stromal cell differentiation WP3876	3/13	0.119489	0.999991	0	0	2.8575	6.07086	BMP2;BCL2L11;DKK1
Homologous recombination WP186	3/13	0.119489	0.999991	0	0	2.8575	6.07086	RAD50;ATM;BRCA2
Neurodegeneration with brain iron accumulation (NBIA) subtypes pathway WP4577	7/44	0.120002	0.999991	0	0	1.80314	3.8231	ATG101;AKT1S1;TSC1;GTPBP2;ACACA;MTOR;FTL
Small cell lung cancer WP4658	13/96	0.122314	0.999991	0	0	1.49371	3.13854	CDKN2B;LAMA1;MAX;PTGS2;RELA;COL4A4;COL4A3;CKS2;BCL2;CYCS;BIRC7;BIRC3;NFKBIB
ATM Signaling Network in Development and Disease WP3878	7/45	0.131136	0.999991	0	0	1.75559	3.56652	HDAC4;MDC1;RAD50;ATM;TP53BP1;MTOR;ATR
Eicosanoid metabolism via lipooxygenases (LOX) WP4721	5/29	0.135868	0.999991	0	0	1.98493	3.96206	LTB4R2;ACOX1;PPARA;PTGR2;LTB4R
Gastric Cancer Network 1 WP2361	5/29	0.135868	0.999991	0	0	1.98493	3.96206	INO80D;CEP192;GATD3B;GATD3A;E2F7
DNA IR-damage and cellular response via ATR WP4016	11/80	0.13595	0.999991	0	0	1.51993	3.03297	MDC1;FEN1;WRN;RAD50;TOP3A;RPA2;ATM;TP53BP1;BRCA2;MLH1;ATR
DDX1 as a regulatory component of the Drosha microprocessor WP2942	2/7	0.137652	0.999991	0	0	3.80905	7.55345	RAD50;ATM
Kennedy pathway from sphingolipids WP3933	3/14	0.141835	0.999991	0	0	2.59759	5.07332	PCYT2;CHKA;CEPT1
Fatty Acid Biosynthesis WP357	4/22	0.150849	0.999991	0	0	2.11685	4.00397	ACSL1;SCD;FASN;ACACA
Transcription factor regulation in adipogenesis WP3599	4/22	0.150849	0.999991	0	0	2.11685	4.00397	CEBPA;IRS2;PPARG;LPIN1
Autophagy WP4923	5/30	0.151059	0.999991	0	0	1.90543	3.60143	MAP1LC3B;ATG101;AKT1S1;PRKAB1;MTOR
Oligodendrocyte specification and differentiation, leading to myelin components for CNS WP4304	5/30	0.151059	0.999991	0	0	1.90543	3.60143	BMP2;LIF;SOX8;CXCL2;FGF2
One-carbon metabolism WP241	5/30	0.151059	0.999991	0	0	1.90543	3.60143	AHCYL2;ALDH1L1;MTHFR;GLRX;MTR
Thymic Stromal LymphoPoietin (TSLP) Signaling Pathway WP2203	7/47	0.154865	0.999991	0	0	1.66763	3.11046	CXCL8;TSLP;GAB2;RELA;MTOR;PI4K2A;NFKB2
16p11.2 proximal deletion syndrome WP4949	10/74	0.162631	0.999991	0	0	1.48933	2.70503	PAGR1;UNC13A;DOC2A;ASPHD1;KMT2C;QPRT;REL;PPARG;SEZ6L2;ESR1
Cysteine and methionine catabolism WP4504	3/15	0.165429	0.999991	0	0	2.38099	4.2839	GOT1;CTH;MTR
Role of Osx and miRNAs in tooth development WP3971	3/15	0.165429	0.999991	0	0	2.38099	4.2839	NOTCH4;KLF4;DKK1
Trans-sulfuration and one-carbon metabolism WP2525	5/31	0.166921	0.999991	0	0	1.83204	3.27979	AHCYL2;CTH;MTHFD2L;MTHFR;MTR
DNA Mismatch Repair WP531	4/23	0.169715	0.999991	0	0	2.00532	3.55671	LIG1;POLE3;RPA2;MLH1
ApoE and miR-146 in inflammation and atherosclerosis WP3926	2/8	0.172412	0.999991	0	0	3.17404	5.57953	RELA;NFKB2
Caloric restriction and aging WP4191	2/8	0.172412	0.999991	0	0	3.17404	5.57953	NAMPT;MTOR
Canonical NF-KB pathway WP4562	2/8	0.172412	0.999991	0	0	3.17404	5.57953	REL;RELA
HIF1A and PPARG regulation of glycolysis WP2456	2/8	0.172412	0.999991	0	0	3.17404	5.57953	GPAT3;PPARG
Ketogenesis and Ketolysis WP4742	2/8	0.172412	0.999991	0	0	3.17404	5.57953	OXCT1;ACAT1
Pre-implantation embryo WP3527	8/58	0.182697	0.999991	0	0	1.52465	2.59178	ZFP36;IRX5;DDIT3;FOSB;SOX8;E2F5;KLF4;MXD1
Initiation of transcription and translation elongation at the HIV-1 LTR WP3414	5/32	0.183403	0.999991	0	0	1.76409	2.99202	HDAC4;CCNT1;SUPT5H;RELA;NELFE
PPAR signaling pathway WP3942	9/67	0.18343	0.999991	0	0	1.47877	2.50788	FADS2;FABP3;ACSL1;MMP1;ACOX1;SCD;OLR1;PPARG;PPARA
NAD Metabolism in Oncogene-Induced Senescence and Mitochondrial Dysfunction-Associated Senescence WP5046	4/24	0.189349	0.999991	0	0	1.90495	3.17015	MDH1;GOT1;NAMPT;RELA
Photodynamic therapy-induced NFE2L2 (NRF2) survival signaling WP3612	4/24	0.189349	0.999991	0	0	1.90495	3.17015	ABCC4;SRXN1;HMOX1;MAPK13
Triacylglyceride synthesis WP325	4/24	0.189349	0.999991	0	0	1.90495	3.17015	AGPAT5;LIPE;DGAT2;GK
Tryptophan catabolism leading to NAD+ production WP4210	3/16	0.190066	0.999991	0	0	2.19772	3.64905	NMRK1;QPRT;NAMPT
AMP-activated protein kinase (AMPK) signaling WP1403	9/69	0.206563	0.999991	0	0	1.42932	2.25425	LIPE;SREBF1;FASN;TSC1;HMGCR;PRKAB1;ACACA;CAMKK1;MTOR
Eicosanoid metabolism via cytochrome P450 monooxygenases (CYP) pathway WP4720	2/9	0.208363	0.999991	0	0	2.72045	4.26696	PPARG;PPARA
Heme Biosynthesis WP561	2/9	0.208363	0.999991	0	0	2.72045	4.26696	ALAS1;PPOX
Thiamine metabolic pathways WP4297	2/9	0.208363	0.999991	0	0	2.72045	4.26696	TPK1;SLC19A2
Differentiation of white and brown adipocyte WP2895	4/25	0.209656	0.999991	0	0	1.81414	2.83421	CEBPA;BMP2;EBF3;PPARG
One-carbon metabolism and related pathways WP3940	7/52	0.221697	0.999991	0	0	1.48192	2.23244	DMGDH;PCYT2;CHKA;CTH;MTHFR;MTR;CEPT1
Thermogenesis WP4321	13/108	0.225404	0.999991	0	0	1.30417	1.94303	ACSL1;TSC1;PRKAB1;ADCY7;MTOR;MAPK13;LIPE;CREB3;SLC25A29;AKT1S1;DPF3;PPARG;FGF21
Integrated Cancer Pathway WP1971	6/44	0.237194	0.999991	0	0	1.504	2.16407	CDKN2B;RAD50;MMP1;BCL2;ATM;ATR
Leptin and adiponectin WP3934	2/10	0.244963	0.999991	0	0	2.38026	3.34819	PRKAB1;ACACA
Adipogenesis WP236	15/130	0.253139	0.999991	0	0	1.24304	1.7077	SREBF1;CEBPA;LIF;IRS2;KLF15;LIPE;BMP2;SCD;DDIT3;NAMPT;TRIB3;PLIN2;PPARG;PPARA;LPIN1
DNA IR-double strand breaks and cellular response via ATM WP3959	7/55	0.265913	0.999991	0	0	1.38907	1.83995	MDC1;RAD50;NABP2;ATM;TP53BP1;BRCA2;ATR
NAD metabolism, sirtuins and aging WP3630	2/11	0.281765	0.999991	0	0	2.11567	2.67989	NAMPT;PPARG
Nucleotide GPCRs WP80	2/11	0.281765	0.999991	0	0	2.11567	2.67989	ADORA2B;LTB4R
Energy Metabolism WP1541	6/47	0.286989	0.999991	0	0	1.39372	1.73979	MYBBP1A;PPARG;TFB2M;PPRC1;PPARA;PRKAB1
Pathways in clear cell renal cell carcinoma WP4018	10/85	0.287516	0.999991	0	0	1.27012	1.58318	PBRM1;MDH1;FASN;AKT1S1;LDHD;TSC1;SQSTM1;ACACA;KCNJ2;MTOR
Nuclear receptors WP170	5/38	0.292144	0.999991	0	0	1.44287	1.77546	NR4A2;AR;PPARG;PPARA;ESR1
Hereditary leiomyomatosis and renal cell carcinoma pathway WP4206	3/20	0.295199	0.999991	0	0	1.68023	2.05007	SLC11A2;PRKAB1;ACACA
Hypertrophy Model WP516	3/20	0.295199	0.999991	0	0	1.68023	2.05007	NR4A3;IFRD1;ATF3
Lipid Metabolism Pathway WP3965	4/29	0.295701	0.999991	0	0	1.52354	1.85629	LIPE;FASN;PRKAB1;ACACA
Matrix Metalloproteinases WP129	4/30	0.317954	0.999991	0	0	1.46486	1.67851	MMP16;MMP1;MMP15;TIMP4
Alanine and aspartate metabolism WP106	2/12	0.318399	0.999991	0	0	1.904	2.17903	GOT1;ASS1
Biomarkers for urea cycle disorders WP4583	2/12	0.318399	0.999991	0	0	1.904	2.17903	GOT1;ASS1
Bone morphogenic protein (BMP) signaling and regulation WP1425	2/12	0.318399	0.999991	0	0	1.904	2.17903	BMP2;BMPR1B
Host-pathogen interaction of human coronaviruses - apoptosis WP4864	3/21	0.322257	0.999991	0	0	1.5868	1.7969	BCL2L11;BCL2;MAPK13
Selenium Micronutrient Network WP15	10/89	0.338478	0.999991	0	0	1.20554	1.30596	PRDX5;SELENOS;CTH;MTHFR;MTR;GGT1;PTGS2;RELA;SELENOI;NFKB2
Vitamin B12 metabolism WP1533	6/50	0.338717	0.999991	0	0	1.29848	1.40572	MCEE;CTH;MTHFR;MTR;RELA;NFKB2
Base Excision Repair WP4752	4/31	0.340329	0.999991	0	0	1.41053	1.52033	MBD4;FEN1;LIG1;POLE3
Ethanol effects on histone modifications WP3996	4/31	0.340329	0.999991	0	0	1.41053	1.52033	HDAC4;MTHFR;MTR;HDAC6
Toll-like Receptor Signaling related to MyD88 WP3858	4/31	0.340329	0.999991	0	0	1.41053	1.52033	REL;TLR6;RELA;NFKB2
Glucocorticoid Receptor Pathway WP2880	8/70	0.347479	0.999991	0	0	1.22874	1.29884	TGFBR3;ARL5B;B3GNT5;PTGS2;BIRC3;SLC19A2;NFKB2;CPEB4
FGF23 signaling in hypophosphatemic rickets and related disorders WP4790	3/22	0.349322	0.999991	0	0	1.5032	1.58101	CYP27B1;GALNT3;NFKB2
NAD+ biosynthetic pathways WP3645	3/22	0.349322	0.999991	0	0	1.5032	1.58101	TNKS;QPRT;NAMPT
PI3K/AKT/mTOR - VitD3 signaling WP4141	3/22	0.349322	0.999991	0	0	1.5032	1.58101	TSC1;RELA;MTOR
Apoptosis Modulation and Signaling WP1772	10/90	0.351477	0.999991	0	0	1.19041	1.2447	HRK;BCL2L11;PTRH2;BCL2;XIAP;CYCS;BIRC6;TNFRSF10A;BIRC7;BIRC3
DNA Repair Pathways Full Network WP4946	13/120	0.353379	0.999991	0	0	1.15713	1.20366	MBD4;FEN1;LIG1;RPA2;BRCA2;MLH1;WRN;RAD50;POLE3;ATM;ERCC5;FAN1;ATR
Genes targeted by miRNAs in adipocytes WP1992	2/13	0.354564	0.999991	0	0	1.73081	1.79462	HDAC4;KCNJ2
Neuroinflammation WP4919	2/13	0.354564	0.999991	0	0	1.73081	1.79462	RELA;MTOR
Integrated breast cancer pathway WP1984	16/152	0.373111	0.999991	0	0	1.12045	1.10463	RALA;MAX;MMP1;MYCBP2;TSC1;HMGCR;BRCA2;ESR1;MTOR;DHTKD1;AR;RAD50;BCL2;ATM;MAP3K13;ATR
Ebstein-Barr virus LMP1 signaling WP262	3/23	0.376263	0.999991	0	0	1.42796	1.39579	CXCL8;RELA;NFKB2
NRF2-ARE regulation WP4357	3/23	0.376263	0.999991	0	0	1.42796	1.39579	HMOX1;PGAM5;SLC7A11
Fluoropyrimidine Activity WP1601	4/33	0.385133	0.999991	0	0	1.31311	1.25292	ABCC4;PPAT;MTHFR;UPP1
miRNA regulation of prostate cancer signaling pathways WP3981	4/33	0.385133	0.999991	0	0	1.31311	1.25292	AR;TCF7;BCL2;MTOR
Purinergic signaling WP4900	4/33	0.385133	0.999991	0	0	1.31311	1.25292	P2RX7;P2RY11;ADORA2B;P2RX1
Eukaryotic Transcription Initiation WP405	5/43	0.389335	0.999991	0	0	1.25267	1.18166	TAF13;POLR1B;TAF9;POLR3E;TAF5
Lung fibrosis WP3624	7/63	0.392065	0.999991	0	0	1.19011	1.11433	MT2A;CXCL8;DPP9;HMOX1;ATP11A;CXCL2;FGF2
Chromosomal and microsatellite instability in colorectal cancer WP4216	8/73	0.392079	0.999991	0	0	1.17183	1.09718	RALA;BCL2L11;TCF7;BCL2;REL;CYCS;PTGS2;MLH1
Mitochondrial fatty acid synthesis pathway WP4317	1/5	0.393291	0.999991	0	0	2.37954	2.2206	ACACA
Sulindac Metabolic Pathway WP2542	1/5	0.393291	0.999991	0	0	2.37954	2.2206	CYP1B1
Breast cancer pathway WP4262	16/154	0.393509	0.999991	0	0	1.10409	1.02973	JAG2;CSNK2A1;FZD5;CSNK2A3;NOTCH4;TCF7;BRCA2;FGF2;ESR1;MTOR;NFKB2;RAD50;HEY1;ATM;FGF21;ATR
Nuclear Receptors Meta-Pathway WP2882	32/319	0.402227	0.999991	0	0	1.06198	0.967183	ALAS1;SRXN1;MGST1;IRS2;SLC7A11;PTGS2;SLC5A3;ARL5B;FTH1;CYP1B1;HMOX1;SLC39A8;GGT1;IP6K3;SLC19A2;SREBF1;ABCC4;SLC6A16;NRG1;ESR1;NFKB2;TGFBR3;ACOX1;SCD;FASN;B3GNT5;MAFG;PPARA;SQSTM1;CPEB4;FTL;BIRC3
7q11.23 copy number variation syndrome WP4932	11/104	0.402372	0.999991	0	0	1.12619	1.02526	UBIAD1;CLDN3;MYBBP1A;EIF2AK3;DDX21;NRG1;CLDN1;SQSTM1;ACACA;HDAC6;ATP5MC1
Urea cycle and associated pathways WP4595	3/24	0.402965	0.999991	0	0	1.35989	1.23601	MDH1;GOT1;ASS1
Fatty acid beta-oxidation WP143	4/34	0.407416	0.999991	0	0	1.26927	1.1397	LIPE;GK;ACSL1;ACAT1
Major receptors targeted by epinephrine and norepinephrine WP4589	2/15	0.424571	0.999991	0	0	1.46437	1.25449	ADRA2C;ADCY7
Phytochemical activity on NRF2 transcriptional activation WP3	2/15	0.424571	0.999991	0	0	1.46437	1.25449	HMOX1;SLC7A11
Regulation of sister chromatid separation at the metaphase-anaphase transition WP4240	2/15	0.424571	0.999991	0	0	1.46437	1.25449	STAG1;ESPL1
IL-1 signaling pathway WP195	6/55	0.426369	0.999991	0	0	1.16565	0.993662	IRAK2;REL;IRAK3;SQSTM1;RELA;NFKBIB
RANKL/RANK signaling pathway WP2018	6/55	0.426369	0.999991	0	0	1.16565	0.993662	ACP5;GAB2;SQSTM1;RELA;MTOR;NFKB2
Prostaglandin Synthesis and Regulation WP98	5/45	0.428257	0.999991	0	0	1.18991	1.00908	ABCC4;ANXA3;AKR1C1;PPARG;PTGS2
MTHFR deficiency WP4288	3/25	0.429325	0.999991	0	0	1.298	1.09752	CHKA;MTHFR;CYCS
Relationship between inflammation, COX-2 and EGFR WP4483	3/25	0.429325	0.999991	0	0	1.298	1.09752	MMP1;PTGS2;ESR1
The influence of laminopathies on Wnt signaling WP4844	4/35	0.429533	0.999991	0	0	1.22825	1.03794	CEBPA;SREBF1;TCF7;PPARG
Aryl Hydrocarbon Receptor Netpath WP2586	5/46	0.447541	0.999991	0	0	1.16082	0.933282	CYP1B1;PTGS2;ESR1;RELA;FGF21
Oxysterols derived from cholesterol WP4545	5/46	0.447541	0.999991	0	0	1.16082	0.933282	CH25H;INSIG1;ACOT11;DHCR7;ESR1
Amino Acid Metabolism Pathway Excerpt (Histidine catabolism extension) WP4661	1/6	0.451003	0.999991	0	0	1.90352	1.51574	GPT2
let-7 inhibition of ES cell reprogramming WP3299	1/6	0.451003	0.999991	0	0	1.90352	1.51574	KLF4
MED and Pseudoachondroplasia genes WP4789	1/6	0.451003	0.999991	0	0	1.90352	1.51574	MATN1
Robo4 and VEGF Signaling Pathways Crosstalk WP3943	1/6	0.451003	0.999991	0	0	1.90352	1.51574	ROBO4
Somatroph axis (GH) and its relationship to dietary restriction and aging WP4186	1/6	0.451003	0.999991	0	0	1.90352	1.51574	MTOR
p53 transcriptional gene network WP4963	7/67	0.456153	0.999991	0	0	1.11052	0.871675	ADORA2B;FUCA1;LIF;ERCC5;SLC7A11;MLH1;PRKAB1
ID signaling pathway WP53	2/16	0.458072	0.999991	0	0	1.3597	1.06156	SREBF1;PAX8
TCA Cycle and Deficiency of Pyruvate Dehydrogenase complex (PDHc) WP2453	2/16	0.458072	0.999991	0	0	1.3597	1.06156	MDH1;IDH1
NO/cGMP/PKG mediated Neuroprotection WP4008	5/47	0.466655	0.999991	0	0	1.13312	0.863623	AKAP9;BCL2;XIAP;CYCS;RELA
Factors and pathways affecting insulin-like growth factor (IGF1)-Akt signaling WP3850	4/37	0.473034	0.999991	0	0	1.15369	0.863635	AKT1S1;PRKAB1;ACVR2B;MTOR
miRNAs involvement in the immune response in sepsis WP4329	4/37	0.473034	0.999991	0	0	1.15369	0.863635	CXCL8;REL;RELA;NFKB2
Neovascularisation processes WP4331	4/37	0.473034	0.999991	0	0	1.15369	0.863635	NOTCH4;REL;RELA;NFKB2
1q21.1 copy number variation syndrome WP4905	3/27	0.480672	0.999991	0	0	1.18971	0.871542	AFDN;OCLN;PRKAB1
7-oxo-C and 7beta-HC pathways WP5064	3/27	0.480672	0.999991	0	0	1.18971	0.871542	NPC1;ACOT11;DHCR7
Canonical and non-canonical Notch signaling WP3845	3/27	0.480672	0.999991	0	0	1.18971	0.871542	JAG2;HEY1;NOTCH4
Eicosanoid Synthesis WP167	3/27	0.480672	0.999991	0	0	1.18971	0.871542	PNPLA8;PTGS2;GGT1
FGFR3 signaling in chondrocyte proliferation and terminal differentiation WP4767	3/27	0.480672	0.999991	0	0	1.18971	0.871542	BMP2;PTHLH;MAPK13
Folate Metabolism WP176	7/69	0.487716	0.999991	0	0	1.07458	0.77157	SLC46A1;CTH;MTHFR;MTR;FOLR3;RELA;NFKB2
Amyotrophic lateral sclerosis (ALS) WP2447	4/38	0.494315	0.999991	0	0	1.11969	0.788915	TOMM40;DERL1;BCL2;PRPH
Parkinson's disease pathway WP2371	4/38	0.494315	0.999991	0	0	1.11969	0.788915	TH;LRRK2;CYCS;MAPK13
Acetylcholine Synthesis WP528	1/7	0.503228	0.999991	0	0	1.58618	1.08925	CHKA
Activation of NLRP3 Inflammasome by SARS-CoV-2 WP4876	1/7	0.503228	0.999991	0	0	1.58618	1.08925	RELA
Cholesterol Biosynthesis with Skeletal Dysplasias WP4804	1/7	0.503228	0.999991	0	0	1.58618	1.08925	DHCR7
Disorders of the Krebs cycle WP4236	1/7	0.503228	0.999991	0	0	1.58618	1.08925	DHTKD1
LDLRAD4 and what we know about it WP4904	1/7	0.503228	0.999991	0	0	1.58618	1.08925	NEDD4
MicroRNA for Targeting Cancer Growth and Vascularization in Glioblastoma WP3593	1/7	0.503228	0.999991	0	0	1.58618	1.08925	HEY1
SARS-CoV-2 and angiotensin-converting enzyme 2 receptor: molecular mechanisms WP4883	1/7	0.503228	0.999991	0	0	1.58618	1.08925	ACE
Novel intracellular components of RIG-I-like receptor (RLR) pathway WP3865	6/60	0.512105	0.999991	0	0	1.05743	0.70766	CYLD;SIKE1;CXCL8;RELA;MAPK13;NFKBIB
4-hydroxytamoxifen, Dexamethasone, and Retinoic Acids Regulation of p27 Expression WP3879	2/18	0.521499	0.999991	0	0	1.18961	0.774489	TSC1;MTOR
Fatty acid transporters WP5061	2/18	0.521499	0.999991	0	0	1.18961	0.774489	FABP3;ACSL1
Simplified Interaction Map Between LOXL4 and Oxidative Stress Pathway WP3670	2/18	0.521499	0.999991	0	0	1.18961	0.774489	BMP2;EXOC6
Gastrin signaling pathway WP4659	11/114	0.526428	0.999991	0	0	1.01629	0.65209	BMP2;CXCL8;ARHGEF28;PPARG;PTGS2;KLF4;CLDN1;LAMTOR3;RELA;MTOR;BIRC3
Male infertility WP4673	14/146	0.528344	0.999991	0	0	1.00926	0.643916	NANOS1;SLC46A1;CCNT1;CXXC1;MTHFR;MTR;BRCA2;MLH1;ESR1;AR;SPATA17;BCL2;TSSK6;ATM
Statin inhibition of cholesterol production WP430	3/29	0.529723	0.999991	0	0	1.09807	0.697713	SQLE;APOA4;HMGCR
ATM Signaling Pathway WP2516	4/40	0.535721	0.999991	0	0	1.05737	0.659949	MDC1;RAD50;ATM;TP53BP1
Oxidative Damage WP3941	4/40	0.535721	0.999991	0	0	1.05737	0.659949	C5AR1;BCL2;CYCS;MAPK13
Senescence and Autophagy in Cancer WP615	10/105	0.546773	0.999991	0	0	1.00161	0.604695	BMP2;MAP1LC3B;CXCL8;KMT2A;CREG1;AKT1S1;BCL2;COL10A1;SQSTM1;MTOR
FTO Obesity Variant Mechanism WP3407	1/8	0.550488	0.999991	0	0	1.35951	0.81156	IRX5
Insulin signaling in adipocytes (diabetic condition) WP3635	1/8	0.550488	0.999991	0	0	1.35951	0.81156	MTOR
Insulin signaling in adipocytes (normal condition) WP3634	1/8	0.550488	0.999991	0	0	1.35951	0.81156	MTOR
NAD Biosynthesis II (from tryptophan) WP2485	1/8	0.550488	0.999991	0	0	1.35951	0.81156	QPRT
TFs regulate miRNAs related to cardiac hypertrophy WP1559	1/8	0.550488	0.999991	0	0	1.35951	0.81156	MYEF2
15q13.3 copy number variation syndrome WP4942	2/19	0.551289	0.999991	0	0	1.11957	0.666697	KLF13;FAN1
Farnesoid X receptor pathway WP2879	2/19	0.551289	0.999991	0	0	1.11957	0.666697	IRS2;IP6K3
Host-pathogen interaction of human coronaviruses - autophagy WP4863	2/19	0.551289	0.999991	0	0	1.11957	0.666697	ATG16L2;MTOR
TP53 network WP1742	2/19	0.551289	0.999991	0	0	1.11957	0.666697	BCL2;ATM
Apoptosis WP254	8/84	0.552641	0.999991	0	0	1.00161	0.594002	HRK;BCL2L11;BCL2;XIAP;CYCS;RELA;BIRC3;NFKBIB
Eicosanoid metabolism via cyclooxygenases (COX) WP4719	3/30	0.553253	0.999991	0	0	1.05734	0.625881	ACOX1;PTGS2;PTGR2
Nucleotide-binding Oligomerization Domain (NOD) pathway WP1433	4/41	0.555773	0.999991	0	0	1.02874	0.604275	XIAP;NOD2;NLRP1;RELA
Vitamin D-sensitive calcium signaling in depression WP4698	4/41	0.555773	0.999991	0	0	1.02874	0.604275	KDM6B;CYP27B1;BCL2;GGT1
Thyroid hormones production and their peripheral downstream signaling effects WP4746	9/95	0.556023	0.999991	0	0	0.995762	0.584458	PFKFB2;CREB3;NHSL1;PAX8;AKT1S1;TSC1;PPARG;MTOR;FGF21
Wnt Signaling Pathway WP363	5/52	0.558461	0.999991	0	0	1.01229	0.589731	GCKR;TSC1;PPARG;PI4K2A;MTOR
Osteoblast differentiation WP4787	11/118	0.573905	0.999991	0	0	0.978076	0.543117	JAG2;BMP2;FZD5;HEY1;NOTCH4;PPARG;BMPR1B;PIK3C2A;FGF2;HES2;MAPK13
Splicing factor NOVA regulated synaptic proteins WP4148	4/42	0.57535	0.999991	0	0	1.00161	0.553665	EPB41;STXBP2;EPB41L3;NCDN
TNF related weak inducer of apoptosis (TWEAK) Signaling Pathway WP2036	4/42	0.57535	0.999991	0	0	1.00161	0.553665	RELA;NFKB2;NFKBIB;BIRC3
Apoptosis-related network due to altered Notch3 in ovarian cancer WP2864	5/53	0.575872	0.999991	0	0	0.991148	0.546984	ERN1;HSPA5;NRG1;CARD14;SQSTM1
G1 to S cell cycle control WP45	6/64	0.577003	0.999991	0	0	0.984286	0.541267	CREB3;CDKN2B;ORC6;ORC1;RPA2;ATM
Hematopoietic Stem Cell Gene Regulation by GABP alpha/beta Complex WP3657	2/20	0.579744	0.999991	0	0	1.05731	0.576413	BCL2;ATM
Imatinib and Chronic Myeloid Leukemia WP3640	2/20	0.579744	0.999991	0	0	1.05731	0.576413	SPRED2;GAB2
Nanomaterial induced apoptosis WP2507	2/20	0.579744	0.999991	0	0	1.05731	0.576413	BCL2;CYCS
Pathways affected in adenoid cystic carcinoma WP3651	6/65	0.592542	0.999991	0	0	0.96755	0.506352	KDM6B;CEBPA;MAX;KMT2C;MGA;ATM
Interferon type I signaling pathways WP585	5/54	0.592914	0.999991	0	0	0.970867	0.507478	RPS6KA5;REL;IRS2;GAB2;MTOR
15q11.2 copy number variation syndrome WP4940	1/9	0.593253	0.999991	0	0	1.18951	0.621081	TUBGCP5
ATR Signaling WP3875	1/9	0.593253	0.999991	0	0	1.18951	0.621081	ATR
Biotin Metabolism (including IEMs) WP5031	1/9	0.593253	0.999991	0	0	1.18951	0.621081	ACACA
Cytosine methylation WP3585	1/9	0.593253	0.999991	0	0	1.18951	0.621081	IDH1
Macrophage markers WP4146	1/9	0.593253	0.999991	0	0	1.18951	0.621081	CD68
Methylation Pathways WP704	1/9	0.593253	0.999991	0	0	1.18951	0.621081	TPMT
NLR Proteins WP288	1/9	0.593253	0.999991	0	0	1.18951	0.621081	RELA
Role of Altered Glycolysation of MUC1 in Tumour Microenvironment WP4480	1/9	0.593253	0.999991	0	0	1.18951	0.621081	RELA
Supression of HMGB1 mediated inflammation by THBD WP4479	1/9	0.593253	0.999991	0	0	1.18951	0.621081	RELA
Urea cycle and related diseases WP4571	1/9	0.593253	0.999991	0	0	1.18951	0.621081	ASS1
Ovarian infertility WP34	3/32	0.598134	0.999991	0	0	0.984311	0.505877	ATM;MLH1;BMPR1B
SARS-CoV-2 mitochondrial interactions WP5038	3/32	0.598134	0.999991	0	0	0.984311	0.505877	ACE;ACAD9;NFKB2
Galanin receptor pathway WP4970	2/21	0.606847	0.999991	0	0	1.00161	0.500281	BCL2L11;PPARG
Urea cycle and metabolism of amino groups WP497	2/21	0.606847	0.999991	0	0	1.00161	0.500281	ARG2;ASS1
Angiopoietin Like Protein 8 Regulatory Pathway WP3915	12/132	0.609011	0.999991	0	0	0.951217	0.471727	SREBF1;RPS6KA5;SCD;FASN;IRS2;CBLB;TSC1;MAP3K13;PIK3C2A;PRKAB1;MTOR;MAPK13
Pathogenic Escherichia coli infection WP2272	5/55	0.609568	0.999991	0	0	0.951397	0.470945	OCLN;HCLS1;LY96;CLDN1;TUBA4A
The Overlap Between Signal Transduction Pathways that Contribute to a Range of LMNA Laminopathies WP4879	5/55	0.609568	0.999991	0	0	0.951397	0.470945	SREBF1;CEBPA;BMP2;TCF7;PPARG
Nucleotide Excision Repair WP4753	4/44	0.612988	0.999991	0	0	0.951423	0.465636	LIG1;POLE3;RPA2;ERCC5
Alpha 6 Beta 4 signaling pathway WP244	3/33	0.619434	0.999991	0	0	0.951448	0.455695	LAMA1;IRS2;MTOR
Nuclear Receptors in Lipid Metabolism and Toxicity WP299	3/33	0.619434	0.999991	0	0	0.951448	0.455695	CYP27B1;PPARG;PPARA
Oxidative Stress WP408	3/33	0.619434	0.999991	0	0	0.951448	0.455695	MGST1;HMOX1;MT1X
Prion disease pathway WP3995	3/33	0.619434	0.999991	0	0	0.951448	0.455695	PRNP;HSPA5;BCL2
Regucalcin in proximal tubule epithelial kidney cells WP4838	3/33	0.619434	0.999991	0	0	0.951448	0.455695	SEC16B;RELA;MTOR
Signal transduction through IL1R WP4496	3/33	0.619434	0.999991	0	0	0.951448	0.455695	IRAK2;IRAK3;RELA
Type I collagen synthesis in the context of Osteogenesis imperfecta WP4786	3/33	0.619434	0.999991	0	0	0.951448	0.455695	MIA3;P4HB;TMEM38B
Regulatory circuits of the STAT3 signaling pathway WP4538	7/78	0.620803	0.999991	0	0	0.937894	0.447133	SETD7;AKT1S1;IL20RB;CSF2RB;MTOR;MAPK13;F2RL3
Nonalcoholic fatty liver disease WP4396	14/155	0.620896	0.999991	0	0	0.944367	0.450078	SREBF1;CEBPA;CXCL8;EIF2AK3;IRS2;PRKAB1;RELA;ERN1;BCL2L11;DDIT3;CYCS;NDUFS1;NDUFV3;PPARA
Histone Modifications WP2369	6/67	0.622688	0.999991	0	0	0.935723	0.443262	KMT2A;KMT5C;SMYD5;KMT2C;SETD7;SETDB2
Mitochondrial complex I assembly model OXPHOS system WP4324	5/56	0.625821	0.999991	0	0	0.93269	0.437144	ACAD9;NDUFAF2;NDUFS1;NDUFV3;FOXRED1
Glycolysis and Gluconeogenesis WP534	4/45	0.63101	0.999991	0	0	0.928166	0.427359	MDH1;GOT1;MPC1;PGAM2
Degradation pathway of sphingolipids, including diseases WP4153	1/10	0.631952	0.999991	0	0	1.05728	0.485229	NEU1
Ethanol metabolism resulting in production of ROS by CYP2E1 WP4269	1/10	0.631952	0.999991	0	0	1.05728	0.485229	MAFG
Gamma-glutamyl cycle for the biosynthesis and degradation of glutathione, including diseases WP4518	1/10	0.631952	0.999991	0	0	1.05728	0.485229	GGT1
Interleukin-1 Induced Activation of NF-kappa-B WP3656	1/10	0.631952	0.999991	0	0	1.05728	0.485229	SQSTM1
Non-homologous end joining WP438	1/10	0.631952	0.999991	0	0	1.05728	0.485229	WRN
SARS-CoV-2 and COVID-19 Pathway WP4846	1/10	0.631952	0.999991	0	0	1.05728	0.485229	ACAT1
Steroid Biosynthesis WP496	1/10	0.631952	0.999991	0	0	1.05728	0.485229	HSD17B7
Glycerolipids and Glycerophospholipids WP4722	2/22	0.6326	0.999991	0	0	0.951474	0.435696	DGAT2;PCYT2
Purine metabolism and related disorders WP4224	2/22	0.6326	0.999991	0	0	0.951474	0.435696	TPMT;PPAT
Regulation of apoptosis by parathyroid hormone-related protein WP3872	2/22	0.6326	0.999991	0	0	0.951474	0.435696	BCL2;PTHLH
STING pathway in Kawasaki-like disease and COVID-19 WP4961	2/22	0.6326	0.999991	0	0	0.951474	0.435696	REL;RELA
Type II diabetes mellitus WP1584	2/22	0.6326	0.999991	0	0	0.951474	0.435696	GK;MTOR
BDNF-TrkB Signaling WP3676	3/34	0.639952	0.999991	0	0	0.920705	0.410968	TSC1;GAB2;MTOR
p38 MAPK Signaling Pathway WP400	3/34	0.639952	0.999991	0	0	0.920705	0.410968	RPS6KA5;MAX;DDIT3
NRF2 pathway WP2884	13/146	0.640286	0.999991	0	0	0.92958	0.414445	ABCC4;SRXN1;SLC6A16;NRG1;SLC7A11;SLC5A3;FTH1;MAFG;HMOX1;SLC39A8;GGT1;SQSTM1;FTL
Amino Acid metabolism WP3925	8/91	0.64501	0.999991	0	0	0.916782	0.402	ARG2;MDH1;GOT1;TH;GPT2;IDH1;CTH;ASS1
Estrogen signaling pathway WP712	2/23	0.657013	0.999991	0	0	0.906115	0.380615	BCL2;ESR1
Glutathione metabolism WP100	2/23	0.657013	0.999991	0	0	0.906115	0.380615	IDH1;GGT1
Nanoparticle triggered autophagic cell death WP2509	2/23	0.657013	0.999991	0	0	0.906115	0.380615	BCL2;TSC1
Parkin-Ubiquitin Proteasomal System pathway WP2359	6/70	0.665409	0.999991	0	0	0.891713	0.363242	HSPA9;PSMD12;HSPA5;PSMC4;TUBA4A;HSPA1B
SRF and miRs in Smooth Muscle Differentiation and Proliferation WP1991	1/11	0.666971	0.999991	0	0	0.951499	0.385365	KLF4
Corticotropin-releasing hormone signaling pathway WP2355	8/93	0.6693	0.999991	0	0	0.895111	0.359407	ERN1;NR4A2;CXCL8;BCL2;FOSB;RAPGEF3;ACACA;RELA
Glioblastoma signaling pathways WP2261	7/82	0.67341	0.999991	0	0	0.887676	0.350988	CDKN2B;SPRY2;TSC1;ATM;FOXO4;BRCA2;PIK3C2A
Host-pathogen interaction of human coronaviruses - MAPK signaling WP4877	3/36	0.678611	0.999991	0	0	0.864809	0.335293	DDIT3;BCL2;MAPK13
Hepatitis C and Hepatocellular Carcinoma WP3646	4/49	0.697526	0.999991	0	0	0.845475	0.304553	CXCL8;MMP1;PTGS2;BIRC3
IL-3 signaling pathway WP286	4/49	0.697526	0.999991	0	0	0.845475	0.304553	CXCL8;BCL2;CSF2RB;GAB2
Structural Pathway of Interleukin 1 (IL-1) WP2637	4/49	0.697526	0.999991	0	0	0.845475	0.304553	RPS6KA5;IRAK2;RELA;NFKBIB
Computational Model of Aerobic Glycolysis WP4629	1/12	0.698659	0.999991	0	0	0.864951	0.310165	PGAM2
IL-10 Anti-inflammatory Signaling Pathway WP4495	1/12	0.698659	0.999991	0	0	0.864951	0.310165	HMOX1
Nanoparticle triggered regulated necrosis WP2513	1/12	0.698659	0.999991	0	0	0.864951	0.310165	FTL
RalA downstream regulated genes WP2290	1/12	0.698659	0.999991	0	0	0.864951	0.310165	RALA
22q11.2 copy number variation syndrome WP4657	11/131	0.711586	0.999991	0	0	0.871488	0.296532	RTN4R;SREBF1;CLDN3;RTL10;THAP7;NPRL2;BCL2;TRMT2A;GNB1L;CDH15;CLDN1
EPO Receptor Signaling WP581	2/26	0.72247	0.999991	0	0	0.792719	0.257696	IRS2;EPOR
Dopamine metabolism WP2436	1/13	0.727334	0.999991	0	0	0.792828	0.252412	TH
EDA signaling in hair follicle development WP3930	1/13	0.727334	0.999991	0	0	0.792828	0.252412	DKK1
Irinotecan pathway WP229	1/13	0.727334	0.999991	0	0	0.792828	0.252412	NPC1
Mammary gland development pathway - Puberty (Stage 2 of 4) WP2814	1/13	0.727334	0.999991	0	0	0.792828	0.252412	ESR1
ncRNAs involved in STAT3 signaling in hepatocellular carcinoma WP4337	1/13	0.727334	0.999991	0	0	0.792828	0.252412	RELA
NO metabolism in cystic fibrosis WP4947	1/13	0.727334	0.999991	0	0	0.792828	0.252412	PRMT5
Osteopontin Signaling WP1434	1/13	0.727334	0.999991	0	0	0.792828	0.252412	RELA
Vitamin B12 Disorders WP4271	1/13	0.727334	0.999991	0	0	0.792828	0.252412	MTR
Synaptic Vesicle Pathway WP2267	4/51	0.727377	0.999991	0	0	0.809407	0.257642	NAPA;UNC13A;STX3;CLN8
Genotoxicity pathway WP4286	5/63	0.727544	0.999991	0	0	0.819806	0.260764	GXYLT1;CCP110;CBLB;PRKAB1;E2F7
Endochondral Ossification with Skeletal Dysplasias WP4808	5/64	0.740302	0.999991	0	0	0.805867	0.242322	HDAC4;HMGCS1;COL10A1;FGF2;PTHLH
Endochondral Ossification WP474	5/64	0.740302	0.999991	0	0	0.805867	0.242322	HDAC4;HMGCS1;COL10A1;FGF2;PTHLH
Bladder cancer WP2828	3/40	0.746482	0.999991	0	0	0.771146	0.22547	CXCL8;RPS6KA5;MMP1
Glycogen Synthesis and Degradation WP500	3/40	0.746482	0.999991	0	0	0.771146	0.22547	HKDC1;PHKG2;PHKA1
H19 action Rb-E2F1 signaling and CDK-Beta-catenin activity WP3969	1/14	0.753281	0.999991	0	0	0.731801	0.207331	TULP3
Riboflavin and CoQ disorders WP5037	1/14	0.753281	0.999991	0	0	0.731801	0.207331	COQ9
Somatic sex determination WP4814	1/14	0.753281	0.999991	0	0	0.731801	0.207331	SOX8
Phosphodiesterases in neuronal function WP4222	4/53	0.754971	0.999991	0	0	0.776284	0.218195	PDE12;PDE4D;PDE8A;ADCY7
Interactions between immune cells and microRNAs in tumor microenvironment WP4559	2/28	0.759991	0.999991	0	0	0.73166	0.200803	CD274;NFKB2
TLR4 Signaling and Tolerance WP3851	2/28	0.759991	0.999991	0	0	0.73166	0.200803	CXCL8;IRAK3
Fibrin Complement Receptor 3 Signaling Pathway WP4136	3/41	0.761538	0.999991	0	0	0.750811	0.204532	IRAK2;LY96;CBLB
Epithelial to mesenchymal transition in colorectal cancer WP4239	13/160	0.763673	0.999991	0	0	0.840394	0.226583	JAG2;FZD5;GDF15;NOTCH4;CLDN1;MAPK13;OCLN;CLDN3;CLDN15;MMP15;COL4A4;COL4A3;CLDN12
IL-4 signaling pathway WP395	4/54	0.767935	0.999991	0	0	0.760717	0.200867	CEBPA;IRS2;GAB2;RELA
Ectoderm Differentiation WP2858	11/138	0.772708	0.999991	0	0	0.823132	0.212248	AHI1;ABCC4;GRAMD1B;PTPRB;FZD5;C1GALT1;SPRY2;MZF1;EDA2R;HDAC6;CDON
DNA Replication WP466	3/42	0.77586	0.999991	0	0	0.731519	0.185647	ORC6;ORC1;RPA2
Biogenic Amine Synthesis WP550	1/15	0.776761	0.999991	0	0	0.679492	0.171655	TH
Biomarkers for pyrimidine metabolism disorders WP4584	1/15	0.776761	0.999991	0	0	0.679492	0.171655	PUS1
COVID-19 adverse outcome pathway WP4891	1/15	0.776761	0.999991	0	0	0.679492	0.171655	CXCL8
ERK Pathway in Huntington's Disease WP3853	1/15	0.776761	0.999991	0	0	0.679492	0.171655	RPS6KA5
miRNAs involved in DNA damage response WP1545	1/15	0.776761	0.999991	0	0	0.679492	0.171655	ATM
Cannabinoid receptor signaling WP3869	2/29	0.777048	0.999991	0	0	0.704522	0.177718	ADCY7;MAPK13
RAS and bradykinin pathways in COVID-19 WP4969	2/29	0.777048	0.999991	0	0	0.704522	0.177718	ACE;F12
EGF/EGFR signaling pathway WP437	13/162	0.778661	0.999991	0	0	0.829021	0.207404	PTPRR;RALA;CBLB;FOXO4;STAM;GAB2;MTOR;RPS6KA5;SYNJ1;NEDD4;SPRY2;FOSB;ARHGEF1
Cardiac Hypertrophic Response WP2795	4/55	0.780356	0.999991	0	0	0.745759	0.184952	HDAC4;NRG1;FGF2;MTOR
DNA damage response WP707	5/68	0.786927	0.999991	0	0	0.754533	0.180801	RAD50;RPA2;CYCS;ATM;ATR
G Protein Signaling Pathways WP35	7/93	0.792844	0.999991	0	0	0.773664	0.17959	AKAP11;GNAL;PDE4D;AKAP9;ARHGEF1;PDE8A;ADCY7
Dopaminergic Neurogenesis WP2855	2/30	0.793033	0.999991	0	0	0.679323	0.157528	NR4A2;TH
Extracellular vesicle-mediated signaling in recipient cells WP2870	2/30	0.793033	0.999991	0	0	0.679323	0.157528	TGFBR3;MTOR
PI3K-AKT-mTOR signaling pathway and therapeutic opportunities WP3844	2/30	0.793033	0.999991	0	0	0.679323	0.157528	FOXO4;MTOR
Sphingolipid pathway WP1422	2/30	0.793033	0.999991	0	0	0.679323	0.157528	ASAH2;KDSR
Endoderm differentiation WP2853	11/141	0.795918	0.999991	0	0	0.804003	0.183521	DUSP4;SFMBT1;TCF7;NABP2;TAF4B;PAF1;TAF5;DKK1;EMSY;ACACA;PTHLH
Deregulation of Rab and Rab Effector Genes in Bladder Cancer WP2291	1/16	0.798006	0.999991	0	0	0.634157	0.14309	RAB27B
NAD+ metabolism WP3644	1/16	0.798006	0.999991	0	0	0.634157	0.14309	NAMPT
Osteoclast Signaling WP12	1/16	0.798006	0.999991	0	0	0.634157	0.14309	ACP5
Pathways of nucleic acid metabolism and innate immune sensing WP4705	1/16	0.798006	0.999991	0	0	0.634157	0.14309	TREX1
Hedgehog Signaling Pathway WP4249	3/44	0.802381	0.999991	0	0	0.695758	0.153187	FBXL17;BCL2;CDON
Proximal tubule transport WP4917	4/57	0.803608	0.999991	0	0	0.717538	0.156885	ABCC4;ATP6V0B;SLC7A8;ATP6V1C1
16p11.2 distal deletion syndrome WP4950	2/31	0.807997	0.999991	0	0	0.655862	0.139828	SPNS1;LAT
Gastric Cancer Network 2 WP2363	2/31	0.807997	0.999991	0	0	0.655862	0.139828	AHCTF1;BRIX1
Alzheimer's disease WP2059	6/83	0.813009	0.999991	0	0	0.74063	0.15332	ERN1;ADAM17;MME;EIF2AK3;CYCS;ATF6
Complement and Coagulation Cascades WP558	4/58	0.814463	0.999991	0	0	0.704211	0.144523	PROS1;F12;C5AR1;CD55
Notch Signaling WP268	3/45	0.814621	0.999991	0	0	0.679154	0.139248	JAG2;ADAM17;NOTCH4
Cell cycle WP179	9/120	0.816711	0.999991	0	0	0.77042	0.155987	STAG1;CDKN2B;ORC6;ORC1;ESPL1;ATM;E2F5;ANAPC10;ATR
ACE Inhibitor Pathway WP554	1/17	0.817231	0.999991	0	0	0.59449	0.119988	ACE
Amplification and Expansion of Oncogenic Pathways as Metastatic Traits WP3678	1/17	0.817231	0.999991	0	0	0.59449	0.119988	TCF7
Cells and molecules involved in local acute inflammatory response WP4493	1/17	0.817231	0.999991	0	0	0.59449	0.119988	CXCL8
Drug Induction of Bile Acid Pathway WP2289	1/17	0.817231	0.999991	0	0	0.59449	0.119988	ABCC4
Glycosaminoglycan degradation WP4815	1/17	0.817231	0.999991	0	0	0.59449	0.119988	HYAL1
Leptin Insulin Overlap WP3935	1/17	0.817231	0.999991	0	0	0.59449	0.119988	IRS2
Mitochondrial LC-Fatty Acid Beta-Oxidation WP368	1/17	0.817231	0.999991	0	0	0.59449	0.119988	ACSL1
NOTCH1 regulation of endothelial cell calcification WP3413	1/17	0.817231	0.999991	0	0	0.59449	0.119988	JAG2
Regulation of Wnt/B-catenin Signaling by Small Molecule Compounds WP3664	1/17	0.817231	0.999991	0	0	0.59449	0.119988	TNKS
miRNA regulation of DNA damage response WP1530	5/71	0.817419	0.999991	0	0	0.720116	0.145178	RAD50;RPA2;CYCS;ATM;ATR
Non-genomic actions of 1,25 dihydroxyvitamin D3 WP4341	5/71	0.817419	0.999991	0	0	0.720116	0.145178	CYP27B1;CXCL8;NOD2;NFKB2;MAPK13
EGFR Tyrosine Kinase Inhibitor Resistance WP4806	6/84	0.821861	0.999991	0	0	0.731094	0.143428	BCL2L11;PDGFC;BCL2;NRG1;FGF2;MTOR
MicroRNAs in cardiomyocyte hypertrophy WP1544	6/84	0.821861	0.999991	0	0	0.731094	0.143428	HDAC4;MYEF2;LIF;NRG1;FGF2;MTOR
IL17 signaling pathway WP2112	2/32	0.821987	0.999991	0	0	0.633965	0.124276	RELA;NFKBIB
Mammary gland development pathway - Pregnancy and lactation (Stage 3 of 4) WP2817	2/32	0.821987	0.999991	0	0	0.633965	0.124276	CEBPA;ESR1
VEGFA-VEGFR2 Signaling Pathway WP3888	36/432	0.822021	0.999991	0	0	0.862418	0.169024	HDAC4;NAPA;ARF4;CXCL8;EPB41;NOTCH4;SRP54;FOXO4;PTGS2;GIGYF2;RELA;ACACA;HERPUD1;RPS6KA5;DNAJB9;EIF2AK3;PDE4DIP;STAM;DKK1;MTOR;ERN1;NR4A2;AFDN;ARMCX1;OCLN;BMP2;NR4A3;SYNJ1;AKT1S1;BCL2;SPIRE1;CYCS;HYOU1;TPP1;P4HB;ATF6
Translation inhibitors in chronically activated PDGFRA cells WP4566	3/46	0.826212	0.999991	0	0	0.663323	0.126631	RPS6KA5;CSNK2A1;MTOR
Primary focal segmental glomerulosclerosis (FSGS) WP2572	5/72	0.826769	0.999991	0	0	0.709329	0.134936	MME;COL4A4;COL4A3;CLDN1;DKK1
Pyrimidine metabolism WP4022	6/85	0.830378	0.999991	0	0	0.721799	0.134164	NME7;POLR1B;POLE3;POLR3E;NT5M;UPP1
Estrogen metabolism WP697	1/18	0.834627	0.999991	0	0	0.559489	0.101139	CYP1B1
Proteoglycan biosynthesis WP4784	1/18	0.834627	0.999991	0	0	0.559489	0.101139	B4GALT7
Simplified Depiction of MYD88 Distinct Input-Output Pathway WP3877	1/18	0.834627	0.999991	0	0	0.559489	0.101139	TLR6
Transcription co-factors SKI and SKIL protein partners WP4533	1/18	0.834627	0.999991	0	0	0.559489	0.101139	PRMT5
Monoamine GPCRs WP58	2/33	0.835055	0.999991	0	0	0.61348	0.110584	HTR2B;ADRA2C
Resistin as a regulator of inflammation WP4481	2/33	0.835055	0.999991	0	0	0.61348	0.110584	CXCL8;RELA
Head and Neck Squamous Cell Carcinoma WP4674	5/73	0.835726	0.999991	0	0	0.698859	0.125413	REL;TSC1;RELA;MTOR;NFKB2
ncRNAs involved in Wnt signaling in hepatocellular carcinoma WP4336	6/86	0.838565	0.999991	0	0	0.712737	0.125487	CSNK2A1;FZD5;CSNK2A3;TCF7;KLF4;DKK1
Insulin Signaling WP481	12/160	0.843226	0.999991	0	0	0.770056	0.13131	LIPE;RPS6KA5;STXBP2;IRS2;CBLB;TSC1;TRIB3;MAP3K13;PIK3C2A;SH2B2;MTOR;MAPK13
Modulators of TCR signaling and T cell activation WP5072	4/61	0.844097	0.999991	0	0	0.667036	0.113055	REL;CBLB;RELA;LAT
Notch Signaling Pathway Netpath WP61	4/61	0.844097	0.999991	0	0	0.667036	0.113055	JAG2;ADAM17;HEY1;NOTCH4
Oxidation by Cytochrome P450 WP43	4/61	0.844097	0.999991	0	0	0.667036	0.113055	CYP27B1;CYP4V2;CYP2R1;CYP1B1
Exercise-induced Circadian Regulation WP410	3/48	0.847539	0.999991	0	0	0.633772	0.104838	IDI1;G0S2;HERPUD1
Apoptosis Modulation by HSP70 WP384	1/19	0.850368	0.999991	0	0	0.528377	0.0856425	CYCS
Cell Differentiation - Index expanded WP2023	1/19	0.850368	0.999991	0	0	0.528377	0.0856425	KLF4
LTF danger signal response pathway WP4478	1/19	0.850368	0.999991	0	0	0.528377	0.0856425	CXCL8
Serotonin Receptor 4/6/7 and NR3C Signaling WP734	1/19	0.850368	0.999991	0	0	0.528377	0.0856425	RPS6KA5
Cytosolic DNA-sensing pathway WP4655	5/75	0.852502	0.999991	0	0	0.678816	0.108325	CYLD;TREX1;POLR3E;RELA;NFKBIB
Phosphoinositides metabolism WP4971	3/49	0.857322	0.999991	0	0	0.61996	0.0954375	PIKFYVE;PIP4P1;PIK3C2A
Overview of leukocyte-intrinsic Hippo pathway functions WP4542	2/35	0.858617	0.999991	0	0	0.576236	0.0878369	FOXO4;FERMT3
Leptin signaling pathway WP2034	5/76	0.860341	0.999991	0	0	0.669218	0.100668	REL;ESR1;ACACA;RELA;MTOR
Prolactin Signaling Pathway WP2037	5/76	0.860341	0.999991	0	0	0.669218	0.100668	IRS2;GAB2;RELA;MTOR;NFKBIB
3q29 copy number variation syndrome WP4906	4/63	0.861554	0.999991	0	0	0.644354	0.0960197	DYNC2H1;TFRC;CEP350;MYCBP2
Regulation of toll-like receptor signaling pathway WP1449	10/139	0.861855	0.999991	0	0	0.736229	0.109454	CYLD;CXCL8;IRAK2;LY96;IRAK3;TLR6;SQSTM1;RELA;NFKB2;MAPK13
Metabolism of Spingolipids in ER and Golgi apparatus WP4142	1/20	0.864612	0.999991	0	0	0.50054	0.072816	KDSR
Serotonin Receptor 2 and ELK-SRF/GATA4 signaling WP732	1/20	0.864612	0.999991	0	0	0.50054	0.072816	HTR2B
Photodynamic therapy-induced AP-1 survival signaling. WP3611	3/50	0.866551	0.999991	0	0	0.606736	0.0869053	BCL2L11;BCL2;MAPK13
Synaptic signaling pathways associated with autism spectrum disorder WP4539	3/50	0.866551	0.999991	0	0	0.606736	0.0869053	TSC1;PRKAB1;MTOR
Ebola Virus Pathway on Host WP4217	9/129	0.875072	0.999991	0	0	0.712282	0.0950538	ADAM17;NPC1;NEDD4;ICAM2;REL;HLA-DPB1;ICAM3;RELA;NFKB2
Nicotine Activity on Dopaminergic Neurons WP1602	1/21	0.8775	0.999991	0	0	0.475487	0.062136	TH
Pathogenesis of SARS-CoV-2 Mediated by nsp9-nsp10 Complex WP4884	1/21	0.8775	0.999991	0	0	0.475487	0.062136	CXCL8
Tamoxifen metabolism WP691	1/21	0.8775	0.999991	0	0	0.475487	0.062136	CYP1B1
TNF-alpha signaling pathway WP231	6/92	0.881185	0.999991	0	0	0.662791	0.0838351	CSNK2A1;REL;BIRC3;NSMAF;NFKB2;NFKBIB
Ciliary landscape WP4352	16/216	0.883109	0.999991	0	0	0.759194	0.0943725	NEK8;PSMD12;CNOT6L;WHRN;IFT172;ANKS3;CNOT10;LZTFL1;TTC8;WNK1;PSMC4;XPNPEP3;RANBP10;EXOC6;CNOT9;CCDC40
Spinal Cord Injury WP2431	8/118	0.883562	0.999991	0	0	0.690717	0.0855065	RTN4R;BCAN;ZFP36;CXCL8;PTGS2;E2F5;CXCL2;LTB4R
Brain-derived neurotrophic factor (BDNF) signaling pathway WP2380	10/144	0.888279	0.999991	0	0	0.708561	0.0839424	ADAM17;BMP2;RPS6KA5;BCL2L11;CSNK2A1;IRS2;SQSTM1;RELA;SH2B2;MTOR
Complement Activation WP545	1/22	0.889162	0.999991	0	0	0.452819	0.0531956	CD55
Methionine De Novo and Salvage Pathway WP3580	1/22	0.889162	0.999991	0	0	0.452819	0.0531956	MTR
Vitamin D in inflammatory diseases WP4482	1/22	0.889162	0.999991	0	0	0.452819	0.0531956	RELA
Cardiac Progenitor Differentiation WP2406	3/53	0.891149	0.999991	0	0	0.570237	0.065716	NRG1;FGF2;DKK1
LncRNA involvement in canonical Wnt signaling and colorectal cancer WP4258	6/94	0.893102	0.999991	0	0	0.647655	0.07322	CSNK2A1;FZD5;CSNK2A3;TCF7;DKK1;ATF3
Blood Clotting Cascade WP272	1/23	0.899714	0.999991	0	0	0.432213	0.0456757	F12
Cancer immunotherapy by PD-1 blockade WP4585	1/23	0.899714	0.999991	0	0	0.432213	0.0456757	CD274
Hippo-Yap signaling pathway WP4537	1/23	0.899714	0.999991	0	0	0.432213	0.0456757	TNIK
Kynurenine Pathway and links to Cellular Senescence WP5044	1/23	0.899714	0.999991	0	0	0.432213	0.0456757	QPRT
IL-5 signaling pathway WP127	2/40	0.904649	0.999991	0	0	0.500277	0.0501319	BCL2;CSF2RB
Microglia Pathogen Phagocytosis Pathway WP3937	2/40	0.904649	0.999991	0	0	0.500277	0.0501319	PIK3C2A;LAT
Complement system WP2806	6/97	0.909059	0.999991	0	0	0.6262	0.059705	PRNP;PROS1;F12;C5AR1;ICAM2;CD55
Angiogenesis WP1539	1/24	0.909262	0.999991	0	0	0.413398	0.0393234	FGF2
GPCRs, Class B Secretin-like WP334	1/24	0.909262	0.999991	0	0	0.413398	0.0393234	GIPR
Kallmann's Syndrome WP5074	1/24	0.909262	0.999991	0	0	0.413398	0.0393234	CHD7
miRNA regulation of p53 pathway in prostate cancer WP3982	1/24	0.909262	0.999991	0	0	0.413398	0.0393234	ATM
Sphingolipid Metabolism (general overview) WP4725	1/24	0.909262	0.999991	0	0	0.413398	0.0393234	KDSR
IL-18 signaling pathway WP4754	20/272	0.911471	0.999991	0	0	0.752577	0.0697603	TOMM40;CXCL8;EPB41;MMP1;PTGS2;CLDN1;CXCL2;RELA;NFKB2;BMP2;CLDN3;CLDN15;CCDC9;CLDN12;REL;BCL2;HMOX1;CYCS;ATF3;BIRC3
Hypothesized Pathways in Pathogenesis of Cardiovascular Disease WP3668	1/25	0.917901	0.999991	0	0	0.396151	0.0339365	TGFBR3
Mammalian disorder of sexual development WP4842	1/25	0.917901	0.999991	0	0	0.396151	0.0339365	SOX8
Physiological and pathological hypertrophy of the heart WP1528	1/25	0.917901	0.999991	0	0	0.396151	0.0339365	MYEF2
Sphingolipid Metabolism (integrated pathway) WP4726	1/25	0.917901	0.999991	0	0	0.396151	0.0339365	KDSR
Fas ligand pathway and stress induction of heat shock proteins WP314	2/42	0.918794	0.999991	0	0	0.475211	0.0402469	BCL2;CYCS
IL-2 signaling pathway WP49	2/42	0.918794	0.999991	0	0	0.475211	0.0402469	BCL2;GAB2
Metabolic reprogramming in colon cancer WP4290	2/42	0.918794	0.999991	0	0	0.475211	0.0402469	PPAT;FASN
Tryptophan metabolism WP465	2/42	0.918794	0.999991	0	0	0.475211	0.0402469	CYP1B1;ACAT1
MECP2 and Associated Rett Syndrome WP3584	4/72	0.920818	0.999991	0	0	0.558793	0.0460966	MPP1;FGF2;MTOR;CDON
Acute viral myocarditis WP4298	5/86	0.921128	0.999991	0	0	0.586273	0.0481659	BCL2;CYCS;NOD2;CD55;NFKB2
Cytokines and Inflammatory Response WP530	1/26	0.925718	0.999991	0	0	0.380284	0.0293523	CXCL2
Glucuronidation WP698	1/26	0.925718	0.999991	0	0	0.380284	0.0293523	PGM3
PPAR-alpha pathway WP2878	1/26	0.925718	0.999991	0	0	0.380284	0.0293523	PPARA
Wnt/beta-catenin signaling pathway in leukemia WP3658	1/26	0.925718	0.999991	0	0	0.380284	0.0293523	DKK1
Neural Crest Differentiation WP2064	6/101	0.927098	0.999991	0	0	0.5997	0.0453948	HDAC4;MPZ;NOTCH4;FGF2;HDAC6;NFKB2
Kit receptor signaling pathway WP304	3/59	0.928498	0.999991	0	0	0.508971	0.0377588	BCL2;GAB2;SH2B2
Heart Development WP1591	2/44	0.930947	0.999991	0	0	0.452531	0.03238	BMP2;HEY1
Interleukin-11 Signaling Pathway WP2332	2/44	0.930947	0.999991	0	0	0.452531	0.03238	BCL2;RELA
Renin-angiotensin-aldosterone system (RAAS) WP4756	2/44	0.930947	0.999991	0	0	0.452531	0.03238	CREB3;ACE
Follicle Stimulating Hormone (FSH) signaling pathway WP2035	1/27	0.932792	0.999991	0	0	0.365638	0.0254387	MTOR
Intracellular trafficking proteins involved in CMT neuropathy WP4856	1/27	0.932792	0.999991	0	0	0.365638	0.0254387	MPZ
Intraflagellar transport proteins binding to dynein WP4532	1/27	0.932792	0.999991	0	0	0.365638	0.0254387	DYNC2H1
Oxidative phosphorylation WP623	3/60	0.933436	0.999991	0	0	0.500014	0.0344426	NDUFS1;NDUFV3;ATP5MC1
Toll-like Receptor Signaling Pathway WP75	6/103	0.934876	0.999991	0	0	0.58727	0.0395478	CXCL8;LY96;TLR6;RELA;NFKBIB;MAPK13
Vitamin D Receptor Pathway WP2877	12/182	0.936211	0.999991	0	0	0.66958	0.0441352	CYP27B1;CEBPA;SLC37A2;CDKN2B;SEMA3B;CREG2;G0S2;CDKAL1;STAM;MXD1;KLF4;PTHLH
Nephrotic syndrome WP4758	2/45	0.936357	0.999991	0	0	0.441983	0.0290639	COL4A4;COL4A3
T-cell receptor (TCR) signaling pathway WP69	5/90	0.937975	0.999991	0	0	0.55856	0.0357659	REL;CBLB;GAB2;RELA;LAT
TYROBP causal network in microglia WP3945	3/61	0.938056	0.999991	0	0	0.491366	0.0314204	ABCC4;HCLS1;LHFPL2
Nanoparticle-mediated activation of receptor signaling WP2643	1/28	0.939192	0.999991	0	0	0.352076	0.0220878	MAPK13
Aryl Hydrocarbon Receptor Pathway WP2873	2/46	0.941364	0.999991	0	0	0.431914	0.0260986	MGST1;CYP1B1
TGF-beta Signaling Pathway WP366	8/132	0.941768	0.999991	0	0	0.612256	0.0367333	TGFBR3;CDKN2B;PARD6A;MMP1;FOSB;E2F5;ATF3;UCHL5
Proteasome Degradation WP183	3/62	0.942379	0.999991	0	0	0.483011	0.0286656	PSMD12;PSMC4;NEDD4
Cell migration and invasion through p75NTR WP4561	1/30	0.950222	0.999991	0	0	0.327759	0.0167353	EFNA3
Differentiation Pathway WP2848	2/48	0.950275	0.999991	0	0	0.413089	0.0210691	FGF2;DKK1
Oncostatin M Signaling Pathway WP2374	3/65	0.953723	0.999991	0	0	0.459563	0.021775	MMP1;RELA;MTOR
Tumor suppressor activity of SMARCB1 WP4204	1/31	0.954963	0.999991	0	0	0.316816	0.0145998	DPF3
Type I interferon induction and signaling during SARS-CoV-2 infection WP4868	1/31	0.954963	0.999991	0	0	0.316816	0.0145998	TLR6
DNA damage response (only ATM dependent) WP710	6/110	0.956607	0.999991	0	0	0.547529	0.0242897	BCL2L11;TCF7;BCL2;ATM;PIK3C2A;NFKB2
AGE/RAGE pathway WP2324	3/66	0.957015	0.999991	0	0	0.452243	0.0198698	CYCS;FOXO4;RELA
SARS-CoV-2 innate immunity evasion and cell-specific immune response WP5039	3/66	0.957015	0.999991	0	0	0.452243	0.0198698	CXCL8;LARP1;CXCL2
Thyroid stimulating hormone (TSH) signaling pathway WP2032	3/66	0.957015	0.999991	0	0	0.452243	0.0198698	PAX8;PDE4D;MTOR
Constitutive Androstane Receptor Pathway WP2875	1/32	0.959252	0.999991	0	0	0.306579	0.0127541	ALAS1
Development and heterogeneity of the ILC family WP3893	1/32	0.959252	0.999991	0	0	0.306579	0.0127541	TSLP
Monoamine Transport WP727	1/32	0.959252	0.999991	0	0	0.306579	0.0127541	TH
B Cell Receptor Signaling Pathway WP23	5/97	0.959842	0.999991	0	0	0.51586	0.0211436	MAX;REL;HCLS1;GAB2;RELA
Pathways Regulating Hippo Signaling WP4540	5/98	0.962311	0.999991	0	0	0.510285	0.0196037	GNAL;TCF7;CDH15;PRKAB1;MTOR
MAPK Cascade WP422	1/33	0.963133	0.999991	0	0	0.296982	0.0111557	LAMTOR3
Pregnane X receptor pathway WP2876	1/33	0.963133	0.999991	0	0	0.296982	0.0111557	ABCC4
MAPK Signaling Pathway WP382	16/246	0.963776	0.999991	0	0	0.659062	0.0243171	DUSP4;PTPRR;MAX;LRRK2;CACNA2D2;DUSP9;FGF2;RELA;NFKB2;MAPK13;RPS6KA5;DDIT3;MAP3K13;LAMTOR3;HSPA1B;FGF21
Translation Factors WP107	2/52	0.964369	0.999991	0	0	0.379958	0.0137852	CLUH;EIF2AK3
Type 2 papillary renal cell carcinoma WP4241	1/34	0.966645	0.999991	0	0	0.287966	0.00976898	BIRC7
Metapathway biotransformation Phase I and II WP702	11/183	0.966772	0.999991	0	0	0.606256	0.0204871	CYP27B1;TPMT;CYP4V2;AKR1C1;CYP2R1;MGST1;AKR1A1;CYP1B1;NAT9;NAT8L;NAA80
ESC Pluripotency Pathways WP3931	6/116	0.969751	0.999991	0	0	0.517491	0.0158952	FZD5;LIF;BMPR1B;FGF2;MTOR;FGF21
TGF-beta Receptor Signaling WP560	2/54	0.969888	0.999991	0	0	0.365304	0.0111689	TGFBR3;LIF
Hematopoietic Stem Cell Differentiation WP2849	2/55	0.972329	0.999991	0	0	0.358391	0.0100568	FOSB;CBFA2T3
Wnt signaling in kidney disease WP4150	1/36	0.972697	0.999991	0	0	0.271481	0.00751534	FZD5
Mesodermal commitment pathway WP2857	8/147	0.974143	0.999991	0	0	0.545729	0.0142968	ARL4A;FZD5;NABP2;KLF4;DKK1;ACVR2B;EMSY;ACACA
Allograft Rejection WP2328	4/89	0.974782	0.999991	0	0	0.446613	0.0114073	CXCL8;LRRK2;HLA-DPB1;CD55
Pancreatic adenocarcinoma pathway WP4263	4/89	0.974782	0.999991	0	0	0.446613	0.0114073	RALA;BRCA2;RELA;MTOR
Effect of progerin on genes involved in Hutchinson-Gilford progeria syndrome WP4320	1/37	0.975298	0.999991	0	0	0.263925	0.00660138	SREBF1
Melatonin metabolism and effects WP3298	1/37	0.975298	0.999991	0	0	0.263925	0.00660138	CYP1B1
Photodynamic therapy-induced HIF-1 survival signaling WP3614	1/37	0.975298	0.999991	0	0	0.263925	0.00660138	PTGS2
Peptide GPCRs WP24	3/74	0.976456	0.999991	0	0	0.401108	0.00955648	ATP8A1;C5AR1;CCR10
Sleep regulation WP3591	1/38	0.977651	0.999991	0	0	0.256778	0.00580377	TH
ErbB signaling pathway WP673	4/91	0.978096	0.999991	0	0	0.436297	0.00966299	BCL2L11;CBLB;NRG1;MTOR
TGF-beta receptor signaling in skeletal dysplasias WP4816	2/58	0.978558	0.999991	0	0	0.339135	0.00735076	TGFBR3;LIF
G13 Signaling Pathway WP524	1/39	0.97978	0.999991	0	0	0.250007	0.00510684	ARHGEF1
Prader-Willi and Angelman Syndrome WP3998	2/61	0.983418	0.999991	0	0	0.321838	0.00538131	CDKN2B;TUBGCP5
Endometrial cancer WP4155	2/63	0.986044	0.999991	0	0	0.311251	0.00437433	TCF7;FGF2
Genes controlling nephrogenesis WP4823	1/43	0.986453	0.999991	0	0	0.226147	0.00308445	ETV4
Vitamin A and carotenoid metabolism WP716	1/43	0.986453	0.999991	0	0	0.226147	0.00308445	CRABP2
Wnt signaling WP428	5/115	0.987766	0.999991	0	0	0.431015	0.00530546	CSNK2A1;FZD5;CSNK2A3;TCF7;DKK1
Envelope proteins and their potential roles in EDMD physiopathology WP4535	1/46	0.989969	0.999991	0	0	0.211035	0.00212764	ADCY7
Regulation of Microtubule Cytoskeleton WP2038	1/46	0.989969	0.999991	0	0	0.211035	0.00212764	PARD6A
Wnt signaling pathway and pluripotency WP399	4/102	0.990102	0.999991	0	0	0.387088	0.00385032	FZD5;NFYA;LRRK2;TCF7
Focal Adhesion-PI3K-Akt-mTOR-signaling pathway WP3932	18/303	0.99089	0.999991	0	0	0.597151	0.00546481	PFKFB2;SREBF1;LAMA1;IRS2;TSC1;PIK3C2A;FGF2;ACACA;MTOR;EPOR;LIPE;CREB3;EFNA3;COL4A4;PDGFC;CHAD;AKT1S1;FGF21
Development of ureteric collection system WP5053	1/47	0.990925	0.999991	0	0	0.206436	0.00188203	ETV4
Melanoma WP4685	2/68	0.990961	0.999991	0	0	0.287592	0.00261145	STK19;LAMTOR3
RAC1/PAK1/p38/MMP2 Pathway WP3303	2/68	0.990961	0.999991	0	0	0.287592	0.00261145	RELA;MAPK13
Retinoblastoma gene in cancer WP2446	3/87	0.991473	0.999991	0	0	0.338787	0.00290132	ORC1;RPA2;MAPK13
Rett syndrome causing genes WP4312	1/48	0.99179	0.999991	0	0	0.202033	0.00166563	HIVEP2
Androgen receptor signaling pathway WP138	3/90	0.993291	0.999991	0	0	0.327051	0.00220148	AR;RNF6;RELA
Non-small cell lung cancer WP4255	2/72	0.993633	0.999991	0	0	0.271098	0.00173148	CRABP2;CYCS
GPCRs, Other WP117	3/91	0.993809	0.999991	0	0	0.323316	0.00200777	P2RY11;LTB4R2;CELSR3
Circadian rhythm related genes WP3594	10/201	0.994002	0.999991	0	0	0.495528	0.00298115	PRMT5;SREBF1;TH;MYBBP1A;KMT2A;NOCT;NAMPT;GFPT1;PPARG;PPARA
Netrin-UNC5B signaling pathway WP4747	1/52	0.9945	0.999991	0	0	0.186146	0.00102668	ROBO4
Sudden Infant Death Syndrome (SIDS) Susceptibility Pathways WP706	7/158	0.994538	0.999991	0	0	0.43904	0.00240471	AR;CXCL8;TH;NFYA;CDCA7L;SCN3B;NFKB2
Arrhythmogenic Right Ventricular Cardiomyopathy WP2118	2/74	0.994662	0.999991	0	0	0.263538	0.00141057	TCF7;CACNA2D2
Hepatitis B infection WP4666	6/152	0.997156	0.999991	0	0	0.38911	0.00110819	CREB3;CXCL8;BCL2;CYCS;RELA;MAPK13
Ras signaling WP4223	8/184	0.997256	0.999991	0	0	0.430114	0.00118164	AFDN;RALA;REL;FOXO4;GAB2;RASAL3;LAT;RELA
Fragile X Syndrome WP4549	4/121	0.997647	0.999991	0	0	0.323886	0.000762916	AKT1S1;PICK1;TSC1;MTOR
Electron Transport Chain (OXPHOS system in mitochondria) WP111	3/103	0.997673	0.999991	0	0	0.284329	0.000662402	NDUFS1;NDUFV3;ATP5MC1
T-Cell antigen Receptor (TCR) pathway during Staphylococcus aureus infection WP3863	1/62	0.997979	0.999991	0	0	0.155544	0.000314601	LAT
mRNA Processing WP411	4/126	0.998406	0.999991	0	0	0.310525	0.000495488	NUDT21;RNMT;SRP54;SUPT5H
Association Between Physico-Chemical Features and Toxicity Associated Pathways WP3680	1/66	0.998646	0.999991	0	0	0.145939	0.000197722	FZD5
Chemokine signaling pathway WP3929	6/164	0.998781	0.999991	0	0	0.359317	0.000438099	ADCY7;CCL28;CCR10;RELA;NFKBIB;CCL26
Focal Adhesion WP306	8/198	0.998905	0.999991	0	0	0.39811	0.000436049	SRMS;LAMA1;COL4A4;PDGFC;CHAD;BCL2;XIAP;BIRC3
PI3K-Akt signaling pathway WP4172	16/340	0.999691	0.999991	0	0	0.465392	0.000143641	LAMA1;TSC1;FGF2;RELA;MTOR;EPOR;CREB3;EFNA3;BCL2L11;COL4A4;PDGFC;COL4A3;CHAD;BCL2;PKN2;FGF21
Regulation of Actin Cytoskeleton WP51	4/150	0.999764	0.999991	0	0	0.259134	6.11487e-05	ARHGEF1;PIK3C2A;FGF2;FGF21
Myometrial relaxation and contraction pathways WP289	4/156	0.999854	0.999991	0	0	0.248821	3.6235e-05	CREB3;PDE4D;ADCY7;ATF3
Hippo-Merlin Signaling Dysregulation WP4541	2/120	0.999915	0.999991	0	0	0.160393	1.3651e-05	DCAF1;CDH15
GPCRs, Class A Rhodopsin-like WP455	9/257	0.999938	0.999991	0	0	0.342199	2.11361e-05	GPR173;P2RY11;ADORA2B;HTR2B;GPR3;ADRA2C;CCR10;LTB4R;F2RL3
Calcium Regulation in the Cardiac Cell WP536	2/150	0.999991	0.999991	0	0	0.127667	1.09882e-06	STIM2;ADCY7

## Sheet: UP_Elsevier
Term	Overlap	P-value	Adjusted P-value	Old P-value	Old Adjusted P-value	Odds Ratio	Combined Score	Genes
Adipocyte Hypertrophy and Hyperplasia	12/29	5.8677e-06	0.00709991	0	0	6.75294	81.3463	CEBPA;SREBF1;DGAT2;ACSL1;SCD;FASN;IRS2;GPAT3;PPARG;LPIN1;PPARA;ACACA
ER Associated Protein Degradation in Vesicular Transport	9/19	2.37993e-05	0.0122441	0	0	8.59968	91.551	ERLEC1;HSPA5;SELENOS;DERL3;EDEM1;DNAJC10;DERL1;SYVN1;HERPUD1
Lipodystrophy, Familial Partial	7/12	3.58242e-05	0.0122441	0	0	13.3669	136.835	SREBF1;ACSL1;SCD;FASN;PPARG;LPIN1;ACACA
Estrogen Deficiency in Female Obesity	6/9	4.78624e-05	0.0122441	0	0	19.0876	189.867	SREBF1;SCD;FASN;PPARG;ESR1;ACACA
Lipogenesis Regulation in Adipocyte	10/25	5.05953e-05	0.0122441	0	0	6.37174	63.027	SREBF1;DGAT2;ACSL1;SCD;FASN;IRS2;GPAT3;LPIN1;PPARA;ACACA
Lipid Metabolism Impairement in non-Alcoholic Fatty Liver Disease	11/32	0.00010909	0.0219999	0	0	5.00735	45.6838	PFKFB2;CEBPA;FADS2;SREBF1;GK;ACSL1;SCD;FASN;IRS2;PPARG;ACACA
SERPINA1 Associated Liver Damage	9/25	0.000310544	0.0512468	0	0	5.37302	43.3989	ERN1;CXCL8;HSPA5;EDEM1;DDIT3;EIF2AK3;BCL2;CYCS;ATF6
CA4 Induces Apoptosis of Choriocapillaris Endothelial Cells in RP	5/8	0.000338822	0.0512468	0	0	15.8979	127.025	ERN1;HSPA5;DDIT3;EIF2AK3;ATF6
CFTR Misfolding and Degradation (Class II Mutations)	9/30	0.00140506	0.17312	0	0	4.0926	26.8788	ERN1;HSPA5;SELENOS;EDEM1;DNAJC10;DERL1;EIF2AK3;ATF6;HDAC6
mTOR Signaling Activation by Amino Acids	12/48	0.00143074	0.17312	0	0	3.18554	20.8639	PPP1R15A;RRAGC;SLC7A8;NPRL2;AKT1S1;RRAGD;IRS2;TSC1;FNIP1;WDR24;LAMTOR3;MTOR
Familial Partial Lipodystrophy Type 2 Progression (Hypothesis)	6/15	0.00172427	0.178504	0	0	6.36041	40.471	SREBF1;ACOX1;FASN;PPARG;PPARA;ACACA
Protein Degradation Dysregulation in Dementia (Hypothesis)	7/20	0.00177029	0.178504	0	0	5.13883	32.5628	ERLEC1;HSPA5;SELENOS;EDEM1;DNAJC10;DERL1;SYVN1
Lipogenesis/Lipolysis Activation in Cancer Cells and Cancer-Associated Adipocytes	9/32	0.00231475	0.21545	0	0	3.73631	22.6736	LIPE;SREBF1;DGAT2;SCD;FASN;LPCAT1;GPAT3;LPIN1;ACACA
Androgens in Sebocyte Maturation	14/65	0.00276697	0.239146	0	0	2.62398	15.4553	SREBF1;CEBPA;DGAT2;IRS2;DKK1;FADS2;AR;SCD;FASN;KRT15;PPARG;PPARA;BMPR1B;FADS1
MYOC Associated Glaucoma	8/28	0.00360778	0.273038	0	0	3.81795	21.4747	ERN1;HSPA5;EDEM1;DDIT3;EIF2AK3;BCL2;CYCS;ATF6
Familial Partial Lipodystrophy Type 4 Progression (Hypothesis)	6/17	0.00361042	0.273038	0	0	5.20339	29.2635	SREBF1;ACOX1;FASN;PPARG;PPARA;ACACA
Genes with Mutation in Cancer-Associated Dysregulated DNA Repair	9/35	0.00449248	0.307433	0	0	3.30464	17.8628	FEN1;WRN;RAD50;LIG1;ATM;TP53BP1;BRCA2;MLH1;PMS1
Autophagic-Lysosomal System Decline Associated with Aging	8/29	0.00457338	0.307433	0	0	3.63594	19.5887	ERN1;MAP1LC3B;HSPA5;ATG101;EDEM1;DNAJC10;ATF6;MTOR
Wolfram Syndrome Progression (Hypothesis)	6/18	0.00498492	0.317461	0	0	4.76951	25.2848	ERN1;HSPA5;EDEM1;EIF2AK3;BCL2;ATF6
PPARGC1A Repression in Huntington Disease	6/19	0.0067075	0.395785	0	0	4.40239	22.0319	HMGCS1;CYCS;PPARG;HMGCR;TFB2M;PPARA
ER Stress (Unfolded Protein Response)	8/31	0.00708573	0.395785	0	0	3.31941	16.43	PPP1R15A;ERN1;HSPA5;EDEM1;DDIT3;EIF2AK3;BCL2;ATF6
ER Stress in Macular Degeneration	7/25	0.0071961	0.395785	0	0	3.71035	18.3077	ERN1;CXCL8;DDIT3;EIF2AK3;BCL2;CYCS;ATF6
Proteins with Altered Expression in Cancer-Associated Dysregulated DNA Repair	8/32	0.00867606	0.456436	0	0	3.18092	15.1004	FEN1;WRN;LIG1;ATM;TP53BP1;BRCA2;MLH1;PMS1
Berardinelli-Seip Syndrome Progression (Hypothesis)	5/15	0.010302	0.498396	0	0	4.76753	21.8134	SREBF1;FASN;PPARG;LPIN1;ACACA
PARK7 and LRRK2 in Young Onset Parkinson's Disease	4/10	0.0107093	0.498396	0	0	6.35476	28.8292	TH;LRRK2;CYCS;HDAC6
Omega-6-Fatty Acid Metabolism	4/10	0.0107093	0.498396	0	0	6.35476	28.8292	FADS2;ELOVL5;PTGS2;FADS1
Telomer Attrition Triggers Genomic Instability	9/40	0.0113055	0.506654	0	0	2.77087	12.4203	WRN;RAD50;PAX8;TNKS;POT1;ATM;TPP1;ESR1;ATR
DNA Persistent Repair Inhibits mTOR Signaling	9/41	0.0132937	0.555975	0	0	2.68413	11.5967	NAMPT;AKT1S1;IRS2;TSC1;ATM;BRCA2;RELA;MTOR;ATR
Vitamin D and Folate in Multiple Sclerosis	3/6	0.0137781	0.555975	0	0	9.5287	40.8274	SLC46A1;MTHFR;MTR
Hyperglycemia and Hyperlipidemia Trigger beta-Cell Apoptosis	7/28	0.0137845	0.555975	0	0	3.17977	13.6228	ERN1;EDEM1;DDIT3;EIF2AK3;BCL2;ATF6;ATF3
ER Stress in Huntington Disease	6/23	0.0179636	0.70116	0	0	3.36579	13.5285	ERN1;DDIT3;EIF2AK3;BCL2;CYCS;ATF6
Apoptosis of Renal Tubule Epithelial Cell in Pyelonephritis	7/30	0.0200601	0.733229	0	0	2.90295	11.3477	ERN1;HSPA5;DDIT3;EIF2AK3;BCL2;CYCS;ATF6
Single-Strand Mismatch	4/12	0.0216371	0.733229	0	0	4.76554	18.268	FEN1;LIG1;MLH1;PMS1
Genes with Mutations Associated with Osteopetrosis	4/12	0.0216371	0.733229	0	0	4.76554	18.268	CLCN7;OSTM1;PLEKHM1;FERMT3
Alveolar Epithelial Cell Autophagy in COPD	6/24	0.0220728	0.733229	0	0	3.17862	12.1214	MAP1LC3B;DDIT3;EIF2AK3;BCL2;HMOX1;ATF6
Immunoglobulin Class-Switch Recombination via Classical non-Homologous End-Joining	3/7	0.022421	0.733229	0	0	7.14613	27.1393	MDC1;ATM;TP53BP1
Omega-3-Fatty Acid Metabolism	3/7	0.022421	0.733229	0	0	7.14613	27.1393	FADS2;ELOVL5;FADS1
Oxidized LDL/OLR1 Activates Cell Proliferation in Cancer	5/18	0.0231297	0.736499	0	0	3.66672	13.8112	BCL2;REL;OLR1;RELA;NFKB2
Osteoclasts Function in Osteopetrosis	5/19	0.0289948	0.899583	0	0	3.40462	12.0545	CLCN7;OSTM1;PLEKHM1;ACP5;FERMT3
SIRT1 Signaling in Aging	8/40	0.0322587	0.968664	0	0	2.38464	8.18876	HDAC4;SREBF1;NAMPT;LONP1;TSC1;TP53BP1;RELA;MTOR
Persisted DNA Repair Triggers Genomic Instability	7/33	0.0328225	0.968664	0	0	2.56757	8.77245	MDC1;FEN1;WRN;RAD50;ATM;BRCA2;ATR
Mitochondrial Protein Transport	5/20	0.0357186	0.999887	0	0	3.17747	10.5876	HSPA9;TOMM40;PAM16;TOMM5;TOMM6
Golgi to Endosome Transport	8/41	0.0368563	0.999887	0	0	2.31225	7.6321	NAPA;GOLGA4;GOSR1;GOLGA1;VPS35;VAMP4;CLINT1;YKT6
Keep out Signal: LTF Inhibits Neutrophil Recruitment and Inflammation	4/14	0.037551	0.999887	0	0	3.81201	12.5112	CEBPA;CXCL8;C5AR1;REL
Single Strand Mismatch DNA Repair Suppression in Cancer	4/14	0.037551	0.999887	0	0	3.81201	12.5112	FEN1;LIG1;MLH1;PMS1
Double Strand DNA non-Homologous Repair	5/21	0.0433254	0.999887	0	0	2.97872	9.35024	FEN1;RAD50;WRN;ATM;TP53BP1
Genes with Mutations Associated with Hereditary Breast and/or Ovarian Cancer Syndrome	3/9	0.0465859	0.999887	0	0	4.76356	14.6073	BRCA2;MLH1;MTOR
Longevity Related Drugs	4/15	0.0474597	0.999887	0	0	3.46527	10.5617	ACE;HMGCR;PTGS2;MTOR
EGFR Nuclear Signaling in Colorectal Cancer	5/22	0.0518298	0.999887	0	0	2.80334	8.29731	MDC1;ADAM17;FABP3;PIKFYVE;PTGS2
Proteins Involved in Primary Ovarian Insufficiency	11/68	0.0551513	0.999887	0	0	1.84114	5.33503	DCAF1;TGFBR3;AR;BRSK1;CPEB1;INSIG2;XIAP;TSC1;FOXO4;ESR1;MTOR
TERT Activation in Cancer	7/37	0.0569155	0.999887	0	0	2.22473	6.3765	CEBPA;PAX8;MAX;REL;KLF4;ESR1;NFKB2
Androgen Induced Sebocyte Hyperfunction	4/16	0.0586693	0.999887	0	0	3.17633	9.00755	SREBF1;AR;FADS2;SCD
Fatty Acid Synthase (FASN) Signaling	4/16	0.0586693	0.999887	0	0	3.17633	9.00755	CEBPA;SREBF1;FASN;PPARG
Gluconeogenesis Impairment in non-Alcoholic Fatty Liver Disease	4/16	0.0586693	0.999887	0	0	3.17633	9.00755	CEBPA;IRS2;PPARG;LPIN1
Androgens Promote Scalp Dermal Papilla Regression	6/30	0.0599179	0.999887	0	0	2.38318	6.70812	AR;LIG1;TCF7;ATM;DKK1;ATR
Genes with Mutations Associated with Vitiligo	6/30	0.0599179	0.999887	0	0	2.38318	6.70812	ACE;TSLP;MTHFR;PTPN22;NLRP1;PTGS2
Proteins Involved in Cystic Kidney Disease	6/30	0.0599179	0.999887	0	0	2.38318	6.70812	NEK8;TMEM67;BCL2;SPRY2;TSC1;PTGS2
High Level of Homocystine Effects (Methylation Cycle)	5/23	0.061237	0.999887	0	0	2.64746	7.39435	SLC46A1;CTH;MTHFR;GLRX;MTR
Proteins Involved in Chronic Myeloid Leukemia	5/23	0.061237	0.999887	0	0	2.64746	7.39435	CEBPA;BCL2;REL;PTGS2;MTOR
Familial Partial Lipodystrophy Type 3 Progression (Hypothesis)	3/10	0.0619616	0.999887	0	0	4.08283	11.3553	ACOX1;PPARG;PPARA
ICAM2 -> CTNNB/FOXO/STAT3 Signaling	3/10	0.0619616	0.999887	0	0	4.08283	11.3553	ICAM2;FOXO4;MTOR
Genes with Mutations Associated with Vascular Dementia	2/5	0.074412	0.999887	0	0	6.34912	16.4959	ACE;MTHFR
Proteins with Altered Expression in Vitiligo	2/5	0.074412	0.999887	0	0	6.34912	16.4959	CXCL8;BCL2
AMPK Related Catabolism Deceleration in Glucose Insufficiency	3/11	0.0793554	0.999887	0	0	3.57227	9.0515	SREBF1;HMGCR;ACACA
Dioxin Role in Endometriosis	3/11	0.0793554	0.999887	0	0	3.57227	9.0515	BCL2;CYP1B1;ESR1
Hexosamine Pathway in Diabetic Microangiopathy	3/11	0.0793554	0.999887	0	0	3.57227	9.0515	GFPT1;PGM3;UAP1
Enterocyte Mediated Mucosal Damage in Celiac Disease	5/25	0.0827366	0.999887	0	0	2.38245	5.93728	OCLN;TFRC;REL;RELA;NFKB2
Persistent Double Strand DNA non-Homologous Repair in Cancer	5/25	0.0827366	0.999887	0	0	2.38245	5.93728	FEN1;WRN;RAD50;ATM;TP53BP1
Alternative Lengthening of Telomeres in Cancer	4/18	0.0848771	0.999887	0	0	2.72226	6.7146	TCEAL7;ATM;BRCA2;ATR
Centriole Duplication and Separation	6/33	0.0879393	0.999887	0	0	2.11803	5.14915	ESPL1;CEP350;CENPJ;AKAP9;CCP110;CEP192
AMPK Signaling	7/41	0.0897084	0.999887	0	0	1.96256	4.73212	LIPE;SREBF1;LONP1;HMGCR;PTGS2;ACACA;MTOR
Myocardial Infarction	11/74	0.0900858	0.999887	0	0	1.66524	4.00822	ERN1;HSPA5;MMP1;DDIT3;EIF2AK3;BCL2;XIAP;CYCS;ATF6;MTOR;BIRC3
Proteins Involved in Osteoporosis	14/100	0.0911335	0.999887	0	0	1.55306	3.72026	ACE;MTHFR;IRAK3;HMGCR;PTGS2;FGF2;DKK1;ESR1;PTHLH;CLCN7;P2RX7;CYLD;BMP2;GGCX
Nitric Oxide Effects on beta-Cell	5/26	0.0947963	0.999887	0	0	2.26887	5.34551	PPP1R15A;ERN1;EDEM1;DDIT3;BCL2
Oxidative Stress in Diabetic Neuropathy	3/12	0.0985949	0.999887	0	0	3.17518	7.35605	GFPT1;PGM3;UAP1
CHRAC in Chromatin Remodeling	2/6	0.104729	0.999887	0	0	4.76158	10.7439	POLE3;CHD1
Co-Translational ER Protein Import	2/6	0.104729	0.999887	0	0	4.76158	10.7439	HSPA5;SEC63
Brain Cell Necrosis in Vascular Dementia	2/6	0.104729	0.999887	0	0	4.76158	10.7439	ATP8A1;CYCS
Genes with Mutations Associated with Cystic Fibrosis	2/6	0.104729	0.999887	0	0	4.76158	10.7439	CXCL8;IFRD1
Neurons Necrosis Caused by Energy Deficiency	2/6	0.104729	0.999887	0	0	4.76158	10.7439	ATP8A1;CYCS
Proteins with Altered Expression in Cancer Metabolic Reprogramming	12/85	0.106642	0.999887	0	0	1.56773	3.50903	LIPE;SREBF1;MAP1LC3B;CXCL8;MPC1;SCD;FASN;LPCAT1;TSC1;SLC7A11;ACACA;RELA
Metabolic Effects of Oncogenes and Tumor Suppressor in Cancer Cells	10/68	0.108569	0.999887	0	0	1.64395	3.65017	FADS2;SREBF1;ACSL1;SCD;FASN;TSC1;SLC7A11;HMGCR;ACACA;RELA
Glucocorticoids in Insulin Resistance in Skeletal Muscles	6/35	0.109971	0.999887	0	0	1.97174	4.35269	SREBF1;FASN;DDIT4L;IRS2;TSC1;MTOR
SIRT6 Signaling in Aging	4/20	0.115794	0.999887	0	0	2.38172	5.13484	WRN;REL;RELA;NFKB2
Double Strand DNA Homologous Repair	4/20	0.115794	0.999887	0	0	2.38172	5.13484	MDC1;RAD50;ATM;BRCA2
Li-Fraumeni Syndrome	4/20	0.115794	0.999887	0	0	2.38172	5.13484	CEBPA;BCL2;CYCS;ATM
Apoptosis Block by Inhibitor of Apoptosis Proteins (IAPs) in Cancer	4/20	0.115794	0.999887	0	0	2.38172	5.13484	XIAP;BIRC6;BIRC7;BIRC3
Adiponectin Synthesis Declines in Insulin Resistance	7/44	0.120002	0.999887	0	0	1.80314	3.8231	CEBPA;HSPA5;DDIT3;EIF2AK3;IRS2;PPARG;ATF3
BMP/TGF-beta Signaling Impairment in Pulmonary Hypertension	5/28	0.121399	0.999887	0	0	2.07135	4.36779	TGFBR3;CDKN2B;BMP2;PPARG;BMPR1B
Proteins Involved in Periodontitis	9/61	0.121839	0.999887	0	0	1.64995	3.47323	CXCL8;MMP1;NAMPT;C5AR1;PPARG;NOD2;PTGS2;FGF2;TIMP4
Donohue Syndrome Progression (Hypothesis)	6/36	0.121947	0.999887	0	0	1.90591	4.01036	SREBF1;FASN;IRS2;ACACA;SH2B2;MTOR
ANGPT/TEK Maintains Endothelial Cell Quiescence in Cancer	6/36	0.121947	0.999887	0	0	1.90591	4.01036	ZFP36;PTPRB;CXCL8;REL;RELA;NFKB2
Adipokines and Cytokines in Insulin Resistance in Skeletal Muscles	8/53	0.126727	0.999887	0	0	1.69452	3.50041	SREBF1;ACSL1;ACOX1;IRS2;HMGCR;PPARA;PRKAB1;ACACA
TNF Receptor Associated Periodic Syndrome	6/37	0.134533	0.999887	0	0	1.84432	3.69961	LRRK2;EIF2AK3;BCL2;CYCS;ATF6;MTOR
SOD1 Mutation	5/29	0.135868	0.999887	0	0	1.98493	3.96206	HSPA5;DERL1;BCL2;XIAP;CYCS
NOTCH Receptors Signaling	5/29	0.135868	0.999887	0	0	1.98493	3.96206	JAG2;ADAM17;HEY1;NOTCH4;NEDD4
beta-Cell Dysfunction by Steroids in Diabetes Mellitus (Hypothesis)	2/7	0.137652	0.999887	0	0	3.80905	7.55345	PFKFB2;GCKR
CDKN2B-AS1 in Epigenetic Regulation of Glaucoma	2/7	0.137652	0.999887	0	0	3.80905	7.55345	CDKN2B;ATM
Dysgenesis of the Anterior Segment of the Eye in Glaucoma	2/7	0.137652	0.999887	0	0	3.80905	7.55345	TH;CYP1B1
Folate Cycle and Homocysteine Overproduction	2/7	0.137652	0.999887	0	0	3.80905	7.55345	MTHFR;MTR
Genes with Mutations Associated with Pregnancy Related Coagulation Disorders	2/7	0.137652	0.999887	0	0	3.80905	7.55345	PROS1;MTHFR
Proteins with Altered Expression in Androgenetic Alopecia	2/7	0.137652	0.999887	0	0	3.80905	7.55345	PTGS2;DKK1
Genes with Mutations Associated with Aging in Humans	3/14	0.141835	0.999887	0	0	2.59759	5.07332	CDKN2B;WRN;MTHFR
P2RXs -> Synaptic Transmission	3/14	0.141835	0.999887	0	0	2.59759	5.07332	P2RX7;P2RX1;SYT7
Hodgkin and Reed-Sternberg Cells in Hodgkin Lymphoma	3/14	0.141835	0.999887	0	0	2.59759	5.07332	CXCL8;FGF2;CCL28
NOTCH Signaling in Multiple Myeloma	3/14	0.141835	0.999887	0	0	2.59759	5.07332	JAG2;ADAM17;CXCL8
PNPLA3 in non-Alcoholic Fatty Liver Disease	3/14	0.141835	0.999887	0	0	2.59759	5.07332	CEBPA;SREBF1;IRS2
mTOR Signaling	11/81	0.144628	0.999887	0	0	1.49813	2.89678	SREBF1;RRAGC;AKT1S1;RRAGD;DDIT4L;IRS2;TSC1;PPARG;LPIN1;LAMTOR3;MTOR
Proteins Involved in Polycystic Ovary Syndrome	13/99	0.145075	0.999887	0	0	1.44137	2.78257	CEBPA;ACE;MMP1;IRS2;HMGCR;DKK1;KLF15;LIPE;AR;NAMPT;CEP70;PPARG;LPIN1
Proteins with Altered Expression in Aging	4/22	0.150849	0.999887	0	0	2.11685	4.00397	MTHFR;SPRY2;ATM;MTOR
Telomere Maintenance	4/22	0.150849	0.999887	0	0	2.11685	4.00397	RAD50;TNKS;POT1;ATM
Lymphoma, GCB Subtype	4/22	0.150849	0.999887	0	0	2.11685	4.00397	CDKN2B;BCL2;MTOR;ATR
Estrogens/ESR1 Genomic Canonical Signaling	4/22	0.150849	0.999887	0	0	2.11685	4.00397	BCL2;REL;ESR1;PELP1
Proteins with Altered Expression in Cancer-Associated Resisting to Cell Death	7/47	0.154865	0.999887	0	0	1.66763	3.11046	BCL2L11;BCL2;XIAP;TNFRSF10A;BIRC6;BIRC7;BIRC3
Proteins Involved in Diabetic Neuropathy	9/65	0.16153	0.999887	0	0	1.53175	2.79248	SREBF1;UNC13A;ACE;MPZ;OLR1;PPARG;PTGS2;LPIN1;RELA
A-cell (X-like): Ghrelin and Nesfatin-1 Synthesis	3/15	0.165429	0.999887	0	0	2.38099	4.2839	PPARG;MTOR;NUCB2
Vitamins Insufficiency Causes Homocysteine High Level Synthesis	3/15	0.165429	0.999887	0	0	2.38099	4.2839	SLC46A1;MTHFR;MTR
NFKB Non-Canonical Signaling Activation in Cancer	5/31	0.166921	0.999887	0	0	1.83204	3.27979	CAMLG;REL;RELA;NFKB2;BIRC3
mTOR Signaling Hyperfunction	7/48	0.16742	0.999887	0	0	1.62686	2.90761	PPP1R15A;RRAGC;AKT1S1;RRAGD;IRS2;TSC1;MTOR
Proteins Involved in Endometrioid Ovarian Carcinoma	7/48	0.16742	0.999887	0	0	1.62686	2.90761	BCL2;NRG1;ATM;FGF2;ESR1;MTOR;PELP1
Proteins Involved in Low-Grade Serous Ovarian Carcinoma	7/48	0.16742	0.999887	0	0	1.62686	2.90761	BCL2;NRG1;ATM;FGF2;ESR1;MTOR;PELP1
Macroautophagy Decline	4/23	0.169715	0.999887	0	0	2.00532	3.55671	MAP1LC3B;ATG101;BCL2;HMOX1
Werner Syndrome (Adult Progeria)	4/23	0.169715	0.999887	0	0	2.00532	3.55671	WRN;ATM;TP53BP1;ATR
Androgen Receptor/FKBP5 Signaling	2/8	0.172412	0.999887	0	0	3.17404	5.57953	AR;BCL2
beta-Cell Function Inhibition by Rapamycin (Rodent Model)	2/8	0.172412	0.999887	0	0	3.17404	5.57953	MAP1LC3B;MTOR
Estradiol Effects in Menstrual Migrane	2/8	0.172412	0.999887	0	0	3.17404	5.57953	TH;PTGS2
Glucocorticoid Resistance	2/8	0.172412	0.999887	0	0	3.17404	5.57953	CXCL8;RELA
POMC Activation in Keratinocytes	2/8	0.172412	0.999887	0	0	3.17404	5.57953	ATM;ATR
Proteins Involved in Peutz-Jeghers Syndrome	2/8	0.172412	0.999887	0	0	3.17404	5.57953	TSC1;PTGS2
Hereditary Breast and Ovarian Cancer Syndrome	5/32	0.183403	0.999887	0	0	1.76409	2.99202	RAD50;BRCA2;MLH1;MYSM1;ESR1
Androgen Deficiency in Male Obesity	4/24	0.189349	0.999887	0	0	1.90495	3.17015	CEBPA;AR;LIPE;PPARG
Insulin Influence on Lipogenesis	3/16	0.190066	0.999887	0	0	2.19772	3.64905	ACSL1;IRS2;GPAT3
Spindle Assembly	3/16	0.190066	0.999887	0	0	2.19772	3.64905	ESPL1;ZW10;MXD1
Aminoglycosides and Cisplatin Induced Ototoxicity (Mouse Model)	3/16	0.190066	0.999887	0	0	2.19772	3.64905	HRK;SLC31A1;CYCS
FAS Mediated Apoptosis in Systemic Scleroderma	3/16	0.190066	0.999887	0	0	2.19772	3.64905	CXCL8;BCL2;CYCS
Proteins Involved in Diabetes Mellitus Type 2	14/115	0.202598	0.999887	0	0	1.32131	2.10951	SREBF1;GCKR;ACE;GIPR;GFPT1;IRS2;CDKAL1;PTGS2;MTOR;NAMPT;PPARG;PPARA;ATF6;FGF21
Proteins Involved in Obesity	13/106	0.206127	0.999887	0	0	1.33236	2.10415	SREBF1;CEBPA;ACE;CXCL8;IRS2;PTGS2;ESR1;MTOR;AR;NAMPT;HMOX1;PPARG;PPARA
Scavenger Receptor OLR1 in Inflammation Related Endothelial Dysfunction	7/51	0.20757	0.999887	0	0	1.51569	2.38309	ARG2;CXCL8;ACE;MMP1;OLR1;ARHGEF1;CXCL2
Ubiquitin Ligase Complex in Prostata Cell	2/9	0.208363	0.999887	0	0	2.72045	4.26696	AR;ESR1
Proteins Involved in Polycystic Kidney Disease	12/97	0.209567	0.999887	0	0	1.34551	2.10264	NEK8;P2RX7;CEBPA;BCL2L11;ACE;TMEM67;BCL2;PKD2L1;TSC1;STX3;FNIP1;MTOR
Hypoxia Inhibits mTOR Signaling	4/25	0.209656	0.999887	0	0	1.81414	2.83421	AKT1S1;DDIT4L;TSC1;MTOR
Alveolar Epithelial Cell Apoptosis in COPD	4/25	0.209656	0.999887	0	0	1.81414	2.83421	MAP1LC3B;DDIT3;BCL2;CYCS
beta-Cell Recovery in Diabetes Mellitus	4/25	0.209656	0.999887	0	0	1.81414	2.83421	PFKFB2;GCKR;GIPR;PPARG
Vitamin C Related Norepinephrine Synthesis	3/17	0.215547	0.999887	0	0	2.04062	3.13149	ACE;TH;ADRA2C
G2/M Damage Checkpoint	3/17	0.215547	0.999887	0	0	2.04062	3.13149	ATM;TP53BP1;ATR
Histone Phosphorylation	3/17	0.215547	0.999887	0	0	2.04062	3.13149	RPS6KA5;ATM;ATR
Apoptosis of Mantle Cell Deregulation	3/17	0.215547	0.999887	0	0	2.04062	3.13149	BCL2L11;BCL2;XIAP
Genes with Mutations Associated with Systemic Scleroderma	3/17	0.215547	0.999887	0	0	2.04062	3.13149	ACE;CXCL8;PTPN22
Microglia Activation in Parkinson's Disease	3/17	0.215547	0.999887	0	0	2.04062	3.13149	NR4A2;LY96;PTGS2
Proteins Involved in Mucinous Ovarian Carcinoma	6/43	0.221213	0.999887	0	0	1.54473	2.33043	BCL2;NRG1;ATM;FGF2;ESR1;MTOR
Mitochondrial Dysfunction in Alzheimer's Disease	4/26	0.23054	0.999887	0	0	1.73158	2.54081	BCL2;CYP1B1;CYCS;ACAT1
Proteins Involved in non-Alcoholic Fatty Liver Disease	21/186	0.234875	0.999887	0	0	1.21339	1.75784	SREBF1;GCKR;DGAT2;ACE;CXCL8;ACSL1;INSIG1;IRS2;ELOVL6;PTGS2;ACACA;MTOR;SCD;FASN;HMOX1;PLIN2;PPARG;PPARA;LPIN1;NUCB2;FGF21
Androgen Receptor/Akt Signaling	5/35	0.236011	0.999887	0	0	1.58742	2.29204	AR;BCL2;CYCS;ESR1;MTOR
Proteins Involved in Erectile Dysfunction	6/44	0.237194	0.999887	0	0	1.504	2.16407	ARG2;ACE;ADORA2B;BCL2;HMOX1;FGF2
Androgens in Adipocyte Activation	3/18	0.241681	0.999887	0	0	1.90448	2.70461	CEBPA;AR;PPARG
Epigenetic Alterations Triggers Genomic Instability	3/18	0.241681	0.999887	0	0	1.90448	2.70461	SLC46A1;MTHFR;MTR
Mitochondrial DNA Replication and Transcription	3/18	0.241681	0.999887	0	0	1.90448	2.70461	LONP1;TFB2M;POLRMT
Genes with Mutations Associated with Breast Cancer	2/10	0.244963	0.999887	0	0	2.38026	3.34819	BRCA2;MLH1
SNS Related Adrenal Cortex Response	4/27	0.251904	0.999887	0	0	1.65621	2.28342	ACE;TH;ADRA2C;RAPGEF3
Histone Sumoylation	3/19	0.268288	0.999887	0	0	1.78535	2.34897	HDAC4;RANBP2;RCOR1
Proteins with Altered Expression in Amyotrophic Lateral Sclerosis	3/19	0.268288	0.999887	0	0	1.78535	2.34897	HSPA5;BCL2;PPARG
Genes with Mutations in Cancer Metabolic Reprogramming	3/19	0.268288	0.999887	0	0	1.78535	2.34897	MPC1;TSC1;RELA
Proteins with Altered Expression in Cancer-Associated Enabling of Replicative Immortality	3/19	0.268288	0.999887	0	0	1.78535	2.34897	REL;ESR1;ATR
Oncogene Induced Cellular Senescence	6/46	0.270122	0.999887	0	0	1.42864	1.86992	AKT1S1;SPRY2;TSC1;ATM;MTOR;ATR
Proteins Involved in Cholesteatoma	5/37	0.273139	0.999887	0	0	1.48804	1.93114	CYLD;BMP2;CXCL8;HSPA5;PPARG
PHOX2B Effects in Neuroblastoma	4/28	0.273655	0.999887	0	0	1.58711	2.05671	ADAM17;BMP2;HEY1;TH
Proteins with Altered Expression in Prostate Cancer	4/28	0.273655	0.999887	0	0	1.58711	2.05671	AR;FASN;BCL2;PTGS2
Glutamine in Cancer Metabolism	4/28	0.273655	0.999887	0	0	1.58711	2.05671	GOT1;SLC7A11;SLC38A5;MTOR
ERBB2/3 -> EP300/ETS/ETV/SP1 Signaling	4/28	0.273655	0.999887	0	0	1.58711	2.05671	RPS6KA5;ETV1;NRG1;ETV4
NF-kB non-Canonical Signaling	4/28	0.273655	0.999887	0	0	1.58711	2.05671	CAMLG;REL;RELA;NFKB2
Immunoglobulin Class-Switch Recombination via Alternative End-Joining	2/11	0.281765	0.999887	0	0	2.11567	2.67989	MDC1;TP53BP1
Androgen Receptor/SGK1 Signaling	2/11	0.281765	0.999887	0	0	2.11567	2.67989	AR;MTOR
EPHA2 Mutations in Cataract	2/11	0.281765	0.999887	0	0	2.11567	2.67989	AFDN;EPB41
Proteins Involved in Muscular Dystrophy, Facioscapulohumeral	2/11	0.281765	0.999887	0	0	2.11567	2.67989	SMCHD1;KLF15
Proteins Involved in Raynaud Disease	2/11	0.281765	0.999887	0	0	2.11567	2.67989	ACE;ADRA2C
RNase L Signaling in Prostate Cancer	2/11	0.281765	0.999887	0	0	2.11567	2.67989	AR;GDF15
SERPINA1 Associated Pulmonary Emphysema	2/11	0.281765	0.999887	0	0	2.11567	2.67989	FGF2;JMJD6
Tricarboxylic Acid Cycle Enzymes Involvement in Alzheimer Disease	2/11	0.281765	0.999887	0	0	2.11567	2.67989	CYCS;ACAT1
Osteoclast Activation in Psoriatic Arthritis	6/47	0.286989	0.999887	0	0	1.39372	1.73979	REL;XIAP;ACP5;RELA;NFKB2;BIRC3
SCF/FBXW7 Complex	3/20	0.295199	0.999887	0	0	1.68023	2.05007	HUWE1;MTOR;NFKB2
Proteins Involved in Hyperprolactinemia	3/20	0.295199	0.999887	0	0	1.68023	2.05007	ACE;TH;LIF
EphrinB -> Cytoskeleton Signaling	3/20	0.295199	0.999887	0	0	1.68023	2.05007	AFDN;EFNA3;EPB41
Hyperseborrhea in Acne Vulgaris	4/29	0.295701	0.999887	0	0	1.52354	1.85629	SREBF1;IRS2;PPARG;PPARA
NOTCH Signaling Deregulation in Cancer	4/29	0.295701	0.999887	0	0	1.52354	1.85629	JAG2;ADAM17;HEY1;NOTCH4
Proteins Involved in High-Grade Serous Ovarian Carcinoma	7/57	0.296627	0.999887	0	0	1.33336	1.62041	BCL2;NRG1;ATM;BRCA2;MLH1;FGF2;MTOR
Proteins Involved in Osteoarthritis	10/86	0.300069	0.999887	0	0	1.25334	1.5087	BMP2;CXCL8;MMP1;NAMPT;MATN1;COL10A1;PPARG;PTGS2;FGF2;PTHLH
Proteins Involved in Diabetic Nephropathy	19/175	0.306088	0.999887	0	0	1.16051	1.37391	SREBF1;ARG2;ACE;CXCL8;MME;MTHFR;HMGCR;PTGS2;FGF2;DKK1;MTOR;ADAM17;NAMPT;COL4A3;HMOX1;PPARG;PPARA;SH2B2;FGF21
Hair Follicle Keratinocyte Apoptosis	5/39	0.311367	0.999887	0	0	1.40035	1.63391	BCL2L11;FZD5;BCL2;PTGS2;DKK1
Podocyte Dysfunction in Diabetic Nephropathy	5/39	0.311367	0.999887	0	0	1.40035	1.63391	COL4A4;COL4A3;BCL2;CYCS;PPARA
Thyroid Hormones in Adipose Tissue Metabolism	4/30	0.317954	0.999887	0	0	1.46486	1.67851	SREBF1;FASN;PPARG;ACACA
TNFR/NF-kB Classical Pathway in Multiple Myeloma Plasma Cells	4/30	0.317954	0.999887	0	0	1.46486	1.67851	CYLD;CXCL8;BCL2;RELA
Persistent Double Strand DNA Homologous Repair in Cancer	4/30	0.317954	0.999887	0	0	1.46486	1.67851	MDC1;RAD50;ATM;BRCA2
Fatty Acids Cause Oxidative Stress and Mitochondria Decline in Aging	2/12	0.318399	0.999887	0	0	1.904	2.17903	SREBF1;PPARA
BMP2 and Non-Canonical WNT Signaling in Pulmonary Artery Endothelial Cells	2/12	0.318399	0.999887	0	0	1.904	2.17903	BMP2;BMPR1B
Telomeric Proteins/NFKB Positive Feedback Interplay in Cancer	2/12	0.318399	0.999887	0	0	1.904	2.17903	REL;RELA
mTOR Signaling Activation by Fatty Acids and Glucose	6/49	0.321326	0.999887	0	0	1.32875	1.50852	RALA;AKT1S1;IRS2;TSC1;GPAT3;MTOR
Insulin Resistance in Hepatocytes	6/49	0.321326	0.999887	0	0	1.32875	1.50852	SREBF1;ACSL1;ACOX1;IRS2;PPARA;MTOR
Proerythroblast -> Erythrocyte Surface Expression Markers	6/49	0.321326	0.999887	0	0	1.32875	1.50852	P2RX7;TFRC;MTHFR;RHCE;CD55;EPOR
MEN1 Mutation in Hyperparathyroidism	3/21	0.322257	0.999887	0	0	1.5868	1.7969	RPA2;RELA;NFKB2
Breast Cancer	12/108	0.32968	0.999887	0	0	1.19061	1.32114	JAG2;ADAM17;RAD50;TCF7;BCL2;CYCS;TNFRSF10A;NRG1;BRCA2;MLH1;MYSM1;MTOR
Proteins Involved in Osteopetrosis	5/40	0.33075	0.999887	0	0	1.36027	1.50499	CLCN7;OSTM1;ACP5;PPARG;GAB2
Proteins Involved in Endometrial Cancer	6/50	0.338717	0.999887	0	0	1.29848	1.40572	CLDN3;FZD5;BCL2;ATM;MLH1;ESR1
Proteins Involved in Otitis Media	4/31	0.340329	0.999887	0	0	1.41053	1.52033	CXCL8;CHD7;NEU1;PTGS2
Proteins Involved in Prolactinoma	4/31	0.340329	0.999887	0	0	1.41053	1.52033	TH;LIF;FGF2;ESR1
Genes with Mutations in Cancer-Associated Resisting to Cell Death	4/31	0.340329	0.999887	0	0	1.41053	1.52033	BCL2L11;BCL2;TNFRSF10A;BIRC3
Proteins Involved in Female Infertility	7/60	0.34395	0.999887	0	0	1.25768	1.34227	PDE4D;LIF;MTHFR;IRS2;PTGS2;MLH1;ESR1
SIRT2 Signaling in Aging	3/22	0.349322	0.999887	0	0	1.5032	1.58101	NAMPT;FOXO4;RELA
Low-Density Lipoproteins and Chemokines in Atherosclerosis	3/22	0.349322	0.999887	0	0	1.5032	1.58101	PPARG;TLR6;ACAT1
OPTN Associated Glaucoma	3/22	0.349322	0.999887	0	0	1.5032	1.58101	CYLD;CYCS;TBC1D17
TNFR/NF-kB Alternative Pathway in Multiple Myeloma Plasma Cells	3/22	0.349322	0.999887	0	0	1.5032	1.58101	CXCL8;BCL2;NFKB2
Transcytosis	5/41	0.350241	0.999887	0	0	1.32241	1.38738	CLCN5;CLCN4;TFRC;LAMP3;ATP6V1C1
Megakaryocyte -> Platelet Precursor Cell Surface Expression Markers	5/41	0.350241	0.999887	0	0	1.32241	1.38738	TFRC;ICAM2;EPOR;LAT;F2RL3
Scavenger Receptors in Platelet Aggregation	2/13	0.354564	0.999887	0	0	1.73081	1.79462	OLR1;CD68
Hyperhomocysteinemia Induced Thrombophilia	2/13	0.354564	0.999887	0	0	1.73081	1.79462	MTHFR;MTR
MTHFR Mutation, Hyperhomocysteinemia and Folate Deficiency	2/13	0.354564	0.999887	0	0	1.73081	1.79462	MTHFR;MTR
Progesterone Resistance in Endometriosis	2/13	0.354564	0.999887	0	0	1.73081	1.79462	BCL2L11;CRABP2
Proteins Involved in Marginal Zone Lymphoma	2/13	0.354564	0.999887	0	0	1.73081	1.79462	BCL2;BIRC3
Proteins Involved in Werner Syndrome (Adult Progeria)	2/13	0.354564	0.999887	0	0	1.73081	1.79462	WRN;ATM
Retinoic Acid Role in Endometriosis	2/13	0.354564	0.999887	0	0	1.73081	1.79462	CRABP2;CYP1B1
Ca2+ Cytosolic Overload	2/13	0.354564	0.999887	0	0	1.73081	1.79462	ATP8A1;CYCS
Apoptosis Block by Death Receptor Signaling in Cancer	6/51	0.356203	0.999887	0	0	1.26955	1.3105	BCL2;REL;XIAP;CYCS;TNFRSF10A;BIRC3
Proteins Involved in Diffuse Large-B-Cell Lymphoma	7/61	0.359939	0.999887	0	0	1.23432	1.26126	HDAC4;KMT2A;FASN;BCL2;REL;XIAP;ATM
Proteins Involved in Amyotrophic Lateral Sclerosis	19/181	0.360358	0.999887	0	0	1.11716	1.14023	HSPA5;LRRK2;MTHFR;XIAP;ANK2;NRG1;PTGS2;ACVR2B;HDAC6;P2RX7;BCL2L11;VGF;GPNMB;DDIT3;BCL2;CYCS;ANG;P4HB;PRPH
NOD-like Receptors	4/32	0.362747	0.999887	0	0	1.36008	1.37919	P2RX7;BCL2;NOD2;NLRP1
Apoptosis Block in Acute Myeloid Leukemia Cell	4/32	0.362747	0.999887	0	0	1.36008	1.37919	PPP1R15A;KMT2A;BCL2;XIAP
FOXO1 and SREBP-1C Role in beta-Cell Suppression (Rodent Model)	4/32	0.362747	0.999887	0	0	1.36008	1.37919	SREBF1;HMOX1;IRS2;SH2B2
Sertoli Cells Dysfunction Causes Male Infertility	4/32	0.362747	0.999887	0	0	1.36008	1.37919	AR;OCLN;ACE;PTGS2
ROS in Triggering Vascular Inflammation	4/32	0.362747	0.999887	0	0	1.36008	1.37919	CXCL8;ACE;PTGS2;CXCL2
HIF1A in Vasculogenic Mimicry of Cancer	5/42	0.369786	0.999887	0	0	1.2866	1.27995	JAG2;ADAM17;NOTCH4;PTGS2;ACVR2B
Tight Junction Assembly (Claudins)	3/23	0.376263	0.999887	0	0	1.42796	1.39579	AFDN;PARD6A;EPB41
Tight Junction Assembly (JAMs)	3/23	0.376263	0.999887	0	0	1.42796	1.39579	AFDN;PARD6A;EPB41
beta-Cell Function Inhibition by Ciclosporine and Tacrolimus (Rodent Model)	3/23	0.376263	0.999887	0	0	1.42796	1.39579	SREBF1;BCL2;IRS2
Proteins with Altered Expression in Endometrial Cancer	3/23	0.376263	0.999887	0	0	1.42796	1.39579	CLDN3;ESR1;FGF2
Hypoxia-Induced Cell Death Evasion in Cancer	3/23	0.376263	0.999887	0	0	1.42796	1.39579	BCL2;CYCS;BIRC3
TERT/WNT Activation in Cancer	3/23	0.376263	0.999887	0	0	1.42796	1.39579	CSNK2A1;KLF4;GNL3
DNA Repair and Chromatin Remodeling Block in Pancreatic Neoplasms	4/33	0.385133	0.999887	0	0	1.31311	1.25292	RAD50;BRCA2;MLH1;MYSM1
Estrogens in Prolactin Production	2/14	0.390019	0.999887	0	0	1.58649	1.49378	ESR1;FGF2
Oxidative Stress in Amyotrophic Lateral Sclerosis	2/14	0.390019	0.999887	0	0	1.58649	1.49378	HMOX1;PPARG
Huntingtin Mutant Protein Toxicity Effects	2/14	0.390019	0.999887	0	0	1.58649	1.49378	ACBD3;MTOR
Microglia Activation in Alzheimer's Disease	2/14	0.390019	0.999887	0	0	1.58649	1.49378	LY96;PTGS2
ESR1/ERBB Positive Luminal Breast Cancer	10/93	0.390843	0.999887	0	0	1.14719	1.07773	RAD50;TCF7;BCL2;CYCS;NRG1;BRCA2;MLH1;MYSM1;ESR1;MTOR
ADORA2A/B -> Vasodilation	1/5	0.393291	0.999887	0	0	2.37954	2.2206	ADORA2B
CHRNA7 -> IL8 Production	1/5	0.393291	0.999887	0	0	2.37954	2.2206	CXCL8
Androgen Receptor/c-Met Signaling in Prostate Cancer	1/5	0.393291	0.999887	0	0	2.37954	2.2206	AR
Genes with Mutations Associated with Osteoporosis	1/5	0.393291	0.999887	0	0	2.37954	2.2206	ESR1
Proteins with Altered Expression in Parkinson's Disease	1/5	0.393291	0.999887	0	0	2.37954	2.2206	PTGS2
Proteins with Altered Expression in Pyelonephritis	1/5	0.393291	0.999887	0	0	2.37954	2.2206	CXCL8
Metabolism of Estrogens and Androgens	1/5	0.393291	0.999887	0	0	2.37954	2.2206	CYP1B1
Metabolism of Glycerophospholipids and Ether Lipids	1/5	0.393291	0.999887	0	0	2.37954	2.2206	GPAT3
beta-Cell Granules Exocytois	3/24	0.402965	0.999887	0	0	1.35989	1.23601	UNC13A;ARFGEF3;RAPGEF3
Tight Junction Assembly (Occludin)	3/24	0.402965	0.999887	0	0	1.35989	1.23601	AFDN;OCLN;EPB41
Adiponectin in Insulin Resistance Prevention	3/24	0.402965	0.999887	0	0	1.35989	1.23601	SREBF1;ACOX1;PPARA
Amyloid beta Traffic and Degradation in Extracellular Matrix in Alzheimer's Disease	3/24	0.402965	0.999887	0	0	1.35989	1.23601	ACE;MME;TFRC
IL6 and Insulin Resistance in Muscular Dystrophies	3/24	0.402965	0.999887	0	0	1.35989	1.23601	LIPE;IRS2;MTOR
NOTCH Signaling in Hepatocellular Carcinoma	3/24	0.402965	0.999887	0	0	1.35989	1.23601	JAG2;ADAM17;MYSM1
Proteins with Altered Expression in Asthma	3/24	0.402965	0.999887	0	0	1.35989	1.23601	CXCL8;TSLP;CCL26
TAM Receptor Signaling Activation in Cancer	8/74	0.407003	0.999887	0	0	1.15401	1.03738	AR;CXCL8;PROS1;BCL2;MZF1;CXCL2;ESR1;MTOR
Proteins Involved in Acute Myeloid Leukemia	4/34	0.407416	0.999887	0	0	1.26927	1.1397	CEBPA;CDKN2B;KMT2A;BCL2
Cetuximab Resistance in Colorectal Cancer	7/64	0.408147	0.999887	0	0	1.16916	1.04772	DUSP4;ADAM17;FABP3;PIKFYVE;NRG1;PTGS2;MTOR
Insulin Signaling	6/54	0.408865	0.999887	0	0	1.19001	1.06431	LIPE;SREBF1;FASN;IRS2;SH2B2;MTOR
Histidine-Rich Glycoprotein (HRG)	2/15	0.424571	0.999887	0	0	1.46437	1.25449	F12;FGF2
N-cell: Neurotensin Production	2/15	0.424571	0.999887	0	0	1.46437	1.25449	ACE;MME
Single-Strand Base Excision	2/15	0.424571	0.999887	0	0	1.46437	1.25449	FEN1;LIG1
Androgens Synthesis in Sebocytes	2/15	0.424571	0.999887	0	0	1.46437	1.25449	AR;HMGCR
Cathepsins Role in Periodontitis	2/15	0.424571	0.999887	0	0	1.46437	1.25449	MMP1;JMJD6
Estrogen Effects in Mitochondria in Alzheimer Disease	2/15	0.424571	0.999887	0	0	1.46437	1.25449	BCL2;CYP1B1
KISS1 Production Impairment in Hypogonadotropic hypogonadism	2/15	0.424571	0.999887	0	0	1.46437	1.25449	AR;ESR1
Mitochondria Enlargement and Apoptosis in Alzheimer's Disease	2/15	0.424571	0.999887	0	0	1.46437	1.25449	BCL2;CYCS
Deacetylases Activation in Histone Deacetylation in Cancer	2/15	0.424571	0.999887	0	0	1.46437	1.25449	HDAC4;HDAC6
Genes with Mutations in Cancer-Associated Histone Methylation	2/15	0.424571	0.999887	0	0	1.46437	1.25449	KMT2A;KMT2C
Lipids Enhance Apoptotic Cell Engulfment and Reduce Inflammation	3/25	0.429325	0.999887	0	0	1.298	1.09752	SREBF1;CXCL8;PPARG
Proteins Involved in Chronic Bronchitis	3/25	0.429325	0.999887	0	0	1.298	1.09752	CXCL8;CYP1B1;CXCL2
Proteins Involved in Frontotemporal Dementia	3/25	0.429325	0.999887	0	0	1.298	1.09752	TH;TMEM106B;SQSTM1
PI3K/AKT/MTOR Signaling Activation by Blocking of Tumor Suppressors	3/25	0.429325	0.999887	0	0	1.298	1.09752	NEDD4;TSC1;MTOR
NOTCH1 Signaling in Breast Cancer	4/35	0.429533	0.999887	0	0	1.22825	1.03794	JAG2;ADAM17;TCF7;MYSM1
Preconditioning Ischemia	4/35	0.429533	0.999887	0	0	1.22825	1.03794	TSC1;PTGS2;ACACA;MTOR
Proteins Involved in Inflammatory Bowel Diseases	7/66	0.440216	0.999887	0	0	1.1294	0.926663	CXCL8;HMOX1;PPARG;TLR6;NOD2;PPARA;PTGS2
Proteins Involved in Clear Cell Ovarian Carcinoma	5/46	0.447541	0.999887	0	0	1.16082	0.933282	BCL2;ATM;ESR1;MTOR;PELP1
Proteins with Altered Expression in Melanoma	5/46	0.447541	0.999887	0	0	1.16082	0.933282	CXCL8;MMP1;NOTCH4;BCL2;BIRC7
Suppression of Caspase Activity in Cancer	5/46	0.447541	0.999887	0	0	1.16082	0.933282	XIAP;CYCS;BIRC6;BIRC7;BIRC3
Eicosanoids in Inflammation	1/6	0.451003	0.999887	0	0	1.90352	1.51574	PTGS2
Endogenous Peptide Antigen Presentation	1/6	0.451003	0.999887	0	0	1.90352	1.51574	HSPA5
Ion Channels of Stomach in Appetite Regulation	1/6	0.451003	0.999887	0	0	1.90352	1.51574	ASIC3
Prolactin Induced Dopamin Synthesis by TIDA Neurons (Negative Feedback)	1/6	0.451003	0.999887	0	0	1.90352	1.51574	TH
Prostaglandins Role in Sleep Regulation	1/6	0.451003	0.999887	0	0	1.90352	1.51574	PTGS2
Genes with Mutations Associated with Frontotemporal Dementia	1/6	0.451003	0.999887	0	0	1.90352	1.51574	TMEM106B
Genes with Mutations Associated with Urea Cycle Disorders	1/6	0.451003	0.999887	0	0	1.90352	1.51574	ASS1
Hyperosmotic Stress in Diabetic Neuropathy	1/6	0.451003	0.999887	0	0	1.90352	1.51574	SLC5A3
NO and ADMA Signaling in Raynaud Disease	1/6	0.451003	0.999887	0	0	1.90352	1.51574	ARG2
Proteins Involved in alpha 1-Antitrypsin Deficiency	1/6	0.451003	0.999887	0	0	1.90352	1.51574	SELENOS
Proteins with Altered Expression in Erectile Dysfunction	1/6	0.451003	0.999887	0	0	1.90352	1.51574	ARG2
Cocaine Induced Hepatotoxicity	1/6	0.451003	0.999887	0	0	1.90352	1.51574	CYCS
Valdecoxib Induced Ischemic Disease	1/6	0.451003	0.999887	0	0	1.90352	1.51574	PTGS2
Aryl Hydrocarbon Receptor/Arachidonic Acid Metabolites Signaling	1/6	0.451003	0.999887	0	0	1.90352	1.51574	PTGS2
NOTCH -> LEF1 Signaling	1/6	0.451003	0.999887	0	0	1.90352	1.51574	ADAM17
NOTCH -> SMAD3 Signaling	1/6	0.451003	0.999887	0	0	1.90352	1.51574	ADAM17
Proteins Involved in Chronic Obstructive Pulmonary Disease	17/170	0.451398	0.999887	0	0	1.05777	0.841353	IL32;CXCL8;TSLP;MMP1;PDE4D;NOD2;PTGS2;FGF2;HDAC6;ADAM17;ADORA2B;NAMPT;COL4A3;HMOX1;PPARG;TLR6;NFKBIB
Apoptosis Block in Synovial Fibroblast	4/36	0.451424	0.999887	0	0	1.18981	0.94631	BCL2;CYCS;TNFRSF10A;BIRC3
EPCAM in Cancer Cell Motility and Proliferation	4/36	0.451424	0.999887	0	0	1.18981	0.94631	ADAM17;CSNK2A1;CLDN1;DKK1
Apoptosis	8/77	0.451646	0.999887	0	0	1.10365	0.877245	BCL2L11;HUWE1;BCL2;XIAP;CYCS;TNFRSF10A;ATM;BIRC3
SIRT3 Signaling in Aging	3/26	0.455253	0.999887	0	0	1.2415	0.976938	ACSL1;NAMPT;NDUFS1
APP and Glutamate Signaling Cause Neuronal Dysfunction in Alzheimer Disease	3/26	0.455253	0.999887	0	0	1.2415	0.976938	BCL2;CYCS;LRP8
OPTN Effects on NF-kB Signaling in Glaucoma	3/26	0.455253	0.999887	0	0	1.2415	0.976938	CYLD;BCL2;CYCS
Alzheimer's Disease	7/67	0.456153	0.999887	0	0	1.11052	0.871675	ERN1;ACE;MME;EIF2AK3;CYCS;ATF6;LRP8
Proteins Involved in Parkinson's Disease	10/98	0.456764	0.999887	0	0	1.08171	0.847614	NR4A2;BAG5;ACE;TH;LRRK2;HMOX1;ATM;HMGCR;PTGS2;GIGYF2
Vitamin K Metabolism	2/16	0.458072	0.999887	0	0	1.3597	1.06156	GGCX;PROS1
CDC73 Mutations Cause Hyperparathyroidism	2/16	0.458072	0.999887	0	0	1.3597	1.06156	KMT2A;PAF1
Genes with Mutations Associated with Glaucoma	2/16	0.458072	0.999887	0	0	1.3597	1.06156	WDR36;CYP1B1
Muscular Dystrophy, Facioscapulohumeral	2/16	0.458072	0.999887	0	0	1.3597	1.06156	AR;SMCHD1
Paneth-Cell Function in Crohn's Disease	2/16	0.458072	0.999887	0	0	1.3597	1.06156	CXCL8;NOD2
Tamoxifen Induced Endometrial Cancer	2/16	0.458072	0.999887	0	0	1.3597	1.06156	ESR1;PELP1
NOTCH -> RBPJ/HES/HEY Signaling	2/16	0.458072	0.999887	0	0	1.3597	1.06156	ADAM17;HEY1
Proteins Involved in Colorectal Neoplasms	10/99	0.469864	0.999887	0	0	1.06949	0.807803	CXCL8;MMP1;GDF15;BCL2;MTHFR;PPARG;PTGS2;MLH1;CLDN1;MTOR
Dectin-1 (CLEC7A) Signaling	3/27	0.480672	0.999887	0	0	1.18971	0.871542	REL;RELA;NFKB2
Ketogenic Diet Mechanism (Hypothesis)	3/27	0.480672	0.999887	0	0	1.18971	0.871542	TSC1;PPARA;MTOR
Reperfusion Injury in Myocardial ischemia	3/27	0.480672	0.999887	0	0	1.18971	0.871542	BCL2L11;BCL2;CYCS
Cancer Cells Inhibit Adipocyte Differentiation	3/27	0.480672	0.999887	0	0	1.18971	0.871542	CEBPA;FZD5;PPARG
ActivinR/BMPR -> SMAD1/5/9 Signaling	3/27	0.480672	0.999887	0	0	1.18971	0.871542	BMP2;BMPR1B;ACVR2B
Proteins Involved in Glomerulonephritis	12/121	0.484164	0.999887	0	0	1.04785	0.760041	P2RX7;CXCL8;FTH1;COL4A3;C5AR1;LIF;PPARA;PTGS2;CERT1;ESR1;CXCL2;CD55
Osteoclast Activation in Multiple Myeloma	7/69	0.487716	0.999887	0	0	1.07458	0.77157	JAG2;ADAM17;BCL2;ACP5;DKK1;MTOR;OSCAR
Find me Signal: Apoptotic Cell Attracts Phagocyte	2/17	0.490409	0.999887	0	0	1.26898	0.904171	ADAM17;CXCL8
Androgen Receptor and Cell Cycle in Prostate Cancer	2/17	0.490409	0.999887	0	0	1.26898	0.904171	AR;MTOR
Melanocyte Role in Skin Aging	2/17	0.490409	0.999887	0	0	1.26898	0.904171	BCL2;BIRC7
mTOR Hyperactivation after Status Epilepticus	2/17	0.490409	0.999887	0	0	1.26898	0.904171	TSC1;MTOR
Oxytocin Signaling in Brain Nerve Cell (Hypothesis)	2/17	0.490409	0.999887	0	0	1.26898	0.904171	BCL2;FOSB
Vascularization in Hepatocellular Carcinoma	2/17	0.490409	0.999887	0	0	1.26898	0.904171	PDGFC;ANG
Dexamethasone Induced Neurotoxicity	2/17	0.490409	0.999887	0	0	1.26898	0.904171	DKK1;HDAC6
Single Strand Base Excision DNA Repair Impairment in Cancer	2/17	0.490409	0.999887	0	0	1.26898	0.904171	FEN1;LIG1
TGFBR -> ATF/GADD/MAX/TP53 Signaling	2/17	0.490409	0.999887	0	0	1.26898	0.904171	MAX;DDIT3
VEGFA/NOTCH1/WNT Cross-talk in Blood Vessel Sprouting and Branching in Cancer	4/38	0.494315	0.999887	0	0	1.11969	0.788915	ADAM17;HEY1;CSNK2A1;FZD5
Dedifferentiation and Metastatic Progression in Melanoma	4/38	0.494315	0.999887	0	0	1.11969	0.788915	JAG2;ADAM17;FZD5;NOTCH4
Bone Remodeling in Hyperthyroidism	6/59	0.495289	0.999887	0	0	1.07744	0.757025	BMP2;COL10A1;DKK1;ESR1;RAPGEF3;PTHLH
GPR3 in Oocyte Meiotic Arrest	1/7	0.503228	0.999887	0	0	1.58618	1.08925	GPR3
SCF/CCNF Complex	1/7	0.503228	0.999887	0	0	1.58618	1.08925	CCP110
Ca2+ Absorption Decline in Intestine in Osteoporosis	1/7	0.503228	0.999887	0	0	1.58618	1.08925	ESR1
Ca2+ Reabsorption Decline in Kidney	1/7	0.503228	0.999887	0	0	1.58618	1.08925	ESR1
Genes with Mutations Associated with Ovarian Cancer	1/7	0.503228	0.999887	0	0	1.58618	1.08925	BRCA2
Glutamate Role in Parkinson's Disease	1/7	0.503228	0.999887	0	0	1.58618	1.08925	CYCS
NOTCH -> MEF/MYOD Signaling	1/7	0.503228	0.999887	0	0	1.58618	1.08925	ADAM17
MTOR/TP53 Regulates Cell Metabolism	3/28	0.505514	0.999887	0	0	1.14205	0.779085	FASN;LPIN1;MTOR
CFTR Related Ion-Channel Dysfunction in Cystic Fibrosis Airway Epithelium (Class III Mutations)	3/28	0.505514	0.999887	0	0	1.14205	0.779085	CXCL8;ADORA2B;ASIC3
Proteins Involved in Stem Cell Exhaustion in Aging	4/39	0.515224	0.999887	0	0	1.08764	0.721273	CXCL8;PPARG;FGF2;MTOR
Aryl Hydrocarbon Receptor Genomic and non-Genomic Signaling	4/39	0.515224	0.999887	0	0	1.08764	0.721273	AR;CYP1B1;PTGS2;ESR1
Single-Strand Nucleotide Excision	2/18	0.521499	0.999887	0	0	1.18961	0.774489	LIG1;ERCC5
Sister Chromatid Cohesion	2/18	0.521499	0.999887	0	0	1.18961	0.774489	ESCO1;ESPL1
FOXA2 Signaling in Prostate Cancer	2/18	0.521499	0.999887	0	0	1.18961	0.774489	AR;GDF15
FOXL2 Mutation in Ovarian Dysgenesis	2/18	0.521499	0.999887	0	0	1.18961	0.774489	PTGS2;ATF3
Oxidative Stress, All-Trans-Retinal and Lipofuscin Toxicity in AMD	2/18	0.521499	0.999887	0	0	1.18961	0.774489	BCL2;HMOX1
Proteins Involved in Adhesion, Migration and Invasion of Endometriotic Cell	2/18	0.521499	0.999887	0	0	1.18961	0.774489	CXCL8;MMP1
Proteins Involved in Cryptorchidism	2/18	0.521499	0.999887	0	0	1.18961	0.774489	AR;ESR1
Methylases in Histone Methylation Cancer	2/18	0.521499	0.999887	0	0	1.18961	0.774489	KMT2A;KMT2C
Proteins Involved in Acne Vulgaris	5/50	0.522612	0.999887	0	0	1.0574	0.686164	AR;CXCL8;MME;SCD;PTGS2
Apoptosis of Melanocyte in Vitiligo	3/29	0.529723	0.999887	0	0	1.09807	0.697713	BCL2;CYCS;PTPN22
Primary Mediastinal B-cell Lymphoma (PMBL) Subtype	3/29	0.529723	0.999887	0	0	1.09807	0.697713	CD274;CDKN2B;BCL2
SPP1 Induced Survival of Myelin Specific T-Cells in Multiple Sclerosis	3/29	0.529723	0.999887	0	0	1.09807	0.697713	BCL2L11;BCL2;CYCS
Toll-like Receptors (TLR) in Periodontitis	3/29	0.529723	0.999887	0	0	1.09807	0.697713	CXCL8;LY96;TLR6
Proteins Involved in T-Cell Acute Lymphoblastic Leukemia	4/40	0.535721	0.999887	0	0	1.05737	0.659949	KMT2A;BCL2;ATM;MTOR
Apoptosis Block by BCL2 Family Proteins in Cancer	4/40	0.535721	0.999887	0	0	1.05737	0.659949	HRK;BCL2L11;BCL2;CYCS
VEGFA Dependent Angiogenesis in Cancer	6/62	0.545067	0.999887	0	0	1.01955	0.618711	AR;RALA;HMOX1;PPARG;FGF2;ESR1
Ghrelin and Nesfatin-1 Regulate Stomach Functional State and Satiety	1/8	0.550488	0.999887	0	0	1.35951	0.81156	NUCB2
TAM Receptors in Platelet Aggregation	1/8	0.550488	0.999887	0	0	1.35951	0.81156	PROS1
Testicular AMH Production	1/8	0.550488	0.999887	0	0	1.35951	0.81156	AR
Metaphase/Anaphase Phase Transition	1/8	0.550488	0.999887	0	0	1.35951	0.81156	ESPL1
ADK Expression Downregulation after Acute Seizures	1/8	0.550488	0.999887	0	0	1.35951	0.81156	ADK
ADK Expression Upregulation	1/8	0.550488	0.999887	0	0	1.35951	0.81156	ADK
Androgen Receptor Coregulator ARA55 (TGFB1I1) in Prostate Cancer	1/8	0.550488	0.999887	0	0	1.35951	0.81156	AR
Androgen Receptor/Beta-2-Microglobulin Signaling in Prostate Cancer	1/8	0.550488	0.999887	0	0	1.35951	0.81156	AR
Dentin Formation in Rothmund-Thomson Syndrome	1/8	0.550488	0.999887	0	0	1.35951	0.81156	RECQL4
HPRT1 Deficiency in Lesch-Nyhan Syndrome	1/8	0.550488	0.999887	0	0	1.35951	0.81156	TH
Proteins Involved in Tangier Disease	1/8	0.550488	0.999887	0	0	1.35951	0.81156	ABCA3
Timothy Syndrome	1/8	0.550488	0.999887	0	0	1.35951	0.81156	TH
Genes with Mutations in Cancer Metabolic Reprogramming (Krebs Cycle)	1/8	0.550488	0.999887	0	0	1.35951	0.81156	IDH1
NOTCH -> EP300/ASCL Signaling	1/8	0.550488	0.999887	0	0	1.35951	0.81156	ADAM17
NPR1/NPR2 -> Fatty Acid Signaling	1/8	0.550488	0.999887	0	0	1.35951	0.81156	LIPE
PDGFR -> FOXO3A Signaling	1/8	0.550488	0.999887	0	0	1.35951	0.81156	PDGFC
Macrophage Related Iron Uptake and Release	2/19	0.551289	0.999887	0	0	1.11957	0.666697	TFRC;SLC11A2
rRNA Transcription and Processing	2/19	0.551289	0.999887	0	0	1.11957	0.666697	BRF2;TAF1A
Apoptosis of Myocyte	2/19	0.551289	0.999887	0	0	1.11957	0.666697	CYCS;TNFRSF10A
Apoptosis of Thyroid Cell in Hashimoto's Thyroiditis	2/19	0.551289	0.999887	0	0	1.11957	0.666697	BCL2;CYCS
Genes with Susceptibility for Crohn's Disease and Ulcerative Colitis	2/19	0.551289	0.999887	0	0	1.11957	0.666697	GCKR;NOD2
Leptin in Insulin Synthesis and Secretion	2/19	0.551289	0.999887	0	0	1.11957	0.666697	IRS2;SH2B2
Neonatal Diabetes Mellitus	2/19	0.551289	0.999887	0	0	1.11957	0.666697	ERN1;EIF2AK3
Androgen Receptor Genomic Signaling	2/19	0.551289	0.999887	0	0	1.11957	0.666697	AR;PTGS2
Intraflagellar Transport: BBSome Interaction	3/30	0.553253	0.999887	0	0	1.05734	0.625881	TTC8;RAB3IP;HDAC6
Vascular Reactivity in Raynaud Disease	3/30	0.553253	0.999887	0	0	1.05734	0.625881	ARG2;ARHGEF1;ADRA2C
BMPR2 Signaling	3/30	0.553253	0.999887	0	0	1.05734	0.625881	BMP2;XIAP;BMPR1B
WNT Canonical Signaling	3/30	0.553253	0.999887	0	0	1.05734	0.625881	CYLD;CSNK2A1;DKK1
Macrophage Dysfunction	4/41	0.555773	0.999887	0	0	1.02874	0.604275	ERN1;MAP1LC3B;LRRK2;NOD2
Proteins Involved in Thrombophilia	4/41	0.555773	0.999887	0	0	1.02874	0.604275	ACE;PROS1;F12;MTHFR
Celiac Disease	5/52	0.558461	0.999887	0	0	1.01229	0.589731	TFRC;REL;RELA;LAT;NFKB2
Peutz-Jeghers Syndrome	5/52	0.558461	0.999887	0	0	1.01229	0.589731	BCL2;CYCS;TSC1;PRKAB1;MTOR
Apoptosis Evasion in Cancer: Overview	10/106	0.559203	0.999887	0	0	0.991125	0.576084	HRK;BCL2L11;BCL2;REL;CYCS;XIAP;TNFRSF10A;BIRC6;BIRC7;BIRC3
EGFR Transactivation in Cancer and Non-Cancer Cells	6/63	0.561173	0.999887	0	0	1.00161	0.578657	ADAM17;CXCL8;MMP1;MMP15;HTR2B;ESR1
Proteins Involved in Rheumatoid Arthritis	9/96	0.569015	0.999887	0	0	0.984261	0.554975	IL32;ADAM17;CXCL8;MMP1;NAMPT;PTPN22;PPARG;PTGS2;FGF2
T-Cell Central Tolerance	4/42	0.57535	0.999887	0	0	1.00161	0.553665	CD274;BCL2L11;BCL2;LAT
Cowden Syndrome	4/42	0.57535	0.999887	0	0	1.00161	0.553665	TCF7;BCL2;CYCS;MTOR
Proteins Involved in Migraine	4/42	0.57535	0.999887	0	0	1.00161	0.553665	ACE;HTR2B;MTHFR;ESR1
Proteins Involved in Breast Cancer Related to NOTCH Signaling Pathway	3/31	0.576067	0.999887	0	0	1.01952	0.562299	JAG2;ADAM17;NOTCH4
P2RY11/13/14 -> IL8/10 Production	2/20	0.579744	0.999887	0	0	1.05731	0.576413	CXCL8;P2RY11
Golgi Transport	2/20	0.579744	0.999887	0	0	1.05731	0.576413	SEC16A;GBF1
Amyloid beta and APP Intracellular Transport in Alzheimer Disease	2/20	0.579744	0.999887	0	0	1.05731	0.576413	VPS35;LRP8
BMP2 and Canonical WNT Signaling in Pulmonary Artery Endothelial Cells	2/20	0.579744	0.999887	0	0	1.05731	0.576413	BMP2;BMPR1B
BMP2 and WNT Signaling in Pulmonary Artery Smooth Muscle Cells	2/20	0.579744	0.999887	0	0	1.05731	0.576413	BMP2;BMPR1B
ERBB/VEGFR/Akt Signaling in Breast Cancer	5/54	0.592914	0.999887	0	0	0.970867	0.507478	TCF7;BCL2;CYCS;NRG1;MTOR
Adrenoceptors Physiological Effects	1/9	0.593253	0.999887	0	0	1.18951	0.621081	ADRA2C
Vitamin D Activates Transcription	1/9	0.593253	0.999887	0	0	1.18951	0.621081	PBRM1
APP Processing in Alzheimer Disease	1/9	0.593253	0.999887	0	0	1.18951	0.621081	ADAM17
Brain Dysfunction in Phenylketonuria	1/9	0.593253	0.999887	0	0	1.18951	0.621081	TH
CAV1 Dependent Senescence of Lung Fibroblasts	1/9	0.593253	0.999887	0	0	1.18951	0.621081	ATM
Cold Stress and Adrenoceptor alpha 2C Signaling in Raynaud Disease	1/9	0.593253	0.999887	0	0	1.18951	0.621081	ADRA2C
IL10/STAT3 Signaling in M2 Macrophage and Retinal Angiogenesis	1/9	0.593253	0.999887	0	0	1.18951	0.621081	FGF2
Kruppel-like Factor 6 Signaling in Prostate Cancer	1/9	0.593253	0.999887	0	0	1.18951	0.621081	ATF3
Prostaglandin E2 Synthesis Activation via Glutamate in Familial Hemiplegic Migraine	1/9	0.593253	0.999887	0	0	1.18951	0.621081	PTGS2
Proteins Involved in Hypoparathyroidism	1/9	0.593253	0.999887	0	0	1.18951	0.621081	FAM111A
Proteins Involved in Pyelonephritis	1/9	0.593253	0.999887	0	0	1.18951	0.621081	CXCL8
Proteins Involved in Thyroid Dysgenesis	1/9	0.593253	0.999887	0	0	1.18951	0.621081	PAX8
SNCA in Young Onset Parkinson's Disease	1/9	0.593253	0.999887	0	0	1.18951	0.621081	TH
Genes with Mutations in Cancer-Associated Enabling of Replicative Immortality	1/9	0.593253	0.999887	0	0	1.18951	0.621081	REL
Proteins with Altered Expression in Cancer Metabolic Reprogramming (Krebs Cycle)	1/9	0.593253	0.999887	0	0	1.18951	0.621081	IDH1
Ritonavir Induced Diabetes	1/9	0.593253	0.999887	0	0	1.18951	0.621081	IRS2
IGF1R -> CEBPA/FOXO1A Signaling	1/9	0.593253	0.999887	0	0	1.18951	0.621081	CEBPA
IL3R -> STAT Signaling	1/9	0.593253	0.999887	0	0	1.18951	0.621081	CSF2RB
IL5R -> STAT Signaling	1/9	0.593253	0.999887	0	0	1.18951	0.621081	CSF2RB
InsulinR -> STAT Signaling	1/9	0.593253	0.999887	0	0	1.18951	0.621081	SH2B2
NOTCH -> NF-kB Signaling	1/9	0.593253	0.999887	0	0	1.18951	0.621081	ADAM17
PDGFR -> STAT Signaling	1/9	0.593253	0.999887	0	0	1.18951	0.621081	PDGFC
TGFBR3 -> ARRB2 Signaling	1/9	0.593253	0.999887	0	0	1.18951	0.621081	TGFBR3
IGF1R/AKT Signaling in Breast Cancer	4/43	0.594429	0.999887	0	0	0.975872	0.507604	TCF7;BCL2;CYCS;MTOR
WNT in Epithelial to Mesenchymal Transition in Cancer	4/43	0.594429	0.999887	0	0	0.975872	0.507604	OCLN;CSNK2A1;MMP15;CLDN1
Insulin Influence on Protein Synthesis	3/32	0.598134	0.999887	0	0	0.984311	0.505877	IRS2;TSC1;MTOR
Replication Stress Triggers Genomic Instability	3/32	0.598134	0.999887	0	0	0.984311	0.505877	CCNT1;ATM;ATR
Exocytosis: Vesicle Tethering	3/32	0.598134	0.999887	0	0	0.984311	0.505877	RALA;RAB3IP;EXOC6
Apoptosis Block in Infected Cells	3/32	0.598134	0.999887	0	0	0.984311	0.505877	BCL2;CYCS;BIRC3
DNA Damage Checkpoint Impairment in Cancer	3/32	0.598134	0.999887	0	0	0.984311	0.505877	ATM;BRCA2;ATR
EGFR/ERBB2 -> HIF1A Signaling	3/32	0.598134	0.999887	0	0	0.984311	0.505877	NRG1;TSC1;MTOR
Estrogens/ESR1 non-Genomic Signaling	3/32	0.598134	0.999887	0	0	0.984311	0.505877	BCL2;ESR1;PELP1
MTHFR Activity Regulation	2/21	0.606847	0.999887	0	0	1.00161	0.500281	SREBF1;MTHFR
BMP Signaling Impairment in Granulosa Cell in POF	2/21	0.606847	0.999887	0	0	1.00161	0.500281	PTGS2;BMPR1B
Glutamate Overdose and Aura Effect in Migraine Type 1	2/21	0.606847	0.999887	0	0	1.00161	0.500281	CACNA2D2;SYT7
IFN-gamma/TNF-alpha Mediated Cell Proliferation in Psoriasis	2/21	0.606847	0.999887	0	0	1.00161	0.500281	BCL2;KLF4
Proteins Involved in Congenital Hypothyroidism	2/21	0.606847	0.999887	0	0	1.00161	0.500281	ACE;PAX8
Sonic Hedgehog Signaling in Neuroblastoma	2/21	0.606847	0.999887	0	0	1.00161	0.500281	BCL2;MTOR
Dexamethasone Induced Diabetes	2/21	0.606847	0.999887	0	0	1.00161	0.500281	IRS2;DKK1
InsulinR -> ELK/SRF/SREBF Signaling	2/21	0.606847	0.999887	0	0	1.00161	0.500281	SREBF1;IRS2
NOTCH -> TCF3 Signaling	2/21	0.606847	0.999887	0	0	1.00161	0.500281	JAG2;ADAM17
NFKB Signaling Activation by Blocking of Tumor Suppressors	5/55	0.609568	0.999887	0	0	0.951397	0.470945	CYLD;REL;TNFRSF14;RELA;NFKB2
Norepinephrine Neuronal Release	4/44	0.612988	0.999887	0	0	0.951423	0.465636	NAPA;TH;RAB3IP;CACNA2D2
Adipokines Production by Adipocyte Impaired in Obesity	4/44	0.612988	0.999887	0	0	0.951423	0.465636	CEBPA;NAMPT;IRS2;PPARG
Arterial Hypertension	4/44	0.612988	0.999887	0	0	0.951423	0.465636	CXCL8;PROS1;PTGS2;ESR1
beta-Cell Mass Regulation	4/44	0.612988	0.999887	0	0	0.951423	0.465636	GIPR;IRS2;SH2B2;MTOR
Eosinophil Activation and Degranulation in Asthma	4/44	0.612988	0.999887	0	0	0.951423	0.465636	CEBPA;LTB4R2;LTB4R;CCL26
FOXO1 Signaling	4/44	0.612988	0.999887	0	0	0.951423	0.465636	BCL2L11;IRS2;PPARG;SH2B2
APC/C-CDC20 Complex	3/33	0.619434	0.999887	0	0	0.951448	0.455695	STAG1;ESPL1;ANAPC10
Ras Signaling	3/33	0.619434	0.999887	0	0	0.951448	0.455695	AFDN;RALA;RALGPS1
STAT3 and NFkB Activate Inflammation-Induced Tumorigenesis	6/67	0.622688	0.999887	0	0	0.935723	0.443262	BCL2;REL;PTGS2;FGF2;RELA;BIRC3
Crohn's Disease	5/56	0.625821	0.999887	0	0	0.93269	0.437144	ERN1;MAP1LC3B;LRRK2;IRAK3;NOD2
Genes with Mutations in Cancer-Associated Sustaining of Proliferative Signaling	10/112	0.630575	0.999887	0	0	0.932513	0.430004	AR;CDKN2B;REL;IRS2;TNFRSF14;ATM;BRCA2;NFKB2;ATR;BIRC3
Proteins Involved in Presbycusis	4/45	0.63101	0.999887	0	0	0.928166	0.427359	ADK;HTR2B;BCL2;XIAP
HTR2 -> Membrane Transport	1/10	0.631952	0.999887	0	0	1.05728	0.485229	HTR2B
Histone Ubiquitylation	1/10	0.631952	0.999887	0	0	1.05728	0.485229	PAF1
Bone Resorption by Osteoclasts in Osteoporosis	1/10	0.631952	0.999887	0	0	1.05728	0.485229	CLCN7
Extracellular Matrix Degradation in Skin Aging	1/10	0.631952	0.999887	0	0	1.05728	0.485229	MMP1
Genes with Mutations Associated with Endometrial Cancer	1/10	0.631952	0.999887	0	0	1.05728	0.485229	MLH1
INHA Gene Mutations in Granulosa Cell Proliferation	1/10	0.631952	0.999887	0	0	1.05728	0.485229	ACVR2B
Nitroxyl and CGRP in Migraine Pain Activation	1/10	0.631952	0.999887	0	0	1.05728	0.485229	CTH
Proteins with Altered Expression in Celiac Disease	1/10	0.631952	0.999887	0	0	1.05728	0.485229	OCLN
SHBG and IGFBP1 Synthesis Decline in Polycystic Ovary Syndrome	1/10	0.631952	0.999887	0	0	1.05728	0.485229	IRS2
WNT Inhibition by DKK1 in Osteoblast in Multiple Myelome	1/10	0.631952	0.999887	0	0	1.05728	0.485229	DKK1
EctodysplasinR -> LEF1 Signaling	1/10	0.631952	0.999887	0	0	1.05728	0.485229	EDA2R
EGFR -> ZNF259 Signaling	1/10	0.631952	0.999887	0	0	1.05728	0.485229	NRG1
FcIgER -> NFATC1 Signaling	1/10	0.631952	0.999887	0	0	1.05728	0.485229	LAT
G1/S Damage Checkpoint	2/22	0.6326	0.999887	0	0	0.951474	0.435696	ATM;ATR
AGE Related Insulin Resistance in Skeletal Muscles	2/22	0.6326	0.999887	0	0	0.951474	0.435696	XIAP;BIRC3
Apoptosis of Chondrocyte	2/22	0.6326	0.999887	0	0	0.951474	0.435696	BCL2;CYCS
Proteins with Altered Expression in Rheumatoid Arthritis	2/22	0.6326	0.999887	0	0	0.951474	0.435696	CXCL8;FGF2
TP53 Signaling in Pancreatic Neoplasms	2/22	0.6326	0.999887	0	0	0.951474	0.435696	CYCS;ATM
Cyclosporine Induced Nephrotoxicity	2/22	0.6326	0.999887	0	0	0.951474	0.435696	ACE;PTGS2
Insulin Synthesis in beta-Cell	3/34	0.639952	0.999887	0	0	0.920705	0.410968	ERN1;PCSK1N;EIF2AK3
mTOR Signaling Activation by Taste Sensor Receptors (Rodent Model)	3/34	0.639952	0.999887	0	0	0.920705	0.410968	ACE;AKT1S1;MTOR
Vascular Endothelial Cell Activation by Blood Coagulation Factors	5/57	0.641659	0.999887	0	0	0.914703	0.405853	OCLN;CXCL8;PROS1;CXCL2;F2RL3
TGFB Family in Epithelial to Mesenchymal Transition in Cancer	7/80	0.647685	0.999887	0	0	0.912097	0.39617	BMP2;OCLN;PARD6A;MMP15;BMPR1B;CLDN1;MTOR
Adipokines Production by Adipocyte	4/46	0.648483	0.999887	0	0	0.906016	0.392413	CEBPA;NAMPT;IRS2;PPARG
Natural Killer Cell Activation through Integrins and non-ITAM-Containing Receptors	4/46	0.648483	0.999887	0	0	0.906016	0.392413	CLEC2B;ICAM2;ICAM3;LAT
Coagulation Cascade	2/23	0.657013	0.999887	0	0	0.906115	0.380615	F12;PROS1
Eicosanoids in Myeloid Cell Activation	2/23	0.657013	0.999887	0	0	0.906115	0.380615	LTB4R2;LTB4R
Neutrophil Activation via LTB4/Polyisoprenyl Phosphate Signaling	2/23	0.657013	0.999887	0	0	0.906115	0.380615	LTB4R;LAT
Hereditary Thrombophilia and Pregnancy Complications	2/23	0.657013	0.999887	0	0	0.906115	0.380615	F12;PROS1
Thrombophilia Hereditary	2/23	0.657013	0.999887	0	0	0.906115	0.380615	F12;PROS1
Myoblast -> Neutrophil Surface Expression Markers	5/58	0.657072	0.999887	0	0	0.897395	0.376872	CD274;TFRC;C5AR1;ICAM3;CD55
IL22 Induces Keratinocyte Proliferation in Psoriasis	3/35	0.659679	0.999887	0	0	0.891884	0.371026	CEBPA;MMP1;MTOR
TLR2 Induced Synovial Fibroblast Activation in Rheumatoid Arthritis	3/35	0.659679	0.999887	0	0	0.891884	0.371026	CXCL8;MMP1;CXCL2
Proteins Involved in Age-Related Macular Degeneration	13/148	0.659795	0.999887	0	0	0.915707	0.380775	CXCL8;MMP1;C5AR1;HMGCR;BEST1;P2RX7;PRPH2;ADORA2B;HMOX1;COL10A1;OLR1;ANG;CD55
Proteins Involved in Insulin Resistance	7/81	0.660696	0.999887	0	0	0.899722	0.372901	SREBF1;SCD;IRS2;PPARG;PPARA;LPIN1;MTOR
IL1B Expression Targets -> Nociception	4/47	0.665397	0.999887	0	0	0.884897	0.360481	CXCL8;PTGS2;FGF2;PTHLH
Low-Grade Serous Ovarian Carcinoma	6/70	0.665409	0.999887	0	0	0.891713	0.363242	JAG2;BCL2;CYCS;NRG1;ESR1;MTOR
Medulloblastoma	9/104	0.666209	0.999887	0	0	0.900976	0.365934	ADAM17;BMP2;MNT;TCF7;BCL2;KCTD11;NRG1;BMPR1B;E2F5
Activin, Inhibin and Follistatin Action on Pituitary Gland	1/11	0.666971	0.999887	0	0	0.951499	0.385365	ACVR2B
Agomelatine Antidepressant Action	1/11	0.666971	0.999887	0	0	0.951499	0.385365	HTR2B
Mast-Cell Activation without Degranulation through CXCR4 Signaling	1/11	0.666971	0.999887	0	0	0.951499	0.385365	CXCL8
Prostaglandin E2 Receptor Signaling in Neurons	1/11	0.666971	0.999887	0	0	0.951499	0.385365	PTGS2
Synaptic Potentiation by PKMZ in LTP Maintenance - Basal State	1/11	0.666971	0.999887	0	0	0.951499	0.385365	PICK1
INO80 in Chromatin Remodeling	1/11	0.666971	0.999887	0	0	0.951499	0.385365	INO80D
Alstrom Syndrome Progression (Hypothesis)	1/11	0.666971	0.999887	0	0	0.951499	0.385365	ALMS1
Argininosuccinic Aciduria in Urea Cycle Disorders	1/11	0.666971	0.999887	0	0	0.951499	0.385365	ASS1
Citrullinemia Type I	1/11	0.666971	0.999887	0	0	0.951499	0.385365	ASS1
Citrullinemia Type II	1/11	0.666971	0.999887	0	0	0.951499	0.385365	ASS1
Dopamine Action in CSD Progression	1/11	0.666971	0.999887	0	0	0.951499	0.385365	PTGS2
Endosomal Trafficking Dysregulation in Amyotrophic Lateral Sclerosis	1/11	0.666971	0.999887	0	0	0.951499	0.385365	SQSTM1
Glioblastoma, Proneural Subtype	1/11	0.666971	0.999887	0	0	0.951499	0.385365	IDH1
Hedgehog Signaling in Mantle Cell Lymphoma	1/11	0.666971	0.999887	0	0	0.951499	0.385365	BCL2
Hyperammonemia Type I	1/11	0.666971	0.999887	0	0	0.951499	0.385365	ASS1
Hyperammonemia Type II	1/11	0.666971	0.999887	0	0	0.951499	0.385365	ASS1
Proteins Involved in Ependymoma	1/11	0.666971	0.999887	0	0	0.951499	0.385365	CXCL8
Proteins Involved in Usher Syndromes	1/11	0.666971	0.999887	0	0	0.951499	0.385365	PDZD7
Proteins Mutated in Photoreceptor and Retinal Pigment Epithelial Cell	1/11	0.666971	0.999887	0	0	0.951499	0.385365	PDE4DIP
Proteins with Altered Expression in Atopic Dermatitis	1/11	0.666971	0.999887	0	0	0.951499	0.385365	TSLP
TGF-beta Signaling in Skin Aging	1/11	0.666971	0.999887	0	0	0.951499	0.385365	MMP1
Genes with Mutations in Cancer Immune Escape	1/11	0.666971	0.999887	0	0	0.951499	0.385365	CD274
Kynurenine Metabolites in Neurotoxicity and Neuroprotection	1/11	0.666971	0.999887	0	0	0.951499	0.385365	QPRT
Aryl Hydrocarbon Receptor/Tryptophan Metabolites Signaling	1/11	0.666971	0.999887	0	0	0.951499	0.385365	CYP1B1
CD2 -> NFATC1 Signaling	1/11	0.666971	0.999887	0	0	0.951499	0.385365	LAT
Proteins Involved in Spontaneous Abortion	8/93	0.6693	0.999887	0	0	0.895111	0.359407	AR;ACE;LIF;HLA-DPB1;HMOX1;MTHFR;PTGS2;CCL28
Proteins Involved in Psoriatic Arthritis	5/59	0.672051	0.999887	0	0	0.880728	0.350019	SYVN1;PPARG;NOD2;FGF2;CARD14
Proteins Involved in Retinitis Pigmentosa	11/127	0.672368	0.999887	0	0	0.90174	0.357945	ARF4;FAM161A;PRPH2;CDHR1;XIAP;FGF2;DGKI;BEST1;DHDDS;PRPH;SLC19A2
High-Grade Serous Ovarian Carcinoma	7/82	0.67341	0.999887	0	0	0.887676	0.350988	JAG2;BCL2;CYCS;NRG1;BRCA2;ESR1;MTOR
Necrosis	3/36	0.678611	0.999887	0	0	0.864809	0.335293	CYLD;BCL2;NSMAF
Norepinephrine Release Regulation	3/36	0.678611	0.999887	0	0	0.864809	0.335293	NAPA;TH;CACNA2D2
Intraflagellar Transport: Retrograde Transport	3/36	0.678611	0.999887	0	0	0.864809	0.335293	DYNC2H1;TTC8;IFT172
Tumor Infiltrating Macrophages in Cancer Progression and Immune Escape	3/36	0.678611	0.999887	0	0	0.864809	0.335293	CD274;CXCL8;FGF2
Lysophosphatidic Acid/LPARs Signaling	3/36	0.678611	0.999887	0	0	0.864809	0.335293	PPARG;MTOR;RAPGEF3
Lipoxins and Resolvins in Inflammation Resolution	2/24	0.680108	0.999887	0	0	0.86488	0.333414	PTGS2;LTB4R
Synaptic Potentiation by PKMZ in LTP Maintenance - Active State	2/24	0.680108	0.999887	0	0	0.86488	0.333414	PICK1;MTOR
ALK Associated Neuroblastoma	2/24	0.680108	0.999887	0	0	0.86488	0.333414	BCL2;MTOR
Antiphospholipid Antibodies in Platelets and Coagulation Cascade	2/24	0.680108	0.999887	0	0	0.86488	0.333414	PROS1;LRP8
G-Proteins Signaling in Insulin Secretion in beta-Cell	2/24	0.680108	0.999887	0	0	0.86488	0.333414	GIPR;HTR2B
Platelet and Coagulation Cascade Activation by Antiphospholipid Antibodies	2/24	0.680108	0.999887	0	0	0.86488	0.333414	PROS1;LRP8
Proteins Involved in Hypoxia-Induced Pulmonary Hypertension	2/24	0.680108	0.999887	0	0	0.86488	0.333414	HTR2B;HMOX1
Mutations in Krebs Cycle Enzymes in Cancer	2/24	0.680108	0.999887	0	0	0.86488	0.333414	IDH1;MTOR
T-Cell Receptor -> CREBBP Signaling	2/24	0.680108	0.999887	0	0	0.86488	0.333414	CAMKK1;LAT
TLR -> AP-1 Signaling	2/24	0.680108	0.999887	0	0	0.86488	0.333414	LY96;TLR6
Diffuse Large-B-Cell Lymphoma ABC Subtype	4/48	0.681746	0.999887	0	0	0.864738	0.331279	CDKN2B;BCL2;MTOR;ATR
Gluten Impact on Neuronal System (Hypothesis)	4/48	0.681746	0.999887	0	0	0.864738	0.331279	REL;RELA;LAT;NFKB2
Proteins with Altered Expression in Cancer Immune Escape	4/48	0.681746	0.999887	0	0	0.864738	0.331279	CD274;ADAM17;SLC7A11;CD55
Pancreatic Ductal Carcinoma	10/117	0.685074	0.999887	0	0	0.88869	0.336128	JAG2;ADAM17;BCL2;CYCS;ATM;NRG1;BRCA2;MLH1;MYSM1;MTOR
Mucinous Ovarian Carcinoma	5/60	0.686592	0.999887	0	0	0.864667	0.325128	BCL2;CYCS;NRG1;ESR1;MTOR
Proliferative Diabetic Retinopathy	5/60	0.686592	0.999887	0	0	0.864667	0.325128	GFPT1;PGM3;HMOX1;UAP1;PTGS2
Glioma Stem Cell Program Activation	6/72	0.692131	0.999887	0	0	0.864595	0.318154	ADAM17;BMP2;TCF7;KLF4;BMPR1B;DKK1
Intraflagellar Transport: Anterograde Transport	3/37	0.69675	0.999887	0	0	0.839327	0.303273	DYNC2H1;TTC8;IFT172
mTOR/NF-kB/BCR Signaling Disregulation in Mantle Cell Lymphoma	4/49	0.697526	0.999887	0	0	0.845475	0.304553	BCL2L11;BCL2;XIAP;MTOR
Gastric and Pancreatic Lipase Function	1/12	0.698659	0.999887	0	0	0.864951	0.310165	PPARG
Kynurenine Metabolites in T-Cell Apoptosis	1/12	0.698659	0.999887	0	0	0.864951	0.310165	QPRT
Mast-Cell Activation without Degranulation through CYSLTR1/CYSLTR2 Signaling	1/12	0.698659	0.999887	0	0	0.864951	0.310165	CXCL8
PRL Expression Regulation by BMP4 and TGFB1	1/12	0.698659	0.999887	0	0	0.864951	0.310165	ESR1
TACR1 -> TNF/IL6/IL8 Production	1/12	0.698659	0.999887	0	0	0.864951	0.310165	CXCL8
V(D)J Recombination	1/12	0.698659	0.999887	0	0	0.864951	0.310165	DNTTIP1
Androgen Receptor/NKX3-1 Signaling	1/12	0.698659	0.999887	0	0	0.864951	0.310165	AR
Androgen Receptor/Prostate Specific Antigen Signaling in Prostate Cancer	1/12	0.698659	0.999887	0	0	0.864951	0.310165	AR
beta-Cell Death in Diabetes Mellitus Type 2	1/12	0.698659	0.999887	0	0	0.864951	0.310165	CYCS
Desmosome Dysfunction in Cardiomyocyte	1/12	0.698659	0.999887	0	0	0.864951	0.310165	PKP4
FSH Hyperproduction Due to INHA Mutation in Primary Ovarian Insufficiency	1/12	0.698659	0.999887	0	0	0.864951	0.310165	ACVR2B
MPB-Related Complement Cascade Activation	1/12	0.698659	0.999887	0	0	0.864951	0.310165	C5AR1
nNOS (NOS1) and iNOS (NOS2) Activation via Glutamate	1/12	0.698659	0.999887	0	0	0.864951	0.310165	RASD1
Uric Acid Excretion Impairement in Kidney in Gout	1/12	0.698659	0.999887	0	0	0.864951	0.310165	ABCC4
Kynurenine Metabolites Supress T-Cells in Cancer Immune Escape	1/12	0.698659	0.999887	0	0	0.864951	0.310165	QPRT
EctodysplasinR -> NF-kB Signaling	1/12	0.698659	0.999887	0	0	0.864951	0.310165	EDA2R
EGFR -> CTNND Signaling	1/12	0.698659	0.999887	0	0	0.864951	0.310165	NRG1
InsulinR -> CTNNB/FOXA/FOXO Signaling	1/12	0.698659	0.999887	0	0	0.864951	0.310165	IRS2
Eat me Signal: Apoptotic Cell Initiates Phagocytosis	2/25	0.701915	0.999887	0	0	0.827231	0.292792	PROS1;ICAM3
Blood-Brain Barrier Disruption in Epileptiform Disorders	2/25	0.701915	0.999887	0	0	0.827231	0.292792	TSC1;MTOR
Local Estrogen Production in Endometriosis	2/25	0.701915	0.999887	0	0	0.827231	0.292792	PTGS2;ESR1
Myeloid Cell Differentiation Block in Leukemia	2/25	0.701915	0.999887	0	0	0.827231	0.292792	CEBPA;CBFA2T3
MTOR/TORC in Cancer Cell Motility and Invasion	2/25	0.701915	0.999887	0	0	0.827231	0.292792	TSC1;MTOR
Single Strand Nucleotide Excision DNA Repair Suppression in Cancer	2/25	0.701915	0.999887	0	0	0.827231	0.292792	LIG1;ERCC5
Proteins with Altered Expression in Cancer-Associated Sustaining of Proliferative Signaling	15/175	0.701972	0.999887	0	0	0.891196	0.31536	JAG2;CDKN2B;IRS2;NRG1;GAB2;BRCA2;FGF2;ESR1;NFKB2;AR;PDGFC;REL;TNFRSF14;ATM;ATR
Proteins Involved in Hodgkin Lymphoma	4/50	0.712736	0.999887	0	0	0.827049	0.280075	BCL2;HLA-DPB1;XIAP;PTGS2
Proteins Involved in Vitiligo	4/50	0.712736	0.999887	0	0	0.827049	0.280075	GDF15;IL20RB;DKK1;ESR1
Proteins Involved in Diabetes Mellitus Type 1	8/97	0.714751	0.999887	0	0	0.854692	0.287023	CD274;CYP27B1;ACE;HLA-DPB1;HMOX1;PTPN22;PPARG;PTGS2
mRNA Degradation	2/26	0.72247	0.999887	0	0	0.792719	0.257696	SKIV2L;EDC3
SCF/SKP2 Complex	2/26	0.72247	0.999887	0	0	0.792719	0.257696	RAD50;BCL2L11
Cell Cycle Dysregulation in Mantle Cell Lymphoma	2/26	0.72247	0.999887	0	0	0.792719	0.257696	ATM;ATR
Glutamate Overdose and Aura Effect Caused by Mutations in PRRT2 Gene	2/26	0.72247	0.999887	0	0	0.792719	0.257696	CACNA2D2;SYT7
IL23A and IL17A Provoke Cancer-Associated Inflammation	2/26	0.72247	0.999887	0	0	0.792719	0.257696	REL;PTGS2
ROS and RNS in Vasoconstriction and Vasodilation Regulation	2/26	0.72247	0.999887	0	0	0.792719	0.257696	ACE;PTGS2
Hedgehog Family Signaling	2/26	0.72247	0.999887	0	0	0.792719	0.257696	KCTD11;CDON
Complement Classical Pathway	1/13	0.727334	0.999887	0	0	0.792828	0.252412	C5AR1
Dopamine Mediated Glutamate Release/Uptake Circle in Neuron in Migraine	1/13	0.727334	0.999887	0	0	0.792828	0.252412	STX3
Estrogens Procoagulant Effect	1/13	0.727334	0.999887	0	0	0.792828	0.252412	PROS1
Mast-Cell Activation without Degranulation through TNFSF8 Signaling	1/13	0.727334	0.999887	0	0	0.792828	0.252412	CXCL8
LINE1 Retrotransposition in Neuron Development (Hypothesis)	1/13	0.727334	0.999887	0	0	0.792828	0.252412	ATM
Advanced Glycation End Products in Diabetes or Age Related Erectile Dysfunction	1/13	0.727334	0.999887	0	0	0.792828	0.252412	ARG2
Argininemia	1/13	0.727334	0.999887	0	0	0.792828	0.252412	ASS1
Dopamine Metabolism in Parkinson's Disease	1/13	0.727334	0.999887	0	0	0.792828	0.252412	TH
Genes with Mutations Associated with Melanoma	1/13	0.727334	0.999887	0	0	0.792828	0.252412	CDKN2B
HMGB1/RAGE Signaling in Middle Ear Cholesteatoma	1/13	0.727334	0.999887	0	0	0.792828	0.252412	CXCL8
Phelan-McDermid Syndrome	1/13	0.727334	0.999887	0	0	0.792828	0.252412	GKAP1
Proteins Involved in Myasthenia Gravis	1/13	0.727334	0.999887	0	0	0.792828	0.252412	CD55
Proteins with Altered Expression in Chronic Obstructive Pulmonary Disease	1/13	0.727334	0.999887	0	0	0.792828	0.252412	TLR6
Proteins with Altered Expression in Gout	1/13	0.727334	0.999887	0	0	0.792828	0.252412	CXCL8
Trabecular Meshwork and Schlemm's Canal Endothelial Cell Volume and Contractility	1/13	0.727334	0.999887	0	0	0.792828	0.252412	ARHGEF1
Genes with Mutations in Cancer-Associated Histone Deacetylation	1/13	0.727334	0.999887	0	0	0.792828	0.252412	HDAC4
EGFR/ERBB2 -> CTNNB Signaling	1/13	0.727334	0.999887	0	0	0.792828	0.252412	NRG1
FGFR1 -> STAT Signaling	1/13	0.727334	0.999887	0	0	0.792828	0.252412	FGF2
OR1A1 -> GNAS Signaling	1/13	0.727334	0.999887	0	0	0.792828	0.252412	PPARG
TLR1/2/6 -> NF-kB Signaling	1/13	0.727334	0.999887	0	0	0.792828	0.252412	TLR6
TLR4 -> IRF Signaling	1/13	0.727334	0.999887	0	0	0.792828	0.252412	LY96
TLR4/5/7/9 -> NF-kB Signaling	1/13	0.727334	0.999887	0	0	0.792828	0.252412	LY96
ESR1 Signaling in Breast Cancer	4/51	0.727377	0.999887	0	0	0.809407	0.257642	BCL2;CYCS;ESR1;MTOR
Synovial Fibroblast Activation by Citokines in Rheumatoid Arthritis	4/51	0.727377	0.999887	0	0	0.809407	0.257642	CXCL8;FZD5;MMP1;LIF
CD8+ T-Cell Response in Celiac Disease	5/63	0.727544	0.999887	0	0	0.819806	0.260764	ICAM2;REL;RELA;LAT;NFKB2
Bradykinin Effects in Inflammation	3/39	0.730675	0.999887	0	0	0.79261	0.24871	ACE;MMP1;F12
Apoptosis Block in Melanoma Cell	3/39	0.730675	0.999887	0	0	0.79261	0.24871	BCL2L11;BCL2;BIRC7
Inhibition of THBS1 Activates Angiogenesis in Cancer	3/39	0.730675	0.999887	0	0	0.79261	0.24871	CYCS;TNFRSF10A;FGF2
Prolactin Production	4/52	0.741454	0.999887	0	0	0.792501	0.237071	LIF;NRG1;FGF2;ESR1
Myeloid Derived Suppressor Cells in Cancer Immune Escape	4/52	0.741454	0.999887	0	0	0.792501	0.237071	ADAM17;BCL2;CSF2RB;SLC7A11
NF-kB Canonical Signaling	4/52	0.741454	0.999887	0	0	0.792501	0.237071	CYLD;REL;RELA;NFKB2
CCR1 Expression Targets	2/27	0.741814	0.999887	0	0	0.760968	0.227268	MMP1;PTGS2
IL6 Expression Targets -> Nociception	2/27	0.741814	0.999887	0	0	0.760968	0.227268	CXCL8;PTGS2
Adherens Junction Assembly (Nectin)	2/27	0.741814	0.999887	0	0	0.760968	0.227268	AFDN;SSX2IP
Ca2+ Toxicity in Neurons	2/27	0.741814	0.999887	0	0	0.760968	0.227268	CYCS;LRP8
Glutamate Overdose and Aura Effect Caused by Mutations in SLC1A3 Gene	2/27	0.741814	0.999887	0	0	0.760968	0.227268	CACNA2D2;SYT7
Glutamate Overdose and Aura Effect Overiew	2/27	0.741814	0.999887	0	0	0.760968	0.227268	CACNA2D2;SYT7
Oxidation of Fatty Acid in non-Alcoholic Fatty Liver Disease	2/27	0.741814	0.999887	0	0	0.760968	0.227268	ACSL1;PPARA
Proteins with Altered Expression in Psoriasis	2/27	0.741814	0.999887	0	0	0.760968	0.227268	MMP1;KLF4
Kinetochore Assembly	3/40	0.746482	0.999887	0	0	0.771146	0.22547	ZW10;CENPN;MXD1
TNFR -> CREB/ELK-SRF Signaling	3/40	0.746482	0.999887	0	0	0.771146	0.22547	RPS6KA5;TNFRSF14;TNFRSF10A
Clear Cell Endometrial Cancer and Papillary Serous Endometrial Cancer	5/65	0.752615	0.999887	0	0	0.792391	0.225198	CLDN3;BCL2;CYCS;NRG1;MTOR
Proteins Involved in Hypertrophic Cardiomyopathy	5/65	0.752615	0.999887	0	0	0.792391	0.225198	ACE;FOSB;FGF2;MYOZ2;MTOR
Complement Activation by Lectin	1/14	0.753281	0.999887	0	0	0.731801	0.207331	C5AR1
Complement Alternative Pathway	1/14	0.753281	0.999887	0	0	0.731801	0.207331	C5AR1
Hormones Underlie Human Gastrointestinal Functions and Eating Behavior	1/14	0.753281	0.999887	0	0	0.731801	0.207331	NUCB2
Melatonin in Cell Survival and Antioxidant Response	1/14	0.753281	0.999887	0	0	0.731801	0.207331	BCL2
PRL and CSH Action in Mammary Gland	1/14	0.753281	0.999887	0	0	0.731801	0.207331	FASN
Genes with Mutations Associated with Bardet-Biedl Syndrome and Retinitis Pigmentosa	1/14	0.753281	0.999887	0	0	0.731801	0.207331	TTC8
Genes with Mutations Associated with Psoriatic Arthritis	1/14	0.753281	0.999887	0	0	0.731801	0.207331	REL
Glutamate, D-Serine, and ATP Release from Astrocytes	1/14	0.753281	0.999887	0	0	0.731801	0.207331	SYT7
Neurotoxin Effects in Parkinson's Disease	1/14	0.753281	0.999887	0	0	0.731801	0.207331	CYCS
Oxidative Stress in Vitiligo	1/14	0.753281	0.999887	0	0	0.731801	0.207331	CXCL8
PAX8 Targets in Thyroid Dysgenesis (Hypothesis)	1/14	0.753281	0.999887	0	0	0.731801	0.207331	PAX8
Proteins Involved in Urolithiasis	1/14	0.753281	0.999887	0	0	0.731801	0.207331	NEU1
Proteins with Altered Expression in Psoriatic Arthritis	1/14	0.753281	0.999887	0	0	0.731801	0.207331	CXCL8
EphrinR -> Actin Signaling	1/14	0.753281	0.999887	0	0	0.731801	0.207331	EFNA3
FGFR3 -> STAT Signaling	1/14	0.753281	0.999887	0	0	0.731801	0.207331	FGF2
TNFRSF6 -> DDIT3 Signaling	1/14	0.753281	0.999887	0	0	0.731801	0.207331	DDIT3
HPV E5 Regulates EDNRA and EGFR Signaling Pathway in Keratinocytes	4/53	0.754971	0.999887	0	0	0.776284	0.218195	RPS6KA5;BCL2;PTGS2;MTOR
GABA(B)R -> Postsynaptic Inhibition	2/28	0.759991	0.999887	0	0	0.73166	0.200803	KCNJ14;CAMKK1
Postsynaptic Neuron Activation	2/28	0.759991	0.999887	0	0	0.73166	0.200803	RASD1;PTGS2
Proteins with Altered Expression in Breast Cancer	2/28	0.759991	0.999887	0	0	0.73166	0.200803	TNFRSF10A;ESR1
Proteins with Altered Expression in Ovarian Cancer	2/28	0.759991	0.999887	0	0	0.73166	0.200803	ESR1;MTOR
DREAM Complex and FOXM1/MYBL2 Promote Cell Cycle Progression in Cancer	2/28	0.759991	0.999887	0	0	0.73166	0.200803	ESR1;LIN52
EZH2 Methyltransferase Role in Cancer	2/28	0.759991	0.999887	0	0	0.73166	0.200803	AR;RELA
Androgen Receptor non-Genomic Signaling	2/28	0.759991	0.999887	0	0	0.73166	0.200803	AR;MTOR
IL17 Signaling in Psoriasis	3/41	0.761538	0.999887	0	0	0.750811	0.204532	CXCL8;MMP1;CXCL2
Insulin Resistance in Myocytes Induced by Obesity	3/41	0.761538	0.999887	0	0	0.750811	0.204532	SREBF1;FABP3;ACSL1
Proteins with Altered Expression in Endometriosis	3/41	0.761538	0.999887	0	0	0.750811	0.204532	CRABP2;MMP1;PTGS2
Epithelial to Mesenchymal Transition in Cancer: Overview	7/90	0.764021	0.999887	0	0	0.801761	0.215802	JAG2;OCLN;HEY1;MMP15;NOTCH4;CLDN1;FGF2
Proteins Involved in Prostate Cancer	11/138	0.772708	0.999887	0	0	0.823132	0.212248	AR;CEBPA;CDKN2B;GDF15;BCL2;ETV1;PPARG;BRCA2;PTGS2;PTHLH;MTOR
Skeletal Muscle Wasting in Cancer Cachexia	3/42	0.77586	0.999887	0	0	0.731519	0.185647	MAP1LC3B;ACVR2B;MTOR
ADORA1/2A -> Exocytosis	1/15	0.776761	0.999887	0	0	0.679492	0.171655	SYT7
Immunoglobulin Genes Transcriptional Activation	1/15	0.776761	0.999887	0	0	0.679492	0.171655	ADAM17
Vitamin D Represses Transcription	1/15	0.776761	0.999887	0	0	0.679492	0.171655	CYP27B1
Chromosome Condensation	1/15	0.776761	0.999887	0	0	0.679492	0.171655	ESPL1
DNA Replication in DNA Machinery	1/15	0.776761	0.999887	0	0	0.679492	0.171655	FEN1
ADAM33 Role in Asthma	1/15	0.776761	0.999887	0	0	0.679492	0.171655	TIMP4
Adipose Tissue Inflammation Provokes Insulin Resistance	1/15	0.776761	0.999887	0	0	0.679492	0.171655	LIPE
Desmosomes Role in Dilated Cardiomyopathy	1/15	0.776761	0.999887	0	0	0.679492	0.171655	PKP4
NF-kB Signaling Activation in Huntington Disease	1/15	0.776761	0.999887	0	0	0.679492	0.171655	CXCL8
Proteins with Altered Expression in Osteoarthritis	1/15	0.776761	0.999887	0	0	0.679492	0.171655	COL10A1
PTPRN/STAT5 in Insulin Synthesis in beta-Cell (Rodent Model)	1/15	0.776761	0.999887	0	0	0.679492	0.171655	SH2B2
TLR3 Role in Retinal Pigment Epithelial Cell	1/15	0.776761	0.999887	0	0	0.679492	0.171655	CYCS
TRPM8 Effects in Prostate Cancer (Hypothesis)	1/15	0.776761	0.999887	0	0	0.679492	0.171655	AR
WNT Signaling Dysregulation in Osteoblast	1/15	0.776761	0.999887	0	0	0.679492	0.171655	OSTM1
Acetaminophen Induced Hepatotoxicity	1/15	0.776761	0.999887	0	0	0.679492	0.171655	CYCS
CD46/CD55/CD59 Inhibit Complement Mediated Lysis of Cancer Cells	1/15	0.776761	0.999887	0	0	0.679492	0.171655	CD55
Proteins with Altered Expression in Cancer-Associated Histone Deacetylation	1/15	0.776761	0.999887	0	0	0.679492	0.171655	HDAC6
Complement Component GPCRs Signaling	1/15	0.776761	0.999887	0	0	0.679492	0.171655	C5AR1
EphrinR -> STAT Signaling	1/15	0.776761	0.999887	0	0	0.679492	0.171655	EFNA3
Complement Activation in Macular Degeneration	2/29	0.777048	0.999887	0	0	0.704522	0.177718	C5AR1;CD55
IL6 Promotes Inflammation in Muscular Dystrophies	2/29	0.777048	0.999887	0	0	0.704522	0.177718	ADAM17;MTOR
Macrophage Function in Diabetes Mellitus Type 1	2/29	0.777048	0.999887	0	0	0.704522	0.177718	ICAM2;LAT
Mevalonate Kinase Deficiency	2/29	0.777048	0.999887	0	0	0.704522	0.177718	P2RX7;PMVK
Vascular Endothelial Cell Vasodilation in Brain	2/29	0.777048	0.999887	0	0	0.704522	0.177718	ACE;MME
Vascular Smooth Muscle Cell Vasodilation in Brain	2/29	0.777048	0.999887	0	0	0.704522	0.177718	ACE;MME
TNFR -> NF-kB Signaling	2/29	0.777048	0.999887	0	0	0.704522	0.177718	TNFRSF14;TNFRSF10A
Apoptosis and Immediate Early Gene Activation in Epileptiform Disorders	4/55	0.780356	0.999887	0	0	0.745759	0.184952	BCL2L11;HTR2B;BCL2;CYCS
Endometrioid Endometrial Cancer	7/92	0.783545	0.999887	0	0	0.782809	0.190948	BCL2;CYCS;NRG1;MLH1;FGF2;ESR1;MTOR
Proteins Involved in Medulloblastoma	5/68	0.786927	0.999887	0	0	0.754533	0.180801	PDGFC;BCL2;KCTD11;BRCA2;FGF2
Ependymoma	3/43	0.789467	0.999887	0	0	0.713191	0.168596	JAG2;EFNA3;NRG1
Proteins Involved in Glioma	24/290	0.79222	0.999887	0	0	0.85671	0.199542	DUSP4;CXCL8;TFRC;HSPA5;MMP1;IDH1;LIF;NRG1;SLC7A11;PTGS2;DKK1;FGF2;MTOR;BCAN;CYP27B1;PANX2;BMP2;PAX8;CDK20;BCL2;SPRY2;ATM;PPARG;ANG
Neutrophil Chemotaxis	4/56	0.792243	0.999887	0	0	0.731377	0.170328	CXCL8;C5AR1;CXCL2;LTB4R
Hyaluronic Acid, CD44 and HMMR in Cancer Cell Invasion and Survival	4/56	0.792243	0.999887	0	0	0.731377	0.170328	ADAM17;BCL2;XIAP;BIRC3
High Fat Diet Activates cAMP Related Exocytosis in Synapse and Endocrine Cell	2/30	0.793033	0.999887	0	0	0.679323	0.157528	UNC13A;RAPGEF3
Vitamin A (Retinol) Metabolism and Visual Cycle	2/30	0.793033	0.999887	0	0	0.679323	0.157528	RDH11;CYP1B1
Adherens Junction Assembly (Cadherins)	2/30	0.793033	0.999887	0	0	0.679323	0.157528	AFDN;EPB41
Clear Cell Ovarian Carcinoma	6/81	0.794273	0.999887	0	0	0.760464	0.175156	PDGFC;BCL2;CYCS;ATM;ESR1;MTOR
CRH -> Synthesis of Corticosteroids	1/16	0.798006	0.999887	0	0	0.634157	0.14309	CAMKK1
Visual Cycle in Retinal Rods	1/16	0.798006	0.999887	0	0	0.634157	0.14309	RDH11
Exocytosis: Vesicle Fusion	1/16	0.798006	0.999887	0	0	0.634157	0.14309	NAPA
SWI/SNF BRG1/PBAF in Chromatin Remodeling	1/16	0.798006	0.999887	0	0	0.634157	0.14309	PBRM1
Disorders of Phenylalanine and Tyrosine Metabolism	1/16	0.798006	0.999887	0	0	0.634157	0.14309	TH
Extraocular Muscles Weakness in Myasthenia Gravis	1/16	0.798006	0.999887	0	0	0.634157	0.14309	CD55
Fatty Acids in Hypertension and Atherosclerosis Development	1/16	0.798006	0.999887	0	0	0.634157	0.14309	IRS2
Neurofibrillary Tangle Formation	1/16	0.798006	0.999887	0	0	0.634157	0.14309	TNFRSF10A
NKX2-1 in Thyroid Dysgenesis (Hypothesis)	1/16	0.798006	0.999887	0	0	0.634157	0.14309	PAX8
Proteins Involved in Androgenetic Alopecia	1/16	0.798006	0.999887	0	0	0.634157	0.14309	AR
RNA and DNA Metabolism Dysregulation	1/16	0.798006	0.999887	0	0	0.634157	0.14309	ANG
Rod Visual Cycle Impairment in Retinitis pigmentosa	1/16	0.798006	0.999887	0	0	0.634157	0.14309	RDH11
MacrophageR -> CEBPB -> NF-kB Signaling	1/16	0.798006	0.999887	0	0	0.634157	0.14309	ICAM2
Proteins Involved in Atherosclerosis	16/200	0.800786	0.999887	0	0	0.825949	0.183494	IL32;ARG2;CXCL8;PTPN22;APOA4;PTGS2;FGF2;LTB4R;ACAT1;LIPE;SERP1;SCD;NAMPT;OLR1;PPARG;ATF3
Endometrial Cancer	8/106	0.801117	0.999887	0	0	0.775812	0.172035	CLDN3;BCL2;CYCS;NRG1;MLH1;FGF2;ESR1;MTOR
Proteins with Altered Expression in Cancer Metastases	8/106	0.801117	0.999887	0	0	0.775812	0.172035	OCLN;BCL2L11;MMP1;MMP15;BCL2;XIAP;CLDN1;FGF2
Proteins Involved in Cataract	7/94	0.801838	0.999887	0	0	0.764729	0.168889	COL4A4;COL4A3;FOSB;ANK2;FGF2;SLC5A3;FTL
Proteins Involved in Pancreatic Cancer	7/94	0.801838	0.999887	0	0	0.764729	0.168889	CXCL8;BCL2;ATM;BRCA2;KLF4;MLH1;FGF2
MC1R in anti-Inflammatory Signaling	3/44	0.802381	0.999887	0	0	0.695758	0.153187	CXCL8;IRAK3;RAPGEF3
CDH1 Down regulation Promotes Cancer Cell Migration and Metastases	3/44	0.802381	0.999887	0	0	0.695758	0.153187	AFDN;CSNK2A1;EPB41
HIF1A as Master Regulator of Angiogenesis in Cancer	3/44	0.802381	0.999887	0	0	0.695758	0.153187	TSC1;FGF2;MTOR
Genes with Mutations Associated with Retinitis Pigmentosa	4/57	0.803608	0.999887	0	0	0.717538	0.156885	FAM161A;PRPH2;CYP4V2;BEST1
Acute Myeloid Leukemia	6/82	0.803815	0.999887	0	0	0.750416	0.16388	PPP1R15A;CEBPA;KMT2A;BCL2;CBFA2T3;MTOR
Leukocyte Adhesion to Endothelial Cell	2/31	0.807997	0.999887	0	0	0.655862	0.139828	ICAM2;ICAM3
Vascular Endothelial Cell Activation by NO	2/31	0.807997	0.999887	0	0	0.655862	0.139828	NOSTRIN;PTGS2
Vitamine D Deficite and Dentin Formation	2/31	0.807997	0.999887	0	0	0.655862	0.139828	CYP27B1;RAPGEF3
Hippo/YAP1 Signaling	2/31	0.807997	0.999887	0	0	0.655862	0.139828	PARD6A;WBP2
Peripheral T-Cell Tolerance	4/58	0.814463	0.999887	0	0	0.704211	0.144523	CD274;BCL2;TNFRSF14;TNFRSF10A
Effector T-cell Inactivation in Cancer Immune Escape	4/58	0.814463	0.999887	0	0	0.704211	0.144523	CD274;BCL2;TNFRSF10A;ESR1
Splenic Marginal Zone Lymphoma	3/45	0.814621	0.999887	0	0	0.679154	0.139248	CYLD;BCL2;BIRC3
Aldosterone Renal Effects	1/17	0.817231	0.999887	0	0	0.59449	0.119988	WNK1
BDKRB1/2 -> Interleukins Production	1/17	0.817231	0.999887	0	0	0.59449	0.119988	CXCL8
Female Sex Determination	1/17	0.817231	0.999887	0	0	0.59449	0.119988	ESR1
NTRK1/2/3 -> Acetylcholine Production	1/17	0.817231	0.999887	0	0	0.59449	0.119988	IRS2
P2RY1/2/4/6 -> Potassium Channels	1/17	0.817231	0.999887	0	0	0.59449	0.119988	KCNJ2
SIRT7 Signaling in Aging	1/17	0.817231	0.999887	0	0	0.59449	0.119988	MYBBP1A
Protein Nuclear Import and Export	1/17	0.817231	0.999887	0	0	0.59449	0.119988	NXT1
Aldosterone Signaling in Arterial Hypertension	1/17	0.817231	0.999887	0	0	0.59449	0.119988	WNK1
Hutchinson-Gilford Progeria Syndrome	1/17	0.817231	0.999887	0	0	0.59449	0.119988	SREBF1
PGF2-alpha Effect on Treatment	1/17	0.817231	0.999887	0	0	0.59449	0.119988	MMP1
Proteins Involved in Follicular Lymphoma	1/17	0.817231	0.999887	0	0	0.59449	0.119988	BCL2
SOCS3 and PTPN1 in Hypothalamic Neuron Insensitivity to Insulin and Leptin	1/17	0.817231	0.999887	0	0	0.59449	0.119988	IRS2
PI3K/AKT/MTOR Signaling Activation in Cancer	1/17	0.817231	0.999887	0	0	0.59449	0.119988	MTOR
Proteins with Altered Expression in Tumor-Promoting Inflammation	1/17	0.817231	0.999887	0	0	0.59449	0.119988	RELA
NTRK -> FOXO/MYCN Signaling	1/17	0.817231	0.999887	0	0	0.59449	0.119988	IRS2
Pancreatic Neuroendocrine Tumors	5/71	0.817419	0.999887	0	0	0.720116	0.145178	BCL2;CYCS;NRG1;BRCA2;MTOR
Endosomal Recycling	2/32	0.821987	0.999887	0	0	0.633965	0.124276	TFRC;RBSN
Coagulation Factors and PAR1/2 Receptors (F2R/F2RL1) in Endometriosis	2/32	0.821987	0.999887	0	0	0.633965	0.124276	CXCL8;PTGS2
Steroids Induced Cataract	4/59	0.82482	0.999887	0	0	0.691369	0.133151	AFDN;EPB41;IRS2;FGF2
Apoptotic Keratinocytes Clearance Recession in Systemic Lupus Erythematosus	3/46	0.826212	0.999887	0	0	0.663323	0.126631	P2RX7;NLRP1;TLR6
Peripheral Tissue Microangiopathy	3/46	0.826212	0.999887	0	0	0.663323	0.126631	GFPT1;PGM3;UAP1
MERTK Signaling	3/46	0.826212	0.999887	0	0	0.663323	0.126631	CXCL8;PROS1;MTOR
Proteins Involved in Breast Cancer Related to ERBB2/VEGFR/Akt Signaling Pathway	5/72	0.826769	0.999887	0	0	0.709329	0.134936	BCL2;NRG1;PTGS2;MTOR;PELP1
Proteins Involved in Cystic Fibrosis	5/72	0.826769	0.999887	0	0	0.709329	0.134936	PRNP;CXCL8;IFRD1;HMOX1;PTGS2
Proteins Involved in Myocardial Ischemia	20/252	0.832462	0.999887	0	0	0.81837	0.150063	ACE;CXCL8;KMT2A;GDF15;LIF;MTHFR;HMGCR;PTGS2;FGF2;ESR1;MTOR;CTH;BCL2;HMOX1;CYCS;ANG;PPARA;ATF6;ZNF202;ASIC3
Glycolysis	1/18	0.834627	0.999887	0	0	0.559489	0.101139	PGAM2
HTR7 -> IL6 Production	1/18	0.834627	0.999887	0	0	0.559489	0.101139	RPS6KA5
Mast-Cell Activation without Degranulation through IL1R1 and TLR Signaling	1/18	0.834627	0.999887	0	0	0.559489	0.101139	CXCL8
Desmosome Assembly	1/18	0.834627	0.999887	0	0	0.559489	0.101139	PKP4
Exocytosis: Vesicle Trafficking	1/18	0.834627	0.999887	0	0	0.559489	0.101139	RAB3IP
Extracellular Matrix Turnover	1/18	0.834627	0.999887	0	0	0.559489	0.101139	TIMP4
FXN Role in Friedreich Ataxia Progression	1/18	0.834627	0.999887	0	0	0.559489	0.101139	HSPA9
Sperm Motility Impairement in Testicular Male Infertility	1/18	0.834627	0.999887	0	0	0.559489	0.101139	CATSPER1
Toll-like Receptors in Pyelonephritis	1/18	0.834627	0.999887	0	0	0.559489	0.101139	CXCL8
Monoblast -> Promonocyte Surface Expression Markers	1/18	0.834627	0.999887	0	0	0.559489	0.101139	CD68
TGFBR -> CREB/ELK-SRF Signaling	1/18	0.834627	0.999887	0	0	0.559489	0.101139	RPS6KA5
Proteins Involved in Multiple Myeloma	4/60	0.834693	0.999887	0	0	0.678985	0.122687	JAG2;BCL2;PTGS2;DKK1
Hypothalamic-Pituitary-Adrenal Axis in Acute Phase Response	2/33	0.835055	0.999887	0	0	0.61348	0.110584	PTGS2;RAPGEF3
T-Cell Positive Selection and Neglect Induced Death	2/33	0.835055	0.999887	0	0	0.61348	0.110584	BCL2;LAT
Dentin Formation Disruption	2/33	0.835055	0.999887	0	0	0.61348	0.110584	BMP2;EDA2R
Leukocyte Migration toward the Endothelial Cell in Ulcerative Colitis	2/33	0.835055	0.999887	0	0	0.61348	0.110584	CXCL8;PPARG
IL6/IGF1/VEGFA Signaling in Multiple Myeloma	3/47	0.837177	0.999887	0	0	0.648212	0.1152	CXCL8;BCL2;MTOR
Keratinocyte Activation in Psoriatic Arthritis	3/47	0.837177	0.999887	0	0	0.648212	0.1152	CXCL8;ACE;MMP1
TGFBR Signaling in Pancreatic Neoplasms	3/47	0.837177	0.999887	0	0	0.648212	0.1152	BCL2;CYCS;BRCA2
BSG (CD147) in Cancer Cells Motility, Invasion and Survival	3/47	0.837177	0.999887	0	0	0.648212	0.1152	BCL2L11;MMP1;MMP15
AXL Receptor Tyrosine Kinase Signaling	3/47	0.837177	0.999887	0	0	0.648212	0.1152	PROS1;BCL2;MTOR
Mast-Cell Activation via IgE Signaling	6/86	0.838565	0.999887	0	0	0.712737	0.125487	CEBPA;CXCL8;ANG;PPARG;GAB2;LAT
B-Cell Acute Lymphoblastic Leukemia	5/74	0.844301	0.999887	0	0	0.688692	0.116559	CDKN2B;BCL2;GAB2;MTOR;BIRC3
Eosinophil Activation	6/87	0.84643	0.999887	0	0	0.703899	0.11736	CEBPA;CXCL8;LTB4R2;LTB4R;LAT;CCL26
Hepatocellular Carcinoma	8/112	0.846707	0.999887	0	0	0.73081	0.121608	JAG2;ADAM17;PDGFC;BCL2;CYCS;NRG1;MYSM1;MTOR
Leukotriene Effect on Vascular Endothelial Cell Response	2/34	0.847249	0.999887	0	0	0.594276	0.0985075	OCLN;CXCL8
SCF/BTRC Complex	2/34	0.847249	0.999887	0	0	0.594276	0.0985075	DDIT3;MTOR
Monocytes Function in Gout	2/34	0.847249	0.999887	0	0	0.594276	0.0985075	CXCL8;PTGS2
Proteins Involved in Gout	2/34	0.847249	0.999887	0	0	0.594276	0.0985075	CXCL8;ACE
AHR in Intestinal Cell Antimicrobial Barrier Maintenance	1/19	0.850368	0.999887	0	0	0.528377	0.0856425	BCL2
OPRD/OPRM -> Ion Channels	1/19	0.850368	0.999887	0	0	0.528377	0.0856425	RAPGEF3
Corneodesmosomes in Atopic Dermatitis	1/19	0.850368	0.999887	0	0	0.528377	0.0856425	PKP4
Genes with Mutations Associated with Ichthyosis	1/19	0.850368	0.999887	0	0	0.528377	0.0856425	CLDN1
Genes with Mutations Associated with Psoriasis	1/19	0.850368	0.999887	0	0	0.528377	0.0856425	ACE
Glutamate Overdose and Aura Effect in Familial Hemiplegic Migraine Type 3	1/19	0.850368	0.999887	0	0	0.528377	0.0856425	SYT7
Glutamate Overdose and Aura Effect in Migraine Type 2	1/19	0.850368	0.999887	0	0	0.528377	0.0856425	SYT7
Ions Reabsorption Dysregulation in Nephrolithiasis	1/19	0.850368	0.999887	0	0	0.528377	0.0856425	CYP27B1
Proteins Involved in Friedreich Ataxia	1/19	0.850368	0.999887	0	0	0.528377	0.0856425	LONP1
Renin-Angiotensin-Aldosterone System in Myocardial ischemia	1/19	0.850368	0.999887	0	0	0.528377	0.0856425	ACE
Rett Syndrome	1/19	0.850368	0.999887	0	0	0.528377	0.0856425	AR
TP53 Signaling in Hepatocellular Carcinoma	1/19	0.850368	0.999887	0	0	0.528377	0.0856425	CYCS
FBLN5 Potentiates Migration and Proliferation of Endothelial Cells in Cancer	1/19	0.850368	0.999887	0	0	0.528377	0.0856425	MTOR
Hedgehog Signaling Activation by Blocking of Tumor Suppressors	1/19	0.850368	0.999887	0	0	0.528377	0.0856425	BCL2
Hedgehog Signaling Activation in Cancer	1/19	0.850368	0.999887	0	0	0.528377	0.0856425	BCL2
EctodysplasinR -> AP-1 Signaling	1/19	0.850368	0.999887	0	0	0.528377	0.0856425	EDA2R
Receptors and Adaptor Proteins Activated in Cancer	9/125	0.851304	0.999887	0	0	0.737007	0.118648	AR;EFNA3;PROS1;PDGFC;IRS2;NRG1;GAB2;FGF2;ESR1
NFKB Canonical Signaling Activation in Cancer	5/75	0.852502	0.999887	0	0	0.678816	0.108325	CYLD;REL;TNFRSF14;RELA;NFKB2
TGF-beta Signaling	4/62	0.853046	0.999887	0	0	0.655499	0.104186	CDKN2B;PARD6A;XIAP;MTOR
Polycystins Mutation Effects in Cystic Kidney Disease	3/49	0.857322	0.999887	0	0	0.61996	0.0954375	TSC1;LAMTOR3;MTOR
Proteins Involved in Systemic Scleroderma	3/49	0.857322	0.999887	0	0	0.61996	0.0954375	CXCL8;MMP1;PTPN22
Hematopoietic Cell Lineage: B-cell (mouse)	3/49	0.857322	0.999887	0	0	0.61996	0.0954375	CEBPA;BMP2;FNIP1
Huntingtin Gene Mutation in Striatal Neuron	2/35	0.858617	0.999887	0	0	0.576236	0.0878369	SQSTM1;HDAC6
Neurotrophic Factor Deprivation in Retinal Ganglion Cell Death	2/35	0.858617	0.999887	0	0	0.576236	0.0878369	CYCS;IRS2
N2 Neutrophils in Tumor-Promoting Inflammation and Tumor Progression	2/35	0.858617	0.999887	0	0	0.576236	0.0878369	TSC1;MTOR
KRAS Signaling	2/35	0.858617	0.999887	0	0	0.576236	0.0878369	RALA;SPRY2
Endometrioid Ovarian Carcinoma	5/76	0.860341	0.999887	0	0	0.669218	0.100668	BCL2;CYCS;NRG1;ESR1;MTOR
Mast-Cell Activation in Asthma	5/76	0.860341	0.999887	0	0	0.669218	0.100668	CEBPA;CXCL8;PPARG;GAB2;LAT
Basophil Activation in Asthma	4/63	0.861554	0.999887	0	0	0.644354	0.0960197	TSLP;C5AR1;GAB2;LAT
Dendritic Cell Dysfunction in Psoriatic Arthritis	4/63	0.861554	0.999887	0	0	0.644354	0.0960197	CYLD;REL;RELA;NFKB2
Metabolic Reprogramming in Cancer: Overview	4/63	0.861554	0.999887	0	0	0.644354	0.0960197	MPC1;IDH1;RELA;SLC38A5
HTR5 -> TNF Production	1/20	0.864612	0.999887	0	0	0.50054	0.072816	RPS6KA5
Insulin Secretion	1/20	0.864612	0.999887	0	0	0.50054	0.072816	GIPR
POMC Secretion in adenohypophysis	1/20	0.864612	0.999887	0	0	0.50054	0.072816	NR4A2
Vascular Smooth Muscle Cell/Pericyte Differentiation and Proliferation	1/20	0.864612	0.999887	0	0	0.50054	0.072816	KLF4
Exocytosis: Vesicle Priming	1/20	0.864612	0.999887	0	0	0.50054	0.072816	CACNA2D2
Nuclear Lamina Cleavage	1/20	0.864612	0.999887	0	0	0.50054	0.072816	SREBF1
Complement Activation in Glomerulonephritis	1/20	0.864612	0.999887	0	0	0.50054	0.072816	C5AR1
Dopamine Mediated Glutamate Release and Glutamate Uptake Circle	1/20	0.864612	0.999887	0	0	0.50054	0.072816	STX3
Ethanol Induced Efects in Hyperprolactinemia	1/20	0.864612	0.999887	0	0	0.50054	0.072816	FGF2
Genes with Mutations Associated with Asthma	1/20	0.864612	0.999887	0	0	0.50054	0.072816	IRAK3
Keratinocyte Proliferation in Acne Vulgaris	1/20	0.864612	0.999887	0	0	0.50054	0.072816	AR
Myostatin in Skeletal Muscles in Muscular Dystrophies	1/20	0.864612	0.999887	0	0	0.50054	0.072816	ACVR2B
Neurogenic Transcription Factors Role in Hirschsprung Disease	1/20	0.864612	0.999887	0	0	0.50054	0.072816	BMP2
Oxygen Shortage in Myocardial Ischemia	1/20	0.864612	0.999887	0	0	0.50054	0.072816	CYCS
Proteins Involved in Vasospasm	1/20	0.864612	0.999887	0	0	0.50054	0.072816	HMOX1
EGFR/ERBB -> STAT Signaling	1/20	0.864612	0.999887	0	0	0.50054	0.072816	NRG1
Cortisol in Resolving Inflammation	3/50	0.866551	0.999887	0	0	0.606736	0.0869053	ZFP36;CXCL8;PTGS2
Eosinophil Survival in Asthma	3/50	0.866551	0.999887	0	0	0.606736	0.0869053	CXCL8;BCL2;CSF2RB
Glioblastoma, Secondary	3/50	0.866551	0.999887	0	0	0.606736	0.0869053	IDH1;FGF2;MTOR
Natural Killer Cell in Diabetes Mellitus Type 1	3/50	0.866551	0.999887	0	0	0.606736	0.0869053	CD274;LAT;ULBP3
Podocyte Dysfunction in Glomerulonephritis	3/50	0.866551	0.999887	0	0	0.606736	0.0869053	BCL2;CYCS;PPARA
Synovial Fibroblast Activation in Psoriatic Arthritis	3/50	0.866551	0.999887	0	0	0.606736	0.0869053	CXCL8;FZD5;MMP1
Lipoxin A4/FPR2-Related Neutrophil Depression	2/36	0.869206	0.999887	0	0	0.559257	0.0783941	CXCL8;LAT
Estrogen Effects on Pregnancy Gingivitis	2/36	0.869206	0.999887	0	0	0.559257	0.0783941	CXCL8;ESR1
Immune Sustem Activation in Hashimoto's Thyroiditis	2/36	0.869206	0.999887	0	0	0.559257	0.0783941	PTPN22;LAT
Neutrophil Recruitment in Sinovium in Gout	2/36	0.869206	0.999887	0	0	0.559257	0.0783941	CXCL8;CXCL2
Thyroid Dysfunction	2/36	0.869206	0.999887	0	0	0.559257	0.0783941	MTOR;RAPGEF3
Proteins Involved in Breast Cancer Related to ESR1 Signaling Pathway	4/64	0.869638	0.999887	0	0	0.633579	0.0884974	BCL2;ESR1;MTOR;PELP1
T-Cell Acute Lymphoblastic Leukemia	7/103	0.869783	0.999887	0	0	0.692689	0.0966381	JAG2;ADAM17;CDKN2B;BCL2;LAT;MTOR;BIRC3
Proteins Involved in Pulmonary Hypertension	12/165	0.870556	0.999887	0	0	0.744683	0.10323	BMP2;ACE;MME;HTR2B;HLA-DPB1;HMOX1;PPARG;HMGCR;BMPR1B;PTGS2;FGF2;EPOR
Proteins Involved in Ulcerative Colitis	10/141	0.872971	0.999887	0	0	0.724908	0.0984805	CXCL8;TSLP;FASN;PPARG;NOD2;PTGS2;MLH1;FGF2;RELA;F2RL3
Diffuse Large-B-Cell Lymphoma	6/91	0.874817	0.999887	0	0	0.670625	0.0896899	CD274;CDKN2B;BCL2;PTPRK;MTOR;ATR
Hashimoto's Thyroiditis	3/51	0.87525	0.999887	0	0	0.594063	0.0791566	CYCS;PTPN22;LAT
ROS in Angiotensin Mediated Cardiovascular Remodeling and Hypertrophy	3/51	0.87525	0.999887	0	0	0.594063	0.0791566	ADAM17;ACE;MTOR
Proteins Involved in Helicobacter Infections	4/65	0.877311	0.999887	0	0	0.623158	0.0815672	CXCL8;IRAK3;PPARG;PTGS2
Dopamine Synthesis and Release	1/21	0.8775	0.999887	0	0	0.475487	0.062136	TH
ECL-cell: CHGA and Histamine Synthesis	1/21	0.8775	0.999887	0	0	0.475487	0.062136	CXCL8
Nuclear Envelope in Cell Division	1/21	0.8775	0.999887	0	0	0.475487	0.062136	SREBF1
CCL2 Role in CGRP Expression and Release	1/21	0.8775	0.999887	0	0	0.475487	0.062136	SYT7
Dopamine Synthesis and Release in Migraine	1/21	0.8775	0.999887	0	0	0.475487	0.062136	TH
Glutamate Mediated Excitotoxicity in Glaucoma	1/21	0.8775	0.999887	0	0	0.475487	0.062136	CYCS
IL1B Induced Arthralgia	1/21	0.8775	0.999887	0	0	0.475487	0.062136	PTGS2
Proteins Involved in Autistic Disorder and Aggression	1/21	0.8775	0.999887	0	0	0.475487	0.062136	MTOR
Proteins Involved in Mantle Cell Lymphoma	1/21	0.8775	0.999887	0	0	0.475487	0.062136	ATM
Proteins Involved in Pathogenesis of Arrhythmogenic Right Ventricular Cardiomyopathy	1/21	0.8775	0.999887	0	0	0.475487	0.062136	PPARG
TRPM7/8 in Pancreatic Adenocarcinoma	1/21	0.8775	0.999887	0	0	0.475487	0.062136	CXCL8
Dexamethasone Induced Osteoporosis	1/21	0.8775	0.999887	0	0	0.475487	0.062136	DKK1
IGF1R -> ELK/SRF/HIF1A/MYC/SREBF Signaling	1/21	0.8775	0.999887	0	0	0.475487	0.062136	SREBF1
Lipolysis Regulation in Adipocyte	2/37	0.87906	0.999887	0	0	0.543248	0.0700257	LIPE;IRS2
Contraction Due Vasospasm	2/37	0.87906	0.999887	0	0	0.543248	0.0700257	ARHGEF1;LTB4R
Endothelial Cell Dysfunction in Pyelonephritis	2/37	0.87906	0.999887	0	0	0.543248	0.0700257	CXCL8;CXCL2
ERK5/MAPK7 Signaling	2/37	0.87906	0.999887	0	0	0.543248	0.0700257	PTPRR;WNK1
P38 MAPK/MAPK14 Signaling	2/37	0.87906	0.999887	0	0	0.543248	0.0700257	RPS6KA5;RELA
Ovarian Cancer	9/130	0.880504	0.999887	0	0	0.706356	0.0898917	JAG2;PDGFC;BCL2;CYCS;ATM;NRG1;BRCA2;ESR1;MTOR
Proteins Involved in Alzheimer's Disease	9/130	0.880504	0.999887	0	0	0.706356	0.0898917	PRNP;ACE;MME;NOTCH4;BCL2;PPARG;HMGCR;PTGS2;MTOR
Proteins Involved in Hepatocellular Carcinoma	9/130	0.880504	0.999887	0	0	0.706356	0.0898917	AR;PLPP5;PDGFC;BCL2;ANG;PPARA;FGF2;ESR1;MTOR
Mantle Cell Lymphoma	7/105	0.881941	0.999887	0	0	0.678477	0.085237	ADAM17;BCL2L11;BCL2;XIAP;ATM;MTOR;ATR
Proteins Involved in Male Infertility	14/193	0.8878	0.999887	0	0	0.742313	0.0883418	CATSPER1;ATP8A1;MTHFR;MLH1;CLDN1;ESR1;LRP8;LIPE;AR;ADAM17;CLDN3;P2RX1;PICK1;TSSK6
Blau Syndrome	2/38	0.888225	0.999887	0	0	0.528129	0.0625995	NOD2;NLRP1
EDN, NRG, NRTN, and GDNF/RET Signaling in Hirschsprung Disease	2/38	0.888225	0.999887	0	0	0.528129	0.0625995	NRG1;ARHGEF1
Genes with Mutations Associated with Testicular Male Infertility	2/38	0.888225	0.999887	0	0	0.528129	0.0625995	CATSPER1;AR
Hematopoietic Cell Lineage: B-cell	2/38	0.888225	0.999887	0	0	0.528129	0.0625995	BMP2;MME
Epithelial Cell in the Innate Immune Response in Ulcerative Colitis	1/22	0.889162	0.999887	0	0	0.452819	0.0531956	PPARG
Myocarditis, Acute Viral Overiew	1/22	0.889162	0.999887	0	0	0.452819	0.0531956	CD55
Proteins Involved in Celiac Disease	1/22	0.889162	0.999887	0	0	0.452819	0.0531956	BCL2
Proteins Involved in Photoaging	1/22	0.889162	0.999887	0	0	0.452819	0.0531956	MMP1
DNMT and MBD Families Activation in DNA Methylation in Cancer	1/22	0.889162	0.999887	0	0	0.452819	0.0531956	MBD4
IL4R -> ELK/SRF/HMGY Signaling	1/22	0.889162	0.999887	0	0	0.452819	0.0531956	IRS2
TNF-alpha/TNFRSF1B Signaling	1/22	0.889162	0.999887	0	0	0.452819	0.0531956	BIRC3
Alveolar Epithelial Cell Dysfunction in COPD	4/67	0.89149	0.999887	0	0	0.603308	0.0692967	WRN;CXCL8;MMP1;HMOX1
Endothelial Cell Dysfunction in Pulmonary Hypertension	4/67	0.89149	0.999887	0	0	0.603308	0.0692967	ARG2;BMP2;ARHGEF1;BMPR1B
Melanoma	10/145	0.893032	0.999887	0	0	0.703273	0.0795629	JAG2;ADAM17;CDKN2B;CXCL8;FZD5;MMP1;NOTCH4;BCL2;BIRC7;MTOR
Proteins Involved in Arterial Hypertension	19/255	0.895013	0.999887	0	0	0.763697	0.0847069	ARG2;ACE;CXCL8;MMP1;LRRK2;HTR2B;MTHFR;HMGCR;PTGS2;CLCN3;ESR1;MTOR;WNK1;NEDD4;BCL2;CYP1B1;PPARG;PPARA;ATR
Proteins Involved in Myocarditis	15/207	0.895395	0.999887	0	0	0.741339	0.0819111	CD274;ACE;KMT2A;TREX1;HMGCR;PTGS2;CXCL2;ADAM17;BMP2;NAMPT;HMOX1;PPARG;TLR6;PPARA;CD55
Cell Cycle Dysregulation in Melanoma	2/39	0.896741	0.999887	0	0	0.513826	0.0560012	CDKN2B;MTOR
PTPN22 Role in Rheumatoid Arthritis	2/39	0.896741	0.999887	0	0	0.513826	0.0560012	PTPN22;LAT
TNFR -> AP-1/ATF/TP53 Signaling	2/39	0.896741	0.999887	0	0	0.513826	0.0560012	TNFRSF14;TNFRSF10A
Catecholamines Secretion from Adrenal Gland	3/54	0.898397	0.999887	0	0	0.559025	0.0598956	NAPA;TH;RAB3IP
NPY1R -> CRH/POMC Production	1/23	0.899714	0.999887	0	0	0.432213	0.0456757	CAMKK1
Scavenger Receptors in Platelet Activation	1/23	0.899714	0.999887	0	0	0.432213	0.0456757	LAT
Somatostatin Receptors Signaling	1/23	0.899714	0.999887	0	0	0.432213	0.0456757	PTGS2
APC/C-FZR1 Complex	1/23	0.899714	0.999887	0	0	0.432213	0.0456757	ANAPC10
CUL4/CRL (SCF4) Complex	1/23	0.899714	0.999887	0	0	0.432213	0.0456757	LIG1
BDNF Upregulation Triggered by Seizures	1/23	0.899714	0.999887	0	0	0.432213	0.0456757	IRS2
beta-Catenin/Androgen Receptor Signaling in Prostate Cancer	1/23	0.899714	0.999887	0	0	0.432213	0.0456757	AR
Bone Resorption in Hyperparathyroidism	1/23	0.899714	0.999887	0	0	0.432213	0.0456757	BMP2
Complement System Defects in Systemic Lupus Erythematosis	1/23	0.899714	0.999887	0	0	0.432213	0.0456757	C5AR1
Hodgkin and Reed-Sternberg Cells Reprogramming	1/23	0.899714	0.999887	0	0	0.432213	0.0456757	ADAM17
Proteins Involved in Hirschsprung Disease	1/23	0.899714	0.999887	0	0	0.432213	0.0456757	NRG1
Telogen Maintenance in Androgenic Alopecia	1/23	0.899714	0.999887	0	0	0.432213	0.0456757	DKK1
Toll-like Receptors (TLR) in Antiviral Innate Immune Response	1/23	0.899714	0.999887	0	0	0.432213	0.0456757	CXCL8
ActivinR -> SMAD2/3 Signaling	1/23	0.899714	0.999887	0	0	0.432213	0.0456757	ACVR2B
EGFR -> SMAD1 Signaling	1/23	0.899714	0.999887	0	0	0.432213	0.0456757	NRG1
ICAM1 -> AP-1/CREB/ELK/SRF Signaling	1/23	0.899714	0.999887	0	0	0.432213	0.0456757	RPS6KA5
Growth Factor Signaling in Hepatocellular Carcinoma	5/82	0.900351	0.999887	0	0	0.616866	0.0647526	PDGFC;BCL2;CYCS;NRG1;MTOR
EDNRA/B -> Vascular Motility	2/40	0.904649	0.999887	0	0	0.500277	0.0501319	RPS6KA5;ARHGEF1
Proteins Involved in Azoospermia	2/40	0.904649	0.999887	0	0	0.500277	0.0501319	AR;ATM
Proteins Involved in Noise-Induced Hearing Loss	2/40	0.904649	0.999887	0	0	0.500277	0.0501319	BCL2;XIAP
Dendritic Cell Activation in Systemic Lupus Erythematosis	3/55	0.905207	0.999887	0	0	0.548244	0.0546004	TREX1;TLR6;NLRP1
Endothelial Cell Dysfunction in Glomerulonephritis	3/55	0.905207	0.999887	0	0	0.548244	0.0546004	CXCL8;CXCL2;F2RL3
Proteins Involved in Breast Cancer Related to IGF1R/Akt Signaling Pathway	3/55	0.905207	0.999887	0	0	0.548244	0.0546004	BCL2;MTOR;PELP1
Hodgkin Lymphoma	7/110	0.90824	0.999887	0	0	0.645362	0.0621137	ADAM17;CXCL8;BCL2;XIAP;PTPRK;FGF2;MTOR
Follicular Lymphoma	6/97	0.909059	0.999887	0	0	0.6262	0.059705	AR;CDKN2B;BCL2;TNFRSF14;ATM;MTOR
CHRM1/2/3/5 -> Ion Channels	1/24	0.909262	0.999887	0	0	0.413398	0.0393234	KCNJ2
Insulin Influence on Glycogenesis	1/24	0.909262	0.999887	0	0	0.413398	0.0393234	IRS2
Antiphospholipid Antibodies and Endothelial Cell Interaction	1/24	0.909262	0.999887	0	0	0.413398	0.0393234	CXCL8
Antiphospholipid Antibodies in Endothelial Cell	1/24	0.909262	0.999887	0	0	0.413398	0.0393234	CXCL8
Proteins Involved in Congenital Deafness	1/24	0.909262	0.999887	0	0	0.413398	0.0393234	MYH15
Proteins Involved in Fragile X Syndrome	1/24	0.909262	0.999887	0	0	0.413398	0.0393234	ESR1
Proteins Involved in Graves Disease	1/24	0.909262	0.999887	0	0	0.413398	0.0393234	HLA-DPB1
Proteins Involved in Hashimoto's Thyroiditis	1/24	0.909262	0.999887	0	0	0.413398	0.0393234	PTGS2
Synaptic Exocytosis in Dementia	1/24	0.909262	0.999887	0	0	0.413398	0.0393234	SNPH
WNT Signaling in Melanoma	1/24	0.909262	0.999887	0	0	0.413398	0.0393234	FZD5
Lactate as a Signaling Molecule in Cancer Cells	1/24	0.909262	0.999887	0	0	0.413398	0.0393234	CXCL8
HIF1 Signaling	1/24	0.909262	0.999887	0	0	0.413398	0.0393234	ANG
Cholesteatoma	4/70	0.910062	0.999887	0	0	0.57579	0.054264	NR4A2;BMP2;CXCL8;KLF4
Chronic Myeloid Leukemia	4/70	0.910062	0.999887	0	0	0.57579	0.054264	CEBPA;BCL2;GAB2;MTOR
Growth Factor Signaling in Pancreatic Neoplasms	4/70	0.910062	0.999887	0	0	0.57579	0.054264	BCL2;CYCS;NRG1;MTOR
Toll-like Receptors Act through MYD88-TIRAP Signaling	2/41	0.911988	0.999887	0	0	0.487422	0.0449054	CXCL8;TLR6
Astrocytoma	2/41	0.911988	0.999887	0	0	0.487422	0.0449054	IDH1;MTOR
Proteins Involved in Huntington Disease	6/98	0.913899	0.999887	0	0	0.619359	0.0557638	CEBPA;ADK;PPARG;FGF2;HDAC6;MTOR
Neutrophil Activation via Adherence on Endothelial Cells	3/57	0.917601	0.999887	0	0	0.52788	0.0453938	CXCL8;MME;ICAM2
beta-Cell Destruction through Cytokines in Diabetes Mellitus	3/57	0.917601	0.999887	0	0	0.52788	0.0453938	BCL2;HMOX1;CYCS
CFTR Facilitates Oxidative Stress in Airway Epithelium in CF	3/57	0.917601	0.999887	0	0	0.52788	0.0453938	CXCL8;ADORA2B;SLC7A11
Prolactinoma Overiew	3/57	0.917601	0.999887	0	0	0.52788	0.0453938	LIF;NRG1;FGF2
ADRA2C/ADRB2 -> Vasoconstriction	1/25	0.917901	0.999887	0	0	0.396151	0.0339365	ADRA2C
Leptin and CCK8 Activate Nodose Ganglia Neuron	1/25	0.917901	0.999887	0	0	0.396151	0.0339365	IRS2
CD8+ T-Cell Response to Self-Determinants in Diabetes	1/25	0.917901	0.999887	0	0	0.396151	0.0339365	LAT
Familial Mediterranean Fever	1/25	0.917901	0.999887	0	0	0.396151	0.0339365	P2RX7
Hereditary Hemorrhagic Telangiectasia	1/25	0.917901	0.999887	0	0	0.396151	0.0339365	ATF3
Sebocyte Proliferation in Acne Vulgaris	2/42	0.918794	0.999887	0	0	0.475211	0.0402469	PPARG;PPARA
Clozapine Induced Granulocytopenia	2/42	0.918794	0.999887	0	0	0.475211	0.0402469	RPS6KA5;PTGS2
Proteins Involved in Systemic Lupus Erythematosus	4/72	0.920818	0.999887	0	0	0.558793	0.0460966	ACE;BCL2;PTGS2;ESR1
Proteins with Altered Expression in Cancer-Associated Evading of Growth Suppressors	3/58	0.923227	0.999887	0	0	0.518254	0.0413983	CYLD;NEDD4;TSC1
Dendritic Cell Dysfunction in Crohn's disease	2/43	0.925103	0.999887	0	0	0.463594	0.0360909	IRAK3;NOD2
Graves Ophthalmopathy	2/43	0.925103	0.999887	0	0	0.463594	0.0360909	CEBPA;PPARA
IgE Induces Airway Smooth Muscle Cell Proliferation	2/43	0.925103	0.999887	0	0	0.463594	0.0360909	TSLP;GAB2
ADRA2C/ADRB2 -> Synaptic Endocytosis	1/26	0.925718	0.999887	0	0	0.380284	0.0293523	ADRA2C
Melatonin Effects on Circadian Cycle	1/26	0.925718	0.999887	0	0	0.380284	0.0293523	BCL2
PTGER2/3 -> Inflammation-Related Expression Targets	1/26	0.925718	0.999887	0	0	0.380284	0.0293523	CXCL8
Cryopyrin (NLPR3) Associated Periodic Syndromes	1/26	0.925718	0.999887	0	0	0.380284	0.0293523	P2RX7
Microglia and Motor Neuron Interaction Dysregulation	1/26	0.925718	0.999887	0	0	0.380284	0.0293523	ADAM17
PAPA Syndrome	1/26	0.925718	0.999887	0	0	0.380284	0.0293523	P2RX7
Proteins with Altered Expression in Medulloblastoma	1/26	0.925718	0.999887	0	0	0.380284	0.0293523	NRG1
Respiratory Chain Impairment in Cancer	1/26	0.925718	0.999887	0	0	0.380284	0.0293523	MTOR
T-Cell Receptor -> NFATC Signaling	1/26	0.925718	0.999887	0	0	0.380284	0.0293523	LAT
TGFB Signaling activation by Blocking of Tumor Suppressors	4/73	0.92575	0.999887	0	0	0.550664	0.042484	CDKN2B;PARD6A;XIAP;MTOR
Proteins Involved in Psoriasis	3/59	0.928498	0.999887	0	0	0.508971	0.0377588	CXCL8;PTGS2;CCL28
Alveolar Macrophage Negative Regulation Declined in COPD	2/44	0.930947	0.999887	0	0	0.452531	0.03238	CXCL8;LY96
HRAS Signaling	2/44	0.930947	0.999887	0	0	0.452531	0.03238	RALA;RELA
Ras-GRF Regulation Signaling	2/44	0.930947	0.999887	0	0	0.452531	0.03238	DGKI;RAPGEF3
NTSR1 Expression Targets	1/27	0.932792	0.999887	0	0	0.365638	0.0254387	CXCL8
Peroxisome Protein Import and Peroxisome Division	1/27	0.932792	0.999887	0	0	0.365638	0.0254387	PPARG
Endothelin Signaling in Arterial Hypertension	1/27	0.932792	0.999887	0	0	0.365638	0.0254387	NR4A2
Inherited Channelopathies	1/27	0.932792	0.999887	0	0	0.365638	0.0254387	EFHC1
MIF Role in Cholesteatoma	1/27	0.932792	0.999887	0	0	0.365638	0.0254387	NR4A2
Osteoblast Function Decline in Gout	1/27	0.932792	0.999887	0	0	0.365638	0.0254387	BMP2
Proteins Involved in Ichthyosis	1/27	0.932792	0.999887	0	0	0.365638	0.0254387	CLDN1
WNT Canonical Signaling Activation in Cancer	1/27	0.932792	0.999887	0	0	0.365638	0.0254387	CSNK2A1
FcIgER -> ELK-SRF Signaling	1/27	0.932792	0.999887	0	0	0.365638	0.0254387	LAT
FGFR -> RUNX2 Signaling	1/27	0.932792	0.999887	0	0	0.365638	0.0254387	FGF2
CagA Phosphorylation Dependent Signaling	2/45	0.936357	0.999887	0	0	0.441983	0.0290639	ADAM17;BCL2
Dendritic Cells Function in Atherosclerosis	2/45	0.936357	0.999887	0	0	0.441983	0.0290639	CXCL8;TLR6
Hemapoietic Stem Cell -> Lymphoid Multipotent Progenitor Surface Expression Markers	2/45	0.936357	0.999887	0	0	0.441983	0.0290639	CD274;EPOR
Mast-Cells De Novo Synthesized Mediators via IgE Independent Signaling	5/90	0.937975	0.999887	0	0	0.55856	0.0357659	CXCL8;P2RY11;ADORA2B;C5AR1;PTGS2
Neuroblastoma	8/131	0.938678	0.999887	0	0	0.617268	0.0390625	ADAM17;BMP2;TH;HEY1;MAX;BCL2;IRS2;MTOR
Histone Methylation	1/28	0.939192	0.999887	0	0	0.352076	0.0220878	KDM6B
Familial Cold Autoinflammatory Syndrome 2	1/28	0.939192	0.999887	0	0	0.352076	0.0220878	P2RX7
Il17 Signaling Related Neutrophilia in Asthma	1/28	0.939192	0.999887	0	0	0.352076	0.0220878	CXCL8
Proteins Involved in Hypogonadotropic Hypogonadism	1/28	0.939192	0.999887	0	0	0.352076	0.0220878	CHD7
EGFR -> NCOR2 Signaling	1/28	0.939192	0.999887	0	0	0.352076	0.0220878	NRG1
CHRM1 -> IL2 Production	1/29	0.944982	0.999887	0	0	0.339483	0.019211	RPS6KA5
Eat me Signal: Apoptotic Cell Induces Phagocytosis	1/29	0.944982	0.999887	0	0	0.339483	0.019211	PROS1
HTR1 -> IL6 Production	1/29	0.944982	0.999887	0	0	0.339483	0.019211	RPS6KA5
Lamellipodia and Filopodia Formation in Cancer	1/29	0.944982	0.999887	0	0	0.339483	0.019211	RHOF
S/G2 Phase Transition	1/29	0.944982	0.999887	0	0	0.339483	0.019211	CCP110
CD4+ T-Cell Death in HIV	1/29	0.944982	0.999887	0	0	0.339483	0.019211	LAT
Dystrophin Glycoprotein Complex Signaling in Muscular Dystrophies	1/29	0.944982	0.999887	0	0	0.339483	0.019211	MTOR
FLT3/KIT/MLL Signaling in Leukemia	1/29	0.944982	0.999887	0	0	0.339483	0.019211	KMT2A
RARA Signaling in Acute Myeloid Leukemia (M3)	1/29	0.944982	0.999887	0	0	0.339483	0.019211	CEBPA
RAS/RAF/MAPK Signaling Activation in Cancer	1/29	0.944982	0.999887	0	0	0.339483	0.019211	RALA
TNFRSF1A -> CREB/ELK-SRF Signaling	1/29	0.944982	0.999887	0	0	0.339483	0.019211	RPS6KA5
Proteins Involved in Astrocytoma	5/92	0.945122	0.999887	0	0	0.545659	0.030798	GPNMB;HSPA5;MMP1;ATM;FGF2
Growth Factor Signaling in Neuroblastoma	2/47	0.945995	0.999887	0	0	0.422292	0.023445	BCL2;IRS2
Genes with Mutations in Cancer-Associated Evading of Growth Suppressors	2/47	0.945995	0.999887	0	0	0.422292	0.023445	CYLD;TSC1
ERK/MAPK Canonical Signaling	2/47	0.945995	0.999887	0	0	0.422292	0.023445	LAMTOR3;RAPGEF3
IDO1 in Cancer Immune Escape	3/63	0.94642	0.999887	0	0	0.474934	0.0261539	JAG2;MTOR;NFKB2
Vitiligo	4/78	0.946493	0.999887	0	0	0.513314	0.0282278	CXCL8;BCL2;CYCS;PTPN22
Multiple Myeloma	7/121	0.948967	0.999887	0	0	0.582734	0.0305243	JAG2;CYLD;ADAM17;BCL2;FGF2;DKK1;MTOR
Basophil Activation	4/79	0.949944	0.999887	0	0	0.506442	0.0260067	TSLP;C5AR1;GAB2;LAT
Proplatelet Maturation	4/79	0.949944	0.999887	0	0	0.506442	0.0260067	CXCL8;CSF2RB;PTGS2;EPOR
Th0-Cell Aberrant Activation in Systemic Lupus Erythematosus	4/79	0.949944	0.999887	0	0	0.506442	0.0260067	CYCS;TNFRSF10A;MTOR;LAT
Neutrophil Degranulation via FPR1/IL8	3/64	0.950196	0.999887	0	0	0.467122	0.0238637	CXCL8;MME;ICAM2
ADRA1A -> IL6 Production	1/30	0.950222	0.999887	0	0	0.327759	0.0167353	RPS6KA5
Thyroid Hormones Common Genomic Effects in Hyperthyroidism	1/30	0.950222	0.999887	0	0	0.327759	0.0167353	PPARG
CD8+ T-Cell Action Impairment in HIV Type 1 Infection	1/30	0.950222	0.999887	0	0	0.327759	0.0167353	LAT
Enamel Formation Disruption	1/30	0.950222	0.999887	0	0	0.327759	0.0167353	BMP2
IL36 Receptor Antagonist (IL1F5) Deficiency (DITRA)	1/30	0.950222	0.999887	0	0	0.327759	0.0167353	CXCL8
Proteins Involved in Dental Caries	1/30	0.950222	0.999887	0	0	0.327759	0.0167353	CCL28
Sarcomere Disorganization and Intracellular Calcium Overload	1/30	0.950222	0.999887	0	0	0.327759	0.0167353	MYOZ2
Negative Acute Phase Proteins Synthesis	2/48	0.950275	0.999887	0	0	0.413089	0.0210691	CEBPA;PPARA
T-Cell Cytotoxic Mediated Cell Death	2/48	0.950275	0.999887	0	0	0.413089	0.0210691	CYCS;TNFRSF10A
Vascular Smooth Muscle Cell/Pericyte Migration and Proliferation	2/48	0.950275	0.999887	0	0	0.413089	0.0210691	ADAM17;FGF2
Bone Loss in Osteoporosis	2/48	0.950275	0.999887	0	0	0.413089	0.0210691	BMP2;DKK1
Glioblastoma, Primary	2/48	0.950275	0.999887	0	0	0.413089	0.0210691	FGF2;MTOR
EGFR/ERBB3 -> MEF/MYOD/NFATC/MYOG Signaling	2/48	0.950275	0.999887	0	0	0.413089	0.0210691	NRG1;CAMKK1
Natural Killer Cell Activation	3/65	0.953723	0.999887	0	0	0.459563	0.021775	ICAM2;LAT;ULBP3
Skin Aging	2/49	0.954231	0.999887	0	0	0.404278	0.0189404	MMP1;PTPRK
EGFR -> AP-1/CREB/ELK/SRF/MYC Signaling	2/49	0.954231	0.999887	0	0	0.404278	0.0189404	RPS6KA5;NRG1
Aldosterone Synthesis Chronic Regulation	1/31	0.954963	0.999887	0	0	0.316816	0.0145998	NR4A2
GNRH Signaling Impairment in Hypogonadotrophic Hypogonadism	1/31	0.954963	0.999887	0	0	0.316816	0.0145998	ESR1
Neutrophil and Macrophage Function in Systemic Lupus Erythematosus	1/31	0.954963	0.999887	0	0	0.316816	0.0145998	LAT
Osteoblast Function Decline in Osteoporosis	1/31	0.954963	0.999887	0	0	0.316816	0.0145998	ESR1
CD38/CD3 -> JUN/FOS/NF-kB Signaling in T-cell Proliferation	1/31	0.954963	0.999887	0	0	0.316816	0.0145998	LAT
Neutrophil Recruitment and Priming	3/66	0.957015	0.999887	0	0	0.452243	0.0198698	CXCL8;PPARG;LTB4R
B-Cell Activation in Crohn's Disease	1/32	0.959252	0.999887	0	0	0.306579	0.0127541	LAT
Endothelial Cell Dysfunction in Arterial Hypertension	1/32	0.959252	0.999887	0	0	0.306579	0.0127541	PTGS2
Glutamate Toxiicity Effects on Striatum Medium Spiny Neurons in Hantington's Disease	1/32	0.959252	0.999887	0	0	0.306579	0.0127541	CYCS
Myostatin-IGF1 Crosstalk in Skeletal Muscles in Muscular Dystrophies	1/32	0.959252	0.999887	0	0	0.306579	0.0127541	ACVR2B
non-Hereditary Genetic Rearrangements in Neuroblastoma	1/32	0.959252	0.999887	0	0	0.306579	0.0127541	MAX
Ovulation Block	1/32	0.959252	0.999887	0	0	0.306579	0.0127541	AR
T-Cell Receptor -> ATF/CREB Signaling	1/32	0.959252	0.999887	0	0	0.306579	0.0127541	RPS6KA5
TNF-alpha/TNFRSF1A Signaling	1/32	0.959252	0.999887	0	0	0.306579	0.0127541	PGAM5
Proteins Involved in Endometriosis	17/256	0.959513	0.999887	0	0	0.673902	0.0278523	CEBPA;CXCL8;MME;GDF15;MMP1;SRA1;PTGS2;FGF2;ESR1;MTOR;AR;ADAM17;CLDN3;MMP16;BCL2;PPARG;BIRC3
Vascular Endothelial Cell Activation by Growth Factors	2/51	0.961257	0.999887	0	0	0.387734	0.0153208	PROS1;PTGS2
Airway Epithelial Cell Dysfunction	2/51	0.961257	0.999887	0	0	0.387734	0.0153208	CXCL8;ADORA2B
Myocardial Remodeling	2/51	0.961257	0.999887	0	0	0.387734	0.0153208	MMP1;MTOR
NTRK -> AP-1/CREB/ELK/SRF/MYC/SMAD3/TP53 Signaling	2/51	0.961257	0.999887	0	0	0.387734	0.0153208	RPS6KA5;IRS2
T-Cell Maturation (Hypothesis)	3/68	0.962951	0.999887	0	0	0.438279	0.0165463	CXCL8;BCL2;LAT
Autocrine Cytokine/Chemokine Loops in Systemic Scleroderma	1/33	0.963133	0.999887	0	0	0.296982	0.0111557	PDGFC
IGF1 Role in Muscle Hypertrophy	1/33	0.963133	0.999887	0	0	0.296982	0.0111557	IRS2
Overt Hypothyroidism, Primary	1/33	0.963133	0.999887	0	0	0.296982	0.0111557	RAPGEF3
Thyroid Stimulating Hormone (TSH) Resistance in Congenital Hypothyroidism	1/33	0.963133	0.999887	0	0	0.296982	0.0111557	RAPGEF3
EphrinB -> MAPK/JUN/FOS Signaling	1/33	0.963133	0.999887	0	0	0.296982	0.0111557	EFNA3
T-Cell Receptor -> AP-1 Signaling	1/33	0.963133	0.999887	0	0	0.296982	0.0111557	LAT
VEGF Independent Angiogenesis in Cancer	2/52	0.964369	0.999887	0	0	0.379958	0.0137852	FGF2;MTOR
Proteins Involved in Hearing Loss	13/209	0.966298	0.999887	0	0	0.628575	0.0215493	TPMT;MYH15;SPNS2;CHD7;XIAP;PTGS2;PRPH2;DDIT3;NEU1;ASIC3;PDZD7;SLC19A2;TPRN
Natural Killer Cell Activation through ITSM-Containing Receptors	1/34	0.966645	0.999887	0	0	0.287966	0.00976898	LAT
CCR5 Signaling in Macrophages	1/34	0.966645	0.999887	0	0	0.287966	0.00976898	RELA
Diabetes Induced Periodontitis	1/34	0.966645	0.999887	0	0	0.287966	0.00976898	CXCL8
OipA Signaling in Helicobacter Pylori Infection	1/34	0.966645	0.999887	0	0	0.287966	0.00976898	CXCL8
TSLP Signaling in Bronchial Epithelial Cell in Asthma	1/34	0.966645	0.999887	0	0	0.287966	0.00976898	TSLP
NGFR -> AP-1/CEBPB/CREB/ELK/SRF/TP53 Signaling	1/34	0.966645	0.999887	0	0	0.287966	0.00976898	RPS6KA5
Muscular Dystrophies	2/53	0.967241	0.999887	0	0	0.372487	0.0124068	BCL2;MTOR
GFs/TNF -> Ion Channels	1/35	0.969822	0.999887	0	0	0.279481	0.00856401	IRS2
WNT Signaling in Breast Cancer	1/35	0.969822	0.999887	0	0	0.279481	0.00856401	TCF7
Airway Smooth Muscle Cell High Rate Proliferation	2/54	0.969888	0.999887	0	0	0.365304	0.0111689	LAMA1;FGF2
Mast-Cells Activation in Atopic Dermatitis	2/54	0.969888	0.999887	0	0	0.365304	0.0111689	CXCL8;LAT
Proteins Involved in Multiple Sclerosis	2/54	0.969888	0.999887	0	0	0.365304	0.0111689	LIF;PTGS2
G0/G1 Cell Cycle Phase Transition Activation in Cancer	2/54	0.969888	0.999887	0	0	0.365304	0.0111689	CDKN2B;RELA
FGFR -> AP-1/CREB/CREBBP/ELK/SRF/MYC Signaling	2/54	0.969888	0.999887	0	0	0.365304	0.0111689	RPS6KA5;FGF2
Proteins Involved in Melanoma	15/238	0.970639	0.999887	0	0	0.637178	0.018988	CDKN2B;CXCL8;GDF15;MMP1;IDH1;XIAP;PTGS2;FGF2;RELA;MTOR;CYLD;BCL2L11;BCL2;PPARG;BIRC7
Th1-Cell Function in Systemic Lupus Erythematosus	2/55	0.972329	0.999887	0	0	0.358391	0.0100568	MTOR;LAT
Th2-Cell Function in Systemic Lupus Erythematosus	2/55	0.972329	0.999887	0	0	0.358391	0.0100568	MTOR;LAT
Eosinophil Survival by Cytokine Signaling	3/72	0.972582	0.999887	0	0	0.41278	0.0114755	CXCL8;BCL2;CSF2RB
Thyroid Hormones Common non-Genomic Effects in Hyperthyroidism	1/36	0.972697	0.999887	0	0	0.271481	0.00751534	ESR1
Cochlear Hair Cell Stereocilia Proteins Mutations (Congenital Deafness)	1/36	0.972697	0.999887	0	0	0.271481	0.00751534	TPRN
Hyperparathyroidism, Secondary Effect	1/36	0.972697	0.999887	0	0	0.271481	0.00751534	BMP2
WNT Signaling Activation by Blocking of Tumor Suppressors	1/36	0.972697	0.999887	0	0	0.271481	0.00751534	DKK1
JNK/MAPK Signaling	1/36	0.972697	0.999887	0	0	0.271481	0.00751534	MAP3K13
PI3K/RAC1 Signaling	1/36	0.972697	0.999887	0	0	0.271481	0.00751534	PIK3C2A
Proteins Involved in B-Cell Chronic Lymphocytic Leukemia	2/56	0.974578	0.999887	0	0	0.351735	0.0090573	BCL2;ATM
Vascular Endothelial Cell Permeability Activation	1/37	0.975298	0.999887	0	0	0.263925	0.00660138	OCLN
Plasmacytoid Dendritic Cell in Diabetes Mellitus Type 1	1/37	0.975298	0.999887	0	0	0.263925	0.00660138	CD274
Th1-Cell Activation in Crohn's Disease	1/37	0.975298	0.999887	0	0	0.263925	0.00660138	LAT
PDGFR -> AP-1/MYC Signaling	1/37	0.975298	0.999887	0	0	0.263925	0.00660138	PDGFC
VEGFR -> ATF/CREB/ELK-SRF Signaling	1/37	0.975298	0.999887	0	0	0.263925	0.00660138	RPS6KA5
Angiogenesis in Endometriosis	2/57	0.97665	0.999887	0	0	0.345321	0.00815878	PTGS2;MTOR
HPV E6 and E7 Induced Disruption of TNFR/NF-kB Signaling in Keratinocytes	2/57	0.97665	0.999887	0	0	0.345321	0.00815878	CXCL8;BCL2
MITF as a Regulator of Melanoma Cell Development	2/57	0.97665	0.999887	0	0	0.345321	0.00815878	BCL2;BIRC7
Osteoclast Activation in Rheumatoid Arthritis	2/57	0.97665	0.999887	0	0	0.345321	0.00815878	XIAP;BIRC3
Synovial Fibroblast Proliferation in Rheumatoid Arthritis	2/57	0.97665	0.999887	0	0	0.345321	0.00815878	FGF2;ACVR2B
Proteins Involved in Epilepsy	17/270	0.977624	0.999887	0	0	0.636112	0.014395	PRNP;LRRK2;ADK;TSC1;NRG1;HSPBAP1;PTGS2;FGF2;TSN;MTOR;PCMT1;GLRB;IRAK2;BCL2;EFHC1;NCDN;SLC25A22
Mineralcorticoids Secretion Regulation	1/38	0.977651	0.999887	0	0	0.256778	0.00580377	NR4A2
Proteins Involved in Pulmonary Emphysema	1/38	0.977651	0.999887	0	0	0.256778	0.00580377	HMOX1
TNF and IL1B Induce Metalloproteinase Synthesis in Osteoarthritis	1/38	0.977651	0.999887	0	0	0.256778	0.00580377	MMP1
HGFR -> AP-1/CREB/MYC Signaling	1/38	0.977651	0.999887	0	0	0.256778	0.00580377	RPS6KA5
Metastatic Colorectal Cancer	6/121	0.977791	0.999887	0	0	0.494854	0.0111138	CEBPA;CXCL8;BCL2;PPARG;PTGS2;MLH1
Glioma Invasion Signaling	3/75	0.978192	0.999887	0	0	0.395515	0.00872071	ADAM17;MMP1;FGF2
Integrins in Cancer Cell Motility, Invasion and Survival	3/75	0.978192	0.999887	0	0	0.395515	0.00872071	BCL2;IRS2;PTGS2
Proteins Involved in Glioblastoma	10/178	0.978459	0.999887	0	0	0.564092	0.012284	IDH1;PDGFC;ATM;HMGCR;LRIG2;BRCA2;PTGS2;FGF2;MTOR;ACAT1
Mucosa-Associated Lymphoid Tissue (MALT) Lymphoma	2/58	0.978558	0.999887	0	0	0.339135	0.00735076	BCL2;TLR6
Osteoclast Activation in Gout	2/58	0.978558	0.999887	0	0	0.339135	0.00735076	XIAP;BIRC3
VEGF Signaling	2/58	0.978558	0.999887	0	0	0.339135	0.00735076	PTGS2;MTOR
CNR1/2 -> IL1B/2/4/6/10 Production	1/39	0.97978	0.999887	0	0	0.250007	0.00510684	RPS6KA5
DRD2 Expression Targets	1/39	0.97978	0.999887	0	0	0.250007	0.00510684	RPS6KA5
Cardiovascular Effects in Hyperthyroidism	1/39	0.97978	0.999887	0	0	0.250007	0.00510684	MTOR
TRPM4/6/7/8 Signaling in Arterial Hypertension (Hypothesis)	1/39	0.97978	0.999887	0	0	0.250007	0.00510684	MTOR
VEGFA in Neovascular Glaucoma	1/39	0.97978	0.999887	0	0	0.250007	0.00510684	PTGS2
CD38/CD19 -> JUN/FOS/NF-kB Signaling in B-cell Proliferation	1/39	0.97978	0.999887	0	0	0.250007	0.00510684	LAT
Prostate Cancer	6/123	0.980412	0.999887	0	0	0.486341	0.00962079	AR;CEBPA;CDKN2B;BCL2L11;BCL2;PTGS2
Ca2+ Flux Regulation	5/109	0.981632	0.999887	0	0	0.456034	0.00845437	P2RX7;P2RY11;P2RX1;HTR2B;ADRA2C
Dendritic Spine Morphogenesis and Stabilization	1/40	0.981707	0.999887	0	0	0.243583	0.00449716	GKAP1
G0/G1 Phase Transition	1/40	0.981707	0.999887	0	0	0.243583	0.00449716	RELA
Interstitial Fibroblasts in Pyelonephritis	1/40	0.981707	0.999887	0	0	0.243583	0.00449716	PDGFC
Glycolysis Activation in Cancer (Warburg Effect)	1/40	0.981707	0.999887	0	0	0.243583	0.00449716	RELA
B-Cell Chronic Lymphocytic Leukemia	4/94	0.982306	0.999887	0	0	0.421684	0.00752789	BCL2;ATM;TLR6;MTOR
Natural Killer Cell Precursor -> Natural Killer Cell Surface Expression Markers	3/78	0.982697	0.999887	0	0	0.379631	0.00662609	CD274;TNFRSF14;CD55
AXL Receptor Inhibits Macrophages and Dendritic Cells Function	1/41	0.98345	0.999887	0	0	0.23748	0.00396324	PROS1
Club-Cell Role in Asthma	1/41	0.98345	0.999887	0	0	0.23748	0.00396324	CEBPA
Peripheral Tolerance to Autoantigens Recession in Diabetes Mellitus Type 1	1/41	0.98345	0.999887	0	0	0.23748	0.00396324	LAT
Th17-Cell Activation in Crohn's Disease	1/41	0.98345	0.999887	0	0	0.23748	0.00396324	LAT
RAS/RAF/MAPK Signaling Activation by Blocking of Tumor Suppressors	1/41	0.98345	0.999887	0	0	0.23748	0.00396324	RALA
EGFR/ERBB2 -> TP53 Signaling	1/41	0.98345	0.999887	0	0	0.23748	0.00396324	NRG1
T-Cell Receptor -> NF-kB Signaling	1/41	0.98345	0.999887	0	0	0.23748	0.00396324	LAT
Serotonin Receptors Signaling	1/42	0.985027	0.999887	0	0	0.231675	0.00349517	HTR2B
Acute Phase in Atopic Dermatitis	1/42	0.985027	0.999887	0	0	0.231675	0.00349517	TSLP
Airway Smooth Muscle Cell Contraction	1/42	0.985027	0.999887	0	0	0.231675	0.00349517	ARHGEF1
Hippo/YAP1 Signaling Deregulation in Cancer	1/42	0.985027	0.999887	0	0	0.231675	0.00349517	DCAF1
EGFR -> AP-1/ATF2 Signaling	1/42	0.985027	0.999887	0	0	0.231675	0.00349517	NRG1
Proteins Involved in Hypothyroidism	2/63	0.986044	0.999887	0	0	0.311251	0.00437433	PAX8;APOA4
MicroRNAs Role in Melanoma	1/43	0.986453	0.999887	0	0	0.226147	0.00308445	BCL2L11
Proteins Involved in Atopic Dermatitis	1/43	0.986453	0.999887	0	0	0.226147	0.00308445	TSLP
T-Cell Cytotoxic Activation	1/43	0.986453	0.999887	0	0	0.226147	0.00308445	TLR6
WNT Signaling in Cystic Kidney Disease	1/43	0.986453	0.999887	0	0	0.226147	0.00308445	FZD5
VEGFR -> AP-1/CREB/MYC Signaling	1/43	0.986453	0.999887	0	0	0.226147	0.00308445	RPS6KA5
Myeloblast -> Neutrophil Surface Expression Markers	2/64	0.987201	0.999887	0	0	0.306214	0.00394464	CD274;C5AR1
Proteins Involved in Neuroblastoma	12/216	0.987635	0.999887	0	0	0.556925	0.00692925	BMP2;CRABP2;TH;HSPA5;RIOX2;BCL2;PPARG;TNFRSF10A;TRIM16;FGF2;ATF3;MTOR
Translation	1/44	0.987744	0.999887	0	0	0.220875	0.00272371	FARSA
CagA Phosphorylation Independent Signaling	1/44	0.987744	0.999887	0	0	0.220875	0.00272371	CXCL8
T-Cells Differentiation Block in Psoriasis	1/44	0.987744	0.999887	0	0	0.220875	0.00272371	PTGS2
Treg Cells Promote Immunosuppression in Cancer Immune Escape	1/44	0.987744	0.999887	0	0	0.220875	0.00272371	LAT
Proteins Involved in Glaucoma	3/84	0.989182	0.999887	0	0	0.351394	0.0038221	CYLD;WDR36;CYP1B1
Platelet Activation via Adhesion Molecules	2/66	0.98924	0.999887	0	0	0.296612	0.00320887	CXCL8;LAT
Toll-like Receptor Independent Sterile Inflammation	2/66	0.98924	0.999887	0	0	0.296612	0.00320887	P2RX7;CXCL2
Dendritic Cell Function in Ulcerative Colitis	1/46	0.989969	0.999887	0	0	0.211035	0.00212764	NOD2
Ras-GAP Regulation Signaling	1/46	0.989969	0.999887	0	0	0.211035	0.00212764	SPRED2
Vascular Motility	3/85	0.990005	0.999887	0	0	0.347089	0.00348673	ADORA2B;ARHGEF1;ADRA2C
Skin Fibrosis	2/67	0.990137	0.999887	0	0	0.292032	0.00289465	MMP1;PDGFC
Immune System Activation in Hyperthyroidism	1/47	0.990925	0.999887	0	0	0.206436	0.00188203	LAT
FibronectinR -> AP-1/ELK/SRF/SREBF Signaling	1/47	0.990925	0.999887	0	0	0.206436	0.00188203	SREBF1
Plasmin Effects in Inflammation	2/68	0.990961	0.999887	0	0	0.287592	0.00261145	MMP1;F12
T-Cell Cytotoxic Response in Ulcerative Colitis	1/48	0.99179	0.999887	0	0	0.202033	0.00166563	LAT
CC Chemokine Receptor Signaling	3/88	0.992126	0.999887	0	0	0.334783	0.00264639	CCL28;CCR10;CCL26
Smooth Muscle Cell Dysfunction in Pulmonary Hypertension	3/88	0.992126	0.999887	0	0	0.334783	0.00264639	JAG2;HTR2B;BCL2
Mast-Cell Activation without Degranulation	1/49	0.992572	0.999887	0	0	0.197813	0.00147484	CXCL8
Platelet Activation via GPCR Signaling	1/49	0.992572	0.999887	0	0	0.197813	0.00147484	F2RL3
Goblet-Cell Related Mucus Secretion in Asthma	1/49	0.992572	0.999887	0	0	0.197813	0.00147484	PTGS2
Mesangial Cell Dysfunction in Diabetic Nephropathy	1/49	0.992572	0.999887	0	0	0.197813	0.00147484	MTOR
CDH2 Activation Promotes Cancer Cell Migration and Survival	1/49	0.992572	0.999887	0	0	0.197813	0.00147484	FGF2
Cell Cycle Overiew	4/107	0.993169	0.999887	0	0	0.368195	0.00252361	CDKN2B;ESPL1;ATM;ATR
Neutrophil Activation via FCGR3B	1/50	0.99328	0.999887	0	0	0.193765	0.00130652	LAT
Potassium Flux Regulation	1/50	0.99328	0.999887	0	0	0.193765	0.00130652	KCNJ14
non-Suppressive Treg-Cell in Diabetes Mellitus Type 1	1/50	0.99328	0.999887	0	0	0.193765	0.00130652	LAT
Plasmin Role in Glomerulonephritis	1/50	0.99328	0.999887	0	0	0.193765	0.00130652	F12
Smooth Muscle Cell Dysfunction in Arterial Hypertension	1/50	0.99328	0.999887	0	0	0.193765	0.00130652	MTOR
Th17-Cell Function in Systemic Lupus Erythematosus	1/50	0.99328	0.999887	0	0	0.193765	0.00130652	LAT
Alveolar Macrophages Dysfunction in COPD	2/72	0.993633	0.999887	0	0	0.271098	0.00173148	P2RX7;CXCL8
Natural Killer Cell Inhibitory Receptor Signaling	1/51	0.99392	0.999887	0	0	0.189879	0.00115793	LAT
Inflammatory Reaction in Acne Vulgaris	1/51	0.99392	0.999887	0	0	0.189879	0.00115793	CXCL8
Acute Cytotoxic CD8+T-Cell Response against Melanocytes	1/52	0.9945	0.999887	0	0	0.186146	0.00102668	LAT
Polycystic Ovary Syndrome	1/52	0.9945	0.999887	0	0	0.186146	0.00102668	AR
EGFR Signaling	1/52	0.9945	0.999887	0	0	0.186146	0.00102668	MTOR
Nociception Expression Targets Signaling	6/143	0.994721	0.999887	0	0	0.41488	0.00219608	RPS6KA5;CXCL8;P2RY11;MMP1;PTGS2;CAMKK1
CXC Chemokine Receptor Signaling	2/75	0.995113	0.999887	0	0	0.259913	0.00127329	CXCL8;CXCL2
Invadopodia Formation in Cancer Cells	2/75	0.995113	0.999887	0	0	0.259913	0.00127329	GOLGA2;AKAP9
T-Cell Receptor Signaling	1/54	0.995498	0.999887	0	0	0.179101	0.000808111	LAT
Atopic Dermatitis Onset	1/54	0.995498	0.999887	0	0	0.179101	0.000808111	LAT
Mucin Hyperproduction in Goblet and Mucous Cells	1/54	0.995498	0.999887	0	0	0.179101	0.000808111	ADAM17
beta-Cell Destruction in Diabetes Mellitus Type 1	1/55	0.995927	0.999887	0	0	0.175775	0.000717364	CYCS
Hepatic Stellate Cells in non-Alcoholic Fatty Liver Disease	1/55	0.995927	0.999887	0	0	0.175775	0.000717364	CXCL8
TLR4 Signaling in Leukocytes	1/56	0.996315	0.999887	0	0	0.172569	0.00063704	CXCL8
Th2-Cell Differentiation	1/57	0.996666	0.999887	0	0	0.169478	0.000565909	LAT
Th2-Cell Function in Ulcerative Colitis	1/57	0.996666	0.999887	0	0	0.169478	0.000565909	LAT
Th2-Cell Response in Asthma	1/57	0.996666	0.999887	0	0	0.169478	0.000565909	LAT
Treg-Cell Activation in Diabetes Mellitus	1/57	0.996666	0.999887	0	0	0.169478	0.000565909	LAT
Proteins Involved in Dilated Cardiomyopathy	7/167	0.996977	0.999887	0	0	0.414136	0.00125368	ACE;MMP1;PDGFC;HTR2B;NRG1;PPARG;MTOR
Treg-Cell Differentiation	1/58	0.996984	0.999887	0	0	0.166496	0.000502891	LAT
CD4+ T-Cell Function Decline in HIV	1/58	0.996984	0.999887	0	0	0.166496	0.000502891	LAT
Atopic Dermatitis	2/81	0.997131	0.999887	0	0	0.240093	0.000689757	TSLP;PKP4
Positive Acute Phase Proteins Synthesis	1/59	0.997271	0.999887	0	0	0.163616	0.000447037	PPARA
Antigen-Presenting Cell Role in Asthma	1/59	0.997271	0.999887	0	0	0.163616	0.000447037	TLR6
Osteoarthritis	2/82	0.997376	0.999887	0	0	0.237079	0.000622888	MMP1;COL10A1
Toll-like Receptors in Sterile Inflammation	1/60	0.997531	0.999887	0	0	0.160834	0.000397513	CXCL8
Th2-Cells Function in Systemic Scleroderma	1/60	0.997531	0.999887	0	0	0.160834	0.000397513	LAT
CD8+ T-Cell Activation	1/62	0.997979	0.999887	0	0	0.155544	0.000314601	LAT
Neutrophil Degranulation via FPR1 Signaling	1/62	0.997979	0.999887	0	0	0.155544	0.000314601	CXCL8
Treg-Cell Function in Diabetes Mellitus Type 1	1/62	0.997979	0.999887	0	0	0.155544	0.000314601	LAT
Natural Killer Cell Activation through ITAM-Containing Receptors	1/63	0.998172	0.999887	0	0	0.153026	0.000279998	LAT
T-Cell Dependent B-Cell Activation	1/63	0.998172	0.999887	0	0	0.153026	0.000279998	LAT
Th17-Cell Differentiation	1/63	0.998172	0.999887	0	0	0.153026	0.000279998	LAT
TLR2 Signaling in Treg-Cell in Type 1 Diabetes (Animal Model)	1/63	0.998172	0.999887	0	0	0.153026	0.000279998	LAT
anti-Inflammatory Function of Macrophage M2 Lineage	1/64	0.998346	0.999887	0	0	0.150589	0.00024927	KDM6B
Th1-Cell Differentiation	1/64	0.998346	0.999887	0	0	0.150589	0.00024927	LAT
B-Cell Activation in Systemic Lupus Erythematosus	1/65	0.998504	0.999887	0	0	0.148228	0.000221976	BIRC3
Cardiomyocyte Hypertrophy	1/65	0.998504	0.999887	0	0	0.148228	0.000221976	MTOR
HPV Infection and Cancer	1/65	0.998504	0.999887	0	0	0.148228	0.000221976	BCL2
Natural Killer T-Cell Roles in Diabetes Mellitus Type 1	1/65	0.998504	0.999887	0	0	0.148228	0.000221976	LAT
Th17-Cell Differentiation in Asthma	1/65	0.998504	0.999887	0	0	0.148228	0.000221976	LAT
Hypertrophic Cardiomyopathy	2/89	0.998599	0.999887	0	0	0.217919	0.000305504	MYOZ2;MTOR
Vascular Endothelial Cell Activation by Cytokines	1/66	0.998646	0.999887	0	0	0.145939	0.000197722	PROS1
Th17-Cell and Th1 Immune Responsein Psoriatic Arthritis	1/66	0.998646	0.999887	0	0	0.145939	0.000197722	LAT
T-Cell Cytotoxic Response against Melanocytes in Vitiligo	2/90	0.99872	0.999887	0	0	0.215431	0.000275996	CXCL8;LAT
CD16/CD14 Proinflammatory Monocyte Activation	1/67	0.998775	0.999887	0	0	0.14372	0.000176165	LAT
B-Cells Function in Systemic Scleroderma	1/69	0.998997	0.999887	0	0	0.139478	0.000139951	LAT
Cytokines Trigger Otitis Media	1/71	0.999179	0.999887	0	0	0.135478	0.000111292	CXCL8
Humoral Immunity in Vitiligo	1/71	0.999179	0.999887	0	0	0.135478	0.000111292	LAT
Lymphocyte Mediated Myocardial Injury in Myocarditis	1/72	0.999257	0.999887	0	0	0.133562	9.92806e-05	LAT
Th1-Cells Activation and Proliferation in Atherosclerosis	1/72	0.999257	0.999887	0	0	0.133562	9.92806e-05	LAT
Proteins Involved in HIV Type 1 Infection	1/88	0.999848	0.999887	0	0	0.108902	1.65158e-05	P4HB
CD4+T-Cell Response in Celiac Disease	1/91	0.999887	0.999887	0	0	0.105255	1.18979e-05	LAT

## Sheet: UP_KEGG
Term	Overlap	P-value	Adjusted P-value	Old P-value	Old Adjusted P-value	Odds Ratio	Combined Score	Genes
Terpenoid backbone biosynthesis	9/22	9.83915e-05	0.0302062	0	0	6.61404	61.0248	FDPS;IDI1;NUS1;HMGCS1;PMVK;MVD;HMGCR;ACAT1;DHDDS
Protein processing in endoplasmic reticulum	30/171	0.000732187	0.10981	0	0	2.04094	14.7345	PPP1R15A;SAR1B;DERL3;DERL1;HERPUD1;DNAJB2;ERLEC1;UBXN8;MAN1C1;FBXO6;SEC23B;SEC63;SEC24A;HSPA5;EDEM1;EIF2AK3;SYVN1;MOGS;ERN1;DNAJC3;DNAJC1;SELENOS;DDIT3;DNAJC10;BCL2;STT3A;HYOU1;P4HB;ATF6;HSPA1B
Ferroptosis	11/41	0.00119938	0.10981	0	0	3.5034	23.5637	PRNP;MAP1LC3B;TFRC;ACSL1;FTH1;SLC11A2;MAP1LC3B2;HMOX1;SLC39A8;SLC7A11;FTL
Amino sugar and nucleotide sugar metabolism	12/48	0.00143074	0.10981	0	0	3.18554	20.8639	NANP;GALE;GNPDA1;NAGK;AMDHD2;HKDC1;UAP1L1;GFPT1;PGM3;UAP1;RENBP;GNE
Mineral absorption	12/60	0.00992597	0.609455	0	0	2.38757	11.0129	SLC46A1;MT2A;MT1A;SLC31A1;FTH1;SLC11A2;MT1F;MT1G;HMOX1;MT1X;ATP7A;FTL
Phosphonate and phosphinate metabolism	3/6	0.0137781	0.704981	0	0	9.5287	40.8274	PCYT2;CEPT1;SELENOI
Protein export	6/23	0.0179636	0.787833	0	0	3.36579	13.5285	HSPA5;SRP54;SRPRA;SRPRB;SEC11C;SEC63
Fatty acid biosynthesis	5/18	0.0231297	0.887603	0	0	3.66672	13.8112	OLAH;ACSL1;FASN;HTD2;ACACA
SNARE interactions in vesicular transport	7/33	0.0328225	0.97323	0	0	2.56757	8.77245	GOSR2;GOSR1;BNIP1;STX3;SEC22B;VAMP4;YKT6
Steroid biosynthesis	5/20	0.0357186	0.97323	0	0	3.17747	10.5876	CYP27B1;SQLE;CYP2R1;DHCR7;HSD17B7
NF-kappa B signaling pathway	16/104	0.0365447	0.97323	0	0	1.73624	5.74559	CXCL8;CSNK2A1;CSNK2A3;LY96;XIAP;PTGS2;CXCL2;EDA2R;RELA;NFKB2;CYLD;BCL2;ATM;CARD14;LAT;BIRC3
Biosynthesis of unsaturated fatty acids	6/27	0.0380416	0.97323	0	0	2.72408	8.90523	FADS2;ELOVL5;ACOX1;SCD;ELOVL6;FADS1
PPAR signaling pathway	12/74	0.0458065	0.999996	0	0	1.847	5.69492	FADS2;FABP3;HMGCS1;GK;ACSL1;MMP1;ACOX1;SCD;OLR1;PLIN2;PPARG;PPARA
Ribosome biogenesis in eukaryotes	16/108	0.0491859	0.999996	0	0	1.66038	5.00131	RBM28;WDR36;NOP58;UTP6;NXT1;CSNK2A1;CSNK2A3;EFL1;IMP4;GNL2;UTP18;WDR43;GNL3;NOL6;EMG1;GAR1
Lysosome	18/128	0.0594737	0.999996	0	0	1.56236	4.40933	ATP6V0B;ENTPD4;FUCA1;SLC11A2;AP3D1;CTNS;MCOLN1;AP4B1;MFSD8;NPC1;HYAL1;LAMP3;NEU1;HYAL3;SLC17A5;ACP5;TPP1;CD68
Herpes simplex virus 1 infection	58/498	0.0614269	0.999996	0	0	1.26228	3.52165	ZNF331;ZNF573;ZNF891;ZNF81;ZNF805;ZNF529;ZNF605;ZNF84;ZNF527;ZNF404;ZNF888;ZNF568;ZNF566;ZNF841;ZFP37;ZNF565;ZNF560;ZFP69B;ZNF10;TSC1;ZNF57;ZNF717;ZNF879;ZNF557;ZNF432;ZNF398;BIRC3;ZNF275;ZNF550;ZNF791;ZNF471;ZNF8;RELA;ZNF829;ZNF749;ZNF229;TNFRSF14;ZNF347;ZNF587;ZNF785;ZNF582;ZNF141;ZNF460;ZNF140;ZNF181;EIF2AK3;PILRB;MTOR;ZNF33A;ZNF616;ZNF417;HLA-DPB1;BCL2;ZNF658;CYCS;ZNF578;ZNF577;ZNF530
Synthesis and degradation of ketone bodies	3/10	0.0619616	0.999996	0	0	4.08283	11.3553	HMGCS1;OXCT1;ACAT1
Small cell lung cancer	13/92	0.0953904	0.999996	0	0	1.56969	3.68843	CDKN2B;LAMA1;MAX;XIAP;PTGS2;RELA;COL4A4;COL4A3;CKS2;BCL2;CYCS;BIRC7;BIRC3
Vitamin B6 metabolism	2/6	0.104729	0.999996	0	0	4.76158	10.7439	PDXK;PHOSPHO2
One carbon pool by folate	4/20	0.115794	0.999996	0	0	2.38172	5.13484	ALDH1L1;MTHFD2L;MTHFR;MTR
Glycerolipid metabolism	9/61	0.121839	0.999996	0	0	1.64995	3.47323	AGPAT5;PLPP5;DGAT2;GK;GLYCTK;AKR1A1;GPAT3;LPIN1;DGKI
Alanine, aspartate and glutamate metabolism	6/37	0.134533	0.999996	0	0	1.84432	3.69961	GOT1;PPAT;GPT2;GFPT1;NAT8L;ASS1
Arginine biosynthesis	4/22	0.150849	0.999996	0	0	2.11685	4.00397	ARG2;GOT1;GPT2;ASS1
Glyoxylate and dicarboxylate metabolism	5/30	0.151059	0.999996	0	0	1.90543	3.60143	MCEE;MDH1;GLYCTK;MMUT;ACAT1
Legionellosis	8/57	0.170735	0.999996	0	0	1.55585	2.75018	CXCL8;SAR1B;CYCS;SEC22B;CXCL2;RELA;HSPA1B;NFKB2
Glycine, serine and threonine metabolism	6/40	0.17568	0.999996	0	0	1.68131	2.92396	DMGDH;ALAS1;GLYCTK;CTH;PGAM2;GCAT
Apoptosis	17/142	0.191861	0.999996	0	0	1.29673	2.14087	HRK;PARP3;EIF2AK3;XIAP;CSF2RB;TNFRSF10A;TUBA4A;RELA;ERN1;BCL2L11;DDIT3;BCL2;CYCS;ATM;BIRC6;BIRC7;BIRC3
N-Glycan biosynthesis	7/50	0.193797	0.999996	0	0	1.55102	2.54514	DPAGT1;ALG2;MAN1C1;STT3A;ALG3;MOGS;ALG11
Base excision repair	5/33	0.20045	0.999996	0	0	1.70099	2.73382	MBD4;FEN1;PARP3;LIG1;POLE3
Propanoate metabolism	5/34	0.218005	0.999996	0	0	1.64225	2.50153	MCEE;ACOX1;MMUT;ACACA;ACAT1
Nicotinate and nicotinamide metabolism	5/35	0.236011	0.999996	0	0	1.58742	2.29204	NADK2;NMRK1;QPRT;NAMPT;NT5M
Lysine degradation	8/63	0.247357	0.999996	0	0	1.38566	1.93566	HYKK;KMT2A;KMT5C;KMT2C;SETD7;SETDB2;DHTKD1;ACAT1
AMPK signaling pathway	14/120	0.249579	0.999996	0	0	1.25863	1.74696	PFKFB2;SREBF1;IRS2;TSC1;HMGCR;PRKAB1;ACACA;MTOR;LIPE;CREB3;SCD;FASN;AKT1S1;PPARG
Longevity regulating pathway	12/102	0.261888	0.999996	0	0	1.27041	1.70214	CREB3;CLPB;ATG101;AKT1S1;IRS2;TSC1;PPARG;PRKAB1;ADCY7;RELA;MTOR;HSPA1B
Pyruvate metabolism	6/47	0.286989	0.999996	0	0	1.39372	1.73979	MDH1;LDHD;AKR1A1;HAGH;ACACA;ACAT1
Various types of N-glycan biosynthesis	5/39	0.311367	0.999996	0	0	1.40035	1.63391	MAN1C1;ALG2;STT3A;ALG3;ALG11
Mitophagy	8/68	0.318115	0.999996	0	0	1.26983	1.4544	CSNK2A1;CSNK2A3;EIF2AK3;PGAM5;TBC1D17;SQSTM1;RELA;TBC1D15
Insulin signaling pathway	15/137	0.322231	0.999996	0	0	1.17126	1.32643	SREBF1;CBLB;IRS2;PHKA1;TSC1;PRKAB1;ACACA;MTOR;LIPE;PPP1R3F;PPP1R3E;FASN;HKDC1;PHKG2;SH2B2
Epithelial cell signaling in Helicobacter pylori infection	8/70	0.347479	0.999996	0	0	1.22874	1.29884	ATP6V0B;ADAM17;CXCL8;ATP6V0E2;CXCL2;RELA;ATP6V1C1;MAPK13
Homologous recombination	5/41	0.350241	0.999996	0	0	1.32241	1.38738	RAD50;TOP3A;RPA2;ATM;BRCA2
Non-homologous end-joining	2/13	0.354564	0.999996	0	0	1.73081	1.79462	FEN1;RAD50
Mismatch repair	3/23	0.376263	0.999996	0	0	1.42796	1.39579	LIG1;RPA2;MLH1
Renin-angiotensin system	3/23	0.376263	0.999996	0	0	1.42796	1.39579	NLN;ACE;MME
Toxoplasmosis	12/112	0.376791	0.999996	0	0	1.14273	1.11538	LAMA1;BCL2;HLA-DPB1;LY96;CYCS;XIAP;BIRC7;RELA;HSPA1B;NFKBIB;BIRC3;MAPK13
Neomycin, kanamycin and gentamicin biosynthesis	1/5	0.393291	0.999996	0	0	2.37954	2.2206	HKDC1
Vitamin digestion and absorption	3/24	0.402965	0.999996	0	0	1.35989	1.23601	SLC46A1;APOA4;SLC19A2
Non-alcoholic fatty liver disease	16/155	0.403752	0.999996	0	0	1.09609	0.994101	SREBF1;CEBPA;CXCL8;EIF2AK3;IRS2;PRKAB1;RELA;MAPK13;ERN1;BCL2L11;DDIT3;CYCS;NDUFS1;PPARG;NDUFV3;PPARA
Fanconi anemia pathway	6/54	0.408865	0.999996	0	0	1.19001	1.06431	TOP3A;RPA2;BRCA2;MLH1;FAN1;ATR
Basal transcription factors	5/45	0.428257	0.999996	0	0	1.18991	1.00908	TAF13;TAF9;TAF4B;TAF5;GTF2F1
Autophagy	14/137	0.430153	0.999996	0	0	1.08365	0.914186	EIF2AK3;RAB39B;IRS2;TSC1;MTOR;ERN1;RRAGC;ATG16L2;ATG101;RRAGD;AKT1S1;BCL2;SMCR8;SQSTM1
Phosphatidylinositol signaling system	10/97	0.443617	0.999996	0	0	1.0942	0.88936	IPPK;PIKFYVE;PIP4P1;SYNJ1;PPIP5K2;BPNT2;PIK3C2A;DGKI;PI4K2A;IP6K3
Phenylalanine, tyrosine and tryptophan biosynthesis	1/6	0.451003	0.999996	0	0	1.90352	1.51574	GOT1
DNA replication	4/36	0.451424	0.999996	0	0	1.18981	0.94631	FEN1;LIG1;POLE3;RPA2
Mucin type O-glycan biosynthesis	4/36	0.451424	0.999996	0	0	1.18981	0.94631	GALNT12;GALNT3;C1GALT1;GCNT3
Folate biosynthesis	3/26	0.455253	0.999996	0	0	1.2415	0.976938	TH;MOCOS;PCBD2
Glycosylphosphatidylinositol (GPI)-anchor biosynthesis	3/26	0.455253	0.999996	0	0	1.2415	0.976938	PIGA;PIGL;PIGH
Glycerophospholipid metabolism	10/98	0.456764	0.999996	0	0	1.08171	0.847614	AGPAT5;PLPP5;PCYT2;CHKA;LPCAT1;GPAT3;CEPT1;LPIN1;DGKI;SELENOI
Other types of O-glycan biosynthesis	5/47	0.466655	0.999996	0	0	1.13312	0.863623	GALNT12;POMT2;GALNT3;C1GALT1;GXYLT1
RNA degradation	8/79	0.481103	0.999996	0	0	1.07245	0.784679	HSPA9;ZCCHC7;CNOT6L;DIS3;CNOT10;SKIV2L;CNOT9;EDC3
Lipid and atherosclerosis	21/215	0.482631	0.999996	0	0	1.03034	0.750603	CXCL8;HSPA5;MMP1;EIF2AK3;MIB2;LY96;TNFRSF10A;APOA4;CXCL2;RELA;MAPK13;ERN1;DDIT3;BCL2;OLR1;CYCS;ARHGEF1;PPARG;TLR6;ATF6;HSPA1B
Valine, leucine and isoleucine degradation	5/48	0.48556	0.999996	0	0	1.1067	0.799542	MCEE;HMGCS1;OXCT1;MMUT;ACAT1
Adipocytokine signaling pathway	7/69	0.487716	0.999996	0	0	1.07458	0.77157	ACSL1;IRS2;PPARA;PRKAB1;RELA;MTOR;NFKBIB
Selenocompound metabolism	2/17	0.490409	0.999996	0	0	1.26898	0.904171	CTH;MTR
Butanoate metabolism	3/28	0.505514	0.999996	0	0	1.14205	0.779085	HMGCS1;OXCT1;ACAT1
Other glycan degradation	2/18	0.521499	0.999996	0	0	1.18961	0.774489	FUCA1;NEU1
Cysteine and methionine metabolism	5/50	0.522612	0.999996	0	0	1.0574	0.686164	AHCYL2;GOT1;MDH1;CTH;MTR
Riboflavin metabolism	1/8	0.550488	0.999996	0	0	1.35951	0.81156	ACP5
Glycosaminoglycan degradation	2/19	0.551289	0.999996	0	0	1.11957	0.666697	HYAL1;HYAL3
Parathyroid hormone synthesis, secretion and action	10/106	0.559203	0.999996	0	0	0.991125	0.576084	NR4A2;CYP27B1;CREB3;MMP16;MMP15;PDE4D;BCL2;ARHGEF1;ADCY7;PTHLH
Transcriptional misregulation in cancer	18/192	0.56182	0.999996	0	0	0.984186	0.567456	CEBPA;CXCL8;CCNT1;KMT2A;MAX;ETV1;ETV4;RELA;BAIAP3;NR4A3;PAX8;DDIT3;REL;COMMD3-BMI1;ATM;PPARG;NUPR1;BIRC3
Insulin resistance	10/108	0.583638	0.999996	0	0	0.97079	0.522746	SREBF1;CREB3;PPP1R3E;GFPT1;IRS2;TRIB3;PPARA;PRKAB1;RELA;MTOR
Fructose and mannose metabolism	3/33	0.619434	0.999996	0	0	0.951448	0.455695	PFKFB2;ENOSF1;HKDC1
PD-L1 expression and PD-1 checkpoint pathway in cancer	8/89	0.619732	0.999996	0	0	0.939523	0.449532	CD274;CSNK2A1;CSNK2A3;RELA;MTOR;LAT;MAPK13;NFKBIB
Pyrimidine metabolism	5/56	0.625821	0.999996	0	0	0.93269	0.437144	ENTPD4;NME7;NT5M;UPP1;AK9
TNF signaling pathway	10/112	0.630575	0.999996	0	0	0.932513	0.430004	CREB3;RPS6KA5;LIF;PGAM5;NOD2;PTGS2;CXCL2;RELA;BIRC3;MAPK13
ABC transporters	4/45	0.63101	0.999996	0	0	0.928166	0.427359	ABCC4;ABCA3;ABCB8;ABCA7
Sulfur metabolism	1/10	0.631952	0.999996	0	0	1.05728	0.485229	BPNT2
Nucleotide excision repair	4/47	0.665397	0.999996	0	0	0.884897	0.360481	LIG1;POLE3;RPA2;ERCC5
RIG-I-like receptor signaling pathway	6/70	0.665409	0.999996	0	0	0.891713	0.363242	CYLD;SIKE1;CXCL8;RELA;MAPK13;NFKBIB
Taurine and hypotaurine metabolism	1/11	0.666971	0.999996	0	0	0.951499	0.385365	GGT1
Ubiquinone and other terpenoid-quinone biosynthesis	1/11	0.666971	0.999996	0	0	0.951499	0.385365	GGCX
Rheumatoid arthritis	8/93	0.6693	0.999996	0	0	0.895111	0.359407	ATP6V0B;CXCL8;MMP1;HLA-DPB1;ACP5;ATP6V0E2;CXCL2;ATP6V1C1
Peroxisome	7/82	0.67341	0.999996	0	0	0.887676	0.350988	PHYH;PRDX5;ACSL1;ACOX1;IDH1;MPV17L;PMVK
Tyrosine metabolism	3/36	0.678611	0.999996	0	0	0.864809	0.335293	FAHD1;GOT1;TH
Adherens junction	6/71	0.67895	0.999996	0	0	0.877945	0.339947	AFDN;PTPRB;CSNK2A1;CSNK2A3;TCF7;SSX2IP
Ubiquitin mediated proteolysis	12/140	0.689917	0.999996	0	0	0.891369	0.330862	HERC1;FBXW8;UBA6;NEDD4;HUWE1;SYVN1;XIAP;CBLB;BIRC6;BIRC7;ANAPC10;BIRC3
Purine metabolism	11/129	0.692356	0.999996	0	0	0.886357	0.325874	NUDT9;ENTPD4;NME7;PPAT;PDE4D;ADK;NT5M;PDE8A;ADCY7;HDDC3;AK9
Thyroid cancer	3/37	0.69675	0.999996	0	0	0.839327	0.303273	PAX8;TCF7;PPARG
Cocaine addiction	4/49	0.697526	0.999996	0	0	0.845475	0.304553	CREB3;TH;FOSB;RELA
alpha-Linolenic acid metabolism	2/25	0.701915	0.999996	0	0	0.827231	0.292792	FADS2;ACOX1
Inositol phosphate metabolism	6/73	0.704947	0.999996	0	0	0.851644	0.297762	IPPK;PIKFYVE;SYNJ1;INPP5J;PIK3C2A;PI4K2A
Amyotrophic lateral sclerosis	32/364	0.707341	0.999996	0	0	0.915714	0.317059	PSMD12;TOMM40;NXT1;DNAH2;DERL1;HDAC6;ATP5MC1;KLC4;ATG101;NDUFV3;PRPH;NDC1;RANBP2;DNAH12;HSPA5;EIF2AK3;RAB39B;NRG1;TUBA4A;MTOR;MAPK13;ERN1;PSMC4;DDIT3;BCL2;CYCS;ANG;NDUFS1;SMCR8;ATF6;SQSTM1;NUP58
Arginine and proline metabolism	4/50	0.712736	0.999996	0	0	0.827049	0.280075	ARG2;GOT1;CNDP2;AGMAT
Vibrio cholerae infection	4/50	0.712736	0.999996	0	0	0.827049	0.280075	ATP6V0B;KDELR3;ATP6V0E2;ATP6V1C1
mTOR signaling pathway	13/154	0.714667	0.999996	0	0	0.876448	0.294432	FZD5;NPRL2;TSC1;CASTOR1;WDR24;MTOR;RRAGC;RRAGD;AKT1S1;FNIP1;LPIN1;LAMTOR3;ATP6V1C1
Colorectal cancer	7/86	0.721215	0.999996	0	0	0.842544	0.275358	RALA;BCL2L11;TCF7;BCL2;CYCS;MLH1;MTOR
Ovarian steroidogenesis	4/51	0.727377	0.999996	0	0	0.809407	0.257642	CYP1B1;HSD17B7;PTGS2;ADCY7
Collecting duct acid secretion	2/27	0.741814	0.999996	0	0	0.760968	0.227268	ATP6V0E2;ATP6V1C1
Fatty acid elongation	2/27	0.741814	0.999996	0	0	0.760968	0.227268	ELOVL5;ELOVL6
Viral protein interaction with cytokine and cytokine receptor	8/100	0.746001	0.999996	0	0	0.826684	0.242242	CXCL8;IL20RB;TNFRSF14;TNFRSF10A;CXCL2;CCL28;CCR10;CCL26
Bladder cancer	3/41	0.761538	0.999996	0	0	0.750811	0.204532	CXCL8;RPS6KA5;MMP1
Synaptic vesicle cycle	6/78	0.763513	0.999996	0	0	0.792282	0.213777	NAPA;ATP6V0B;UNC13A;STX3;ATP6V0E2;ATP6V1C1
Amoebiasis	8/102	0.765463	0.999996	0	0	0.809005	0.216227	ARG2;GNAL;CXCL8;LAMA1;COL4A4;COL4A3;CXCL2;RELA
Tryptophan metabolism	3/42	0.77586	0.999996	0	0	0.731519	0.185647	CYP1B1;ACAT1;DHTKD1
Thiamine metabolism	1/15	0.776761	0.999996	0	0	0.679492	0.171655	TPK1
Osteoclast differentiation	10/127	0.778318	0.999996	0	0	0.812282	0.203575	CYLD;ACP5;FOSB;PPARG;GAB2;SQSTM1;RELA;OSCAR;NFKB2;MAPK13
Regulation of lipolysis in adipocytes	4/55	0.780356	0.999996	0	0	0.745759	0.184952	LIPE;IRS2;PTGS2;ADCY7
Fat digestion and absorption	3/43	0.789467	0.999996	0	0	0.713191	0.168596	DGAT2;APOA4;ACAT1
Fatty acid degradation	3/43	0.789467	0.999996	0	0	0.713191	0.168596	ACSL1;ACOX1;ACAT1
Porphyrin and chlorophyll metabolism	3/43	0.789467	0.999996	0	0	0.713191	0.168596	ALAS1;HMOX1;PPOX
Citrate cycle (TCA cycle)	2/30	0.793033	0.999996	0	0	0.679323	0.157528	MDH1;IDH1
Pentose phosphate pathway	2/30	0.793033	0.999996	0	0	0.679323	0.157528	GLYCTK;RBKS
beta-Alanine metabolism	2/30	0.793033	0.999996	0	0	0.679323	0.157528	ACOX1;CNDP2
IL-17 signaling pathway	7/94	0.801838	0.999996	0	0	0.764729	0.168889	CXCL8;MMP1;FOSB;PTGS2;CXCL2;RELA;MAPK13
Galactose metabolism	2/31	0.807997	0.999996	0	0	0.655862	0.139828	GALE;HKDC1
RNA polymerase	2/31	0.807997	0.999996	0	0	0.655862	0.139828	POLR1B;POLR3E
Neurotrophin signaling pathway	9/119	0.809107	0.999996	0	0	0.777467	0.164686	ZNF274;RPS6KA5;IRAK2;BCL2;IRAK3;RELA;SH2B2;NFKBIB;MAPK13
Signaling pathways regulating pluripotency of stem cells	11/143	0.810404	0.999996	0	0	0.791733	0.16644	FZD5;TCF7;LIF;COMMD3-BMI1;BMPR1B;KLF4;FGF2;DUSP9;ACVR2B;INHBE;MAPK13
Nitrogen metabolism	1/17	0.817231	0.999996	0	0	0.59449	0.119988	CA13
Phenylalanine metabolism	1/17	0.817231	0.999996	0	0	0.59449	0.119988	GOT1
Primary bile acid biosynthesis	1/17	0.817231	0.999996	0	0	0.59449	0.119988	CH25H
Cellular senescence	12/156	0.818321	0.999996	0	0	0.791623	0.158721	CDKN2B;RAD50;CXCL8;TSC1;ATM;E2F5;SQSTM1;RELA;MTOR;ATR;LIN52;MAPK13
Notch signaling pathway	4/59	0.82482	0.999996	0	0	0.691369	0.133151	JAG2;ADAM17;HEY1;NOTCH4
Type II diabetes mellitus	3/46	0.826212	0.999996	0	0	0.663323	0.126631	HKDC1;IRS2;MTOR
Prostate cancer	7/97	0.827029	0.999996	0	0	0.739115	0.14037	AR;CREB3;TCF7;PDGFC;BCL2;RELA;MTOR
NOD-like receptor signaling pathway	14/181	0.827072	0.999996	0	0	0.796185	0.151166	CXCL8;XIAP;NOD2;CXCL2;RELA;MAPK13;P2RX7;NAMPT;BCL2;PKN2;NLRP1;TP53BP1;NFKBIB;BIRC3
Viral myocarditis	4/60	0.834693	0.999996	0	0	0.678985	0.122687	LAMA1;HLA-DPB1;CYCS;CD55
p53 signaling pathway	5/73	0.835726	0.999996	0	0	0.698859	0.125413	BCL2;CYCS;TNFRSF10A;ATM;ATR
Breast cancer	11/147	0.837059	0.999996	0	0	0.768275	0.136646	JAG2;FZD5;HEY1;NOTCH4;TCF7;BRCA2;FGF2;ESR1;MTOR;FGF21;NFKB2
Cell adhesion molecules	11/148	0.843252	0.999996	0	0	0.762625	0.13002	CD274;OCLN;CLDN3;CLDN15;MPZ;ICAM2;HLA-DPB1;ICAM3;NRCAM;CDH15;CLDN1
Cell cycle	9/124	0.844832	0.999996	0	0	0.743458	0.12536	STAG1;CDKN2B;ORC6;ORC1;ESPL1;ATM;E2F5;ANAPC10;ATR
Pentose and glucuronate interconversions	2/34	0.847249	0.999996	0	0	0.594276	0.0985075	AKR1A1;XYLB
Intestinal immune network for IgA production	3/48	0.847539	0.999996	0	0	0.633772	0.104838	HLA-DPB1;CCL28;CCR10
Pathogenic Escherichia coli infection	15/197	0.85028	0.999996	0	0	0.782508	0.126915	CXCL8;SEC24A;WIPF3;TNFRSF10A;CLDN1;RELA;TUBA4A;MAPK13;OCLN;CLDN3;CLDN15;HCLS1;CYCS;ARHGEF1;NFKBIB
Ether lipid metabolism	3/49	0.857322	0.999996	0	0	0.61996	0.0954375	LPCAT1;CEPT1;SELENOI
Sphingolipid metabolism	3/49	0.857322	0.999996	0	0	0.61996	0.0954375	ASAH2;NEU1;KDSR
Cytosolic DNA-sensing pathway	4/63	0.861554	0.999996	0	0	0.644354	0.0960197	TREX1;POLR3E;RELA;NFKBIB
Phagosome	11/152	0.866209	0.999996	0	0	0.740825	0.106404	DYNC2H1;ATP6V0B;PIKFYVE;TFRC;HLA-DPB1;OLR1;TLR6;SEC22B;ATP6V0E2;TUBA4A;ATP6V1C1
Cholesterol metabolism	3/50	0.866551	0.999996	0	0	0.606736	0.0869053	NCEH1;NPC1;APOA4
Leishmaniasis	5/77	0.867828	0.999996	0	0	0.659887	0.0935469	HLA-DPB1;PTGS2;RELA;MAPK13;NFKBIB
Cortisol synthesis and secretion	4/65	0.877311	0.999996	0	0	0.623158	0.0815672	CREB3;NCEH1;PDE8A;ADCY7
Pantothenate and CoA biosynthesis	1/21	0.8775	0.999996	0	0	0.475487	0.062136	PANK3
Th1 and Th2 cell differentiation	6/92	0.881185	0.999996	0	0	0.662791	0.0838351	JAG2;HLA-DPB1;RELA;LAT;MAPK13;NFKBIB
Histidine metabolism	1/22	0.889162	0.999996	0	0	0.452819	0.0531956	CNDP2
Acute myeloid leukemia	4/67	0.89149	0.999996	0	0	0.603308	0.0692967	CEBPA;TCF7;RELA;MTOR
TGF-beta signaling pathway	6/94	0.893102	0.999996	0	0	0.647655	0.07322	CDKN2B;BMP2;E2F5;BMPR1B;ACVR2B;INHBE
Glucagon signaling pathway	7/107	0.893137	0.999996	0	0	0.664834	0.0751366	CREB3;PGAM2;PHKG2;PHKA1;PPARA;PRKAB1;ACACA
Thermogenesis	17/232	0.898506	0.999996	0	0	0.750135	0.0802806	ACSL1;TSC1;PRKAB1;ADCY7;MTOR;ATP5MC1;MAPK13;LIPE;CREB3;SLC25A29;AKT1S1;NDUFAF2;DPF3;PPARG;NDUFS1;NDUFV3;FGF21
Mannose type O-glycan biosynthesis	1/23	0.899714	0.999996	0	0	0.432213	0.0456757	POMT2
Proximal tubule bicarbonate reclamation	1/23	0.899714	0.999996	0	0	0.432213	0.0456757	MDH1
Necroptosis	11/159	0.899861	0.999996	0	0	0.705511	0.0744419	CYLD;H2AW;FTH1;CHMP4C;BCL2;XIAP;TNFRSF10A;PGAM5;SQSTM1;FTL;BIRC3
Phospholipase D signaling pathway	10/148	0.906297	0.999996	0	0	0.68787	0.067678	AGPAT5;RALA;CXCL8;PDGFC;TSC1;GAB2;ADCY7;DGKI;RAPGEF3;MTOR
Central carbon metabolism in cancer	4/70	0.910062	0.999996	0	0	0.57579	0.054264	HKDC1;IDH1;PGAM2;MTOR
Prolactin signaling pathway	4/70	0.910062	0.999996	0	0	0.57579	0.054264	TH;ESR1;RELA;MAPK13
Choline metabolism in cancer	6/98	0.913899	0.999996	0	0	0.619359	0.0557638	SLC22A5;CHKA;PDGFC;TSC1;DGKI;MTOR
Pathways in cancer	42/531	0.914181	0.999996	0	0	0.813134	0.0729601	CEBPA;RALA;CXCL8;MAX;LAMA1;NOTCH4;TCF7;MGST1;XIAP;CSF2RB;PTGS2;BRCA2;ADCY7;FGF2;RELA;BCL2L11;RPS6KA5;HEY1;HMOX1;FGF21;JAG2;CDKN2B;FZD5;MMP1;MLH1;ESR1;MTOR;EPOR;NFKB2;AR;BMP2;PAX8;COL4A4;COL4A3;CKS2;BCL2;CYCS;PPARG;ARHGEF1;BIRC7;BIRC3;F2RL3
Salmonella infection	18/249	0.914851	0.999996	0	0	0.738978	0.0657643	DYNC2H1;RALA;CXCL8;TCF7;AHNAK2;LY96;TNFRSF10A;PIK3C2A;RELA;TUBA4A;MAPK13;KLC4;BCL2;PLEKHM1;CYCS;TLR6;ACBD3;BIRC3
Complement and coagulation cascades	5/85	0.916328	0.999996	0	0	0.593635	0.0518723	PROS1;F12;C5AR1;CD55;F2RL3
Glutathione metabolism	3/57	0.917601	0.999996	0	0	0.52788	0.0453938	IDH1;MGST1;GGT1
Fluid shear stress and atherosclerosis	9/139	0.921154	0.999996	0	0	0.657125	0.0539687	MGST1;BCL2;HMOX1;BMPR1B;SQSTM1;ACVR2B;RELA;ASS1;MAPK13
Measles	9/139	0.921154	0.999996	0	0	0.657125	0.0539687	CSNK2A1;CSNK2A3;EIF2AK3;BCL2;CYCS;CBLB;RELA;HSPA1B;NFKBIB
AGE-RAGE signaling pathway in diabetic complications	6/100	0.922911	0.999996	0	0	0.606114	0.0486241	CXCL8;COL4A4;COL4A3;BCL2;RELA;MAPK13
Leukocyte transendothelial migration	7/114	0.925503	0.999996	0	0	0.621098	0.048084	AFDN;OCLN;CLDN3;CLDN15;CLDN1;RAPGEF3;MAPK13
Tuberculosis	12/180	0.930375	0.999996	0	0	0.677627	0.0489026	HSPA9;CYP27B1;ATP6V0B;NFYA;IRAK2;BCL2;HLA-DPB1;CYCS;TLR6;NOD2;RELA;MAPK13
Vasopressin-regulated water reabsorption	2/44	0.930947	0.999996	0	0	0.452531	0.03238	DYNC2H1;CREB3
Chagas disease	6/102	0.931084	0.999996	0	0	0.59342	0.0423737	ACE;GNAL;CXCL8;TLR6;RELA;MAPK13
Cushing syndrome	10/155	0.93196	0.999996	0	0	0.654407	0.0461132	CREB3;CDKN2B;NCEH1;RASD1;KMT2A;FZD5;TCF7;WDR5B;PDE8A;ADCY7
Thyroid hormone synthesis	4/75	0.934794	0.999996	0	0	0.535093	0.0360811	CREB3;PAX8;HSPA5;ADCY7
Protein digestion and absorption	6/103	0.934876	0.999996	0	0	0.58727	0.0395478	MME;SLC7A8;COL4A4;COL4A3;COL10A1;SLC36A4
Tight junction	11/169	0.935507	0.999996	0	0	0.66049	0.0440327	AFDN;OCLN;CLDN3;PARD6A;CLDN15;NEDD4;HCLS1;WHAMM;CLDN1;PRKAB1;TUBA4A
Glycosphingolipid biosynthesis	2/45	0.936357	0.999996	0	0	0.441983	0.0290639	B3GNT5;ST3GAL6
Steroid hormone biosynthesis	3/61	0.938056	0.999996	0	0	0.491366	0.0314204	AKR1C1;CYP1B1;HSD17B7
C-type lectin receptor signaling pathway	6/104	0.938481	0.999996	0	0	0.581245	0.0369047	CYLD;CBLB;PTGS2;RELA;NFKB2;MAPK13
FoxO signaling pathway	8/131	0.938678	0.999996	0	0	0.617268	0.0390625	CDKN2B;BCL2L11;SETD7;IRS2;ATM;FOXO4;PRKAB1;MAPK13
Pancreatic cancer	4/76	0.93893	0.999996	0	0	0.527631	0.0332485	RALA;BRCA2;RELA;MTOR
Pertussis	4/76	0.93893	0.999996	0	0	0.527631	0.0332485	CXCL8;LY96;RELA;MAPK13
Proteasome	2/46	0.941364	0.999996	0	0	0.431914	0.0260986	PSMD12;PSMC4
Rap1 signaling pathway	14/210	0.943164	0.999996	0	0	0.677285	0.0396313	RALA;ADCY7;FGF2;MAPK13;AFDN;EFNA3;PARD6A;ADORA2B;PDGFC;KRIT1;RAPGEF3;LAT;F2RL3;FGF21
Basal cell carcinoma	3/63	0.94642	0.999996	0	0	0.474934	0.0261539	BMP2;FZD5;TCF7
Antigen processing and presentation	4/78	0.946493	0.999996	0	0	0.513314	0.0282278	HSPA5;NFYA;HLA-DPB1;HSPA1B
Th17 cell differentiation	6/107	0.948254	0.999996	0	0	0.563886	0.0299612	HLA-DPB1;LAT;RELA;MTOR;NFKBIB;MAPK13
Ascorbate and aldarate metabolism	1/30	0.950222	0.999996	0	0	0.327759	0.0167353	AKR1A1
Endocytosis	17/252	0.952391	0.999996	0	0	0.685526	0.0334396	ARF4;ARFGEF2;TFRC;IQSEC2;WIPF3;GBF1;CBLB;STAM;RBSN;SPART;PARD6A;DNAJC6;NEDD4;CHMP4C;VPS35;FOLR3;HSPA1B
Inflammatory bowel disease	3/65	0.953723	0.999996	0	0	0.459563	0.021775	HLA-DPB1;NOD2;RELA
HIF-1 signaling pathway	6/109	0.953969	0.999996	0	0	0.552876	0.0260537	TFRC;HKDC1;BCL2;HMOX1;RELA;MTOR
Asthma	1/31	0.954963	0.999996	0	0	0.316816	0.0145998	HLA-DPB1
Circadian rhythm	1/31	0.954963	0.999996	0	0	0.316816	0.0145998	PRKAB1
Yersinia infection	8/137	0.955244	0.999996	0	0	0.588361	0.0269402	CXCL8;ARHGEF28;WIPF3;ARHGEF1;PKN2;LAT;RELA;MAPK13
Malaria	2/50	0.957884	0.999996	0	0	0.395833	0.0170322	CXCL8;GYPC
Glycolysis / Gluconeogenesis	3/67	0.960087	0.999996	0	0	0.445152	0.0181318	HKDC1;PGAM2;AKR1A1
Human T-cell leukemia virus 1 infection	14/219	0.961492	0.999996	0	0	0.647225	0.0254157	FDPS;VAC14;CDKN2B;XIAP;ADCY7;ANAPC10;RELA;NFKB2;CREB3;ZFP36;ESPL1;HLA-DPB1;ATM;ATR
mRNA surveillance pathway	5/98	0.962311	0.999996	0	0	0.510285	0.0196037	UPF2;NUDT21;NXT1;RNMT;UPF3B
Fc epsilon RI signaling pathway	3/68	0.962951	0.999996	0	0	0.438279	0.0165463	GAB2;LAT;MAPK13
Shigellosis	16/246	0.963776	0.999996	0	0	0.659062	0.0243171	CXCL8;FOXO4;RELA;MTOR;MAPK13;RPS6KA5;RRAGC;HKDC1;RRAGD;AKT1S1;BCL2;HCLS1;CYCS;ATM;SQSTM1;NFKBIB
Hematopoietic cell lineage	5/99	0.964641	0.999996	0	0	0.504828	0.0181734	TFRC;MME;HLA-DPB1;CD55;EPOR
Amphetamine addiction	3/69	0.965621	0.999996	0	0	0.431615	0.0150996	CREB3;TH;FOSB
Progesterone-mediated oocyte maturation	5/100	0.966837	0.999996	0	0	0.499487	0.0168451	CPEB1;ADCY7;ANAPC10;CPEB4;MAPK13
Oocyte meiosis	7/129	0.967517	0.999996	0	0	0.54428	0.0179731	AR;CPEB1;ESPL1;ADCY7;ANAPC10;CPEB4;MAPK13
Relaxin signaling pathway	7/129	0.967517	0.999996	0	0	0.54428	0.0179731	CREB3;MMP1;COL4A4;COL4A3;ADCY7;RELA;MAPK13
Parkinson disease	16/249	0.968138	0.999996	0	0	0.650467	0.0210625	PSMD12;HSPA5;LRRK2;EIF2AK3;TUBA4A;ATP5MC1;ERN1;KLC4;GNAL;TH;PSMC4;DDIT3;CYCS;NDUFS1;NDUFV3;ATF6
Melanoma	3/72	0.972582	0.999996	0	0	0.41278	0.0114755	PDGFC;FGF2;FGF21
Starch and sucrose metabolism	1/36	0.972697	0.999996	0	0	0.271481	0.00751534	HKDC1
ECM-receptor interaction	4/88	0.972953	0.999996	0	0	0.451954	0.0123923	LAMA1;COL4A4;COL4A3;CHAD
Gap junction	4/88	0.972953	0.999996	0	0	0.451954	0.0123923	PDGFC;HTR2B;ADCY7;TUBA4A
T cell receptor signaling pathway	5/104	0.97442	0.999996	0	0	0.479199	0.0124172	CBLB;LAT;RELA;NFKBIB;MAPK13
Toll-like receptor signaling pathway	5/104	0.97442	0.999996	0	0	0.479199	0.0124172	CXCL8;LY96;TLR6;RELA;MAPK13
Hedgehog signaling pathway	2/56	0.974578	0.999996	0	0	0.351735	0.0090573	BCL2;CDON
Sphingolipid signaling pathway	6/119	0.974848	0.999996	0	0	0.503669	0.0128303	ASAH2;BCL2;GAB2;RELA;NSMAF;MAPK13
Neutrophil extracellular trap formation	11/189	0.975375	0.999996	0	0	0.585624	0.0146015	HDAC4;H2AW;CLCN5;H2BC15;CLCN4;C5AR1;CLCN3;HDAC6;RELA;MTOR;MAPK13
Bile secretion	4/90	0.976494	0.999996	0	0	0.441395	0.0104995	ABCC4;NCEH1;HMGCR;ADCY7
Hypertrophic cardiomyopathy	4/90	0.976494	0.999996	0	0	0.441395	0.0104995	ACE;LAMA1;CACNA2D2;PRKAB1
Gastric cancer	8/149	0.976907	0.999996	0	0	0.537929	0.0125682	CDKN2B;FZD5;TCF7;BCL2;MLH1;FGF2;MTOR;FGF21
Cytokine-cytokine receptor interaction	19/295	0.976969	0.999996	0	0	0.651554	0.0151812	IL32;CXCL8;TSLP;GDF15;LIF;IL20RB;CSF2RB;TNFRSF10A;CXCL2;ACVR2B;EDA2R;EPOR;INHBE;BMP2;TNFRSF14;BMPR1B;CCL28;CCR10;CCL26
Allograft rejection	1/38	0.977651	0.999996	0	0	0.256778	0.00580377	HLA-DPB1
Endometrial cancer	2/58	0.978558	0.999996	0	0	0.339135	0.00735076	TCF7;MLH1
Metabolism of xenobiotics by cytochrome P450	3/76	0.979806	0.999996	0	0	0.390076	0.00795788	AKR1C1;MGST1;CYP1B1
Kaposi sarcoma-associated herpesvirus infection	11/193	0.979931	0.999996	0	0	0.572626	0.0116092	ZFP36;CXCL8;CLEC2B;TCF7;CYCS;PTGS2;FGF2;CXCL2;RELA;MTOR;MAPK13
VEGF signaling pathway	2/59	0.980315	0.999996	0	0	0.333167	0.00662392	PTGS2;MAPK13
Prion disease	17/273	0.980394	0.999996	0	0	0.628552	0.0124461	PRNP;PSMD12;CSNK2A1;HSPA5;CSNK2A3;EIF2AK3;TUBA4A;ATP5MC1;MAPK13;KLC4;CREB3;PSMC4;DDIT3;CYCS;NDUFS1;NDUFV3;HSPA1B
Pathways of neurodegeneration	33/475	0.981139	0.999996	0	0	0.705301	0.0134296	PSMD12;TOMM40;DNAH2;LRRK2;DERL1;PTGS2;RELA;ATP5MC1;KLC4;ATG101;NDUFV3;PRPH;DNAH12;PRNP;CSNK2A1;FZD5;HSPA5;CSNK2A3;EIF2AK3;RAB39B;DKK1;TUBA4A;MTOR;MAPK13;ERN1;PSMC4;DDIT3;BCL2;CYCS;SMCR8;NDUFS1;ATF6;SQSTM1
Arrhythmogenic right ventricular cardiomyopathy	3/77	0.981305	0.999996	0	0	0.384783	0.00726161	LAMA1;TCF7;CACNA2D2
Platelet activation	6/124	0.981612	0.999996	0	0	0.482193	0.00894908	P2RX1;ARHGEF1;ADCY7;FERMT3;MAPK13;F2RL3
Arachidonic acid metabolism	2/61	0.983418	0.999996	0	0	0.321838	0.00538131	GGT1;PTGS2
Chemical carcinogenesis	14/239	0.984811	0.999996	0	0	0.589035	0.00901545	MGST1;XIAP;PTGS2;KLF4;ADCY7;FGF2;ESR1;RELA;MTOR;AR;CREB3;BCL2;CYP1B1;PPARA
Graft-versus-host disease	1/42	0.985027	0.999996	0	0	0.231675	0.00349517	HLA-DPB1
Human papillomavirus infection	21/331	0.985116	0.999996	0	0	0.640613	0.00960651	ATP6V0B;FZD5;LAMA1;NOTCH4;TCF7;UBR4;TSC1;PTGS2;RELA;MTOR;CREB3;PARD6A;HEY1;COL4A4;COL4A3;CHAD;ATM;ATP6V0E2;HES2;ATP6V1C1;ATR
Hepatitis C	8/157	0.985458	0.999996	0	0	0.50882	0.00745334	OCLN;CLDN3;CLDN15;EIF2AK3;CYCS;PPARA;CLDN1;RELA
Calcium signaling pathway	14/240	0.985533	0.999996	0	0	0.586396	0.00854519	HTR2B;PHKA1;MCOLN1;ADCY7;FGF2;P2RX7;GNAL;LTB4R2;STIM2;ADORA2B;P2RX1;PDGFC;PHKG2;FGF21
Spinocerebellar ataxia	7/143	0.985903	0.999996	0	0	0.487871	0.0069263	ERN1;PSMD12;NFYA;ATG101;PSMC4;CYCS;MTOR
Cholinergic synapse	5/113	0.985977	0.999996	0	0	0.439046	0.00620041	CREB3;KCNJ14;BCL2;ADCY7;KCNJ2
Alcoholism	10/186	0.986008	0.999996	0	0	0.538211	0.00758367	HDAC4;H2AW;CREB3;H2BC15;TH;ADORA2B;FOSB;SLC29A3;CAMKK1;HDAC6
Influenza A	9/172	0.986061	0.999996	0	0	0.523125	0.00734303	DNAJC3;FDPS;CXCL8;NXT1;HLA-DPB1;CYCS;TNFRSF10A;RELA;NFKBIB
Type I diabetes mellitus	1/43	0.986453	0.999996	0	0	0.226147	0.00308445	HLA-DPB1
Aldosterone synthesis and secretion	4/98	0.98674	0.999996	0	0	0.40365	0.00538831	NR4A2;LIPE;CREB3;ADCY7
Inflammatory mediator regulation of TRP channels	4/98	0.98674	0.999996	0	0	0.40365	0.00538831	HTR2B;ASIC3;ADCY7;MAPK13
Epstein-Barr virus infection	11/202	0.987501	0.999996	0	0	0.545369	0.00685949	PSMD12;BCL2L11;PSMC4;NEDD4;HLA-DPB1;BCL2;CYCS;RELA;NFKB2;NFKBIB;MAPK13
Viral carcinogenesis	11/203	0.988155	0.999996	0	0	0.542498	0.00646443	HDAC4;CREB3;VAC14;CDKN2B;H2BC15;DNAJA3;REL;UBR4;RELA;HDAC6;NFKB2
JAK-STAT signaling pathway	8/162	0.989195	0.999996	0	0	0.492163	0.0053467	TSLP;LIF;BCL2;IL20RB;CSF2RB;STAM;EPOR;MTOR
Aminoacyl-tRNA biosynthesis	2/66	0.98924	0.999996	0	0	0.296612	0.00320887	FARSA;VARS1
Melanogenesis	4/101	0.989348	0.999996	0	0	0.391101	0.00418847	CREB3;FZD5;TCF7;ADCY7
Oxidative phosphorylation	6/133	0.989709	0.999996	0	0	0.447797	0.00463207	ATP6V0B;NDUFS1;NDUFV3;ATP6V0E2;ATP6V1C1;ATP5MC1
ErbB signaling pathway	3/85	0.990005	0.999996	0	0	0.347089	0.00348673	CBLB;NRG1;MTOR
Growth hormone synthesis, secretion and action	5/119	0.990717	0.999996	0	0	0.4158	0.00387797	CREB3;IRS2;ADCY7;MTOR;MAPK13
Adrenergic signaling in cardiomyocytes	7/150	0.990886	0.999996	0	0	0.463808	0.00424667	CREB3;RPS6KA5;BCL2;CACNA2D2;ADCY7;RAPGEF3;MAPK13
Carbohydrate digestion and absorption	1/47	0.990925	0.999996	0	0	0.206436	0.00188203	HKDC1
Alzheimer disease	23/369	0.991138	0.999996	0	0	0.628018	0.00559055	PSMD12;CSNK2A1;FZD5;MME;CSNK2A3;EIF2AK3;IRS2;PTGS2;DKK1;RELA;TUBA4A;MTOR;ATP5MC1;ERN1;KLC4;ADAM17;PSMC4;ATG101;DDIT3;CYCS;NDUFS1;NDUFV3;ATF6
Renin secretion	2/69	0.991717	0.999996	0	0	0.283284	0.00235619	ACE;KCNJ2
Estrogen signaling pathway	6/137	0.992099	0.999996	0	0	0.434027	0.00344273	CREB3;KRT15;BCL2;ESR1;ADCY7;HSPA1B
Axon guidance	9/182	0.992189	0.999996	0	0	0.492612	0.00386274	ROBO3;EFNA3;PARD6A;ABLIM3;SEMA3B;PLXNB3;SRGAP3;LRIG2;BMPR1B
MAPK signaling pathway	17/294	0.992575	0.999996	0	0	0.580216	0.0043241	DUSP4;PTPRR;MAX;CACNA2D2;DUSP9;FGF2;RELA;NFKB2;MAPK13;EFNA3;RPS6KA5;DDIT3;PDGFC;MAP3K13;LAMTOR3;HSPA1B;FGF21
Drug metabolism	4/108	0.993662	0.999996	0	0	0.364635	0.00231841	TPMT;NME7;MGST1;UPP1
Morphine addiction	3/91	0.993809	0.999996	0	0	0.323316	0.00200777	PDE4D;PDE8A;ADCY7
RNA transport	9/186	0.993842	0.999996	0	0	0.481372	0.00297365	NDC1;UPF2;RANBP2;PRMT5;NXT1;UPF3B;THOC3;AAAS;NUP58
cAMP signaling pathway	11/216	0.994216	0.999996	0	0	0.507727	0.00294513	LIPE;AFDN;ABCC4;CREB3;GIPR;ACOX1;PDE4D;PPARA;ADCY7;RAPGEF3;RELA
Diabetic cardiomyopathy	10/203	0.994661	0.999996	0	0	0.490338	0.00262491	ACE;MPC1;GFPT1;NDUFS1;NDUFV3;PPARA;RELA;MTOR;ATP5MC1;MAPK13
Ras signaling pathway	12/232	0.994763	0.999996	0	0	0.51596	0.00270918	AFDN;EFNA3;RALA;PDGFC;REL;GAB2;FOXO4;RASAL3;FGF2;RELA;LAT;FGF21
Autoimmune thyroid disease	1/53	0.995024	0.999996	0	0	0.182556	0.000910683	HLA-DPB1
Endocrine and other factor-regulated calcium reabsorption	1/53	0.995024	0.999996	0	0	0.182556	0.000910683	ESR1
Glycosaminoglycan biosynthesis	1/53	0.995024	0.999996	0	0	0.182556	0.000910683	B4GALT7
Staphylococcus aureus infection	3/95	0.99552	0.999996	0	0	0.30919	0.00138838	KRT15;C5AR1;HLA-DPB1
Chronic myeloid leukemia	2/76	0.995527	0.999996	0	0	0.256387	0.00114945	GAB2;RELA
Gastric acid secretion	2/76	0.995527	0.999996	0	0	0.256387	0.00114945	ADCY7;KCNJ2
Dilated cardiomyopathy	3/96	0.99587	0.999996	0	0	0.305849	0.00126592	LAMA1;CACNA2D2;ADCY7
Huntington disease	17/306	0.995879	0.999996	0	0	0.55575	0.00229508	DNAH12;PSMD12;DNAH2;TUBA4A;MTOR;ATP5MC1;ERN1;KLC4;CREB3;PSMC4;ATG101;CYCS;TAF4B;PPARG;NDUFS1;NDUFV3;RCOR1
Circadian entrainment	3/97	0.996193	0.999996	0	0	0.302578	0.0011542	RPS6KA5;RASD1;ADCY7
B cell receptor signaling pathway	2/81	0.997131	0.999996	0	0	0.240093	0.000689757	RELA;NFKBIB
Hepatocellular carcinoma	7/168	0.997172	0.999996	0	0	0.411541	0.00116532	PBRM1;FZD5;TCF7;MGST1;DPF3;HMOX1;MTOR
Apelin signaling pathway	5/137	0.997433	0.999996	0	0	0.35874	0.000922047	HDAC4;LIPE;PRKAB1;ADCY7;MTOR
Oxytocin signaling pathway	6/154	0.997526	0.999996	0	0	0.383809	0.000950537	KCNJ14;CACNA2D2;PTGS2;PRKAB1;ADCY7;KCNJ2
Thyroid hormone signaling pathway	4/121	0.997647	0.999996	0	0	0.323886	0.000762916	PFKFB2;NOTCH4;ESR1;MTOR
Insulin secretion	2/86	0.998166	0.999996	0	0	0.225739	0.000414463	CREB3;ADCY7
GnRH secretion	1/64	0.998346	0.999996	0	0	0.150589	0.00024927	HCN3
Chemokine signaling pathway	8/192	0.998371	0.999996	0	0	0.41123	0.00067054	CXCL8;CXCL2;ADCY7;CCL28;CCR10;RELA;NFKBIB;CCL26
Human cytomegalovirus infection	10/225	0.998585	0.999996	0	0	0.439623	0.000622481	CREB3;CXCL8;CYCS;ARHGEF1;TSC1;PTGS2;ADCY7;RELA;MTOR;MAPK13
Hepatitis B	6/162	0.998594	0.999996	0	0	0.363965	0.000511978	CREB3;CXCL8;BCL2;CYCS;RELA;MAPK13
GABAergic synapse	2/89	0.998599	0.999996	0	0	0.217919	0.000305504	ADCY7;SLC38A5
Hippo signaling pathway	6/163	0.998691	0.999996	0	0	0.361626	0.000473626	BMP2;PARD6A;FZD5;TCF7;BMPR1B;BIRC3
Long-term potentiation	1/67	0.998775	0.999996	0	0	0.14372	0.000176165	RAPGEF3
Retrograde endocannabinoid signaling	5/148	0.998864	0.999996	0	0	0.330942	0.000376203	NDUFS1;NDUFV3;PTGS2;ADCY7;MAPK13
Retinol metabolism	1/68	0.998892	0.999996	0	0	0.141567	0.000156998	RDH11
Natural killer cell mediated cytotoxicity	4/131	0.998924	0.999996	0	0	0.298217	0.000321173	ICAM2;TNFRSF10A;LAT;ULBP3
Serotonergic synapse	3/113	0.998988	0.999996	0	0	0.258337	0.000261686	HTR2B;PTGS2;RAPGEF3
Dopaminergic synapse	4/132	0.999005	0.999996	0	0	0.295871	0.000294434	CREB3;GNAL;TH;MAPK13
GnRH signaling pathway	2/93	0.999023	0.999996	0	0	0.208294	0.00020356	ADCY7;MAPK13
Focal adhesion	8/201	0.999104	0.999996	0	0	0.391856	0.000351079	LAMA1;COL4A4;PDGFC;COL4A3;CHAD;BCL2;XIAP;BIRC3
MicroRNAs in cancer	15/310	0.99926	0.999996	0	0	0.479723	0.000355288	HDAC4;NOTCH4;IRS2;PTGS2;MTOR;EFNA3;RPS6KA5;BCL2L11;MMP16;BCL2;CYP1B1;COMMD3-BMI1;HMOX1;SPRY2;ATM
Proteoglycans in cancer	8/205	0.999316	0.999996	0	0	0.383814	0.000262571	FZD5;HCLS1;ANK2;ARHGEF1;FGF2;ESR1;MTOR;MAPK13
Fc gamma R-mediated phagocytosis	2/97	0.99932	0.999996	0	0	0.199479	0.000135749	GAB2;LAT
Glioma	1/75	0.999449	0.999996	0	0	0.128126	7.05807e-05	MTOR
Bacterial invasion of epithelial cells	1/77	0.999549	0.999996	0	0	0.12474	5.6288e-05	HCLS1
Pancreatic secretion	2/102	0.999568	0.999996	0	0	0.189453	8.1924e-05	RAB27B;ADCY7
Human immunodeficiency virus 1 infection	8/212	0.999575	0.999996	0	0	0.370499	0.000157369	DCAF1;BCL2;CYCS;ATM;RELA;MTOR;ATR;MAPK13
Wnt signaling pathway	5/166	0.999711	0.999996	0	0	0.293648	8.49371e-05	CSNK2A1;FZD5;CSNK2A3;TCF7;DKK1
Spliceosome	4/150	0.999764	0.999996	0	0	0.259134	6.11487e-05	SART1;DDX46;THOC3;HSPA1B
Vascular smooth muscle contraction	3/133	0.999814	0.999996	0	0	0.21835	4.0725e-05	ADORA2B;ARHGEF1;ADCY7
Taste transduction	1/86	0.999815	0.999996	0	0	0.111477	2.05877e-05	PKD2L1
Cardiac muscle contraction	1/87	0.999833	0.999996	0	0	0.110175	1.84367e-05	CACNA2D2
Systemic lupus erythematosus	3/135	0.999843	0.999996	0	0	0.215017	3.38494e-05	H2AW;H2BC15;HLA-DPB1
PI3K-Akt signaling pathway	16/354	0.999862	0.999996	0	0	0.445764	6.16652e-05	LAMA1;TSC1;FGF2;RELA;EPOR;MTOR;CREB3;EFNA3;BCL2L11;COL4A4;PDGFC;COL4A3;CHAD;BCL2;PKN2;FGF21
Coronavirus disease	8/232	0.999893	0.999996	0	0	0.337042	3.6043e-05	ADAM17;ACE;CXCL8;MMP1;C5AR1;RELA;NFKBIB;MAPK13
Salivary secretion	1/93	0.999907	0.999996	0	0	0.102955	9.58049e-06	ADCY7
cGMP-PKG signaling pathway	4/167	0.999939	0.999996	0	0	0.231888	1.4077e-05	CREB3;IRS2;ADRA2C;ADCY7
Neuroactive ligand-receptor interaction	13/341	0.999979	0.999996	0	0	0.372842	7.81855e-06	P2RY11;GIPR;C5AR1;HTR2B;ADRA2C;LTB4R;P2RX7;LTB4R2;GLRB;ADORA2B;CHRNE;P2RX1;F2RL3
Glutamatergic synapse	1/114	0.999986	0.999996	0	0	0.083724	1.19267e-06	ADCY7
Regulation of actin cytoskeleton	5/218	0.999992	0.999996	0	0	0.221316	1.87189e-06	PIKFYVE;PDGFC;ARHGEF1;FGF2;FGF21
Olfactory transduction	1/440	0.999995	0.999996	0	0	0.0211602	1.09869e-07	GNAL
Ribosome	1/158	0.999996	0.999996	0	0	0.0601125	2.33352e-07	MRPL2

## Sheet: DOWN_Reactome
Term	Overlap	P-value	Adjusted P-value	Old P-value	Old Adjusted P-value	Odds Ratio	Combined Score	Genes
Extracellular matrix organization Homo sapiens R-HSA-1474244	123/283	5.97995e-37	7.77394e-34	0	0	5.31369	443.2	SPARC;COL16A1;SERPINE1;COL12A1;TNC;LOXL3;LOXL4;PLOD2;ICAM5;PLOD1;LOXL1;LOXL2;COMP;EFEMP2;EFEMP1;CAPN5;CAPN1;COL27A1;ACTN1;PCOLCE;HSPG2;COL4A2;COL4A1;COL8A2;COL8A1;COL4A5;ADAM9;PPIB;CD151;SDC2;SDC3;PDGFB;LTBP4;HTRA1;PDGFA;FBLN1;LTBP2;LTBP3;NID1;FBLN2;LTBP1;NID2;FBLN5;VTN;A2M;TGFB2;TGFB1;VCAM1;TGFB3;FN1;GDF5;COL1A1;BMP4;COL1A2;BMP1;P4HA1;COL5A1;ITGA10;COL5A3;COL5A2;ITGA11;COL9A2;FBN1;DDR1;ITGB1;COL…
Elastic fibre formation Homo sapiens R-HSA-1566948	30/41	1.95178e-18	1.26865e-15	0	0	18.3302	747.466	ITGB1;ITGB5;ELN;ITGB3;LTBP4;LOXL3;LOXL4;FBLN1;LTBP2;LTBP3;FBLN2;LTBP1;LOXL1;FBLN5;LOXL2;VTN;EFEMP2;EFEMP1;ITGAV;TGFB2;TGFB1;TGFB3;GDF5;MFAP5;BMP4;MFAP4;MFAP2;ITGA8;ITGA5;FBN1
Molecules associated with elastic fibres Homo sapiens R-HSA-2129379	23/30	3.52064e-15	1.52561e-12	0	0	22.029	733.128	ITGB1;TGFB2;TGFB1;ITGB5;TGFB3;ITGB3;LTBP4;FBLN1;LTBP2;LTBP3;FBLN2;LTBP1;GDF5;FBLN5;MFAP5;BMP4;VTN;MFAP4;EFEMP2;EFEMP1;MFAP2;ITGA8;ITGAV
Collagen biosynthesis and modifying enzymes Homo sapiens R-HSA-1650814	34/63	1.1745e-14	3.81712e-12	0	0	7.88393	252.88	COL18A1;COLGALT2;COL15A1;COL16A1;PCOLCE2;COL14A1;COL12A1;COL11A2;PLOD2;PLOD1;ADAMTS2;ADAMTS3;COL27A1;PCOLCE;COL1A1;COL3A1;COL1A2;BMP1;COL4A2;P4HA1;COL5A1;COL4A1;COL6A2;COL5A3;COL7A1;COL6A1;COL5A2;COL8A2;COL4A5;COL8A1;COL6A3;COL21A1;COL9A2;PPIB
Collagen formation Homo sapiens R-HSA-1474290	40/85	2.3907e-14	6.21581e-12	0	0	5.98576	187.741	COL18A1;COLGALT2;COL15A1;COL16A1;CD151;PCOLCE2;COL14A1;COL12A1;LAMA3;COL11A2;LOXL3;LOXL4;PLOD2;PLOD1;LOXL1;LOXL2;ADAMTS2;ADAMTS3;COL27A1;PCOLCE;COL1A1;COL3A1;COL1A2;BMP1;COL4A2;P4HA1;COL5A1;COL4A1;COL6A2;COL5A3;COL7A1;COL6A1;COL5A2;COL8A2;COL4A5;COL8A1;COL6A3;COL21A1;COL9A2;PPIB
ECM proteoglycans Homo sapiens R-HSA-3000178	30/55	2.93988e-13	6.36974e-11	0	0	8.0588	232.539	ITGB1;LAMA5;SPARC;ITGB5;LAMA2;ITGB3;LAMA4;SERPINE1;LAMA3;TNC;LRP4;LAMC1;COMP;VTN;ACAN;ITGAV;TGFB2;TGFB1;LUM;TGFB3;BGN;LAMB1;DCN;ASPN;VCAN;ITGA8;ITGA7;COL9A2;AGRN;MATN3
Non-integrin membrane-ECM interactions Homo sapiens R-HSA-3000171	24/42	1.84248e-11	3.06957e-09	0	0	8.93709	220.901	ITGB1;DDR1;LAMA5;TGFB1;LAMA2;ITGB5;SDC2;LAMA4;ITGB3;ACTN1;LAMA3;SDC3;TNC;PDGFB;NTN4;PDGFA;LAMB1;LAMC1;THBS1;HSPG2;VTN;ITGAV;DMD;AGRN
Smooth Muscle Contraction Homo sapiens R-HSA-445355	21/33	1.88897e-11	3.06957e-09	0	0	11.7204	289.405	ITGB5;ANXA2;TPM4;TPM2;ITGA1;TPM1;LMOD1;SORBS1;SORBS3;MYL12A;ACTG2;MYLK;MYL12B;ACTA2;MYL6;CALD1;ANXA6;MYH11;CALM1;MYL9;VCL
Integrin cell surface interactions Homo sapiens R-HSA-216083	31/67	3.3777e-11	4.8789e-09	0	0	5.78151	139.399	ITGB1;COL18A1;COL16A1;ITGB5;ITGB3;TNC;ITGAE;ICAM5;THBS1;COMP;VTN;ITGAV;JAM2;VCAM1;ITGA4;ITGA3;LUM;ITGA1;FN1;HSPG2;COL4A2;COL4A1;ITGA10;ITGA11;ITGA8;ITGA7;ITGA5;COL9A2;AGRN;CD44;FBN1
Assembly of collagen fibrils and other multimeric structures Homo sapiens R-HSA-2022090	27/54	6.61419e-11	8.59844e-09	0	0	6.70711	157.209	COL18A1;COL15A1;CD151;LAMA3;COL11A2;LOXL3;LOXL4;LOXL1;LOXL2;COL27A1;PCOLCE;COL1A1;COL3A1;COL1A2;BMP1;COL4A2;COL5A1;COL4A1;COL6A2;COL5A3;COL7A1;COL6A1;COL5A2;COL8A2;COL4A5;COL8A1;COL6A3
Diseases of glycosylation Homo sapiens R-HSA-3781865	36/88	7.31078e-11	8.64001e-09	0	0	4.65288	108.594	SEMA5A;SEMA5B;SPON2;NOTCH3;SDC2;SDC3;PRELP;ADAMTS12;THBS2;THBS1;ADAMTS10;THSD4;ADAMTSL1;ADAMTS4;ADAMTS15;ACAN;ADAMTS2;MUC1;ADAMTS3;ADAMTS1;ADAMTSL4;GPC1;ADAMTSL2;GPC4;ADAMTS9;GPC6;ADAMTS6;ADAMTS7;LUM;BGN;HSPG2;DCN;VCAN;OGN;CSPG4;AGRN
Axon guidance Homo sapiens R-HSA-422475	118/515	4.21812e-10	4.56963e-08	0	0	2.02216	43.6512	SEMA5A;EPHB6;PLXND1;FGF1;ACTB;ACTG1;RPS6KA4;DPYSL4;FGF9;DPYSL3;CFL1;EPHB1;EPHA5;PDGFRB;PDGFRA;UNC5C;FRS3;ANK1;MYL6;CACNB3;CACNB4;COL4A2;COL4A1;PSME2;COL4A5;MYL9;EPHA3;VCL;EPHA2;PFN2;SEMA7A;SDC2;PDGFB;PDGFA;CACNA1C;KALRN;RASGRP1;MYL12A;CACNA1H;MYL12B;RASGRP3;EFNB2;EFNB1;RRAS;MYH11;PIP5K1C;SCN3A;MYH10;LYN;VASP;FN1;MSN;ARPC4;ARPC5;PTK2;GRIN2D;FES;ITGA10;KIF4A;PLXNB1;COL9A2;CALM1;SCN2A;ITGB1;NRP1;CNT…
Interferon alpha/beta signaling Homo sapiens R-HSA-909733	29/68	1.5747e-09	1.5747e-07	0	0	4.98774	101.098	IFITM3;IFITM1;IFITM2;IFI6;IFI35;IFIT1;SAMHD1;IFIT3;SOCS3;SOCS1;GBP2;IP6K2;IFNAR2;EGR1;HLA-H;STAT1;MX2;MX1;HLA-C;ISG15;HLA-F;HLA-G;HLA-E;ISG20;OAS1;IFI27;OAS2;OAS3;IRF9
Platelet degranulation Homo sapiens R-HSA-114608	37/105	5.67413e-09	5.26883e-07	0	0	3.65496	69.398	LGALS3BP;ITIH4;ECM1;ITIH3;SPARC;WDR1;ITGB3;SERPINE1;PDGFB;PDGFA;CLU;THBS1;ISLR;CLEC3B;CFL1;HABP4;TIMP3;PHACTR2;FLNA;QSOX1;FAM3C;TIMP1;A2M;SRGN;TGFB2;TGFB1;TGFB3;ACTN1;IGF2;FN1;APOA1;ACTN4;SOD1;SERPING1;CALM1;GAS6;VCL
Muscle contraction Homo sapiens R-HSA-397014	56/196	6.82908e-09	5.91853e-07	0	0	2.69558	50.6826	ITGB5;LMOD1;ATP2A2;SLC8A1;ACTG2;MYLK;ANXA6;SCN5A;TMOD1;KCND1;ANXA2;KCND2;TPM4;KCND3;CACNA2D1;TPM2;TMOD2;TPM1;ITGA1;ABCC9;ATP1B2;ATP1B1;MYL4;ACTA2;KAT2B;MYL6;CACNB3;CACNB4;MYH3;TNNT2;MYL9;VCL;CAMK2B;ITPR1;CACNA1C;ATP1A1;MYL12A;MYL12B;CALD1;DMD;MYH11;SCN3A;CORIN;WWTR1;DMPK;KCNJ12;ATP2B4;SORBS1;SORBS3;DES;VIM;CALM1;SCN2A;KCNK2;FGF11;KCNK3
Laminin interactions Homo sapiens R-HSA-3000157	15/23	9.34962e-09	7.59657e-07	0	0	12.5315	231.681	ITGB1;COL18A1;LAMA5;LAMA2;ITGA3;LAMA4;ITGA1;LAMA3;LAMB1;LAMC1;NID1;NID2;HSPG2;ITGA7;ITGAV
Hemostasis Homo sapiens R-HSA-109582	119/552	1.58132e-08	1.14327e-06	0	0	1.86653	33.5274	SPARC;SERPINE2;SERPINE1;PLAT;CLU;SLC8A1;ISLR;PLAU;CFL1;HABP4;SIRPA;FAM3C;SLC16A3;GUCY1A2;PRKCH;PRKCE;ACTN1;F2R;ACTN4;MIF;ATP1B2;ATP1B1;PROCR;PRKAR1B;SERPING1;KIF20A;KIF20B;ZFPM2;VCL;PDE1A;PDGFB;GATA6;ITPR1;PDGFA;AK3;PIK3R1;RASGRP2;RASGRP1;GNG10;TBXA2R;KIF3C;A2M;S100A10;LYN;TGFB2;TGFB1;TGFB3;CAV1;PDE2A;FN1;IGF2;GNG11;PTK2;EHD2;EHD3;KIF18B;ITGA10;KIF4A;CDK2;PDE3A;ESAM;CALM1;ITGB1;LGALS3BP;ECM1;WDR1…
Signaling by Rho GTPases Homo sapiens R-HSA-194315	87/367	1.58299e-08	1.14327e-06	0	0	2.10236	37.7613	ITGB1;ARHGAP11A;ERCC6L;ARPC1B;KIF14;BUB1B;ARHGAP6;ACTB;MYLK;ACTG1;CDC20;SYDE1;NUF2;ARHGDIB;RAC3;SPDL1;ACTR3;PLEKHG2;ARHGEF17;PLEKHG5;ARAP3;CYBA;PPP2R5D;GMIP;RHOC;CDC25C;RHOD;RHOB;CIT;MYL6;RHOJ;ARHGEF3;ARHGEF4;BIRC5;MYH9;TAX1BP3;KIF2C;EVL;PPP1R12B;MYL9;PFN2;SRF;CDCA8;ARHGAP18;IQGAP3;KALRN;CENPA;SKA1;RHOBTB1;AURKB;MYL12B;SKA2;ARHGAP22;FGD4;ARHGAP20;CHN2;FLNA;MYH11;A2M;MYH10;BUB1;CENPU;PPP1R14A;LIMK…
Response to elevated platelet cytosolic Ca2+ Homo sapiens R-HSA-76005	37/110	2.37137e-08	1.62252e-06	0	0	3.40364	59.7584	LGALS3BP;ITIH4;ECM1;ITIH3;SPARC;WDR1;ITGB3;SERPINE1;PDGFB;PDGFA;CLU;THBS1;ISLR;CLEC3B;CFL1;HABP4;TIMP3;PHACTR2;FLNA;QSOX1;FAM3C;TIMP1;A2M;SRGN;TGFB2;TGFB1;TGFB3;ACTN1;IGF2;FN1;APOA1;ACTN4;SOD1;SERPING1;CALM1;GAS6;VCL
Defective B3GALTL causes Peters-plus syndrome (PpS) Homo sapiens R-HSA-5083635	19/37	2.55945e-08	1.66364e-06	0	0	7.06157	123.442	SEMA5A;SEMA5B;SPON2;ADAMTS12;THBS2;THBS1;THSD4;ADAMTS10;ADAMTSL1;ADAMTS4;ADAMTS15;ADAMTS2;ADAMTS3;ADAMTS1;ADAMTSL4;ADAMTSL2;ADAMTS9;ADAMTS6;ADAMTS7
O-glycosylation of TSR domain-containing proteins Homo sapiens R-HSA-5173214	19/38	4.49107e-08	2.78018e-06	0	0	6.68952	113.177	SEMA5A;SEMA5B;SPON2;ADAMTS12;THBS2;THBS1;THSD4;ADAMTS10;ADAMTSL1;ADAMTS4;ADAMTS15;ADAMTS2;ADAMTS3;ADAMTS1;ADAMTSL4;ADAMTSL2;ADAMTS9;ADAMTS6;ADAMTS7
RHO GTPases Activate Formins Homo sapiens R-HSA-5663220	37/114	6.85634e-08	4.05148e-06	0	0	3.22608	53.2158	ITGB1;ERCC6L;SRF;BUB1B;CDCA8;CENPA;ACTB;SKA1;AURKB;ACTG1;SKA2;CDC20;NUF2;SPDL1;BUB1;CENPU;PLK1;PPP2R5D;RHOC;RHOD;NDC80;ZWINT;RHOB;CENPE;CENPF;DIAPH3;CENPH;CENPI;CENPK;BIRC5;CENPM;KIF2C;EVL;CENPQ;SPC24;PFN2;SPC25
Diseases associated with glycosaminoglycan metabolism Homo sapiens R-HSA-3560782	15/26	9.99307e-08	5.64826e-06	0	0	9.11224	146.878	LUM;SDC2;SDC3;BGN;PRELP;HSPG2;DCN;ACAN;VCAN;GPC1;OGN;CSPG4;GPC4;AGRN;GPC6
Semaphorin interactions Homo sapiens R-HSA-373755	26/67	1.11484e-07	6.03869e-06	0	0	4.24822	68.0114	SEMA5A;ITGB1;NRP1;SEMA7A;PLXND1;SEMA3A;MYL12B;DPYSL4;RRAS;DPYSL3;CFL1;ERBB2;MYH11;PIP5K1C;MYH10;FARP2;LIMK2;ITGA1;RHOC;RHOB;MYL6;FES;MYH9;PLXNB1;MYL9;CDK5R1
Mitotic Prometaphase Homo sapiens R-HSA-68877	34/107	4.04674e-07	2.10431e-05	0	0	3.12403	45.9863	ERCC6L;CDCA5;BUB1B;NCAPG;CDCA8;CENPA;SKA1;AURKB;SMC2;SKA2;CDC20;CCNB2;CCNB1;NUF2;SPDL1;BUB1;CENPU;PLK1;PPP2R5D;NDC80;ZWINT;CENPE;CENPF;CENPH;CENPI;CENPK;CDK1;BIRC5;CENPM;KIF2C;NCAPD2;CENPQ;SPC24;SPC25
RHO GTPases activate CIT Homo sapiens R-HSA-5625900	11/16	4.3405e-07	2.17025e-05	0	0	14.6836	215.116	MYL6;PRC1;KIF14;MYH9;MYH11;RHOC;MYL9;MYH10;CIT;RHOB;MYL12B
[truncated: 1,274 more rows]

## Sheet: DOWN__MSigDB
Term	Overlap	P-value	Adjusted P-value	Old P-value	Old Adjusted P-value	Odds Ratio	Combined Score	Genes
[truncated: 50 more rows]

[truncated: 3 more sheets: DOWN_Wiki, DOWN_Elsevier, DOWN_KEGG]
